# Supplementary material for: Rovibrational Spectroscopy of Trans and Cis Conformers of 2-Furfural from High-Resolution Fourier Transform and QCL Infrared Measurements
Source: MDPI journal article supplement (doi:10.3390/molecules28104165), 2023-05-18

Obs-Calc Error(blended) distribution of the trans-furfural Excited state  $\nu_{17}$ 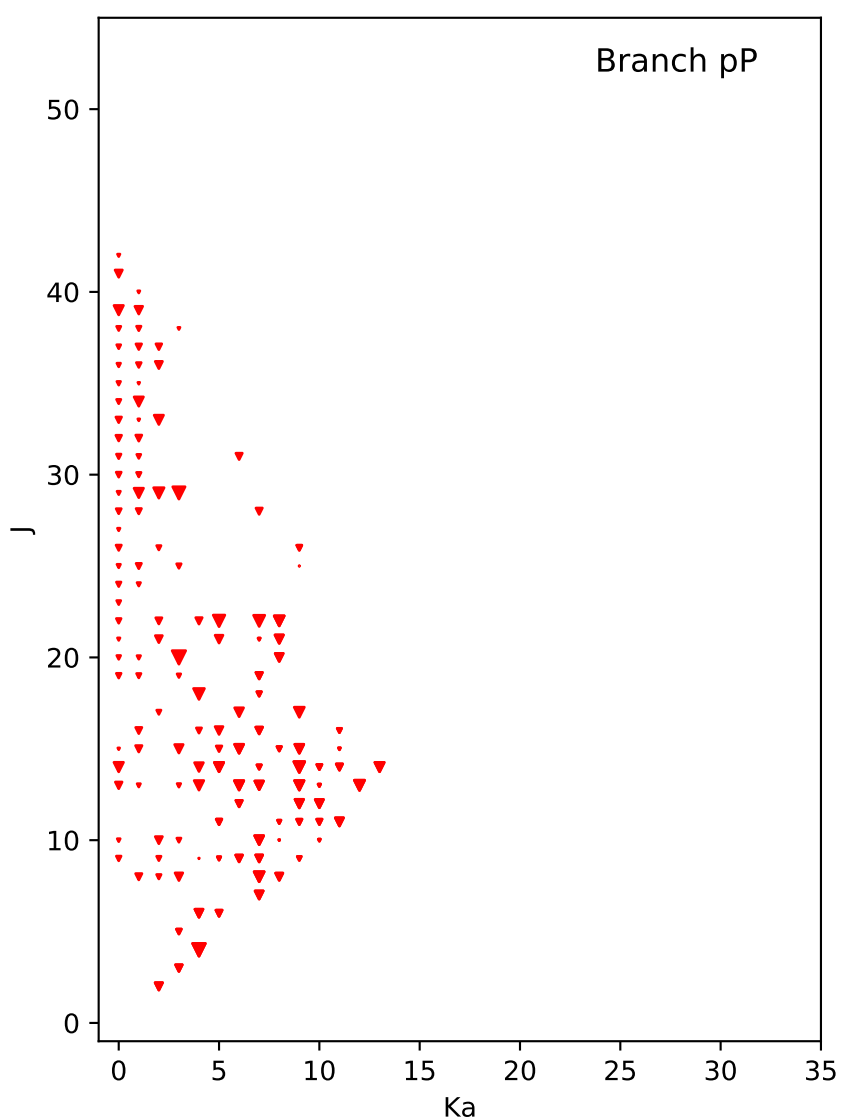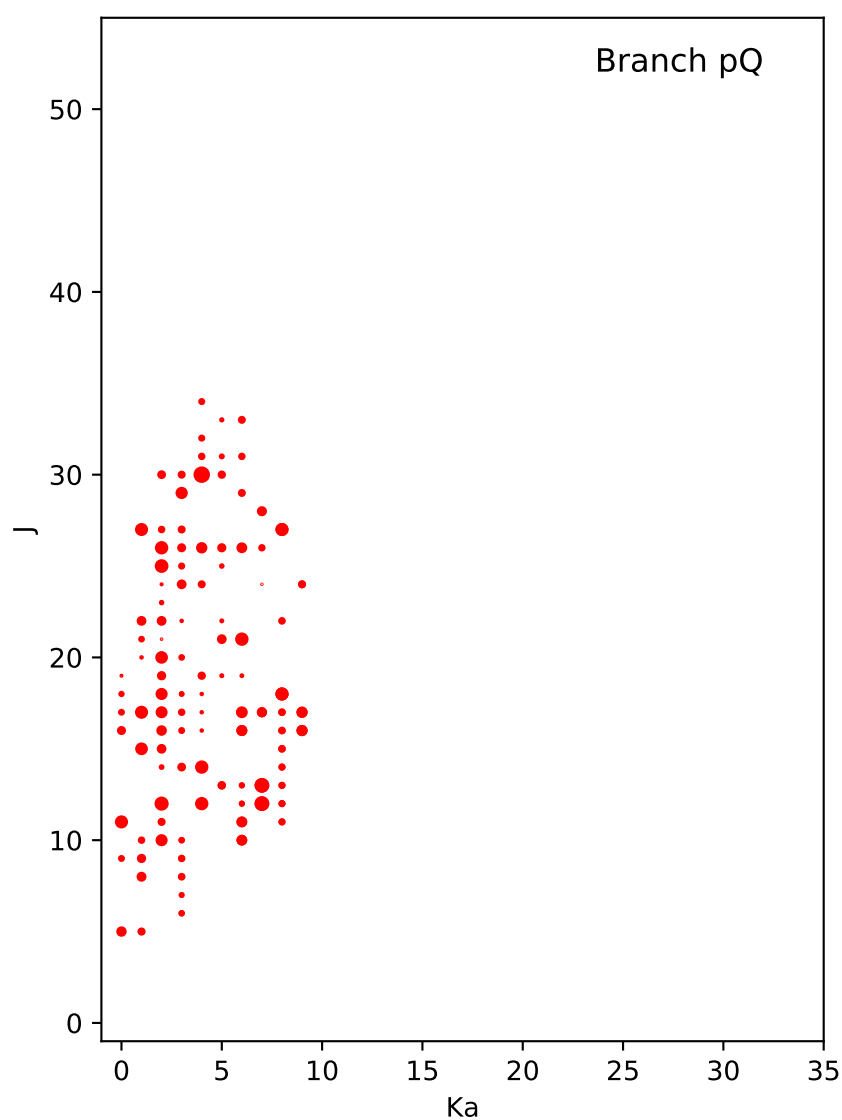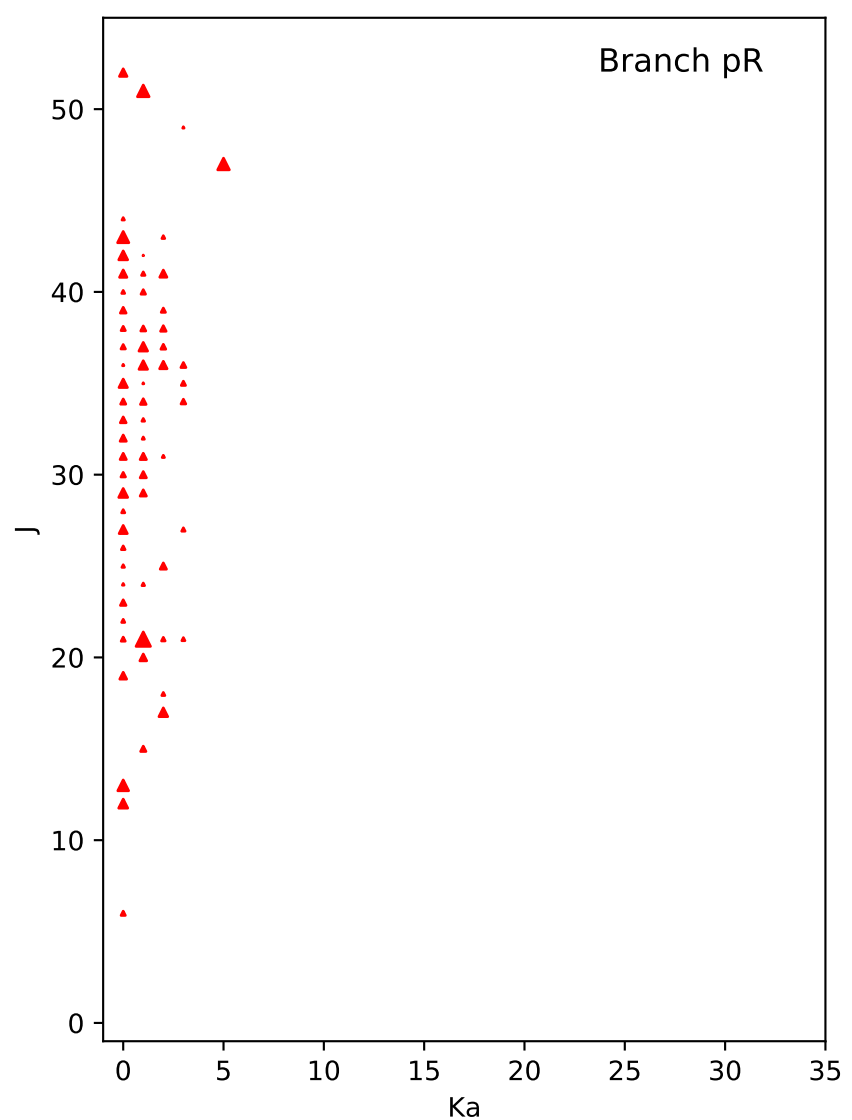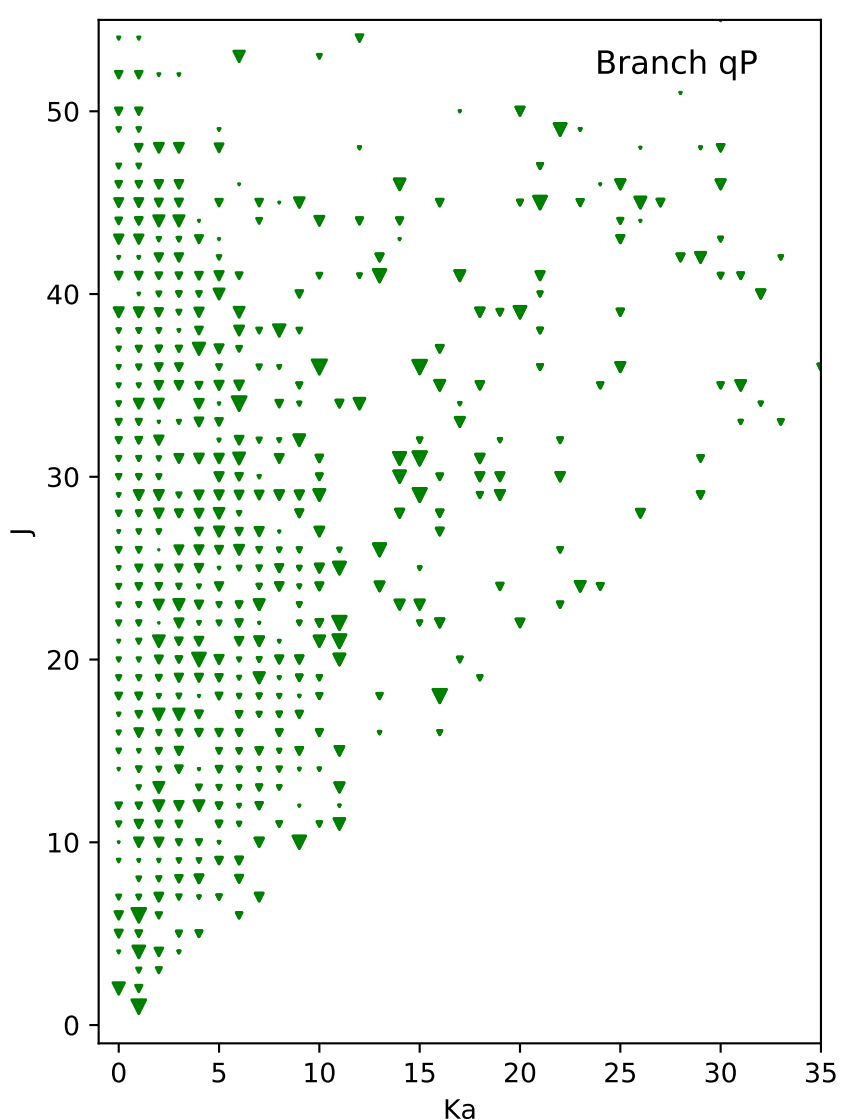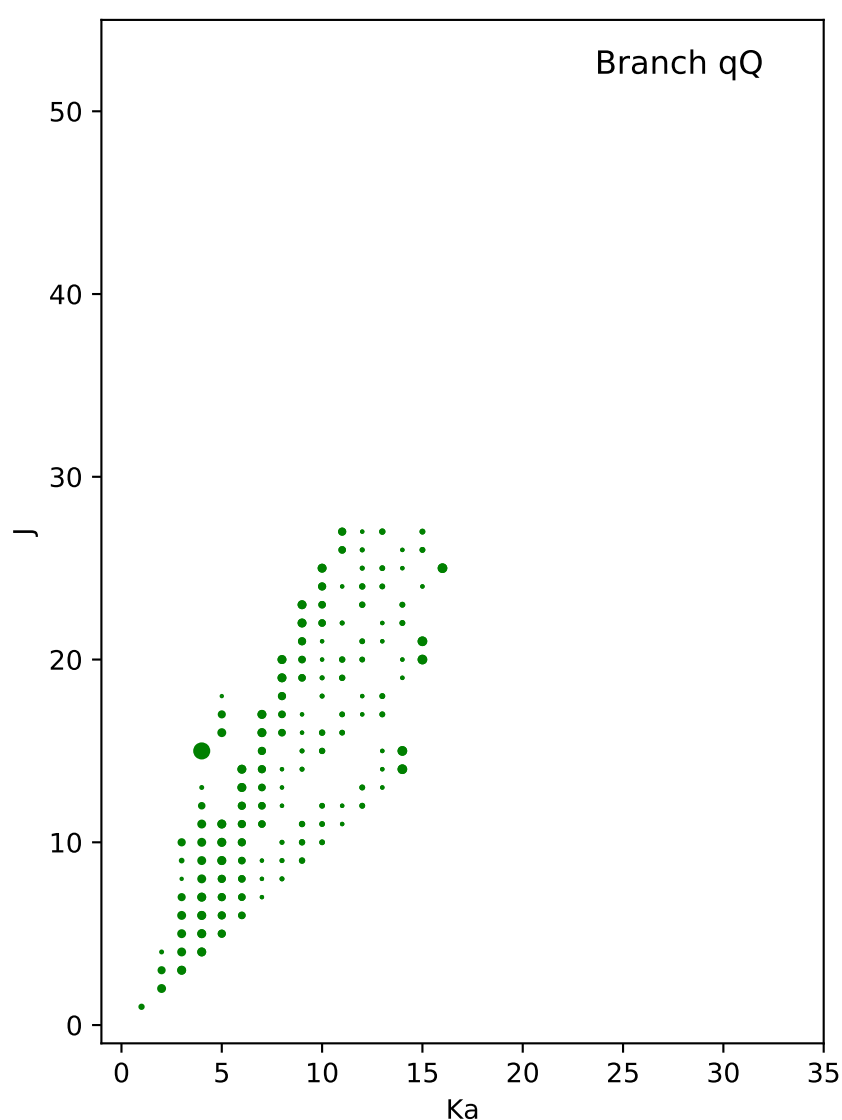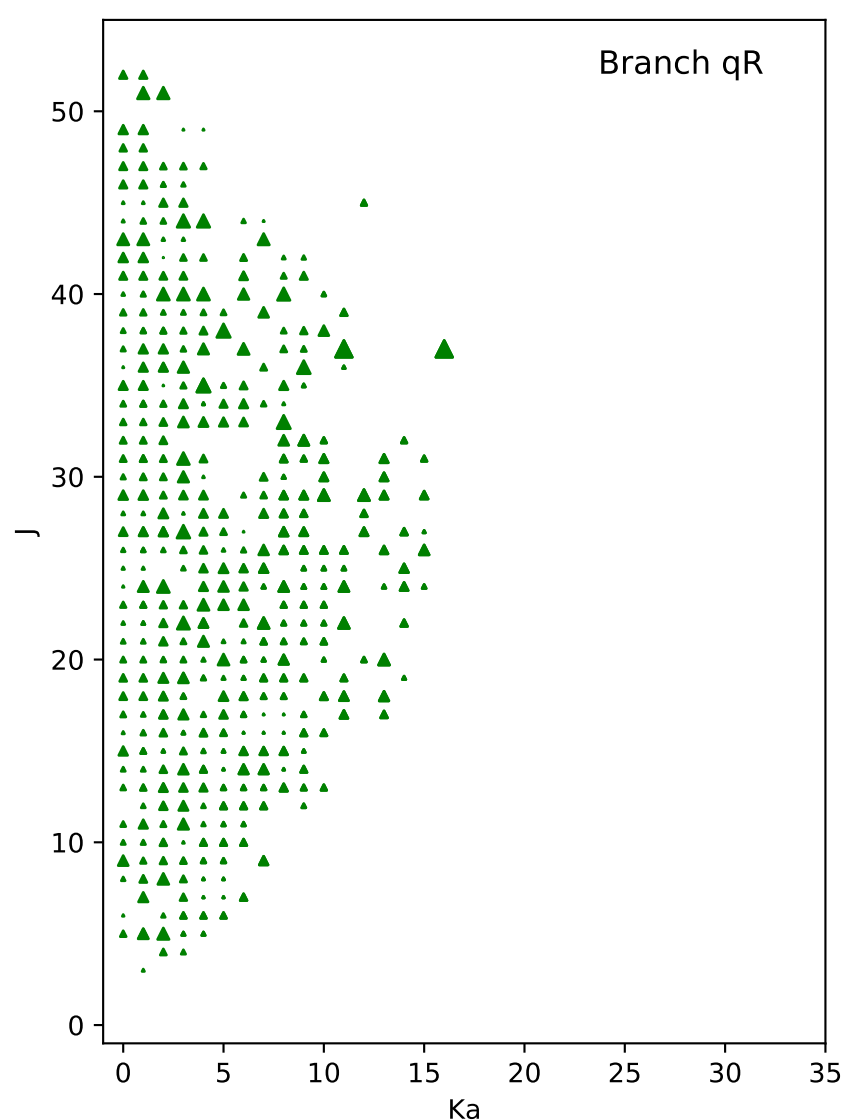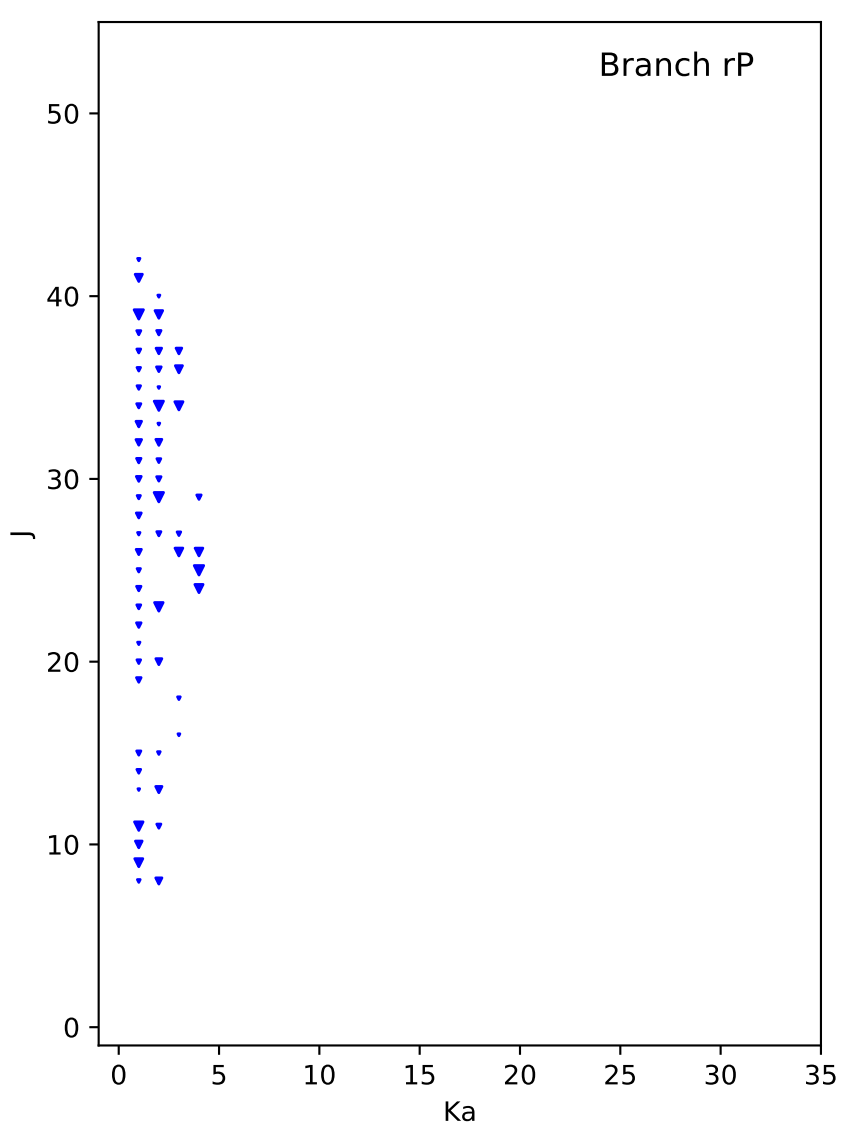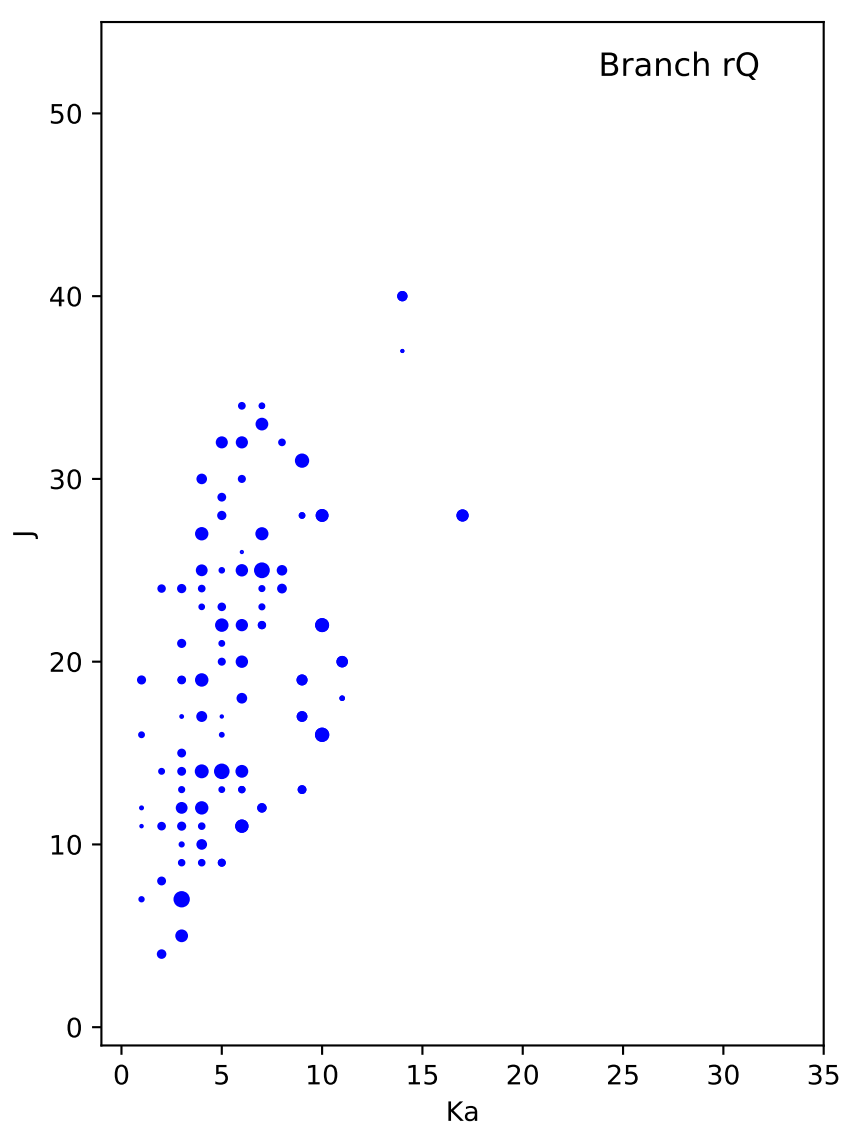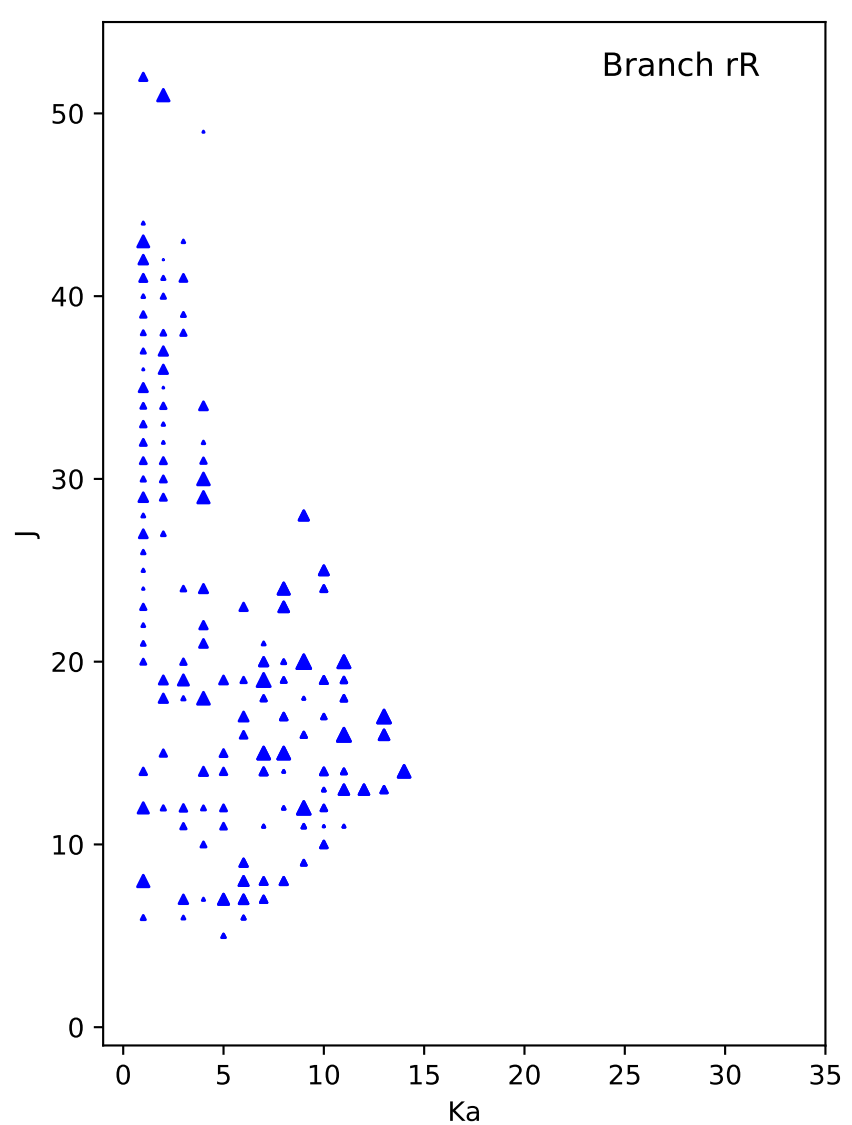

Obs-Calc Error(blended) distribution of the trans-furfural Excited state  $\nu_{23}$ 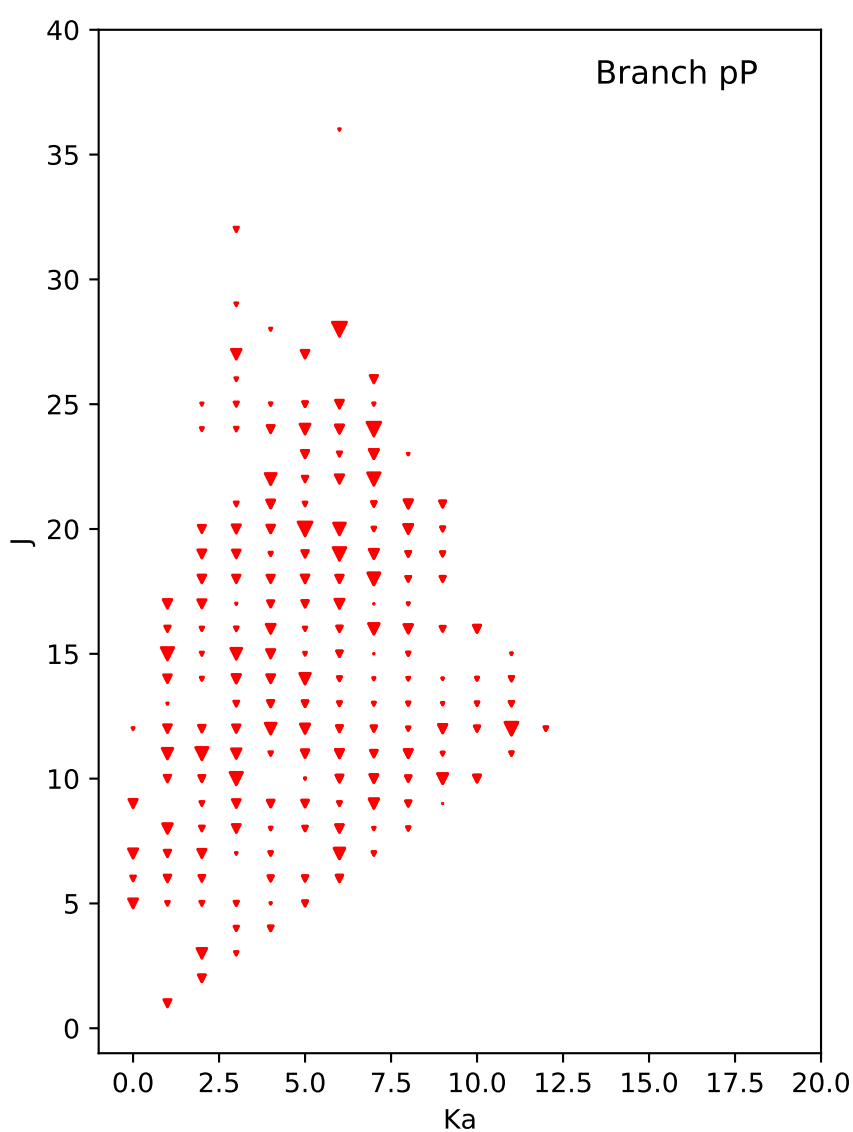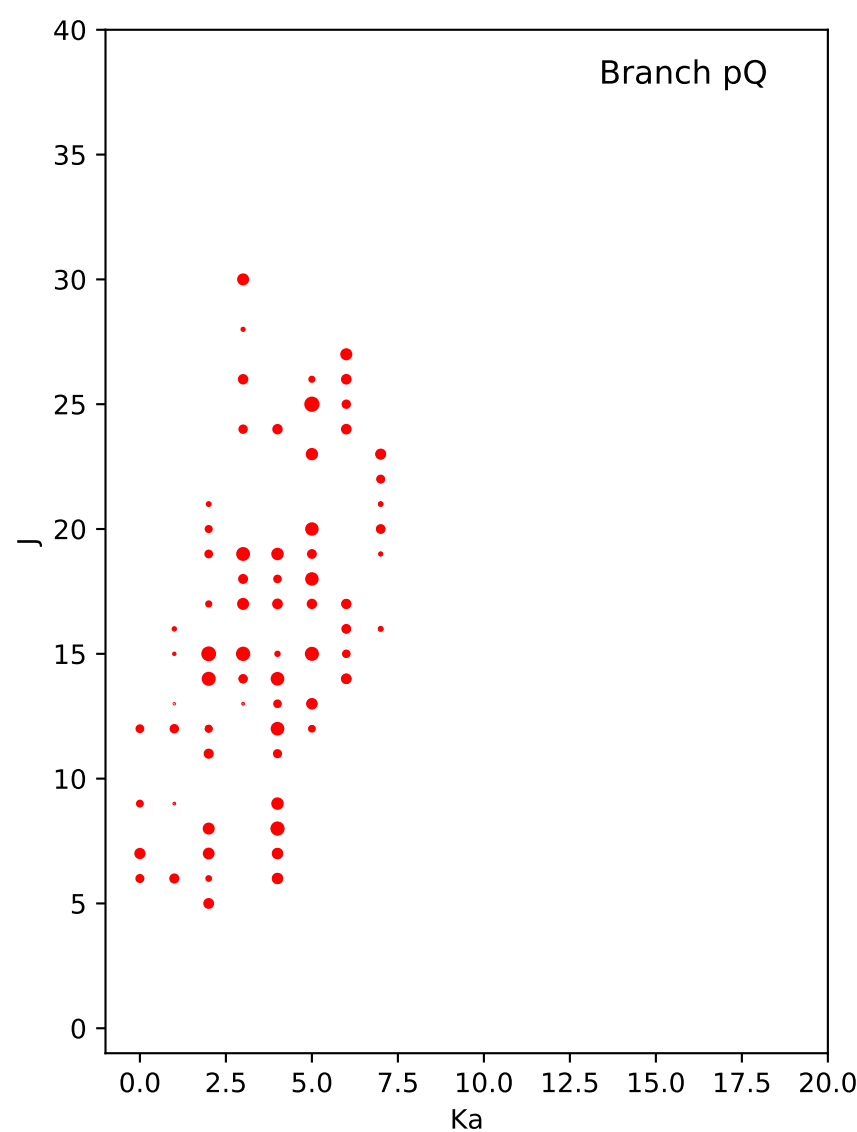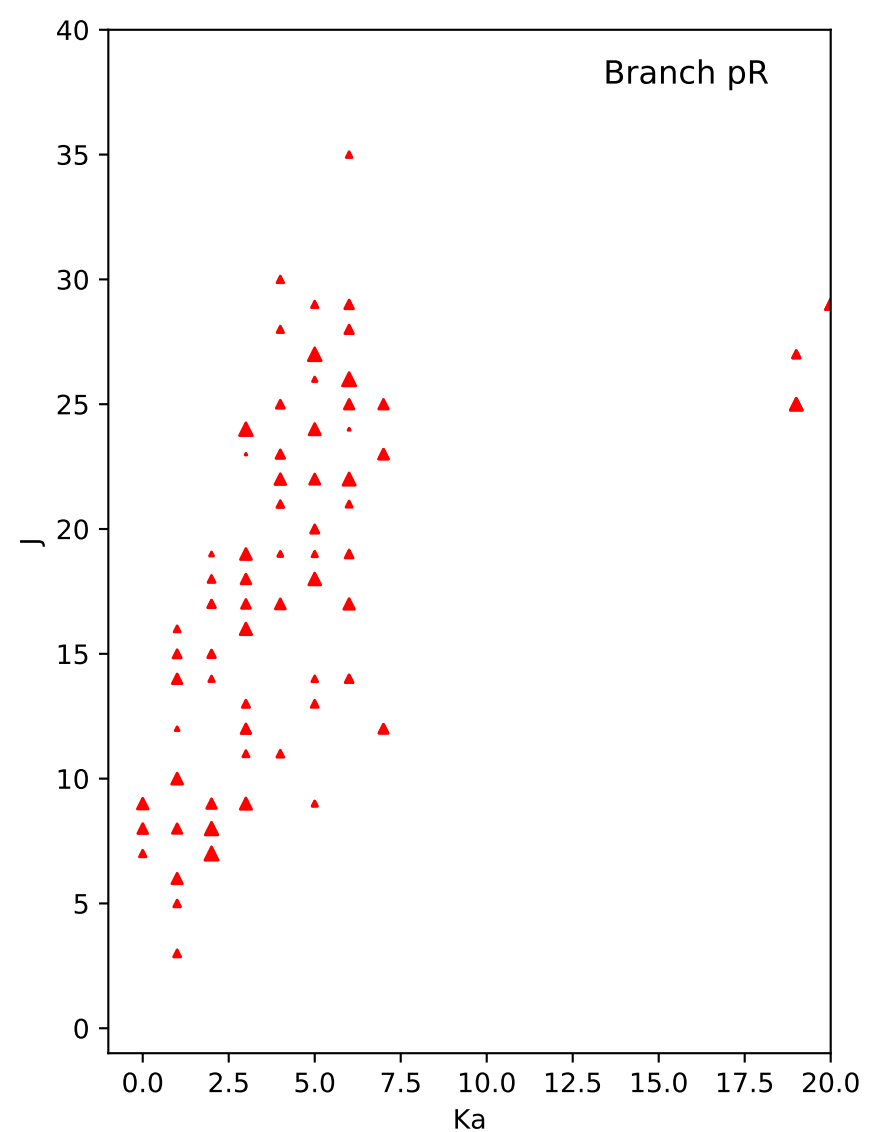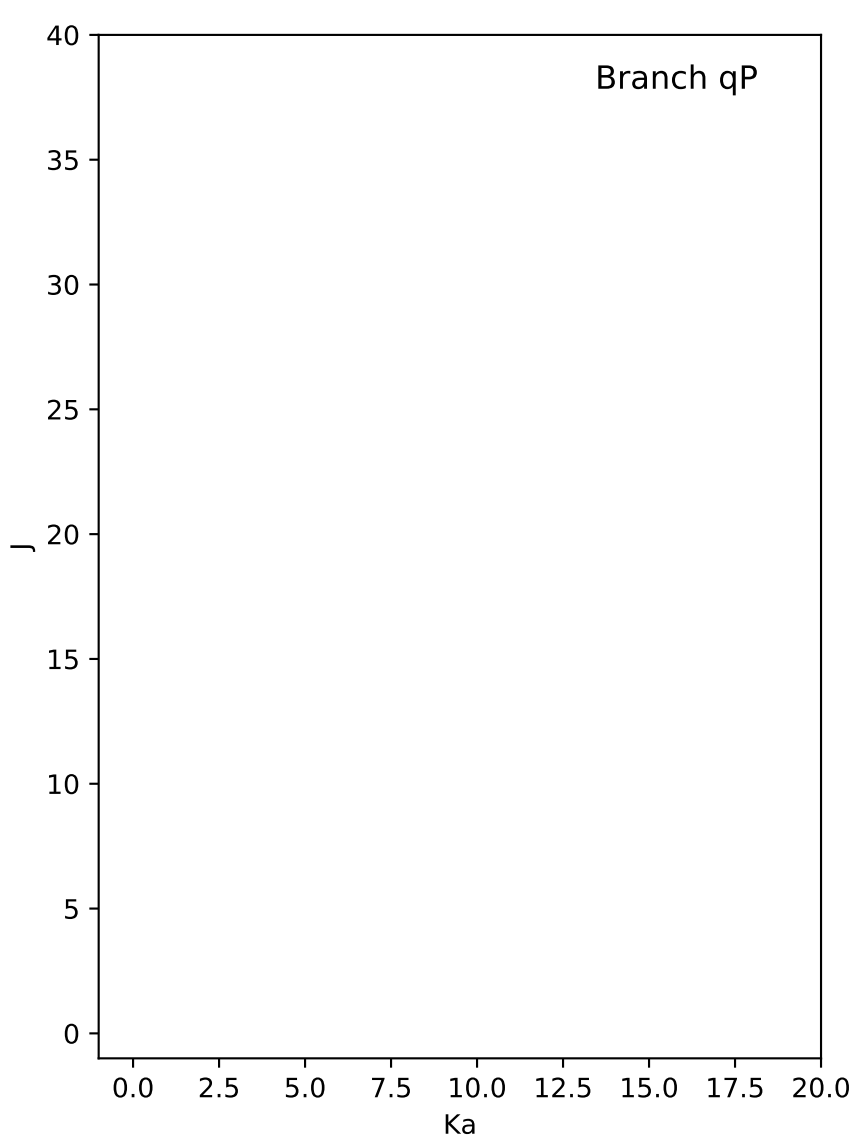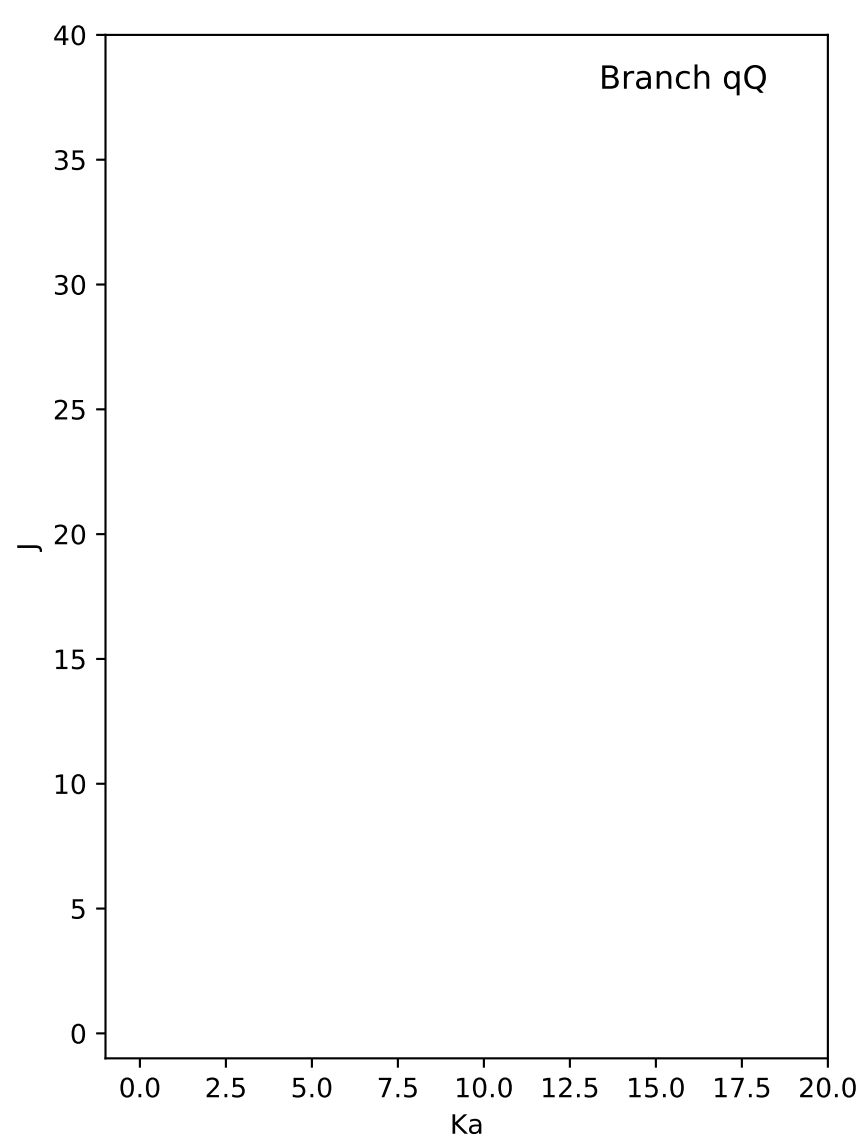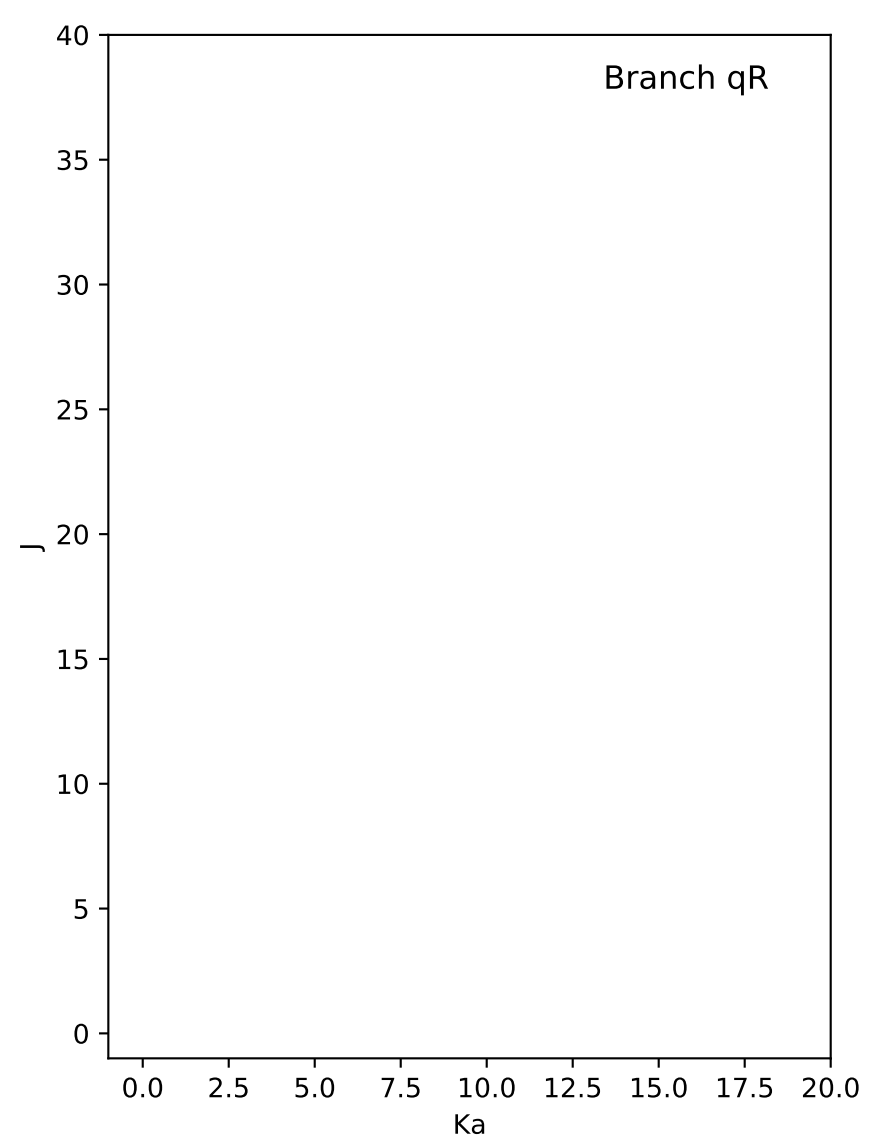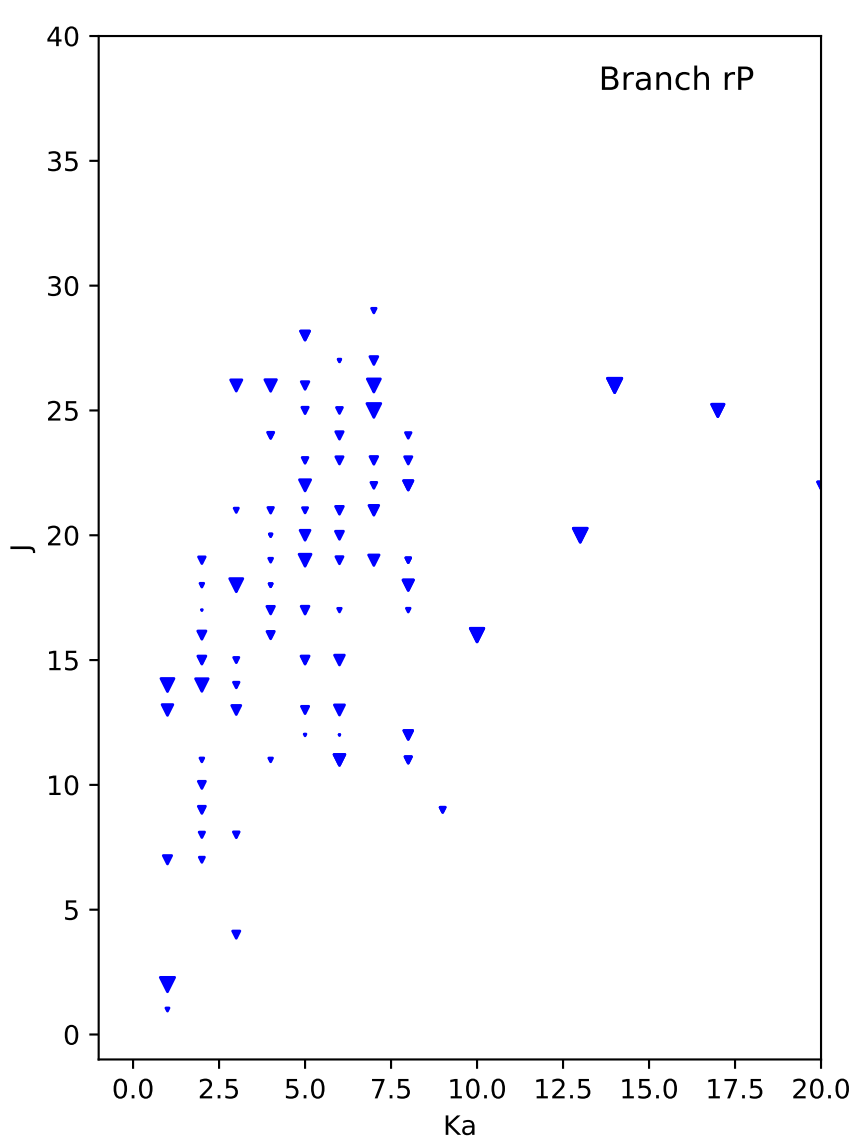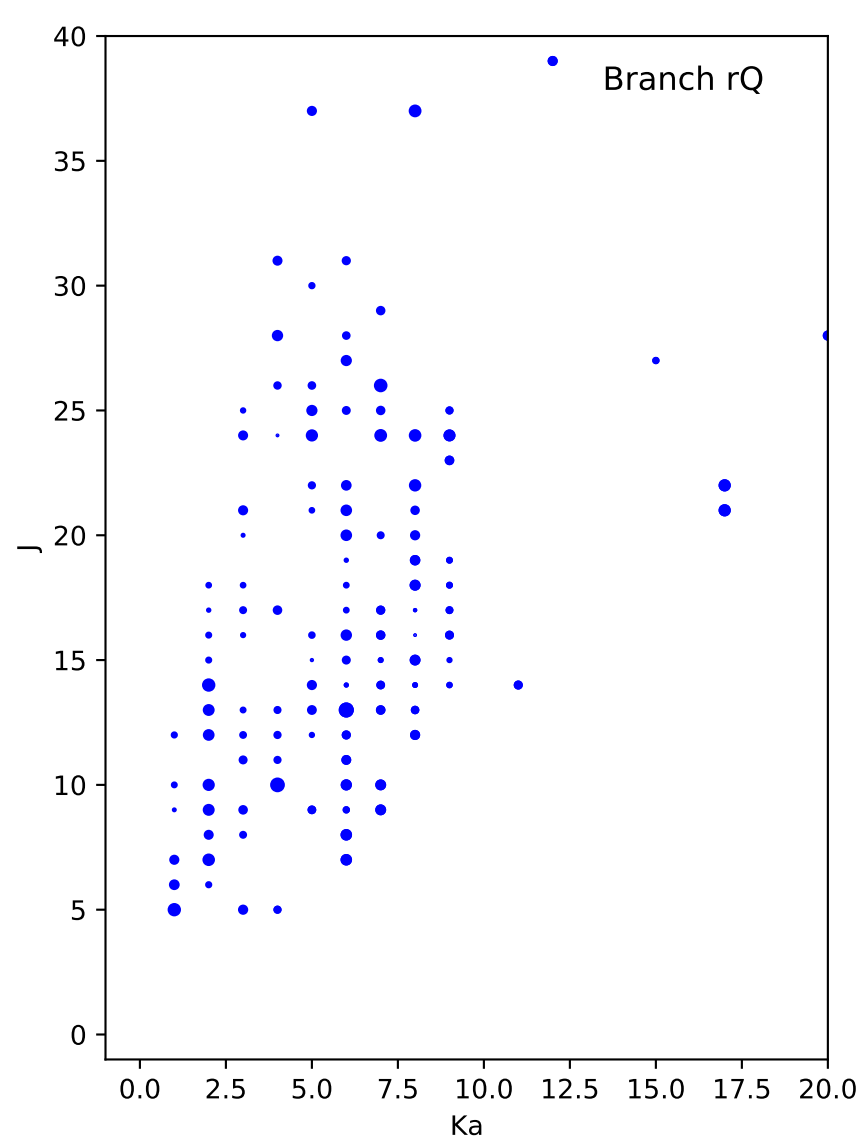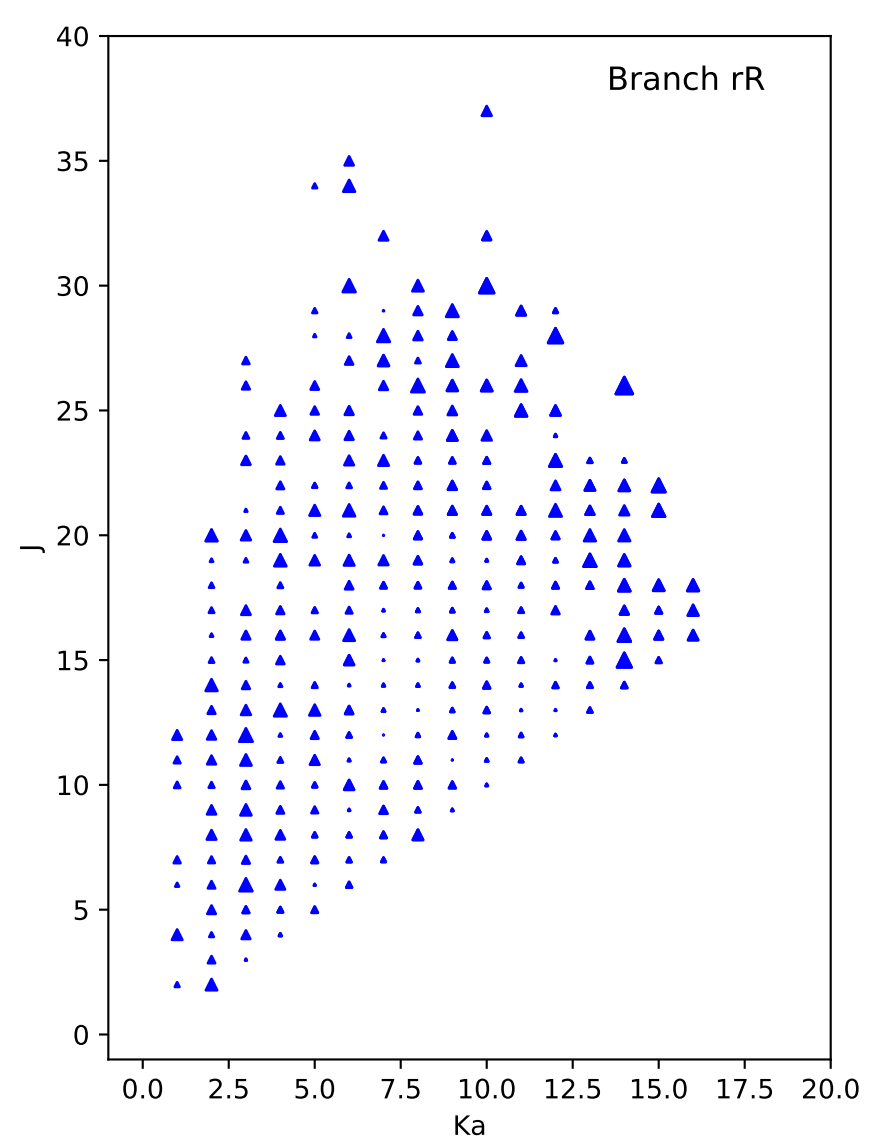

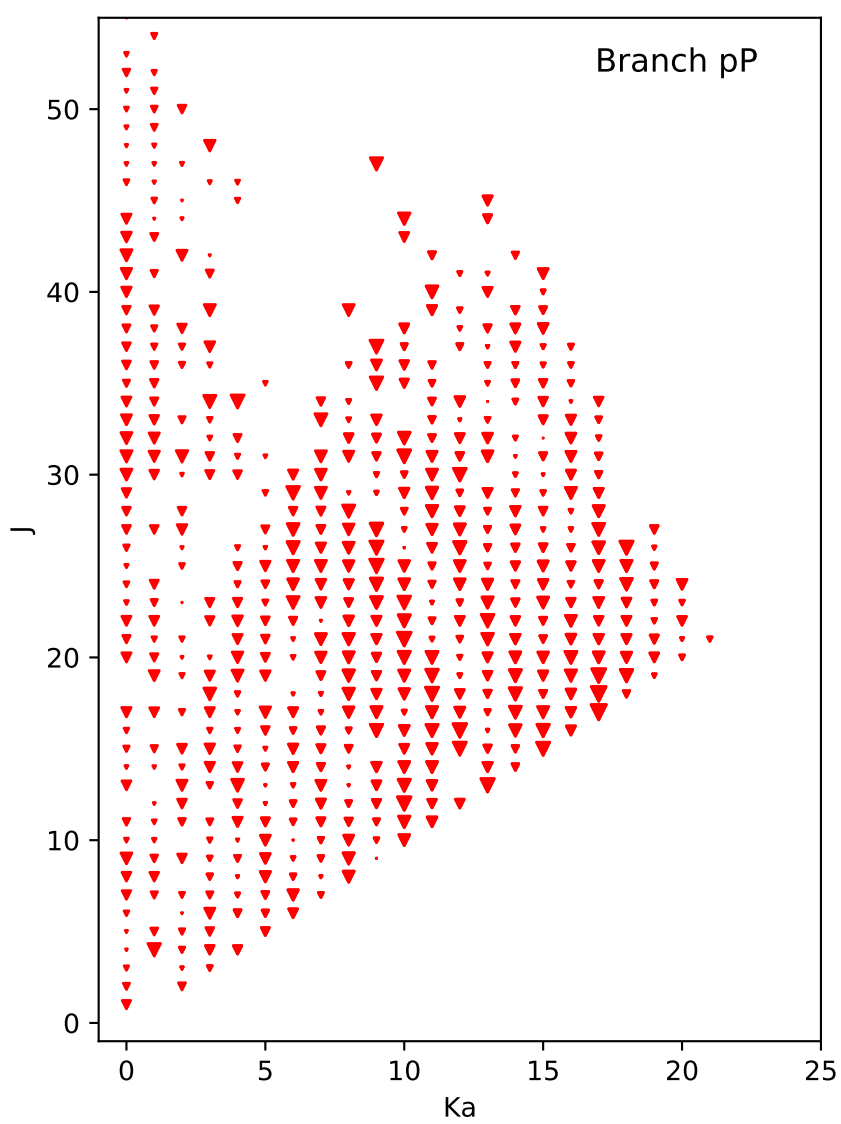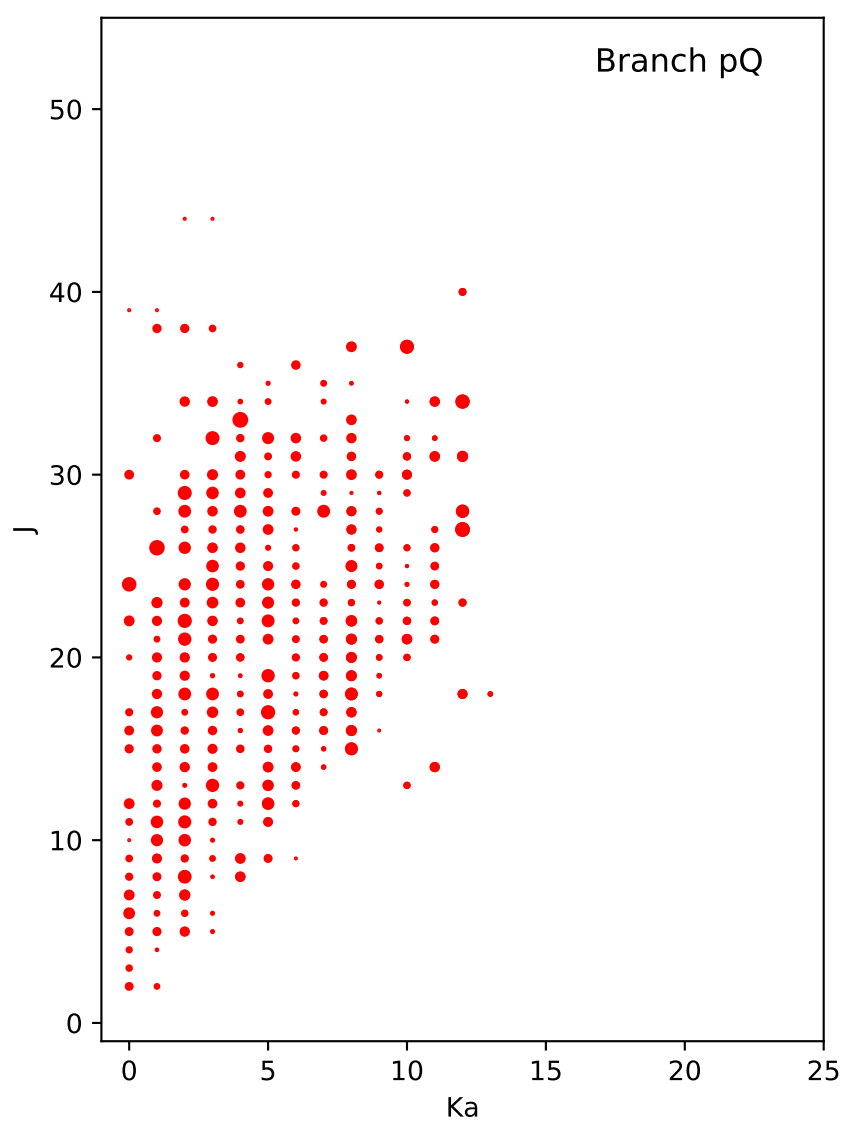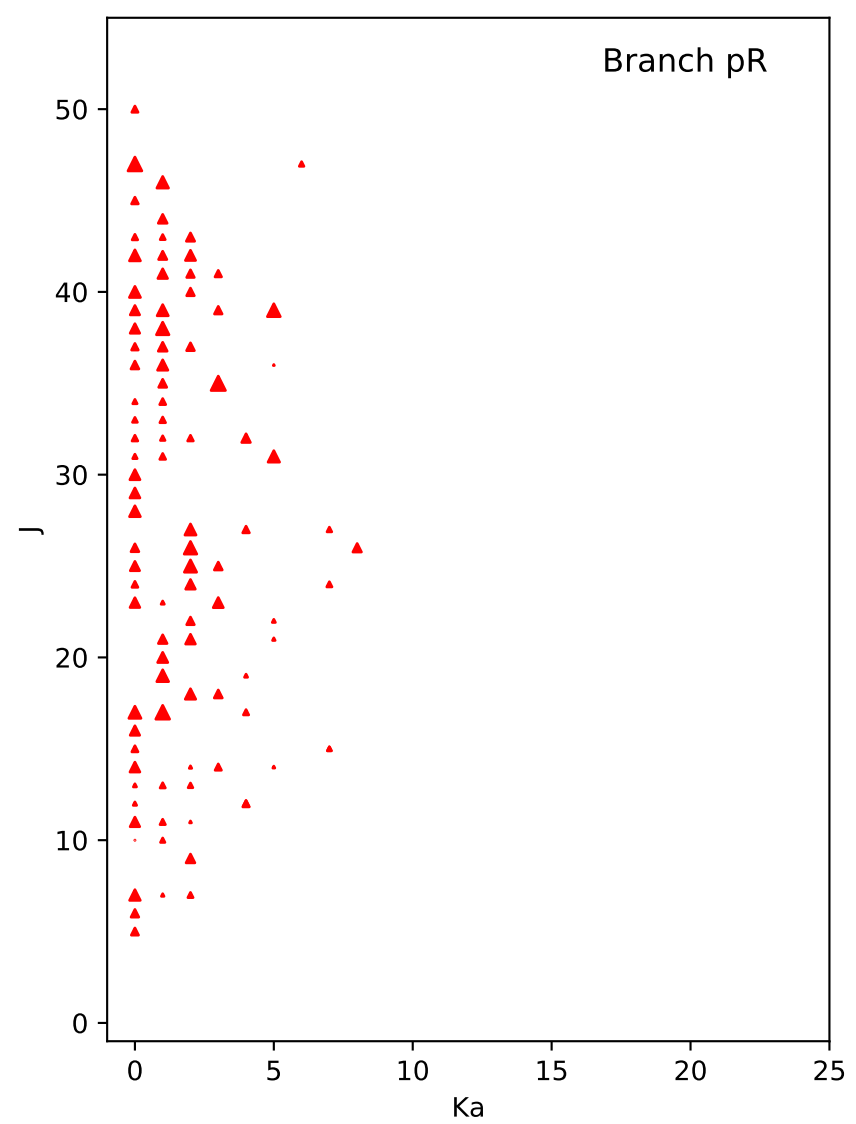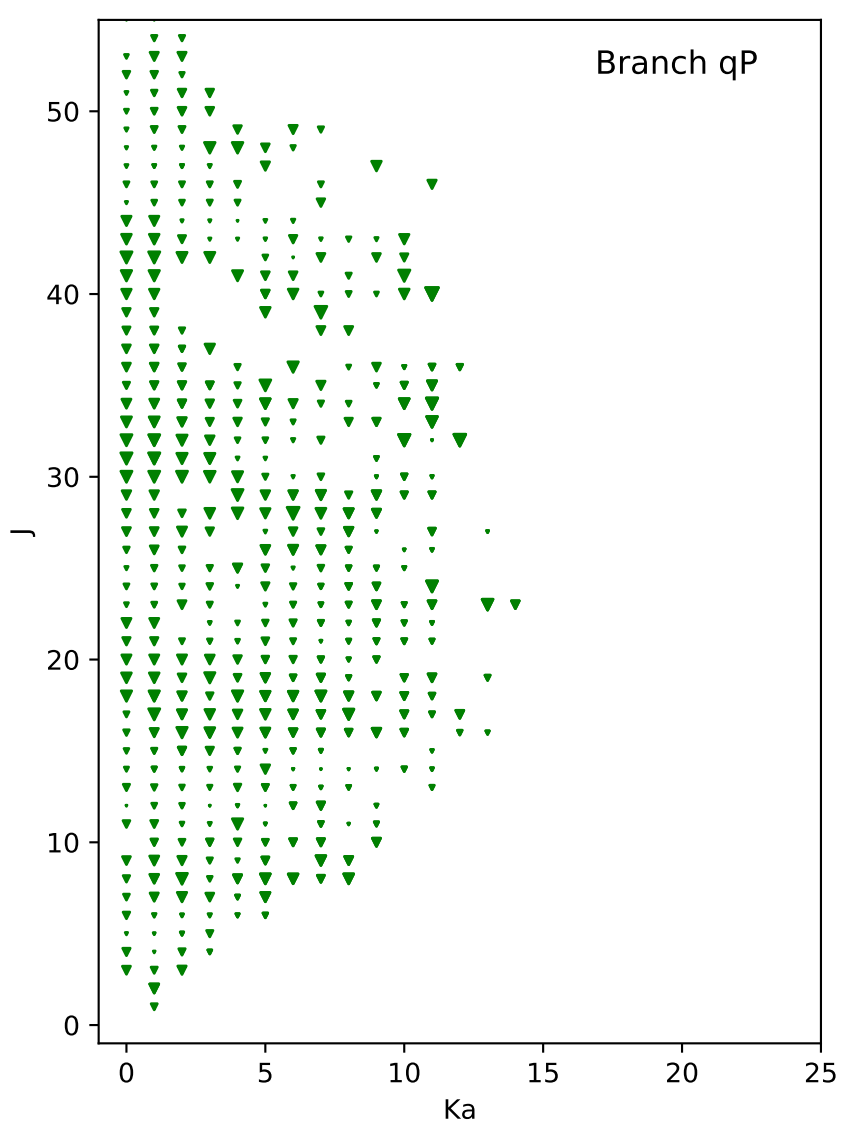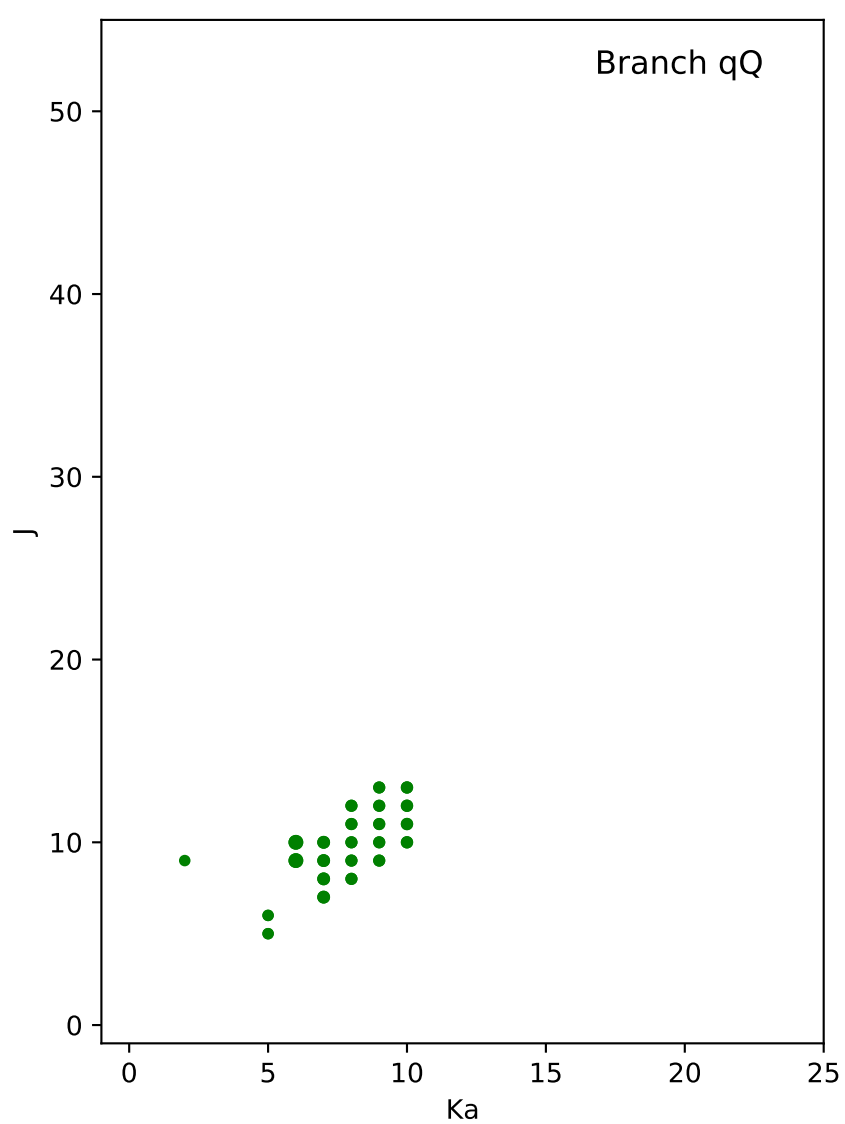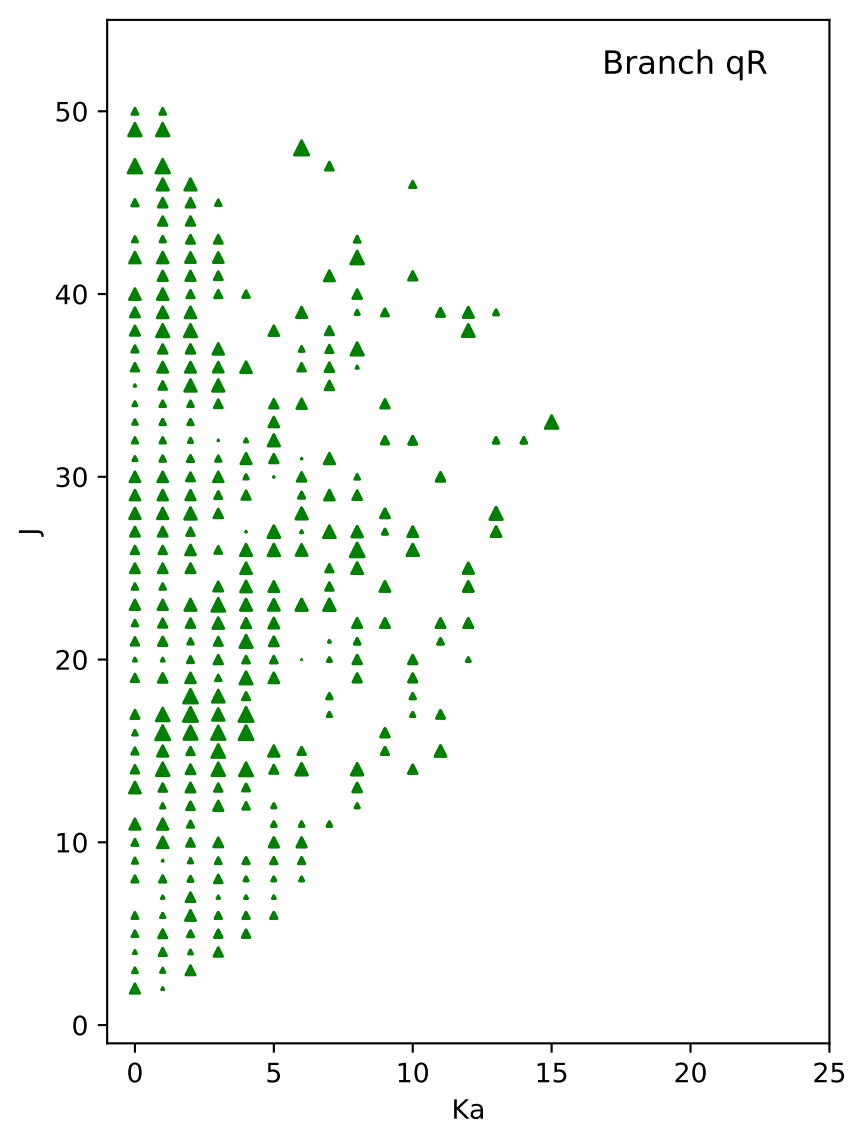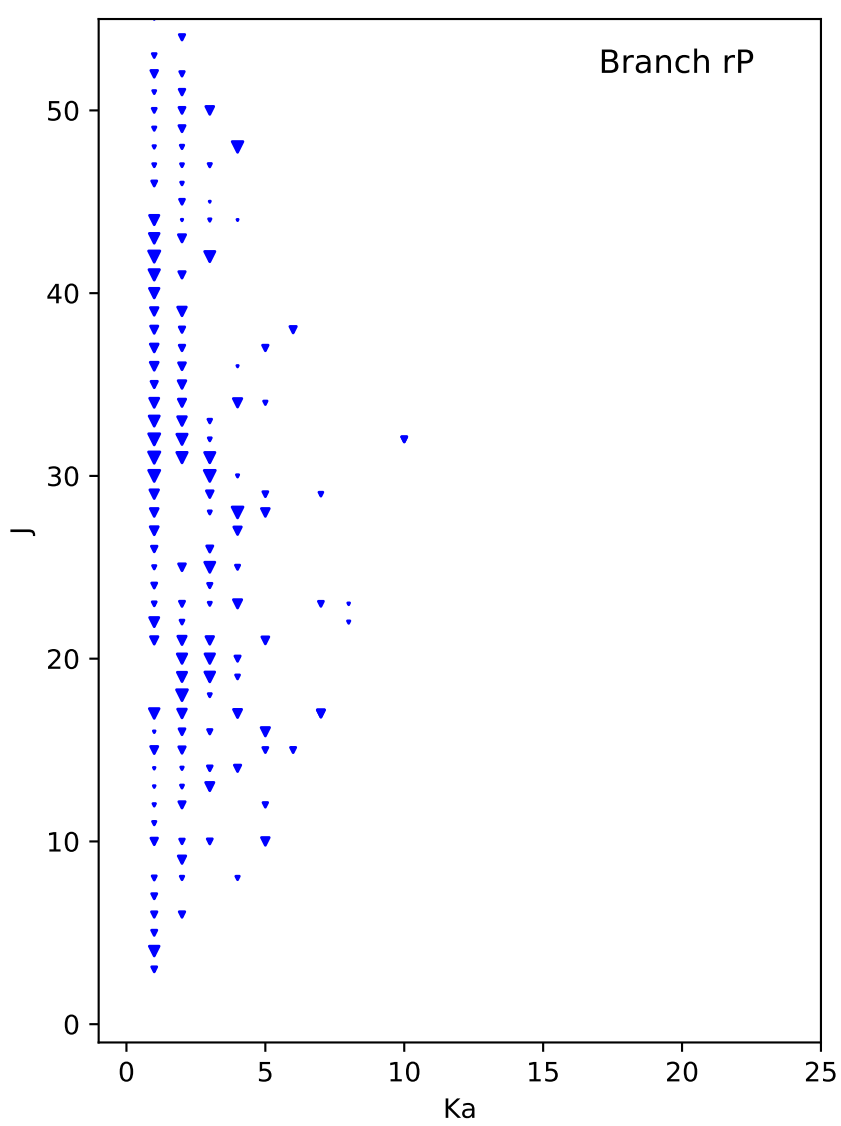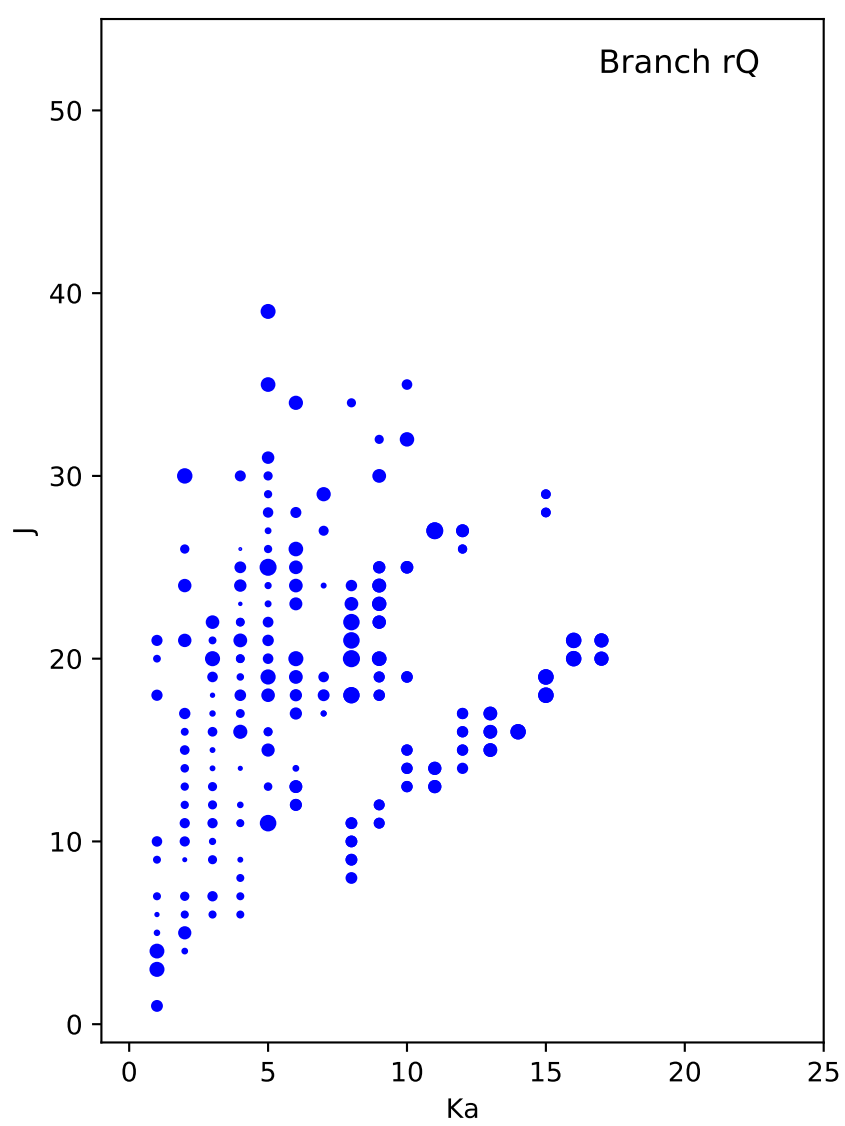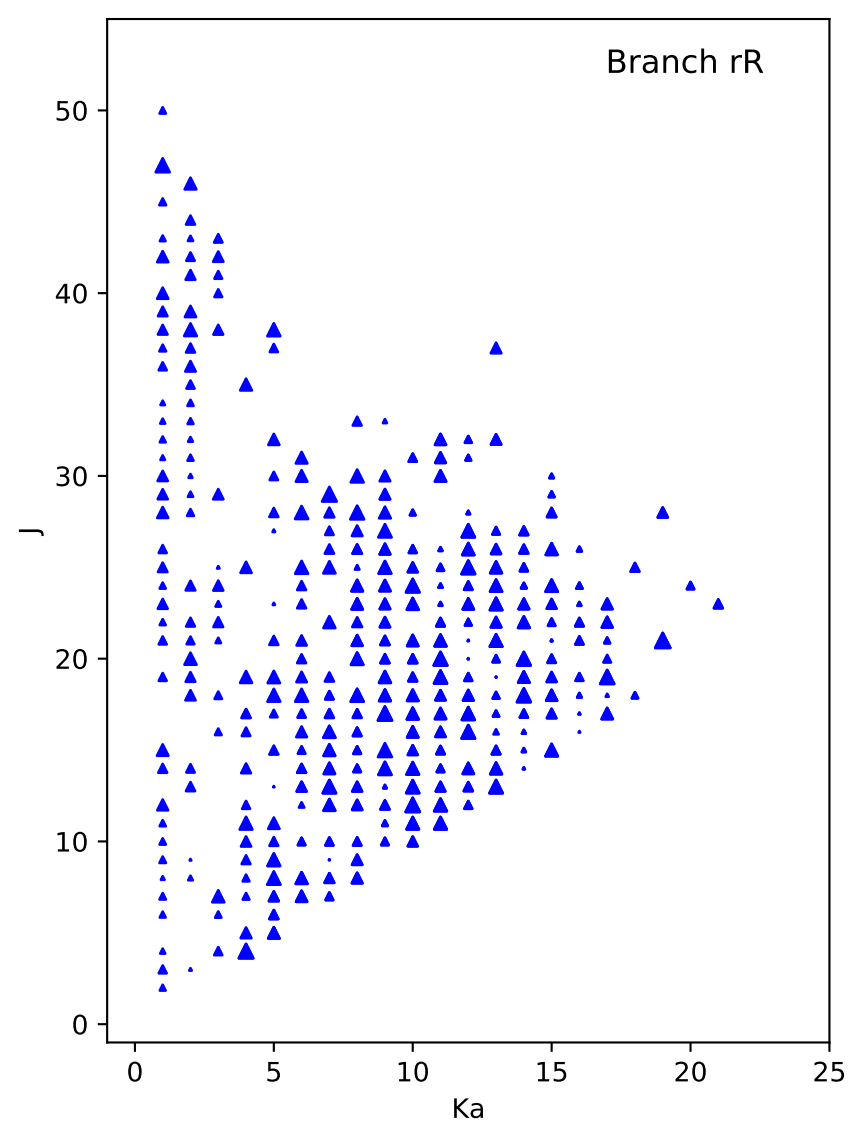

Obs-Calc Error(blended) distribution of the trans-furfural Excited state  $\nu_7$ 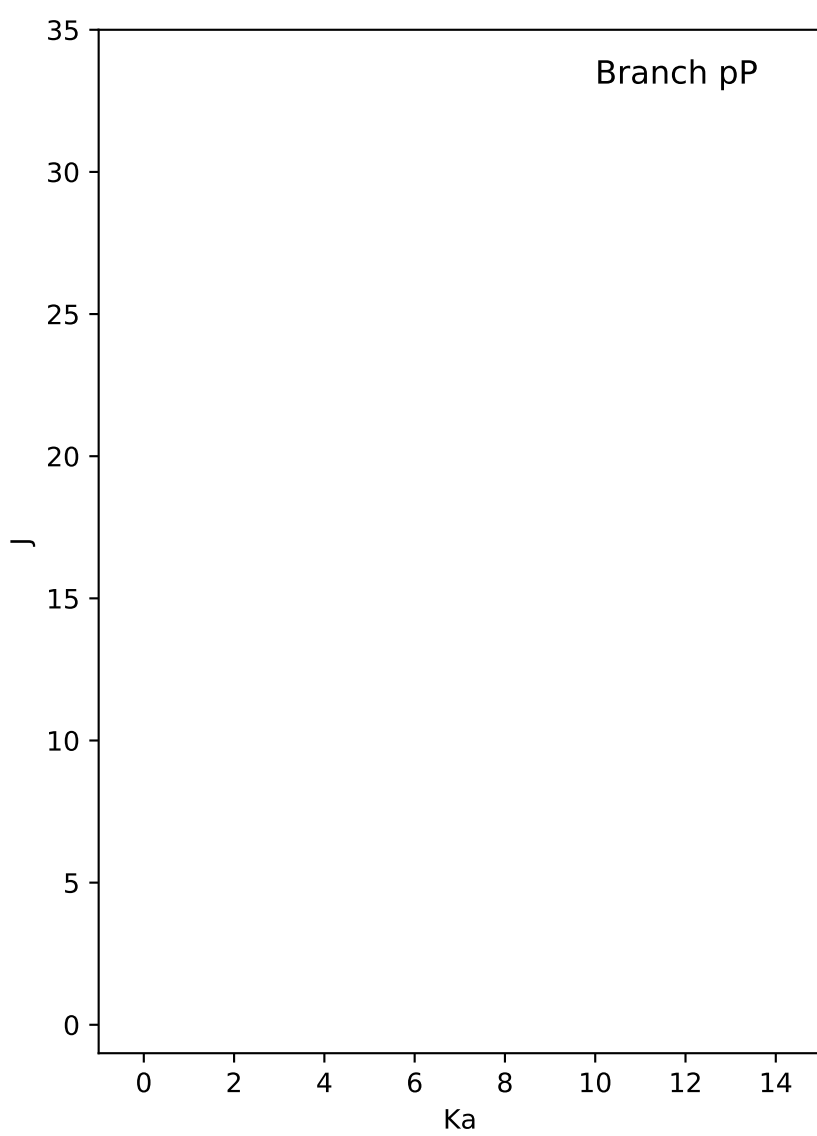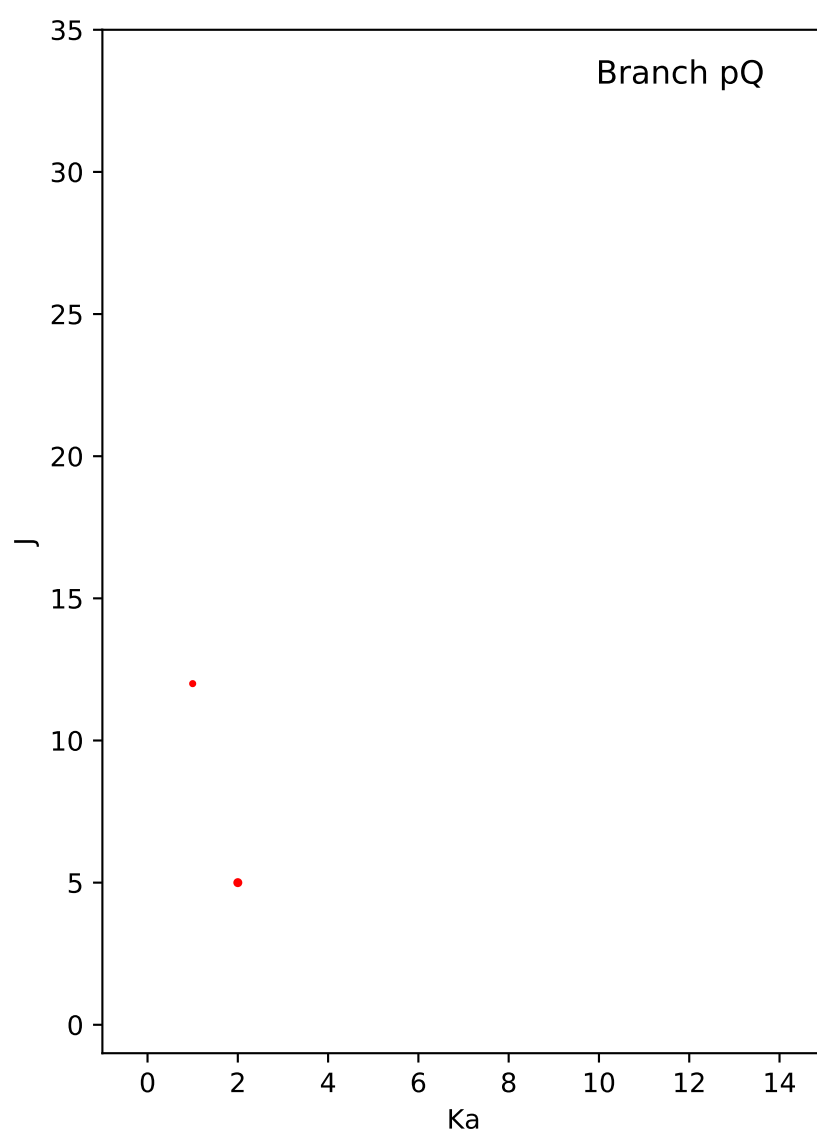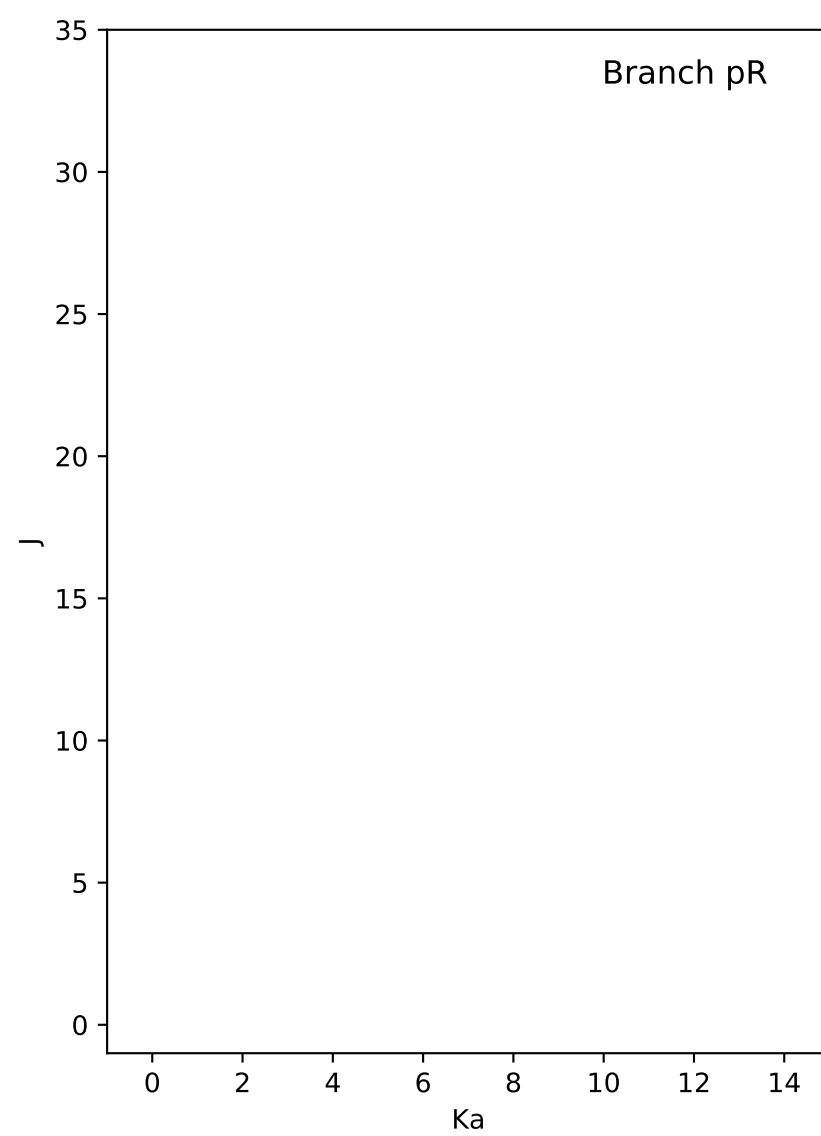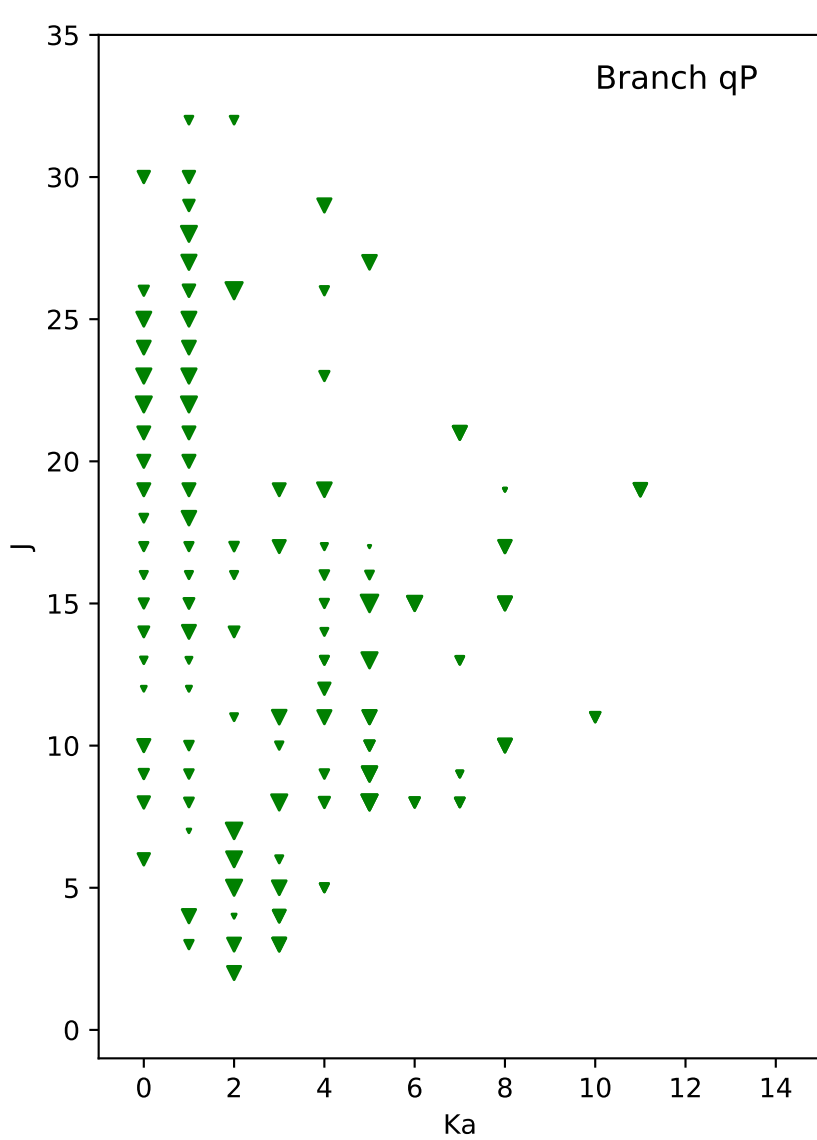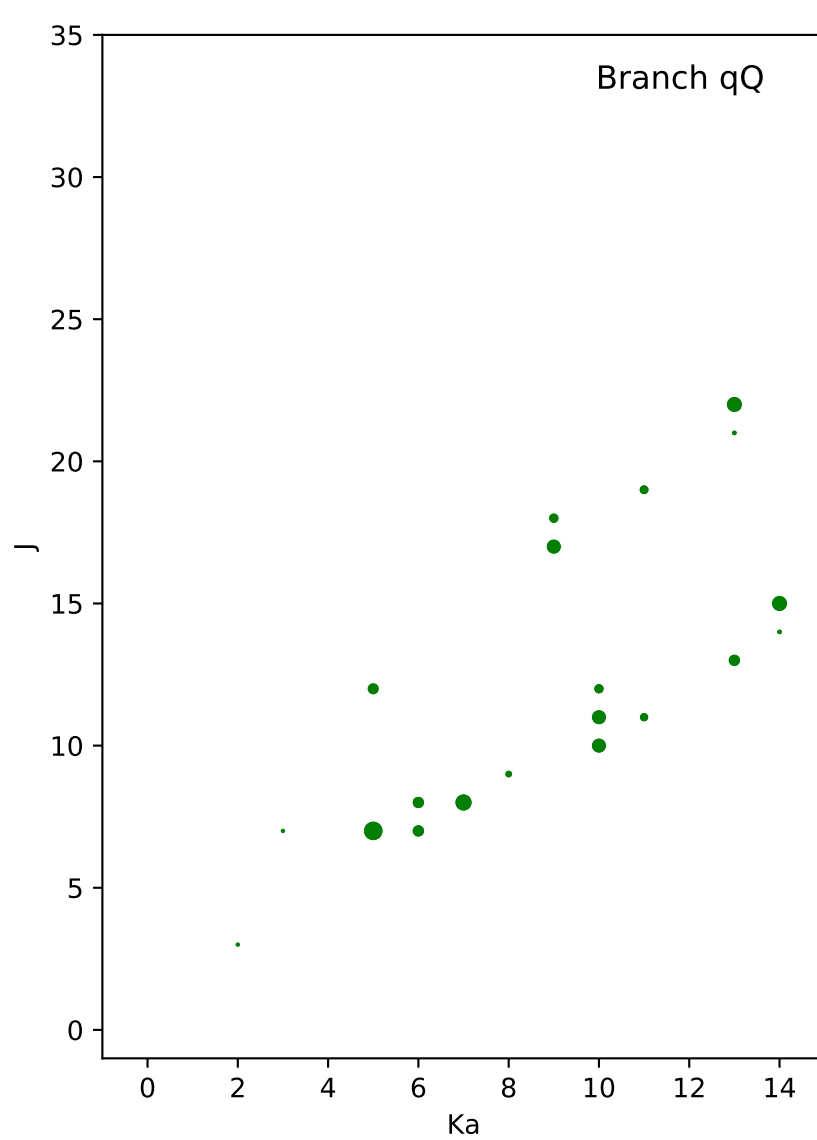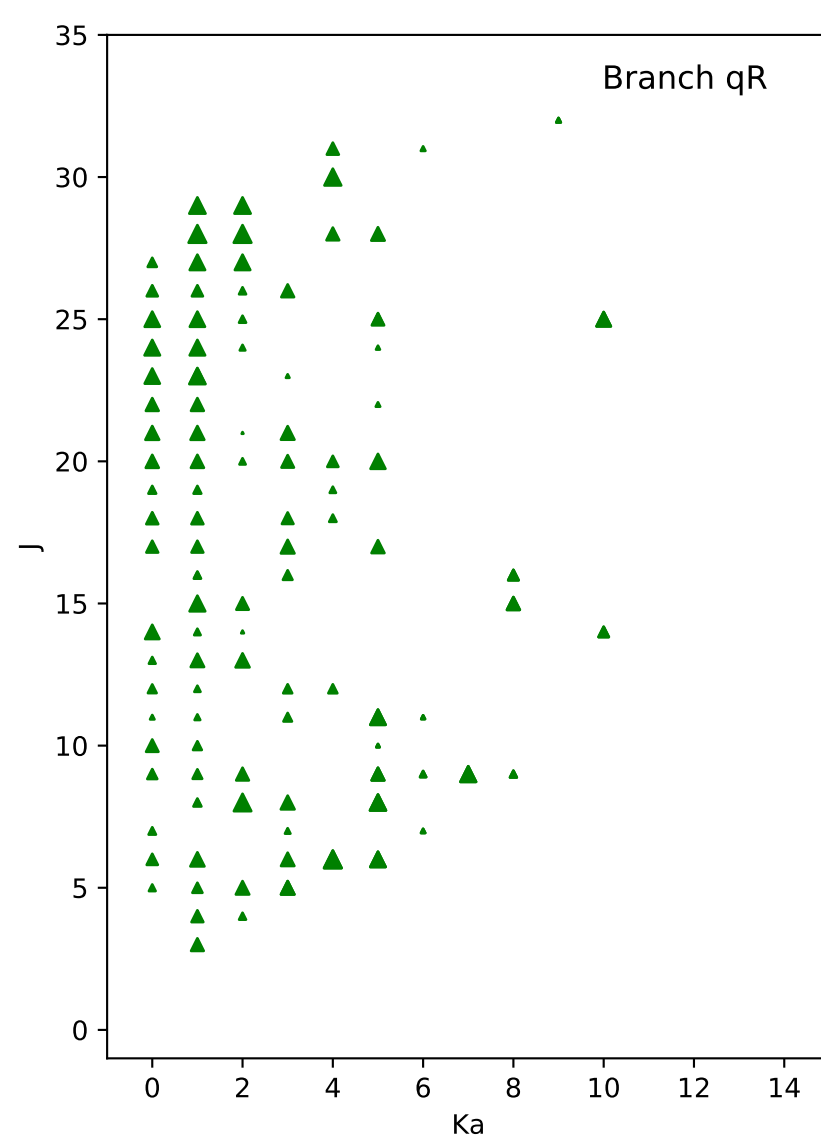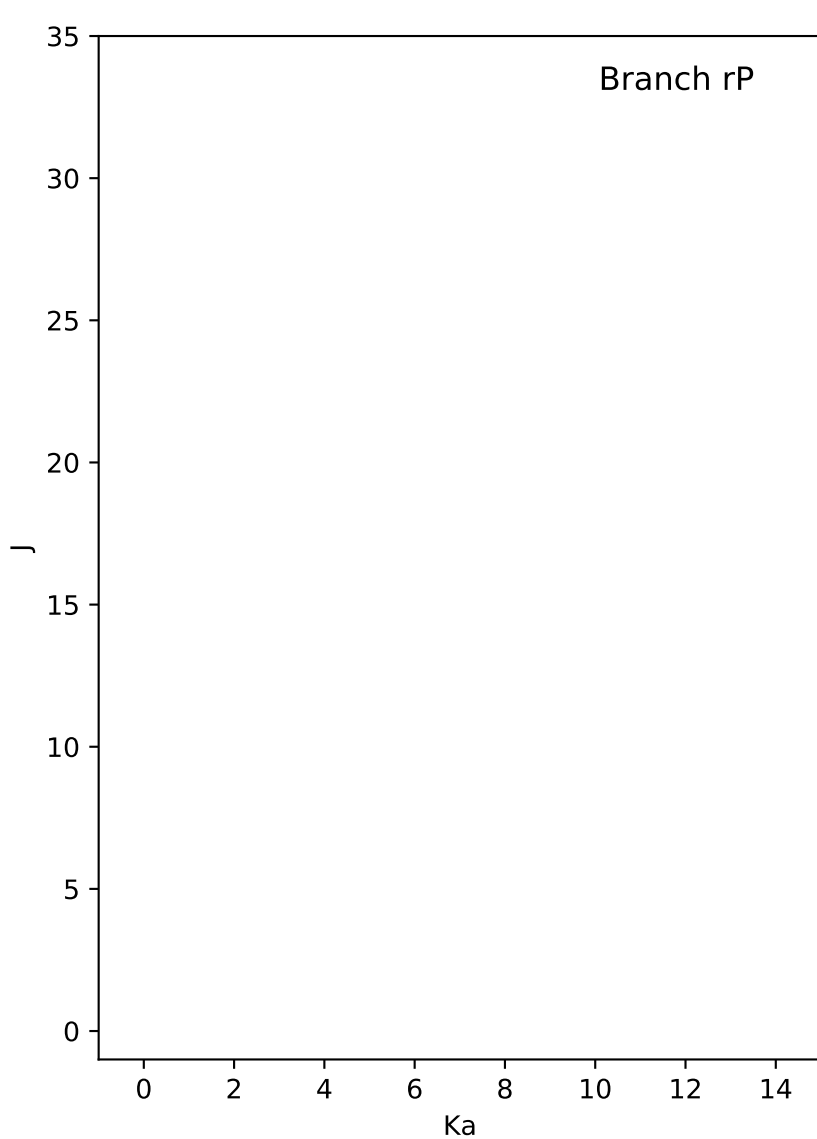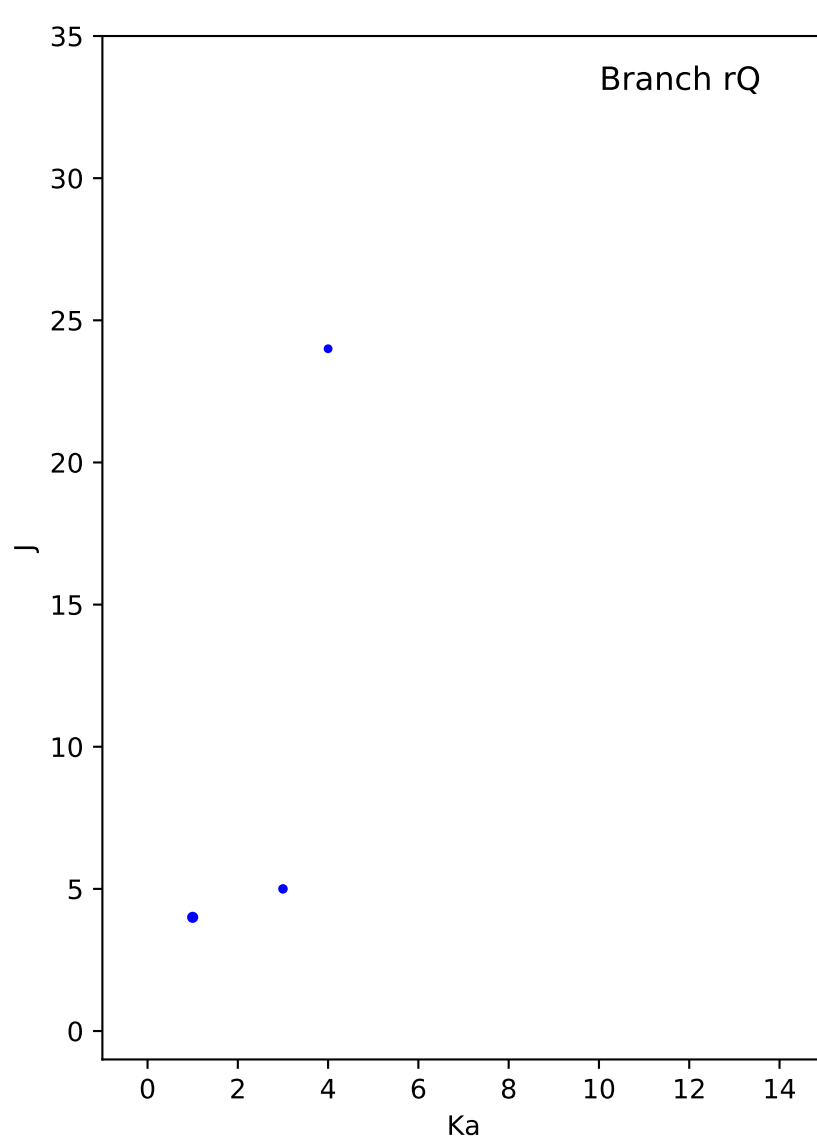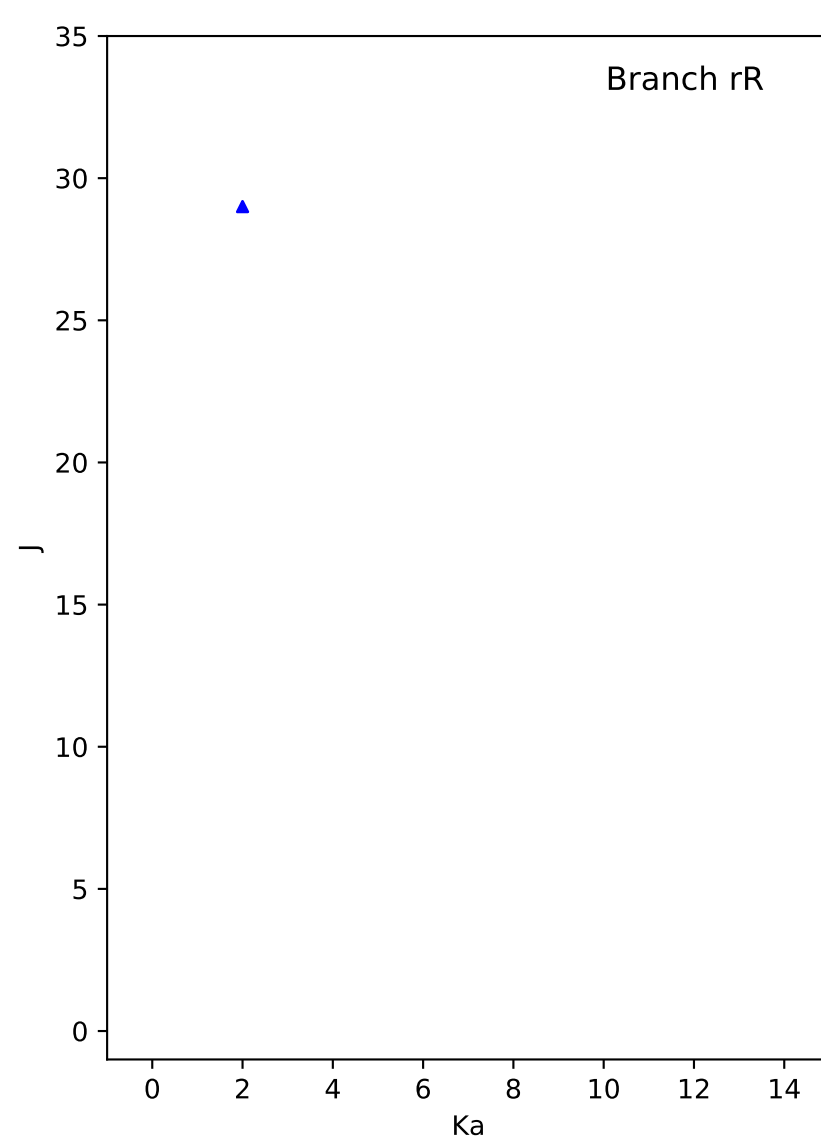

Obs-Calc Error(blended) distribution of the trans-furfural Excited state  $\nu_6$ 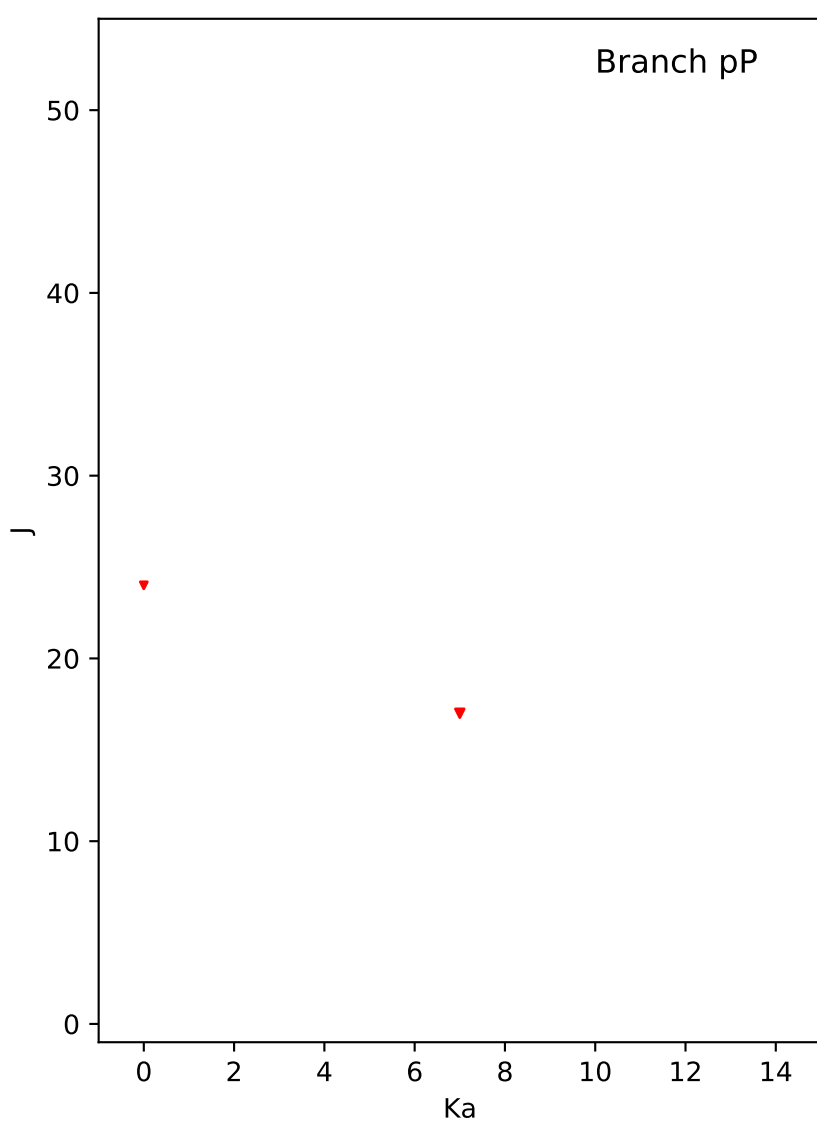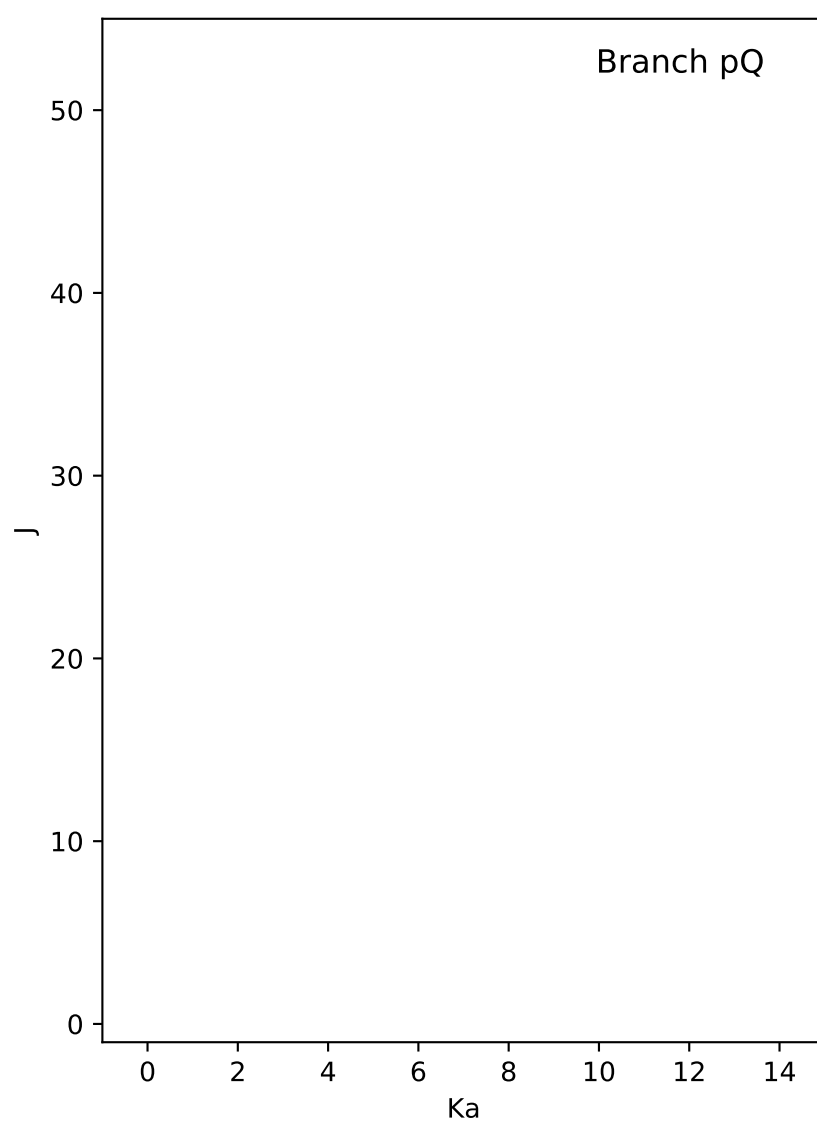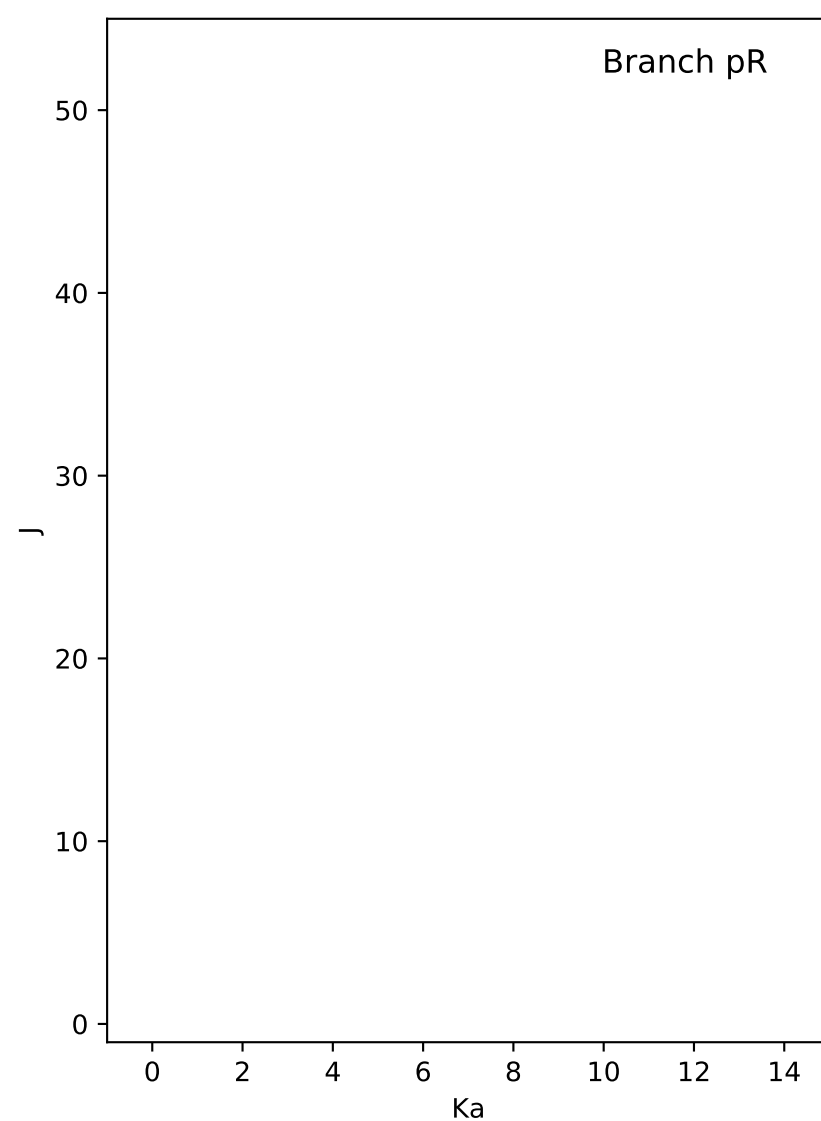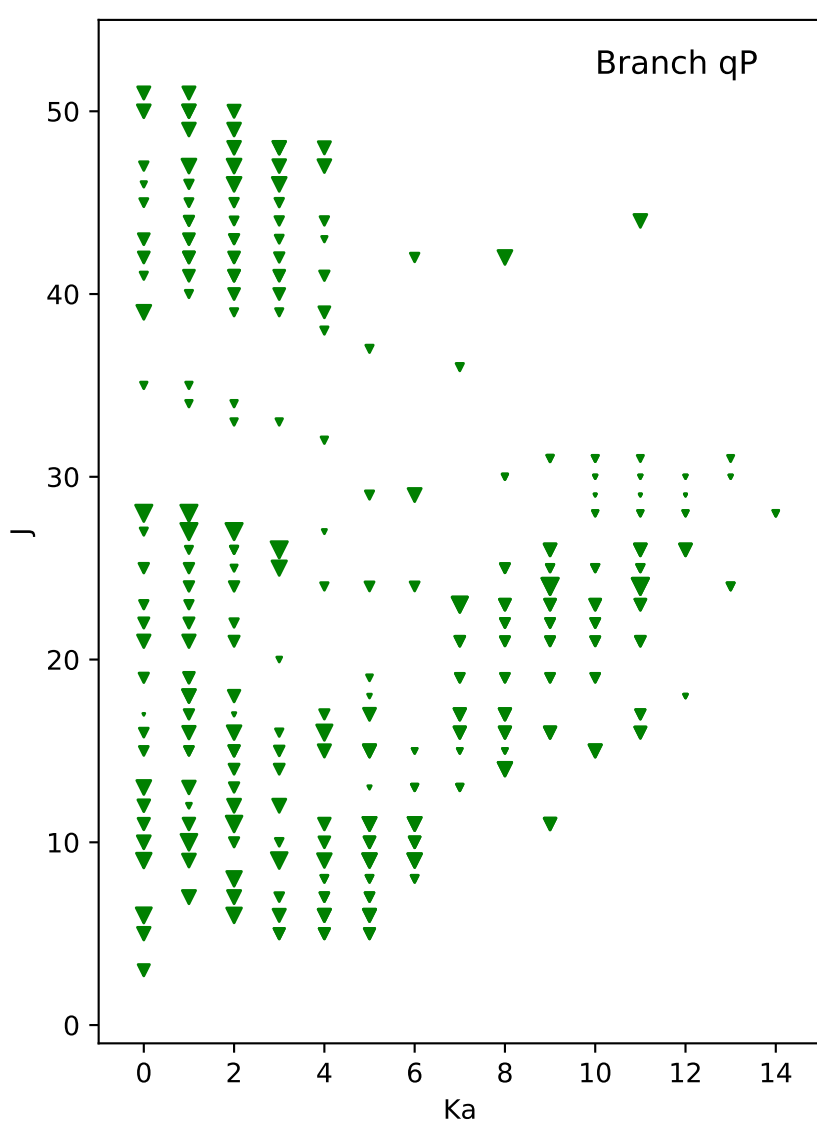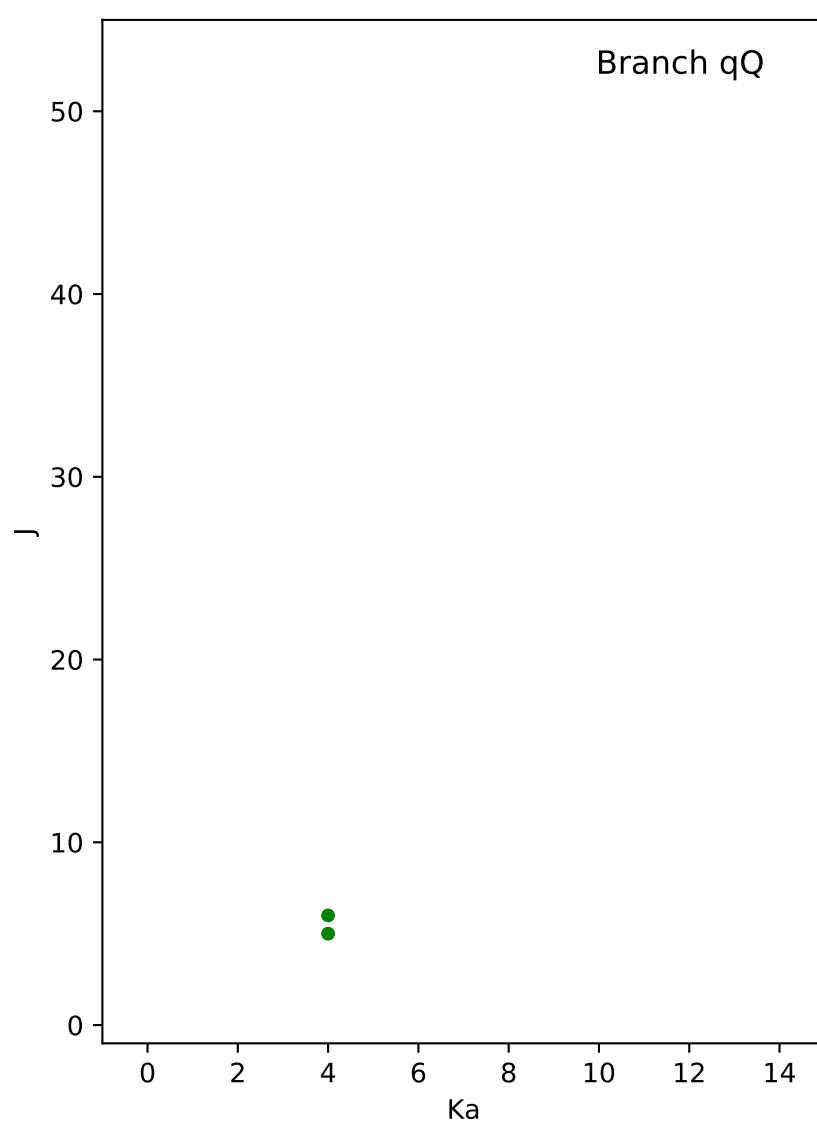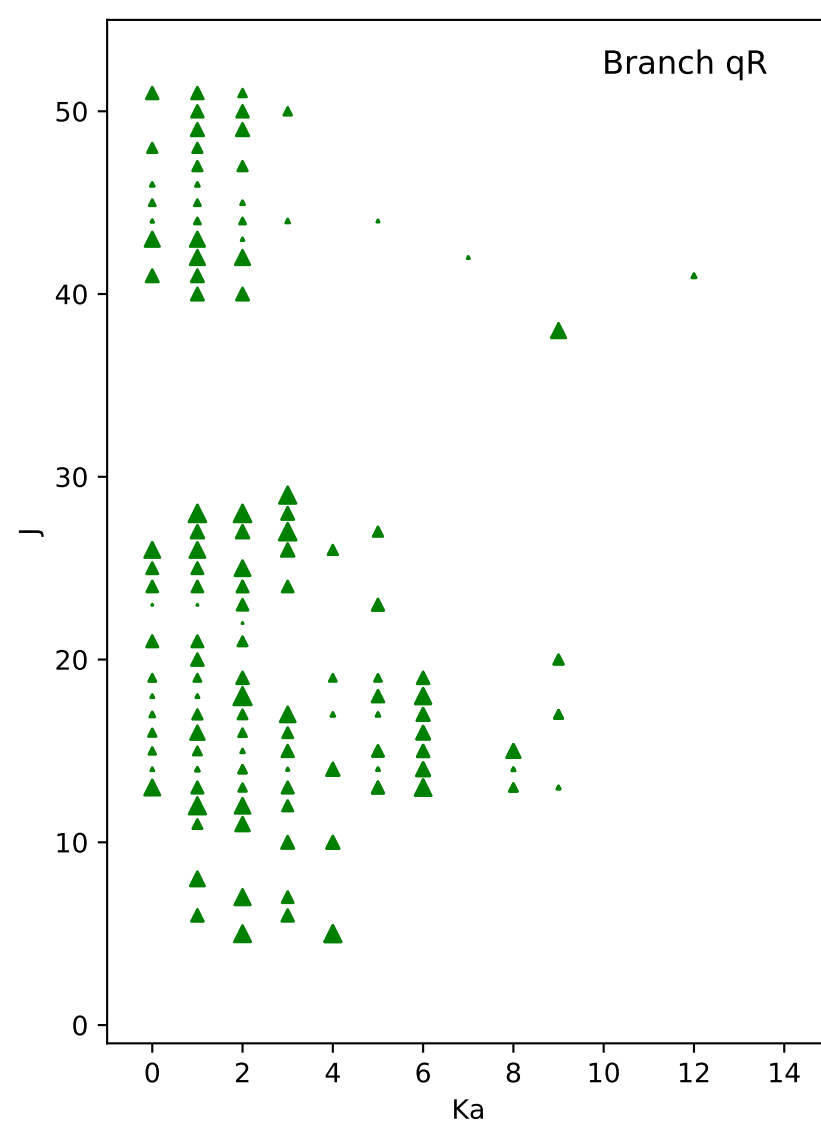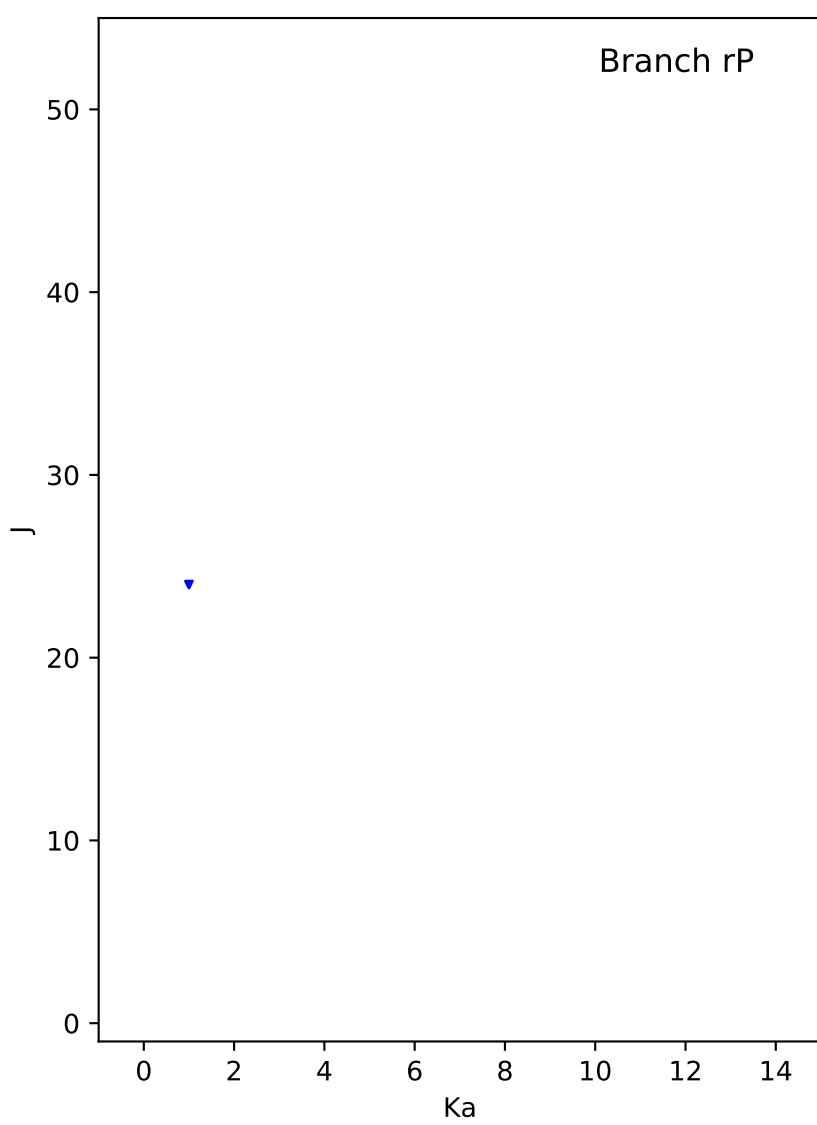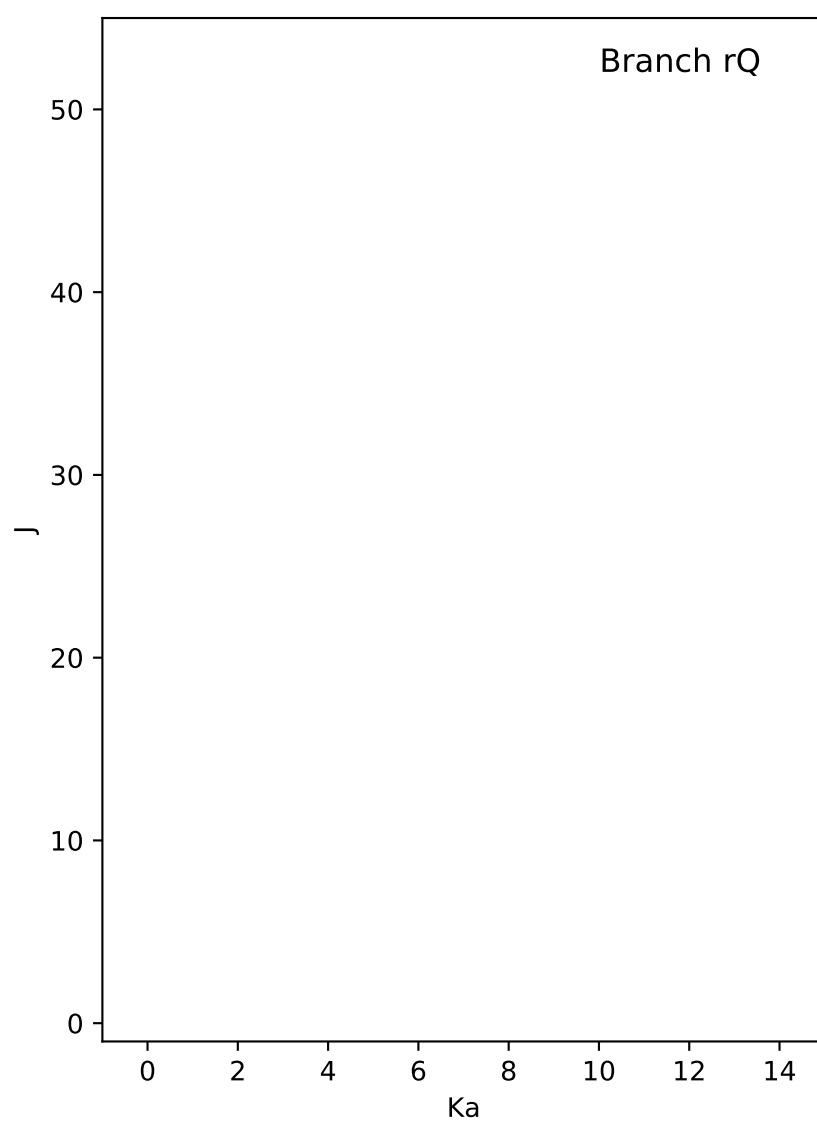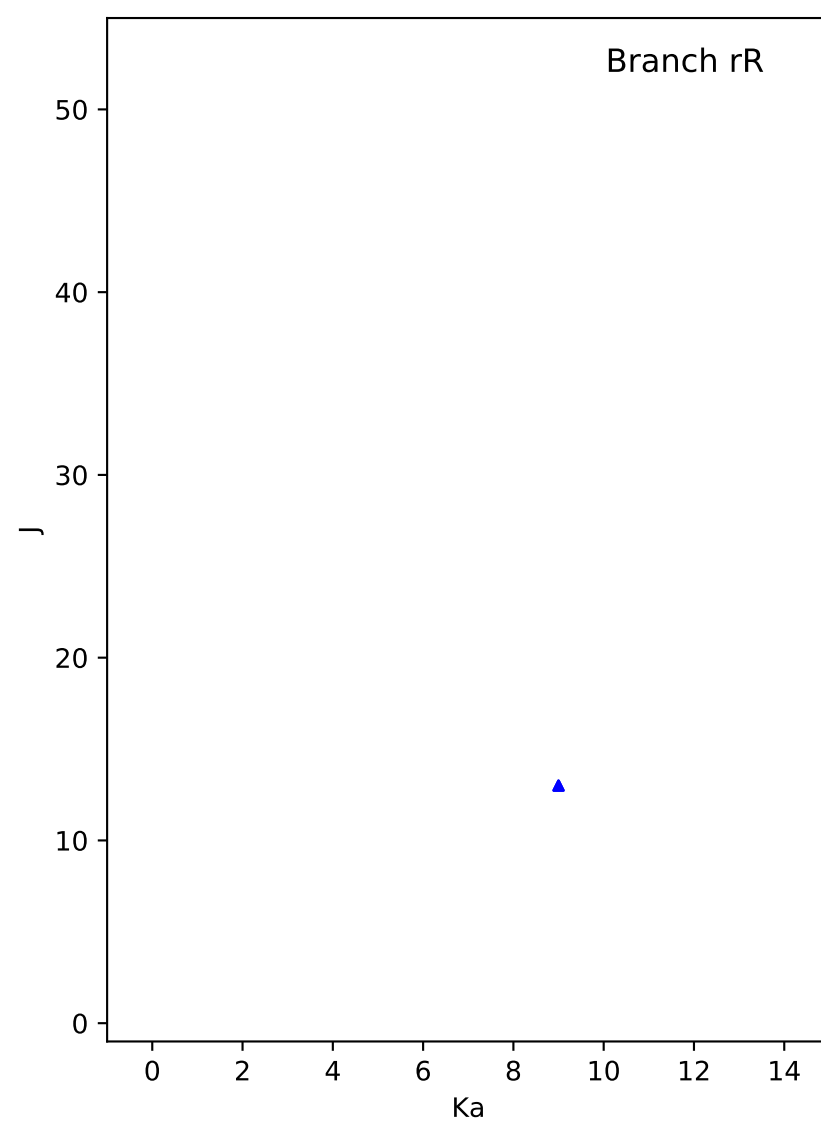

Obs-Calc Error(blended) distribution of the trans-furfural Excited state  $\nu_{17} + \nu_{15}$ 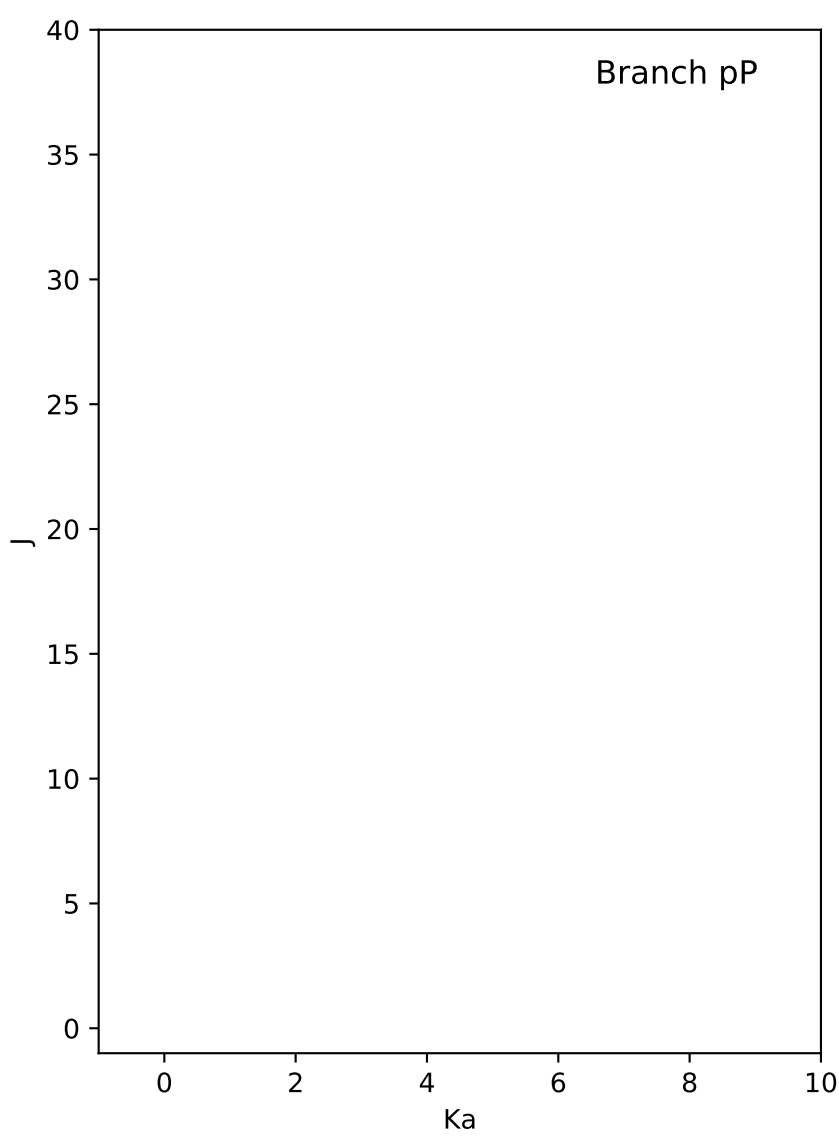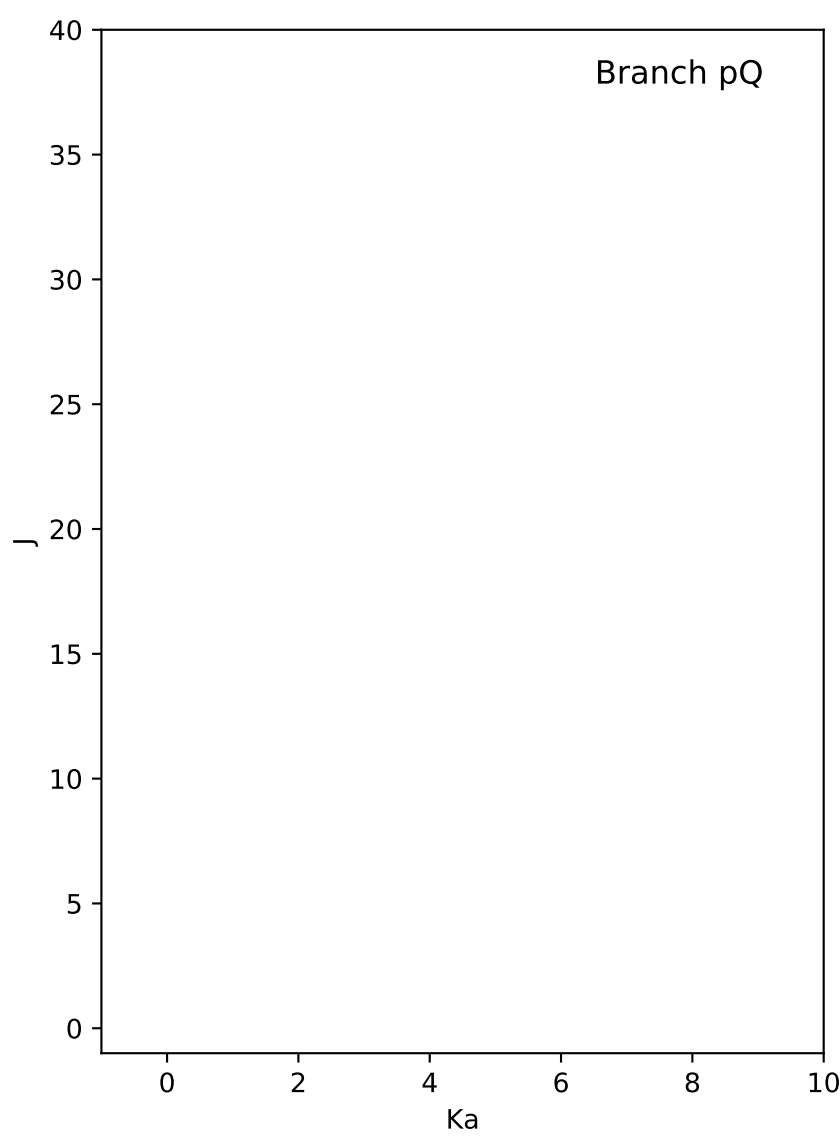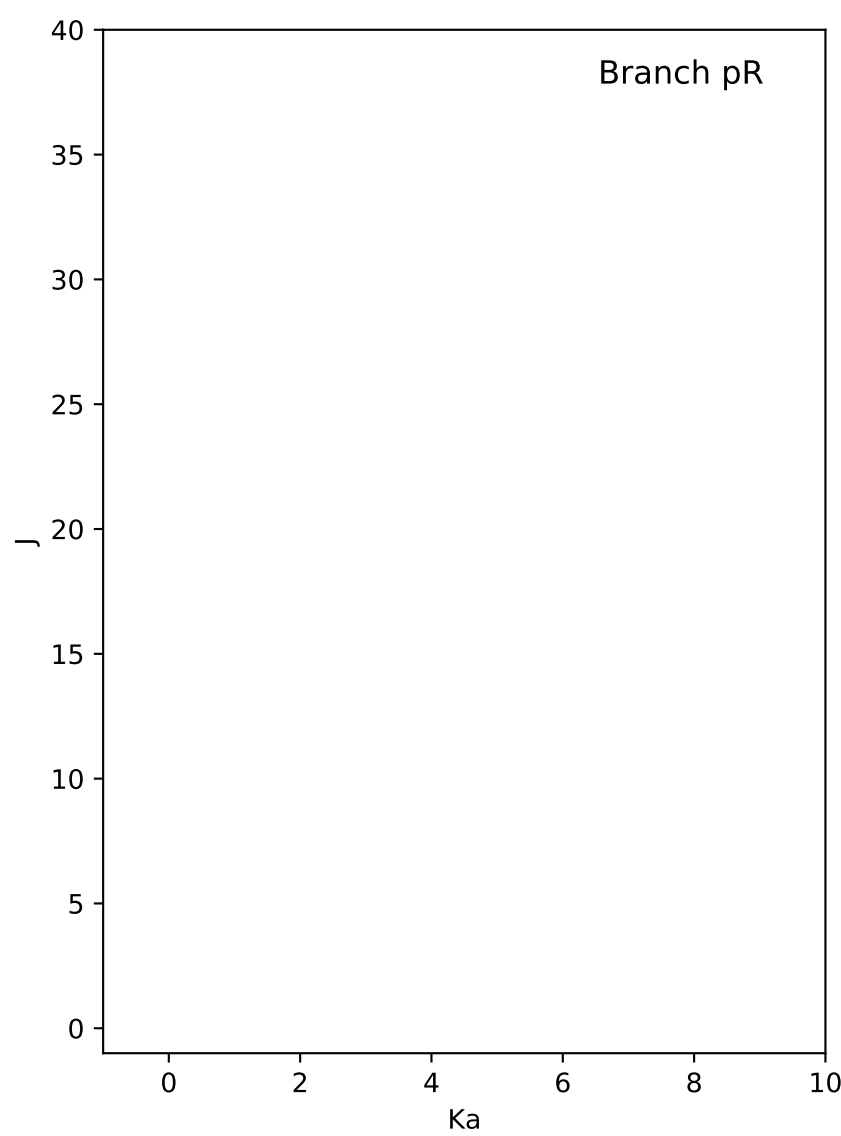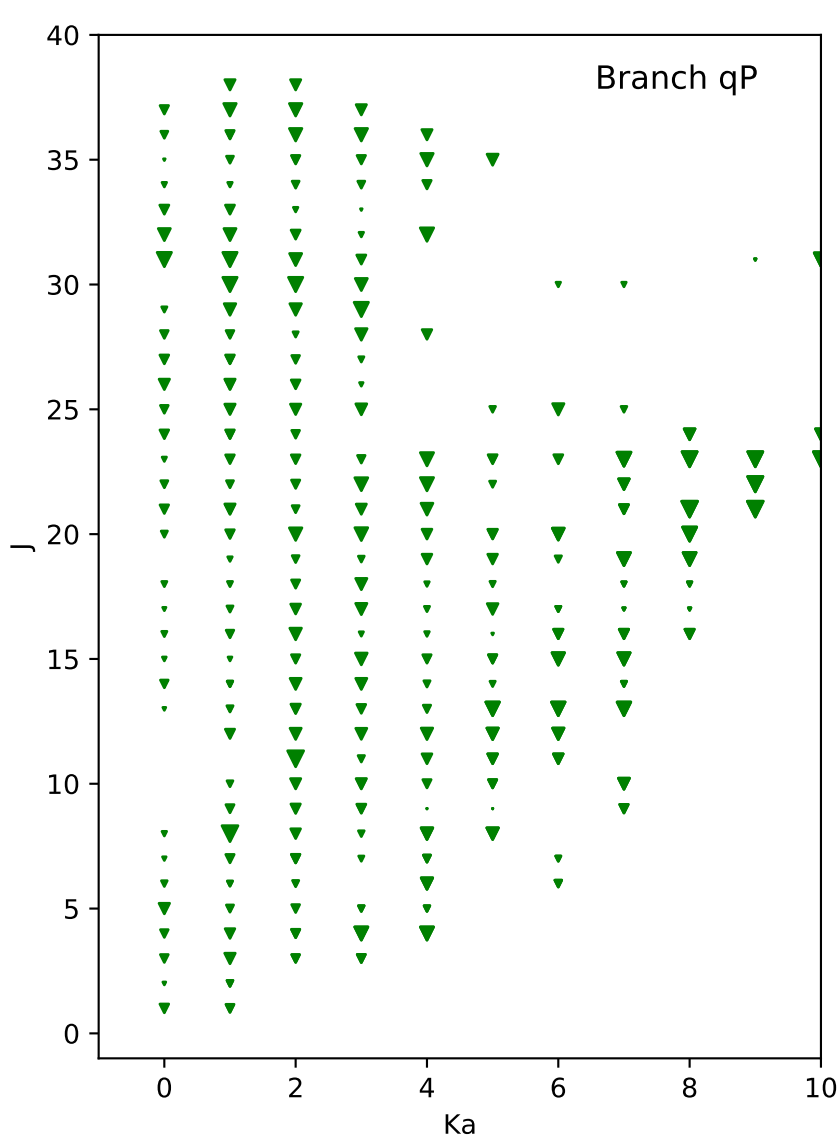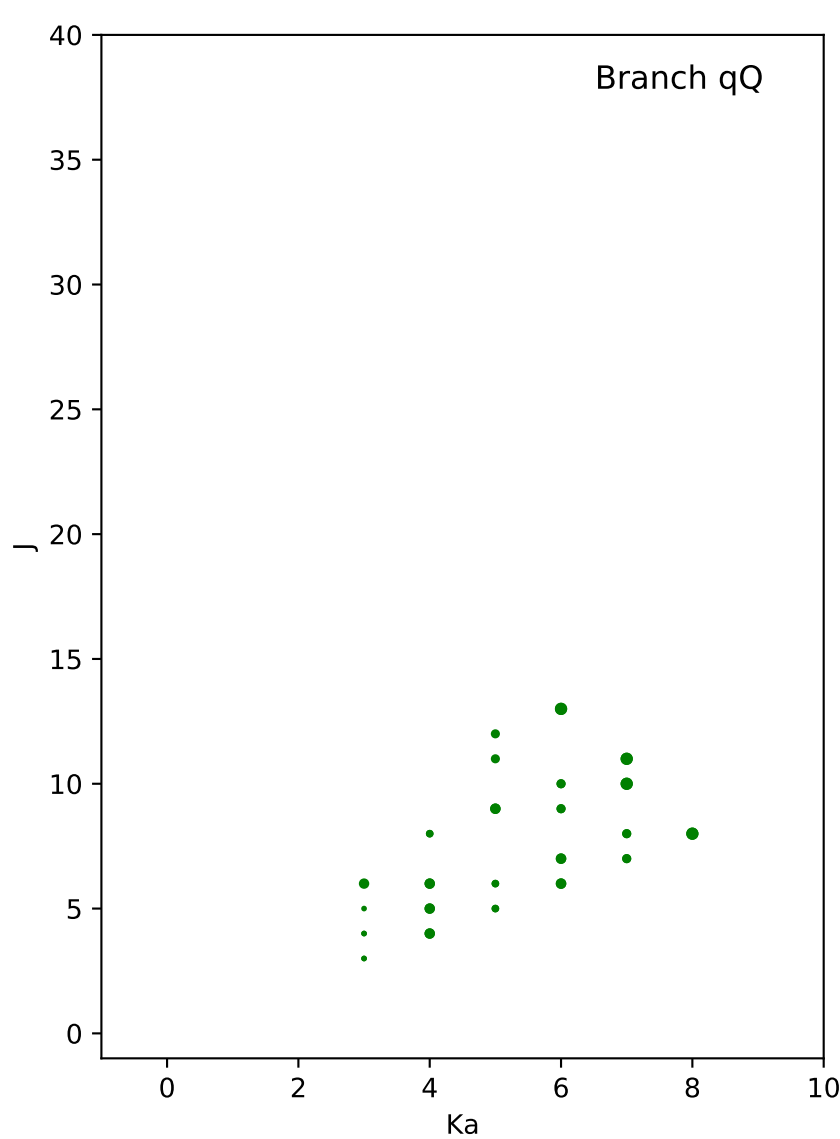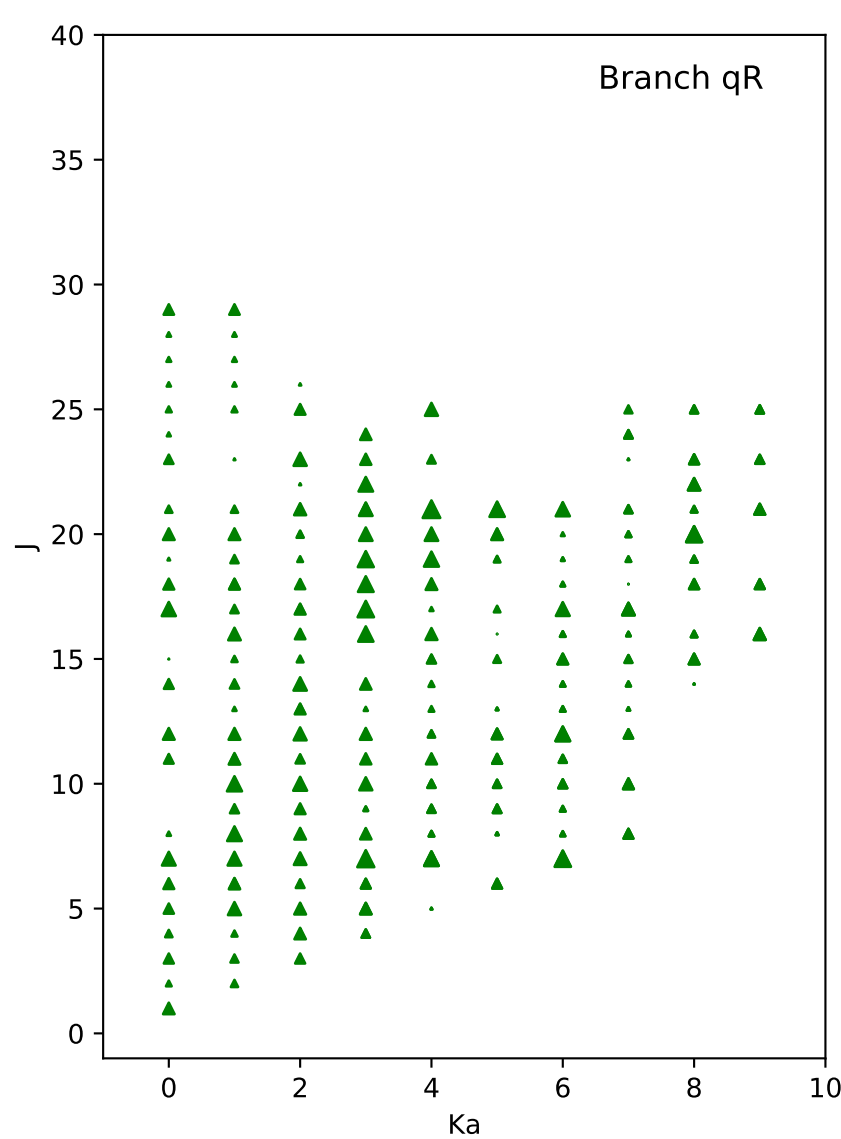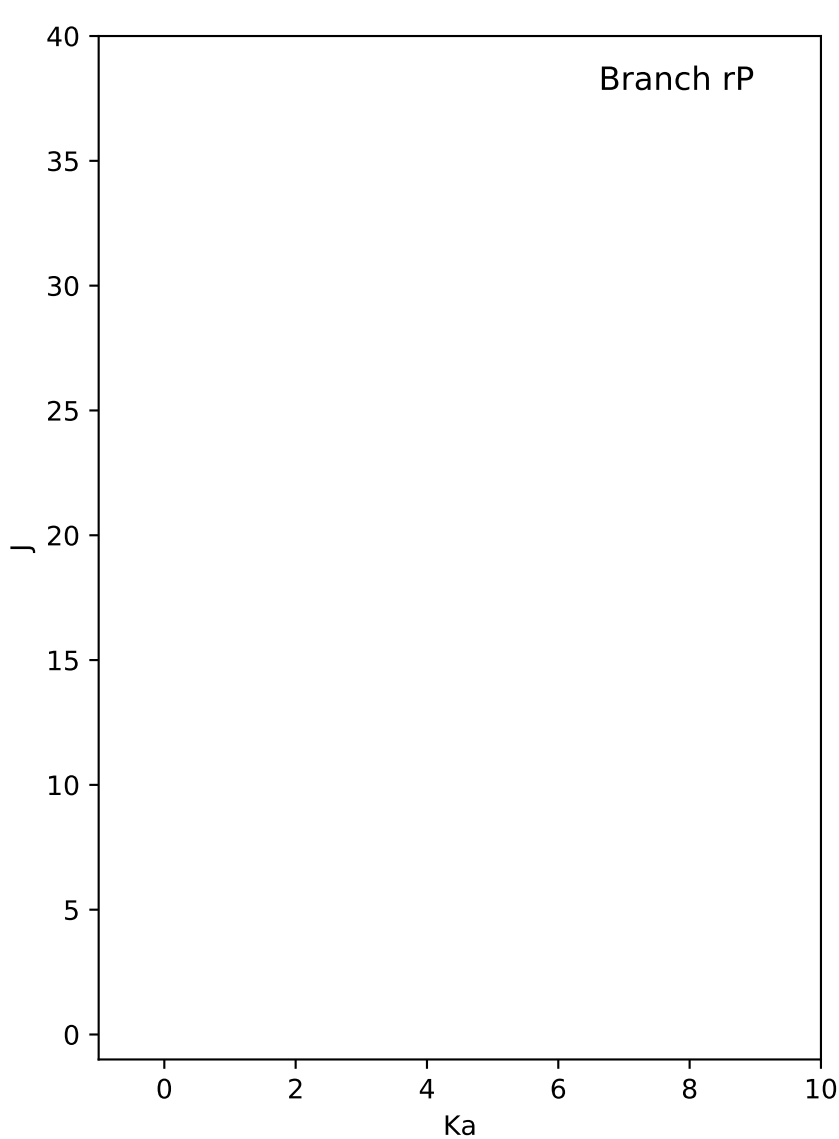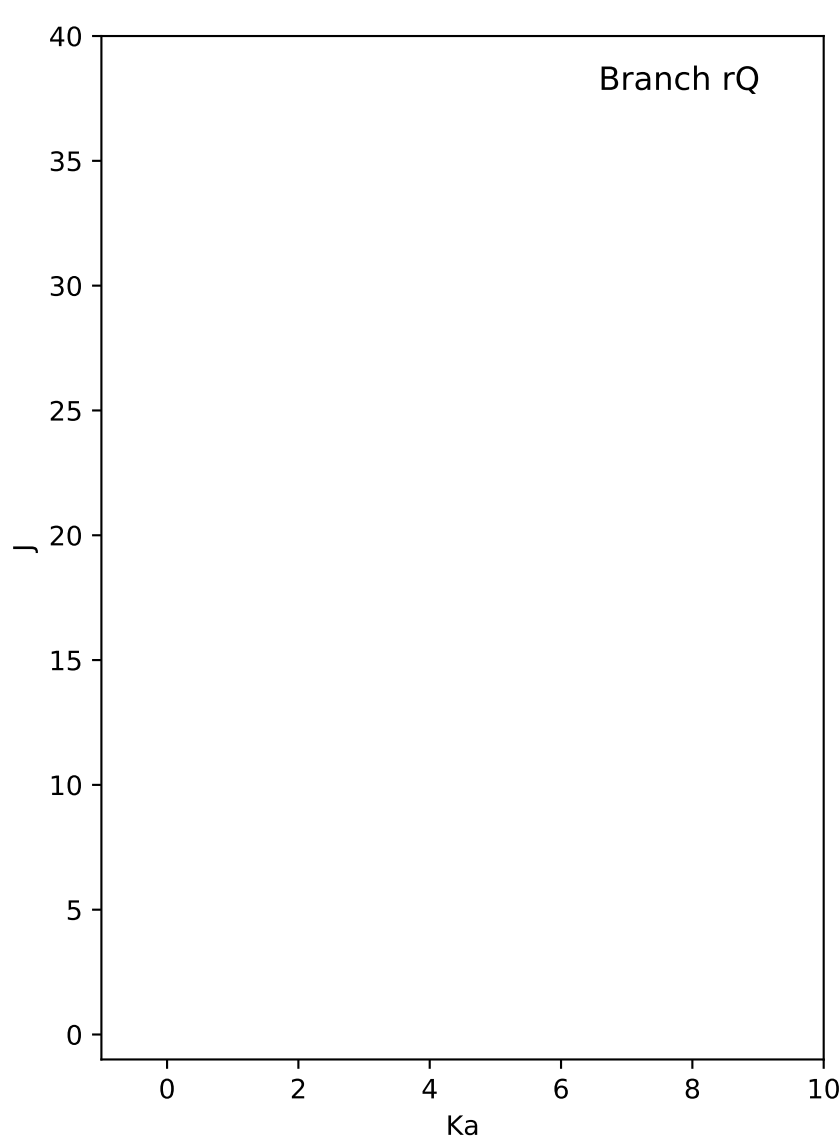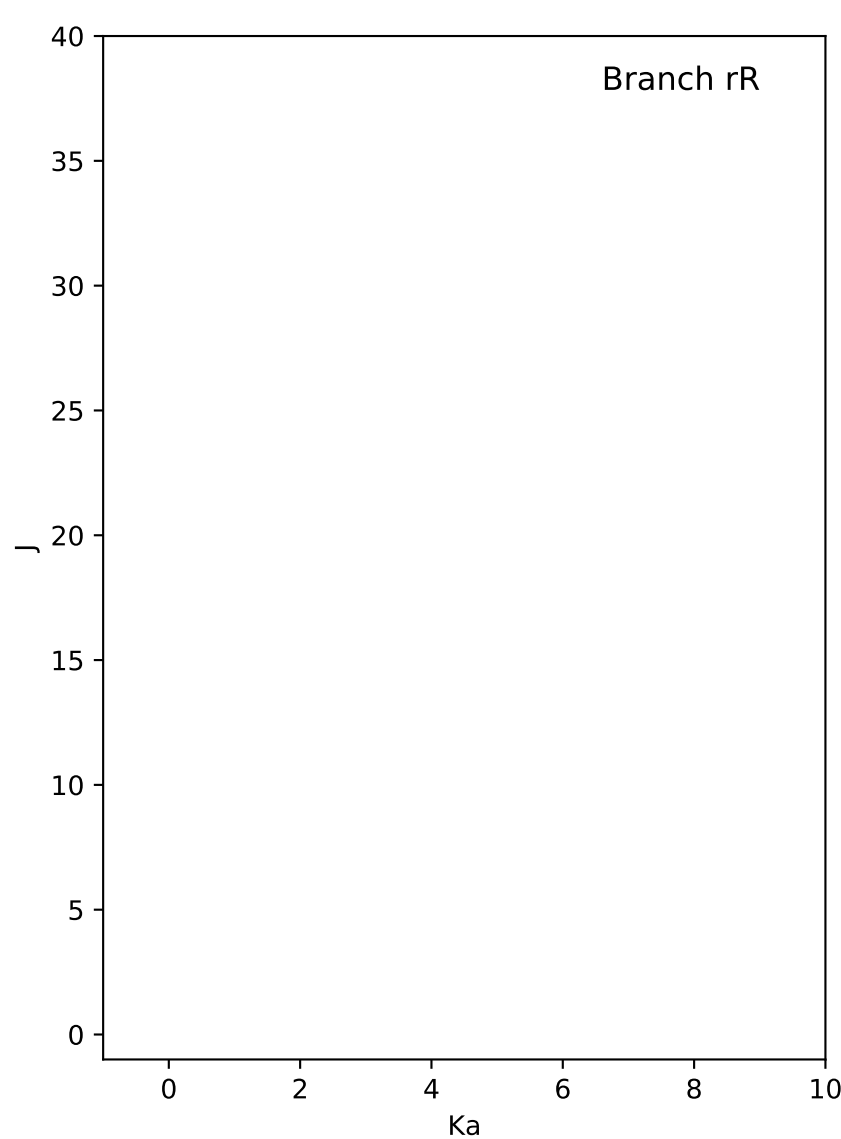

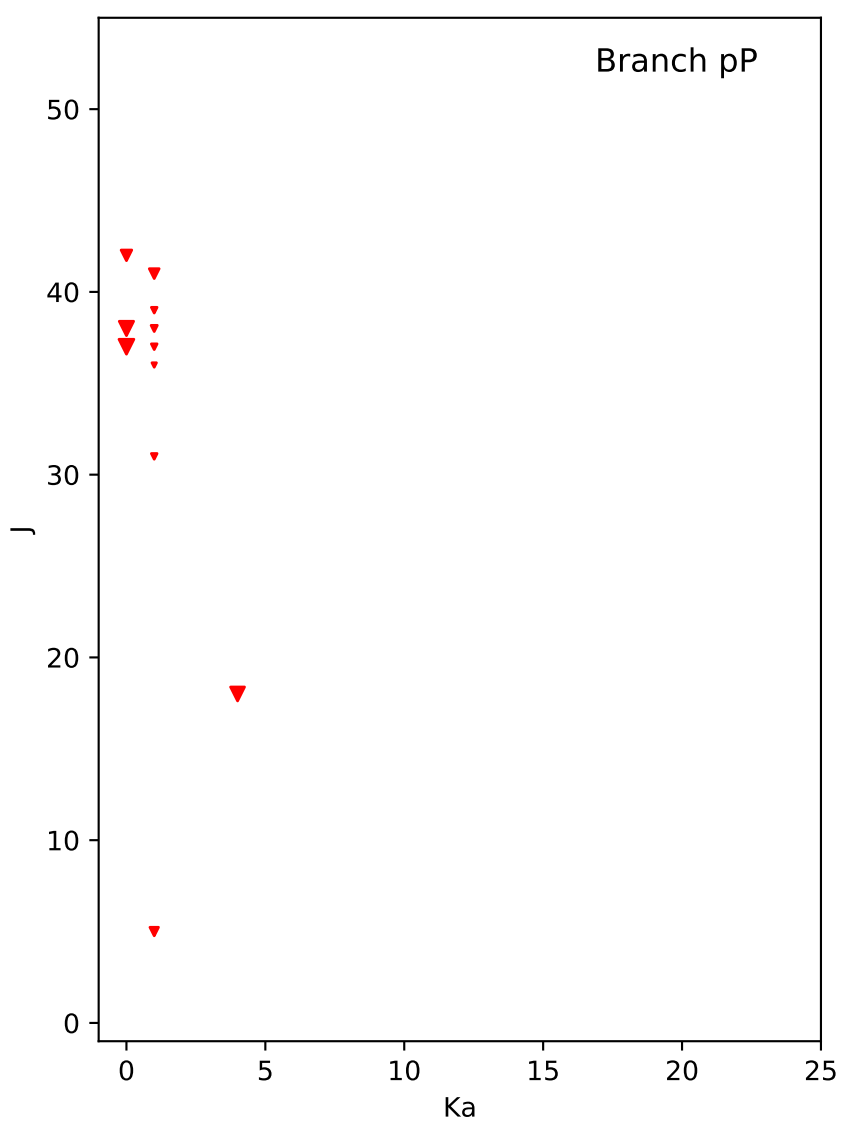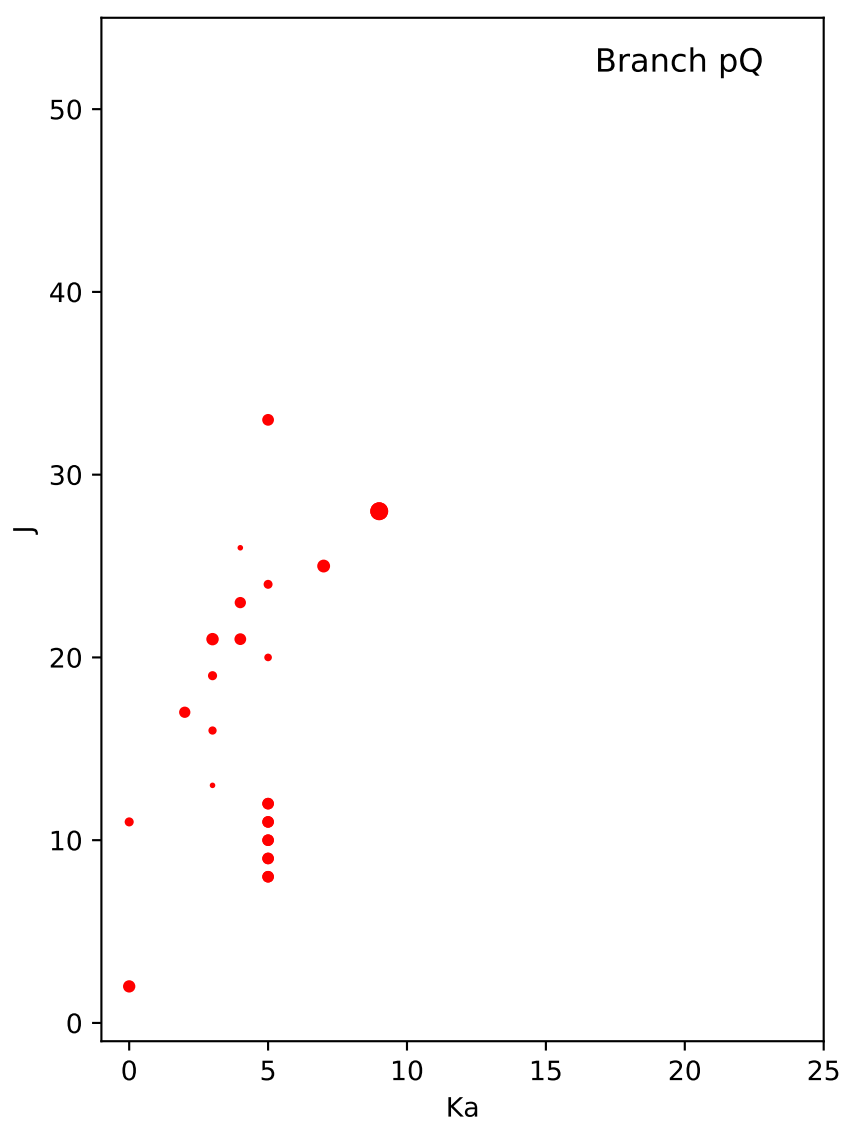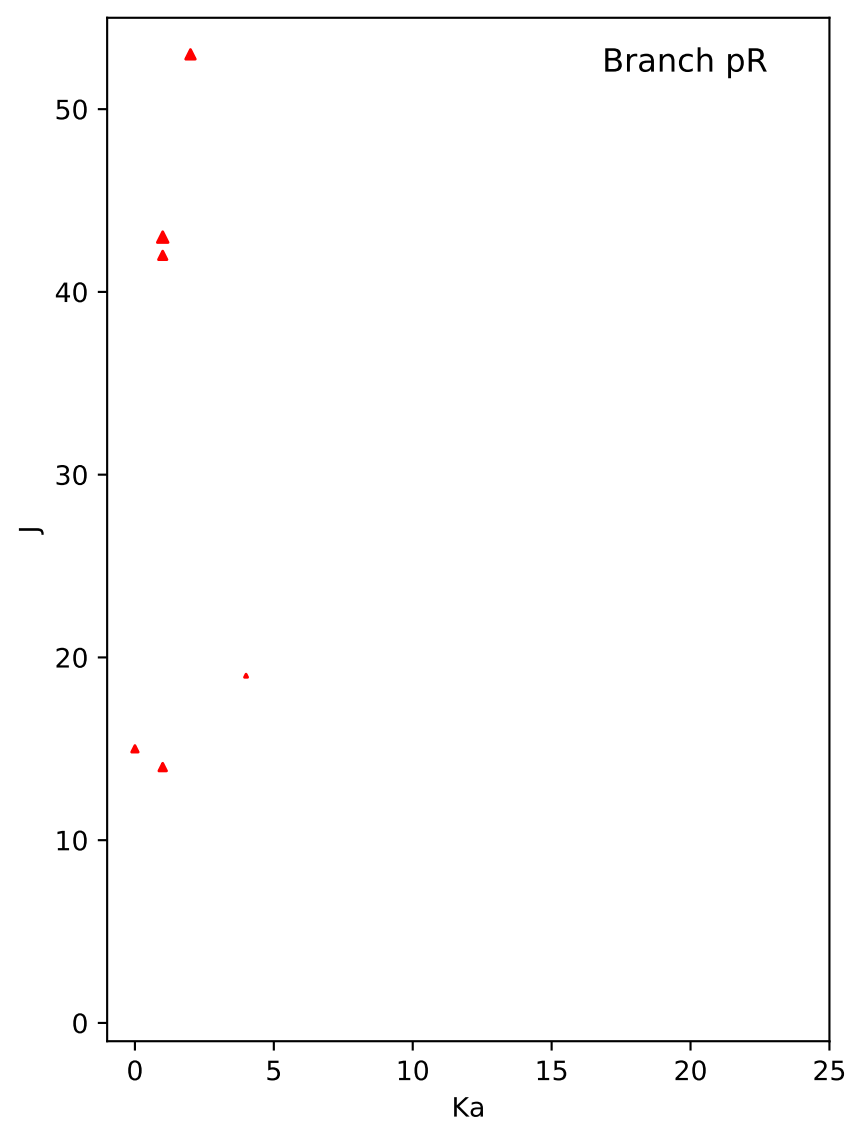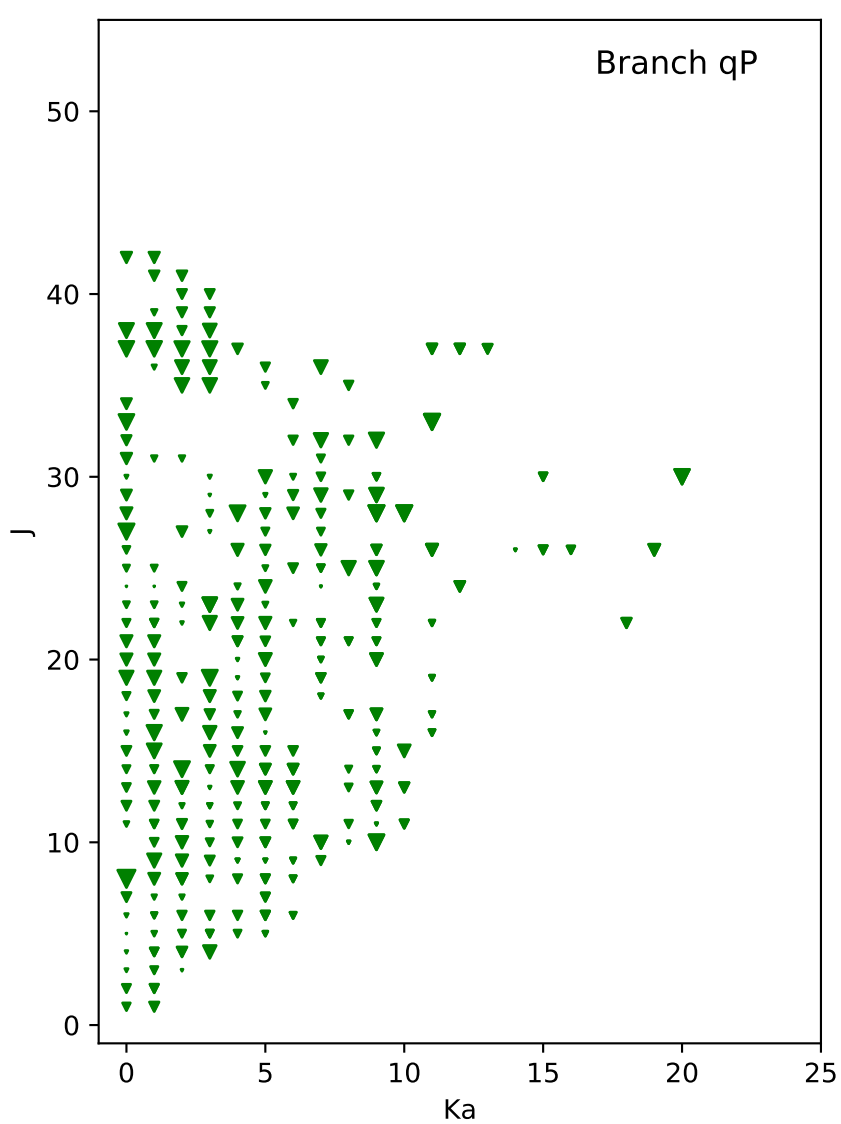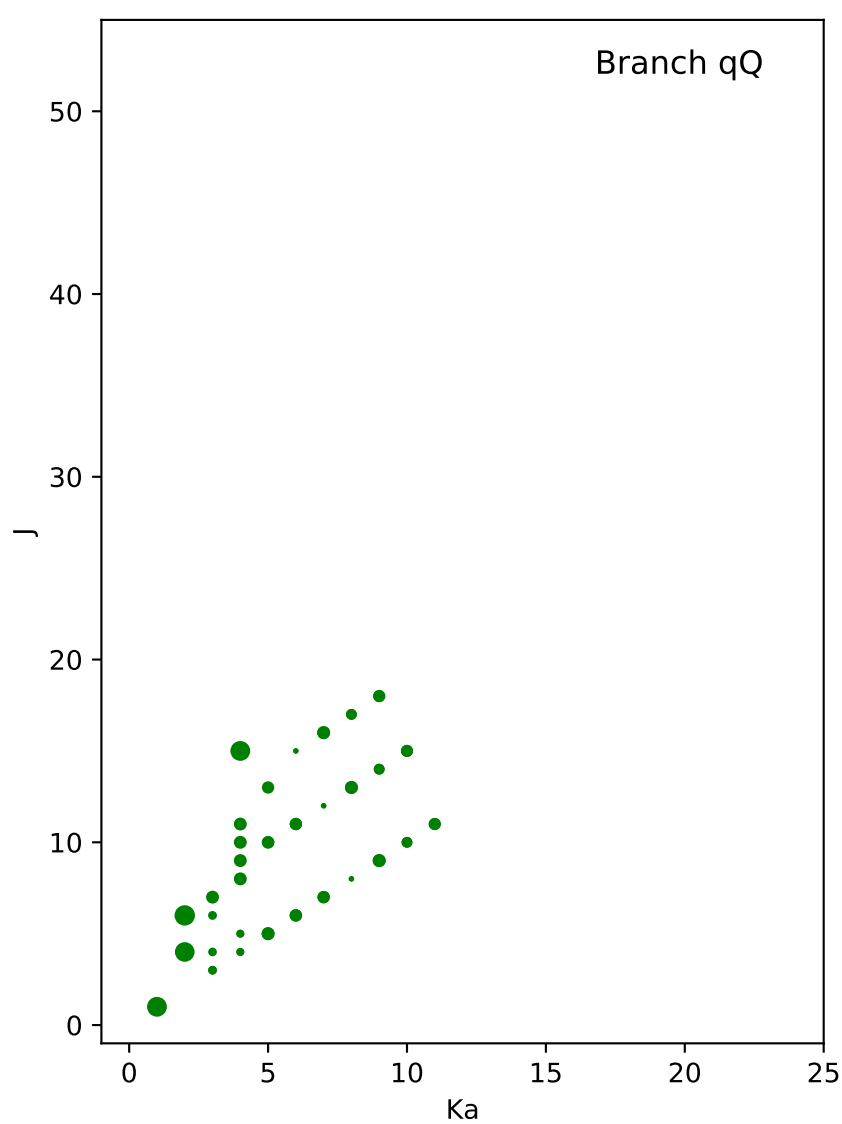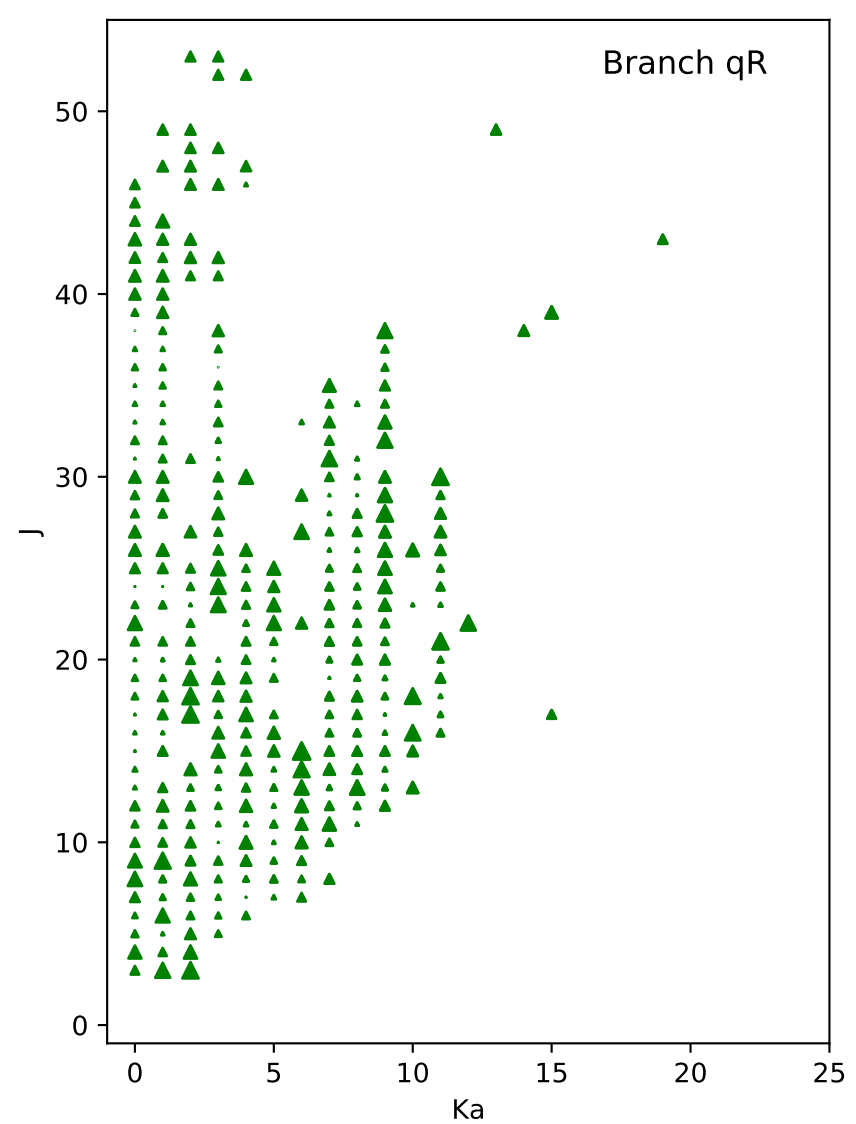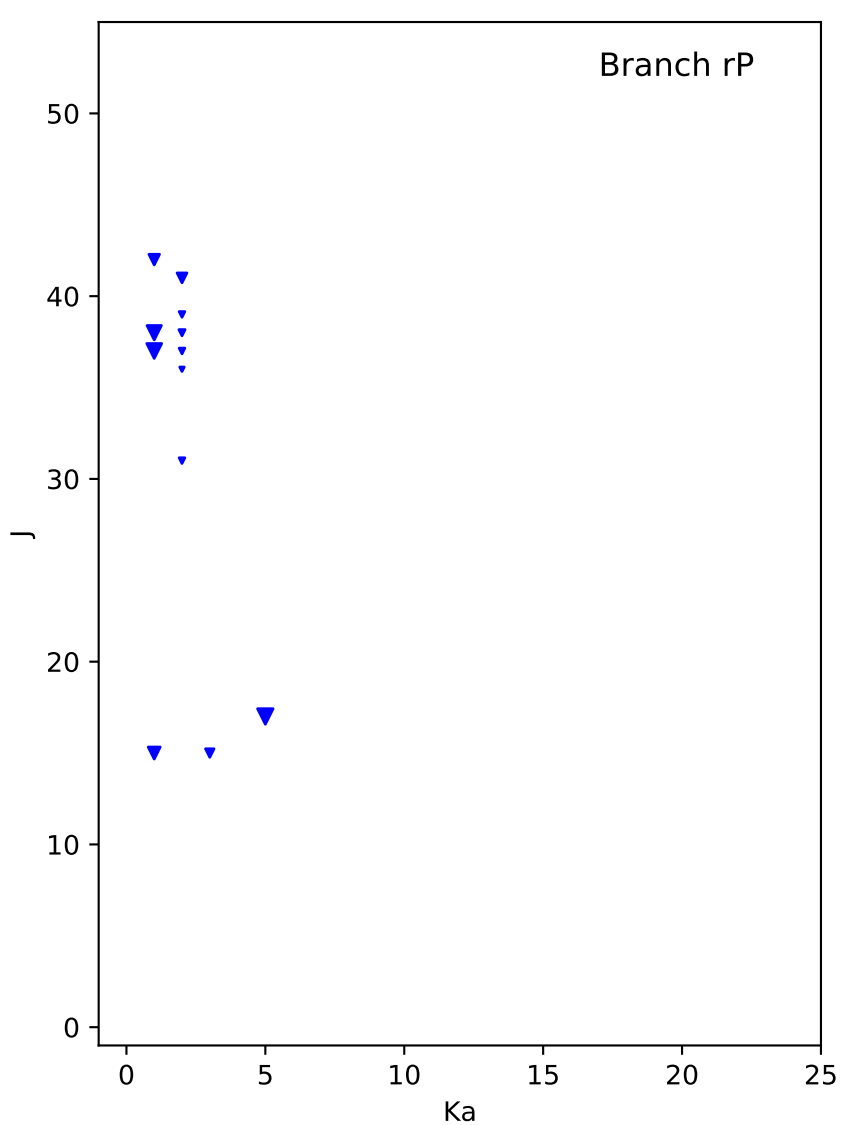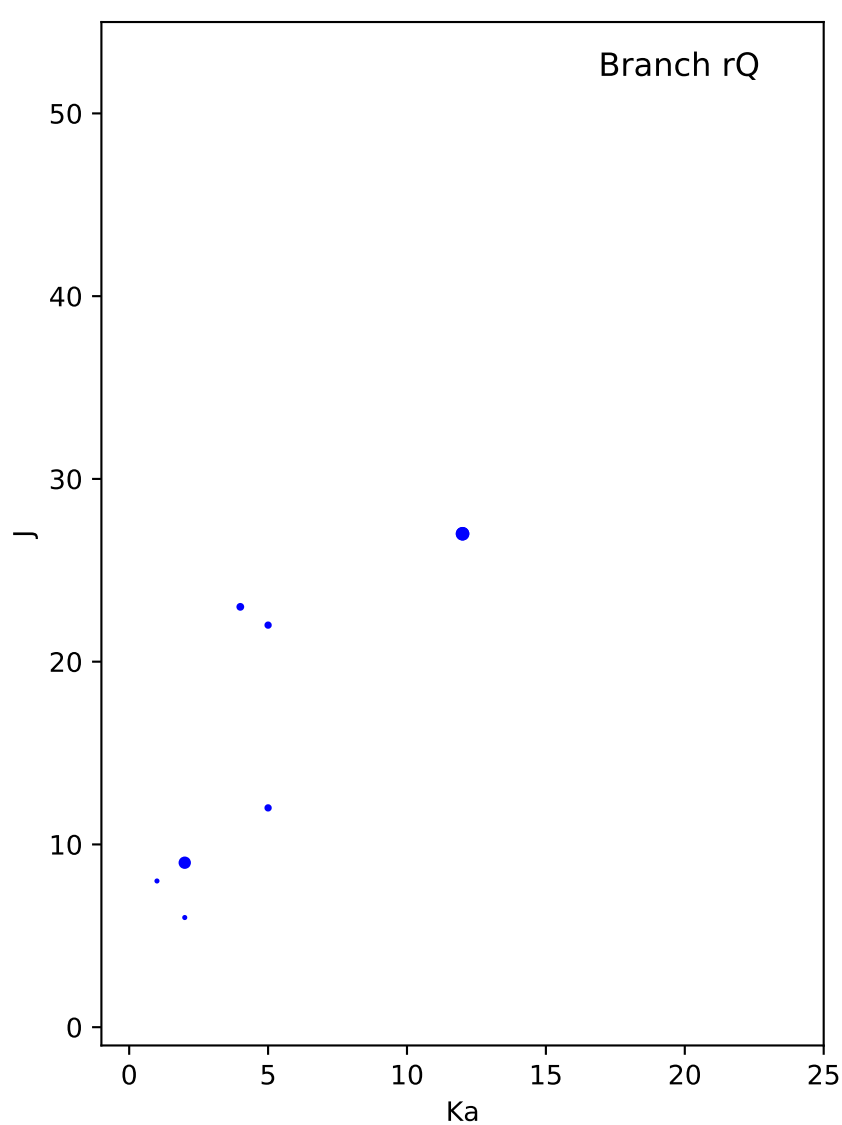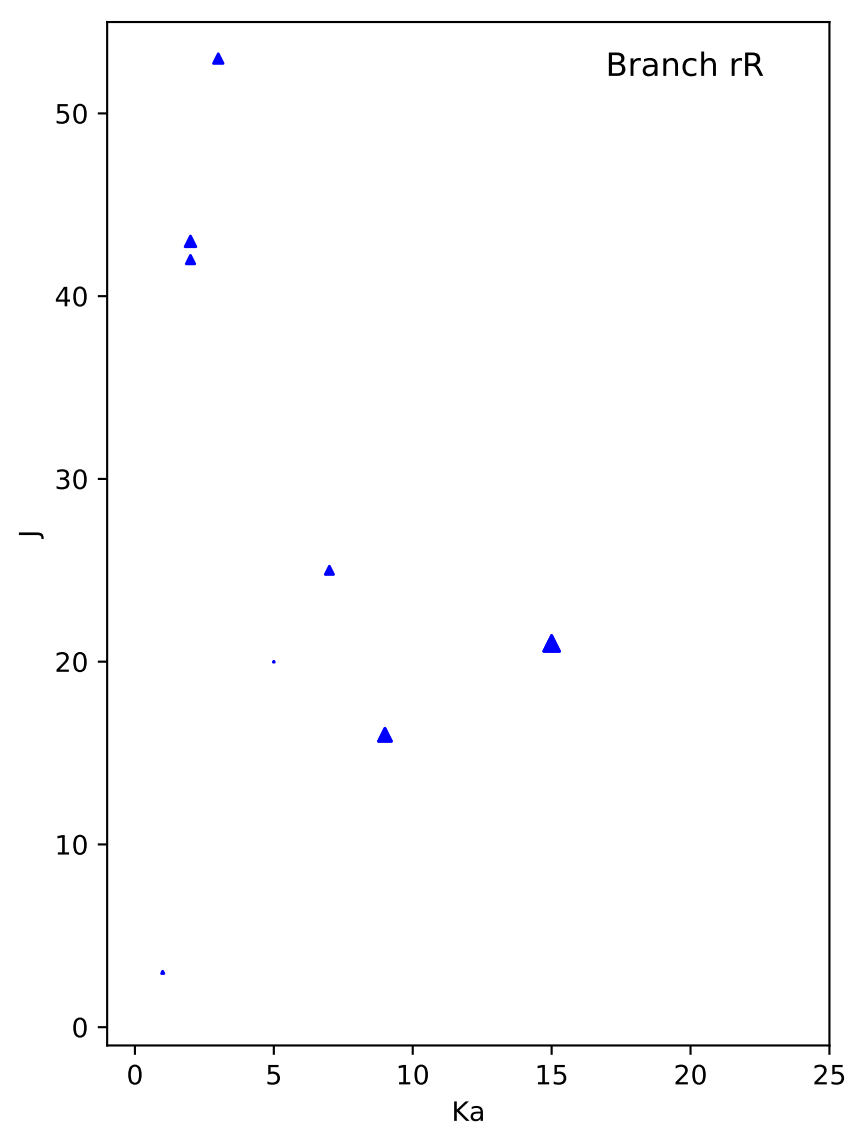

Supplement: s1 [file s1]
