# Supplementary material for: Rovibrational Spectroscopy of Trans and Cis Conformers of 2-Furfural from High-Resolution Fourier Transform and QCL Infrared Measurements
Source: MDPI journal article supplement (doi:10.3390/molecules28104165), 2023-05-18
Supplement: s1 [file s1]

# Rovibrational spectroscopy of trans- and cis- conformers of 2-furfural from high resolution Fourier transform and QCL infrared measurements

Sathapana Chawananon, Pierre Asselin, Jordan A. Claus, Manuel Goubet,  
Anthony Roucou, Robert Georges, Joanna Sobczuk, Colwyn Bracquart  
and Arnaud Cuisset

The compressed file supp-mat-furfural.rar contains two tables in the .txt format and a pdf file containing a series of 7 graphs representing the distribution of observed-calculated (O-C) errors per rotational branch (p,q,r) for  $\Delta(K_a) = -1, 0, 1$  and P,Q,R for  $\Delta(J) = -1, 0, 1$  as a function of  $K_a$  of all rovibrational lines of *trans*-2-FF assigned in the vibrational states  $v_{17} = 1, v_{23} = 1, v_{14} = 1, v_7 = 1, v_6 = 1, v_{17}, v_{15} = 1, 1$  and  $v_5 = 1$ .

| filename                                        | prefix | content                                                  |
|-------------------------------------------------|--------|----------------------------------------------------------|
| Table <i>Trans</i> -2-FF                        | S1     | linelist of GS and ES lines of <i>Trans</i> -2-FF        |
| Table <i>Cis</i> -2-FF                          | S2     | linelist of GS and ES lines of <i>Cis</i> -2-FF          |
| Graph O-C error distribution <i>Trans</i> -2-FF | G1     | O-C error distribution of ES lines of <i>Trans</i> -2-FF |
