# Supplementary material for: Rovibrational Spectroscopy of Trans and Cis Conformers of 2-Furfural from High-Resolution Fourier Transform and QCL Infrared Measurements
Source: Molecules. 2023 May 18;28(10):4165. doi: 10.3390/molecules28104165 (PMC10224235; doi:10.3390/molecules28104165)
Supplement: Supplementary file 1 [file molecules-28-04165-s001.zip]

Archive with 4 entries (4 files):
- Graph_G1_O-C_error_distribution_Trans-2-FF.pdf
- SuppMat-content.pdf
- SuppMat_TableS1.txt
- SuppMat_TableS2.txt
