# Supplementary material for: Rovibrational Spectroscopy of Trans and Cis Conformers of 2-Furfural from High-Resolution Fourier Transform and QCL Infrared Measurements
Source: Molecules. 2023 May 18;28(10):4165. doi: 10.3390/molecules28104165 (PMC10224235; doi:10.3390/molecules28104165)
Supplement: Supplementary file 1 [file molecules-28-04165-s001.zip › SuppMat_TableS1.txt]

           				Rovibrational spectroscopy of trans- and cis- conformers of 2-furfural
			        	from high resolution Fourier transform and QCL infrared measurements

			 	Sathapana Chawananon, Pierre Asselin, Jordan A. Claus, Manuel Goubet, Anthony Roucou,
 					Robert Georges, Joanna Sobczuk, Colwyn Bracquart and Arnaud Cuisset} 


Table S1 : Line list of the ground state rotational transitions of trans-2-furfural measured by Motiyenko et al., fitted
           globally with the rovibrational lines of vibrational states v17=1, v23=1, v14=1, v7=1, v6=1, (v18,v15) =1 and
           v5=1 measured in the present study. el" and el' are used as flags for the initial and final vibrational states 
           of the transitions (ground state:0, v17:1, v23:2, v14:3, v7:4, v6:5, v18,v15:6, v5:7)


--------------------------------------------------------------------------------------------------------------------------
         J'Ka'Kc'el' J" Ka"Kc"el"               Observed        Calc     Obs.-Calc. Exp.Error  Est.Error  Blend components
--------------------------------------------------------------------------------------------------------------------------
    1:   2  1  2  0  1  1  1  0                6957.48000    6957.47831    0.00169    0.02500   0.00004
    2:   2  0  2  0  1  0  1  0                7346.51100    7346.50615    0.00485    0.02500   0.00003
    3:   2  1  1  0  1  1  0  0                7774.96200    7774.96110    0.00090    0.02500   0.00004
    4:   3  1  3  0  2  1  2  0               10424.17510   10424.17291    0.00219    0.00200   0.00005
    5:   3  0  3  0  2  0  2  0               10970.76540   10970.76411    0.00129    0.00200   0.00004
    6:   3  2  2  0  2  2  1  0               11049.30930   11049.30867    0.00063    0.00200   0.00004
    7:   3  2  1  0  2  2  0  0               11127.87020   11127.87019    0.00001    0.00200   0.00004
    8:   6  1  5  0  6  0  6  0               11639.00440   11639.00453   -0.00013    0.00200   0.00048
    9:   3  1  2  0  2  1  1  0               11649.79960   11649.79810    0.00150    0.00200   0.00005
   10:   2  1  2  0  1  0  1  0               13103.32140   13103.32114    0.00026    0.00200   0.00031
   11:   5  0  5  0  4  1  4  0               13484.85070   13484.84839    0.00231    0.00200   0.00029
   12:   4  1  4  0  3  1  3  0               13877.23130   13877.23170   -0.00040    0.00200   0.00007
   13:   4  0  4  0  3  0  3  0               14537.96550   14537.96492    0.00058    0.00200   0.00006
   14:   4  2  3  0  3  2  2  0               14717.05580   14717.05454    0.00126    0.00200   0.00006
   15:   4  3  2  0  3  3  1  0               14770.07290   14770.07285    0.00005    0.00200   0.00006
   16:   4  3  1  0  3  3  0  0               14773.64120   14773.63878    0.00242    0.00200   0.00006
   17:   4  2  2  0  3  2  1  0               14911.49490   14911.49364    0.00126    0.00200   0.00006
   18:   4  1  3  0  3  1  2  0               15508.62180   15508.61928    0.00252    0.00200   0.00007
   19:   3  1  3  0  2  0  2  0               16180.98780   16180.98791   -0.00011    0.00200   0.00031
   20:   5  1  5  0  4  1  4  0               17313.42690   17313.42558    0.00132    0.00200   0.00009
   21:   4  2  2  0  4  1  3  0               17338.16100   17338.16221   -0.00121    0.00200   0.00091
   22:   6  0  6  0  5  1  5  0               17625.43180   17625.43260   -0.00080    0.00200   0.00027
   23:   3  2  1  0  3  1  2  0               17935.28790   17935.28785    0.00005    0.00200   0.00092
   24:   5  0  5  0  4  0  4  0               18034.33800   18034.33897   -0.00097    0.00200   0.00008
   25:   5  2  4  0  4  2  3  0               18371.67000   18371.67154   -0.00154    0.00200   0.00007
   26:   5  2  3  0  4  2  2  0               18752.71200   18752.71259   -0.00059    0.00200   0.00008
   27:   5  1  4  0  4  1  3  0               19344.66600   19344.66481    0.00119    0.00200   0.00008
   28:   6  1  6  0  5  1  5  0               20730.54800   20730.54670    0.00130    0.00200   0.00011
   29:   6  0  6  0  5  0  5  0               21454.01000   21454.00979    0.00021    0.00200   0.00010
   30:   6  2  5  0  5  2  4  0               22009.99000   22009.96363    0.02637    0.02500   0.00009
   31:   6  3  3  0  5  3  2  0               22223.94100   22223.94707   -0.00607    0.02500   0.00009
   32:   6  2  4  0  5  2  3  0               22654.00400   22653.98180    0.02220    0.02500   0.00010
   33:   6  1  5  0  5  1  4  0               23149.98400   23149.96018    0.02382    0.02500   0.00010
   34:  13  3 10  0 12  3  9  0               49495.65600   49495.65645   -0.00045    0.00500   0.00023
   35:  14  2 13  0 13  2 12  0               50233.99100   50233.99507   -0.00407    0.00500   0.00020
   36:  14  1 13  0 13  1 12  0               51360.69600   51360.69828   -0.00228    0.00500   0.00023
   37:  14 13  1  0 13 13  0  0               51658.29600   51658.29614   -0.00014    0.00500   0.00016
   38:  14 12  2  0 13 12  1  0               51668.23700   51668.23747   -0.00047    0.00500   0.00016
   39:  14 11  3  0 13 11  2  0               51680.84400   51680.84254    0.00146    0.00500   0.00016
   40:  14 10  4  0 13 10  3  0               51697.27200   51697.26757    0.00443    0.00500   0.00017
   41:  14  9  5  0 13  9  4  0               51719.36000   51719.36436   -0.00436    0.00500   0.00017
   42:  14  8  6  0 13  8  5  0               51750.25700   51750.25749   -0.00049    0.00500   0.00017
   43:  14  3 12  0 13  3 11  0               51792.95800   51792.95779    0.00021    0.00500   0.00018
   44:  14  7  8  0 13  7  7  0               51795.58200   51795.57756    0.00444    0.00500   0.00017   51795.58314   -0.00114 0.5000
   45:  14  7  7  0 13  7  6  0               51795.58200   51795.58872   -0.00672    0.00500   0.00017   51795.58314   -0.00114 0.5000
   46:  14  6  9  0 13  6  8  0               51866.22900   51866.20699    0.02201    0.01500   0.00017
   47:  14  6  8  0 13  6  7  0               51866.73700   51866.73707   -0.00007    0.00500   0.00017
   48:  14  5 10  0 13  5  9  0               51980.25000   51980.25040   -0.00040    0.00500   0.00018
   49:  14  5  9  0 13  5  8  0               51995.96100   51995.96206   -0.00106    0.00500   0.00018
   50:  14  4 11  0 13  4 10  0               52101.69800   52101.69754    0.00046    0.00500   0.00018
   51:  14  4 10  0 13  4  9  0               52362.12700   52362.12670    0.00030    0.00500   0.00020
   52:  14  3 11  0 13  3 10  0               53575.74900   53575.74731    0.00169    0.00500   0.00025
   53:  15  2 14  0 14  2 13  0               53636.99300   53636.99117    0.00183    0.00500   0.00021
   54:  15  1 14  0 14  1 13  0               54581.33600   54581.34209   -0.00609    0.00500   0.00025
   55:  15 14  1  0 14 14  0  0               55346.69600   55346.69021    0.00579    0.00500   0.00017
   56:  15 13  2  0 14 13  1  0               55356.48000   55356.47435    0.00565    0.00500   0.00017
   57:  15 12  3  0 14 12  2  0               55368.61200   55368.61635   -0.00435    0.00500   0.00017
   58:  15 11  4  0 14 11  3  0               55384.04700   55384.04331    0.00369    0.00500   0.00017
   59:  15 10  5  0 14 10  4  0               55404.18400   55404.17946    0.00454    0.00500   0.00017
   60:  15  3 13  0 14  3 12  0               55416.47900   55416.48078   -0.00178    0.00500   0.00018
   61:  15  9  6  0 14  9  5  0               55431.30500   55431.30772   -0.00272    0.00500   0.00018
   62:  15  8  7  0 14  8  6  0               55469.27800   55469.28590   -0.00790    0.00500   0.00018
   63:  15  7  9  0 14  7  8  0               55525.09400   55525.07682    0.01718    0.00500   0.00018   55525.09141    0.00259 0.5000
   64:  15  7  8  0 14  7  7  0               55525.09400   55525.10600   -0.01200    0.00500   0.00018   55525.09141    0.00259 0.5000
   65:  15  6 10  0 14  6  9  0               55612.02000   55612.00161    0.01839    0.01500   0.00018
   66:  15  6  9  0 14  6  8  0               55613.16000   55613.17127   -0.01127    0.01500   0.00018
   67:  15  5 11  0 14  5 10  0               55748.89200   55748.89361   -0.00161    0.00500   0.00019
   68:  15  5 10  0 14  5  9  0               55778.32700   55778.32521    0.00179    0.00500   0.00019
   69:  15  4 12  0 14  4 11  0               55864.40200   55864.40075    0.00125    0.00500   0.00019
   70:  15  4 11  0 14  4 10  0               56274.77800   56274.77693    0.00107    0.00500   0.00022
   71:  16  2 15  0 15  2 14  0               57015.49700   57015.49521    0.00179    0.00500   0.00023
   72:  17  1 17  0 16  1 16  0               57290.89400   57290.89288    0.00112    0.00500   0.00032
   73:  17  0 17  0 16  0 16  0               57324.48500   57324.48862   -0.00362    0.00500   0.00032
   74:  16  3 14  0 15  3 13  0               59010.30800   59010.30773    0.00027    0.00500   0.00019
   75:  16 15  1  0 15 15  0  0               59034.91800   59034.91657    0.00143    0.00500   0.00018
   76:  16 14  2  0 15 14  1  0               59044.58800   59044.58837   -0.00037    0.00500   0.00018
   77:  16 13  3  0 15 13  2  0               59056.37100   59056.37067    0.00033    0.00500   0.00018
   78:  16 12  4  0 15 12  3  0               59071.02000   59071.02273   -0.00273    0.00500   0.00018
   79:  16 11  5  0 15 11  4  0               59089.67300   59089.67113    0.00187    0.00500   0.00018
   80:  16 10  6  0 15 10  5  0               59114.04700   59114.04759   -0.00059    0.00500   0.00018
   81:  16  9  7  0 15  9  6  0               59146.93100   59146.93081    0.00019    0.00500   0.00018
   82:  16  8  9  0 15  8  8  0               59193.02600   59193.02388    0.00212    0.00500   0.00018   59193.02457    0.00143 0.5000
   83:  16  8  8  0 15  8  7  0               59193.02600   59193.02526    0.00074    0.00500   0.00018   59193.02457    0.00143 0.5000
   84:  16  7 10  0 15  7  9  0               59260.86500   59260.83151    0.03349    0.00500   0.00019   59260.86699   -0.00199 0.5000
   85:  16  7  9  0 15  7  8  0               59260.86500   59260.90248   -0.03748    0.00500   0.00019   59260.86699   -0.00199 0.5000
   86:  16  6 11  0 15  6 10  0               59366.33100   59366.32601    0.00499    0.00500   0.00019
   87:  16  6 10  0 15  6  9  0               59368.76200   59368.76109    0.00091    0.00500   0.00019
   88:  16  5 12  0 15  5 11  0               59526.75400   59526.75444   -0.00044    0.00500   0.00020
   89:  16  5 11  0 15  5 10  0               59579.32900   59579.33194   -0.00294    0.00500   0.00020
   90:  16  4 13  0 15  4 12  0               59621.72400   59621.72470   -0.00070    0.00500   0.00020
   91:  16  4 12  0 15  4 11  0               60240.78700   60240.78612    0.00088    0.00500   0.00024
   92:  17  2 16  0 16  2 15  0               60372.25800   60372.25839   -0.00039    0.00500   0.00024
   93:  18  1 18  0 17  1 17  0               60569.41300   60569.40871    0.00429    0.00500   0.00033
   94:  18  0 18  0 17  0 17  0               60591.88500   60591.88579   -0.00079    0.00500   0.00033
   95:  17  1 16  0 16  1 15  0               60968.15500   60968.15277    0.00223    0.00500   0.00028
   96:  16  2 14  0 15  2 13  0               61261.72800   61261.72708    0.00092    0.00500   0.00022
   97:  16  3 13  0 15  3 12  0               61728.54900   61728.55020   -0.00120    0.00500   0.00027
   98:  17  3 15  0 16  3 14  0               62572.39500   62572.39460    0.00040    0.00500   0.00020
   99:  17 16  1  0 16 16  0  0               62722.96300   62722.96035    0.00265    0.00500   0.00018
  100:  17 15  2  0 16 15  1  0               62732.55800   62732.55620    0.00180    0.00500   0.00018
  101:  17 14  3  0 16 14  2  0               62744.06100   62744.05859    0.00241    0.00500   0.00018
  102:  17 13  4  0 16 13  3  0               62758.10100   62758.10031    0.00069    0.00500   0.00018
  103:  17 12  5  0 16 12  4  0               62775.59100   62775.59304   -0.00204    0.00500   0.00018
  104:  17 11  6  0 16 11  5  0               62797.88900   62797.89016   -0.00116    0.00500   0.00018
  105:  17 10  7  0 16 10  6  0               62827.07500   62827.07367    0.00133    0.00500   0.00019
  106:  17  9  8  0 16  9  7  0               62866.49100   62866.48844    0.00256    0.00500   0.00019
  107:  17  8 10  0 16  8  9  0               62921.81100   62921.80736    0.00364    0.00500   0.00019   62921.80921    0.00179 0.5000
  108:  17  8  9  0 16  8  8  0               62921.81100   62921.81106   -0.00006    0.00500   0.00019   62921.80921    0.00179 0.5000
  109:  17  7 11  0 16  7 10  0               63003.31500   63003.29876    0.01624    0.01500   0.00020
  110:  17  7 10  0 16  7  9  0               63003.44800   63003.46102   -0.01302    0.01500   0.00020
  111:  17  6 12  0 16  6 11  0               63129.68200   63129.67887    0.00313    0.00500   0.00020
  112:  17  6 11  0 16  6 10  0               63134.49800   63134.49803   -0.00003    0.00500   0.00020
  113:  17  5 13  0 16  5 12  0               63312.92900   63312.92670    0.00230    0.00500   0.00021
  114:  17  4 14  0 16  4 13  0               63368.97300   63368.97045    0.00255    0.00500   0.00020
  115:  17  5 12  0 16  5 11  0               63402.96300   63402.96146    0.00154    0.00500   0.00021
  116:  18  2 17  0 17  2 16  0               63710.30200   63710.29843    0.00357    0.00500   0.00026
  117:  19  1 19  0 18  1 18  0               63846.32500   63846.32070    0.00430    0.00500   0.00034
  118:  19  0 19  0 18  0 18  0               63861.25100   63861.24620    0.00480    0.00500   0.00034
  119:  18  1 17  0 17  1 16  0               64163.19300   64163.19194    0.00106    0.00500   0.00029
  120:  17  4 13  0 16  4 12  0               64264.60200   64264.59952    0.00248    0.00500   0.00027
  121:  17  2 15  0 16  2 14  0               64757.57000   64757.57023   -0.00023    0.00500   0.00023
  122:  17  3 14  0 16  3 13  0               65752.32000   65752.32182   -0.00182    0.00500   0.00027
  123:  18  3 16  0 17  3 15  0               66101.59700   66101.59684    0.00016    0.00500   0.00021
  124:  18 17  1  0 17 17  0  0               66410.81000   66410.80728    0.00272    0.00500   0.00019
  125:  18 16  2  0 17 16  1  0               66420.35700   66420.35740   -0.00040    0.00500   0.00019
  126:  18 15  3  0 17 15  2  0               66431.64400   66431.64312    0.00088    0.00500   0.00019
  127:  18 14  4  0 17 14  3  0               66445.19700   66445.19963   -0.00263    0.00500   0.00019
  128:  18 13  5  0 17 13  4  0               66461.77600   66461.77879   -0.00279    0.00500   0.00019
  129:  18 12  6  0 17 12  5  0               66482.46900   66482.46422    0.00478    0.00500   0.00019
  130:  18 11  7  0 17 11  6  0               66508.86500   66508.86555   -0.00055    0.00500   0.00019
  131:  18 10  8  0 17 10  7  0               66543.45500   66543.46119   -0.00619    0.00500   0.00019
  132:  18  9  9  0 17  9  8  0               66590.24000   66590.23905    0.00095    0.00500   0.00019
  133:  18  8 11  0 17  8 10  0               66655.98100   66655.97797    0.00303    0.00500   0.00020   66655.98256   -0.00156 0.5000
  134:  18  8 10  0 17  8  9  0               66655.98100   66655.98715   -0.00615    0.00500   0.00020   66655.98256   -0.00156 0.5000
  135:  18  7 12  0 17  7 11  0               66752.96300   66752.94423    0.01877    0.01500   0.00020
  136:  18  7 11  0 17  7 10  0               66753.27400   66753.29571   -0.02171    0.01500   0.00020
  137:  18  6 13  0 17  6 12  0               66902.47300   66902.46909    0.00391    0.00500   0.00021
  138:  18  6 12  0 17  6 11  0               66911.59100   66911.58956    0.00144    0.00500   0.00021
  139:  19  2 18  0 18  2 17  0               67032.68300   67032.68432   -0.00132    0.00500   0.00027
  140:  18  4 15  0 17  4 14  0               67101.25400   67101.25237    0.00163    0.00500   0.00021
  141:  18  5 14  0 17  5 13  0               67105.88500   67105.88692   -0.00192    0.00500   0.00021
  142:  20  1 20  0 19  1 19  0               67122.12400   67122.12877   -0.00477    0.00500   0.00036
  143:  20  0 20  0 19  0 19  0               67131.97500   67131.97545   -0.00045    0.00500   0.00036
  144:  18  5 13  0 17  5 12  0               67254.25000   67254.25267   -0.00267    0.00500   0.00023
  145:  19  1 18  0 18  1 17  0               67369.01700   67369.01362    0.00338    0.00500   0.00030
  146:  18  2 16  0 17  2 15  0               68158.22100   68158.22111   -0.00011    0.00500   0.00025
  147:  19  3 17  0 18  3 16  0               69597.69500   69597.69532   -0.00032    0.00500   0.00022
  148:  18  3 15  0 17  3 14  0               69714.99400   69714.99148    0.00252    0.00500   0.00027
  149:  19 18  1  0 18 18  0  0               70098.44500   70098.44350    0.00150    0.00500   0.00020
  150:  19 17  2  0 18 17  1  0               70107.97400   70107.97355    0.00045    0.00500   0.00020
  151:  19 16  3  0 18 16  2  0               70119.10200   70119.09388    0.00812    0.00500   0.00019
  152:  19 15  4  0 18 15  3  0               70132.26800   70132.26288    0.00512    0.00500   0.00019
  153:  19 14  5  0 18 14  4  0               70148.11200   70148.11051    0.00149    0.00500   0.00019
  154:  19 13  6  0 18 13  5  0               70167.52900   70167.52202    0.00698    0.00500   0.00019
  155:  19 12  7  0 18 12  6  0               70191.77500   70191.77390    0.00110    0.00500   0.00019
  156:  19 11  8  0 18 11  7  0               70222.76600   70222.76359    0.00241    0.00500   0.00019
  157:  19 10  9  0 18 10  8  0               70263.41700   70263.41585    0.00115    0.00500   0.00020
  158:  19  9 10  0 18  9  9  0               70318.44700   70318.44550    0.00150    0.00500   0.00020
  159:  20  2 19  0 19  2 18  0               70342.35000   70342.35000    0.00000    0.00500   0.00028
  160:  19  8 12  0 18  8 11  0               70395.89800   70395.88654    0.01146    0.00500   0.00020   70395.89734    0.00066 0.5000
  161:  19  8 11  0 18  8 10  0               70395.89800   70395.90814   -0.01014    0.00500   0.00020   70395.89734    0.00066 0.5000
  162:  21  1 21  0 20  1 20  0               70397.18600   70397.18541    0.00059    0.00500   0.00037
  163:  21  0 21  0 20  0 20  0               70403.64700   70403.64456    0.00244    0.00500   0.00037
  164:  19  7 13  0 18  7 12  0               70510.25400   70510.23892    0.01508    0.01500   0.00021
  165:  19  7 12  0 18  7 11  0               70510.95400   70510.96498   -0.01098    0.01500   0.00021
  166:  20  1 19  0 19  1 18  0               70587.38000   70587.37792    0.00208    0.00500   0.00031
  167:  19  6 14  0 18  6 13  0               70684.97000   70684.96367    0.00633    0.00500   0.00022
  168:  19  6 13  0 18  6 12  0               70701.54900   70701.54872    0.00028    0.00500   0.00022
  169:  19  4 16  0 18  4 15  0               70813.76300   70813.76360   -0.00060    0.00500   0.00021
  170:  19  5 15  0 18  5 14  0               70903.42000   70903.42010   -0.00010    0.00500   0.00022
  171:  19  5 14  0 18  5 13  0               71139.36600   71139.36621   -0.00021    0.00500   0.00024
  172:  19  2 17  0 18  2 16  0               71470.44300   71470.44098    0.00202    0.00500   0.00028
  173:  19  4 15  0 18  4 14  0               72473.57600   72473.57339    0.00261    0.00500   0.00032
  174:  20  3 18  0 19  3 17  0               73061.38000   73061.37933    0.00067    0.00500   0.00023
  175:  19  3 16  0 18  3 15  0               73602.70900   73602.70896    0.00004    0.00500   0.00026
  176:  21  2 20  0 20  2 19  0               73641.95900   73641.95662    0.00238    0.00500   0.00030
  177:  22  1 22  0 21  1 21  0               73671.73500   73671.73438    0.00062    0.00500   0.00038
  178:  22  0 22  0 21  0 21  0               73675.95100   73675.95013    0.00087    0.00500   0.00038
  179:  20 19  1  0 19 19  0  0               73785.85200   73785.85546   -0.00346    0.00500   0.00021
  180:  20 18  2  0 19 18  1  0               73795.38900   73795.38761    0.00139    0.00500   0.00020
  181:  20 17  3  0 19 17  2  0               73806.38600   73806.38500    0.00100    0.00500   0.00020
  182:  21  1 20  0 20  1 19  0               73817.65100   73817.65477   -0.00377    0.00500   0.00031
  183:  20 16  4  0 19 16  3  0               73819.24100   73819.24452   -0.00352    0.00500   0.00020
  184:  20 15  5  0 19 15  4  0               73834.50000   73834.50120   -0.00120    0.00500   0.00019
  185:  20 14  6  0 19 14  5  0               73852.89000   73852.89051   -0.00051    0.00500   0.00019
  186:  20 13  7  0 19 13  6  0               73875.44200   73875.44638   -0.00438    0.00500   0.00019
  187:  20 12  8  0 19 12  7  0               73903.66000   73903.66049   -0.00049    0.00500   0.00019
  188:  20 11  9  0 19 11  8  0               73939.75300   73939.75199    0.00101    0.00500   0.00020
  189:  20 10 10  0 19 10  9  0               73987.14700   73987.14602    0.00098    0.00500   0.00020
  190:  20  9 12  0 19  9 11  0               74051.37200   74051.37492   -0.00292    0.00500   0.00020   74051.37550   -0.00350 0.5000
  191:  20  9 11  0 19  9 10  0               74051.37200   74051.37608   -0.00408    0.00500   0.00020   74051.37550   -0.00350 0.5000
  192:  20  8 13  0 19  8 12  0               74141.91500   74141.89402    0.02098    0.00500   0.00021   74141.91817   -0.00317 0.5000
  193:  20  8 12  0 19  8 11  0               74141.91500   74141.94231   -0.02731    0.00500   0.00021   74141.91817   -0.00317 0.5000
  194:  20  7 14  0 19  7 13  0               74275.66200   74275.65263    0.00937    0.00500   0.00021
  195:  20  7 13  0 19  7 12  0               74277.08500   74277.09029   -0.00529    0.00500   0.00021
  196:  20  6 15  0 19  6 14  0               74477.22000   74477.22021   -0.00021    0.00500   0.00022
  197:  20  4 17  0 19  4 16  0               74502.02800   74502.02786    0.00014    0.00500   0.00022
  198:  20  6 14  0 19  6 13  0               74506.30800   74506.30951   -0.00151    0.00500   0.00022
  199:  20  5 16  0 19  5 15  0               74702.59000   74702.59055   -0.00055    0.00500   0.00023
  200:  20  2 18  0 19  2 17  0               74709.05600   74709.05627   -0.00027    0.00500   0.00030
  201:  20  5 15  0 19  5 14  0               75065.41800   75065.41952   -0.00152    0.00500   0.00026
  202:  21  3 19  0 20  3 18  0               76494.17800   76494.17926   -0.00126    0.00500   0.00024
  203:  20  4 16  0 19  4 15  0               76632.11700   76632.11978   -0.00278    0.00500   0.00034
  204:  20  3 17  0 19  3 16  0               77404.69800   77404.69682    0.00118    0.00500   0.00026
  205:  21 20  1  0 20 20  0  0               77473.02600   77473.02980   -0.00380    0.00500   0.00022
  206:  21 19  2  0 20 19  1  0               77482.58100   77482.58353   -0.00253    0.00500   0.00021
  207:  21 18  3  0 20 18  2  0               77493.49600   77493.49378    0.00222    0.00500   0.00021
  208:  21 17  4  0 20 17  3  0               77506.10700   77506.10742   -0.00042    0.00500   0.00020
  209:  21 16  5  0 20 16  4  0               77520.88500   77520.88419    0.00081    0.00500   0.00020
  210:  21 15  6  0 20 15  5  0               77538.44700   77538.44400    0.00300    0.00500   0.00020
  211:  21 14  7  0 20 14  6  0               77559.64200   77559.63926    0.00274    0.00500   0.00019
  212:  21 13  8  0 20 13  7  0               77585.67000   77585.66880    0.00120    0.00500   0.00020
  213:  21 12  9  0 20 12  8  0               77618.26500   77618.26336    0.00164    0.00500   0.00020
  214:  21 11 10  0 20 11  9  0               77659.99700   77660.00018   -0.00318    0.00500   0.00020
  215:  21 10 11  0 20 10 10  0               77714.86500   77714.86323    0.00177    0.00500   0.00020
  216:  21  9 13  0 20  9 12  0               77789.30600   77789.30287    0.00313    0.00500   0.00021   77789.30426    0.00174 0.5000
  217:  21  9 12  0 20  9 11  0               77789.30600   77789.30566    0.00034    0.00500   0.00021   77789.30426    0.00174 0.5000
  218:  21  8 14  0 20  8 13  0               77894.42400   77894.37244    0.05156    0.00500   0.00021   77894.42408   -0.00008 0.5000
  219:  21  8 13  0 20  8 12  0               77894.42400   77894.47571   -0.05171    0.00500   0.00021   77894.42408   -0.00008 0.5000
  220:  21  2 19  0 20  2 18  0               77895.00000   77895.00181   -0.00181    0.00500   0.00032
  221:  21  7 15  0 20  7 14  0               78049.64600   78049.64240    0.00360    0.00500   0.00022
  222:  21  7 14  0 20  7 13  0               78052.38400   78052.38278    0.00122    0.00500   0.00022
  223:  21  4 18  0 20  4 17  0               78162.11800   78162.11724    0.00076    0.00500   0.00022
  224:  21  6 16  0 20  6 15  0               78279.00800   78279.00499    0.00301    0.00500   0.00023
  225:  21  6 15  0 20  6 14  0               78328.36900   78328.36866    0.00034    0.00500   0.00023
  226:  21  5 17  0 20  5 16  0               78499.77300   78499.77290    0.00010    0.00500   0.00023
  227:  21  5 16  0 20  5 15  0               79039.91100   79039.91156   -0.00056    0.00500   0.00028
  228:  22  3 20  0 21  3 19  0               79898.34600   79898.34623   -0.00023    0.00500   0.00025
  229:  21  4 17  0 20  4 16  0               80796.29700   80796.29836   -0.00136    0.00500   0.00036
  230:  22  2 20  0 21  2 19  0               81051.13100   81051.12749    0.00351    0.00500   0.00034
  231:  21  3 18  0 20  3 17  0               81112.09300   81112.08754    0.00546    0.00500   0.00026
  232:  22 21  1  0 21 21  0  0               81159.95500   81159.95334    0.00166    0.00500   0.00023
  233:  22 20  2  0 21 20  1  0               81169.55100   81169.54604    0.00496    0.00500   0.00022
  234:  22 19  3  0 21 19  2  0               81180.39900   81180.39979   -0.00079    0.00500   0.00021
  235:  22 18  4  0 21 18  3  0               81192.82500   81192.82032    0.00468    0.00500   0.00021
  236:  22 17  5  0 21 17  4  0               81207.20100   81207.20670   -0.00570    0.00500   0.00020
  237:  22 16  6  0 21 16  5  0               81224.08800   81224.08792    0.00008    0.00500   0.00020
  238:  22 15  7  0 21 15  6  0               81244.17900   81244.17747    0.00153    0.00500   0.00020
  239:  22 14  8  0 21 14  7  0               81268.45900   81268.45679    0.00221    0.00500   0.00020
  240:  22 13  9  0 21 13  8  0               81298.30800   81298.30689    0.00111    0.00500   0.00020
  241:  22 12 10  0 21 12  9  0               81335.72300   81335.72301   -0.00001    0.00500   0.00020
  242:  22 11 11  0 21 11 10  0               81383.68300   81383.67961    0.00339    0.00500   0.00020
  243:  22 10 12  0 21 10 11  0               81446.78300   81446.78287    0.00013    0.00500   0.00021
  244:  22  9 14  0 21  9 13  0               81532.51600   81532.51064    0.00536    0.00500   0.00021   81532.51384    0.00216 0.5000
  245:  22  9 13  0 21  9 12  0               81532.51600   81532.51705   -0.00105    0.00500   0.00021   81532.51384    0.00216 0.5000
  246:  22  8 15  0 21  8 14  0               81653.71900   81653.70550    0.01350    0.01500   0.00022
  247:  22  8 14  0 21  8 13  0               81653.90200   81653.91764   -0.01564    0.01500   0.00022
  248:  22  4 19  0 21  4 18  0               81790.82200   81790.82571   -0.00371    0.00500   0.00022
  249:  22  7 16  0 21  7 15  0               81832.63200   81832.63413   -0.00213    0.00500   0.00023
  250:  22  7 15  0 21  7 14  0               81837.68000   81837.68041   -0.00041    0.00500   0.00023
  251:  22  6 17  0 21  6 16  0               82089.69900   82089.70024   -0.00124    0.00500   0.00024
  252:  22  6 16  0 21  6 15  0               82170.95000   82170.94806    0.00194    0.00500   0.00024
  253:  22  5 18  0 21  5 17  0               82290.74900   82290.75043   -0.00143    0.00500   0.00024
  254:  22  5 17  0 21  5 16  0               83069.52900   83069.52830    0.00070    0.00500   0.00031
  255:  23  3 21  0 22  3 20  0               83276.68700   83276.68484    0.00216    0.00500   0.00026
  256:  24  2 23  0 23  2 22  0               83501.56400   83501.56448   -0.00048    0.00500   0.00032
  257:  24  1 23  0 23  1 22  0               83561.83400   83561.83399    0.00001    0.00500   0.00033
  258:  24  2 22  0 23  3 21  0               84643.69600   84643.69379    0.00221    0.03000   0.00038
  259:  22  3 20  0 21  2 19  0               84677.65600   84677.64766    0.00834    0.03000   0.00096
  260:  22  3 19  0 21  3 18  0               84717.77000   84717.77204   -0.00204    0.00500   0.00026
  261:  23 22  1  0 22 22  0  0               84846.61300   84846.61301   -0.00001    0.00500   0.00025
  262:  23 21  2  0 22 21  1  0               84856.26100   84856.26036    0.00064    0.00500   0.00023
  263:  23 20  3  0 22 20  2  0               84867.08500   84867.08428    0.00072    0.00500   0.00022
  264:  23 19  4  0 22 19  3  0               84879.35500   84879.35620   -0.00120    0.00500   0.00022
  265:  23 18  5  0 22 18  4  0               84893.42600   84893.42561    0.00039    0.00500   0.00021
  266:  23 17  6  0 22 17  5  0               84909.74800   84909.74885   -0.00085    0.00500   0.00020
  267:  23 16  7  0 22 16  6  0               84928.93100   84928.93092    0.00008    0.00500   0.00020
  268:  22  4 18  0 21  4 17  0               84938.79200   84938.79422   -0.00222    0.00500   0.00036
  269:  23 15  8  0 22 15  7  0               84951.78900   84951.78808    0.00092    0.00500   0.00020
  270:  23 14  9  0 22 14  8  0               84979.45000   84979.44362    0.00638    0.00500   0.00020
  271:  23 13 10  0 22 13  9  0               85013.47800   85013.47905   -0.00105    0.00500   0.00020
  272:  23 12 11  0 22 12 10  0               85056.17800   85056.18131   -0.00331    0.00500   0.00020
  273:  23 11 12  0 22 11 11  0               85110.96200   85110.96410   -0.00210    0.00500   0.00020
  274:  23 10 13  0 22 10 12  0               85183.12200   85183.12476   -0.00276    0.00500   0.00021
  275:  45  6 39  0 45  5 40  0               85198.20100   85198.20875   -0.00775    0.03000   0.00354
  276:  23  9 15  0 22  9 14  0               85281.29400   85281.28864    0.00536    0.00500   0.00021   85281.29569   -0.00169 0.5000
  277:  23  9 14  0 22  9 13  0               85281.29400   85281.30273   -0.00873    0.00500   0.00021   85281.29569   -0.00169 0.5000
  278:  33  4 30  0 33  3 31  0               85319.53400   85319.52682    0.00718    0.03000   0.00284
  279:  23  4 20  0 22  4 19  0               85385.79400   85385.79539   -0.00139    0.00500   0.00022
  280:  35  8 27  0 35  7 28  0               85406.99700   85406.99881   -0.00181    0.03000   0.00329
  281:  23  8 16  0 22  8 15  0               85420.29700   85420.28806    0.00894    0.00500   0.00022
  282:  23  8 15  0 22  8 14  0               85420.69700   85420.70827   -0.01127    0.00500   0.00022
  283:  45  9 36  0 45  8 37  0               85558.26000   85558.26149   -0.00149    0.03000   0.00429
  284:  23  7 17  0 22  7 16  0               85624.99500   85624.99540   -0.00040    0.00500   0.00023
  285:  23  7 16  0 22  7 15  0               85633.99800   85633.99898   -0.00098    0.00500   0.00023
  286:  28  1 27  0 28  0 28  0               85798.33700   85798.34526   -0.00826    0.03000   0.00344
  287:  28  2 27  0 28  1 28  0               85823.39100   85823.37353    0.01747    0.03000   0.00344
  288:  23  6 18  0 22  6 17  0               85908.20700   85908.20815   -0.00115    0.00500   0.00024
  289:  36  5 32  0 36  4 33  0               86025.85000   86025.84379    0.00621    0.03000   0.00265
  290:  23  6 17  0 22  6 16  0               86038.15900   86038.16079   -0.00179    0.00500   0.00026
  291:  23  5 19  0 22  5 18  0               86070.87500   86070.87730   -0.00230    0.00500   0.00024
  292:  62 11 51  0 62 10 52  0               86178.80100   86178.79960    0.00140    0.03000   0.00694
  293:  37  4 33  0 37  3 34  0               86496.59800   86496.60165   -0.00365    0.03000   0.00284
  294:  24  3 22  0 23  3 21  0               86632.35300   86632.35453   -0.00153    0.00500   0.00027
  295:  25  1 24  0 24  2 23  0               86694.38400   86694.38834   -0.00434    0.03000   0.00032
  296:  26  0 26  0 25  1 25  0               86766.15100   86766.14090    0.01010    0.03000   0.00042
  297:  26  1 26  0 25  1 25  0               86767.43600   86767.43632   -0.00032    0.00500   0.00042
  298:  26  0 26  0 25  0 25  0               86768.17100   86768.17100    0.00000    0.00500   0.00042
  299:  26  1 26  0 25  0 25  0               86769.48200   86769.46643    0.01557    0.03000   0.00042
  300:  25  2 24  0 24  2 23  0               86780.20900   86780.21233   -0.00333    0.00500   0.00033
  301:  69 11 58  0 69 10 59  0               86793.29800   86793.30422   -0.00622    0.03000   0.00817
  302:  25  1 24  0 24  1 23  0               86821.63300   86821.62352    0.00948    0.00500   0.00034
  303:  41  5 36  0 41  4 37  0               86912.17400   86912.19094   -0.01694    0.03000   0.00307
  304:  39  6 34  0 39  5 35  0               87004.32900   87004.35308   -0.02408    0.03000   0.00255
  305:  41  7 35  0 41  6 36  0               87020.10100   87020.11686   -0.01586    0.03000   0.00252
  306:  23  5 18  0 22  5 17  0               87158.20500   87158.20835   -0.00335    0.00500   0.00035
  307:  72 12 60  0 72 11 61  0               87198.26100   87198.27070   -0.00970    0.03000   0.00631
  308:  24  2 22  0 23  2 21  0               87349.24200   87349.24551   -0.00351    0.00500   0.00034
  309:  31  2 29  0 31  1 30  0               87407.28800   87407.28632    0.00168    0.03000   0.00317
  310:  71 12 59  0 71 11 60  0               87524.37500   87524.35861    0.01639    0.03000   0.00688
  311:  31  3 29  0 31  2 30  0               87573.22600   87573.22829   -0.00229    0.03000   0.00318
  312:  34  3 31  0 34  2 32  0               87871.49200   87871.47447    0.01753    0.03000   0.00293
  313:  44  9 35  0 44  8 36  0               88488.68900   88488.67272    0.01628    0.03000   0.00423
  314:  25  2 23  0 24  3 22  0               88525.72100   88525.75062   -0.02962    0.03000   0.00031
  315:  24 23  1  0 23 23  0  0               88533.00000   88532.99580    0.00420    0.00500   0.00026
  316:  24 22  2  0 23 22  1  0               88542.71400   88542.71217    0.00183    0.00500   0.00025
  317:  24 21  3  0 23 21  2  0               88553.52700   88553.52976   -0.00276    0.00500   0.00024
  318:  24 20  4  0 23 20  3  0               88565.69200   88565.69112    0.00088    0.00500   0.00022
  319:  24 19  5  0 23 19  4  0               88579.50500   88579.50480    0.00020    0.00500   0.00022
  320:  24 18  6  0 23 18  5  0               88595.36700   88595.36815   -0.00115    0.00500   0.00021
  321:  24 17  7  0 23 17  6  0               88613.80100   88613.80005    0.00095    0.00500   0.00020
  322:  24 16  8  0 23 16  7  0               88635.48800   88635.48866   -0.00066    0.00500   0.00020
  323:  24 15  9  0 23 15  8  0               88661.36300   88661.36270    0.00030    0.00500   0.00020
  324:  24 14 10  0 23 14  9  0               88692.70100   88692.70084    0.00016    0.00500   0.00020
  325:  24 13 11  0 23 13 10  0               88731.30300   88731.30462   -0.00162    0.00500   0.00020
  326:  24 12 12  0 23 12 11  0               88779.78100   88779.78167   -0.00067    0.00500   0.00020
  327:  70 12 58  0 70 11 59  0               88837.61100   88837.59316    0.01784    0.03000   0.00798
  328:  24 11 13  0 23 11 12  0               88842.03000   88842.03026   -0.00026    0.00500   0.00020
  329:  24 10 15  0 23 10 14  0               88924.11200   88924.11326   -0.00126    0.00500   0.00021   88924.11367   -0.00167 0.5000
  330:  24 10 14  0 23 10 13  0               88924.11200   88924.11409   -0.00209    0.00500   0.00021   88924.11367   -0.00167 0.5000
  331:  24  4 21  0 23  4 20  0               88945.59400   88945.59638   -0.00238    0.00500   0.00023
  332:  38  8 31  0 38  7 32  0               88966.26600   88966.28179   -0.01579    0.03000   0.00289
  333:  39  8 32  0 39  7 33  0               88989.76800   88989.72325    0.04475    0.03000   0.00287
  334:  23  4 19  0 22  4 18  0               89033.90200   89033.90201   -0.00001    0.00500   0.00035
  335:  24  9 16  0 23  9 15  0               89035.95100   89035.93711    0.01389    0.00500   0.00022   89035.95203   -0.00103 0.5000
  336:  24  9 15  0 23  9 14  0               89035.95100   89035.96695   -0.01595    0.00500   0.00022   89035.95203   -0.00103 0.5000
  337:  40  8 33  0 40  7 34  0               89178.05200   89178.08757   -0.03557    0.03000   0.00284
  338:  24  8 17  0 23  8 16  0               89194.53400   89194.52413    0.00987    0.01500   0.00022
  339:  24  8 16  0 23  8 15  0               89195.31700   89195.32935   -0.01235    0.01500   0.00022
  340:  37  5 33  0 37  4 34  0               89251.80400   89251.77058    0.03342    0.03000   0.00272
  341:  61 11 50  0 61 10 51  0               89321.95000   89321.95954   -0.00954    0.03000   0.00746
  342:  24  3 22  0 23  2 21  0               89337.90400   89337.90625   -0.00225    0.03000   0.00073
  343:  32  8 24  0 32  7 25  0               89372.50900   89372.50196    0.00704    0.03000   0.00311
  344:  24  7 18  0 23  7 17  0               89426.99600   89426.99728   -0.00128    0.00500   0.00024
  345:  24  7 17  0 23  7 16  0               89442.59900   89442.60051   -0.00151    0.00500   0.00024
  346:  35  8 28  0 35  7 29  0               89618.24100   89618.24778   -0.00678    0.03000   0.00296
  347:  24  6 19  0 23  6 18  0               89732.86300   89732.86249    0.00051    0.00500   0.00025
  348:  74 12 62  0 74 11 63  0               89746.53000   89746.52177    0.00823    0.03000   0.00834
  349:  65 10 55  0 65  9 56  0               89753.40300   89753.38213    0.02087    0.03000   0.00857
  350:  24  5 20  0 23  5 19  0               89835.29000   89835.29026   -0.00026    0.00500   0.00024
  351:  24  6 18  0 23  6 17  0               89935.14000   89935.14347   -0.00347    0.00500   0.00027
  352:  25  3 23  0 24  3 22  0               89968.66500   89968.66203    0.00297    0.00500   0.00028
  353:  27  1 27  0 26  1 26  0               90041.05200   90041.05650   -0.00450    0.00500   0.00043
  354:  27  0 27  0 26  0 26  0               90041.52100   90041.52728   -0.00628    0.00500   0.00043
  355:  26  2 25  0 25  2 24  0               90056.68100   90056.68758   -0.00658    0.00500   0.00034
  356:  26  1 25  0 25  1 24  0               90084.93200   90084.93146    0.00054    0.00500   0.00034
  357:  31  8 23  0 31  7 24  0               90281.38400   90281.39264   -0.00864    0.03000   0.00308
  358:  46  6 40  0 46  5 41  0               90352.21900   90352.20925    0.00975    0.03000   0.00354
  359:  33  8 26  0 33  7 27  0               90399.76000   90399.73240    0.02760    0.03000   0.00299
  360:  38  4 34  0 38  3 35  0               90486.62500   90486.60500    0.02000    0.03000   0.00288
  361:  69 12 57  0 69 11 58  0               91026.81900   91026.81967   -0.00067    0.03000   0.00915
  362:  24  5 19  0 23  5 18  0               91304.65000   91304.65206   -0.00206    0.00500   0.00038
  363:  52 10 42  0 52  9 43  0               91380.70500   91380.75014   -0.04514    0.03000   0.00567
  364:  42  5 37  0 42  4 38  0               91448.78800   91448.77094    0.01706    0.03000   0.00305
  365:  24  3 21  0 23  3 20  0               91611.78300   91611.78058    0.00242    0.00500   0.00030
  366:  25  3 23  0 24  2 22  0               91957.32400   91957.32277    0.00123    0.03000   0.00063
  367:  35  4 32  0 35  3 33  0               91986.18500   91986.18630   -0.00130    0.03000   0.00301
  368:  44  8 37  0 44  7 38  0               92035.84300   92035.85575   -0.01275    0.03000   0.00284
  369:  29  8 22  0 29  7 23  0               92093.88800   92093.88169    0.00631    0.03000   0.00301
  370:  25 24  1  0 24 24  0  0               92219.09100   92219.08880    0.00220    0.00500   0.00028
  371:  25 23  2  0 24 23  1  0               92228.88800   92228.88744    0.00056    0.00500   0.00026
  372:  25 22  3  0 24 22  2  0               92239.71900   92239.71965   -0.00065    0.00500   0.00025
  373:  25 21  4  0 24 21  3  0               92251.80800   92251.80347    0.00453    0.00500   0.00024
  374:  25 20  5  0 24 20  4  0               92265.41300   92265.41318   -0.00018    0.00500   0.00023
  375:  25 19  6  0 24 19  5  0               92280.89600   92280.89771   -0.00171    0.00500   0.00022
  376:  25 18  7  0 24 18  6  0               92298.70500   92298.70652   -0.00152    0.00500   0.00021
  377:  25 17  8  0 24 17  7  0               92319.42600   92319.42664   -0.00064    0.00500   0.00020
  378:  25 16  9  0 24 16  8  0               92343.83400   92343.83685   -0.00285    0.00500   0.00020
  379:  25 15 10  0 24 15  9  0               92372.98700   92372.98856   -0.00156    0.00500   0.00020
  380:  25 14 11  0 24 14 10  0               92408.33000   92408.33020   -0.00020    0.00500   0.00020
  381:  25 13 12  0 24 13 11  0               92451.90400   92451.90400    0.00000    0.00500   0.00020
  382:  25  4 22  0 24  4 21  0               92469.77100   92469.76065    0.01035    0.00500   0.00023
  383:  25 12 13  0 24 12 12  0               92506.67000   92506.66935    0.00065    0.00500   0.00020
  384:  25 11 14  0 24 11 13  0               92577.05600   92577.05796   -0.00196    0.00500   0.00021
  385:  27  3 24  0 26  4 23  0               92635.59300   92635.59730   -0.00430    0.03000   0.00119
  386:  25 10 16  0 24 10 15  0               92669.98000   92669.98035   -0.00035    0.00500   0.00021   92669.98128   -0.00128 0.5000
  387:  25 10 15  0 24 10 14  0               92669.98000   92669.98222   -0.00222    0.00500   0.00021   92669.98128   -0.00128 0.5000
  388:  25  9 17  0 24  9 16  0               92796.79700   92796.76737    0.02963    0.00500   0.00022   92796.79788   -0.00088 0.5000
  389:  25  9 16  0 24  9 15  0               92796.79700   92796.82839   -0.03139    0.00500   0.00022   92796.79788   -0.00088 0.5000
  390:  27  8 20  0 27  7 21  0               92830.64900   92830.67127   -0.02227    0.03000   0.00301
  391:  25  8 18  0 24  8 17  0               92976.82900   92976.82231    0.00669    0.00500   0.00023
  392:  25  8 17  0 24  8 16  0               92978.31300   92978.31906   -0.00606    0.00500   0.00023
  393:  41  6 36  0 41  5 37  0               92981.72300   92981.73073   -0.00773    0.03000   0.00269
  394:  24  4 20  0 23  4 19  0               93060.33200   93060.33200   -0.00000    0.00500   0.00033
  395:  26  8 19  0 26  7 20  0               93154.43700   93154.41902    0.01798    0.03000   0.00301
  396:  25  7 19  0 24  7 18  0               93238.76500   93238.76380    0.00120    0.00500   0.00024
  397:  25  7 18  0 24  7 17  0               93265.08100   93265.08238   -0.00138    0.00500   0.00024
  398:  26  3 24  0 25  3 23  0               93288.86900   93288.86889    0.00011    0.00500   0.00029
  399:  27  1 26  0 26  2 25  0               93293.22400   93293.22197    0.00203    0.03000   0.00034
  400:  28  1 28  0 27  1 27  0               93314.60000   93314.61090   -0.01090    0.00500   0.00044
  401:  28  0 28  0 27  0 27  0               93314.90600   93314.91174   -0.00574    0.00500   0.00044
  402:  27  2 26  0 26  2 25  0               93331.66500   93331.66486    0.00014    0.00500   0.00034
  403:  27  1 26  0 26  1 25  0               93350.80200   93350.80208   -0.00008    0.00500   0.00035
  404:  27  2 26  0 26  1 25  0               93389.24300   93389.24497   -0.00197    0.03000   0.00035
  405:  42  9 33  0 42  8 34  0               93516.17800   93516.20445   -0.02645    0.03000   0.00406
  406:  25  6 20  0 24  6 19  0               93561.35900   93561.36225   -0.00325    0.00500   0.00025
  407:  25  5 21  0 24  5 20  0               93579.15300   93579.14790    0.00510    0.00500   0.00024
  408:  26  2 24  0 25  2 23  0               93696.58700   93696.58347    0.00353    0.00500   0.00034
  409:  25  6 19  0 24  6 18  0               93868.08300   93868.08470   -0.00170    0.00500   0.00029
  410:  68 12 56  0 68 11 57  0               93944.76400   93944.74436    0.01964    0.03000   0.01015
  411:  44  7 38  0 44  6 39  0               94078.83000   94078.82837    0.00163    0.03000   0.00273
  412:  33  2 31  0 33  1 32  0               94140.41600   94140.40545    0.01055    0.03000   0.00340
  413:  56  8 48  0 56  7 49  0               94142.03400   94142.03792   -0.00392    0.03000   0.00566
  414:  33  3 31  0 33  2 32  0               94218.35200   94218.35491   -0.00291    0.03000   0.00340
  415:  26  3 24  0 25  2 23  0               94731.77600   94731.78030   -0.00430    0.03000   0.00055
  416:  51 10 41  0 51  9 42  0               94759.72700   94759.72042    0.00658    0.03000   0.00564
  417:  25  3 22  0 24  3 21  0               94908.18500   94908.18591   -0.00091    0.00500   0.00033
  418:  47  6 41  0 47  5 42  0               95344.91100   95344.89526    0.01574    0.03000   0.00353
  419:  41  9 32  0 41  8 33  0               95566.64900   95566.64735    0.00165    0.03000   0.00398
  420:  71 11 60  0 71 10 61  0               95600.76300   95600.74928    0.01372    0.03000   0.01174
  421:  43  5 38  0 43  4 39  0               95810.50100   95810.51898   -0.01798    0.03000   0.00305
  422:  27  2 25  0 26  3 24  0               95860.64300   95860.62857    0.01443    0.03000   0.00025
  423:  26 25  1  0 25 25  0  0               95904.87900   95904.87912   -0.00012    0.00500   0.00030
  424:  26 24  2  0 25 24  1  0               95914.77300   95914.77240    0.00060    0.00500   0.00028
  425:  26 23  3  0 25 23  2  0               95925.63900   95925.63812    0.00088    0.00500   0.00027
  426:  26 22  4  0 25 22  3  0               95937.67400   95937.67336    0.00064    0.00500   0.00025
  427:  26 21  5  0 25 21  4  0               95951.12500   95951.12347    0.00153    0.00500   0.00024
  428:  26  4 23  0 25  4 22  0               95958.77000   95958.76854    0.00146    0.00500   0.00024
  429:  26 20  6  0 25 20  5  0               95966.29600   95966.29715   -0.00115    0.00500   0.00023
  430:  26 19  7  0 25 19  6  0               95983.58400   95983.58715   -0.00315    0.00500   0.00022
  431:  26 18  8  0 25 18  7  0               96003.49800   96003.49947   -0.00147    0.00500   0.00021
  432:  26 17  9  0 25 17  8  0               96026.69500   96026.69518   -0.00018    0.00500   0.00020
  433:  26 16 10  0 25 16  9  0               96054.05100   96054.05153   -0.00053    0.00500   0.00020
  434:  26 15 11  0 25 15 10  0               96086.75800   96086.75343    0.00457    0.00500   0.00020
  435:  26 14 12  0 25 14 11  0               96126.43400   96126.43421   -0.00021    0.00500   0.00020
  436:  26 13 13  0 25 13 12  0               96175.39100   96175.39884   -0.00784    0.00500   0.00020
  437:  26 12 14  0 25 12 13  0               96236.99400   96236.99172    0.00228    0.00500   0.00020
  438:  26 11 15  0 25 11 14  0               96316.23300   96316.23083    0.00217    0.00500   0.00021
  439:  26 10 17  0 25 10 16  0               96420.96700   96420.96379    0.00321    0.00500   0.00021   96420.96581    0.00119 0.5000
  440:  26 10 16  0 25 10 15  0               96420.96700   96420.96783   -0.00083    0.00500   0.00021   96420.96581    0.00119 0.5000
  441:  59 11 48  0 59 10 49  0               96569.73200   96569.76554   -0.03354    0.03000   0.00798
  442:  29  1 29  0 28  1 28  0               96588.10500   96588.10961   -0.00461    0.00500   0.00045
  443:  29  0 29  0 28  0 28  0               96588.29800   96588.30138   -0.00338    0.00500   0.00045
  444:  27  3 25  0 26  3 24  0               96596.03500   96596.03381    0.00119    0.00500   0.00030
  445:  28  2 27  0 27  2 26  0               96605.63300   96605.63169    0.00131    0.00500   0.00035
  446:  28  1 27  0 27  1 26  0               96618.52200   96618.52250   -0.00050    0.00500   0.00035
  447:  26  8 19  0 25  8 18  0               96767.58900   96767.58772    0.00128    0.00500   0.00023
  448:  26  8 18  0 25  8 17  0               96770.29100   96770.29285   -0.00185    0.00500   0.00023
  449:  27  2 25  0 26  2 24  0               96895.82800   96895.82540    0.00260    0.00500   0.00034
  450:  26  7 20  0 25  7 19  0               97060.21200   97060.20813    0.00387    0.00500   0.00025
  451:  26  7 19  0 25  7 18  0               97103.49100   97103.48962    0.00138    0.00500   0.00025
  452:  26  5 22  0 25  5 21  0               97297.87600   97297.87294    0.00306    0.00500   0.00024
  453:  26  6 21  0 25  6 20  0               97390.74300   97390.74224    0.00076    0.00500   0.00026
  454:  34  2 32  0 34  1 33  0               97487.94700   97487.96127   -0.01427    0.03000   0.00352
  455:  28  3 25  0 27  4 24  0               97613.16600   97613.13615    0.02985    0.03000   0.00097
  456:  27  3 25  0 26  2 24  0               97631.22700   97631.23064   -0.00364    0.03000   0.00049
  457:  26  6 20  0 25  6 19  0               97844.03600   97844.03454    0.00146    0.00500   0.00031
  458:  26  3 23  0 25  3 22  0               98122.01000   98122.00837    0.00163    0.00500   0.00036
  459:  44  9 36  0 44  8 37  0               99313.79600   99313.80800   -0.01200    0.03000   0.00361
  460:  46  9 38  0 46  8 39  0               99326.80000   99326.80264   -0.00264    0.03000   0.00357
  461:  27  4 24  0 26  4 23  0               99413.98800   99413.98592    0.00208    0.00500   0.00025
  462:  27 26  1  0 26 26  0  0               99590.35100   99590.35391   -0.00291    0.00500   0.00032
  463:  27 25  2  0 26 25  1  0               99600.35800   99600.35343    0.00457    0.00500   0.00030
  464:  27 24  3  0 26 24  2  0               99611.26900   99611.26990   -0.00090    0.00500   0.00028
  465:  27 23  4  0 26 23  3  0               99623.28200   99623.28226   -0.00026    0.00500   0.00027
  466:  27 22  5  0 26 22  4  0               99636.61400   99636.61125    0.00275    0.00500   0.00025
  467:  27 21  6  0 26 21  5  0               99651.53300   99651.53180    0.00120    0.00500   0.00024
  468:  27 20  7  0 26 20  6  0               99668.38900   99668.38981   -0.00081    0.00500   0.00023
  469:  27 19  8  0 26 19  7  0               99687.62400   99687.62544   -0.00144    0.00500   0.00022
  470:  27 18  9  0 26 18  8  0               99709.80600   99709.80591    0.00009    0.00500   0.00021
  471:  26  5 21  0 25  5 20  0               99726.71500   99726.71485    0.00015    0.00500   0.00043
  472:  27 17 10  0 26 17  9  0               99735.67500   99735.67246    0.00254    0.00500   0.00020
  473:  27 16 11  0 26 16 10  0               99766.21000   99766.20909    0.00091    0.00500   0.00020
  474:  27 15 12  0 26 15 11  0               99802.74800   99802.74560    0.00240    0.00500   0.00020
  475:  27 14 13  0 26 14 12  0               99847.11600   99847.11626   -0.00026    0.00500   0.00020
  476:  30  1 30  0 29  1 29  0               99861.56700   99861.55790    0.00910    0.00500   0.00046
  477:  30  0 30  0 29  0 29  0               99861.68300   99861.67986    0.00314    0.00500   0.00046
  478:  29  2 28  0 28  2 27  0               99878.93300   99878.93273    0.00027    0.00500   0.00036
  479:  29  1 28  0 28  1 27  0               99887.57500   99887.57008    0.00492    0.00500   0.00036
  480:  28  3 26  0 27  3 25  0               99892.90200   99892.90133    0.00067    0.00500   0.00031
  481:  27 13 14  0 26 13 13  0               99901.91300   99901.91223    0.00077    0.00500   0.00020
  482:  27 12 15  0 26 12 14  0               99970.89900   99970.89856    0.00044    0.00500   0.00020
  483:  27 11 16  0 26 11 15  0              100059.73500  100059.73684   -0.00184    0.00500   0.00021
  484:  38  9 29  0 38  8 30  0              100069.36000  100069.36348   -0.00348    0.03000   0.00383
  485:  28  2 26  0 27  2 25  0              100110.38900  100110.38726    0.00174    0.00500   0.00034
  486:  27 10 18  0 26 10 17  0              100177.30700  100177.30969   -0.00269    0.00500   0.00022  100177.31394   -0.00694 0.5000
  487:  27 10 17  0 26 10 16  0              100177.30700  100177.31819   -0.01119    0.00500   0.00022  100177.31394   -0.00694 0.5000
  488:  58 11 47  0 58 10 48  0              100315.67900  100315.65315    0.02585    0.03000   0.00800
  489:  27  9 19  0 26  9 18  0              100338.29700  100338.27958    0.01742    0.01500   0.00023
  490:  27  9 18  0 26  9 17  0              100338.49600  100338.51220   -0.01620    0.01500   0.00023
  491:  27  8 20  0 26  8 19  0              100567.21300  100567.20895    0.00405    0.00500   0.00024
  492:  27  8 19  0 26  8 18  0              100571.97300  100571.97211    0.00089    0.00500   0.00024
  493:  28  3 26  0 27  2 25  0              100628.31500  100628.30657    0.00843    0.03000   0.00044
  494:  40  9 32  0 40  8 33  0              100737.32800  100737.35363   -0.02563    0.03000   0.00369
  495:  49 10 39  0 49  9 40  0              100811.58900  100811.59049   -0.00149    0.03000   0.00548
  496:  62  9 53  0 62  8 54  0              100828.66600  100828.67292   -0.00692    0.03000   0.00795
  497:  49  9 41  0 49  8 42  0              100832.15000  100832.17460   -0.02460    0.03000   0.00359
  498:  26  4 22  0 25  4 21  0              100846.07900  100846.07651    0.00249    0.00500   0.00029
  499:  35  3 33  0 35  2 34  0              100862.30100  100862.27205    0.02895    0.03000   0.00364
  500:  27  7 21  0 26  7 20  0              100890.95900  100890.95670    0.00230    0.00500   0.00025
  501:  27  7 20  0 26  7 19  0              100960.45000  100960.44981    0.00019    0.00500   0.00026
  502:  27  5 23  0 26  5 22  0              100987.38000  100987.37569    0.00431    0.00500   0.00024
  503:  27  3 24  0 26  3 23  0              101274.96800  101274.96438    0.00362    0.00500   0.00039
  504:  38  9 30  0 38  8 31  0              101775.99300  101776.01317   -0.02017    0.03000   0.00371
  505:  27  6 21  0 26  6 20  0              101870.33200  101870.33028    0.00172    0.00500   0.00034
  506:  36  9 27  0 36  8 28  0              102037.50500  102037.47039    0.03461    0.03000   0.00378
  507:  41  5 37  0 41  4 38  0              102623.97200  102623.97382   -0.00182    0.03000   0.00300
  508:  44  6 39  0 44  5 40  0              102709.98300  102709.97663    0.00637    0.03000   0.00289
  509:  21  4 18  0 20  3 17  0              102777.96100  102777.93295    0.02805    0.03000   0.00225
  510:  47  7 41  0 47  6 42  0              102799.65600  102799.67225   -0.01625    0.03000   0.00299
  511:  29  2 27  0 28  3 26  0              102819.90600  102819.88735    0.01865    0.03000   0.00027
  512:  28  4 25  0 27  4 24  0              102837.55500  102837.55224    0.00276    0.00500   0.00026
  513:  31  1 31  0 30  1 30  0              103134.95500  103134.95793   -0.00293    0.00500   0.00047
  514:  31  0 31  0 30  0 30  0              103135.04600  103135.03532    0.01068    0.00500   0.00047
  515:  30  1 29  0 29  2 28  0              103140.66900  103140.65135    0.01765    0.03000   0.00036
  516:  30  2 29  0 29  2 28  0              103151.81300  103151.80647    0.00653    0.00500   0.00036
  517:  30  1 29  0 29  1 28  0              103157.56700  103157.56608    0.00092    0.00500   0.00036
  518:  30  2 29  0 29  1 28  0              103168.72700  103168.72121    0.00579    0.03000   0.00037
  519:  29  3 27  0 28  3 26  0              103181.84000  103181.83942    0.00058    0.00500   0.00031
  520:  28 27  1  0 27 27  0  0              103275.50200  103275.50034    0.00166    0.00500   0.00035
  521:  28 26  2  0 27 26  1  0              103285.61800  103285.61710    0.00090    0.00500   0.00033
  522:  28 25  3  0 27 25  2  0              103296.59700  103296.60014   -0.00314    0.00500   0.00030
  523:  28 24  4  0 27 24  3  0              103308.61100  103308.61265   -0.00165    0.00500   0.00028
  524:  28 23  5  0 27 23  4  0              103321.86000  103321.85428    0.00572    0.00500   0.00027
  525:  28 22  6  0 27 22  5  0              103336.57100  103336.57132   -0.00032    0.00500   0.00025
  526:  29  2 27  0 28  2 26  0              103337.80700  103337.80666    0.00034    0.00500   0.00033
  527:  28 21  7  0 27 21  6  0              103353.07000  103353.07055   -0.00055    0.00500   0.00024
  528:  28 20  8  0 27 20  7  0              103371.74000  103371.73800    0.00200    0.00500   0.00023
  529:  28 19  9  0 27 19  8  0              103393.06200  103393.06502   -0.00302    0.00500   0.00022
  530:  28 18 10  0 27 18  9  0              103417.68500  103417.68491    0.00009    0.00500   0.00021
  531:  28 17 11  0 27 17 10  0              103446.42800  103446.42554    0.00246    0.00500   0.00020
  532:  22  4 19  0 21  3 18  0              103456.67000  103456.67112   -0.00112    0.03000   0.00222
  533:  28 16 12  0 27 16 11  0              103480.38500  103480.38635   -0.00135    0.00500   0.00020
  534:  28 15 13  0 27 15 12  0              103521.05400  103521.05400   -0.00000    0.00500   0.00020
  535:  28 14 14  0 27 14 13  0              103570.48400  103570.48075    0.00325    0.00500   0.00020
  536:  28 13 15  0 27 13 14  0              103631.56800  103631.56888   -0.00088    0.00500   0.00020
  537:  29  3 27  0 28  2 26  0              103699.77500  103699.75873    0.01627    0.03000   0.00041
  538:  28 12 16  0 27 12 15  0              103708.54200  103708.54243   -0.00043    0.00500   0.00020
  539:  28 11 17  0 27 11 16  0              103807.76800  103807.76896   -0.00096    0.00500   0.00021
  540:  28 10 19  0 27 10 18  0              103939.28500  103939.27334    0.01166    0.00500   0.00022  103939.28201    0.00299 0.5000
  541:  28 10 18  0 27 10 17  0              103939.28500  103939.29068   -0.00568    0.00500   0.00022  103939.28201    0.00299 0.5000
  542:  27  5 22  0 26  5 21  0              103960.06400  103960.06483   -0.00083    0.00500   0.00044
  543:  28  9 20  0 27  9 19  0              104119.65200  104119.64646    0.00554    0.00500   0.00023
  544:  28  9 19  0 27  9 18  0              104120.07700  104120.08203   -0.00503    0.00500   0.00023
  545:  23  4 20  0 22  3 19  0              104124.70300  104124.69447    0.00853    0.03000   0.00215
  546:  28  8 21  0 27  8 20  0              104376.03700  104376.03841   -0.00141    0.00500   0.00024
  547:  28  8 20  0 27  8 19  0              104384.22100  104384.22334   -0.00234    0.00500   0.00024
  548:  28  3 25  0 27  3 24  0              104391.52400  104391.52477   -0.00077    0.00500   0.00040
  549:  52  9 44  0 52  8 45  0              104551.46000  104551.46534   -0.00534    0.03000   0.00378
  550:  27  4 23  0 26  4 22  0              104583.93100  104583.93256   -0.00156    0.00500   0.00029
  551:  28  5 24  0 27  5 23  0              104644.24400  104644.24331    0.00069    0.00500   0.00024
  552:  28  7 22  0 27  7 21  0              104730.26500  104730.26450    0.00050    0.00500   0.00026
  553:  28  7 21  0 27  7 20  0              104839.32300  104839.32434   -0.00134    0.00500   0.00028
  554:  24  4 21  0 23  3 20  0              104852.82800  104852.81274    0.01526    0.03000   0.00206
  555:  28  6 23  0 27  6 22  0              105037.14500  105037.14579   -0.00079    0.00500   0.00026
  556:  28  6 22  0 27  6 21  0              105953.45100  105953.45334   -0.00234    0.00500   0.00038
  557:  30  2 28  0 29  3 27  0              106213.63600  106213.60690    0.02910    0.03000   0.00028
  558:  29  4 26  0 28  4 25  0              106232.22400  106232.22488   -0.00088    0.00500   0.00027
  559:  32  1 32  0 31  1 31  0              106408.33500  106408.30993    0.02507    0.00500   0.00048  106408.33444    0.00056 0.5000
  560:  32  0 32  0 31  0 31  0              106408.33500  106408.35895   -0.02395    0.00500   0.00048  106408.33444    0.00056 0.5000
  561:  31  1 30  0 30  2 29  0              106417.07100  106417.08297   -0.01197    0.03000   0.00037
  562:  31  2 30  0 30  2 29  0              106424.41500  106424.41423    0.00077    0.00500   0.00037
  563:  31  1 30  0 30  1 29  0              106428.23400  106428.23810   -0.00410    0.00500   0.00037
  564:  31  2 30  0 30  1 29  0              106435.55900  106435.56936   -0.01036    0.03000   0.00037
  565:  30  3 28  0 29  3 27  0              106464.81800  106464.82064   -0.00264    0.00500   0.00032
  566:  35  5 30  0 34  6 29  0              106489.20000  106489.23530   -0.03530    0.03000   0.00324
  567:  30  2 28  0 29  2 27  0              106575.55500  106575.55897   -0.00397    0.00500   0.00034
  568:  16  4 12  0 15  3 13  0              106648.17700  106648.15934    0.01766    0.03000   0.00187
  569:  30  3 28  0 29  2 27  0              106826.77600  106826.77271    0.00329    0.03000   0.00039
  570:  29 28  1  0 28 28  0  0              106960.30500  106960.30559   -0.00059    0.00500   0.00038
  571:  29 27  2  0 28 27  1  0              106970.55000  106970.55008   -0.00008    0.00500   0.00035
  572:  29 26  3  0 28 26  2  0              106981.62500  106981.61435    0.01065    0.00500   0.00033
  573:  29 25  4  0 28 25  3  0              106993.64700  106993.64788   -0.00088    0.00500   0.00030
  574:  29 24  5  0 28 24  4  0              107006.83100  107006.83202   -0.00102    0.00500   0.00029
  575:  29 23  6  0 28 23  5  0              107021.38600  107021.38867   -0.00267    0.00500   0.00027
  576:  29 22  7  0 28 22  6  0              107037.58900  107037.59161   -0.00261    0.00500   0.00025
  577:  29 21  8  0 28 21  7  0              107055.78000  107055.78187   -0.00187    0.00500   0.00024
  578:  29 20  9  0 28 20  8  0              107076.38800  107076.38869   -0.00069    0.00500   0.00023
  579:  29 19 10  0 28 19  9  0              107099.95300  107099.95850   -0.00550    0.00500   0.00022
  580:  29 18 11  0 28 18 10  0              107127.19200  107127.19579   -0.00379    0.00500   0.00021
  581:  29 17 12  0 28 17 11  0              107159.02100  107159.02181   -0.00081    0.00500   0.00020
  582:  29 16 13  0 28 16 12  0              107196.65900  107196.66059   -0.00159    0.00500   0.00020
  583:  29 15 14  0 28 15 13  0              107241.76800  107241.76831   -0.00031    0.00500   0.00020
  584:  29 14 15  0 28 14 14  0              107296.63200  107296.63321   -0.00121    0.00500   0.00020
  585:  29 13 16  0 28 13 15  0              107364.49400  107364.49537   -0.00137    0.00500   0.00020
  586:  29 12 17  0 28 12 16  0              107450.07900  107450.07906   -0.00006    0.00500   0.00021
  587:  29  3 26  0 28  3 25  0              107494.43900  107494.44369   -0.00469    0.00500   0.00040
  588:  29 11 19  0 28 11 18  0              107560.52500  107560.52474    0.00026    0.00500   0.00021  107560.52531   -0.00031 0.5000
  589:  29 11 18  0 28 11 17  0              107560.52500  107560.52589   -0.00089    0.00500   0.00021  107560.52531   -0.00031 0.5000
  590:  29 10 20  0 28 10 19  0              107707.13700  107707.12028    0.01672    0.00500   0.00022  107707.13746   -0.00046 0.5000
  591:  29 10 19  0 28 10 18  0              107707.13700  107707.15463   -0.01763    0.00500   0.00022  107707.13746   -0.00046 0.5000
  592:  29  9 21  0 28  9 20  0              107908.57100  107908.56374    0.00726    0.00500   0.00023
  593:  29  9 20  0 28  9 19  0              107909.35100  107909.35893   -0.00793    0.00500   0.00023
  594:  27  4 24  0 26  3 23  0              108053.36500  108053.35300    0.01200    0.03000   0.00158
  595:  28  5 23  0 27  5 22  0              108171.47100  108171.47507   -0.00407    0.00500   0.00043
  596:  29  8 22  0 28  8 21  0              108194.36600  108194.36439    0.00161    0.00500   0.00025
  597:  29  8 21  0 28  8 20  0              108208.10700  108208.11069   -0.00369    0.00500   0.00025
  598:  28  4 24  0 27  4 23  0              108208.59300  108208.59509   -0.00209    0.00500   0.00029
  599:  14  5 10  0 13  4  9  0              108226.67900  108226.64840    0.03060    0.03000   0.00231
  600:  29  5 25  0 28  5 24  0              108265.88200  108265.88551   -0.00351    0.00500   0.00024
  601:  29  7 23  0 28  7 22  0              108576.92200  108576.92788   -0.00588    0.00500   0.00027
  602:  29  7 22  0 28  7 21  0              108744.35200  108744.35861   -0.00661    0.00500   0.00029
  603:  29  6 24  0 28  6 23  0              108845.39500  108845.39878   -0.00378    0.00500   0.00026
  604:  43  5 39  0 43  4 40  0              109437.96600  109437.96568    0.00032    0.03000   0.00314
  605:  31  2 29  0 30  3 28  0              109570.17400  109570.16362    0.01038    0.03000   0.00030
  606:  30  4 27  0 29  4 26  0              109601.19000  109601.19181   -0.00181    0.00500   0.00028
  607:  33  1 33  0 32  1 32  0              109681.62200  109681.61297    0.00903    0.00500   0.00050  109681.62847   -0.00647 0.5000
  608:  33  0 33  0 32  0 32  0              109681.62200  109681.64396   -0.02196    0.00500   0.00050  109681.62847   -0.00647 0.5000
  609:  32  1 31  0 31  2 30  0              109692.05700  109692.05967   -0.00267    0.03000   0.00038
  610:  32  2 31  0 31  2 30  0              109696.85900  109696.86240   -0.00340    0.00500   0.00038
  611:  32  1 31  0 31  1 30  0              109699.39100  109699.39093    0.00007    0.00500   0.00038
  612:  32  2 31  0 31  1 30  0              109704.19900  109704.19367    0.00533    0.03000   0.00038
  613:  31  3 29  0 30  3 28  0              109743.43400  109743.43686   -0.00286    0.00500   0.00032
  614:  31  2 29  0 30  2 28  0              109821.37100  109821.37735   -0.00635    0.00500   0.00034
  615:  31  3 29  0 30  2 28  0              109994.66900  109994.65059    0.01841    0.03000   0.00037
  616:  29  6 23  0 28  6 22  0              110097.20300  110097.20617   -0.00317    0.00500   0.00041
  617:  30  3 27  0 29  3 26  0              110601.34800  110601.34699    0.00101    0.00500   0.00040
  618:  30 29  1  0 29 29  0  0              110644.75600  110644.75685   -0.00085    0.00500   0.00041
  619:  30 28  2  0 29 28  1  0              110655.13800  110655.13910   -0.00110    0.00500   0.00038
  620:  30 27  3  0 29 27  2  0              110666.29300  110666.29832   -0.00532    0.00500   0.00035
  621:  30 26  4  0 29 26  3  0              110678.36400  110678.37188   -0.00788    0.00500   0.00033
  622:  30 25  5  0 29 25  4  0              110691.52500  110691.52528   -0.00028    0.00500   0.00031
  623:  30 24  6  0 29 24  5  0              110705.95600  110705.95939   -0.00339    0.00500   0.00029
  624:  30 23  7  0 29 23  6  0              110721.91500  110721.91994   -0.00494    0.00500   0.00027
  625:  30 22  8  0 29 22  7  0              110739.71000  110739.71021   -0.00021    0.00500   0.00025
  626:  30 21  9  0 29 21  8  0              110759.70600  110759.70801   -0.00201    0.00500   0.00024
  627:  31  3 28  0 30  4 27  0              110761.39000  110761.38996    0.00004    0.03000   0.00045
  628:  30 20 10  0 29 20  9  0              110782.38400  110782.38895   -0.00495    0.00500   0.00023
  629:  30 19 11  0 29 19 10  0              110808.34500  110808.35863   -0.01363    0.01500   0.00022
  630:  30 18 12  0 29 18 11  0              110838.39800  110838.39808   -0.00008    0.00500   0.00021
  631:  30 17 13  0 29 17 12  0              110873.52100  110873.52900   -0.00800    0.00500   0.00020
  632:  30 16 14  0 29 16 13  0              110915.10900  110915.10963   -0.00063    0.00500   0.00020
  633:  30 15 15  0 29 15 14  0              110964.99300  110964.97899    0.01401    0.01500   0.00020
  634:  30 14 16  0 29 14 15  0              111025.67800  111025.68046   -0.00246    0.00500   0.00020
  635:  30 13 17  0 29 13 16  0              111100.82300  111100.82039    0.00261    0.00500   0.00020
  636:  30 12 18  0 29 12 17  0              111195.66400  111195.66779   -0.00379    0.00500   0.00021
  637:  30 11 19  0 29 11 18  0              111318.21100  111318.21294   -0.00194    0.00500   0.00022
  638:  29  4 26  0 28  3 25  0              111456.64100  111456.64097    0.00003    0.03000   0.00120
  639:  30 10 21  0 29 10 20  0              111481.15700  111481.12743    0.02957    0.00500   0.00023  111481.16059   -0.00359 0.5000
  640:  30 10 20  0 29 10 19  0              111481.15700  111481.19375   -0.03675    0.00500   0.00023  111481.16059   -0.00359 0.5000
  641:  30  9 22  0 29  9 21  0              111705.40100  111705.40022    0.00078    0.00500   0.00024
  642:  30  9 21  0 29  9 20  0              111706.81800  111706.81801   -0.00001    0.00500   0.00024
  643:  29  4 25  0 28  4 24  0              111716.46500  111716.46772   -0.00272    0.00500   0.00031
  644:  30  5 26  0 29  5 25  0              111850.62700  111850.63275   -0.00575    0.00500   0.00024
  645:  30  8 23  0 29  8 22  0              112022.37000  112022.37310   -0.00310    0.00500   0.00026
  646:  30  8 22  0 29  8 21  0              112044.96500  112044.96500   -0.00000    0.00500   0.00026
  647:  15  5 10  0 14  4 11  0              112274.90200  112274.88401    0.01799    0.03000   0.00228
  648:  29  5 24  0 28  5 23  0              112332.98400  112332.98569   -0.00169    0.00500   0.00041
  649:  30  7 24  0 29  7 23  0              112429.20300  112429.20426   -0.00126    0.00500   0.00027
  650:  30  6 25  0 29  6 24  0              112637.31300  112637.31517   -0.00217    0.00500   0.00026
  651:  30  7 23  0 29  7 22  0              112680.79500  112680.79488    0.00012    0.00500   0.00031
  652:  31  4 28  0 30  4 27  0              112947.86800  112947.87056   -0.00256    0.00500   0.00029
  653:  34  1 34  0 33  1 33  0              112954.87300  112954.86543    0.00757    0.01500   0.00052  112954.87520   -0.00220 0.5000
  654:  34  0 34  0 33  0 33  0              112954.87300  112954.88498   -0.01198    0.01500   0.00052  112954.87520   -0.00220 0.5000
  655:  33  2 32  0 32  2 31  0              112969.21600  112969.21901   -0.00301    0.00500   0.00039
  656:  33  1 32  0 32  1 31  0              112970.88100  112970.88483   -0.00383    0.00500   0.00039
  657:  33  2 32  0 32  1 31  0              112974.03500  112974.02175    0.01325    0.03000   0.00039
  658:  32  3 30  0 31  3 29  0              113018.93300  113018.93624   -0.00324    0.00500   0.00033
  659:  32  2 30  0 31  2 29  0              113073.36600  113073.36950   -0.00350    0.00500   0.00034
  660:  33  4 29  0 32  5 28  0              113422.01300  113422.04799   -0.03499    0.03000   0.00162
  661:  31  3 28  0 30  3 27  0              113723.43200  113723.43206   -0.00006    0.00500   0.00039
  662:  30  6 24  0 29  6 23  0              114300.35000  114300.35181   -0.00181    0.00500   0.00045
  663:  31 30  1  0 30 30  0  0              114328.84200  114328.84131    0.00069    0.00500   0.00045
  664:  31 29  2  0 30 29  1  0              114339.37100  114339.37098    0.00002    0.00500   0.00041
  665:  31 28  3  0 30 28  2  0              114350.63700  114350.63804   -0.00104    0.00500   0.00038
  666:  31 27  4  0 30 27  3  0              114362.76800  114362.76915   -0.00115    0.00500   0.00035
  667:  31 26  5  0 30 26  4  0              114375.91600  114375.91593    0.00007    0.00500   0.00033
  668:  31 25  6  0 30 25  5  0              114390.25900  114390.26103   -0.00203    0.00500   0.00031
  669:  31 24  7  0 30 24  6  0              114406.02000  114406.02617   -0.00617    0.00500   0.00029
  670:  31 23  8  0 30 23  7  0              114423.47700  114423.48265   -0.00565    0.00500   0.00027
  671:  31 22  9  0 30 22  8  0              114442.96200  114442.96529   -0.00329    0.00500   0.00026
  672:  31 21 10  0 30 21  9  0              114464.89100  114464.89130   -0.00030    0.00500   0.00024
  673:  31 20 11  0 30 20 10  0              114489.78500  114489.78598   -0.00098    0.00500   0.00023
  674:  31 19 12  0 30 19 11  0              114518.31700  114518.31836   -0.00136    0.00500   0.00022
  675:  31 18 13  0 30 18 12  0              114551.34900  114551.35159   -0.00259    0.00500   0.00021
  676:  31 17 14  0 30 17 13  0              114590.01300  114590.01525   -0.00225    0.00500   0.00020
  677:  31 16 15  0 30 16 14  0              114635.81000  114635.81188   -0.00188    0.00500   0.00020
  678:  31 15 16  0 30 15 15  0              114690.77300  114690.77744   -0.00444    0.00500   0.00020
  679:  31 14 17  0 30 14 16  0              114757.73100  114757.73079    0.00021    0.00500   0.00020
  680:  31 13 18  0 30 13 17  0              114840.67300  114840.67499   -0.00199    0.00500   0.00020
  681:  31 12 19  0 30 12 18  0              114945.47200  114945.47203   -0.00003    0.00500   0.00021
  682:  31 11 21  0 30 11 20  0              115081.03900  115081.03813    0.00087    0.00500   0.00022  115081.04057   -0.00157 0.5000
  683:  31 11 20  0 30 11 19  0              115081.03900  115081.04301   -0.00401    0.00500   0.00022  115081.04057   -0.00157 0.5000
  684:  30  4 26  0 29  4 25  0              115108.76000  115108.76227   -0.00227    0.00500   0.00034
  685:  31 10 22  0 30 10 21  0              115261.59000  115261.58413    0.00587    0.01500   0.00023
  686:  31 10 21  0 30 10 20  0              115261.68800  115261.70902   -0.02102    0.01500   0.00023
  687:  31  5 27  0 30  5 26  0              115397.78600  115397.78523    0.00077    0.00500   0.00025
  688:  31  9 23  0 30  9 22  0              115510.52900  115510.52769    0.00131    0.00500   0.00025
  689:  31  9 22  0 30  9 21  0              115512.99800  115512.99997   -0.00197    0.00500   0.00025
  690:  31  8 24  0 30  8 23  0              115860.09800  115860.09947   -0.00147    0.00500   0.00027
  691:  31  8 23  0 30  8 22  0              115896.47000  115896.47230   -0.00230    0.00500   0.00027
  692:  31  4 28  0 30  3 27  0              115909.93400  115909.91265    0.02135    0.03000   0.00087
  693:  16  5 11  0 15  4 12  0              115989.80300  115989.81520   -0.01220    0.03000   0.00227
  694:  45  4 41  0 45  3 42  0              116062.33400  116062.32780    0.00620    0.03000   0.00329
  695:  35  1 35  0 34  1 34  0              116228.06800  116228.06525    0.00275    0.01500   0.00053  116228.07142   -0.00342 0.5000
  696:  35  0 35  0 34  0 34  0              116228.06800  116228.07758   -0.00958    0.01500   0.00053  116228.07142   -0.00342 0.5000
  697:  34  2 33  0 33  2 32  0              116241.52400  116241.52575   -0.00175    0.00500   0.00040
  698:  34  1 33  0 33  1 32  0              116242.62100  116242.61947    0.00153    0.00500   0.00040
  699:  34  2 33  0 33  1 32  0              116244.64400  116244.66266   -0.01866    0.03000   0.00040
  700:  32  4 29  0 31  4 28  0              116275.71300  116275.71370   -0.00070    0.00500   0.00030
  701:  31  7 25  0 30  7 24  0              116284.74900  116284.75085   -0.00185    0.00500   0.00028
  702:  33  3 31  0 32  3 30  0              116292.26900  116292.27179   -0.00279    0.00500   0.00034
  703:  33  2 31  0 32  2 30  0              116330.02400  116330.02540   -0.00140    0.00500   0.00034
  704:  31  6 26  0 30  6 25  0              116408.03800  116408.03701    0.00099    0.00500   0.00026
  705:  30  5 25  0 29  5 24  0              116420.56200  116420.56490   -0.00290    0.00500   0.00039
  706:  31  7 24  0 30  7 23  0              116654.87900  116654.88183   -0.00283    0.00500   0.00033
  707:  32  3 29  0 31  3 28  0              116866.06600  116866.06449    0.00151    0.00500   0.00038
  708:  32 31  1  0 31 31  0  0              118012.54600  118012.54615   -0.00015    0.00500   0.00049
  709:  32 30  2  0 31 30  1  0              118023.23200  118023.23261   -0.00061    0.00500   0.00045
  710:  32 29  3  0 31 29  2  0              118034.61600  118034.61968   -0.00368    0.00500   0.00041
  711:  32 28  4  0 31 28  3  0              118046.82400  118046.82458   -0.00058    0.00500   0.00038
  712:  32 27  5  0 31 27  4  0              118059.98400  118059.98667   -0.00267    0.00500   0.00035
  713:  32 26  6  0 31 26  5  0              118074.27100  118074.27275   -0.00175    0.00500   0.00033
  714:  32 25  7  0 31 25  6  0              118089.88300  118089.88381   -0.00081    0.00500   0.00031
  715:  32 24  8  0 31 24  7  0              118107.06200  118107.06384   -0.00184    0.00500   0.00029
  716:  32 23  9  0 31 23  8  0              118126.11300  118126.11142    0.00158    0.00500   0.00027
  717:  32 22 10  0 31 22  9  0              118147.39800  118147.39510    0.00290    0.00500   0.00026
  718:  32 21 11  0 31 21 10  0              118171.37200  118171.37419   -0.00219    0.00500   0.00024
  719:  32 20 12  0 31 20 11  0              118198.62800  118198.62713    0.00087    0.00500   0.00023
  720:  32 19 13  0 31 19 12  0              118229.88900  118229.89087   -0.00187    0.00500   0.00022
  721:  32 18 14  0 31 18 13  0              118266.11300  118266.11645   -0.00345    0.00500   0.00021
  722:  32 17 15  0 31 17 14  0              118308.54700  118308.54917   -0.00217    0.00500   0.00021
  723:  32 16 16  0 31 16 15  0              118358.84400  118358.84644   -0.00244    0.00500   0.00020
  724:  31  4 27  0 30  4 26  0              118393.39400  118393.39659   -0.00259    0.00500   0.00038
  725:  32 15 17  0 31 15 16  0              118419.25700  118419.25612    0.00088    0.00500   0.00020
  726:  32 14 18  0 31 14 17  0              118492.89300  118492.89411   -0.00111    0.01500   0.00020
  727:  31  6 25  0 30  6 24  0              118554.30600  118554.30592    0.00008    0.00500   0.00048
  728:  32 13 19  0 31 13 18  0              118584.19500  118584.19292    0.00208    0.01500   0.00021
  729:  32 12 20  0 31 12 19  0              118699.66000  118699.65981    0.00019    0.01500   0.00021
  730:  34  4 30  0 33  5 29  0              118828.77900  118828.76561    0.01339    0.03000   0.00134
  731:  32 11 22  0 31 11 21  0              118849.23000  118849.22804    0.00196    0.01500   0.00022  118849.23287   -0.00287 0.5000
  732:  32 11 21  0 31 11 20  0              118849.23000  118849.23770   -0.00770    0.01500   0.00022  118849.23287   -0.00287 0.5000
  733:  32  5 28  0 31  5 27  0              118907.61200  118907.61184    0.00016    0.00500   0.00026
  734:  32 10 23  0 31 10 22  0              119048.80700  119048.79284    0.01416    0.01500   0.00024
  735:  32 10 22  0 31 10 21  0              119049.00700  119049.02271   -0.01571    0.01500   0.00024
  736:  32  9 24  0 31  9 23  0              119324.31000  119324.31173   -0.00173    0.00500   0.00025
  737:  32  9 23  0 31  9 22  0              119328.52800  119328.53340   -0.00540    0.00500   0.00026
  738:  36  1 36  0 35  1 35  0              119501.21100  119501.21023    0.00077    0.00500   0.00055  119501.21410   -0.00310 0.5000
  739:  36  0 36  0 35  0 35  0              119501.21100  119501.21798   -0.00698    0.00500   0.00055  119501.21410   -0.00310 0.5000
  740:  34  2 32  0 33  3 31  0              119509.08800  119509.08892   -0.00092    0.03000   0.00034
  741:  35  1 34  0 34  2 33  0              119512.48700  119512.47924    0.00776    0.03000   0.00041
  742:  35  2 34  0 34  2 33  0              119513.80200  119513.80659   -0.00459    0.00500   0.00041
  743:  35  1 34  0 34  1 33  0              119514.51900  119514.52243   -0.00343    0.00500   0.00041
  744:  34  3 32  0 33  3 31  0              119564.15000  119564.15318   -0.00318    0.00500   0.00035
  745:  33  4 30  0 32  4 29  0              119588.04000  119588.03973    0.00027    0.00500   0.00031
  746:  34  2 32  0 33  2 31  0              119590.17400  119590.17529   -0.00129    0.00500   0.00035
  747:  34  3 32  0 33  2 31  0              119645.25800  119645.23956    0.01844    0.03000   0.00036
  748:  32  8 25  0 31  8 24  0              119707.36500  119707.36629   -0.00129    0.00500   0.00028
  749:  32  8 24  0 31  8 23  0              119764.78200  119764.78335   -0.00135    0.00500   0.00028
  750:  33  3 30  0 32  3 29  0              120030.35200  120030.35483   -0.00283    0.00500   0.00038
  751:  32  7 26  0 31  7 25  0              120140.59700  120140.59529    0.00171    0.00500   0.00029
  752:  32  6 27  0 31  6 26  0              120152.92200  120152.91783    0.00417    0.00500   0.00027
  753:  31  5 26  0 30  5 25  0              120415.41700  120415.41942   -0.00242    0.00500   0.00036
  754:  32  7 25  0 31  7 24  0              120673.67600  120673.67404    0.00196    0.00500   0.00036
  755:  33  4 30  0 32  3 29  0              121184.19200  121184.16954    0.02246    0.03000   0.00064
  756:  32  4 28  0 31  4 27  0              121585.99400  121585.99591   -0.00191    0.00500   0.00042
  757:  33 32  1  0 32 32  0  0              121695.85400  121695.85855   -0.00455    0.00500   0.00053
  758:  33 31  2  0 32 31  1  0              121706.71100  121706.71087    0.00013    0.00500   0.00049
  759:  33 30  3  0 32 30  2  0              121718.23000  121718.22957    0.00043    0.00500   0.00045
  760:  33 29  4  0 32 29  3  0              121730.52200  121730.52340   -0.00140    0.00500   0.00041
  761:  33 28  5  0 32 28  4  0              121743.71900  121743.72091   -0.00191    0.00500   0.00038
  762:  33 27  6  0 32 27  5  0              121757.97500  121757.97499    0.00001    0.00500   0.00036
  763:  33 26  7  0 32 26  6  0              121773.47100  121773.46863    0.00237    0.00500   0.00033
  764:  33 25  8  0 32 25  7  0              121790.42200  121790.42235   -0.00035    0.00500   0.00031
  765:  33 24  9  0 32 24  8  0              121809.10300  121809.10390   -0.00090    0.00500   0.00029
  766:  33 23 10  0 32 23  9  0              121829.83900  121829.84092   -0.00192    0.00500   0.00028
  767:  33 22 11  0 32 22 10  0              121853.03900  121853.03795    0.00105    0.00500   0.00026
  768:  33 21 12  0 32 21 11  0              121879.19300  121879.19923   -0.00623    0.00500   0.00025
  769:  33 20 13  0 32 20 12  0              121908.95900  121908.95994   -0.00094    0.00500   0.00024
  770:  33 19 14  0 32 19 13  0              121943.13000  121943.12955    0.00045    0.00500   0.00023
  771:  33 18 15  0 32 18 14  0              121982.75200  121982.75314   -0.00114    0.00500   0.00022
  772:  33 17 16  0 32 17 15  0              122029.19700  122029.19983   -0.00283    0.00500   0.00021
  773:  33 16 17  0 32 16 16  0              122084.28900  122084.29316   -0.00416    0.00500   0.00021
  774:  33 15 18  0 32 15 17  0              122150.50400  122150.50861   -0.00461    0.00500   0.00021
  775:  33 14 19  0 32 14 18  0              122231.28100  122231.28216   -0.00116    0.00500   0.00021
  776:  33 13 20  0 32 13 19  0              122331.51200  122331.51094    0.00106    0.00500   0.00021
  777:  33  5 29  0 32  5 28  0              122381.29600  122381.29855   -0.00255    0.00500   0.00027
  778:  33 12 21  0 32 12 20  0              122458.40400  122458.40440   -0.00040    0.00500   0.00022
  779:  33 11 23  0 32 11 22  0              122623.02000  122623.01003    0.00997    0.00500   0.00023  122623.01938    0.00062 0.5000
  780:  33 11 22  0 32 11 21  0              122623.02000  122623.02873   -0.00873    0.00500   0.00023  122623.01938    0.00062 0.5000
  781:  37  1 37  0 36  1 36  0              122774.30100  122774.29802    0.00298    0.00500   0.00058  122774.30046    0.00054 0.5000
  782:  37  0 37  0 36  0 36  0              122774.30100  122774.30289   -0.00189    0.00500   0.00058  122774.30046    0.00054 0.5000
  783:  36  1 35  0 35  2 34  0              122785.24700  122785.21361    0.03339    0.03000   0.00042
  784:  36  2 35  0 35  2 34  0              122786.07400  122786.07382    0.00018    0.00500   0.00042
  785:  36  1 35  0 35  1 34  0              122786.53900  122786.54096   -0.00196    0.00500   0.00042
  786:  35  3 33  0 34  3 32  0              122835.10100  122835.09630    0.00470    0.00500   0.00035
  787:  32  6 26  0 31  6 25  0              122841.90300  122841.90584   -0.00284    0.00500   0.00051
  788:  33 10 24  0 32 10 23  0              122843.07600  122843.06943    0.00657    0.01500   0.00025
  789:  33 10 23  0 32 10 22  0              122843.47200  122843.48344   -0.01144    0.01500   0.00025
  790:  35  2 33  0 34  2 32  0              122852.94000  122852.93103    0.00897    0.00500   0.00036
  791:  34  4 31  0 33  4 30  0              122887.90200  122887.90266   -0.00066    0.00500   0.00032
  792:  33  9 25  0 32  9 24  0              123147.09900  123147.09772    0.00128    0.00500   0.00026
  793:  33  9 24  0 32  9 23  0              123154.16300  123154.16489   -0.00189    0.00500   0.00026
  794:  34  3 31  0 33  3 30  0              123214.85000  123214.85128   -0.00128    0.00500   0.00037
  795:  33  8 26  0 32  8 25  0              123563.71300  123563.71271    0.00029    0.00500   0.00029
  796:  33  8 25  0 32  8 24  0              123652.64300  123652.64345   -0.00045    0.00500   0.00030
  797:  33  4 29  0 32  4 28  0              124708.91100  124708.90939    0.00161    0.00500   0.00045
  798:  33  7 26  0 32  7 25  0              124744.47200  124744.47069    0.00131    0.00500   0.00040
  799:  34 33  1  0 33 33  0  0              125378.78300  125378.76568    0.01732    0.01500   0.00059
  800:  34 32  2  0 33 32  1  0              125389.80000  125389.79271    0.00729    0.00500   0.00053
  801:  34 31  3  0 33 31  2  0              125401.45100  125401.45413   -0.00313    0.00500   0.00048
  802:  34 30  4  0 33 30  3  0              125413.84800  125413.85111   -0.00311    0.00500   0.00044
  803:  34 29  5  0 33 29  4  0              125427.10300  125427.10259    0.00041    0.00500   0.00041
  804:  34 28  6  0 33 28  5  0              125441.34900  125441.34920   -0.00020    0.00500   0.00038
  805:  34 27  7  0 33 27  6  0              125456.75500  125456.75823   -0.00323    0.00500   0.00036
  806:  34 26  8  0 33 26  7  0              125473.52900  125473.52987   -0.00087    0.00500   0.00034
  807:  34 25  9  0 33 25  8  0              125491.90800  125491.90543    0.00257    0.00500   0.00032
  808:  34 24 10  0 33 24  9  0              125512.17400  125512.17789   -0.00389    0.00500   0.00030
  809:  34 23 11  0 33 23 10  0              125534.70200  125534.70590   -0.00390    0.00500   0.00028
  810:  34 22 12  0 33 22 11  0              125559.92900  125559.93227   -0.00327    0.00500   0.00027
  811:  34 21 13  0 33 21 12  0              125588.41000  125588.40913    0.00087    0.00500   0.00025
  812:  34 20 14  0 33 20 13  0              125620.83100  125620.83211   -0.00111    0.00500   0.00024
  813:  34 19 15  0 33 19 14  0              125658.08500  125658.08807   -0.00307    0.00500   0.00023
  814:  34 18 16  0 33 18 15  0              125701.31700  125701.32251   -0.00551    0.00500   0.00022
  815:  34 17 17  0 33 17 16  0              125752.03100  125752.03692   -0.00592    0.00500   0.00022
  816:  34 16 18  0 33 16 17  0              125812.23700  125812.23275    0.00425    0.00500   0.00021
  817:  34  5 30  0 33  5 29  0              125820.86000  125820.84803    0.01197    0.01500   0.00029
  818:  34 15 19  0 33 15 18  0              125884.63800  125884.62980    0.00820    0.01500   0.00021
  819:  34 14 20  0 33 14 19  0              125973.00400  125973.00874   -0.00474    0.01500   0.00021
  820:  38  1 38  0 37  1 37  0              126047.32800  126047.32628    0.00172    0.00500   0.00060  126047.32781    0.00019 0.5000
  821:  38  0 38  0 37  0 37  0              126047.32800  126047.32934   -0.00134    0.00500   0.00060  126047.32781    0.00019 0.5000
  822:  37  2 36  0 36  2 35  0              126058.33000  126058.33214   -0.00214    0.00500   0.00044
  823:  37  1 36  0 36  1 35  0              126058.63600  126058.63615   -0.00015    0.00500   0.00044
  824:  36  2 34  0 35  3 33  0              126080.40400  126080.39789    0.00611    0.03000   0.00036
  825:  34 13 21  0 33 13 20  0              126082.77200  126082.76917    0.00283    0.00500   0.00022
  826:  36  3 34  0 35  3 33  0              126105.46400  126105.46711   -0.00311    0.00500   0.00036
  827:  36  2 34  0 35  2 33  0              126117.63200  126117.62742    0.00458    0.00500   0.00037
  828:  36  3 34  0 35  2 33  0              126142.69400  126142.69664   -0.00264    0.03000   0.00037
  829:  35  4 32  0 34  4 31  0              126178.00600  126178.00629   -0.00029    0.00500   0.00033
  830:  34 12 23  0 33 12 22  0              126221.88300  126221.88361   -0.00061    0.00500   0.00023  126221.88429   -0.00129 0.5000
  831:  34 12 22  0 33 12 21  0              126221.88300  126221.88497   -0.00197    0.00500   0.00023  126221.88429   -0.00129 0.5000
  832:  34 11 24  0 33 11 23  0              126402.64200  126402.62415    0.01785    0.00500   0.00024  126402.64184    0.00016 0.5000
  833:  34 11 23  0 33 11 22  0              126402.64200  126402.65954   -0.01754    0.00500   0.00024  126402.64184    0.00016 0.5000
  834:  35  3 32  0 34  3 31  0              126416.88200  126416.88148    0.00052    0.00500   0.00037
  835:  34 10 25  0 33 10 24  0              126644.75400  126644.74265    0.01135    0.01500   0.00026
  836:  34 10 24  0 33 10 23  0              126645.46500  126645.47321   -0.00821    0.01500   0.00026
  837:  34  9 26  0 33  9 25  0              126979.19200  126979.19040    0.00160    0.00500   0.00028
  838:  34  9 25  0 33  9 24  0              126990.79800  126990.79955   -0.00155    0.00500   0.00028
  839:  35  4 32  0 34  3 31  0              127004.85800  127004.87238   -0.01438    0.03000   0.00050
  840:  33  6 27  0 32  6 26  0              127138.24900  127138.25132   -0.00232    0.00500   0.00051
  841:  34  8 27  0 33  8 26  0              127428.31200  127428.31523   -0.00323    0.00500   0.00030
  842:  21  5 17  0 20  4 16  0              127433.72300  127433.73170   -0.00870    0.03000   0.00261
  843:  34  6 29  0 33  6 28  0              127548.93800  127548.93912   -0.00112    0.00500   0.00027
  844:  34  8 26  0 33  8 25  0              127563.53200  127563.53548   -0.00348    0.00500   0.00032
  845:  38  5 33  0 37  6 32  0              127772.43500  127772.44240   -0.00740    0.03000   0.00238
  846:  34  4 30  0 33  4 29  0              127788.01700  127788.01616    0.00084    0.00500   0.00046
  847:  34  7 28  0 33  7 27  0              127838.28000  127838.28126   -0.00126    0.00500   0.00030
  848:  33  5 28  0 32  5 27  0              128074.99200  128074.99392   -0.00192    0.00500   0.00032
  849:   9  8  2  0  8  7  1  0              128405.77400  128405.77038    0.00362    0.03000   0.00301  128405.77038    0.00362 0.5000
  850:   9  8  1  0  8  7  2  0              128405.77400  128405.77038    0.00362    0.03000   0.00301  128405.77038    0.00362 0.5000
  851:  16  6 10  0 15  5 11  0              128588.96200  128588.98597   -0.02397    0.03000   0.00250
  852:  34  7 27  0 33  7 26  0              128873.72200  128873.72376   -0.00176    0.00500   0.00044
  853:  36  3 33  0 35  4 32  0              129045.39800  129045.44064   -0.04264    0.03000   0.00030
  854:  35 34  1  0 34 34  0  0              129061.25700  129061.25468    0.00232    0.00500   0.00065
  855:  35 33  2  0 34 33  1  0              129072.47400  129072.46507    0.00893    0.00500   0.00058
  856:  35 32  3  0 34 32  2  0              129084.27700  129084.27987   -0.00287    0.00500   0.00053
  857:  35 31  4  0 34 31  3  0              129096.79400  129096.79343    0.00057    0.00500   0.00048
  858:  35 30  5  0 34 30  4  0              129110.11800  129110.11611    0.00189    0.00500   0.00044
  859:  35 29  6  0 34 29  5  0              129124.37400  129124.37772   -0.00372    0.00500   0.00041
  860:  35 28  7  0 34 28  6  0              129139.73600  129139.73168    0.00432    0.00500   0.00038
  861:  35 27  8  0 34 27  7  0              129156.36600  129156.36055    0.00545    0.00500   0.00036
  862:  35 26  9  0 34 26  8  0              129174.47800  129174.48281   -0.00481    0.00500   0.00034
  863:  35 25 10  0 34 25  9  0              129194.36600  129194.36183    0.00417    0.00500   0.00032
  864:  35 24 11  0 34 24 10  0              129216.32200  129216.31744    0.00456    0.00500   0.00030
  865:  35  5 31  0 34  5 30  0              129228.93400  129228.93572   -0.00172    0.00500   0.00030
  866:  35 23 12  0 34 23 11  0              129240.74500  129240.74118    0.00382    0.00500   0.00029
  867:  35 22 13  0 34 22 12  0              129268.11100  129268.11660   -0.00560    0.00500   0.00027
  868:  35 21 14  0 34 21 13  0              129299.04800  129299.04672    0.00128    0.00500   0.00026
  869:  39  1 39  0 38  1 38  0              129320.29600  129320.29268    0.00332    0.00500   0.00063  129320.29363    0.00237 0.5000
  870:  39  0 39  0 38  0 38  0              129320.29600  129320.29459    0.00141    0.00500   0.00063  129320.29363    0.00237 0.5000
  871:  38  2 37  0 37  2 36  0              129330.58400  129330.58153    0.00247    0.00500   0.00045
  872:  38  1 37  0 37  1 36  0              129330.78200  129330.77887    0.00313    0.00500   0.00045
  873:  35 20 15  0 34 20 14  0              129334.29700  129334.29156    0.00544    0.00500   0.00025
  874:  35 19 16  0 34 19 15  0              129374.82300  129374.82042    0.00258    0.00500   0.00024
  875:  37  3 35  0 36  3 34  0              129375.51300  129375.51862   -0.00562    0.00500   0.00037
  876:  37  2 35  0 36  2 34  0              129383.77300  129383.77064    0.00236    0.00500   0.00038
  877:  35 18 17  0 34 18 16  0              129421.89400  129421.88583    0.00817    0.00500   0.00023
  878:  36  4 33  0 35  4 32  0              129460.66300  129460.66220    0.00080    0.00500   0.00035
  879:  35 17 18  0 34 17 17  0              129477.11600  129477.13072   -0.01472    0.01500   0.00022
  880:  35 16 19  0 34 16 18  0              129542.74400  129542.74682   -0.00282    0.00500   0.00022
  881:  35 15 20  0 34 15 19  0              129621.71700  129621.71603    0.00097    0.00500   0.00022
  882:  36  3 33  0 35  3 32  0              129633.43000  129633.43154   -0.00154    0.00500   0.00037
  883:  35 14 21  0 34 14 20  0              129718.18900  129718.18994   -0.00094    0.00500   0.00022
  884:  35 13 22  0 34 13 21  0              129838.11000  129838.11153   -0.00153    0.00500   0.00023
  885:  35 12 24  0 34 12 23  0              129990.28800  129990.28470    0.00330    0.00500   0.00024  129990.28605    0.00195 0.5000
  886:  35 12 23  0 34 12 22  0              129990.28800  129990.28739    0.00061    0.00500   0.00024  129990.28605    0.00195 0.5000
  887:  36  4 33  0 35  3 32  0              130048.67500  130048.65310    0.02190    0.03000   0.00046
  888:  35 11 25  0 34 11 24  0              130188.35400  130188.32178    0.03222    0.00500   0.00025  130188.35456   -0.00056 0.5000
  889:  35 11 24  0 34 11 23  0              130188.35400  130188.38735   -0.03335    0.00500   0.00025  130188.35456   -0.00056 0.5000
  890:  35 10 26  0 34 10 25  0              130454.15700  130454.15227    0.00473    0.00500   0.00027
  891:  35 10 25  0 34 10 24  0              130455.41200  130455.41676   -0.00476    0.00500   0.00027
  892:  35  9 27  0 34  9 26  0              130820.82800  130820.82563    0.00237    0.00500   0.00029
  893:  35  9 26  0 34  9 25  0              130839.55200  130839.55442   -0.00242    0.00500   0.00029
  894:  35  4 31  0 34  4 30  0              130848.36900  130848.36955   -0.00055    0.00500   0.00047
  895:  35  6 30  0 34  6 29  0              131193.70900  131193.70790    0.00110    0.00500   0.00028
  896:  35  8 28  0 34  8 27  0              131299.91100  131299.90662    0.00438    0.00500   0.00031
  897:  34  6 28  0 33  6 27  0              131413.78700  131413.79011   -0.00311    0.00500   0.00051
  898:  35  8 27  0 34  8 26  0              131501.81500  131501.81922   -0.00422    0.00500   0.00034
  899:  35  7 29  0 34  7 28  0              131671.42200  131671.42521   -0.00321    0.00500   0.00031
  900:  34  5 29  0 33  5 28  0              131722.67400  131722.66060    0.01340    0.01500   0.00033
  901:  10  8  3  0  9  7  2  0              132094.00200  132093.97990    0.02210    0.03000   0.00301  132093.97991    0.02209 0.5000
  902:  10  8  2  0  9  7  3  0              132094.00200  132093.97992    0.02208    0.03000   0.00301  132093.97991    0.02209 0.5000
  903:  40  1 40  0 39  1 39  0              132593.19800  132593.19491    0.00309    0.00500   0.00066  132593.19550    0.00250 0.5000
  904:  40  0 40  0 39  0 39  0              132593.19800  132593.19610    0.00190    0.00500   0.00066  132593.19550    0.00250 0.5000
  905:  39  2 38  0 38  2 37  0              132602.88700  132602.81912    0.06788    0.00500   0.00047  132602.88301    0.00399 0.5000
  906:  39  1 38  0 38  1 37  0              132602.88700  132602.94691   -0.05991    0.00500   0.00047  132602.88301    0.00399 0.5000
  907:  36  5 32  0 35  5 31  0              132608.73000  132608.73279   -0.00279    0.00500   0.00032
  908:  38  2 36  0 37  3 35  0              132634.19600  132634.17877    0.01723    0.03000   0.00039
  909:  38  3 36  0 37  3 35  0              132645.42200  132645.42059    0.00141    0.00500   0.00039
  910:  38  2 36  0 37  2 35  0              132650.99500  132650.99597   -0.00097    0.00500   0.00039
  911:  38  3 36  0 37  2 35  0              132662.22800  132662.23778   -0.00978    0.03000   0.00039
  912:  37  4 34  0 36  4 33  0              132737.78600  132737.78469    0.00131    0.00500   0.00036
  913:  36 35  1  0 35 35  0  0              132743.31300  132743.31267    0.00033    0.00500   0.00071
  914:  36 34  2  0 35 34  1  0              132754.71400  132754.71492   -0.00092    0.00500   0.00064
  915:  36 33  3  0 35 33  2  0              132766.70600  132766.69338    0.01262    0.01500   0.00058
  916:  36 32  4  0 35 32  3  0              132779.33300  132779.33626   -0.00326    0.00500   0.00052
  917:  36 31  5  0 35 31  4  0              132792.74900  132792.74627    0.00273    0.00500   0.00048
  918:  36 30  6  0 35 30  5  0              132807.04100  132807.04351   -0.00251    0.00500   0.00044
  919:  36 29  7  0 35 29  6  0              132822.37200  132822.36927    0.00273    0.00500   0.00041
  920:  36 28  8  0 35 28  7  0              132838.89000  132838.89057   -0.00057    0.00500   0.00039
  921:  36 27  9  0 35 27  8  0              132856.80100  132856.80612   -0.00512    0.00500   0.00036
  922:  37  3 34  0 36  3 33  0              132861.64200  132861.63543    0.00657    0.00500   0.00038
  923:  32  5 28  0 31  4 27  0              132872.87100  132872.85731    0.01369    0.03000   0.00230
  924:  36 26 10  0 35 26  9  0              132876.35600  132876.35382    0.00218    0.00500   0.00034
  925:  36 25 11  0 35 25 10  0              132897.81700  132897.82042   -0.00342    0.00500   0.00033
  926:  37  4 33  0 36  5 32  0              132917.15600  132917.17173   -0.01573    0.03000   0.00066
  927:  36 24 12  0 35 24 11  0              132921.55700  132921.55422    0.00278    0.00500   0.00031
  928:  36 23 13  0 35 23 12  0              132947.98200  132947.98167    0.00033    0.00500   0.00030
  929:  36 22 14  0 35 22 13  0              132977.63000  132977.62957    0.00043    0.00500   0.00028
  930:  36 21 15  0 35 21 14  0              133011.15800  133011.15502    0.00298    0.00500   0.00027
  931:  36 20 16  0 35 20 15  0              133049.39100  133049.38646    0.00454    0.00500   0.00026
  932:  35  7 28  0 34  7 27  0              133065.30900  133065.30685    0.00215    0.00500   0.00048
  933:  36 19 17  0 35 19 16  0              133093.38000  133093.38088   -0.00088    0.00500   0.00025
  934:  36 18 18  0 35 18 17  0              133144.50400  133144.50488   -0.00088    0.00500   0.00024
  935:  36 17 19  0 35 17 18  0              133204.55200  133204.55221   -0.00021    0.00500   0.00023
  936:  36 16 20  0 35 16 19  0              133275.91600  133275.91806   -0.00206    0.00500   0.00023
  937:  36 15 21  0 35 15 20  0              133361.86700  133361.86522    0.00178    0.00500   0.00023
  938:  36 14 22  0 35 14 21  0              133466.94400  133466.94436   -0.00036    0.00500   0.00023
  939:  36 13 23  0 35 13 22  0              133597.68400  133597.68617   -0.00217    0.00500   0.00024
  940:  33  5 29  0 32  4 28  0              133668.15600  133668.15995   -0.00395    0.03000   0.00207
  941:  36 12 25  0 35 12 24  0              133763.80700  133763.79989    0.00711    0.00500   0.00025  133763.80250    0.00450 0.5000
  942:  36 12 24  0 35 12 23  0              133763.80700  133763.80512    0.00188    0.00500   0.00025  133763.80250    0.00450 0.5000
  943:  36  4 32  0 35  4 31  0              133910.43100  133910.42498    0.00602    0.00500   0.00047
  944:  36 11 26  0 35 11 25  0              133980.42300  133980.36661    0.05639    0.00500   0.00026  133980.42615   -0.00315 0.5000
  945:  36 11 25  0 35 11 24  0              133980.42300  133980.48570   -0.06270    0.00500   0.00026  133980.42615   -0.00315 0.5000
  946:  36 10 27  0 35 10 26  0              134271.64900  134271.64552    0.00348    0.00500   0.00028
  947:  36 10 26  0 35 10 25  0              134273.79100  134273.79427   -0.00327    0.00500   0.00028
  948:  36  9 28  0 35  9 27  0              134672.13700  134672.13285    0.00415    0.00500   0.00030
  949:  36  9 27  0 35  9 26  0              134701.82800  134701.82776    0.00024    0.00500   0.00031
  950:  36  6 31  0 35  6 30  0              134800.16800  134800.16431    0.00369    0.00500   0.00029
  951:  36  8 29  0 35  8 28  0              135176.70400  135176.70119    0.00281    0.00500   0.00032
  952:  35  5 30  0 34  5 29  0              135243.21400  135243.21320    0.00080    0.00500   0.00035
  953:  36  8 28  0 35  8 27  0              135472.83500  135472.83194    0.00306    0.00500   0.00036
  954:  36  7 30  0 35  7 29  0              135487.75800  135487.76127   -0.00327    0.00500   0.00032
  955:  18  6 13  0 17  5 12  0              135574.80600  135574.82310   -0.01710    0.03000   0.00252
  956:  35  6 29  0 34  6 28  0              135638.58400  135638.58298    0.00102    0.00500   0.00049
  957:  11  8  4  0 10  7  3  0              135780.86000  135780.84312    0.01688    0.03000   0.00301  135780.84317    0.01683 0.5000
  958:  11  8  3  0 10  7  4  0              135780.86000  135780.84322    0.01678    0.03000   0.00301  135780.84317    0.01683 0.5000
  959:  41  1 41  0 40  1 40  0              135866.03000  135866.03071   -0.00071    0.01500   0.00069  135866.03108   -0.00108 0.5000
  960:  41  0 41  0 40  0 40  0              135866.03000  135866.03146   -0.00146    0.01500   0.00069  135866.03108   -0.00108 0.5000
  961:  40  2 39  0 39  2 38  0              135875.08700  135875.04039    0.04661    0.01500   0.00050  135875.08168    0.00532 0.5000
  962:  40  1 39  0 39  1 38  0              135875.08700  135875.12296   -0.03596    0.01500   0.00050  135875.08168    0.00532 0.5000
  963:  39  3 37  0 38  3 36  0              135915.29100  135915.28281    0.00819    0.00500   0.00040
  964:  39  2 37  0 38  2 36  0              135919.03800  135919.03451    0.00349    0.00500   0.00040
  965:  37  5 33  0 36  5 32  0              135963.70400  135963.71147   -0.00747    0.00500   0.00034
  966:  38  4 35  0 37  4 34  0              136010.91500  136010.91326    0.00174    0.00500   0.00037
  967:  38  3 35  0 37  3 34  0              136098.98800  136098.99757   -0.00957    0.00500   0.00038
  968:  37 36  1  0 36 36  0  0              136424.90100  136424.92678   -0.02578    0.01500   0.00079
  969:  37 35  2  0 36 35  1  0              136436.53600  136436.52922    0.00678    0.00500   0.00071
  970:  37 34  3  0 36 34  2  0              136448.68300  136448.68129    0.00171    0.00500   0.00063
  971:  37 33  4  0 36 33  3  0              136461.46400  136461.46567   -0.00167    0.00500   0.00057
  972:  37 32  5  0 36 32  4  0              136474.98200  136474.97812    0.00388    0.00500   0.00052
  973:  37 31  6  0 36 31  5  0              136489.33300  136489.33016    0.00284    0.00500   0.00048
  974:  37 30  7  0 36 30  6  0              136504.65000  136504.65223   -0.00223    0.00500   0.00044
  975:  37 29  8  0 36 29  7  0              136521.10200  136521.09774    0.00426    0.00500   0.00041
  976:  37 28  9  0 36 28  8  0              136538.85100  136538.84811    0.00289    0.00500   0.00039
  977:  37 27 10  0 36 27  9  0              136558.11900  136558.11916   -0.00016    0.00500   0.00037
  978:  37 26 11  0 36 26 10  0              136579.17000  136579.16930    0.00070    0.00500   0.00035
  979:  37 25 12  0 36 25 11  0              136602.30900  136602.31009   -0.00109    0.00500   0.00034
  980:  37 24 13  0 36 24 12  0              136627.92200  136627.91997    0.00203    0.00500   0.00032
  981:  37 23 14  0 36 23 13  0              136656.46000  136656.46238   -0.00238    0.00500   0.00031
  982:  37 22 15  0 36 22 14  0              136688.51100  136688.50998    0.00102    0.00500   0.00029
  983:  37 21 16  0 36 21 15  0              136724.77800  136724.77722    0.00078    0.00500   0.00028
  984:  37 20 17  0 36 20 16  0              136766.16400  136766.16522   -0.00122    0.00500   0.00027
  985:  37 19 18  0 36 19 17  0              136813.81900  136813.82413   -0.00513    0.00500   0.00026
  986:  37 18 19  0 36 18 18  0              136869.24300  136869.24194    0.00106    0.00500   0.00025
  987:  37 17 20  0 36 17 19  0              136934.37500  136934.37316    0.00184    0.00500   0.00024
  988:  37  4 33  0 36  4 32  0              136988.13000  136988.12813    0.00187    0.00500   0.00046
  989:  37 14 23  0 36 14 22  0              137219.39400  137219.39346    0.00054    0.00500   0.00024
  990:  36  7 29  0 35  7 28  0              137318.25100  137318.25065    0.00035    0.00500   0.00052
  991:  37 13 24  0 36 13 23  0              137361.64600  137361.64597    0.00003    0.00500   0.00025
  992:  37 12 26  0 36 12 25  0              137542.63600  137542.63026    0.00574    0.00500   0.00026  137542.63522    0.00078 0.5000
  993:  37 12 25  0 36 12 24  0              137542.63600  137542.64019   -0.00419    0.00500   0.00026  137542.63522    0.00078 0.5000
  994:  37 11 27  0 36 11 26  0              137779.04800  137779.03547    0.01253    0.01500   0.00028
  995:  37 11 26  0 36 11 25  0              137779.23400  137779.24769   -0.01369    0.01500   0.00028
  996:  37 10 28  0 36 10 27  0              138097.57300  138097.57072    0.00228    0.00500   0.00029
  997:  37 10 27  0 36 10 26  0              138101.15800  138101.15871   -0.00071    0.00500   0.00029
  998:  37  6 32  0 36  6 31  0              138367.38800  138367.38794    0.00006    0.00500   0.00031
  999:  37  9 29  0 36  9 28  0              138533.08800  138533.08723    0.00077    0.00500   0.00032
 1000:  37  9 28  0 36  9 27  0              138579.38600  138579.38662   -0.00062    0.00500   0.00032
 1001:  36  5 31  0 35  5 30  0              138638.12300  138638.12139    0.00161    0.00500   0.00039
 1002:  37  8 30  0 36  8 29  0              139056.33700  139056.33671    0.00029    0.00500   0.00034
 1003:  42  1 42  0 41  1 41  0              139138.80000  139138.79787    0.00213    0.00500   0.00073  139138.79811    0.00189 0.5000
 1004:  42  0 42  0 41  0 41  0              139138.80000  139138.79834    0.00166    0.00500   0.00073  139138.79811    0.00189 0.5000
 1005:  41  2 40  0 40  2 39  0              139147.26800  139147.24003    0.02797    0.00500   0.00052  139147.26665    0.00135 0.5000
 1006:  41  1 40  0 40  1 39  0              139147.26800  139147.29327   -0.02527    0.00500   0.00052  139147.26665    0.00135 0.5000
 1007:  40  2 38  0 39  3 37  0              139180.20300  139180.19768    0.00532    0.03000   0.00042
 1008:  40  3 38  0 39  3 37  0              139185.17500  139185.17275    0.00225    0.00500   0.00042
 1009:  40  2 38  0 39  2 37  0              139187.68600  139187.68780   -0.00180    0.00500   0.00042
 1010:  39  4 36  0 38  4 35  0              139281.25800  139281.25270    0.00530    0.00500   0.00038
 1011:  37  7 31  0 36  7 30  0              139282.41400  139282.41372    0.00028    0.00500   0.00032
 1012:  38  5 34  0 37  5 33  0              139297.45300  139297.45062    0.00238    0.00500   0.00036
 1013:  39  3 36  0 38  3 35  0              139343.45800  139343.45700    0.00100    0.00500   0.00039
 1014:  12  8  5  0 11  7  4  0              139465.68600  139465.68608   -0.00008    0.03000   0.00301  139465.68631   -0.00031 0.5000
 1015:  12  8  4  0 11  7  5  0              139465.68600  139465.68654   -0.00054    0.03000   0.00301  139465.68631   -0.00031 0.5000
 1016:  37  8 29  0 36  8 28  0              139482.88800  139482.88824   -0.00024    0.00500   0.00040
 1017:  39  4 36  0 38  3 35  0              139484.50000  139484.53920   -0.03920    0.03000   0.00042
 1018:  36  6 30  0 35  6 29  0              139786.02100  139786.01995    0.00105    0.00500   0.00046
 1019:  38  4 34  0 37  4 33  0              140089.00500  140089.00092    0.00408    0.00500   0.00046
 1020:  38 36  2  0 37 36  1  0              140117.89400  140117.89492   -0.00092    0.00500   0.00078
 1021:  38 35  3  0 37 35  2  0              140130.22900  140130.23029   -0.00129    0.00500   0.00070
 1022:  38 34  4  0 37 34  3  0              140143.16400  140143.16780   -0.00380    0.00500   0.00062
 1023:  38 33  5  0 37 33  4  0              140156.79600  140156.79701   -0.00101    0.00500   0.00056
 1024:  38 32  6  0 37 32  5  0              140171.22200  140171.22167    0.00033    0.00500   0.00052
 1025:  38 31  7  0 37 31  6  0              140186.56300  140186.56262    0.00038    0.00500   0.00048
 1026:  38 30  8  0 37 30  7  0              140202.95900  140202.96119   -0.00219    0.00500   0.00044
 1027:  38 29  9  0 37 29  8  0              140220.58700  140220.58364    0.00336    0.00500   0.00042
 1028:  38 28 10  0 37 28  9  0              140239.62700  140239.62657    0.00043    0.00500   0.00040
 1029:  38 27 11  0 37 27 10  0              140260.32600  140260.32389    0.00211    0.00500   0.00038
 1030:  38 26 12  0 37 26 11  0              140282.95700  140282.95572    0.00128    0.00500   0.00036
 1031:  38 25 13  0 37 25 12  0              140307.86100  140307.85981    0.00119    0.00500   0.00034
 1032:  38 24 14  0 37 24 13  0              140335.44600  140335.44652   -0.00052    0.00500   0.00033
 1033:  38 23 15  0 37 23 14  0              140366.22000  140366.21844    0.00156    0.00500   0.00032
 1034:  38 22 16  0 37 22 15  0              140400.79700  140400.79676    0.00024    0.00500   0.00030
 1035:  38 21 17  0 37 21 16  0              140439.96100  140439.95675    0.00425    0.00500   0.00029
 1036:  38 20 18  0 37 20 17  0              140484.68100  140484.67653    0.00447    0.00500   0.00028
 1037:  38 19 19  0 37 19 18  0              140536.20600  140536.20524    0.00076    0.00500   0.00027
 1038:  38 18 20  0 37 18 19  0              140596.16200  140596.15988    0.00212    0.00500   0.00026
 1039:  38 17 21  0 37 17 20  0              140666.66600  140666.66615   -0.00015    0.00500   0.00026
 1040:  38 16 22  0 37 16 21  0              140750.57200  140750.56859    0.00341    0.00500   0.00025
 1041:  38 15 23  0 37 15 22  0              140851.75700  140851.75323    0.00377    0.00500   0.00025
 1042:  38 14 24  0 37 14 23  0              140975.66500  140975.66180    0.00320    0.00500   0.00026
 1043:  38 13 25  0 37 13 24  0              141130.14900  141130.14907   -0.00007    0.00500   0.00026
 1044:  38 12 27  0 37 12 26  0              141327.00100  141326.98597    0.01503    0.00500   0.00028  141326.99523    0.00577 0.5000
 1045:  38 12 26  0 37 12 25  0              141327.00100  141327.00448   -0.00348    0.00500   0.00028  141326.99523    0.00577 0.5000
 1046:  38 11 28  0 37 11 27  0              141584.62900  141584.61880    0.01020    0.01500   0.00029
 1047:  38 11 27  0 37 11 26  0              141584.99000  141584.99028   -0.00028    0.01500   0.00029
 1048:  37  7 30  0 36  7 29  0              141624.45100  141624.44199    0.00901    0.00500   0.00056
 1049:  38  6 33  0 37  6 32  0              141895.44300  141895.43819    0.00481    0.00500   0.00032
 1050:  37  5 32  0 36  5 31  0              141915.44200  141915.44068    0.00132    0.00500   0.00044
 1051:  38 10 29  0 37 10 28  0              141932.26500  141932.26741   -0.00241    0.00500   0.00031
 1052:  38 10 28  0 37 10 27  0              141938.16300  141938.15904    0.00396    0.00500   0.00031
 1053:  38  9 30  0 37  9 29  0              142403.45800  142403.45114    0.00686    0.00500   0.00034
 1054:  43  1 43  0 42  1 42  0              142411.49900  142411.49423    0.00477    0.01500   0.00076  142411.49438    0.00462 0.5000
 1055:  43  0 43  0 42  0 42  0              142411.49900  142411.49453    0.00447    0.01500   0.00076  142411.49438    0.00462 0.5000
 1056:  42  2 41  0 41  2 40  0              142419.42900  142419.41237    0.01663    0.00500   0.00055  142419.42949   -0.00049 0.5000
 1057:  42  1 41  0 41  1 40  0              142419.42900  142419.44662   -0.01762    0.00500   0.00055  142419.42949   -0.00049 0.5000
 1058:  41  3 39  0 40  3 38  0              142455.13300  142455.12861    0.00439    0.01500   0.00044
 1059:  41  2 39  0 40  2 38  0              142456.82100  142456.80873    0.01227    0.01500   0.00044
 1060:  38  9 29  0 37  9 28  0              142474.47900  142474.47415    0.00485    0.00500   0.00034
 1061:  40  4 37  0 39  4 36  0              142549.72300  142549.72166    0.00134    0.01500   0.00040
 1062:  40  3 37  0 39  3 36  0              142593.37400  142593.36903    0.00497    0.01500   0.00041
 1063:  38  8 31  0 37  8 30  0              142935.84600  142935.84492    0.00108    0.00500   0.00035
 1064:  38  7 32  0 37  7 31  0              143050.67600  143050.67382    0.00218    0.00500   0.00033
 1065:  13  8  6  0 12  7  5  0              143147.73000  143147.73226   -0.00226    0.03000   0.00301  143147.73313   -0.00313 0.5000
 1066:  13  8  5  0 12  7  6  0              143147.73000  143147.73400   -0.00400    0.03000   0.00301  143147.73313   -0.00313 0.5000
 1067:  39  4 35  0 38  4 34  0              143215.50300  143215.50180    0.00120    0.00500   0.00045
 1068:  38  8 30  0 37  8 29  0              143539.08400  143539.07945    0.00455    0.00500   0.00043
 1069:  39 38  1  0 38 38  0  0              143786.77400  143786.77165    0.00235    0.00500   0.00099
 1070:  39 37  2  0 38 37  1  0              143798.79800  143798.79899   -0.00099    0.00500   0.00087
 1071:  39 36  3  0 38 36  2  0              143811.32700  143811.32708   -0.00008    0.00500   0.00077
 1072:  39 35  4  0 38 35  3  0              143824.42900  143824.42894    0.00006    0.00500   0.00069
 1073:  37  6 31  0 36  6 30  0              143834.77000  143834.76542    0.00458    0.00500   0.00043
 1074:  39 34  5  0 38 34  4  0              143838.18500  143838.18847   -0.00347    0.00500   0.00062
 1075:  39 33  6  0 38 33  5  0              143852.70800  143852.70247    0.00553    0.00500   0.00056
 1076:  39 32  7  0 38 32  6  0              143868.08800  143868.08317    0.00483    0.00500   0.00051
 1077:  39 31  8  0 38 31  7  0              143884.46100  143884.46118   -0.00018    0.00500   0.00048
 1078:  39 30  9  0 38 30  8  0              143901.98800  143901.98937   -0.00137    0.00500   0.00045
 1079:  39 29 10  0 38 29  9  0              143920.84700  143920.84751   -0.00051    0.00500   0.00042
 1080:  39 28 11  0 38 28 10  0              143941.25100  143941.24824    0.00276    0.00500   0.00040
 1081:  39 27 12  0 38 27 11  0              143963.44900  143963.44459    0.00441    0.00500   0.00039
 1082:  39 26 13  0 38 26 12  0              143987.74100  143987.73957    0.00143    0.00500   0.00037
 1083:  39 25 14  0 38 25 13  0              144014.50100  144014.49862    0.00238    0.00500   0.00036
 1084:  39 24 15  0 38 24 14  0              144044.16800  144044.16578    0.00222    0.00500   0.00034
 1085:  39 23 16  0 38 23 15  0              144077.28600  144077.28508    0.00092    0.00500   0.00033
 1086:  39 22 17  0 38 22 16  0              144114.53100  144114.52902    0.00198    0.00500   0.00032
 1087:  39 21 18  0 38 21 17  0              144156.73900  144156.73721    0.00179    0.00500   0.00030
 1088:  39 20 19  0 38 20 18  0              144204.96300  144204.96942   -0.00642    0.00500   0.00029
 1089:  39 19 20  0 38 19 19  0              144260.58100  144260.57974    0.00126    0.00500   0.00028
 1090:  39 18 21  0 38 18 20  0              144325.31900  144325.32219   -0.00319    0.00500   0.00028
 1091:  39 17 22  0 38 17 21  0              144401.50800  144401.50474    0.00326    0.00500   0.00027
 1092:  39 16 23  0 38 16 22  0              144492.22100  144492.21947    0.00153    0.00500   0.00027
 1093:  39 15 24  0 38 15 23  0              144601.69700  144601.69753   -0.00053    0.00500   0.00027
 1094:  40  4 36  0 39  5 35  0              144713.82100  144713.82314   -0.00214    0.03000   0.00039
 1095:  39 14 25  0 38 14 24  0              144735.88000  144735.87745    0.00255    0.00500   0.00027
 1096:  10  9  2  0  9  8  1  0              144787.21400  144787.22897   -0.01497    0.03000   0.00377  144787.22897   -0.01497 0.5000
 1097:  10  9  1  0  9  8  2  0              144787.21400  144787.22897   -0.01497    0.03000   0.00377  144787.22897   -0.01497 0.5000
 1098:  39 13 27  0 38 13 26  0              144903.36000  144903.35811    0.00189    0.00500   0.00028  144903.35884    0.00116 0.5000
 1099:  39 13 26  0 38 13 25  0              144903.36000  144903.35956    0.00044    0.00500   0.00028  144903.35884    0.00116 0.5000
 1100:  38  5 33  0 37  5 32  0              145090.90800  145090.90519    0.00281    0.00500   0.00049
 1101:  39 12 28  0 38 12 27  0              145117.10600  145117.08726    0.01874    0.00500   0.00029  145117.10418    0.00182 0.5000
 1102:  39 12 27  0 38 12 26  0              145117.10600  145117.12110   -0.01510    0.00500   0.00029  145117.10418    0.00182 0.5000
 1103:  39  6 34  0 38  6 33  0              145385.31700  145385.31562    0.00138    0.00500   0.00034
 1104:  39 11 29  0 38 11 28  0              145397.42500  145397.42063    0.00437    0.00500   0.00031
 1105:  39 11 28  0 38 11 27  0              145398.05800  145398.05981   -0.00181    0.00500   0.00031
 1106:  44  1 44  0 43  1 43  0              145684.11800  145684.11767    0.00033    0.00500   0.00080  145684.11776    0.00024 0.5000
 1107:  44  0 44  0 43  0 43  0              145684.11800  145684.11785    0.00015    0.00500   0.00080  145684.11776    0.00024 0.5000
 1108:  43  2 42  0 42  2 41  0              145691.56400  145691.55170    0.01230    0.00500   0.00057  145691.56270    0.00130 0.5000
 1109:  43  1 42  0 42  1 41  0              145691.56400  145691.57370   -0.00970    0.00500   0.00057  145691.56270    0.00130 0.5000
 1110:  42  3 40  0 41  3 39  0              145725.17000  145725.16884    0.00116    0.00500   0.00046
 1111:  42  2 40  0 41  2 39  0              145726.28600  145726.28753   -0.00153    0.00500   0.00046
 1112:  39 10 30  0 38 10 29  0              145776.05900  145776.05163    0.00737    0.00500   0.00033
 1113:  39 10 29  0 38 10 28  0              145785.57400  145785.57150    0.00250    0.00500   0.00033
 1114:  41  4 38  0 40  4 37  0              145817.00600  145817.00312    0.00288    0.00500   0.00042
 1115:  41  3 38  0 40  3 37  0              145847.45300  145847.45116    0.00184    0.00500   0.00042
 1116:  40  5 36  0 39  5 35  0              145915.03200  145915.03339   -0.00139    0.00500   0.00039
 1117:  38  7 31  0 37  7 30  0              145967.20000  145967.20018   -0.00018    0.00500   0.00059
 1118:  39  9 31  0 38  9 30  0              146282.70700  146282.70622    0.00078    0.00500   0.00035
 1119:  40  4 36  0 39  4 35  0              146366.77400  146366.77023    0.00377    0.01500   0.00045
 1120:  39  9 30  0 38  9 29  0              146389.93900  146389.93512    0.00388    0.00500   0.00037
 1121:  39  7 33  0 38  7 32  0              146788.22100  146788.21994    0.00106    0.00500   0.00035
 1122:  39  8 32  0 38  8 31  0              146811.66400  146811.66141    0.00259    0.00500   0.00037
 1123:  40 37  3  0 39 37  2  0              147491.96200  147491.95839    0.00361    0.01500   0.00086
 1124:  40 36  4  0 39 36  3  0              147505.23500  147505.23542   -0.00042    0.01500   0.00076
 1125:  40 35  5  0 39 35  4  0              147519.14200  147519.13821    0.00379    0.01500   0.00068
 1126:  40 34  6  0 39 34  5  0              147533.76300  147533.75730    0.00570    0.01500   0.00061
 1127:  40 33  7  0 39 33  6  0              147549.18600  147549.19715   -0.01115    0.01500   0.00055
 1128:  40 32  8  0 39 32  7  0              147565.58400  147565.57885    0.00515    0.01500   0.00051
 1129:  40 31  9  0 39 31  8  0              147583.04000  147583.04338   -0.00338    0.01500   0.00048
 1130:  40 30 10  0 39 30  9  0              147601.75100  147601.75571   -0.00471    0.01500   0.00045
 1131:  40 29 11  0 39 29 10  0              147621.90800  147621.90989   -0.00189    0.01500   0.00043
 1132:  40 28 12  0 39 28 11  0              147643.73600  147643.73545    0.00055    0.01500   0.00041
 1133:  39  8 31  0 38  8 30  0              147648.73600  147648.73331    0.00269    0.00500   0.00047
 1134:  40 27 13  0 39 27 12  0              147667.49500  147667.50556   -0.01056    0.01500   0.00040
 1135:  40 26 14  0 39 26 13  0              147693.54600  147693.54740   -0.00140    0.01500   0.00038
 1136:  40 25 15  0 39 25 14  0              147722.25200  147722.25560   -0.00360    0.01500   0.00037
 1137:  40 24 16  0 39 24 15  0              147754.10800  147754.10978   -0.00178    0.01500   0.00036
 1138:  38  6 32  0 37  6 31  0              147768.88800  147768.89007   -0.00207    0.00500   0.00041
 1139:  40 23 17  0 39 23 16  0              147789.70600  147789.69767    0.00833    0.01500   0.00034
 1140:  40 22 18  0 39 22 17  0              147829.74400  147829.74602   -0.00202    0.01500   0.00033
 1141:  40 21 19  0 39 21 18  0              147875.16000  147875.16250   -0.00250    0.01500   0.00032
 1142:  40 20 20  0 39 20 19  0              147927.09000  147927.09326   -0.00326    0.01500   0.00031
 1143:  40 19 21  0 39 19 20  0              147986.99900  147987.00361   -0.00461    0.01500   0.00030
 1144:  40 18 22  0 39 18 21  0              148056.79000  148056.79308   -0.00308    0.01500   0.00029
 1145:  40 17 23  0 39 17 22  0              148138.96300  148138.96348   -0.00048    0.01500   0.00029
 1146:  39  5 34  0 38  5 33  0              148187.29400  148187.29868   -0.00468    0.00500   0.00053
 1147:  40 16 24  0 39 16 23  0              148236.86700  148236.87095   -0.00395    0.01500   0.00028
 1148:  40 15 25  0 39 15 24  0              148355.11300  148355.11616   -0.00316    0.01500   0.00028
 1149:  40 14 26  0 39 14 25  0              148500.17000  148500.17231   -0.00231    0.01500   0.00029
 1150:  40 13 28  0 39 13 27  0              148681.44900  148681.44534    0.00366    0.01500   0.00030  148681.44673    0.00227 0.5000
 1151:  40 13 27  0 39 13 26  0              148681.44900  148681.44811    0.00089    0.01500   0.00030  148681.44673    0.00227 0.5000
 1152:  40  6 35  0 39  6 34  0              148838.87500  148838.87393    0.00107    0.01500   0.00037
 1153:  40 12 29  0 39 12 28  0              148913.18900  148913.16539    0.02361    0.01500   0.00031  148913.19580   -0.00680 0.5000
 1154:  40 12 28  0 39 12 27  0              148913.18900  148913.22620   -0.03720    0.01500   0.00031  148913.19580   -0.00680 0.5000
 1155:  45  1 45  0 44  1 44  0              148956.66100  148956.66609   -0.00509    0.00500   0.00085  148956.66615   -0.00515 0.5000
 1156:  45  0 45  0 44  0 44  0              148956.66100  148956.66621   -0.00521    0.00500   0.00085  148956.66615   -0.00515 0.5000
 1157:  44  2 43  0 43  2 42  0              148963.65700  148963.65249    0.00451    0.00500   0.00061  148963.65954   -0.00254 0.5000
 1158:  44  1 43  0 43  1 42  0              148963.65700  148963.66659   -0.00959    0.00500   0.00061  148963.65954   -0.00254 0.5000
 1159:  43  3 41  0 42  3 40  0              148995.33400  148995.29891    0.03509    0.01500   0.00048
 1160:  43  2 41  0 42  2 40  0              148996.03500  148996.04149   -0.00649    0.00500   0.00048
 1161:  42  4 39  0 41  4 38  0              149083.58800  149083.59192   -0.00392    0.01500   0.00043
 1162:  42  3 39  0 41  3 38  0              149104.71300  149104.71878   -0.00578    0.01500   0.00044
 1163:  54 22 32  0 53 22 31  0              200021.28000  200021.28267   -0.00267    0.01500   0.00062
 1164:  54 21 33  0 53 21 32  0              200131.20600  200131.22172   -0.01572    0.01500   0.00060
 1165:  54 20 34  0 53 20 33  0              200257.87400  200257.86697    0.00703    0.01500   0.00059
 1166:  54 18 36  0 53 18 35  0              200578.06500  200578.07149   -0.00649    0.01500   0.00057
 1167:  54 17 37  0 53 17 36  0              200783.69500  200783.69187    0.00313    0.01500   0.00057
 1168:  54 16 39  0 53 16 38  0              201031.57500  201031.57125    0.00375    0.01500   0.00057  201031.57185    0.00315 0.5000
 1169:  54 16 38  0 53 16 37  0              201031.57500  201031.57246    0.00254    0.01500   0.00057  201031.57185    0.00315 0.5000
 1170:  52  9 43  0 51  9 42  0              201129.20200  201129.18715    0.01485    0.01500   0.00103
 1171:  53  7 46  0 52  7 45  0              201177.92100  201177.93822   -0.01722    0.01500   0.00092
 1172:  56  6 51  0 55  6 50  0              201620.79700  201620.80011   -0.00311    0.01500   0.00082
 1173:  56  5 51  0 55  5 50  0              201644.49500  201644.49226    0.00274    0.01500   0.00082
 1174:  56 15 42  0 55 15 41  0              208983.05000  208983.01457    0.03543    0.01500   0.00065  208983.04678    0.00322 0.5000
 1175:  56 15 41  0 55 15 40  0              208983.05000  208983.07898   -0.02898    0.01500   0.00065  208983.04678    0.00322 0.5000
 1176:  54  8 46  0 53  8 45  0              209346.68300  209346.68541   -0.00241    0.01500   0.00089
 1177:  56 14 43  0 55 14 42  0              209414.31700  209414.29826    0.01874    0.01500   0.00068
 1178:  56 14 42  0 55 14 41  0              209415.22100  209415.23063   -0.00963    0.01500   0.00068
 1179:  54  9 45  0 53  9 44  0              209854.65500  209854.66267   -0.00767    0.01500   0.00109
 1180:  56 13 44  0 55 13 43  0              209970.07700  209970.07732   -0.00032    0.01500   0.00072
 1181:  56 13 43  0 55 13 42  0              209981.21400  209981.22330   -0.00930    0.01500   0.00072
 1182:  56  7 49  0 55  7 48  0              210022.45800  210022.46652   -0.00852    0.01500   0.00099
 1183:  57 41 16  0 56 41 15  0              210243.95400  210243.95164    0.00236    0.01500   0.00119
 1184:  57 40 17  0 56 40 16  0              210269.60600  210269.60148    0.00452    0.01500   0.00108
 1185:  57 39 18  0 56 39 17  0              210296.47000  210296.49918   -0.02918    0.03000   0.00099
 1186:  57 38 19  0 56 38 18  0              210324.81400  210324.79873    0.01527    0.01500   0.00094
 1187:  57 37 20  0 56 37 19  0              210354.68500  210354.67529    0.00971    0.01500   0.00091
 1188:  57 36 21  0 56 36 20  0              210386.33000  210386.32889    0.00111    0.01500   0.00089
 1189:  57 35 22  0 56 35 21  0              210419.99200  210419.98877    0.00323    0.01500   0.00089
 1190:  57 34 23  0 56 34 22  0              210455.91800  210455.91878   -0.00078    0.01500   0.00089
 1191:  57 33 24  0 56 33 23  0              210494.41800  210494.42381   -0.00581    0.01500   0.00088
 1192:  57 32 25  0 56 32 24  0              210535.84300  210535.85785   -0.01485    0.01500   0.00088
 1193:  57 31 26  0 56 31 25  0              210580.63500  210580.63388    0.00112    0.01500   0.00088
 1194:  57 30 27  0 56 30 26  0              210629.24200  210629.23620    0.00580    0.01500   0.00087
 1195:  57 29 28  0 56 29 27  0              210682.23400  210682.23594   -0.00194    0.01500   0.00085
 1196:  56 12 45  0 55 12 44  0              210687.47100  210687.46732    0.00368    0.01500   0.00077
 1197:  57 28 29  0 56 28 28  0              210740.30300  210740.31072   -0.00772    0.01500   0.00084
 1198:  56 12 44  0 55 12 43  0              210794.00400  210794.00797   -0.00397    0.01500   0.00078
 1199:  57 27 30  0 56 27 29  0              210804.26200  210804.26984   -0.00784    0.01500   0.00082
 1200:  55 10 45  0 54 10 44  0              210861.40900  210861.41090   -0.00190    0.01500   0.00116
 1201:  57 26 31  0 56 26 30  0              210875.07900  210875.08672   -0.00772    0.01500   0.00079
 1202:  57 25 32  0 56 25 31  0              210953.94500  210953.94154    0.00346    0.01500   0.00077
 1203:  56  9 48  0 55  9 47  0              211013.91000  211013.90628    0.00372    0.01500   0.00085
 1204:  57 24 33  0 56 24 32  0              211042.28000  211042.27755    0.00245    0.01500   0.00074
 1205:  64  0 64  0 63  0 63  0              211118.23100  211118.24268   -0.01168    0.01500   0.00214
 1206:  63  1 62  0 62  1 61  0              211120.64800  211120.65486   -0.00686    0.01500   0.00161
 1207:  62  2 60  0 61  2 59  0              211132.52200  211132.51716    0.00484    0.01500   0.00125
 1208:  57 23 34  0 56 23 33  0              211141.88600  211141.87687    0.00913    0.01500   0.00072
 1209:  61  4 58  0 60  4 57  0              211165.49900  211165.49964   -0.00064    0.01500   0.00104  211165.50491   -0.00591 0.5000
 1210:  61  3 58  0 60  3 57  0              211165.49900  211165.51018   -0.01118    0.01500   0.00104  211165.50491   -0.00591 0.5000
 1211:  60  5 56  0 59  5 55  0              211239.74000  211239.73912    0.00088    0.01500   0.00095
 1212:  60  4 56  0 59  4 55  0              211240.09600  211240.09391    0.00209    0.01500   0.00095
 1213:  57 22 35  0 56 22 34  0              211254.97400  211254.96414    0.00986    0.01500   0.00069
 1214:  57 21 36  0 56 21 35  0              211384.34500  211384.35075   -0.00575    0.01500   0.00067
 1215:  59  6 54  0 58  6 53  0              211390.19900  211390.21482   -0.01582    0.01500   0.00092
 1216:  59  5 54  0 58  5 53  0              211398.30600  211398.32327   -0.01727    0.01500   0.00092
 1217:  56 11 46  0 55 11 45  0              211495.75800  211495.75093    0.00707    0.01500   0.00082
 1218:  57 20 37  0 56 20 36  0              211533.63500  211533.64051   -0.00551    0.01500   0.00065
 1219:  58  7 52  0 57  7 51  0              211651.75900  211651.76979   -0.01079    0.01500   0.00091
 1220:  57 19 38  0 56 19 37  0              211707.52100  211707.53012   -0.00912    0.01500   0.00064
 1221:  57  7 50  0 56  7 49  0              213024.63900  213024.63359    0.00541    0.01500   0.00101
 1222:  57 14 44  0 56 14 43  0              213274.52700  213274.52518    0.00182    0.01500   0.00071
 1223:  57 14 43  0 56 14 42  0              213275.99000  213276.00534   -0.01534    0.01500   0.00071
 1224:  58 41 17  0 57 41 16  0              213942.12400  213942.13413   -0.01013    0.01500   0.00122
 1225:  58 40 18  0 57 40 17  0              213968.89700  213968.89477    0.00223    0.01500   0.00111
 1226:  58 39 19  0 57 39 18  0              213996.97900  213996.97706    0.00194    0.01500   0.00104
 1227:  58 38 20  0 57 38 19  0              214026.54700  214026.54327    0.00373    0.01500   0.00099
 1228:  58 37 21  0 57 37 20  0              214057.77600  214057.77806   -0.00206    0.01500   0.00096
 1229:  55  9 46  0 54  9 45  0              214070.03700  214070.04934   -0.01234    0.01500   0.00110
 1230:  58 36 22  0 57 36 21  0              214090.88300  214090.89229   -0.00929    0.01500   0.00095
 1231:  58 35 23  0 57 35 22  0              214126.13200  214126.12767    0.00433    0.01500   0.00094
 1232:  58 34 24  0 57 34 23  0              214163.76700  214163.76238    0.00462    0.01500   0.00094
 1233:  58 33 25  0 57 33 24  0              214204.13000  214204.11798    0.01202    0.01500   0.00094
 1234:  58 32 26  0 57 32 25  0              214247.57100  214247.56784    0.00316    0.01500   0.00093
 1235:  58 31 27  0 57 31 26  0              214294.54700  214294.54761   -0.00061    0.01500   0.00093
 1236:  58 30 28  0 57 30 27  0              214345.57000  214345.56829    0.00171    0.01500   0.00091
 1237:  65  0 65  0 64  0 64  0              214388.89000  214388.88743    0.00257    0.01500   0.00223
 1238:  64  1 63  0 63  1 62  0              214391.17000  214391.17307   -0.00307    0.01500   0.00169
 1239:  58 29 29  0 57 29 28  0              214401.23400  214401.23267    0.00133    0.01500   0.00090
 1240:  63  2 61  0 62  2 60  0              214402.53100  214402.52413    0.00687    0.01500   0.00131
 1241:  62  4 59  0 61  4 58  0              214434.05800  214434.05422    0.00378    0.01500   0.00109  214434.05767    0.00033 0.5000
 1242:  62  3 59  0 61  3 58  0              214434.05800  214434.06112   -0.00312    0.01500   0.00109  214434.05767    0.00033 0.5000
 1243:  58 28 30  0 57 28 29  0              214462.25000  214462.25611   -0.00611    0.01500   0.00088
 1244:  61  5 57  0 60  5 56  0              214504.77900  214504.75410    0.02490    0.01500   0.00099
 1245:  61  4 57  0 60  4 56  0              214504.99900  214504.99262    0.00638    0.01500   0.00099
 1246:  58 27 31  0 57 27 30  0              214529.48200  214529.49328   -0.01128    0.01500   0.00085
 1247:  57  9 49  0 56  9 48  0              214546.09100  214546.09388   -0.00288    0.01500   0.00090
 1248:  58 26 32  0 57 26 31  0              214603.97800  214603.97260    0.00540    0.01500   0.00083
 1249:  57 12 46  0 56 12 45  0              214623.73200  214623.73711   -0.00511    0.01500   0.00082
 1250:  60  6 55  0 59  6 54  0              214647.78600  214647.77475    0.01125    0.01500   0.00095
 1251:  60  5 55  0 59  5 54  0              214653.40500  214653.40332    0.00168    0.01500   0.00095
 1252:  58 25 33  0 57 25 32  0              214686.95000  214686.94155    0.00845    0.01500   0.00080
 1253:  57 12 45  0 56 12 44  0              214777.28100  214777.28102   -0.00002    0.01500   0.00084
 1254:  58 24 34  0 57 24 33  0              214779.93200  214779.92657    0.00543    0.01500   0.00077
 1255:  58 23 35  0 57 23 34  0              214884.82800  214884.81394    0.01406    0.01500   0.00074
 1256:  59  7 53  0 58  7 52  0              214902.85200  214902.84238    0.00962    0.01500   0.00095
 1257:  59  6 53  0 58  6 52  0              214993.20700  214993.18704    0.01996    0.01500   0.00095
 1258:  58 22 36  0 57 22 35  0              215003.96200  215003.96046    0.00154    0.01500   0.00071
 1259:  58 21 37  0 57 21 36  0              215140.34700  215140.34800   -0.00100    0.01500   0.00069
 1260:  58  8 51  0 57  8 50  0              215146.74800  215146.75697   -0.00897    0.01500   0.00094
 1261:  58 20 38  0 57 20 37  0              215297.80800  215297.80450    0.00350    0.01500   0.00067
 1262:  56 10 46  0 55 10 45  0              215343.36300  215343.36219    0.00081    0.01500   0.00128
 1263:  57 11 47  0 56 11 46  0              215430.61400  215430.60947    0.00453    0.01500   0.00087
 1264:  58 19 39  0 57 19 38  0              215481.33500  215481.32823    0.00677    0.01500   0.00066
 1265:  58 18 40  0 57 18 39  0              215697.59400  215697.57975    0.01425    0.01500   0.00066
 1266:  57 10 48  0 56 10 47  0              215701.30600  215701.29685    0.00915    0.01500   0.00089
 1267:  56  8 48  0 55  8 47  0              215780.14400  215780.13844    0.00556    0.01500   0.00103
 1268:  58 17 41  0 57 17 40  0              215955.66000  215955.65865    0.00135    0.01500   0.00067
 1269:  58  7 51  0 57  7 50  0              216062.79000  216062.78939    0.00061    0.01500   0.00103
 1270:  58 16 43  0 57 16 42  0              216268.39700  216268.38671    0.01029    0.01500   0.00069  216268.39225    0.00475 0.5000
 1271:  58 16 42  0 57 16 41  0              216268.39700  216268.39779   -0.00079    0.01500   0.00069  216268.39225    0.00475 0.5000
 1272:  57 11 46  0 56 11 45  0              216461.42400  216461.42568   -0.00168    0.01500   0.00105
 1273:  58 15 44  0 57 15 43  0              216654.62800  216654.54101    0.08699    0.01500   0.00071  216654.62856   -0.00056 0.5000
 1274:  58 15 43  0 57 15 42  0              216654.62800  216654.71611   -0.08811    0.01500   0.00071  216654.62856   -0.00056 0.5000
 1275:  58 14 45  0 57 14 44  0              217142.53100  217142.52621    0.00479    0.01500   0.00075
 1276:  58 14 44  0 57 14 43  0              217144.84500  217144.85173   -0.00673    0.01500   0.00075
 1277:  66  0 66  0 65  0 65  0              217659.42400  217659.41774    0.00626    0.01500   0.00234
 1278:  65  1 64  0 64  1 63  0              217661.58200  217661.58304   -0.00104    0.01500   0.00177
 1279:  64  2 62  0 63  2 61  0              217672.43600  217672.45032   -0.01432    0.01500   0.00138
 1280:  63  4 60  0 62  4 59  0              217702.61000  217702.61498   -0.00498    0.01500   0.00115  217702.61724   -0.00724 0.5000
 1281:  63  3 60  0 62  3 59  0              217702.61000  217702.61949   -0.00949    0.01500   0.00115  217702.61724   -0.00724 0.5000
 1282:  62  5 58  0 61  5 57  0              217770.09900  217770.00614    0.09286    0.01500   0.00104  217770.08613    0.01287 0.5000
 1283:  62  4 58  0 61  4 57  0              217770.09900  217770.16612   -0.06712    0.01500   0.00104  217770.08613    0.01287 0.5000
 1284:  58 13 46  0 57 13 45  0              217772.61600  217772.61948   -0.00348    0.01500   0.00081
 1285:  59 36 23  0 58 36 22  0              217796.15500  217796.16404   -0.00904    0.01500   0.00101
 1286:  58 13 45  0 57 13 44  0              217797.97900  217797.99103   -0.01203    0.01500   0.00081
 1287:  59 35 24  0 58 35 23  0              217833.02500  217833.02674   -0.00174    0.01500   0.00101
 1288:  59 34 25  0 58 34 24  0              217872.42700  217872.42279    0.00421    0.01500   0.00100
 1289:  61  6 56  0 60  6 55  0              217905.93300  217905.93915   -0.00615    0.01500   0.00099
 1290:  61  5 56  0 60  5 55  0              217909.82800  217909.83278   -0.00478    0.01500   0.00099
 1291:  59 33 26  0 58 33 25  0              217914.69400  217914.69101    0.00299    0.01500   0.00100
 1292:  59 32 27  0 58 32 26  0              217960.21600  217960.22489   -0.00889    0.01500   0.00099
 1293:  59 31 28  0 58 31 27  0              218009.47000  218009.48363   -0.01363    0.01500   0.00098
 1294:  58  9 50  0 57  9 49  0              218036.44900  218036.43721    0.01179    0.01500   0.00094
 1295:  59 30 29  0 58 30 28  0              218063.00300  218063.00600   -0.00300    0.01500   0.00096
 1296:  59 29 30  0 58 29 29  0              218121.43200  218121.42766    0.00434    0.01500   0.00094
 1297:  60  7 54  0 59  7 53  0              218152.76100  218152.77014   -0.00914    0.01500   0.00098
 1298:  56  9 47  0 55  9 46  0              218154.68400  218154.70802   -0.02402    0.01500   0.00111
 1299:  59 28 31  0 58 28 30  0              218185.50500  218185.50325    0.00175    0.01500   0.00092
 1300:  60  6 54  0 59  6 53  0              218217.80600  218217.80310    0.00290    0.01500   0.00099
 1301:  59 27 32  0 58 27 31  0              218256.14100  218256.13467    0.00633    0.01500   0.00089
 1302:  59 26 33  0 58 26 32  0              218334.40600  218334.40767   -0.00167    0.01500   0.00086
 1303:  59 25 34  0 58 25 33  0              218421.63500  218421.63990   -0.00490    0.01500   0.00083
 1304:  59  8 52  0 58  8 51  0              218433.79300  218433.79084    0.00216    0.01500   0.00098
 1305:  59 24 35  0 58 24 34  0              218519.44700  218519.44475    0.00225    0.01500   0.00080
 1306:  58 12 47  0 57 12 46  0              218567.64800  218567.64388    0.00412    0.01500   0.00087
 1307:  59 23 36  0 58 23 35  0              218629.82000  218629.81748    0.00252    0.01500   0.00077
 1308:  59 22 37  0 58 22 36  0              218755.25200  218755.25345   -0.00145    0.01500   0.00074
 1309:  58 12 46  0 57 12 45  0              218786.47600  218786.47077    0.00523    0.01500   0.00091
 1310:  57  8 49  0 56  8 48  0              218820.77700  218820.77472    0.00228    0.01500   0.00111
 1311:  59 21 38  0 58 21 37  0              218898.90300  218898.91375   -0.01075    0.01500   0.00072
 1312:  59 20 39  0 58 20 38  0              219064.86600  219064.86267    0.00333    0.01500   0.00070
 1313:  59  7 52  0 58  7 51  0              219135.70300  219135.69978    0.00322    0.01500   0.00105
 1314:  59 19 40  0 58 19 39  0              219258.41100  219258.41777   -0.00677    0.01500   0.00069
 1315:  58 11 48  0 57 11 47  0              219357.26400  219357.26584   -0.00184    0.01500   0.00092
 1316:  58 10 49  0 57 10 48  0              219462.00600  219462.00301    0.00299    0.01500   0.00094
 1317:  59 18 41  0 58 18 40  0              219486.68500  219486.68378    0.00122    0.01500   0.00069
 1318:  59 17 43  0 58 17 42  0              219759.40800  219759.40076    0.00724    0.01500   0.00070  219759.40129    0.00671 0.5000
 1319:  59 17 42  0 58 17 41  0              219759.40800  219759.40182    0.00618    0.01500   0.00070  219759.40129    0.00671 0.5000
 1320:  57 10 47  0 56 10 46  0              219849.62500  219849.61821    0.00679    0.01500   0.00138
 1321:  59 16 44  0 58 16 43  0              220090.36500  220090.36070    0.00430    0.01500   0.00072  220090.37007   -0.00507 0.5000
 1322:  59 16 43  0 58 16 42  0              220090.36500  220090.37944   -0.01444    0.01500   0.00072  220090.37007   -0.00507 0.5000
 1323:  59 15 45  0 58 15 44  0              220499.88300  220499.86539    0.01761    0.01500   0.00075
 1324:  59 15 44  0 58 15 43  0              220500.15000  220500.14958    0.00042    0.01500   0.00075
 1325:  58 11 47  0 57 11 46  0              220726.84500  220726.86275   -0.01775    0.01500   0.00117
 1326:  67  0 67  0 66  0 66  0              220929.82200  220929.83181   -0.00981    0.01500   0.00245
 1327:  66  1 65  0 65  1 64  0              220931.87600  220931.88257   -0.00657    0.01500   0.00186
 1328:  65  2 63  0 64  2 62  0              220942.29500  220942.29156    0.00344    0.01500   0.00145
 1329:  64  4 61  0 63  4 60  0              220971.17300  220971.17088    0.00212    0.01500   0.00121  220971.17235    0.00065 0.5000
 1330:  64  3 61  0 63  3 60  0              220971.17300  220971.17382   -0.00082    0.01500   0.00121  220971.17235    0.00065 0.5000
 1331:  59 14 46  0 58 14 45  0              221018.60300  221018.61042   -0.00742    0.01500   0.00080
 1332:  59 14 45  0 58 14 44  0              221022.22500  221022.22723   -0.00223    0.01500   0.00080
 1333:  63  5 59  0 62  5 58  0              221035.52700  221035.46682    0.06018    0.01500   0.00108  221035.52034    0.00666 0.5000
 1334:  63  4 59  0 62  4 58  0              221035.52700  221035.57387   -0.04687    0.01500   0.00108  221035.52034    0.00666 0.5000
 1335:  60 50 10  0 59 50  9  0              221123.62300  221123.61059    0.01241    0.01500   0.00386
 1336:  60 49 11  0 59 49 10  0              221144.77400  221144.77824   -0.00424    0.01500   0.00341
 1337:  62  6 57  0 61  6 56  0              221164.70800  221164.70077    0.00723    0.01500   0.00104
 1338:  60 48 12  0 59 48 11  0              221166.48600  221166.48690   -0.00090    0.01500   0.00300
 1339:  62  5 57  0 61  5 56  0              221167.38700  221167.38541    0.00159    0.01500   0.00104
 1340:  60 47 13  0 59 47 12  0              221188.80700  221188.80092    0.00608    0.01500   0.00263
 1341:  60 46 14  0 59 46 13  0              221211.80200  221211.79171    0.01029    0.01500   0.00231
 1342:  60 45 15  0 59 45 14  0              221235.53100  221235.53861   -0.00761    0.01500   0.00203
 1343:  60 44 16  0 59 44 15  0              221260.13700  221260.13009    0.00691    0.01500   0.00179
 1344:  60 43 17  0 59 43 16  0              221285.66400  221285.66500   -0.00100    0.01500   0.00159
 1345:  60 42 18  0 59 42 17  0              221312.25500  221312.25409    0.00091    0.01500   0.00143
 1346:  60 41 19  0 59 41 18  0              221340.01900  221340.02184   -0.00284    0.01500   0.00130
 1347:  60 40 20  0 59 40 19  0              221369.10100  221369.10849   -0.00749    0.01500   0.00122
 1348:  60 39 21  0 59 39 20  0              221399.66500  221399.67261   -0.00761    0.01500   0.00116
 1349:  61  7 55  0 60  7 54  0              221402.22900  221402.22598    0.00302    0.01500   0.00102
 1350:  60 38 22  0 59 38 21  0              221431.89100  221431.89403   -0.00303    0.01500   0.00112
 1351:  61  6 55  0 60  6 54  0              221448.79900  221448.79962   -0.00062    0.01500   0.00103
 1352:  60 37 23  0 59 37 22  0              221465.98800  221465.97740    0.01060    0.01500   0.00109
 1353:  59  9 51  0 58  9 50  0              221487.12200  221487.12556   -0.00356    0.01500   0.00099
 1354:  60 36 24  0 59 36 23  0              221502.16700  221502.15649    0.01051    0.01500   0.00108
 1355:  60 35 25  0 59 35 24  0              221540.70600  221540.69931    0.00669    0.01500   0.00107
 1356:  60 34 26  0 59 34 25  0              221581.91700  221581.91438    0.00262    0.01500   0.00107
 1357:  60 33 27  0 59 33 26  0              221626.15500  221626.15845   -0.00345    0.01500   0.00106
 1358:  60 32 28  0 59 32 27  0              221673.85400  221673.84586    0.00814    0.01500   0.00105
 1359:  59 13 47  0 58 13 46  0              221688.19100  221688.19038    0.00062    0.01500   0.00086
 1360:  60  8 53  0 59  8 52  0              221707.79500  221707.79717   -0.00217    0.01500   0.00102
 1361:  60 31 29  0 59 31 28  0              221725.45500  221725.46029   -0.00529    0.01500   0.00103
 1362:  59 13 46  0 58 13 45  0              221725.88300  221725.88426   -0.00126    0.01500   0.00086
 1363:  58  8 50  0 57  8 49  0              221780.70900  221780.71569   -0.00669    0.01500   0.00118
 1364:  60 30 30  0 59 30 29  0              221781.57400  221781.56931    0.00469    0.01500   0.00101
 1365:  60 29 31  0 59 29 30  0              221842.84800  221842.84278    0.00522    0.01500   0.00099
 1366:  60 28 32  0 59 28 31  0              221910.07900  221910.07618    0.00282    0.01500   0.00096
 1367:  60 27 33  0 59 27 32  0              221984.21700  221984.22056   -0.00356    0.01500   0.00093
 1368:  60 26 34  0 59 26 33  0              222066.42500  222066.42137    0.00363    0.01500   0.00090
 1369:  57  9 48  0 56  9 47  0              222092.06400  222092.06505   -0.00105    0.01500   0.00112
 1370:  60 25 35  0 59 25 34  0              222158.06800  222158.06951   -0.00151    0.01500   0.00086
 1371:  60  7 53  0 59  7 52  0              222240.03300  222240.03682   -0.00382    0.01500   0.00108
 1372:  60 24 36  0 59 24 35  0              222260.86800  222260.86916   -0.00116    0.01500   0.00083
 1373:  60 23 37  0 59 23 36  0              222376.92200  222376.92961   -0.00761    0.01500   0.00080
 1374:  60 22 38  0 59 22 37  0              222508.89500  222508.89156    0.00344    0.01500   0.00077
 1375:  59 12 48  0 58 12 47  0              222517.83800  222517.84846   -0.01046    0.01500   0.00093
 1376:  60 21 39  0 59 21 38  0              222660.10100  222660.10451   -0.00351    0.01500   0.00074
 1377:  59 12 47  0 58 12 46  0              222826.20500  222826.20077    0.00423    0.01500   0.00099
 1378:  60 20 40  0 59 20 39  0              222834.88000  222834.88206   -0.00206    0.01500   0.00073
 1379:  60 19 41  0 59 19 40  0              223038.86500  223038.88002   -0.01502    0.01500   0.00072
 1380:  59 10 50  0 58 10 49  0              223183.15400  223183.14698    0.00702    0.01500   0.00099
 1381:  59 11 49  0 58 11 48  0              223271.26000  223271.25513    0.00487    0.01500   0.00098
 1382:  60 18 42  0 59 18 41  0              223279.68100  223279.67620    0.00480    0.01500   0.00072
 1383:  60 17 44  0 59 17 43  0              223567.70000  223567.69804    0.00196    0.01500   0.00073  223567.69896    0.00104 0.5000
 1384:  60 17 43  0 59 17 42  0              223567.70000  223567.69988    0.00012    0.01500   0.00073  223567.69896    0.00104 0.5000
 1385:  60 16 45  0 59 16 44  0              223917.77800  223917.78425   -0.00625    0.01500   0.00076  223917.79993   -0.02193 0.5000
 1386:  60 16 44  0 59 16 43  0              223917.77800  223917.81561   -0.03761    0.01500   0.00076  223917.79993   -0.02193 0.5000
 1387:  68  0 68  0 67  0 67  0              224200.13000  224200.12787    0.00213    0.01500   0.00256
 1388:  67  1 66  0 66  1 65  0              224202.06200  224202.06950   -0.00750    0.01500   0.00195
 1389:  66  2 64  0 65  2 63  0              224212.01900  224212.04386   -0.02486    0.01500   0.00153
 1390:  65  4 62  0 64  4 61  0              224239.72100  224239.71170    0.00930    0.01500   0.00127  224239.71266    0.00834 0.5000
 1391:  65  3 62  0 64  3 61  0              224239.72100  224239.71362    0.00738    0.01500   0.00127  224239.71266    0.00834 0.5000
 1392:  58 10 48  0 57 10 47  0              224349.25300  224349.25591   -0.00291    0.01500   0.00147
 1393:  60 15 46  0 59 15 45  0              224351.88600  224351.89061   -0.00461    0.01500   0.00080
 1394:  60 15 45  0 59 15 44  0              224352.34200  224352.34719   -0.00519    0.01500   0.00080
 1395:  63  6 58  0 62  6 57  0              224424.04700  224424.03663    0.01037    0.01500   0.00108
 1396:  63  5 58  0 62  5 57  0              224425.88500  224425.88193    0.00307    0.01500   0.00108
 1397:  62  7 56  0 61  7 55  0              224651.68600  224651.69412   -0.00812    0.01500   0.00107
 1398:  62  6 56  0 61  6 55  0              224684.88500  224684.88951   -0.00451    0.01500   0.00107
 1399:  59  8 51  0 58  8 50  0              224691.86300  224691.85456    0.00844    0.01500   0.00124
 1400:  60  9 52  0 59  9 51  0              224901.05300  224901.04945    0.00355    0.01500   0.00105
 1401:  60 14 47  0 59 14 46  0              224903.09500  224903.08984    0.00516    0.01500   0.00085
 1402:  61 46 15  0 60 46 14  0              224906.43200  224906.41043    0.02157    0.01500   0.00232
 1403:  60 14 46  0 59 14 45  0              224908.66000  224908.65930    0.00070    0.01500   0.00085
 1404:  61 45 16  0 60 45 15  0              224931.06900  224931.06785    0.00115    0.01500   0.00205
 1405:  61 44 17  0 60 44 16  0              224956.61400  224956.61962   -0.00562    0.01500   0.00182
 1406:  61  8 54  0 60  8 53  0              224971.69000  224971.69367   -0.00367    0.01500   0.00107
 1407:  61 43 18  0 60 43 17  0              224983.16800  224983.16962   -0.00162    0.01500   0.00163
 1408:  61 42 19  0 60 42 18  0              225010.82000  225010.83429   -0.01429    0.01500   0.00148
 1409:  61 41 20  0 60 41 19  0              225039.74600  225039.74444    0.00156    0.01500   0.00137
 1410:  59 11 48  0 58 11 47  0              225061.18500  225061.19108   -0.00608    0.01500   0.00132
 1411:  61 40 21  0 60 40 20  0              225070.01700  225070.04752   -0.03052    0.03000   0.00129
 1412:  61 39 22  0 60 39 21  0              225101.91200  225101.91023    0.00177    0.01500   0.00123
 1413:  61 38 23  0 60 38 22  0              225135.53800  225135.52165    0.01635    0.01500   0.00119
 1414:  61 37 24  0 60 37 23  0              225171.07300  225171.09698   -0.02398    0.01500   0.00117
 1415:  61 36 25  0 60 36 24  0              225208.87600  225208.88205   -0.00605    0.01500   0.00116
 1416:  61 35 26  0 60 35 25  0              225249.13500  225249.15873   -0.02373    0.01500   0.00115
 1417:  61 34 27  0 60 34 26  0              225292.25900  225292.25158    0.00742    0.01500   0.00114
 1418:  61 33 28  0 60 33 27  0              225338.52900  225338.53590   -0.00690    0.01500   0.00113
 1419:  61  7 54  0 60  7 53  0              225371.58300  225371.58138    0.00162    0.01500   0.00111
 1420:  61 32 29  0 60 32 28  0              225388.44200  225388.44769   -0.00569    0.01500   0.00111
 1421:  61 31 30  0 60 31 29  0              225442.49700  225442.49600    0.00100    0.01500   0.00109
 1422:  61 30 31  0 60 30 30  0              225501.28400  225501.27834    0.00566    0.01500   0.00107
 1423:  61 29 32  0 60 29 31  0              225565.50500  225565.50006    0.00494    0.01500   0.00104
 1424:  60 13 48  0 59 13 47  0              225613.36500  225613.36706   -0.00206    0.01500   0.00092
 1425:  61 28 33  0 60 28 32  0              225636.00500  225635.99910    0.00590    0.01500   0.00101
 1426:  60 13 47  0 59 13 46  0              225668.79300  225668.80269   -0.00969    0.01500   0.00093
 1427:  61 27 34  0 60 27 33  0              225713.77100  225713.77768   -0.00668    0.01500   0.00097
 1428:  61 26 35  0 60 26 34  0              225800.03200  225800.04344   -0.01144    0.01500   0.00094
 1429:  58  9 49  0 57  9 48  0              225871.22800  225871.23186   -0.00386    0.01500   0.00114
 1430:  61 25 36  0 60 25 35  0              225896.27100  225896.26365    0.00735    0.01500   0.00090
 1431:  61 24 37  0 60 24 36  0              226004.21400  226004.23734   -0.02334    0.01500   0.00086
 1432:  61 23 38  0 60 23 37  0              226126.20300  226126.19313    0.00987    0.01500   0.00083
 1433:  61 22 39  0 60 22 38  0              226264.91600  226264.92412   -0.00812    0.01500   0.00080
 1434:  61 21 40  0 60 21 39  0              226423.98000  226423.97798    0.00202    0.01500   0.00077
 1435:  60 12 49  0 59 12 48  0              226472.54600  226472.54236    0.00364    0.01500   0.00099
 1436:  61 20 41  0 60 20 40  0              226607.93200  226607.93144    0.00056    0.01500   0.00076
 1437:  61 19 42  0 60 19 41  0              226822.80200  226822.79882    0.00318    0.01500   0.00075
 1438:  60 10 51  0 59 10 50  0              226862.02800  226862.03491   -0.00691    0.01500   0.00104
 1439:  60 12 48  0 59 12 47  0              226902.03200  226902.03329   -0.00129    0.01500   0.00108
 1440:  61 18 43  0 60 18 42  0              227076.66800  227076.66226    0.00574    0.01500   0.00076
 1441:  60 11 50  0 59 11 49  0              227167.78300  227167.78318   -0.00018    0.01500   0.00104
 1442:  61 17 45  0 60 17 44  0              227380.69300  227380.68708    0.00592    0.01500   0.00077  227380.68866    0.00434 0.5000
 1443:  61 17 44  0 60 17 43  0              227380.69300  227380.69024    0.00276    0.01500   0.00077  227380.68866    0.00434 0.5000
 1444:  69  0 69  0 68  0 68  0              227470.30700  227470.30412    0.00288    0.01500   0.00268
 1445:  68  1 67  0 67  1 66  0              227472.14300  227472.14169    0.00131    0.01500   0.00205
 1446:  67  2 65  0 66  2 64  0              227481.70400  227481.70344    0.00056    0.01500   0.00161
 1447:  66  4 63  0 65  4 62  0              227508.22800  227508.22802   -0.00002    0.01500   0.00134  227508.22864   -0.00064 0.5000
 1448:  66  3 63  0 65  3 62  0              227508.22800  227508.22927   -0.00127    0.01500   0.00134  227508.22864   -0.00064 0.5000
 1449:  65  5 61  0 64  5 60  0              227566.93100  227566.90901    0.02199    0.01500   0.00119  227566.93283   -0.00183 0.5000
 1450:  65  4 61  0 64  4 60  0              227566.93100  227566.95664   -0.02564    0.01500   0.00119  227566.93283   -0.00183 0.5000
 1451:  60  8 52  0 59  8 51  0              227584.54200  227584.54444   -0.00244    0.01500   0.00129
 1452:  64  6 59  0 63  6 58  0              227683.90600  227683.91406   -0.00806    0.01500   0.00113
 1453:  64  5 59  0 63  5 58  0              227685.17400  227685.17868   -0.00468    0.01500   0.00113
 1454:  61 16 46  0 60 16 45  0              227750.87000  227750.84457    0.02543    0.01500   0.00080  227750.87054   -0.00054 0.5000
 1455:  61 16 45  0 60 16 44  0              227750.87000  227750.89651   -0.02651    0.01500   0.00080  227750.87054   -0.00054 0.5000
 1456:  63  7 57  0 62  7 56  0              227901.49400  227901.51024   -0.01624    0.01500   0.00111
 1457:  63  6 57  0 62  6 56  0              227925.07000  227925.06519    0.00481    0.01500   0.00112
 1458:  61 15 47  0 60 15 46  0              228210.88400  228210.87874    0.00526    0.01500   0.00085
 1459:  61 15 46  0 60 15 45  0              228211.59600  228211.60507   -0.00907    0.01500   0.00085
 1460:  61  9 53  0 60  9 52  0              228281.63200  228281.63283   -0.00083    0.01500   0.00110
 1461:  62 51 11  0 61 51 10  0              228484.56300  228484.54357    0.01943    0.03000   0.00436
 1462:  62 50 12  0 61 50 11  0              228506.72400  228506.68846    0.03554    0.03000   0.00386
 1463:  62  7 55  0 61  7 54  0              228525.99200  228525.99485   -0.00285    0.01500   0.00115
 1464:  62 49 13  0 61 49 12  0              228529.38500  228529.38012    0.00488    0.03000   0.00342
 1465:  62 47 15  0 61 47 14  0              228576.66200  228576.66723   -0.00523    0.03000   0.00266
 1466:  62 46 16  0 61 46 15  0              228601.42200  228601.41244    0.00956    0.03000   0.00235
 1467:  62 45 17  0 61 45 16  0              228626.99100  228627.00593   -0.01493    0.03000   0.00209
 1468:  62 44 18  0 61 44 17  0              228653.53800  228653.54532   -0.00732    0.03000   0.00187
 1469:  62 43 19  0 61 43 18  0              228681.14700  228681.13972    0.00728    0.01500   0.00169
 1470:  62 42 20  0 61 42 19  0              228709.90600  228709.91141   -0.00541    0.01500   0.00155
 1471:  62 41 21  0 61 41 20  0              228739.97900  228739.99779   -0.01879    0.01500   0.00144
 1472:  62 40 22  0 61 40 21  0              228771.56700  228771.55374    0.01326    0.01500   0.00137
 1473:  61 14 47  0 60 14 46  0              228804.75000  228804.76474   -0.01474    0.01500   0.00077  228804.75957   -0.00957 0.5000
 1474:  62 39 23  0 61 39 22  0              228804.75000  228804.75439   -0.00439    0.01500   0.00077  228804.75957   -0.00957 0.5000
 1475:  59 10 49  0 58 10 48  0              228807.08000  228807.07869    0.00131    0.01500   0.00154
 1476:  62 38 24  0 61 38 23  0              228839.80400  228839.79840    0.00560    0.01500   0.00128
 1477:  62 37 25  0 61 37 24  0              228876.92000  228876.91186    0.00814    0.01500   0.00126
 1478:  62 36 26  0 61 36 25  0              228916.34600  228916.35311   -0.00711    0.01500   0.00124
 1479:  62 35 27  0 61 35 26  0              228958.41400  228958.41839   -0.00439    0.01500   0.00123
 1480:  62 34 28  0 61 34 27  0              229003.44100  229003.44884   -0.00784    0.01500   0.00121
 1481:  62 33 29  0 61 33 28  0              229051.84900  229051.83902    0.00998    0.01500   0.00120
 1482:  62 32 30  0 61 32 29  0              229104.04800  229104.04737    0.00063    0.01500   0.00118
 1483:  62 31 31  0 61 31 30  0              229160.60300  229160.60927   -0.00627    0.01500   0.00115
 1484:  62 30 32  0 61 30 31  0              229222.15700  229222.15327    0.00373    0.01500   0.00113
 1485:  62 29 33  0 61 29 32  0              229289.42400  229289.42162    0.00238    0.01500   0.00109
 1486:  62 28 34  0 61 28 33  0              229363.29800  229363.29639    0.00161    0.01500   0.00106
 1487:  62 27 35  0 61 27 34  0              229444.82900  229444.83302   -0.00402    0.01500   0.00102
 1488:  60 11 49  0 59 11 48  0              229465.56700  229465.55431    0.01269    0.01500   0.00148
 1489:  59  9 50  0 58  9 49  0              229486.57900  229486.58779   -0.00879    0.01500   0.00118
 1490:  62 26 36  0 61 26 35  0              229535.30200  229535.30392   -0.00192    0.01500   0.00098
 1491:  61 13 49  0 60 13 48  0              229548.02900  229548.01919    0.00981    0.01500   0.00098
 1492:  61 13 48  0 60 13 47  0              229628.72100  229628.72800   -0.00700    0.01500   0.00100
 1493:  62 25 37  0 61 25 36  0              229636.26900  229636.25601    0.01299    0.01500   0.00094
 1494:  62 24 38  0 61 24 37  0              229749.58600  229749.58737   -0.00137    0.01500   0.00090
 1495:  62 23 39  0 61 23 38  0              229877.64900  229877.65152   -0.00252    0.01500   0.00086
 1496:  62 22 40  0 61 22 39  0              230023.40700  230023.40142    0.00558    0.01500   0.00083
 1497:  62 21 41  0 61 21 40  0              230190.58900  230190.59320   -0.00420    0.01500   0.00081
 1498:  62 20 42  0 61 20 41  0              230384.08700  230384.08144    0.00556    0.01500   0.00079
 1499:  61 12 50  0 60 12 49  0              230429.39800  230429.39461    0.00339    0.01500   0.00106
 1500:  61  8 53  0 60  8 52  0              230483.86000  230483.85609    0.00391    0.01500   0.00132
 1501:  61 10 52  0 60 10 51  0              230496.89700  230496.89228    0.00472    0.01500   0.00110
 1502:  62 19 43  0 61 19 42  0              230610.26600  230610.26074    0.00526    0.01500   0.00079
 1503:  70  0 70  0 69  0 69  0              230740.36200  230740.35878    0.00322    0.01500   0.00281
 1504:  69  1 68  0 68  1 67  0              230742.09800  230742.09705    0.00095    0.01500   0.00216
 1505:  68  2 66  0 67  2 65  0              230751.27200  230751.26668    0.00532    0.01500   0.00170
 1506:  67  3 64  0 66  3 63  0              230776.70900  230776.71191   -0.00291    0.01500   0.00141
 1507:  66  5 62  0 65  5 61  0              230832.86000  230832.84259    0.01741    0.01500   0.00126  230832.85843    0.00157 0.5000
 1508:  66  4 62  0 65  4 61  0              230832.86000  230832.87426   -0.01426    0.01500   0.00126  230832.85843    0.00157 0.5000
 1509:  62 18 44  0 61 18 43  0              230877.75100  230877.75140   -0.00040    0.01500   0.00080
 1510:  65  6 60  0 64  6 59  0              230944.29400  230944.29499   -0.00099    0.01500   0.00119
 1511:  65  5 60  0 64  5 59  0              230945.15500  230945.15923   -0.00423    0.01500   0.00119
 1512:  61 12 49  0 60 12 48  0              231020.47700  231020.47491    0.00209    0.01500   0.00119
 1513:  61 11 51  0 60 11 50  0              231041.89900  231041.88719    0.01181    0.01500   0.00110
 1514:  64  7 58  0 63  7 57  0              231151.90000  231151.89583    0.00417    0.01500   0.00116
 1515:  64  6 58  0 63  6 57  0              231168.53700  231168.54042   -0.00342    0.01500   0.00117
 1516:  62 17 46  0 61 17 45  0              231198.51500  231198.51171    0.00329    0.01500   0.00082  231198.51441    0.00059 0.5000
 1517:  62 17 45  0 61 17 44  0              231198.51500  231198.51711   -0.00211    0.01500   0.00082  231198.51441    0.00059 0.5000
 1518:  63  8 56  0 62  8 55  0              231478.79800  231478.79016    0.00784    0.01500   0.00117
 1519:  62 16 47  0 61 16 46  0              231589.77700  231589.73953    0.03747    0.01500   0.00085  231589.78211   -0.00511 0.5000
 1520:  62 16 46  0 61 16 45  0              231589.77700  231589.82469   -0.04769    0.01500   0.00085  231589.78211   -0.00511 0.5000
 1521:  62  9 54  0 61  9 53  0              231632.64800  231632.64851   -0.00051    0.01500   0.00116
 1522:  63  7 56  0 62  7 55  0              231699.25600  231699.24858    0.00742    0.01500   0.00119
 1523:  62 15 48  0 61 15 47  0              232077.10200  232077.10536   -0.00336    0.01500   0.00090
 1524:  62 15 47  0 61 15 46  0              232078.23800  232078.24968   -0.01168    0.01500   0.00090
 1525:  63 52 11  0 62 52 10  0              232153.40900  232153.38951    0.01949    0.03000   0.00491
 1526:  63 51 12  0 62 51 11  0              232175.76700  232175.77314   -0.00614    0.03000   0.00437
 1527:  63 50 13  0 62 50 12  0              232198.65100  232198.67632   -0.02532    0.03000   0.00388
 1528:  63 49 14  0 62 49 13  0              232222.15100  232222.16000   -0.00900    0.03000   0.00344
 1529:  63 48 15  0 62 48 14  0              232246.26700  232246.29148   -0.02448    0.03000   0.00304
 1530:  63 47 16  0 62 47 15  0              232271.14900  232271.14526    0.00374    0.03000   0.00270
 1531:  63 46 17  0 62 46 16  0              232296.79500  232296.80397   -0.00897    0.01500   0.00240
 1532:  63 45 18  0 62 45 17  0              232323.34400  232323.35951   -0.01551    0.01500   0.00214
 1533:  63 44 19  0 62 44 18  0              232350.92400  232350.91432    0.00968    0.01500   0.00193
 1534:  63 43 20  0 62 43 19  0              232379.58000  232379.58290   -0.00290    0.01500   0.00176
 1535:  63 42 21  0 62 42 20  0              232409.48300  232409.49359   -0.01059    0.01500   0.00163
 1536:  63 41 22  0 62 41 21  0              232440.79500  232440.79059    0.00441    0.01500   0.00153
 1537:  63 40 23  0 62 40 22  0              232473.63700  232473.63649    0.00051    0.01500   0.00146
 1538:  63 39 24  0 62 39 23  0              232508.20000  232508.21512   -0.01512    0.01500   0.00141
 1539:  63 38 25  0 62 38 24  0              232544.73600  232544.73502    0.00098    0.01500   0.00138
 1540:  63 37 26  0 62 37 25  0              232583.43800  232583.43360    0.00440    0.01500   0.00135
 1541:  63 36 27  0 62 36 26  0              232624.58500  232624.58213    0.00287    0.01500   0.00133
 1542:  63 35 28  0 62 35 27  0              232668.49400  232668.49172    0.00228    0.01500   0.00132
 1543:  62 14 49  0 61 14 48  0              232698.44300  232698.44780   -0.00480    0.01500   0.00097
 1544:  62 14 48  0 61 14 47  0              232711.27700  232711.27485    0.00215    0.01500   0.00097
 1545:  63 34 29  0 62 34 28  0              232715.51700  232715.52069   -0.00369    0.01500   0.00130
 1546:  63 33 30  0 62 33 29  0              232766.08900  232766.08353    0.00547    0.01500   0.00128
 1547:  63 32 31  0 62 32 30  0              232820.66100  232820.66198   -0.00098    0.01500   0.00125
 1548:  63 31 32  0 62 31 31  0              232879.81100  232879.81868   -0.00768    0.01500   0.00122
 1549:  60  9 51  0 59  9 50  0              232938.08100  232938.08210   -0.00110    0.01500   0.00123
 1550:  63 30 33  0 62 30 32  0              232944.22100  232944.21442    0.00658    0.01500   0.00119
 1551:  63 29 34  0 62 29 33  0              233014.62500  233014.62976   -0.00476    0.01500   0.00115
 1552:  63 28 35  0 62 28 34  0              233091.99200  233091.99262   -0.00062    0.01500   0.00111
 1553:  63 27 36  0 62 27 35  0              233177.41400  233177.41379    0.00021    0.01500   0.00107
 1554:  60 10 50  0 59 10 49  0              233187.89600  233187.90336   -0.00736    0.01500   0.00158
 1555:  63 26 37  0 62 26 36  0              233272.23700  233272.23315    0.00385    0.01500   0.00102
 1556:  63 25 38  0 62 25 37  0              233378.08300  233378.08064    0.00236    0.01500   0.00098
 1557:  62  8 54  0 61  8 53  0              233407.53700  233407.53832   -0.00132    0.01500   0.00135
 1558:  62 13 50  0 61 13 49  0              233491.80700  233491.80867   -0.00167    0.01500   0.00106
 1559:  63 24 39  0 62 24 38  0              233496.95600  233496.95785   -0.00185    0.01500   0.00094
 1560:  62 13 49  0 61 13 48  0              233608.13500  233608.13187    0.00313    0.01500   0.00108
 1561:  63 23 40  0 62 23 39  0              233631.34900  233631.34896    0.00004    0.01500   0.00090
 1562:  63 22 41  0 62 22 40  0              233784.37700  233784.37471    0.00229    0.01500   0.00087
 1563:  61 11 50  0 60 11 49  0              233934.89600  233934.88965    0.00635    0.01500   0.00166
 1564:  63 21 42  0 62 21 41  0              233960.01700  233960.01059    0.00641    0.01500   0.00085
 1565:  71  0 71  0 70  0 70  0              234010.29600  234010.29009    0.00591    0.01500   0.00294
 1566:  70  1 69  0 69  1 68  0              234011.93900  234011.93350    0.00550    0.01500   0.00228
 1567:  69  2 67  0 68  2 66  0              234020.73000  234020.73014   -0.00014    0.01500   0.00180
 1568:  68  3 65  0 67  3 64  0              234045.16600  234045.15335    0.01265    0.01500   0.00150
 1569:  62 10 53  0 61 10 52  0              234086.92700  234086.92795   -0.00095    0.01500   0.00116
 1570:  67  5 63  0 66  5 62  0              234098.90400  234098.88885    0.01515    0.01500   0.00133  234098.89936    0.00464 0.5000
 1571:  67  4 63  0 66  4 62  0              234098.90400  234098.90987   -0.00587    0.01500   0.00133  234098.89936    0.00464 0.5000
 1572:  63 20 43  0 62 20 42  0              234163.41000  234163.40469    0.00531    0.01500   0.00083
 1573:  66  6 61  0 65  6 60  0              234205.13600  234205.13893   -0.00293    0.01500   0.00125
 1574:  66  5 61  0 65  5 60  0              234205.72600  234205.72796   -0.00196    0.01500   0.00125
 1575:  62 12 51  0 61 12 50  0              234385.52000  234385.51805    0.00195    0.01500   0.00114
 1576:  63 19 44  0 62 19 43  0              234401.35300  234401.35530   -0.00230    0.01500   0.00083
 1577:  65  7 59  0 64  7 58  0              234402.98900  234402.98659    0.00241    0.01500   0.00122
 1578:  65  6 59  0 64  6 58  0              234414.70900  234414.70200    0.00700    0.01500   0.00122
 1579:  63 18 45  0 62 18 44  0              234683.04900  234683.05758   -0.00858    0.01500   0.00084
 1580:  64  8 57  0 63  8 56  0              234725.80000  234725.80479   -0.00479    0.01500   0.00122
 1581:  64  7 57  0 63  7 56  0              234887.82000  234887.81950    0.00050    0.01500   0.00124
 1582:  62 11 52  0 61 11 51  0              234888.62000  234888.62504   -0.00504    0.01500   0.00116
 1583:  63  9 55  0 62  9 54  0              234958.02700  234958.03177   -0.00477    0.01500   0.00122
 1584:  63 17 47  0 62 17 46  0              235021.32700  235021.32299    0.00401    0.01500   0.00087  235021.32754   -0.00054 0.5000
 1585:  63 17 46  0 62 17 45  0              235021.32700  235021.33209   -0.00509    0.01500   0.00087  235021.32754   -0.00054 0.5000
 1586:  62 12 50  0 61 12 49  0              235188.82700  235188.82479    0.00221    0.01500   0.00133
 1587:  63 16 48  0 62 16 47  0              235434.74600  235434.67847    0.06753    0.01500   0.00091  235434.74761   -0.00161 0.5000
 1588:  63 16 47  0 62 16 46  0              235434.74600  235434.81675   -0.07075    0.01500   0.00091  235434.74761   -0.00161 0.5000
 1589:  64 53 11  0 63 53 10  0              235821.50500  235821.52432   -0.01932    0.03000   0.00551
 1590:  64 52 12  0 63 52 11  0              235844.18100  235844.15994    0.02106    0.03000   0.00492
 1591:  64 51 13  0 63 51 12  0              235867.27000  235867.28911   -0.01911    0.03000   0.00439
 1592:  64 50 14  0 63 50 13  0              235890.95900  235890.96983   -0.01083    0.03000   0.00390
 1593:  64 49 15  0 63 49 14  0              235915.23700  235915.26597   -0.02897    0.03000   0.00347
 1594:  64 48 16  0 63 48 15  0              235940.22300  235940.24810   -0.02510    0.03000   0.00308
 1595:  63 15 49  0 62 15 48  0              235950.86300  235950.85868    0.00432    0.01500   0.00097
 1596:  63 15 48  0 62 15 47  0              235952.64000  235952.64453   -0.00453    0.01500   0.00097
 1597:  64 47 17  0 63 47 16  0              235965.98600  235965.99430   -0.00830    0.03000   0.00274
 1598:  64 46 18  0 63 46 17  0              235992.61000  235992.59122    0.01878    0.03000   0.00245
 1599:  64 45 19  0 63 45 18  0              236020.13300  236020.13522   -0.00222    0.01500   0.00221
 1600:  64 44 20  0 63 44 19  0              236048.75600  236048.73371    0.02229    0.01500   0.00201
 1601:  64 43 21  0 63 43 20  0              236078.51300  236078.50676    0.00624    0.01500   0.00184
 1602:  64 42 22  0 63 42 21  0              236109.58000  236109.58897   -0.00897    0.01500   0.00172
 1603:  64 41 23  0 63 41 22  0              236142.12800  236142.13158   -0.00358    0.01500   0.00163
 1604:  64 40 24  0 63 40 23  0              236176.29300  236176.30512   -0.01212    0.01500   0.00156
 1605:  64 39 25  0 63 39 24  0              236212.30300  236212.30242    0.00058    0.01500   0.00151
 1606:  61  9 52  0 60  9 51  0              236232.24500  236232.25113   -0.00613    0.01500   0.00131
 1607:  64 38 26  0 63 38 25  0              236250.34000  236250.34228   -0.00228    0.01500   0.00148
 1608:  64 37 27  0 63 37 26  0              236290.67100  236290.67379   -0.00279    0.01500   0.00145
 1609:  64 36 28  0 63 36 27  0              236333.58200  236333.58158    0.00042    0.01500   0.00143
 1610:  63  8 55  0 62  8 54  0              236365.89000  236365.89020   -0.00020    0.01500   0.00138
 1611:  64 35 29  0 63 35 28  0              236379.39300  236379.39217    0.00083    0.01500   0.00141
 1612:  64 34 30  0 63 34 29  0              236428.48700  236428.48167    0.00533    0.01500   0.00139
 1613:  64 33 31  0 63 33 30  0              236481.28800  236481.28522    0.00278    0.01500   0.00136
 1614:  64 32 32  0 63 32 31  0              236538.28700  236538.30865   -0.02165    0.01500   0.00133
 1615:  64 31 33  0 63 31 32  0              236600.14600  236600.14292    0.00308    0.01500   0.00129
 1616:  63 14 50  0 62 14 49  0              236609.88400  236609.87813    0.00587    0.01500   0.00104
 1617:  63 14 49  0 62 14 48  0              236629.06800  236629.06813   -0.00013    0.01500   0.00105
 1618:  64 30 34  0 63 30 33  0              236667.49800  236667.48225    0.01575    0.01500   0.00126
 1619:  64 29 35  0 63 29 34  0              236741.14600  236741.14694   -0.00094    0.01500   0.00121
 1620:  64 28 36  0 63 28 35  0              236822.11300  236822.11256    0.00044    0.01500   0.00117
 1621:  64 27 37  0 63 27 36  0              236911.54900  236911.54747    0.00153    0.01500   0.00112
 1622:  64 26 38  0 63 26 37  0              237010.85500  237010.86180   -0.00680    0.01500   0.00108
 1623:  64 25 39  0 63 25 38  0              237121.77600  237121.77207    0.00393    0.01500   0.00103
 1624:  64 24 40  0 63 24 39  0              237246.39700  237246.38796    0.00904    0.01500   0.00099
 1625:  72  0 72  0 71  0 71  0              237280.08900  237280.09626   -0.00726    0.01500   0.00309
 1626:  71  1 70  0 70  1 69  0              237281.64600  237281.64900   -0.00300    0.01500   0.00240
 1627:  70  2 68  0 69  2 67  0              237290.09300  237290.09050    0.00250    0.01500   0.00191
 1628:  69  3 66  0 68  3 65  0              237313.54700  237313.54598    0.00102    0.01500   0.00159
 1629:  68  5 64  0 67  5 63  0              237365.02700  237365.02818   -0.00118    0.01500   0.00141  237365.03515   -0.00815 0.5000
 1630:  68  4 64  0 67  4 63  0              237365.02700  237365.04211   -0.01511    0.01500   0.00141  237365.03515   -0.00815 0.5000
 1631:  64 23 41  0 63 23 40  0              237387.33800  237387.33046    0.00754    0.01500   0.00095
 1632:  63 13 51  0 62 13 50  0              237444.12600  237444.13084   -0.00484    0.01500   0.00114
 1633:  61 10 51  0 60 10 50  0              237460.34100  237460.34660   -0.00560    0.01500   0.00161
 1634:  67  6 62  0 66  6 61  0              237466.40800  237466.40496    0.00304    0.01500   0.00132
 1635:  67  5 62  0 66  5 61  0              237466.80500  237466.80539   -0.00039    0.01500   0.00132
 1636:  64 22 42  0 63 22 41  0              237547.89000  237547.89634   -0.00634    0.01500   0.00091
 1637:  63 13 50  0 62 13 49  0              237610.10700  237610.09001    0.01699    0.01500   0.00118
 1638:  63 10 54  0 62 10 53  0              237632.34600  237632.34714   -0.00114    0.01500   0.00123
 1639:  66  7 60  0 65  7 59  0              237654.83400  237654.85530   -0.02130    0.01500   0.00128
 1640:  66  6 60  0 65  6 59  0              237663.06300  237663.07075   -0.00775    0.01500   0.00128
 1641:  64 21 43  0 63 21 42  0              237732.29700  237732.29207    0.00493    0.01500   0.00089
 1642:  64 20 44  0 63 20 43  0              237945.97700  237945.97596    0.00104    0.01500   0.00088
 1643:  65  8 58  0 64  8 57  0              237970.39700  237970.39596    0.00104    0.01500   0.00128
 1644:  65  7 58  0 64  7 57  0              238088.73500  238088.74287   -0.00787    0.01500   0.00129
 1645:  64 19 45  0 63 19 44  0              238196.18100  238196.17520    0.00580    0.01500   0.00088
 1646:  64  9 56  0 63  9 55  0              238261.70200  238261.70638   -0.00438    0.01500   0.00128
 1647:  63 12 52  0 62 12 51  0              238337.46700  238337.46393    0.00307    0.01500   0.00122
 1648:  62 11 51  0 61 11 50  0              238455.90500  238455.90380    0.00120    0.01500   0.00184
 1649:  64 18 46  0 63 18 45  0              238492.70400  238492.69969    0.00431    0.01500   0.00090
 1650:  63 11 53  0 62 11 52  0              238703.26900  238703.27976   -0.01076    0.01500   0.00123
 1651:  64 17 48  0 63 17 47  0              238849.28500  238849.27981    0.00519    0.01500   0.00093  238849.28741   -0.00241 0.5000
 1652:  64 17 47  0 63 17 46  0              238849.28500  238849.29501   -0.01001    0.01500   0.00093  238849.28741   -0.00241 0.5000
 1653:  64 16 49  0 63 16 48  0              239285.97700  239285.88300    0.09400    0.01500   0.00097  239285.99421   -0.01721 0.5000
 1654:  64 16 48  0 63 16 47  0              239285.97700  239286.10543   -0.12843    0.01500   0.00097  239285.99421   -0.01721 0.5000
 1655:  64 10 55  0 63 10 54  0              241134.30000  241134.31347   -0.01347    0.01500   0.00130
 1656:  65 23 42  0 64 23 41  0              241145.64200  241145.64183    0.00017    0.01500   0.00100
 1657:  66  8 59  0 65  8 58  0              241213.61900  241213.61757    0.00143    0.01500   0.00134
 1658:  66  7 59  0 65  7 58  0              241299.57900  241299.58732   -0.00832    0.01500   0.00135
 1659:  65 22 43  0 64 22 42  0              241314.02500  241314.01979    0.00521    0.01500   0.00097
 1660:  64 13 52  0 63 13 51  0              241404.04700  241404.05018   -0.00318    0.01500   0.00123
 1661:  65 21 44  0 64 21 43  0              241507.50300  241507.50115    0.00185    0.01500   0.00094
 1662:  65  9 57  0 64  9 56  0              241547.42800  241547.43530   -0.00730    0.01500   0.00134
 1663:  62 10 52  0 61 10 51  0              241599.03600  241599.06374   -0.02774    0.01500   0.00162
 1664:  64 13 51  0 63 13 50  0              241638.41300  241638.40520    0.00780    0.01500   0.00129
 1665:  65 20 45  0 64 20 44  0              241731.88500  241731.87235    0.01265    0.01500   0.00093
 1666:  65 19 46  0 64 19 45  0              241994.82000  241994.81659    0.00341    0.01500   0.00094
 1667:  64 12 53  0 63 12 52  0              242281.22800  242281.25229   -0.02429    0.01500   0.00130
 1668:  65 18 48  0 64 18 47  0              242306.80500  242306.80047    0.00453    0.01500   0.00096  242306.80124    0.00376 0.5000
 1669:  65 18 47  0 64 18 46  0              242306.80500  242306.80200    0.00300    0.01500   0.00096  242306.80124    0.00376 0.5000
 1670:  65  8 57  0 64  8 56  0              242398.53800  242398.54109   -0.00309    0.01500   0.00146
 1671:  63  9 54  0 62  9 53  0              242413.90500  242413.90642   -0.00142    0.01500   0.00152
 1672:  64 11 54  0 63 11 53  0              242481.55500  242481.56391   -0.00891    0.01500   0.00131
 1673:  65 17 49  0 64 17 48  0              242682.56500  242682.54964    0.01536    0.01500   0.00100  242682.56221    0.00279 0.5000
 1674:  65 17 48  0 64 17 47  0              242682.56500  242682.57479   -0.00979    0.01500   0.00100  242682.56221    0.00279 0.5000
 1675:  63 11 52  0 62 11 51  0              243006.16200  243006.15868    0.00332    0.01500   0.00201
 1676:  65 16 50  0 64 16 49  0              243143.57600  243143.58765   -0.01165    0.03000   0.00105
 1677:  65 16 49  0 64 16 48  0              243143.90500  243143.94215   -0.03715    0.01500   0.00105
 1678:  66 44 22  0 65 44 21  0              243445.75200  243445.75211   -0.00011    0.03000   0.00220
 1679:  66 43 23  0 65 43 22  0              243477.83600  243477.82696    0.00904    0.03000   0.00206
 1680:  66 42 24  0 65 42 23  0              243511.37200  243511.35190    0.02010    0.03000   0.00195
 1681:  66 41 25  0 65 41 24  0              243546.46100  243546.49297   -0.03197    0.03000   0.00186
 1682:  66 40 26  0 65 40 25  0              243583.43800  243583.43740    0.00060    0.03000   0.00180
 1683:  66 39 27  0 65 39 26  0              243622.38900  243622.39694   -0.00794    0.03000   0.00175
 1684:  66 38 28  0 65 38 27  0              243663.61200  243663.61191    0.00009    0.03000   0.00171
 1685:  64 12 52  0 63 12 51  0              243705.49900  243705.50613   -0.00713    0.01500   0.00169
 1686:  66 37 29  0 65 37 28  0              243707.35900  243707.35595    0.00305    0.03000   0.00168
 1687:  65 15 51  0 64 15 50  0              243722.15700  243722.14853    0.00847    0.01500   0.00112
 1688:  65 15 50  0 64 15 49  0              243726.39200  243726.37909    0.01291    0.01500   0.00112
 1689:  66 36 30  0 65 36 29  0              243753.90400  243753.94186   -0.03786    0.03000   0.00165
 1690:  66 35 31  0 65 35 30  0              243803.74200  243803.72853    0.01347    0.03000   0.00162
 1691:  74  0 74  0 73  0 73  0              243819.34300  243819.32610    0.01690    0.01500   0.00340
 1692:  73  1 72  0 72  1 71  0              243820.71400  243820.70907    0.00493    0.01500   0.00268
 1693:  72  2 70  0 71  2 69  0              243828.48900  243828.48929   -0.00029    0.01500   0.00215
 1694:  71  3 68  0 70  3 67  0              243850.15200  243850.15694   -0.00494    0.01500   0.00180
 1695:  66 34 32  0 65 34 31  0              243857.12800  243857.12955   -0.00155    0.03000   0.00158
 1696:  70  5 66  0 69  5 65  0              243897.51100  243897.51528   -0.00428    0.01500   0.00159  243897.51832   -0.00732 0.5000
 1697:  70  4 66  0 69  4 65  0              243897.51100  243897.52136   -0.01036    0.01500   0.00159  243897.51832   -0.00732 0.5000
 1698:  66 33 33  0 65 33 32  0              243914.64700  243914.62355    0.02345    0.03000   0.00154
 1699:  66 32 34  0 65 32 33  0              243976.74800  243976.76720   -0.01920    0.03000   0.00150
 1700:  69  6 64  0 68  6 63  0              243990.13600  243990.04466    0.09134    0.01500   0.00148  243990.13652   -0.00052 0.5000
 1701:  69  5 64  0 68  5 63  0              243990.13600  243990.22837   -0.09237    0.01500   0.00148  243990.13652   -0.00052 0.5000
 1702:  66 31 35  0 65 31 34  0              244044.23000  244044.21119    0.01881    0.03000   0.00146
 1703:  66 30 36  0 65 30 35  0              244117.73100  244117.72033    0.01067    0.03000   0.00141
 1704:  68  7 62  0 67  7 61  0              244161.01400  244161.00630    0.00770    0.01500   0.00143
 1705:  68  6 62  0 67  6 61  0              244165.03100  244165.00470    0.02630    0.01500   0.00143
 1706:  66 29 37  0 65 29 36  0              244198.19300  244198.19901   -0.00601    0.03000   0.00136
 1707:  65 10 56  0 64 10 55  0              244594.85600  244594.86273   -0.00673    0.03000   0.00138
 1708:  66 25 41  0 65 25 40  0              244614.87500  244614.89570   -0.02070    0.03000   0.00114
 1709:  66 24 42  0 65 24 41  0              244751.61100  244751.58694    0.02406    0.03000   0.00110
 1710:  66  9 58  0 65  9 57  0              244818.74400  244818.70403    0.03997    0.03000   0.00142
 1711:  66 23 43  0 65 23 42  0              244906.34200  244906.32975    0.01225    0.03000   0.00106
 1712:  66 22 44  0 65 22 43  0              245082.82400  245082.79976    0.02424    0.03000   0.00102
 1713:  66 21 45  0 65 21 44  0              245285.73000  245285.70306    0.02694    0.03000   0.00100
 1714:  64  9 55  0 63  9 54  0              245353.08100  245353.08875   -0.00775    0.03000   0.00163
 1715:  65 13 53  0 64 13 52  0              245370.23800  245370.23414    0.00386    0.03000   0.00133
 1716:  66  8 58  0 65  8 57  0              245469.52400  245469.53923   -0.01523    0.03000   0.00150
 1717:  66 20 46  0 65 20 45  0              245521.16100  245521.17340   -0.01240    0.03000   0.00100
 1718:  63 10 53  0 62 10 52  0              245585.32800  245585.32788    0.00012    0.01500   0.00163
 1719:  65 13 52  0 64 13 51  0              245697.74000  245697.72553    0.01447    0.03000   0.00142
 1720:  66 19 47  0 65 19 46  0              245797.38900  245797.37930    0.00970    0.03000   0.00101
 1721:  66 18 49  0 65 18 48  0              246125.50500  246125.49200    0.01300    0.03000   0.00103  246125.49330    0.01170 0.5000
 1722:  66 18 48  0 65 18 47  0              246125.50500  246125.49461    0.01039    0.03000   0.00103  246125.49330    0.01170 0.5000
 1723:  65 12 54  0 64 12 53  0              246212.44200  246212.44334   -0.00134    0.03000   0.00140
 1724:  65 11 55  0 64 11 54  0              246219.80900  246219.80882    0.00018    0.03000   0.00139
 1725:  66 17 50  0 65 17 49  0              246521.32900  246521.30919    0.01981    0.03000   0.00107  246521.32981   -0.00081 0.5000
 1726:  66 17 49  0 65 17 48  0              246521.32900  246521.35043   -0.02143    0.03000   0.00107  246521.32981   -0.00081 0.5000
 1727:  66 16 51  0 65 16 50  0              247008.06900  247008.04041    0.02859    0.03000   0.00113
 1728:  66 16 50  0 65 16 49  0              247008.62600  247008.60025    0.02575    0.03000   0.00114
 1729:  75  0 75  0 74  0 74  0              247088.74700  247088.74624    0.00076    0.01500   0.00358
 1730:  74  1 73  0 73  1 72  0              247090.05200  247090.04965    0.00235    0.01500   0.00284
 1731:  73  2 71  0 72  2 70  0              247097.53300  247097.52168    0.01132    0.01500   0.00229
 1732:  72  3 69  0 71  3 68  0              247118.35000  247118.36245   -0.01245    0.01500   0.00192
 1733:  71  5 67  0 70  5 66  0              247163.84500  247163.83110    0.01390    0.01500   0.00169  247163.83310    0.01190 0.5000
 1734:  71  4 67  0 70  4 66  0              247163.84500  247163.83511    0.00989    0.01500   0.00169  247163.83310    0.01190 0.5000
 1735:  70  6 65  0 69  6 64  0              247252.39800  247252.34360    0.05440    0.01500   0.00157  247252.40561   -0.00761 0.5000
 1736:  70  5 65  0 69  5 64  0              247252.39800  247252.46762   -0.06962    0.01500   0.00157  247252.40561   -0.00761 0.5000
 1737:  67 38 29  0 66 38 28  0              247371.30500  247371.29592    0.00908    0.03000   0.00184
 1738:  69  7 63  0 68  7 62  0              247415.29000  247415.26066    0.02934    0.03000   0.00151
 1739:  67 37 30  0 66 37 29  0              247416.79100  247416.82123   -0.03023    0.03000   0.00181
 1740:  69  6 63  0 68  6 62  0              247418.01200  247418.03665   -0.02465    0.03000   0.00151
 1741:  67 36 31  0 66 36 30  0              247465.33400  247465.32781    0.00619    0.03000   0.00177
 1742:  67 35 32  0 66 35 31  0              247517.19700  247517.19159    0.00541    0.03000   0.00173
 1743:  64 11 53  0 63 11 52  0              247555.04500  247555.03485    0.01015    0.03000   0.00216
 1744:  67 34 33  0 66 34 32  0              247572.86800  247572.84583    0.02217    0.03000   0.00169
 1745:  66 15 52  0 65 15 51  0              247620.29600  247620.29996   -0.00396    0.03000   0.00122
 1746:  66 15 51  0 65 15 50  0              247626.72700  247626.72373    0.00327    0.03000   0.00122
 1747:  67 33 34  0 66 33 33  0              247632.77500  247632.79210   -0.01710    0.03000   0.00165
 1748:  67 32 35  0 66 32 34  0              247697.62400  247697.61381    0.01019    0.03000   0.00160
 1749:  68  8 61  0 67  8 60  0              247698.91600  247698.91530    0.00070    0.03000   0.00149
 1750:  68  7 61  0 67  7 60  0              247743.60000  247743.60202   -0.00202    0.03000   0.00149
 1751:  67 31 36  0 66 31 35  0              247767.98900  247767.99313   -0.00413    0.03000   0.00155
 1752:  67 30 37  0 66 30 36  0              247844.70400  247844.73215   -0.02815    0.03000   0.00149
 1753:  67 29 38  0 66 29 37  0              247928.78900  247928.77966    0.00934    0.03000   0.00144
 1754:  66 10 57  0 65 10 56  0              248016.77300  248016.77490   -0.00190    0.03000   0.00146
 1755:  67 28 39  0 66 28 38  0              248021.25800  248021.26551   -0.00751    0.03000   0.00138
 1756:  65 12 53  0 64 12 52  0              248066.53900  248066.52930    0.00970    0.03000   0.00192
 1757:  67  9 59  0 66  9 58  0              248078.64400  248078.64059    0.00341    0.03000   0.00149
 1758:  67 27 40  0 66 27 39  0              248123.55800  248123.54488    0.01312    0.03000   0.00132
 1759:  65  9 56  0 64  9 55  0              248233.89900  248233.89842    0.00058    0.01500   0.00173
 1760:  67 26 41  0 66 26 40  0              248237.25900  248237.25643    0.00257    0.03000   0.00126
 1761:  67 25 42  0 66 25 41  0              248364.40400  248364.39935    0.00465    0.03000   0.00121
 1762:  66 14 53  0 65 14 52  0              248401.36200  248401.35063    0.01137    0.03000   0.00132
 1763:  66 14 52  0 65 14 51  0              248462.10400  248462.10285    0.00115    0.03000   0.00134
 1764:  67 24 43  0 66 24 42  0              248507.44000  248507.43740    0.00260    0.03000   0.00116
 1765:  67  8 59  0 66  8 58  0              248571.71800  248571.72571   -0.00771    0.03000   0.00156
 1766:  67 23 44  0 66 23 43  0              248669.46800  248669.44187    0.02613    0.03000   0.00112
 1767:  67 22 45  0 66 22 44  0              248854.30700  248854.29223    0.01477    0.03000   0.00109
 1768:  67 21 46  0 66 21 45  0              249066.97000  249066.96486    0.00514    0.03000   0.00107
 1769:  67 20 47  0 66 20 46  0              249313.97700  249313.96132    0.01568    0.03000   0.00107
 1770:  67 19 48  0 66 19 47  0              249603.97400  249603.96717    0.00683    0.03000   0.00108
 1771:  80 16 65  0 79 16 64  0              301971.36600  301971.35516    0.01084    0.06000   0.00397
 1772:  81 22 59  0 80 22 58  0              301975.32500  301975.28504    0.03996    0.06000   0.00358
 1773:  87 20 68  0 86 20 67  0              326063.44400  326063.29162    0.15238    0.06000   0.00611  326063.43193    0.01207 0.5000
 1774:  87 20 67  0 86 20 66  0              326063.44400  326063.57223   -0.12823    0.06000   0.00611  326063.43193    0.01207 0.5000
 1775:  88 32 56  0 87 32 55  0              326117.96500  326117.94091    0.02409    0.06000   0.00673
 1776:  85 15 70  0 84 15 69  0              326131.16800  326131.25834   -0.09034    0.06000   0.00797
 1777:  90 10 81  0 89 10 80  0              326172.25100  326172.25358   -0.00258    0.06000   0.00730
 1778:  90  9 81  0 89  9 80  0              326174.87100  326174.85713    0.01387    0.06000   0.00730
 1779:  88 31 57  0 87 31 56  0              326273.40900  326273.36215    0.04685    0.06000   0.00661
 1780:  88 30 58  0 87 30 57  0              326444.09500  326444.07831    0.01669    0.06000   0.00650
 1781:  86 14 73  0 85 14 72  0              326449.58900  326449.56502    0.02398    0.06000   0.00621
 1782:  89 11 79  0 88 11 78  0              326583.00700  326582.99474    0.01226    0.06000   0.00697
 1783:  89 10 79  0 88 10 78  0              326619.00000  326618.97954    0.02046    0.06000   0.00697
 1784:  88 29 59  0 87 29 58  0              326632.47800  326632.46571    0.01229    0.06000   0.00641
 1785:  87 19 69  0 86 19 68  0              326794.58100  326794.54447    0.03653    0.06000   0.00627
 1786:  87 19 68  0 86 19 67  0              326797.50000  326797.50341   -0.00341    0.06000   0.00628
 1787:  88 27 61  0 87 27 60  0              327074.41700  327074.39191    0.02509    0.06000   0.00629
 1788:  88 12 77  0 87 12 76  0              327157.90000  327157.89856    0.00144    0.06000   0.00670
 1789:  86 12 74  0 85 12 73  0              327236.73800  327236.73135    0.00665    0.06000   0.00662
 1790:  84 13 71  0 83 13 70  0              327302.10900  327302.10179    0.00721    0.06000   0.00595
 1791:  88 26 62  0 87 26 61  0              327335.80400  327335.79122    0.01278    0.06000   0.00626
 1792: 100  1100  0 99  1 99  0              328776.70100  328776.71476   -0.01376    0.06000   0.01420  328776.73487   -0.03387 0.2500
 1793: 100  0100  0 99  0 99  0              328776.70100  328776.71476   -0.01376    0.06000   0.01420  328776.73487   -0.03387 0.2500
 1794:  99  2 98  0 98  2 97  0              328776.70100  328776.75497   -0.05397    0.06000   0.01420  328776.73487   -0.03387 0.2500
 1795:  99  1 98  0 98  1 97  0              328776.70100  328776.75497   -0.05397    0.06000   0.01420  328776.73487   -0.03387 0.2500
 1796:  98  3 96  0 97  3 95  0              328779.46700  328779.48004   -0.01304    0.06000   0.01240  328779.48004   -0.01304 0.5000
 1797:  98  2 96  0 97  2 95  0              328779.46700  328779.48004   -0.01304    0.06000   0.01240  328779.48004   -0.01304 0.5000
 1798:  97  4 94  0 96  4 93  0              328788.11200  328788.13711   -0.02511    0.06000   0.01142  328788.13711   -0.02511 0.5000
 1799:  97  3 94  0 96  3 93  0              328788.11200  328788.13711   -0.02511    0.06000   0.01142  328788.13711   -0.02511 0.5000
 1800:  88 22 67  0 87 22 66  0              328800.93600  328800.94905   -0.01305    0.06000   0.00638  328800.95041   -0.01441 0.5000
 1801:  88 22 66  0 87 22 65  0              328800.93600  328800.95178   -0.01578    0.06000   0.00638  328800.95041   -0.01441 0.5000
 1802:  96  5 92  0 95  5 91  0              328807.14600  328807.17403   -0.02803    0.06000   0.01060  328807.17403   -0.02803 0.5000
 1803:  96  4 92  0 95  4 91  0              328807.14600  328807.17403   -0.02803    0.06000   0.01060  328807.17403   -0.02803 0.5000
 1804:  87 17 71  0 86 17 70  0              328815.42500  328815.37089    0.05411    0.06000   0.00673
 1805:  95  6 90  0 94  6 89  0              328842.76900  328842.80155   -0.03255    0.06000   0.00989  328842.80155   -0.03255 0.5000
 1806:  95  5 90  0 94  5 89  0              328842.76900  328842.80155   -0.03255    0.06000   0.00989  328842.80155   -0.03255 0.5000
 1807:  89 41 48  0 88 41 47  0              328879.63100  328879.62045    0.01055    0.06000   0.00876
 1808:  94  7 88  0 93  7 87  0              328903.90500  328903.91324   -0.00824    0.06000   0.00928  328903.91331   -0.00831 0.5000
 1809:  94  6 88  0 93  6 87  0              328903.90500  328903.91339   -0.00839    0.06000   0.00928  328903.91331   -0.00831 0.5000
 1810:  89 40 49  0 88 40 48  0              328961.17200  328961.14894    0.02306    0.06000   0.00856
 1811:  93  8 86  0 92  8 85  0              329003.66500  329003.67540   -0.01040    0.06000   0.00873  329003.67756   -0.01256 0.5000
 1812:  93  7 86  0 92  7 85  0              329003.66500  329003.67972   -0.01472    0.06000   0.00873  329003.67756   -0.01256 0.5000
 1813:  87 17 70  0 86 17 69  0              329016.48500  329016.55816   -0.07316    0.06000   0.00688
 1814:  89 39 50  0 88 39 49  0              329047.86900  329047.93539   -0.06639    0.06000   0.00836
 1815:  89 38 51  0 88 38 50  0              329140.58300  329140.58956   -0.00656    0.06000   0.00817
 1816:  92  9 84  0 91  9 83  0              329162.50000  329162.44743    0.05257    0.06000   0.00825  329162.49752    0.00248 0.5000
 1817:  92  8 84  0 91  8 83  0              329162.50000  329162.54761   -0.04761    0.06000   0.00825  329162.49752    0.00248 0.5000
 1818:  89 37 52  0 88 37 51  0              329239.85900  329239.80891    0.05009    0.06000   0.00799
 1819:  88 21 68  0 87 21 67  0              329327.46700  329327.38180    0.08520    0.06000   0.00648  329327.40003    0.06697 0.5000
 1820:  88 21 67  0 87 21 66  0              329327.46700  329327.41825    0.04875    0.06000   0.00648  329327.40003    0.06697 0.5000
 1821:  89 36 53  0 88 36 52  0              329346.39200  329346.39471   -0.00271    0.06000   0.00781
 1822:  91 10 82  0 90 10 81  0              329413.18900  329413.17671    0.01229    0.06000   0.00782
 1823:  91  9 82  0 90  9 81  0              329415.06500  329415.00714    0.05786    0.06000   0.00782
 1824:  89 35 54  0 88 35 53  0              329461.27100  329461.27174   -0.00074    0.06000   0.00764
 1825:  89 34 55  0 88 34 54  0              329585.48600  329585.51276   -0.02676    0.06000   0.00748
 1826:  89 33 56  0 88 33 55  0              329720.38000  329720.36897    0.01103    0.06000   0.00733
 1827:  90 11 80  0 89 11 79  0              329806.95300  329806.96695   -0.01395    0.06000   0.00746
 1828:  89 32 57  0 88 32 56  0              329867.32900  329867.30858    0.02042    0.06000   0.00720
 1829:  88 20 69  0 87 20 68  0              329956.26000  329956.04507    0.21493    0.06000   0.00661  329956.25920    0.00080 0.5000
 1830:  88 20 68  0 87 20 67  0              329956.26000  329956.47333   -0.21333    0.06000   0.00661  329956.25920    0.00080 0.5000
 1831:  87 12 75  0 86 12 74  0              330015.34800  330015.34085    0.00715    0.06000   0.00695
 1832:  89 31 58  0 88 31 57  0              330028.06700  330028.06581    0.00119    0.06000   0.00708
 1833:  87 16 72  0 86 16 71  0              330028.96000  330028.96618   -0.00618    0.06000   0.00693
 1834:  87 14 74  0 86 14 73  0              330047.69800  330047.71811   -0.02011    0.06000   0.00663
 1835:  89 30 59  0 88 30 58  0              330204.68900  330204.70434   -0.01534    0.06000   0.00698
 1836:  89 12 78  0 88 12 77  0              330374.35600  330374.36903   -0.01303    0.06000   0.00716
 1837:  89 29 60  0 88 29 59  0              330399.72800  330399.70020    0.02780    0.06000   0.00689
 1838:  89 28 61  0 88 28 60  0              330616.07100  330616.05196    0.01904    0.06000   0.00682
 1839:  89 11 78  0 88 11 77  0              330652.38600  330652.37361    0.01239    0.06000   0.00720
 1840:  85 13 72  0 84 13 71  0              330686.42600  330686.42713   -0.00113    0.06000   0.00625
 1841:  88 19 70  0 87 19 69  0              330721.55400  330721.54412    0.00988    0.06000   0.00679
 1842:  88 19 69  0 87 19 68  0              330725.91300  330725.92345   -0.01045    0.06000   0.00679
 1843:  87 15 73  0 86 15 72  0              330765.03100  330765.03947   -0.00847    0.06000   0.00687
 1844:  86 15 71  0 85 15 70  0              330777.34300  330777.37051   -0.02751    0.06000   0.00876
 1845:  14 13  2  1 15 14  1  0               739.0625500   739.0629670 -0.0004170 -0.0005000 0.0000576   739.0629670 -0.0004170 0.5000
 1846:  14 13  1  1 15 14  2  0               739.0625500   739.0629670 -0.0004170 -0.0005000 0.0000576   739.0629670 -0.0004170 0.5000
 1847:  26  9 17  1 27 10 18  0               739.2623100   739.2621889  0.0001211 -0.0005000 0.0000277   739.2621847  0.0001253 0.5000
 1848:  26  9 18  1 27 10 17  0               739.2623100   739.2621804  0.0001296 -0.0005000 0.0000277   739.2621847  0.0001253 0.5000
 1849:  25  9 17  1 26 10 16  0               739.3841200   739.3841171  0.0000029 -0.0005000 0.0000268   739.3841192  0.0000008 0.5000
 1850:  25  9 16  1 26 10 17  0               739.3841200   739.3841212 -0.0000012 -0.0005000 0.0000268   739.3841192  0.0000008 0.5000
 1851:  13 12  1  1 14 13  2  0               739.6045500   739.6050515 -0.0005015 -0.0005000 0.0000506   739.6050515 -0.0005015 0.5000
 1852:  13 12  2  1 14 13  1  0               739.6045500   739.6050515 -0.0005015 -0.0005000 0.0000506   739.6050515 -0.0005015 0.5000
 1853:  54 12 43  1 55 12 44  0               739.6469400   739.6466988  0.0002412 -0.0005000 0.0002514
 1854:  16 11  6  1 17 12  5  0               739.6527900   739.6523289  0.0004611 -0.0005000 0.0001094   739.6526978  0.0000922 0.3333
 1855:  16 11  5  1 17 12  6  0               739.6527900   739.6523289  0.0004611 -0.0005000 0.0001094   739.6526978  0.0000922 0.3333
 1856:  53 10 43  1 54 10 44  0               739.6527900   739.6534355 -0.0006455 -0.0005000 0.0001094   739.6526978  0.0000922 0.3333
 1857:  15 11  4  1 16 12  5  0               739.7765100   739.7761603  0.0003497 -0.0005000 0.0001520   739.7765312 -0.0000212 0.2500
 1858:  15 11  5  1 16 12  4  0               739.7765100   739.7761603  0.0003497 -0.0005000 0.0001520   739.7765312 -0.0000212 0.2500
 1859:  55 30 25  1 56 30 26  0               739.7765100   739.7769021 -0.0003921 -0.0005000 0.0001520   739.7765312 -0.0000212 0.2500
 1860:  55 30 26  1 56 30 27  0               739.7765100   739.7769021 -0.0003921 -0.0005000 0.0001520   739.7765312 -0.0000212 0.2500
 1861:  53  6 47  1 54  6 48  0               739.8903700   739.8898164  0.0005536 -0.0005000 0.0002167
 1862:  31  6 26  1 32  7 25  0               739.9001400   739.8998538  0.0002862 -0.0005000 0.0000240   739.8999439  0.0001961 0.2500
 1863:  14 11  4  1 15 12  3  0               739.9001400   739.8999720  0.0001680 -0.0005000 0.0000240   739.8999439  0.0001961 0.2500
 1864:  14 11  3  1 15 12  4  0               739.9001400   739.8999720  0.0001680 -0.0005000 0.0000240   739.8999439  0.0001961 0.2500
 1865:  28  7 21  1 29  8 22  0               739.9001400   739.8999779  0.0001621 -0.0005000 0.0000240   739.8999439  0.0001961 0.2500
 1866:  22  8 14  1 23  9 15  0               740.1759000   740.1754249  0.0004751 -0.0005000 0.0000225   740.1754178  0.0004822 0.5000
 1867:  22  8 15  1 23  9 14  0               740.1759000   740.1754107  0.0004893 -0.0005000 0.0000225   740.1754178  0.0004822 0.5000
 1868:  51 28 23  1 52 28 24  0               740.2618300   740.2614608  0.0003692 -0.0005000 0.0001564   740.2618419 -0.0000119 0.2500
 1869:  50 17 33  1 51 17 34  0               740.2618300   740.2622230 -0.0003930 -0.0005000 0.0001564   740.2618419 -0.0000119 0.2500
 1870:  50 17 34  1 51 17 35  0               740.2618300   740.2622230 -0.0003930 -0.0005000 0.0001564   740.2618419 -0.0000119 0.2500
 1871:  51 28 24  1 52 28 25  0               740.2618300   740.2614608  0.0003692 -0.0005000 0.0001564   740.2618419 -0.0000119 0.2500
 1872:  11 11  0  1 12 12  1  0               740.2708800   740.2712050 -0.0003250 -0.0005000 0.0000454   740.2712050 -0.0003250 0.5000
 1873:  11 11  1  1 12 12  0  0               740.2708800   740.2712050 -0.0003250 -0.0005000 0.0000454   740.2712050 -0.0003250 0.5000
 1874:  21  8 14  1 22  9 13  0               740.2972500   740.2976057 -0.0003557 -0.0005000 0.0000743   740.2975906 -0.0003406 0.2500
 1875:  50 20 30  1 51 20 31  0               740.2972500   740.2975722 -0.0003222 -0.0005000 0.0000743   740.2975906 -0.0003406 0.2500
 1876:  21  8 13  1 22  9 14  0               740.2972500   740.2976123 -0.0003623 -0.0005000 0.0000743   740.2975906 -0.0003406 0.2500
 1877:  50 20 31  1 51 20 32  0               740.2972500   740.2975722 -0.0003222 -0.0005000 0.0000743   740.2975906 -0.0003406 0.2500
 1878:  14 10  4  1 15 11  5  0               740.3192900   740.3191574  0.0001326 -0.0005000 0.0000343   740.3191574  0.0001326 0.5000
 1879:  14 10  5  1 15 11  4  0               740.3192900   740.3191574  0.0001326 -0.0005000 0.0000343   740.3191574  0.0001326 0.5000
 1880:  17  9  9  1 18 10  8  0               740.3674900   740.3679778 -0.0004878 -0.0005000 0.0000255
 1881:  20  8 13  1 21  9 12  0               740.4204100   740.4200991  0.0003109 -0.0005000 0.0000213   740.4201006  0.0003094 0.5000
 1882:  20  8 12  1 21  9 13  0               740.4204100   740.4201021  0.0003079 -0.0005000 0.0000213   740.4201006  0.0003094 0.5000
 1883:  13 10  3  1 14 11  4  0               740.4426600   740.4429035 -0.0002435 -0.0005000 0.0001021   740.4426937 -0.0000337 0.1667
 1884:  13 10  4  1 14 11  3  0               740.4426600   740.4429035 -0.0002435 -0.0005000 0.0001021   740.4426937 -0.0000337 0.1667
 1885:  54  1 54  1 55  1 55  0               740.4426600   740.4422506  0.0004094 -0.0005000 0.0001021   740.4426937 -0.0000337 0.1667
 1886:  48 12 36  1 49 12 37  0               740.4426600   740.4428266 -0.0001666 -0.0005000 0.0001021   740.4426937 -0.0000337 0.1667
 1887:  54  0 54  1 55  0 55  0               740.4426600   740.4422506  0.0004094 -0.0005000 0.0001021   740.4426937 -0.0000337 0.1667
 1888:  48 12 37  1 49 12 38  0               740.4426600   740.4430272 -0.0003672 -0.0005000 0.0001021   740.4426937 -0.0000337 0.1667
 1889:  49 22 27  1 50 22 28  0               740.4467500   740.4474514 -0.0007014 -0.0005000 0.0001490   740.4474514 -0.0007014 0.5000
 1890:  49 22 28  1 50 22 29  0               740.4467500   740.4474514 -0.0007014 -0.0005000 0.0001490   740.4474514 -0.0007014 0.5000
 1891:  49 23 27  1 50 23 28  0               740.4576000   740.4584542 -0.0008542 -0.0005000 0.0001216   740.4575718  0.0000282 0.2000
 1892:  52  2 50  1 53  2 51  0               740.4576000   740.4564621  0.0011379 -0.0005000 0.0001216   740.4575718  0.0000282 0.2000
 1893:  49 23 26  1 50 23 27  0               740.4576000   740.4584542 -0.0008542 -0.0005000 0.0001216   740.4575718  0.0000282 0.2000
 1894:  52  3 50  1 53  3 51  0               740.4576000   740.4564625  0.0011375 -0.0005000 0.0001216   740.4575718  0.0000282 0.2000
 1895:  49  5 44  1 50  5 45  0               740.4576000   740.4580262 -0.0004262 -0.0005000 0.0001216   740.4575718  0.0000282 0.2000
 1896:  12 10  2  1 13 11  3  0               740.5666000   740.5666267 -0.0000267 -0.0005000 0.0000533   740.5669273 -0.0003273 0.3333
 1897:  48  5 43  1 49  5 44  0               740.5666000   740.5675284 -0.0009284 -0.0005000 0.0000533   740.5669273 -0.0003273 0.3333
 1898:  12 10  3  1 13 11  2  0               740.5666000   740.5666267 -0.0000267 -0.0005000 0.0000533   740.5669273 -0.0003273 0.3333
 1899:  22  7 16  1 23  8 15  0               740.6020600   740.6026559 -0.0005959 -0.0005000 0.0000219
 1900:  15  9  7  1 16 10  6  0               740.6148000   740.6151865 -0.0003865 -0.0005000 0.0000272   740.6151865 -0.0003865 0.5000
 1901:  15  9  6  1 16 10  7  0               740.6148000   740.6151865 -0.0003865 -0.0005000 0.0000272   740.6151865 -0.0003865 0.5000
 1902:  46  6 40  1 47  6 41  0               740.6197600   740.6206339 -0.0008739 -0.0005000 0.0000988   740.6197706 -0.0000106 0.2500
 1903:  45  8 37  1 46  8 38  0               740.6197600   740.6200234 -0.0002634 -0.0005000 0.0000988   740.6197706 -0.0000106 0.2500
 1904:  48 26 22  1 49 26 23  0               740.6197600   740.6192126  0.0005474 -0.0005000 0.0000988   740.6197706 -0.0000106 0.2500
 1905:  48 26 23  1 49 26 24  0               740.6197600   740.6192126  0.0005474 -0.0005000 0.0000988   740.6197706 -0.0000106 0.2500
 1906:  48 29 20  1 49 29 21  0               740.6545900   740.6546177 -0.0000277 -0.0005000 0.0001881   740.6546177 -0.0000277 0.5000
 1907:  48 29 19  1 49 29 20  0               740.6545900   740.6546177 -0.0000277 -0.0005000 0.0001881   740.6546177 -0.0000277 0.5000
 1908:  48 30 18  1 49 30 19  0               740.6674000   740.6669622  0.0004378 -0.0005000 0.0001474   740.6671710  0.0002290 0.2500
 1909:  52  0 52  1 53  0 53  0               740.6674000   740.6673797  0.0000203 -0.0005000 0.0001474   740.6671710  0.0002290 0.2500
 1910:  48 30 19  1 49 30 20  0               740.6674000   740.6669622  0.0004378 -0.0005000 0.0001474   740.6671710  0.0002290 0.2500
 1911:  52  1 52  1 53  1 53  0               740.6674000   740.6673797  0.0000203 -0.0005000 0.0001474   740.6671710  0.0002290 0.2500
 1912:  11 10  2  1 12 11  1  0               740.6907500   740.6903172  0.0004328 -0.0005000 0.0000662   740.6908949 -0.0001449 0.2500
 1913:  47 21 26  1 48 21 27  0               740.6907500   740.6914726 -0.0007226 -0.0005000 0.0000662   740.6908949 -0.0001449 0.2500
 1914:  11 10  1  1 12 11  2  0               740.6907500   740.6903172  0.0004328 -0.0005000 0.0000662   740.6908949 -0.0001449 0.2500
 1915:  47 21 27  1 48 21 28  0               740.6907500   740.6914726 -0.0007226 -0.0005000 0.0000662   740.6908949 -0.0001449 0.2500
 1916:  21  7 14  1 22  8 15  0               740.7236000   740.7237228 -0.0001228 -0.0005000 0.0000208   740.7236238 -0.0000238 0.5000
 1917:  21  7 15  1 22  8 14  0               740.7236000   740.7235248  0.0000752 -0.0005000 0.0000208   740.7236238 -0.0000238 0.5000
 1918:  45  9 36  1 46  9 37  0               740.7262000   740.7266813 -0.0004813 -0.0005000 0.0001196
 1919:  14  9  5  1 15 10  6  0               740.7392700   740.7388489  0.0004211 -0.0005000 0.0000476   740.7387007  0.0005693 0.2500
 1920:  46 14 32  1 47 14 33  0               740.7392700   740.7385523  0.0007177 -0.0005000 0.0000476   740.7387007  0.0005693 0.2500
 1921:  14  9  6  1 15 10  5  0               740.7392700   740.7388489  0.0004211 -0.0005000 0.0000476   740.7387007  0.0005693 0.2500
 1922:  46 14 33  1 47 14 34  0               740.7392700   740.7385526  0.0007174 -0.0005000 0.0000476   740.7387007  0.0005693 0.2500
 1923:  10 10  1  1 11 11  0  0               740.8139900   740.8139664  0.0000236 -0.0005000 0.0000393   740.8139664  0.0000236 0.5000
 1924:  10 10  0  1 11 11  1  0               740.8139900   740.8139664  0.0000236 -0.0005000 0.0000393   740.8139664  0.0000236 0.5000
 1925:  45  7 39  1 46  7 40  0               740.8176000   740.8173634  0.0002366 -0.0005000 0.0000931
 1926:  46 24 22  1 47 24 23  0               740.8507900   740.8507995 -0.0000095 -0.0005000 0.0001287   740.8507995 -0.0000095 0.5000
 1927:  46 24 23  1 47 24 24  0               740.8507900   740.8507995 -0.0000095 -0.0005000 0.0001287   740.8507995 -0.0000095 0.5000
 1928:  46 25 22  1 47 25 23  0               740.8625900   740.8617806  0.0008094 -0.0005000 0.0000672   740.8621534  0.0004366 0.2500
 1929:  13  9  4  1 14 10  5  0               740.8625900   740.8625261  0.0000639 -0.0005000 0.0000672   740.8621534  0.0004366 0.2500
 1930:  13  9  5  1 14 10  4  0               740.8625900   740.8625261  0.0000639 -0.0005000 0.0000672   740.8621534  0.0004366 0.2500
 1931:  46 25 21  1 47 25 22  0               740.8625900   740.8617806  0.0008094 -0.0005000 0.0000672   740.8621534  0.0004366 0.2500
 1932:  45 16 29  1 46 16 30  0               740.8921100   740.8926083 -0.0004983 -0.0005000 0.0000787   740.8923370 -0.0002270 0.2000
 1933:  50  0 50  1 51  0 51  0               740.8921100   740.8922597 -0.0001497 -0.0005000 0.0000787   740.8923370 -0.0002270 0.2000
 1934:  45  5 40  1 46  5 41  0               740.8921100   740.8919491  0.0001609 -0.0005000 0.0000787   740.8923370 -0.0002270 0.2000
 1935:  50  1 50  1 51  1 51  0               740.8921100   740.8922597 -0.0001497 -0.0005000 0.0000787   740.8923370 -0.0002270 0.2000
 1936:  45 16 30  1 46 16 31  0               740.8921100   740.8926083 -0.0004983 -0.0005000 0.0000787   740.8923370 -0.0002270 0.2000
 1937:  48  3 46  1 49  3 47  0               740.9048800   740.9052900 -0.0004100 -0.0005000 0.0001344   740.9052890 -0.0004090 0.5000
 1938:  48  2 46  1 49  2 47  0               740.9048800   740.9052880 -0.0004080 -0.0005000 0.0001344   740.9052890 -0.0004090 0.5000
 1939:  46 30 16  1 47 30 17  0               740.9206100   740.9203855  0.0002245 -0.0005000 0.0001242   740.9201856  0.0004244 0.3333
 1940:  46 30 17  1 47 30 18  0               740.9206100   740.9203855  0.0002245 -0.0005000 0.0001242   740.9201856  0.0004244 0.3333
 1941:  44 10 34  1 45 10 35  0               740.9206100   740.9197858  0.0008242 -0.0005000 0.0001242   740.9201856  0.0004244 0.3333
 1942:  44  7 38  1 45  7 39  0               740.9356500   740.9354017  0.0002483 -0.0005000 0.0000763   740.9355136  0.0001364 0.3333
 1943:  45 20 25  1 46 20 26  0               740.9356500   740.9355696  0.0000804 -0.0005000 0.0000763   740.9355136  0.0001364 0.3333
 1944:  45 20 26  1 46 20 27  0               740.9356500   740.9355696  0.0000804 -0.0005000 0.0000763   740.9355136  0.0001364 0.3333
 1945:  45 21 25  1 46 21 26  0               740.9451600   740.9459581 -0.0007981 -0.0005000 0.0001095   740.9459581 -0.0007981 0.5000
 1946:  45 21 24  1 46 21 25  0               740.9451600   740.9459581 -0.0007981 -0.0005000 0.0001095   740.9459581 -0.0007981 0.5000
 1947:  44 12 33  1 45 12 34  0               740.9666300   740.9668761 -0.0002461 -0.0005000 0.0000536   740.9668354 -0.0002054 0.1667
 1948:  44 12 32  1 45 12 33  0               740.9666300   740.9668462 -0.0002162 -0.0005000 0.0000536   740.9668354 -0.0002054 0.1667
 1949:  45 23 23  1 46 23 24  0               740.9666300   740.9669506 -0.0003206 -0.0005000 0.0000536   740.9668354 -0.0002054 0.1667
 1950:  19  7 12  1 20  8 13  0               740.9666300   740.9667187 -0.0000887 -0.0005000 0.0000536   740.9668354 -0.0002054 0.1667
 1951:  45 23 22  1 46 23 23  0               740.9666300   740.9669506 -0.0003206 -0.0005000 0.0000536   740.9668354 -0.0002054 0.1667
 1952:  19  7 13  1 20  8 12  0               740.9666300   740.9666706 -0.0000406 -0.0005000 0.0000536   740.9668354 -0.0002054 0.1667
 1953:  12  9  4  1 13 10  3  0               740.9858500   740.9862024 -0.0003524 -0.0005000 0.0000305   740.9862024 -0.0003524 0.5000
 1954:  12  9  3  1 13 10  4  0               740.9858500   740.9862024 -0.0003524 -0.0005000 0.0000305   740.9862024 -0.0003524 0.5000
 1955:  44 14 30  1 45 14 31  0               740.9969700   740.9967656  0.0002044 -0.0005000 0.0000715   740.9967656  0.0002044 0.5000
 1956:  44 14 31  1 45 14 32  0               740.9969700   740.9967657  0.0002043 -0.0005000 0.0000715   740.9967656  0.0002044 0.5000
 1957:  45 26 19  1 46 26 20  0               741.0003000   740.9997022  0.0005978 -0.0005000 0.0001273   740.9997022  0.0005978 0.5000
 1958:  45 26 20  1 46 26 21  0               741.0003000   740.9997022  0.0005978 -0.0005000 0.0001273   740.9997022  0.0005978 0.5000
 1959:  49  1 49  1 50  1 50  0               741.0046900   741.0046062  0.0000838 -0.0005000 0.0001608   741.0046062  0.0000838 0.5000
 1960:  49  0 49  1 50  0 50  0               741.0046900   741.0046062  0.0000838 -0.0005000 0.0001608   741.0046062  0.0000838 0.5000
 1961:  48  2 47  1 49  2 48  0               741.0115000   741.0114192  0.0000808 -0.0005000 0.0000835   741.0112539  0.0002461 0.2500
 1962:  45 27 19  1 46 27 20  0               741.0115000   741.0110886  0.0004114 -0.0005000 0.0000835   741.0112539  0.0002461 0.2500
 1963:  45 27 18  1 46 27 19  0               741.0115000   741.0110886  0.0004114 -0.0005000 0.0000835   741.0112539  0.0002461 0.2500
 1964:  48  1 47  1 49  1 48  0               741.0115000   741.0114192  0.0000808 -0.0005000 0.0000835   741.0112539  0.0002461 0.2500
 1965:  15  8  7  1 16  9  8  0               741.0357500   741.0356497  0.0001003 -0.0005000 0.0000225   741.0356497  0.0001003 0.5000
 1966:  15  8  8  1 16  9  7  0               741.0357500   741.0356497  0.0001003 -0.0005000 0.0000225   741.0356497  0.0001003 0.5000
 1967:  18  7 11  1 19  8 12  0               741.0889500   741.0888586  0.0000914 -0.0005000 0.0000188   741.0888475  0.0001025 0.5000
 1968:  18  7 12  1 19  8 11  0               741.0889500   741.0888364  0.0001136 -0.0005000 0.0000188   741.0888475  0.0001025 0.5000
 1969:  11  9  2  1 12 10  3  0               741.1097200   741.1098635 -0.0001435 -0.0005000 0.0000317   741.1098635 -0.0001435 0.5000
 1970:  11  9  3  1 12 10  2  0               741.1097200   741.1098635 -0.0001435 -0.0005000 0.0000317   741.1098635 -0.0001435 0.5000
 1971:  44 25 20  1 45 25 21  0               741.1151100   741.1152495 -0.0001395 -0.0005000 0.0001145   741.1152495 -0.0001395 0.5000
 1972:  44 25 19  1 45 25 20  0               741.1151100   741.1152495 -0.0001395 -0.0005000 0.0001145   741.1152495 -0.0001395 0.5000
 1973:  43 14 29  1 44 14 30  0               741.1259200   741.1255379  0.0003821 -0.0005000 0.0000787   741.1259313 -0.0000113 0.2500
 1974:  43 14 30  1 44 14 31  0               741.1259200   741.1255379  0.0003821 -0.0005000 0.0000787   741.1259313 -0.0000113 0.2500
 1975:  44 26 19  1 45 26 20  0               741.1259200   741.1263247 -0.0004047 -0.0005000 0.0000787   741.1259313 -0.0000113 0.2500
 1976:  44 26 18  1 45 26 19  0               741.1259200   741.1263247 -0.0004047 -0.0005000 0.0000787   741.1259313 -0.0000113 0.2500
 1977:  46  2 44  1 47  2 45  0               741.1289800   741.1292860 -0.0003060 -0.0005000 0.0001095   741.1292884 -0.0003084 0.5000
 1978:  46  3 44  1 47  3 45  0               741.1289800   741.1292907 -0.0003107 -0.0005000 0.0001095   741.1292884 -0.0003084 0.5000
 1979:  47  1 47  1 48  1 48  0               741.2290200   741.2291117 -0.0000917 -0.0005000 0.0001287   741.2291117 -0.0000917 0.5000
 1980:  47  0 47  1 48  0 48  0               741.2290200   741.2291117 -0.0000917 -0.0005000 0.0001287   741.2291117 -0.0000917 0.5000
 1981:  42 13 29  1 43 13 30  0               741.2411400   741.2413893 -0.0002493 -0.0005000 0.0000553   741.2414073 -0.0002673 0.1429
 1982:  43 25 18  1 44 25 19  0               741.2411400   741.2418257 -0.0006857 -0.0005000 0.0000553   741.2414073 -0.0002673 0.1429
 1983:  43 25 19  1 44 25 20  0               741.2411400   741.2418257 -0.0006857 -0.0005000 0.0000553   741.2414073 -0.0002673 0.1429
 1984:  45  3 43  1 46  3 44  0               741.2411400   741.2411867 -0.0000467 -0.0005000 0.0000553   741.2414073 -0.0002673 0.1429
 1985:  42 13 30  1 43 13 31  0               741.2411400   741.2413899 -0.0002499 -0.0005000 0.0000553   741.2414073 -0.0002673 0.1429
 1986:  45  2 43  1 46  2 44  0               741.2411400   741.2411796 -0.0000396 -0.0005000 0.0000553   741.2414073 -0.0002673 0.1429
 1987:  43  4 39  1 44  4 40  0               741.2411400   741.2410542  0.0000858 -0.0005000 0.0000553   741.2414073 -0.0002673 0.1429
 1988:  43  5 39  1 44  5 40  0               741.2448700   741.2453819 -0.0005119 -0.0005000 0.0000971   741.2448565  0.0000135 0.3333
 1989:  44  3 41  1 45  3 42  0               741.2448700   741.2444789  0.0003911 -0.0005000 0.0000971   741.2448565  0.0000135 0.3333
 1990:  44  4 41  1 45  4 42  0               741.2448700   741.2447089  0.0001611 -0.0005000 0.0000971   741.2448565  0.0000135 0.3333
 1991:  43 30 14  1 44 30 15  0               741.2999000   741.2998083  0.0000917 -0.0005000 0.0001762   741.2998083  0.0000917 0.5000
 1992:  43 30 13  1 44 30 14  0               741.2999000   741.2998083  0.0000917 -0.0005000 0.0001762   741.2998083  0.0000917 0.5000
 1993:  41  5 36  1 42  5 37  0               741.3109600   741.3113125 -0.0003525 -0.0005000 0.0000643
 1994:  41 10 32  1 42 10 33  0               741.3201100   741.3202453 -0.0001353 -0.0005000 0.0000550
 1995:  16  7  9  1 17  8 10  0               741.3338600   741.3340882 -0.0002282 -0.0005000 0.0000188   741.3340861 -0.0002261 0.5000
 1996:  16  7 10  1 17  8  9  0               741.3338600   741.3340841 -0.0002241 -0.0005000 0.0000188   741.3340861 -0.0002261 0.5000
 1997:  46  1 46  1 47  1 47  0               741.3414500   741.3412706  0.0001794 -0.0005000 0.0001161   741.3412706  0.0001794 0.5000
 1998:  46  0 46  1 47  0 47  0               741.3414500   741.3412706  0.0001794 -0.0005000 0.0001161   741.3412706  0.0001794 0.5000
 1999:  44  3 42  1 45  3 43  0               741.3524800   741.3530127 -0.0005327 -0.0005000 0.0000903   741.3530073 -0.0005273 0.5000
 2000:  44  2 42  1 45  2 43  0               741.3524800   741.3530018 -0.0005218 -0.0005000 0.0000903   741.3530073 -0.0005273 0.5000
 2001:  41 12 30  1 42 12 31  0               741.3566800   741.3564940  0.0001860 -0.0005000 0.0000429   741.3566008  0.0000792 0.1429
 2002:  41 12 29  1 42 12 30  0               741.3566800   741.3564877  0.0001923 -0.0005000 0.0000429   741.3566008  0.0000792 0.1429
 2003:  43  4 40  1 44  4 41  0               741.3566800   741.3562471  0.0004329 -0.0005000 0.0000429   741.3566008  0.0000792 0.1429
 2004:  43  3 40  1 44  3 41  0               741.3566800   741.3559111  0.0007689 -0.0005000 0.0000429   741.3566008  0.0000792 0.1429
 2005:   9  9  0  1 10 10  1  0               741.3566800   741.3570923 -0.0004123 -0.0005000 0.0000429   741.3566008  0.0000792 0.1429
 2006:   9  9  1  1 10 10  0  0               741.3566800   741.3570923 -0.0004123 -0.0005000 0.0000429   741.3566008  0.0000792 0.1429
 2007:  42  5 38  1 43  5 39  0               741.3566800   741.3568813 -0.0002013 -0.0005000 0.0000429   741.3566008  0.0000792 0.1429
 2008:  41  6 36  1 42  6 37  0               741.3658600   741.3656703  0.0001897 -0.0005000 0.0000599
 2009:  41 13 28  1 42 13 29  0               741.3710200   741.3702662  0.0007538 -0.0005000 0.0000541   741.3702664  0.0007536 0.5000
 2010:  41 13 29  1 42 13 30  0               741.3710200   741.3702666  0.0007534 -0.0005000 0.0000541   741.3702664  0.0007536 0.5000
 2011:  39  6 33  1 40  6 34  0               741.3838600   741.3843584 -0.0004984 -0.0005000 0.0000958
 2012:  42 28 14  1 43 28 15  0               741.4017900   741.4020562 -0.0002662 -0.0005000 0.0001283   741.4020562 -0.0002662 0.5000
 2013:  42 28 15  1 43 28 16  0               741.4017900   741.4020562 -0.0002662 -0.0005000 0.0001283   741.4020562 -0.0002662 0.5000
 2014:  42 29 13  1 43 29 14  0               741.4145600   741.4139136  0.0006464 -0.0005000 0.0000676   741.4140520  0.0005080 0.2000
 2015:  42 29 14  1 43 29 15  0               741.4145600   741.4139136  0.0006464 -0.0005000 0.0000676   741.4140520  0.0005080 0.2000
 2016:  40  5 35  1 41  5 36  0               741.4145600   741.4141083  0.0004517 -0.0005000 0.0000676   741.4140520  0.0005080 0.2000
 2017:  41 17 25  1 42 17 26  0               741.4145600   741.4141623  0.0003977 -0.0005000 0.0000676   741.4140520  0.0005080 0.2000
 2018:  41 17 24  1 42 17 25  0               741.4145600   741.4141623  0.0003977 -0.0005000 0.0000676   741.4140520  0.0005080 0.2000
 2019:  40  9 31  1 41  9 32  0               741.4215100   741.4212688  0.0002412 -0.0005000 0.0000553
 2020:  41 21 20  1 42 21 21  0               741.4530700   741.4534421 -0.0003721 -0.0005000 0.0000668   741.4534046 -0.0003346 0.2500
 2021:  45  0 45  1 46  0 46  0               741.4530700   741.4533670 -0.0002970 -0.0005000 0.0000668   741.4534046 -0.0003346 0.2500
 2022:  45  1 45  1 46  1 46  0               741.4530700   741.4533670 -0.0002970 -0.0005000 0.0000668   741.4534046 -0.0003346 0.2500
 2023:  41 21 21  1 42 21 22  0               741.4530700   741.4534421 -0.0003721 -0.0005000 0.0000668   741.4534046 -0.0003346 0.2500
 2024:  44  1 43  1 45  1 44  0               741.4595800   741.4596193 -0.0000393 -0.0005000 0.0000612   741.4598229 -0.0002429 0.3333
 2025:  41  4 37  1 42  4 38  0               741.4595800   741.4602297 -0.0006497 -0.0005000 0.0000612   741.4598229 -0.0002429 0.3333
 2026:  44  2 43  1 45  2 44  0               741.4595800   741.4596196 -0.0000396 -0.0005000 0.0000612   741.4598229 -0.0002429 0.3333
 2027:  42 33  9  1 43 33 10  0               741.4646500   741.4646865 -0.0000365 -0.0005000 0.0001589   741.4647233 -0.0000733 0.2500
 2028:  43  2 41  1 44  2 42  0               741.4646500   741.4647519 -0.0001019 -0.0005000 0.0001589   741.4647233 -0.0000733 0.2500
 2029:  42 33 10  1 43 33 11  0               741.4646500   741.4646865 -0.0000365 -0.0005000 0.0001589   741.4647233 -0.0000733 0.2500
 2030:  43  3 41  1 44  3 42  0               741.4646500   741.4647684 -0.0001184 -0.0005000 0.0001589   741.4647233 -0.0000733 0.2500
 2031:  11  8  4  1 12  9  3  0               741.5298100   741.5298702 -0.0000602 -0.0005000 0.0000265   741.5298702 -0.0000602 0.5000
 2032:  11  8  3  1 12  9  4  0               741.5298100   741.5298702 -0.0000602 -0.0005000 0.0000265   741.5298702 -0.0000602 0.5000
 2033:  22  5 17  1 23  6 18  0               741.5354200   741.5360593 -0.0006393 -0.0005000 0.0000281
 2034:  38  7 31  1 39  7 32  0               741.5524900   741.5524898  0.0000002 -0.0005000 0.0001222   741.5523568  0.0001332 0.3333
 2035:  41 30 12  1 42 30 13  0               741.5524900   741.5522903  0.0001997 -0.0005000 0.0001222   741.5523568  0.0001332 0.3333
 2036:  41 30 11  1 42 30 12  0               741.5524900   741.5522903  0.0001997 -0.0005000 0.0001222   741.5523568  0.0001332 0.3333
 2037:  41 31 11  1 42 31 12  0               741.5652800   741.5647910  0.0004890 -0.0005000 0.0001166   741.5650959  0.0001841 0.2500
 2038:  44  0 44  1 45  0 45  0               741.5652800   741.5654007 -0.0001207 -0.0005000 0.0001166   741.5650959  0.0001841 0.2500
 2039:  41 31 10  1 42 31 11  0               741.5652800   741.5647910  0.0004890 -0.0005000 0.0001166   741.5650959  0.0001841 0.2500
 2040:  44  1 44  1 45  1 45  0               741.5652800   741.5654007 -0.0001207 -0.0005000 0.0001166   741.5650959  0.0001841 0.2500
 2041:  21  5 17  1 22  6 16  0               741.5764900   741.5757054  0.0007846 -0.0005000 0.0000513   741.5761958  0.0002942 0.3333
 2042:  42  3 40  1 43  3 41  0               741.5764900   741.5764534  0.0000366 -0.0005000 0.0000513   741.5761958  0.0002942 0.3333
 2043:  42  2 40  1 43  2 41  0               741.5764900   741.5764285  0.0000615 -0.0005000 0.0000513   741.5761958  0.0002942 0.3333
 2044:  40  5 36  1 41  5 37  0               741.5802400   741.5802183  0.0000217 -0.0005000 0.0000373   741.5801400  0.0001000 0.2000
 2045:  40 21 19  1 41 21 20  0               741.5802400   741.5800124  0.0002276 -0.0005000 0.0000373   741.5801400  0.0001000 0.2000
 2046:  40 21 20  1 41 21 21  0               741.5802400   741.5800124  0.0002276 -0.0005000 0.0000373   741.5801400  0.0001000 0.2000
 2047:  14  7  7  1 15  8  8  0               741.5802400   741.5802287  0.0000113 -0.0005000 0.0000373   741.5801400  0.0001000 0.2000
 2048:  14  7  8  1 15  8  7  0               741.5802400   741.5802281  0.0000119 -0.0005000 0.0000373   741.5801400  0.0001000 0.2000
 2049:  17  6 12  1 18  7 11  0               741.6357200   741.6361000 -0.0003800 -0.0005000 0.0000177
 2050:  17  6 11  1 18  7 12  0               741.6370200   741.6364317  0.0005883 -0.0005000 0.0000432   741.6370773 -0.0000573 0.5000
 2051:  37  6 31  1 38  6 32  0               741.6370200   741.6377229 -0.0007029 -0.0005000 0.0000432   741.6370773 -0.0000573 0.5000
 2052:  38  8 30  1 39  8 31  0               741.6448300   741.6441677  0.0006623 -0.0005000 0.0000534
 2053:  10  8  2  1 11  9  3  0               741.6534600   741.6534656 -0.0000056 -0.0005000 0.0000276   741.6534656 -0.0000056 0.5000
 2054:  10  8  3  1 11  9  2  0               741.6534600   741.6534656 -0.0000056 -0.0005000 0.0000276   741.6534656 -0.0000056 0.5000
 2055:  39 18 22  1 40 18 23  0               741.6771400   741.6778732 -0.0007332 -0.0005000 0.0000444   741.6775070 -0.0003670 0.2000
 2056:  39 18 21  1 40 18 22  0               741.6771400   741.6778732 -0.0007332 -0.0005000 0.0000444   741.6775070 -0.0003670 0.2000
 2057:  43  1 43  1 44  1 44  0               741.6771400   741.6773717 -0.0002317 -0.0005000 0.0000444   741.6775070 -0.0003670 0.2000
 2058:  43  0 43  1 44  0 44  0               741.6771400   741.6773717 -0.0002317 -0.0005000 0.0000444   741.6775070 -0.0003670 0.2000
 2059:  39  4 35  1 40  4 36  0               741.6771400   741.6770450  0.0000950 -0.0005000 0.0000444   741.6775070 -0.0003670 0.2000
 2060:  42  1 41  1 43  1 42  0               741.6833200   741.6833290 -0.0000090 -0.0005000 0.0000607   741.6833294 -0.0000094 0.5000
 2061:  42  2 41  1 43  2 42  0               741.6833200   741.6833298 -0.0000098 -0.0005000 0.0000607   741.6833294 -0.0000094 0.5000
 2062:  39 19 20  1 40 19 21  0               741.6878700   741.6873209  0.0005491 -0.0005000 0.0000513   741.6876849  0.0001851 0.2500
 2063:  41  2 39  1 42  2 40  0               741.6878700   741.6880302 -0.0001602 -0.0005000 0.0000513   741.6876849  0.0001851 0.2500
 2064:  41  3 39  1 42  3 40  0               741.6878700   741.6880677 -0.0001977 -0.0005000 0.0000513   741.6876849  0.0001851 0.2500
 2065:  39 19 21  1 40 19 22  0               741.6878700   741.6873209  0.0005491 -0.0005000 0.0000513   741.6876849  0.0001851 0.2500
 2066:  38  9 29  1 39  9 30  0               741.6895900   741.6892514  0.0003386 -0.0005000 0.0000496   741.6897174 -0.0001274 0.3333
 2067:  40  3 37  1 41  3 38  0               741.6895900   741.6894400  0.0001500 -0.0005000 0.0000496   741.6897174 -0.0001274 0.3333
 2068:  40  4 37  1 41  4 38  0               741.6895900   741.6904608 -0.0008708 -0.0005000 0.0000496   741.6897174 -0.0001274 0.3333
 2069:  39 20 20  1 40 20 21  0               741.6961500   741.6968304 -0.0006804 -0.0005000 0.0000790   741.6968304 -0.0006804 0.5000
 2070:  39 20 19  1 40 20 20  0               741.6961500   741.6968304 -0.0006804 -0.0005000 0.0000790   741.6968304 -0.0006804 0.5000
 2071:  13  7  6  1 14  8  7  0               741.7032600   741.7035283 -0.0002683 -0.0005000 0.0001342   741.7036230 -0.0003630 0.2500
 2072:  13  7  7  1 14  8  6  0               741.7032600   741.7035281 -0.0002681 -0.0005000 0.0001342   741.7036230 -0.0003630 0.2500
 2073:  40 32  8  1 41 32  9  0               741.7032600   741.7037179 -0.0004579 -0.0005000 0.0001342   741.7036230 -0.0003630 0.2500
 2074:  40 32  9  1 41 32 10  0               741.7032600   741.7037179 -0.0004579 -0.0005000 0.0001342   741.7036230 -0.0003630 0.2500
 2075:  38  6 33  1 39  6 34  0               741.7148600   741.7144464  0.0004136 -0.0005000 0.0000459
 2076:  37  5 32  1 38  5 33  0               741.7252600   741.7256054 -0.0003454 -0.0005000 0.0000614
 2077:  39 25 15  1 40 25 16  0               741.7468800   741.7470991 -0.0002191 -0.0005000 0.0000908   741.7470991 -0.0002191 0.5000
 2078:  39 25 14  1 40 25 15  0               741.7468800   741.7470991 -0.0002191 -0.0005000 0.0000908   741.7470991 -0.0002191 0.5000
 2079:  42  0 42  1 43  0 43  0               741.7892500   741.7892800 -0.0000300 -0.0005000 0.0000860   741.7892800 -0.0000300 0.2500
 2080:  42  0 42  1 43  1 43  0               741.7892500   741.7892800 -0.0000300 -0.0005000 0.0000860   741.7892800 -0.0000300 0.2500
 2081:  42  1 42  1 43  0 43  0               741.7892500   741.7892800 -0.0000300 -0.0005000 0.0000860   741.7892800 -0.0000300 0.2500
 2082:  42  1 42  1 43  1 43  0               741.7892500   741.7892800 -0.0000300 -0.0005000 0.0000860   741.7892800 -0.0000300 0.2500
 2083:  40  3 38  1 41  3 39  0               741.7997200   741.7996111  0.0001089 -0.0005000 0.0000640   741.7998207 -0.0001007 0.3333
 2084:  39  3 36  1 40  3 37  0               741.7997200   741.8002962 -0.0005762 -0.0005000 0.0000640   741.7998207 -0.0001007 0.3333
 2085:  40  2 38  1 41  2 39  0               741.7997200   741.7995548  0.0001652 -0.0005000 0.0000640   741.7998207 -0.0001007 0.3333
 2086:  38 21 17  1 39 21 18  0               741.8328300   741.8328025  0.0000275 -0.0005000 0.0000425   741.8329636 -0.0001336 0.2500
 2087:  37  6 32  1 38  6 33  0               741.8328300   741.8328831 -0.0000531 -0.0005000 0.0000425   741.8329636 -0.0001336 0.2500
 2088:  38 21 18  1 39 21 19  0               741.8328300   741.8328025  0.0000275 -0.0005000 0.0000425   741.8329636 -0.0001336 0.2500
 2089:  36  5 31  1 37  5 32  0               741.8328300   741.8333663 -0.0005363 -0.0005000 0.0000425   741.8329636 -0.0001336 0.2500
 2090:  36  7 29  1 37  7 30  0               741.8465500   741.8464354  0.0001146 -0.0005000 0.0000582
 2091:  15  6 10  1 16  7  9  0               741.8804900   741.8800669  0.0004231 -0.0005000 0.0000176   741.8801032  0.0003868 0.5000
 2092:  15  6  9  1 16  7 10  0               741.8804900   741.8801394  0.0003506 -0.0005000 0.0000176   741.8801032  0.0003868 0.5000
 2093:  37  4 33  1 38  4 34  0               741.8906500   741.8906341  0.0000159 -0.0005000 0.0000452
 2094:  41  0 41  1 42  1 42  0               741.9006900   741.9011254 -0.0004354 -0.0005000 0.0000553   741.9009441 -0.0002541 0.1667
 2095:  41  1 41  1 42  0 42  0               741.9006900   741.9011254 -0.0004354 -0.0005000 0.0000553   741.9009441 -0.0002541 0.1667
 2096:   8  8  1  1  9  9  0  0               741.9006900   741.9005816  0.0001084 -0.0005000 0.0000553   741.9009441 -0.0002541 0.1667
 2097:  41  1 41  1 42  1 42  0               741.9006900   741.9011254 -0.0004354 -0.0005000 0.0000553   741.9009441 -0.0002541 0.1667
 2098:   8  8  0  1  9  9  1  0               741.9006900   741.9005816  0.0001084 -0.0005000 0.0000553   741.9009441 -0.0002541 0.1667
 2099:  41  0 41  1 42  0 42  0               741.9006900   741.9011254 -0.0004354 -0.0005000 0.0000553   741.9009441 -0.0002541 0.1667
 2100:  35  6 29  1 36  6 30  0               741.9068000   741.9075935 -0.0007935 -0.0005000 0.0000420   741.9068237 -0.0000237 0.1667
 2101:  38  3 35  1 39  4 36  0               741.9068000   741.9062378  0.0005622 -0.0005000 0.0000420   741.9068237 -0.0000237 0.1667
 2102:  40  2 39  1 41  1 40  0               741.9068000   741.9067818  0.0000182 -0.0005000 0.0000420   741.9068237 -0.0000237 0.1667
 2103:  40  2 39  1 41  2 40  0               741.9068000   741.9067786  0.0000214 -0.0005000 0.0000420   741.9068237 -0.0000237 0.1667
 2104:  40  1 39  1 41  2 40  0               741.9068000   741.9067737  0.0000263 -0.0005000 0.0000420   741.9068237 -0.0000237 0.1667
 2105:  40  1 39  1 41  1 40  0               741.9068000   741.9067769  0.0000231 -0.0005000 0.0000420   741.9068237 -0.0000237 0.1667
 2106:  39  3 37  1 40  3 38  0               741.9110400   741.9110840 -0.0000440 -0.0005000 0.0000593   741.9110092  0.0000308 0.3333
 2107:  39  2 37  1 40  2 38  0               741.9110400   741.9109997  0.0000403 -0.0005000 0.0000593   741.9110092  0.0000308 0.3333
 2108:  38  3 35  1 39  3 36  0               741.9110400   741.9109438  0.0000962 -0.0005000 0.0000593   741.9110092  0.0000308 0.3333
 2109:  37 16 21  1 38 16 22  0               741.9126900   741.9128884 -0.0001984 -0.0005000 0.0000453   741.9129353 -0.0002453 0.3333
 2110:  38  4 35  1 39  4 36  0               741.9126900   741.9130293 -0.0003393 -0.0005000 0.0000453   741.9129353 -0.0002453 0.3333
 2111:  37 16 22  1 38 16 23  0               741.9126900   741.9128884 -0.0001984 -0.0005000 0.0000453   741.9129353 -0.0002453 0.3333
 2112:  36  7 30  1 37  7 31  0               741.9244100   741.9244335 -0.0000235 -0.0005000 0.0000425
 2113:  36  8 29  1 37  8 30  0               741.9347900   741.9347282  0.0000618 -0.0005000 0.0000405
 2114:  36 10 27  1 37 10 28  0               741.9744800   741.9734716  0.0010084 -0.0005000 0.0000371
 2115:  39  2 38  1 40  2 39  0               742.0186900   742.0184048  0.0002852 -0.0005000 0.0000553   742.0184034  0.0002866 0.2500
 2116:  39  1 38  1 40  1 39  0               742.0186900   742.0184020  0.0002880 -0.0005000 0.0000553   742.0184034  0.0002866 0.2500
 2117:  39  1 38  1 40  2 39  0               742.0186900   742.0183970  0.0002930 -0.0005000 0.0000553   742.0184034  0.0002866 0.2500
 2118:  39  2 38  1 40  1 39  0               742.0186900   742.0184097  0.0002803 -0.0005000 0.0000553   742.0184034  0.0002866 0.2500
 2119:  37  4 34  1 38  4 35  0               742.0236400   742.0242931 -0.0006531 -0.0005000 0.0000530
 2120:  36 15 21  1 37 15 22  0               742.0314900   742.0305937  0.0008963 -0.0005000 0.0000549   742.0305937  0.0008963 0.5000
 2121:  36 15 22  1 37 15 23  0               742.0314900   742.0305937  0.0008963 -0.0005000 0.0000549   742.0305937  0.0008963 0.5000
 2122:  34  6 28  1 35  6 29  0               742.0467200   742.0476758 -0.0009558 -0.0005000 0.0000644
 2123:  34  5 29  1 35  5 30  0               742.0594400   742.0594178  0.0000222 -0.0005000 0.0000627
 2124:  10  7  3  1 11  8  4  0               742.0733600   742.0739103 -0.0005503 -0.0005000 0.0000177   742.0737509 -0.0003909 0.3333
 2125:  35  6 30  1 36  6 31  0               742.0733600   742.0734322 -0.0000722 -0.0005000 0.0000177   742.0737509 -0.0003909 0.3333
 2126:  10  7  4  1 11  8  3  0               742.0733600   742.0739103 -0.0005503 -0.0005000 0.0000177   742.0737509 -0.0003909 0.3333
 2127:  35  9 27  1 36  9 28  0               742.0855000   742.0860777 -0.0005777 -0.0005000 0.0000464   742.0853592  0.0001408 0.2500
 2128:  35  9 26  1 36  9 27  0               742.0855000   742.0850881  0.0004119 -0.0005000 0.0000464   742.0853592  0.0001408 0.2500
 2129:  36 21 15  1 37 21 16  0               742.0855000   742.0851355  0.0003645 -0.0005000 0.0000464   742.0853592  0.0001408 0.2500
 2130:  36 21 16  1 37 21 17  0               742.0855000   742.0851355  0.0003645 -0.0005000 0.0000464   742.0853592  0.0001408 0.2500
 2131:  35  4 31  1 36  4 32  0               742.1007400   742.1006116  0.0001284 -0.0005000 0.0000412
 2132:  13  6  7  1 14  7  8  0               742.1244900   742.1254038 -0.0009138 -0.0005000 0.0000451   742.1249132 -0.0004232 0.1250
 2133:  39  1 39  1 40  1 40  0               742.1244900   742.1246276 -0.0001376 -0.0005000 0.0000451   742.1249132 -0.0004232 0.1250
 2134:  36 25 12  1 37 25 13  0               742.1244900   742.1249999 -0.0005099 -0.0005000 0.0000451   742.1249132 -0.0004232 0.1250
 2135:  39  1 39  1 40  0 40  0               742.1244900   742.1246277 -0.0001377 -0.0005000 0.0000451   742.1249132 -0.0004232 0.1250
 2136:  13  6  8  1 14  7  7  0               742.1244900   742.1253914 -0.0009014 -0.0005000 0.0000451   742.1249132 -0.0004232 0.1250
 2137:  39  0 39  1 40  0 40  0               742.1244900   742.1246276 -0.0001376 -0.0005000 0.0000451   742.1249132 -0.0004232 0.1250
 2138:  39  0 39  1 40  1 40  0               742.1244900   742.1246275 -0.0001375 -0.0005000 0.0000451   742.1249132 -0.0004232 0.1250
 2139:  36 25 11  1 37 25 12  0               742.1244900   742.1249999 -0.0005099 -0.0005000 0.0000451   742.1249132 -0.0004232 0.1250
 2140:  38  1 37  1 39  1 38  0               742.1300600   742.1299608  0.0000992 -0.0005000 0.0000547   742.1299630  0.0000970 0.2500
 2141:  38  2 37  1 39  1 38  0               742.1300600   742.1299728  0.0000872 -0.0005000 0.0000547   742.1299630  0.0000970 0.2500
 2142:  38  2 37  1 39  2 38  0               742.1300600   742.1299651  0.0000949 -0.0005000 0.0000547   742.1299630  0.0000970 0.2500
 2143:  38  1 37  1 39  2 38  0               742.1300600   742.1299531  0.0001069 -0.0005000 0.0000547   742.1299630  0.0000970 0.2500
 2144:  37  3 35  1 38  3 36  0               742.1338900   742.1338217  0.0000683 -0.0005000 0.0000543   742.1337282  0.0001618 0.2500
 2145:  37  2 35  1 38  3 36  0               742.1338900   742.1332597  0.0006303 -0.0005000 0.0000543   742.1337282  0.0001618 0.2500
 2146:  37  3 35  1 38  2 36  0               742.1338900   742.1341966 -0.0003066 -0.0005000 0.0000543   742.1337282  0.0001618 0.2500
 2147:  37  2 35  1 38  2 36  0               742.1338900   742.1336347  0.0002553 -0.0005000 0.0000543   742.1337282  0.0001618 0.2500
 2148:  35  5 31  1 36  5 32  0               742.1439200   742.1442732 -0.0003532 -0.0005000 0.0000398
 2149:  35 16 19  1 36 16 20  0               742.1668600   742.1663602  0.0004998 -0.0005000 0.0000590   742.1663602  0.0004998 0.5000
 2150:  35 16 20  1 36 16 21  0               742.1668600   742.1663602  0.0004998 -0.0005000 0.0000590   742.1663602  0.0004998 0.5000
 2151:  33  5 28  1 34  5 29  0               742.1782700   742.1785111 -0.0002411 -0.0005000 0.0000621
 2152:  35 18 17  1 36 18 18  0               742.1843600   742.1839392  0.0004208 -0.0005000 0.0000458   742.1840642  0.0002958 0.3333
 2153:  35 18 18  1 36 18 19  0               742.1843600   742.1839392  0.0004208 -0.0005000 0.0000458   742.1840642  0.0002958 0.3333
 2154:  16  5 12  1 17  6 11  0               742.1843600   742.1843141  0.0000459 -0.0005000 0.0000458   742.1840642  0.0002958 0.3333
 2155:  34  8 27  1 35  8 28  0               742.1971300   742.1972402 -0.0001102 -0.0005000 0.0000183   742.1973691 -0.0002391 0.3333
 2156:   9  7  2  1 10  8  3  0               742.1971300   742.1974335 -0.0003035 -0.0005000 0.0000183   742.1973691 -0.0002391 0.3333
 2157:   9  7  3  1 10  8  2  0               742.1971300   742.1974335 -0.0003035 -0.0005000 0.0000183   742.1973691 -0.0002391 0.3333
 2158:  34  4 30  1 35  4 31  0               742.2049600   742.2045780  0.0003820 -0.0005000 0.0000412
 2159:  34  9 26  1 35  9 27  0               742.2160600   742.2164298 -0.0003698 -0.0005000 0.0000348   742.2161177 -0.0000577 0.5000
 2160:  34  9 25  1 35  9 26  0               742.2160600   742.2158056  0.0002544 -0.0005000 0.0000348   742.2161177 -0.0000577 0.5000
 2161:  38  0 38  1 39  1 39  0               742.2363700   742.2362841  0.0000859 -0.0005000 0.0000778   742.2362842  0.0000858 0.2500
 2162:  38  1 38  1 39  1 39  0               742.2363700   742.2362842  0.0000858 -0.0005000 0.0000778   742.2362842  0.0000858 0.2500
 2163:  38  1 38  1 39  0 39  0               742.2363700   742.2362843  0.0000857 -0.0005000 0.0000778   742.2362842  0.0000858 0.2500
 2164:  38  0 38  1 39  0 39  0               742.2363700   742.2362842  0.0000858 -0.0005000 0.0000778   742.2362842  0.0000858 0.2500
 2165:  37  2 36  1 38  2 37  0               742.2412700   742.2414596 -0.0001896 -0.0005000 0.0000425   742.2411160  0.0001540 0.1429
 2166:  35 24 12  1 36 24 13  0               742.2412700   742.2404218  0.0008482 -0.0005000 0.0000425   742.2411160  0.0001540 0.1429
 2167:  37  2 36  1 38  1 37  0               742.2412700   742.2414715 -0.0002015 -0.0005000 0.0000425   742.2411160  0.0001540 0.1429
 2168:  35 24 11  1 36 24 12  0               742.2412700   742.2404218  0.0008482 -0.0005000 0.0000425   742.2411160  0.0001540 0.1429
 2169:  37  1 36  1 38  2 37  0               742.2412700   742.2414410 -0.0001710 -0.0005000 0.0000425   742.2411160  0.0001540 0.1429
 2170:  35  3 32  1 36  3 33  0               742.2412700   742.2411431  0.0001269 -0.0005000 0.0000425   742.2411160  0.0001540 0.1429
 2171:  37  1 36  1 38  1 37  0               742.2412700   742.2414530 -0.0001830 -0.0005000 0.0000425   742.2411160  0.0001540 0.1429
 2172:  36  2 34  1 37  2 35  0               742.2452800   742.2448134  0.0004666 -0.0005000 0.0000381   742.2450302  0.0002498 0.1667
 2173:  36  3 34  1 37  2 35  0               742.2452800   742.2456510 -0.0003710 -0.0005000 0.0000381   742.2450302  0.0002498 0.1667
 2174:  34 11 24  1 35 11 25  0               742.2452800   742.2451881  0.0000919 -0.0005000 0.0000381   742.2450302  0.0002498 0.1667
 2175:  36  3 34  1 37  3 35  0               742.2452800   742.2450901  0.0001899 -0.0005000 0.0000381   742.2450302  0.0002498 0.1667
 2176:  34 11 23  1 35 11 24  0               742.2452800   742.2451859  0.0000941 -0.0005000 0.0000381   742.2450302  0.0002498 0.1667
 2177:  36  2 34  1 37  3 35  0               742.2452800   742.2442524  0.0010276 -0.0005000 0.0000381   742.2450302  0.0002498 0.1667
 2178:  36 35  2  1 37 35  3  0               742.2476800   742.2478280 -0.0001480 -0.0005000 0.0001741   742.2478808 -0.0002008 0.1667
 2179:  22  4 18  1 23  5 19  0               742.2476800   742.2478536 -0.0001736 -0.0005000 0.0001741   742.2478808 -0.0002008 0.1667
 2180:  36 35  1  1 37 35  2  0               742.2476800   742.2478280 -0.0001480 -0.0005000 0.0001741   742.2478808 -0.0002008 0.1667
 2181:  12  6  6  1 13  7  7  0               742.2476800   742.2484218 -0.0007418 -0.0005000 0.0001741   742.2478808 -0.0002008 0.1667
 2182:  35  4 32  1 36  4 33  0               742.2476800   742.2469361  0.0007439 -0.0005000 0.0001741   742.2478808 -0.0002008 0.1667
 2183:  12  6  7  1 13  7  6  0               742.2476800   742.2484173 -0.0007373 -0.0005000 0.0001741   742.2478808 -0.0002008 0.1667
 2184:  34 12 22  1 35 12 23  0               742.2567900   742.2562300  0.0005600 -0.0005000 0.0000403   742.2562300  0.0005600 0.5000
 2185:  34 12 23  1 35 12 24  0               742.2567900   742.2562300  0.0005600 -0.0005000 0.0000403   742.2562300  0.0005600 0.5000
 2186:  32  5 27  1 33  5 28  0               742.3016200   742.3017937 -0.0001737 -0.0005000 0.0000450   742.3015824  0.0000376 0.3333
 2187:  34 17 18  1 35 17 19  0               742.3016200   742.3014768  0.0001432 -0.0005000 0.0000450   742.3015824  0.0000376 0.3333
 2188:  34 17 17  1 35 17 18  0               742.3016200   742.3014768  0.0001432 -0.0005000 0.0000450   742.3015824  0.0000376 0.3333
 2189:  15  5 10  1 16  6 11  0               742.3079500   742.3076466  0.0003034 -0.0005000 0.0001156   742.3077933  0.0001567 0.2500
 2190:  35 30  6  1 36 30  7  0               742.3079500   742.3075570  0.0003930 -0.0005000 0.0001156   742.3077933  0.0001567 0.2500
 2191:  33  4 29  1 34  4 30  0               742.3079500   742.3084128 -0.0004628 -0.0005000 0.0001156   742.3077933  0.0001567 0.2500
 2192:  35 30  5  1 36 30  6  0               742.3079500   742.3075570  0.0003930 -0.0005000 0.0001156   742.3077933  0.0001567 0.2500
 2193:  35 31  5  1 36 31  6  0               742.3209500   742.3199848  0.0009652 -0.0005000 0.0001385   742.3204662  0.0004838 0.2500
 2194:   8  7  1  1  9  8  2  0               742.3209500   742.3209476  0.0000024 -0.0005000 0.0001385   742.3204662  0.0004838 0.2500
 2195:   8  7  2  1  9  8  1  0               742.3209500   742.3209476  0.0000024 -0.0005000 0.0001385   742.3204662  0.0004838 0.2500
 2196:  35 31  4  1 36 31  5  0               742.3209500   742.3199848  0.0009652 -0.0005000 0.0001385   742.3204662  0.0004838 0.2500
 2197:  37  0 37  1 38  1 38  0               742.3478000   742.3478775 -0.0000775 -0.0005000 0.0000770   742.3478778 -0.0000778 0.2500
 2198:  37  1 37  1 38  0 38  0               742.3478000   742.3478780 -0.0000780 -0.0005000 0.0000770   742.3478778 -0.0000778 0.2500
 2199:  37  0 37  1 38  0 38  0               742.3478000   742.3478777 -0.0000777 -0.0005000 0.0000770   742.3478778 -0.0000778 0.2500
 2200:  37  1 37  1 38  1 38  0               742.3478000   742.3478778 -0.0000778 -0.0005000 0.0000770   742.3478778 -0.0000778 0.2500
 2201:  36  1 35  1 37  2 36  0               742.3527700   742.3528593 -0.0000893 -0.0005000 0.0000540   742.3528830 -0.0001130 0.2500
 2202:  36  2 35  1 37  2 36  0               742.3527700   742.3528881 -0.0001181 -0.0005000 0.0000540   742.3528830 -0.0001130 0.2500
 2203:  36  2 35  1 37  1 36  0               742.3527700   742.3529066 -0.0001366 -0.0005000 0.0000540   742.3528830 -0.0001130 0.2500
 2204:  36  1 35  1 37  1 36  0               742.3527700   742.3528779 -0.0001079 -0.0005000 0.0000540   742.3528830 -0.0001130 0.2500
 2205:  35  2 33  1 36  2 34  0               742.3557800   742.3558884 -0.0001084 -0.0005000 0.0000488   742.3560923 -0.0003123 0.5000
 2206:  35  3 33  1 36  3 34  0               742.3557800   742.3562961 -0.0005161 -0.0005000 0.0000488   742.3560923 -0.0003123 0.5000
 2207:  32  7 25  1 33  7 26  0               742.4168000   742.4166900  0.0001100 -0.0005000 0.0000390
 2208:  14  5 10  1 15  6  9  0               742.4272200   742.4270592  0.0001608 -0.0005000 0.0000335   742.4276363 -0.0004163 0.2500
 2209:  33 17 17  1 34 17 18  0               742.4272200   742.4276771 -0.0004571 -0.0005000 0.0000335   742.4276363 -0.0004163 0.2500
 2210:  14  5  9  1 15  6 10  0               742.4272200   742.4281320 -0.0009120 -0.0005000 0.0000335   742.4276363 -0.0004163 0.2500
 2211:  33 17 16  1 34 17 17  0               742.4272200   742.4276771 -0.0004571 -0.0005000 0.0000335   742.4276363 -0.0004163 0.2500
 2212:  31  5 26  1 32  5 27  0               742.4295400   742.4291564  0.0003836 -0.0005000 0.0000590
 2213:  32  6 27  1 33  6 28  0               742.4444400   742.4434890  0.0009510 -0.0005000 0.0000178   742.4441185  0.0003215 0.3333
 2214:   7  7  1  1  8  8  0  0               742.4444400   742.4444333  0.0000067 -0.0005000 0.0000178   742.4441185  0.0003215 0.3333
 2215:   7  7  0  1  8  8  1  0               742.4444400   742.4444333  0.0000067 -0.0005000 0.0000178   742.4441185  0.0003215 0.3333
 2216:  36  1 36  1 37  0 37  0               742.4589700   742.4594086 -0.0004386 -0.0005000 0.0000929   742.4590351 -0.0000651 0.1250
 2217:  36  0 36  1 37  0 37  0               742.4589700   742.4594081 -0.0004381 -0.0005000 0.0000929   742.4590351 -0.0000651 0.1250
 2218:  34 32  2  1 35 32  3  0               742.4589700   742.4583384  0.0006316 -0.0005000 0.0000929   742.4590351 -0.0000651 0.1250
 2219:  32  8 25  1 33  8 26  0               742.4589700   742.4588745  0.0000955 -0.0005000 0.0000929   742.4590351 -0.0000651 0.1250
 2220:  36  0 36  1 37  1 37  0               742.4589700   742.4594078 -0.0004378 -0.0005000 0.0000929   742.4590351 -0.0000651 0.1250
 2221:  34 32  3  1 35 32  4  0               742.4589700   742.4583384  0.0006316 -0.0005000 0.0000929   742.4590351 -0.0000651 0.1250
 2222:  33  3 30  1 34  3 31  0               742.4589700   742.4590969 -0.0001269 -0.0005000 0.0000929   742.4590351 -0.0000651 0.1250
 2223:  36  1 36  1 37  1 37  0               742.4589700   742.4594083 -0.0004383 -0.0005000 0.0000929   742.4590351 -0.0000651 0.1250
 2224:  35  2 34  1 36  1 35  0               742.4642600   742.4642792 -0.0000192 -0.0005000 0.0000536   742.4642427  0.0000173 0.2500
 2225:  35  1 34  1 36  2 35  0               742.4642600   742.4642062  0.0000538 -0.0005000 0.0000536   742.4642427  0.0000173 0.2500
 2226:  35  1 34  1 36  1 35  0               742.4642600   742.4642349  0.0000251 -0.0005000 0.0000536   742.4642427  0.0000173 0.2500
 2227:  35  2 34  1 36  2 35  0               742.4642600   742.4642505  0.0000095 -0.0005000 0.0000536   742.4642427  0.0000173 0.2500
 2228:  33  4 30  1 34  4 31  0               742.4697000   742.4700603 -0.0003603 -0.0005000 0.0000415   742.4693739  0.0003261 0.5000
 2229:  34  3 32  1 35  2 33  0               742.4697000   742.4686874  0.0010126 -0.0005000 0.0000415   742.4693739  0.0003261 0.5000
 2230:  32  9 23  1 33  9 24  0               742.4765900   742.4757791  0.0008109 -0.0005000 0.0000274   742.4760217  0.0005683 0.3333
 2231:  18  4 14  1 19  5 15  0               742.4765900   742.4762712  0.0003188 -0.0005000 0.0000274   742.4760217  0.0005683 0.3333
 2232:  32  9 24  1 33  9 25  0               742.4765900   742.4760147  0.0005753 -0.0005000 0.0000274   742.4760217  0.0005683 0.3333
 2233:  31  6 25  1 32  6 26  0               742.4789200   742.4795296 -0.0006096 -0.0005000 0.0000485
 2234:  31  4 27  1 32  4 28  0               742.5181800   742.5185789 -0.0003989 -0.0005000 0.0000456
 2235:  32 15 17  1 33 15 18  0               742.5370900   742.5372067 -0.0001167 -0.0005000 0.0000534   742.5372067 -0.0001167 0.5000
 2236:  32 15 18  1 33 15 19  0               742.5370900   742.5372067 -0.0001167 -0.0005000 0.0000534   742.5372067 -0.0001167 0.5000
 2237:  30  5 25  1 31  5 26  0               742.5605900   742.5603714  0.0002186 -0.0005000 0.0000566
 2238:  35  1 35  1 36  0 36  0               742.5709300   742.5708760  0.0000540 -0.0005000 0.0000856   742.5708639  0.0000661 0.1250
 2239:  33 31  3  1 34 31  4  0               742.5709300   742.5710161 -0.0000861 -0.0005000 0.0000856   742.5708639  0.0000661 0.1250
 2240:  35  0 35  1 36  0 36  0               742.5709300   742.5708753  0.0000547 -0.0005000 0.0000856   742.5708639  0.0000661 0.1250
 2241:  32 19 14  1 33 19 15  0               742.5709300   742.5706889  0.0002411 -0.0005000 0.0000856   742.5708639  0.0000661 0.1250
 2242:  33 31  2  1 34 31  3  0               742.5709300   742.5710161 -0.0000861 -0.0005000 0.0000856   742.5708639  0.0000661 0.1250
 2243:  35  1 35  1 36  1 36  0               742.5709300   742.5708756  0.0000544 -0.0005000 0.0000856   742.5708639  0.0000661 0.1250
 2244:  35  0 35  1 36  1 36  0               742.5709300   742.5708749  0.0000551 -0.0005000 0.0000856   742.5708639  0.0000661 0.1250
 2245:  32 19 13  1 33 19 14  0               742.5709300   742.5706889  0.0002411 -0.0005000 0.0000856   742.5708639  0.0000661 0.1250
 2246:  34  2 33  1 35  2 34  0               742.5751800   742.5755470 -0.0003670 -0.0005000 0.0000503   742.5755955 -0.0004155 0.2000
 2247:  34  2 33  1 35  1 34  0               742.5751800   742.5755913 -0.0004113 -0.0005000 0.0000503   742.5755955 -0.0004155 0.2000
 2248:  34  1 33  1 35  2 34  0               742.5751800   742.5754787 -0.0002987 -0.0005000 0.0000503   742.5755955 -0.0004155 0.2000
 2249:  34  1 33  1 35  1 34  0               742.5751800   742.5755230 -0.0003430 -0.0005000 0.0000503   742.5755955 -0.0004155 0.2000
 2250:  33  2 31  1 34  3 32  0               742.5751800   742.5758376 -0.0006576 -0.0005000 0.0000503   742.5755955 -0.0004155 0.2000
 2251:  31  8 23  1 32  8 24  0               742.5870700   742.5873093 -0.0002393 -0.0005000 0.0000230   742.5874102 -0.0003402 0.2000
 2252:  17  9  9  1 17 10  8  0               742.5870700   742.5876288 -0.0005588 -0.0005000 0.0000230   742.5874102 -0.0003402 0.2000
 2253:  16  9  8  1 16 10  7  0               742.5870700   742.5872420 -0.0001720 -0.0005000 0.0000230   742.5874102 -0.0003402 0.2000
 2254:  17  9  8  1 17 10  7  0               742.5870700   742.5876288 -0.0005588 -0.0005000 0.0000230   742.5874102 -0.0003402 0.2000
 2255:  16  9  7  1 16 10  6  0               742.5870700   742.5872420 -0.0001720 -0.0005000 0.0000230   742.5874102 -0.0003402 0.2000
 2256:  24  9 16  1 24 10 15  0               742.5972300   742.5975047 -0.0002747 -0.0005000 0.0001283   742.5973621 -0.0001321 0.1429
 2257:  16  4 13  1 17  5 12  0               742.5972300   742.5970176  0.0002124 -0.0005000 0.0001283   742.5973621 -0.0001321 0.1429
 2258:  33 33  1  1 34 33  2  0               742.5972300   742.5969803  0.0002497 -0.0005000 0.0001283   742.5973621 -0.0001321 0.1429
 2259:  33 33  0  1 34 33  1  0               742.5972300   742.5969803  0.0002497 -0.0005000 0.0001283   742.5973621 -0.0001321 0.1429
 2260:  24  9 15  1 24 10 14  0               742.5972300   742.5975065 -0.0002765 -0.0005000 0.0001283   742.5973621 -0.0001321 0.1429
 2261:  32 22 11  1 33 22 12  0               742.5972300   742.5977726 -0.0005426 -0.0005000 0.0001283   742.5973621 -0.0001321 0.1429
 2262:  32 22 10  1 33 22 11  0               742.5972300   742.5977726 -0.0005426 -0.0005000 0.0001283   742.5973621 -0.0001321 0.1429
 2263:  31 10 21  1 32 10 22  0               742.6184500   742.6181115  0.0003385 -0.0005000 0.0000198   742.6182228  0.0002272 0.2500
 2264:  31 10 22  1 32 10 23  0               742.6184500   742.6181192  0.0003308 -0.0005000 0.0000198   742.6182228  0.0002272 0.2500
 2265:   9  6  4  1 10  7  3  0               742.6184500   742.6183302  0.0001198 -0.0005000 0.0000198   742.6182228  0.0002272 0.2500
 2266:   9  6  3  1 10  7  4  0               742.6184500   742.6183303  0.0001197 -0.0005000 0.0000198   742.6182228  0.0002272 0.2500
 2267:  31 14 18  1 32 14 19  0               742.6546300   742.6553506 -0.0007206 -0.0005000 0.0000484   742.6553506 -0.0007206 0.5000
 2268:  31 14 17  1 32 14 18  0               742.6546300   742.6553506 -0.0007206 -0.0005000 0.0000484   742.6553506 -0.0007206 0.5000
 2269:  31 15 16  1 32 15 17  0               742.6626000   742.6634721 -0.0008721 -0.0005000 0.0000533   742.6634721 -0.0008721 0.5000
 2270:  31 15 17  1 32 15 18  0               742.6626000   742.6634721 -0.0008721 -0.0005000 0.0000533   742.6634721 -0.0008721 0.5000
 2271:  34  1 34  1 35  1 35  0               742.6821900   742.6822796 -0.0000896 -0.0005000 0.0000750   742.6822794 -0.0000894 0.2500
 2272:  34  0 34  1 35  1 35  0               742.6821900   742.6822785 -0.0000885 -0.0005000 0.0000750   742.6822794 -0.0000894 0.2500
 2273:  34  0 34  1 35  0 35  0               742.6821900   742.6822792 -0.0000892 -0.0005000 0.0000750   742.6822794 -0.0000894 0.2500
 2274:  34  1 34  1 35  0 35  0               742.6821900   742.6822803 -0.0000903 -0.0005000 0.0000750   742.6822794 -0.0000894 0.2500
 2275:  33  1 32  1 34  1 33  0               742.6867400   742.6867410 -0.0000010 -0.0005000 0.0000522   742.6867594 -0.0000194 0.2500
 2276:  33  1 32  1 34  2 33  0               742.6867400   742.6866729  0.0000671 -0.0005000 0.0000522   742.6867594 -0.0000194 0.2500
 2277:  33  2 32  1 34  2 33  0               742.6867400   742.6867777 -0.0000377 -0.0005000 0.0000522   742.6867594 -0.0000194 0.2500
 2278:  33  2 32  1 34  1 33  0               742.6867400   742.6868459 -0.0001059 -0.0005000 0.0000522   742.6867594 -0.0000194 0.2500
 2279:  32  2 30  1 33  2 31  0               742.6884500   742.6883466  0.0001034 -0.0005000 0.0000467   742.6880824  0.0003676 0.3333
 2280:  31 18 14  1 32 18 15  0               742.6884500   742.6879504  0.0004996 -0.0005000 0.0000467   742.6880824  0.0003676 0.3333
 2281:  31 18 13  1 32 18 14  0               742.6884500   742.6879504  0.0004996 -0.0005000 0.0000467   742.6880824  0.0003676 0.3333
 2282:  31  4 28  1 32  4 29  0               742.6952300   742.6942344  0.0009956 -0.0005000 0.0000362   742.6949935  0.0002365 0.3333
 2283:  30  6 25  1 31  6 26  0               742.6952300   742.6956424 -0.0004124 -0.0005000 0.0000362   742.6949935  0.0002365 0.3333
 2284:  29  5 24  1 30  5 25  0               742.6952300   742.6951036  0.0001264 -0.0005000 0.0000362   742.6949935  0.0002365 0.3333
 2285:  30  7 24  1 31  7 25  0               742.7022400   742.7021970  0.0000430 -0.0005000 0.0000332
 2286:  30  5 26  1 31  5 27  0               742.7268700   742.7272295 -0.0003595 -0.0005000 0.0000338
 2287:  29  4 25  1 30  4 26  0               742.7374700   742.7376603 -0.0001903 -0.0005000 0.0000485
 2288:  30 10 21  1 31 10 22  0               742.7459500   742.7461372 -0.0001872 -0.0005000 0.0000325   742.7461351 -0.0001851 0.5000
 2289:  30 10 20  1 31 10 21  0               742.7459500   742.7461330 -0.0001830 -0.0005000 0.0000325   742.7461351 -0.0001851 0.5000
 2290:  29  6 23  1 30  6 24  0               742.7678400   742.7675923  0.0002477 -0.0005000 0.0000405
 2291:  30 14 16  1 31 14 17  0               742.7823500   742.7816784  0.0006716 -0.0005000 0.0000484   742.7816784  0.0006716 0.5000
 2292:  30 14 17  1 31 14 18  0               742.7823500   742.7816784  0.0006716 -0.0005000 0.0000484   742.7816784  0.0006716 0.5000
 2293:  29  3 26  1 30  4 27  0               742.7886000   742.7878776  0.0007224 -0.0005000 0.0000326
 2294:  33  0 33  1 34  0 34  0               742.7935800   742.7936196 -0.0000396 -0.0005000 0.0000493   742.7937336 -0.0001536 0.1667
 2295:  33  1 33  1 34  1 34  0               742.7935800   742.7936203 -0.0000403 -0.0005000 0.0000493   742.7937336 -0.0001536 0.1667
 2296:  11  5  7  1 12  6  6  0               742.7935800   742.7939142 -0.0003342 -0.0005000 0.0000493   742.7937336 -0.0001536 0.1667
 2297:  33  0 33  1 34  1 34  0               742.7935800   742.7936185 -0.0000385 -0.0005000 0.0000493   742.7937336 -0.0001536 0.1667
 2298:  11  5  6  1 12  6  7  0               742.7935800   742.7940075 -0.0004275 -0.0005000 0.0000493   742.7937336 -0.0001536 0.1667
 2299:  33  1 33  1 34  0 34  0               742.7935800   742.7936214 -0.0000414 -0.0005000 0.0000493   742.7937336 -0.0001536 0.1667
 2300:  32  1 31  1 33  1 32  0               742.7978300   742.7978872 -0.0000572 -0.0005000 0.0000652   742.7976533  0.0001767 0.1250
 2301:  30 16 14  1 31 16 15  0               742.7978300   742.7974952  0.0003348 -0.0005000 0.0000652   742.7976533  0.0001767 0.1250
 2302:  30 16 15  1 31 16 16  0               742.7978300   742.7974952  0.0003348 -0.0005000 0.0000652   742.7976533  0.0001767 0.1250
 2303:  32  2 31  1 33  2 32  0               742.7978300   742.7979431 -0.0001131 -0.0005000 0.0000652   742.7976533  0.0001767 0.1250
 2304:  31 29  3  1 32 29  4  0               742.7978300   742.7972876  0.0005424 -0.0005000 0.0000652   742.7976533  0.0001767 0.1250
 2305:  32  1 31  1 33  2 32  0               742.7978300   742.7977826  0.0000474 -0.0005000 0.0000652   742.7976533  0.0001767 0.1250
 2306:  31 29  2  1 32 29  3  0               742.7978300   742.7972876  0.0005424 -0.0005000 0.0000652   742.7976533  0.0001767 0.1250
 2307:  32  2 31  1 33  1 32  0               742.7978300   742.7980477 -0.0002177 -0.0005000 0.0000652   742.7976533  0.0001767 0.1250
 2308:  31  3 29  1 32  3 30  0               742.8010000   742.8006597  0.0003403 -0.0005000 0.0000394
 2309:  30 18 12  1 31 18 13  0               742.8133100   742.8136476 -0.0003376 -0.0005000 0.0000684   742.8136476 -0.0003376 0.5000
 2310:  30 18 13  1 31 18 14  0               742.8133100   742.8136476 -0.0003376 -0.0005000 0.0000684   742.8136476 -0.0003376 0.5000
 2311:  30 19 12  1 31 19 13  0               742.8230900   742.8220117  0.0010783 -0.0005000 0.0000408   742.8227604  0.0003296 0.2500
 2312:  29  6 24  1 30  6 25  0               742.8230900   742.8230040  0.0000860 -0.0005000 0.0000408   742.8227604  0.0003296 0.2500
 2313:  29  7 22  1 30  7 23  0               742.8230900   742.8240142 -0.0009242 -0.0005000 0.0000408   742.8227604  0.0003296 0.2500
 2314:  30 19 11  1 31 19 12  0               742.8230900   742.8220117  0.0010783 -0.0005000 0.0000408   742.8227604  0.0003296 0.2500
 2315:  28  5 23  1 29  5 24  0               742.8327000   742.8328900 -0.0001900 -0.0005000 0.0000399   742.8326454  0.0000546 0.5000
 2316:  29  7 23  1 30  7 24  0               742.8327000   742.8324007  0.0002993 -0.0005000 0.0000399   742.8326454  0.0000546 0.5000
 2317:  30 22  8  1 31 22  9  0               742.8479900   742.8486951 -0.0007051 -0.0005000 0.0000349   742.8483626 -0.0003726 0.1667
 2318:  29  5 25  1 30  5 26  0               742.8479900   742.8471436  0.0008464 -0.0005000 0.0000349   742.8483626 -0.0003726 0.1667
 2319:  29  8 22  1 30  8 23  0               742.8479900   742.8488423 -0.0008523 -0.0005000 0.0000349   742.8483626 -0.0003726 0.1667
 2320:  30 22  9  1 31 22 10  0               742.8479900   742.8486951 -0.0007051 -0.0005000 0.0000349   742.8483626 -0.0003726 0.1667
 2321:  14  4 11  1 15  5 10  0               742.8479900   742.8487105 -0.0007205 -0.0005000 0.0000349   742.8483626 -0.0003726 0.1667
 2322:  29  8 21  1 30  8 22  0               742.8479900   742.8480891 -0.0000991 -0.0005000 0.0000349   742.8483626 -0.0003726 0.1667
 2323:  29  9 21  1 30  9 22  0               742.8630200   742.8627018  0.0003182 -0.0005000 0.0000303   742.8626781  0.0003419 0.5000
 2324:  29  9 20  1 30  9 21  0               742.8630200   742.8626545  0.0003655 -0.0005000 0.0000303   742.8626781  0.0003419 0.5000
 2325:  29 10 19  1 30 10 20  0               742.8744700   742.8738743  0.0005957 -0.0005000 0.0000319   742.8738754  0.0005946 0.5000
 2326:  29 10 20  1 30 10 21  0               742.8744700   742.8738765  0.0005935 -0.0005000 0.0000319   742.8738754  0.0005946 0.5000
 2327:  29  3 26  1 30  3 27  0               742.8867900   742.8866807  0.0001093 -0.0005000 0.0000326
 2328:  32  1 32  1 33  0 33  0               742.9047400   742.9048994 -0.0001594 -0.0005000 0.0000727   742.9048971 -0.0001571 0.2500
 2329:  32  0 32  1 33  1 33  0               742.9047400   742.9048948 -0.0001548 -0.0005000 0.0000727   742.9048971 -0.0001571 0.2500
 2330:  32  0 32  1 33  0 33  0               742.9047400   742.9048966 -0.0001566 -0.0005000 0.0000727   742.9048971 -0.0001571 0.2500
 2331:  32  1 32  1 33  1 33  0               742.9047400   742.9048976 -0.0001576 -0.0005000 0.0000727   742.9048971 -0.0001571 0.2500
 2332:  31  2 30  1 32  2 31  0               742.9089900   742.9090440 -0.0000540 -0.0005000 0.0000389   742.9090685 -0.0000785 0.1667
 2333:  30  2 28  1 31  2 29  0               742.9089900   742.9090992 -0.0001092 -0.0005000 0.0000389   742.9090685 -0.0000785 0.1667
 2334:  31  1 30  1 32  2 31  0               742.9089900   742.9087990  0.0001910 -0.0005000 0.0000389   742.9090685 -0.0000785 0.1667
 2335:  31  1 30  1 32  1 31  0               742.9089900   742.9089592  0.0000308 -0.0005000 0.0000389   742.9090685 -0.0000785 0.1667
 2336:  31  2 30  1 32  1 31  0               742.9089900   742.9092042 -0.0002142 -0.0005000 0.0000389   742.9090685 -0.0000785 0.1667
 2337:  28  6 22  1 29  6 23  0               742.9089900   742.9093053 -0.0003153 -0.0005000 0.0000389   742.9090685 -0.0000785 0.1667
 2338:  29 15 14  1 30 15 15  0               742.9147200   742.9155595 -0.0008395 -0.0005000 0.0000536   742.9155595 -0.0008395 0.5000
 2339:  29 15 15  1 30 15 16  0               742.9147200   742.9155595 -0.0008395 -0.0005000 0.0000536   742.9155595 -0.0008395 0.5000
 2340:  29  4 26  1 30  4 27  0               742.9198700   742.9202278 -0.0003578 -0.0005000 0.0000312
 2341:  29 18 11  1 30 18 12  0               742.9390800   742.9392267 -0.0001467 -0.0005000 0.0000697   742.9392267 -0.0001467 0.5000
 2342:  29 18 12  1 30 18 13  0               742.9390800   742.9392267 -0.0001467 -0.0005000 0.0000697   742.9392267 -0.0001467 0.5000
 2343:  29 19 11  1 30 19 12  0               742.9470800   742.9475042 -0.0004242 -0.0005000 0.0000753   742.9475042 -0.0004242 0.5000
 2344:  29 19 10  1 30 19 11  0               742.9470800   742.9475042 -0.0004242 -0.0005000 0.0000753   742.9475042 -0.0004242 0.5000
 2345:  28  5 24  1 29  5 25  0               742.9677700   742.9682551 -0.0004851 -0.0005000 0.0000322
 2346:  13  4 10  1 14  5  9  0               742.9730400   742.9720952  0.0009448 -0.0005000 0.0000277   742.9726000  0.0004400 0.5000
 2347:  27  5 22  1 28  5 23  0               742.9730400   742.9731048 -0.0000648 -0.0005000 0.0000277   742.9726000  0.0004400 0.5000
 2348:  28  9 20  1 29  9 21  0               742.9909600   742.9909229  0.0000371 -0.0005000 0.0000282   742.9912212 -0.0002612 0.3333
 2349:  28  9 19  1 29  9 20  0               742.9909600   742.9908963  0.0000637 -0.0005000 0.0000282   742.9912212 -0.0002612 0.3333
 2350:  28  3 25  1 29  3 26  0               742.9909600   742.9918444 -0.0008844 -0.0005000 0.0000282   742.9912212 -0.0002612 0.3333
 2351:  12  8  5  1 12  9  4  0               743.0079600   743.0077405  0.0002195 -0.0005000 0.0000248   743.0078675  0.0000925 0.1250
 2352:  14  8  7  1 14  9  6  0               743.0079600   743.0081278 -0.0001678 -0.0005000 0.0000248   743.0078675  0.0000925 0.1250
 2353:  11  8  3  1 11  9  2  0               743.0079600   743.0077430  0.0002170 -0.0005000 0.0000248   743.0078675  0.0000925 0.1250
 2354:  11  8  4  1 11  9  3  0               743.0079600   743.0077430  0.0002170 -0.0005000 0.0000248   743.0078675  0.0000925 0.1250
 2355:  14  8  6  1 14  9  5  0               743.0079600   743.0081278 -0.0001678 -0.0005000 0.0000248   743.0078675  0.0000925 0.1250
 2356:  13  8  5  1 13  9  4  0               743.0079600   743.0078589  0.0001011 -0.0005000 0.0000248   743.0078675  0.0000925 0.1250
 2357:  13  8  6  1 13  9  5  0               743.0079600   743.0078589  0.0001011 -0.0005000 0.0000248   743.0078675  0.0000925 0.1250
 2358:  12  8  4  1 12  9  3  0               743.0079600   743.0077405  0.0002195 -0.0005000 0.0000248   743.0078675  0.0000925 0.1250
 2359:  16  8  9  1 16  9  8  0               743.0092200   743.0092468 -0.0000268 -0.0005000 0.0000218   743.0093315 -0.0001115 0.1667
 2360:  17  8 10  1 17  9  9  0               743.0092200   743.0101685 -0.0009485 -0.0005000 0.0000218   743.0093315 -0.0001115 0.1667
 2361:  15  8  8  1 15  9  7  0               743.0092200   743.0085789  0.0006411 -0.0005000 0.0000218   743.0093315 -0.0001115 0.1667
 2362:  17  8  9  1 17  9  8  0               743.0092200   743.0101687 -0.0009487 -0.0005000 0.0000218   743.0093315 -0.0001115 0.1667
 2363:  15  8  7  1 15  9  6  0               743.0092200   743.0085790  0.0006410 -0.0005000 0.0000218   743.0093315 -0.0001115 0.1667
 2364:  16  8  8  1 16  9  7  0               743.0092200   743.0092469 -0.0000269 -0.0005000 0.0000218   743.0093315 -0.0001115 0.1667
 2365:  18  8 11  1 18  9 10  0               743.0116800   743.0113841  0.0002959 -0.0005000 0.0000194   743.0111596  0.0005204 0.3333
 2366:  29  2 27  1 30  3 28  0               743.0116800   743.0107103  0.0009697 -0.0005000 0.0000194   743.0111596  0.0005204 0.3333
 2367:  18  8 10  1 18  9  9  0               743.0116800   743.0113846  0.0002954 -0.0005000 0.0000194   743.0111596  0.0005204 0.3333
 2368:  31  1 31  1 32  0 32  0               743.0160100   743.0161143 -0.0001043 -0.0005000 0.0000712   743.0161107 -0.0001007 0.2500
 2369:  31  1 31  1 32  1 32  0               743.0160100   743.0161116 -0.0001016 -0.0005000 0.0000712   743.0161107 -0.0001007 0.2500
 2370:  31  0 31  1 32  1 32  0               743.0160100   743.0161071 -0.0000971 -0.0005000 0.0000712   743.0161107 -0.0001007 0.2500
 2371:  31  0 31  1 32  0 32  0               743.0160100   743.0161099 -0.0000999 -0.0005000 0.0000712   743.0161107 -0.0001007 0.2500
 2372:  22  8 14  1 22  9 13  0               743.0199700   743.0201021 -0.0001321 -0.0005000 0.0000295   743.0198712  0.0000988 0.1111
 2373:  29  2 27  1 30  2 28  0               743.0199700   743.0190899  0.0008801 -0.0005000 0.0000295   743.0198712  0.0000988 0.1111
 2374:  30  1 29  1 31  2 30  0               743.0199700   743.0197091  0.0002609 -0.0005000 0.0000295   743.0198712  0.0000988 0.1111
 2375:  30  1 29  1 31  1 30  0               743.0199700   743.0199536  0.0000164 -0.0005000 0.0000295   743.0198712  0.0000988 0.1111
 2376:  29  4 26  1 30  3 27  0               743.0199700   743.0190309  0.0009391 -0.0005000 0.0000295   743.0198712  0.0000988 0.1111
 2377:  22  8 15  1 22  9 14  0               743.0199700   743.0200891 -0.0001191 -0.0005000 0.0000295   743.0198712  0.0000988 0.1111
 2378:  30  2 29  1 31  2 30  0               743.0199700   743.0200819 -0.0001119 -0.0005000 0.0000295   743.0198712  0.0000988 0.1111
 2379:  25  3 22  1 26  4 23  0               743.0199700   743.0204578 -0.0004878 -0.0005000 0.0000295   743.0198712  0.0000988 0.1111
 2380:  30  2 29  1 31  1 30  0               743.0199700   743.0203264 -0.0003564 -0.0005000 0.0000295   743.0198712  0.0000988 0.1111
 2381:  15  3 13  1 16  4 12  0               743.0343700   743.0341904  0.0001796 -0.0005000 0.0000270   743.0340236  0.0003464 0.2500
 2382:  28 14 14  1 29 14 15  0               743.0343700   743.0338585  0.0005115 -0.0005000 0.0000270   743.0340236  0.0003464 0.2500
 2383:  28 14 15  1 29 14 16  0               743.0343700   743.0338585  0.0005115 -0.0005000 0.0000270   743.0340236  0.0003464 0.2500
 2384:  28  4 25  1 29  4 26  0               743.0343700   743.0341868  0.0001832 -0.0005000 0.0000270   743.0340236  0.0003464 0.2500
 2385:   9  5  4  1 10  6  5  0               743.0398500   743.0399155 -0.0000655 -0.0005000 0.0000205   743.0399097 -0.0000597 0.5000
 2386:   9  5  5  1 10  6  4  0               743.0398500   743.0399039 -0.0000539 -0.0005000 0.0000205   743.0399097 -0.0000597 0.5000
 2387:  27  8 19  1 27  9 18  0               743.0443700   743.0440318  0.0003382 -0.0005000 0.0000279   743.0438629  0.0005071 0.5000
 2388:  27  8 20  1 27  9 19  0               743.0443700   743.0436941  0.0006759 -0.0005000 0.0000279   743.0438629  0.0005071 0.5000
 2389:  29 29  0  1 30 29  1  0               743.0486900   743.0476652  0.0010248 -0.0005000 0.0001095   743.0484600  0.0002300 0.2000
 2390:  29 29  1  1 30 29  2  0               743.0486900   743.0476652  0.0010248 -0.0005000 0.0001095   743.0484600  0.0002300 0.2000
 2391:  28 16 13  1 29 16 14  0               743.0486900   743.0489885 -0.0002985 -0.0005000 0.0001095   743.0484600  0.0002300 0.2000
 2392:  27  6 21  1 28  6 22  0               743.0486900   743.0489927 -0.0003027 -0.0005000 0.0001095   743.0484600  0.0002300 0.2000
 2393:  28 16 12  1 29 16 13  0               743.0486900   743.0489885 -0.0002985 -0.0005000 0.0001095   743.0484600  0.0002300 0.2000
 2394:  27  7 20  1 28  7 21  0               743.0886600   743.0886142  0.0000458 -0.0005000 0.0000292
 2395:  27  5 23  1 28  5 24  0               743.0904000   743.0905418 -0.0001418 -0.0005000 0.0000313
 2396:  26  4 22  1 27  4 23  0               743.0929000   743.0928384  0.0000616 -0.0005000 0.0000372   743.0925442  0.0003558 0.5000
 2397:  27  7 21  1 28  7 22  0               743.0929000   743.0922500  0.0006500 -0.0005000 0.0000372   743.0925442  0.0003558 0.5000
 2398:  27  8 20  1 28  8 21  0               743.1068400   743.1069645 -0.0001245 -0.0005000 0.0000279   743.1068280  0.0000120 0.5000
 2399:  27  8 19  1 28  8 20  0               743.1068400   743.1066916  0.0001484 -0.0005000 0.0000279   743.1068280  0.0000120 0.5000
 2400:  30  1 30  1 31  0 31  0               743.1271400   743.1272664 -0.0001264 -0.0005000 0.0000694   743.1272607 -0.0001207 0.2500
 2401:  30  0 30  1 31  1 31  0               743.1271400   743.1272550 -0.0001150 -0.0005000 0.0000694   743.1272607 -0.0001207 0.2500
 2402:  30  1 30  1 31  1 31  0               743.1271400   743.1272620 -0.0001220 -0.0005000 0.0000694   743.1272607 -0.0001207 0.2500
 2403:  30  0 30  1 31  0 31  0               743.1271400   743.1272594 -0.0001194 -0.0005000 0.0000694   743.1272607 -0.0001207 0.2500
 2404:  27 10 17  1 28 10 18  0               743.1290100   743.1285578  0.0004522 -0.0005000 0.0000261   743.1286198  0.0003902 0.3333
 2405:  27 10 18  1 28 10 19  0               743.1290100   743.1285584  0.0004516 -0.0005000 0.0000261   743.1286198  0.0003902 0.3333
 2406:  28  2 26  1 29  2 27  0               743.1290100   743.1287431  0.0002669 -0.0005000 0.0000261   743.1286198  0.0003902 0.3333
 2407:  29  1 28  1 30  1 29  0               743.1313900   743.1308659  0.0005241 -0.0005000 0.0000464   743.1309625  0.0004275 0.2500
 2408:  29  2 28  1 30  1 29  0               743.1313900   743.1314311 -0.0000411 -0.0005000 0.0000464   743.1309625  0.0004275 0.2500
 2409:  29  2 28  1 30  2 29  0               743.1313900   743.1310590  0.0003310 -0.0005000 0.0000464   743.1309625  0.0004275 0.2500
 2410:  29  1 28  1 30  2 29  0               743.1313900   743.1304938  0.0008962 -0.0005000 0.0000464   743.1309625  0.0004275 0.2500
 2411:  28  3 26  1 29  3 27  0               743.1341800   743.1339726  0.0002074 -0.0005000 0.0000329
 2412:  28 26  3  1 29 26  4  0               743.1387000   743.1390252 -0.0003252 -0.0005000 0.0001712   743.1390252 -0.0003252 0.5000
 2413:  28 26  2  1 29 26  3  0               743.1387000   743.1390252 -0.0003252 -0.0005000 0.0001712   743.1390252 -0.0003252 0.5000
 2414:  27  4 24  1 28  4 25  0               743.1486900   743.1489411 -0.0002511 -0.0005000 0.0000290
 2415:  20  3 17  1 21  4 18  0               743.1581500   743.1590159 -0.0008659 -0.0005000 0.0000350
 2416:  27 16 12  1 28 16 13  0               743.1742900   743.1745399 -0.0002499 -0.0005000 0.0000606   743.1745399 -0.0002499 0.5000
 2417:  27 16 11  1 28 16 12  0               743.1742900   743.1745399 -0.0002499 -0.0005000 0.0000606   743.1745399 -0.0002499 0.5000
 2418:  19  3 16  1 20  4 17  0               743.1860000   743.1852582  0.0007418 -0.0005000 0.0000316   743.1859349  0.0000651 0.5000
 2419:  26  6 20  1 27  6 21  0               743.1860000   743.1866117 -0.0006117 -0.0005000 0.0000316   743.1859349  0.0000651 0.5000
 2420:  26  3 23  1 27  3 24  0               743.2024900   743.2021466  0.0003434 -0.0005000 0.0000344
 2421:  26  6 21  1 27  6 22  0               743.2079500   743.2083752 -0.0004252 -0.0005000 0.0000294
 2422:  26  5 22  1 27  5 23  0               743.2136800   743.2139491 -0.0002691 -0.0005000 0.0000302
 2423:  25  4 21  1 26  4 22  0               743.2189800   743.2187890  0.0001910 -0.0005000 0.0000357   743.2191155 -0.0001355 0.5000
 2424:  26  7 19  1 27  7 20  0               743.2189800   743.2194420 -0.0004620 -0.0005000 0.0000357   743.2191155 -0.0001355 0.5000
 2425:  26  8 18  1 27  8 19  0               743.2353100   743.2353102 -0.0000002 -0.0005000 0.0000267   743.2353896 -0.0000796 0.5000
 2426:  26  8 19  1 27  8 20  0               743.2353100   743.2354690 -0.0001590 -0.0005000 0.0000267   743.2353896 -0.0000796 0.5000
 2427:  29  0 29  1 30  1 30  0               743.2383300   743.2383379 -0.0000079 -0.0005000 0.0000577   743.2382742  0.0000558 0.2000
 2428:  29  0 29  1 30  0 30  0               743.2383300   743.2383449 -0.0000149 -0.0005000 0.0000577   743.2382742  0.0000558 0.2000
 2429:  27  2 25  1 28  2 26  0               743.2383300   743.2379831  0.0003469 -0.0005000 0.0000577   743.2382742  0.0000558 0.2000
 2430:  29  1 29  1 30  1 30  0               743.2383300   743.2383490 -0.0000190 -0.0005000 0.0000577   743.2382742  0.0000558 0.2000
 2431:  29  1 29  1 30  0 30  0               743.2383300   743.2383560 -0.0000260 -0.0005000 0.0000577   743.2382742  0.0000558 0.2000
 2432:  28  2 27  1 29  2 28  0               743.2414600   743.2419791 -0.0005191 -0.0005000 0.0000444   743.2415980 -0.0001380 0.3333
 2433:  28  1 27  1 29  2 28  0               743.2414600   743.2411253  0.0003347 -0.0005000 0.0000444   743.2415980 -0.0001380 0.3333
 2434:  28  1 27  1 29  1 28  0               743.2414600   743.2416895 -0.0002295 -0.0005000 0.0000444   743.2415980 -0.0001380 0.3333
 2435:  26  9 17  1 27  9 18  0               743.2465200   743.2464180  0.0001020 -0.0005000 0.0000276   743.2464218  0.0000982 0.5000
 2436:  26  9 18  1 27  9 19  0               743.2465200   743.2464257  0.0000943 -0.0005000 0.0000276   743.2464218  0.0000982 0.5000
 2437:  27  3 25  1 28  2 26  0               743.2631600   743.2625512  0.0006088 -0.0005000 0.0000267   743.2632283 -0.0000683 0.3333
 2438:  26 11 15  1 27 11 16  0               743.2631600   743.2635669 -0.0004069 -0.0005000 0.0000267   743.2632283 -0.0000683 0.3333
 2439:  26 11 16  1 27 11 17  0               743.2631600   743.2635669 -0.0004069 -0.0005000 0.0000267   743.2632283 -0.0000683 0.3333
 2440:  26 13 13  1 27 13 14  0               743.2790200   743.2782797  0.0007403 -0.0005000 0.0000437   743.2782797  0.0007403 0.5000
 2441:  26 13 14  1 27 13 15  0               743.2790200   743.2782797  0.0007403 -0.0005000 0.0000437   743.2782797  0.0007403 0.5000
 2442:  25  3 22  1 26  3 23  0               743.3088600   743.3086361  0.0002239 -0.0005000 0.0000355
 2443:  26  2 24  1 27  3 25  0               743.3221500   743.3221947 -0.0000447 -0.0005000 0.0000255   743.3222410 -0.0000910 0.5000
 2444:  25  6 19  1 26  6 20  0               743.3221500   743.3222874 -0.0001374 -0.0005000 0.0000255   743.3222410 -0.0000910 0.5000
 2445:  25  6 20  1 26  6 21  0               743.3378700   743.3373978  0.0004722 -0.0005000 0.0000283   743.3378946 -0.0000246 0.5000
 2446:  25  5 21  1 26  5 22  0               743.3378700   743.3383913 -0.0005213 -0.0005000 0.0000283   743.3378946 -0.0000246 0.5000
 2447:  28  0 28  1 29  0 29  0               743.3492600   743.3493660 -0.0001060 -0.0005000 0.0000475   743.3493844 -0.0001244 0.1429
 2448:  28  1 28  1 29  0 29  0               743.3492600   743.3493835 -0.0001235 -0.0005000 0.0000475   743.3493844 -0.0001244 0.1429
 2449:  25  7 18  1 26  7 19  0               743.3492600   743.3494878 -0.0002278 -0.0005000 0.0000475   743.3493844 -0.0001244 0.1429
 2450:  28  1 28  1 29  1 29  0               743.3492600   743.3493725 -0.0001125 -0.0005000 0.0000475   743.3493844 -0.0001244 0.1429
 2451:  28  0 28  1 29  1 29  0               743.3492600   743.3493550 -0.0000950 -0.0005000 0.0000475   743.3493844 -0.0001244 0.1429
 2452:  26 22  4  1 27 22  5  0               743.3492600   743.3493630 -0.0001030 -0.0005000 0.0000475   743.3493844 -0.0001244 0.1429
 2453:  26 22  5  1 27 22  6  0               743.3492600   743.3493630 -0.0001030 -0.0005000 0.0000475   743.3493844 -0.0001244 0.1429
 2454:  27  2 26  1 28  2 27  0               743.3529000   743.3528476  0.0000524 -0.0005000 0.0000422   743.3529876 -0.0000876 0.3333
 2455:  27  1 26  1 28  1 27  0               743.3529000   743.3524154  0.0004846 -0.0005000 0.0000422   743.3529876 -0.0000876 0.3333
 2456:  27  2 26  1 28  1 27  0               743.3529000   743.3536999 -0.0007999 -0.0005000 0.0000422   743.3529876 -0.0000876 0.3333
 2457:  26  3 24  1 27  3 25  0               743.3566200   743.3567770 -0.0001570 -0.0005000 0.0000290
 2458:  25  8 18  1 26  8 19  0               743.3633100   743.3636138 -0.0003038 -0.0005000 0.0000256   743.3635687 -0.0002587 0.5000
 2459:  25  8 17  1 26  8 18  0               743.3633100   743.3635236 -0.0002136 -0.0005000 0.0000256   743.3635687 -0.0002587 0.5000
 2460:  25  9 17  1 26  9 18  0               743.3736500   743.3737315 -0.0000815 -0.0005000 0.0000268   743.3737295 -0.0000795 0.5000
 2461:  25  9 16  1 26  9 17  0               743.3736500   743.3737274 -0.0000774 -0.0005000 0.0000268   743.3737295 -0.0000795 0.5000
 2462:  25  4 22  1 26  4 23  0               743.3809800   743.3812507 -0.0002707 -0.0005000 0.0000266   743.3812791 -0.0002991 0.5000
 2463:  26  3 24  1 27  2 25  0               743.3809800   743.3813075 -0.0003275 -0.0005000 0.0000266   743.3812791 -0.0002991 0.5000
 2464:  25 10 15  1 26 10 16  0               743.3825700   743.3822393  0.0003307 -0.0005000 0.0000296   743.3822394  0.0003306 0.5000
 2465:  25 10 16  1 26 10 17  0               743.3825700   743.3822395  0.0003305 -0.0005000 0.0000296   743.3822394  0.0003306 0.5000
 2466:  25 11 15  1 26 11 16  0               743.3905700   743.3898671  0.0007029 -0.0005000 0.0000335   743.3898671  0.0007029 0.5000
 2467:  25 11 14  1 26 11 15  0               743.3905700   743.3898671  0.0007029 -0.0005000 0.0000335   743.3898671  0.0007029 0.5000
 2468:  24  5 19  1 25  5 20  0               743.3994600   743.3997558 -0.0002958 -0.0005000 0.0000348
 2469:   6  5  2  1  7  6  1  0               743.4100400   743.4098500  0.0001900 -0.0005000 0.0000229   743.4098501  0.0001899 0.5000
 2470:   6  5  1  1  7  6  2  0               743.4100400   743.4098501  0.0001899 -0.0005000 0.0000229   743.4098501  0.0001899 0.5000
 2471:  25 15 11  1 26 15 12  0               743.4176800   743.4180469 -0.0003669 -0.0005000 0.0000376   743.4177282 -0.0000482 0.3333
 2472:  25 15 10  1 26 15 11  0               743.4176800   743.4180469 -0.0003669 -0.0005000 0.0000376   743.4177282 -0.0000482 0.3333
 2473:  24  3 21  1 25  3 22  0               743.4176800   743.4170909  0.0005891 -0.0005000 0.0000376   743.4177282 -0.0000482 0.3333
 2474:  13  7  7  1 13  8  6  0               743.4288000   743.4297309 -0.0009309 -0.0005000 0.0000211   743.4294782 -0.0006782 0.2500
 2475:  12  7  5  1 12  8  4  0               743.4288000   743.4292254 -0.0004254 -0.0005000 0.0000211   743.4294782 -0.0006782 0.2500
 2476:  12  7  6  1 12  8  5  0               743.4288000   743.4292254 -0.0004254 -0.0005000 0.0000211   743.4294782 -0.0006782 0.2500
 2477:  13  7  6  1 13  8  5  0               743.4288000   743.4297311 -0.0009311 -0.0005000 0.0000211   743.4294782 -0.0006782 0.2500
 2478:  17  7 10  1 17  8  9  0               743.4344700   743.4347384 -0.0002684 -0.0005000 0.0000186   743.4347338 -0.0002638 0.5000
 2479:  17  7 11  1 17  8 10  0               743.4344700   743.4347293 -0.0002593 -0.0005000 0.0000186   743.4347338 -0.0002638 0.5000
 2480:  27  1 27  1 28  0 28  0               743.4603600   743.4603501  0.0000099 -0.0005000 0.0000626   743.4603275  0.0000325 0.2500
 2481:  27  0 27  1 28  0 28  0               743.4603600   743.4603225  0.0000375 -0.0005000 0.0000626   743.4603275  0.0000325 0.2500
 2482:  27  1 27  1 28  1 28  0               743.4603600   743.4603326  0.0000274 -0.0005000 0.0000626   743.4603275  0.0000325 0.2500
 2483:  27  0 27  1 28  1 28  0               743.4603600   743.4603050  0.0000550 -0.0005000 0.0000626   743.4603275  0.0000325 0.2500
 2484:  26  1 25  1 27  1 26  0               743.4635300   743.4630309  0.0004991 -0.0005000 0.0000213   743.4635272  0.0000028 0.2000
 2485:  24  7 18  1 24  8 17  0               743.4635300   743.4640560 -0.0005260 -0.0005000 0.0000213   743.4635272  0.0000028 0.2000
 2486:  26  2 25  1 27  2 26  0               743.4635300   743.4636724 -0.0001424 -0.0005000 0.0000213   743.4635272  0.0000028 0.2000
 2487:  24  5 20  1 25  5 21  0               743.4635300   743.4637555 -0.0002255 -0.0005000 0.0000213   743.4635272  0.0000028 0.2000
 2488:   9  4  5  1 10  5  6  0               743.4635300   743.4631211  0.0004089 -0.0005000 0.0000213   743.4635272  0.0000028 0.2000
 2489:  24  7 17  1 25  7 18  0               743.4793700   743.4788632  0.0005068 -0.0005000 0.0000255   743.4794753 -0.0001053 0.3333
 2490:  26  7 20  1 26  8 19  0               743.4793700   743.4798221 -0.0004521 -0.0005000 0.0000255   743.4794753 -0.0001053 0.3333
 2491:  24  7 18  1 25  7 19  0               743.4793700   743.4797407 -0.0003707 -0.0005000 0.0000255   743.4794753 -0.0001053 0.3333
 2492:  23  4 19  1 24  4 20  0               743.4811800   743.4808986  0.0002814 -0.0005000 0.0000416
 2493:  26  4 23  1 27  3 24  0               743.4914500   743.4907007  0.0007493 -0.0005000 0.0000240   743.4911573  0.0002927 0.3333
 2494:  24  8 17  1 25  8 18  0               743.4914500   743.4914106  0.0000394 -0.0005000 0.0000240   743.4911573  0.0002927 0.3333
 2495:  24  8 16  1 25  8 17  0               743.4914500   743.4913607  0.0000893 -0.0005000 0.0000240   743.4911573  0.0002927 0.3333
 2496:  24  4 21  1 25  4 22  0               743.4985500   743.4989717 -0.0004217 -0.0005000 0.0000215   743.4986128 -0.0000628 0.5000
 2497:  13  3 10  1 14  4 11  0               743.4985500   743.4982540  0.0002960 -0.0005000 0.0000215   743.4986128 -0.0000628 0.5000
 2498:  24  9 15  1 25  9 16  0               743.5007000   743.5007536 -0.0000536 -0.0005000 0.0000260   743.5007546 -0.0000546 0.5000
 2499:  24  9 16  1 25  9 17  0               743.5007000   743.5007556 -0.0000556 -0.0005000 0.0000260   743.5007546 -0.0000546 0.5000
 2500:  24 10 14  1 25 10 15  0               743.5088500   743.5087263  0.0001237 -0.0005000 0.0000270   743.5085933  0.0002567 0.3333
 2501:  24 10 15  1 25 10 16  0               743.5088500   743.5087264  0.0001236 -0.0005000 0.0000270   743.5085933  0.0002567 0.3333
 2502:  28  7 21  1 28  8 20  0               743.5088500   743.5083271  0.0005229 -0.0005000 0.0000270   743.5085933  0.0002567 0.3333
 2503:  24 13 11  1 25 13 12  0               743.5287600   743.5296251 -0.0008651 -0.0005000 0.0000314   743.5291631 -0.0004031 0.3333
 2504:  23  3 20  1 24  3 21  0               743.5287600   743.5282390  0.0005210 -0.0005000 0.0000314   743.5291631 -0.0004031 0.3333
 2505:  24 13 12  1 25 13 13  0               743.5287600   743.5296251 -0.0008651 -0.0005000 0.0000314   743.5291631 -0.0004031 0.3333
 2506:  23  5 18  1 24  5 19  0               743.5408300   743.5409406 -0.0001106 -0.0005000 0.0000313
 2507:  26  0 26  1 27  1 27  0               743.5711600   743.5711862 -0.0000262 -0.0005000 0.0000550   743.5712969 -0.0001369 0.2000
 2508:  26  1 26  1 27  0 27  0               743.5711600   743.5712570 -0.0000970 -0.0005000 0.0000550   743.5712969 -0.0001369 0.2000
 2509:  25  1 24  1 26  2 25  0               743.5711600   743.5715978 -0.0004378 -0.0005000 0.0000550   743.5712969 -0.0001369 0.2000
 2510:  26  0 26  1 27  0 27  0               743.5711600   743.5712137 -0.0000537 -0.0005000 0.0000550   743.5712969 -0.0001369 0.2000
 2511:  26  1 26  1 27  1 27  0               743.5711600   743.5712295 -0.0000695 -0.0005000 0.0000550   743.5712969 -0.0001369 0.2000
 2512:  24 19  5  1 25 19  6  0               743.5738800   743.5733487  0.0005313 -0.0005000 0.0000459   743.5736703  0.0002097 0.2500
 2513:  24 19  6  1 25 19  7  0               743.5738800   743.5733487  0.0005313 -0.0005000 0.0000459   743.5736703  0.0002097 0.2500
 2514:  25  1 24  1 26  1 25  0               743.5738800   743.5735185  0.0003615 -0.0005000 0.0000459   743.5736703  0.0002097 0.2500
 2515:  25  2 24  1 26  2 25  0               743.5738800   743.5744653 -0.0005853 -0.0005000 0.0000459   743.5736703  0.0002097 0.2500
 2516:  24  3 22  1 25  3 23  0               743.5805900   743.5807086 -0.0001186 -0.0005000 0.0000256
 2517:  23  6 17  1 24  6 18  0               743.5888800   743.5886986  0.0001814 -0.0005000 0.0000250
 2518:  23  6 18  1 24  6 19  0               743.5952700   743.5954425 -0.0001725 -0.0005000 0.0000245
 2519:  24 23  1  1 25 23  2  0               743.6076800   743.6084285 -0.0007485 -0.0005000 0.0000706   743.6081721 -0.0004921 0.2500
 2520:  23  7 16  1 24  7 17  0               743.6076800   743.6076555  0.0000245 -0.0005000 0.0000706   743.6081721 -0.0004921 0.2500
 2521:  24 23  2  1 25 23  3  0               743.6076800   743.6084285 -0.0007485 -0.0005000 0.0000706   743.6081721 -0.0004921 0.2500
 2522:  23  7 17  1 24  7 18  0               743.6076800   743.6081758 -0.0004958 -0.0005000 0.0000706   743.6081721 -0.0004921 0.2500
 2523:  24 24  1  1 25 24  2  0               743.6178100   743.6180959 -0.0002859 -0.0005000 0.0001040   743.6179998 -0.0001898 0.3333
 2524:  23  4 20  1 24  4 21  0               743.6178100   743.6178076  0.0000024 -0.0005000 0.0001040   743.6179998 -0.0001898 0.3333
 2525:  24 24  0  1 25 24  1  0               743.6178100   743.6180959 -0.0002859 -0.0005000 0.0001040   743.6179998 -0.0001898 0.3333
 2526:  23  9 14  1 24  9 15  0               743.6276000   743.6275081  0.0000919 -0.0005000 0.0000254   743.6275086  0.0000914 0.5000
 2527:  23  9 15  1 24  9 16  0               743.6276000   743.6275091  0.0000909 -0.0005000 0.0000254   743.6275086  0.0000914 0.5000
 2528:  22  3 19  1 23  3 20  0               743.6429500   743.6425945  0.0003555 -0.0005000 0.0000368
 2529:  23 14  9  1 24 14 10  0               743.6612800   743.6617029 -0.0004229 -0.0005000 0.0000519   743.6617029 -0.0004229 0.5000
 2530:  23 14 10  1 24 14 11  0               743.6612800   743.6617029 -0.0004229 -0.0005000 0.0000519   743.6617029 -0.0004229 0.5000
 2531:  23  2 21  1 24  2 22  0               743.6693600   743.6692935  0.0000665 -0.0005000 0.0000298   743.6689280  0.0004320 0.2500
 2532:  25  4 22  1 26  3 23  0               743.6693600   743.6694290 -0.0000690 -0.0005000 0.0000298   743.6689280  0.0004320 0.2500
 2533:  23 15  8  1 24 15  9  0               743.6693600   743.6684947  0.0008653 -0.0005000 0.0000298   743.6689280  0.0004320 0.2500
 2534:  23 15  9  1 24 15 10  0               743.6693600   743.6684947  0.0008653 -0.0005000 0.0000298   743.6689280  0.0004320 0.2500
 2535:  22  5 17  1 23  5 18  0               743.6804700   743.6804506  0.0000194 -0.0005000 0.0000281
 2536:  25  1 25  1 26  1 26  0               743.6817800   743.6820636 -0.0002836 -0.0005000 0.0000522   743.6818394 -0.0000594 0.2000
 2537:  25  1 25  1 26  0 26  0               743.6817800   743.6821068 -0.0003268 -0.0005000 0.0000522   743.6818394 -0.0000594 0.2000
 2538:  25  0 25  1 26  0 26  0               743.6817800   743.6820390 -0.0002590 -0.0005000 0.0000522   743.6818394 -0.0000594 0.2000
 2539:  25  0 25  1 26  1 26  0               743.6817800   743.6819958 -0.0002158 -0.0005000 0.0000522   743.6818394 -0.0000594 0.2000
 2540:  24  1 23  1 25  2 24  0               743.6817800   743.6809916  0.0007884 -0.0005000 0.0000522   743.6818394 -0.0000594 0.2000
 2541:  24  1 23  1 25  1 24  0               743.6836700   743.6838544 -0.0001844 -0.0005000 0.0000350
 2542:  22  2 20  1 23  3 21  0               743.6855100   743.6854077  0.0001023 -0.0005000 0.0000260   743.6853251  0.0001849 0.5000
 2543:  24  2 23  1 25  2 24  0               743.6855100   743.6852425  0.0002675 -0.0005000 0.0000260   743.6853251  0.0001849 0.5000
 2544:  23  3 21  1 24  3 22  0               743.6927900   743.6933332 -0.0005432 -0.0005000 0.0000241
 2545:  22  5 18  1 23  5 19  0               743.7165900   743.7166896 -0.0000996 -0.0005000 0.0000246
 2546:  22  6 16  1 23  6 17  0               743.7196800   743.7199123 -0.0002323 -0.0005000 0.0000232
 2547:  23 22  1  1 24 22  2  0               743.7241600   743.7238746  0.0002854 -0.0005000 0.0000860   743.7239981  0.0001619 0.3333
 2548:  23 22  2  1 24 22  3  0               743.7241600   743.7238746  0.0002854 -0.0005000 0.0000860   743.7239981  0.0001619 0.3333
 2549:  22  6 17  1 23  6 18  0               743.7241600   743.7242451 -0.0000851 -0.0005000 0.0000860   743.7239981  0.0001619 0.3333
 2550:  22  7 16  1 23  7 17  0               743.7360700   743.7362329 -0.0001629 -0.0005000 0.0000219   743.7360828 -0.0000128 0.5000
 2551:  22  7 15  1 23  7 16  0               743.7360700   743.7359327  0.0001373 -0.0005000 0.0000219   743.7360828 -0.0000128 0.5000
 2552:  22  4 19  1 23  4 20  0               743.7377200   743.7377755 -0.0000555 -0.0005000 0.0000243
 2553:  10  3  8  1 11  4  7  0               743.7536600   743.7529250  0.0007350 -0.0005000 0.0000201   743.7537435 -0.0000835 0.2500
 2554:  22  9 14  1 23  9 15  0               743.7536600   743.7540028 -0.0003428 -0.0005000 0.0000201   743.7537435 -0.0000835 0.2500
 2555:  22  9 13  1 23  9 14  0               743.7536600   743.7540023 -0.0003423 -0.0005000 0.0000201   743.7537435 -0.0000835 0.2500
 2556:  21  4 17  1 22  4 18  0               743.7536600   743.7540437 -0.0003837 -0.0005000 0.0000201   743.7537435 -0.0000835 0.2500
 2557:  22 10 12  1 23 10 13  0               743.7610600   743.7610338  0.0000262 -0.0005000 0.0000224   743.7608223  0.0002377 0.2500
 2558:  21  3 18  1 22  3 19  0               743.7610600   743.7604111  0.0006489 -0.0005000 0.0000224   743.7608223  0.0002377 0.2500
 2559:  21  2 19  1 22  3 20  0               743.7610600   743.7608106  0.0002494 -0.0005000 0.0000224   743.7608223  0.0002377 0.2500
 2560:  22 10 13  1 23 10 14  0               743.7610600   743.7610338  0.0000262 -0.0005000 0.0000224   743.7608223  0.0002377 0.2500
 2561:  22 11 12  1 23 11 13  0               743.7684600   743.7675977  0.0008623 -0.0005000 0.0000337   743.7675977  0.0008623 0.5000
 2562:  22 11 11  1 23 11 12  0               743.7684600   743.7675977  0.0008623 -0.0005000 0.0000337   743.7675977  0.0008623 0.5000
 2563:  22  2 20  1 23  2 21  0               743.7756500   743.7756552 -0.0000052 -0.0005000 0.0000238
 2564:  24  0 24  1 25  0 25  0               743.7930900   743.7927972  0.0002928 -0.0005000 0.0000381   743.7931903 -0.0001003 0.1429
 2565:  24  1 24  1 25  0 25  0               743.7930900   743.7929032  0.0001868 -0.0005000 0.0000381   743.7931903 -0.0001003 0.1429
 2566:  22 15  8  1 23 15  9  0               743.7930900   743.7935300 -0.0004400 -0.0005000 0.0000381   743.7931903 -0.0001003 0.1429
 2567:  24  0 24  1 25  1 25  0               743.7930900   743.7927295  0.0003605 -0.0005000 0.0000381   743.7931903 -0.0001003 0.1429
 2568:  23  1 22  1 24  1 23  0               743.7930900   743.7940066 -0.0009166 -0.0005000 0.0000381   743.7931903 -0.0001003 0.1429
 2569:  24  1 24  1 25  1 25  0               743.7930900   743.7928355  0.0002545 -0.0005000 0.0000381   743.7931903 -0.0001003 0.1429
 2570:  22 15  7  1 23 15  8  0               743.7930900   743.7935300 -0.0004400 -0.0005000 0.0000381   743.7931903 -0.0001003 0.1429
 2571:  22 16  7  1 23 16  8  0               743.8000300   743.8004468 -0.0004168 -0.0005000 0.0000454   743.8003882 -0.0003582 0.3333
 2572:  22 16  6  1 23 16  7  0               743.8000300   743.8004468 -0.0004168 -0.0005000 0.0000454   743.8003882 -0.0003582 0.3333
 2573:  23  2 22  1 24  1 23  0               743.8000300   743.8002709 -0.0002409 -0.0005000 0.0000454   743.8003882 -0.0003582 0.3333
 2574:  22  3 20  1 23  3 21  0               743.8066400   743.8065409  0.0000991 -0.0005000 0.0000228
 2575:   6  4  2  1  7  5  3  0               743.8316700   743.8315916  0.0000784 -0.0005000 0.0000563   743.8313549  0.0003151 0.2500
 2576:  22 20  3  1 23 20  4  0               743.8316700   743.8311298  0.0005402 -0.0005000 0.0000563   743.8313549  0.0003151 0.2500
 2577:   6  4  3  1  7  5  2  0               743.8316700   743.8315685  0.0001015 -0.0005000 0.0000563   743.8313549  0.0003151 0.2500
 2578:  22 20  2  1 23 20  3  0               743.8316700   743.8311298  0.0005402 -0.0005000 0.0000563   743.8313549  0.0003151 0.2500
 2579:  11  6  5  1 11  7  4  0               743.8503600   743.8510908 -0.0007308 -0.0005000 0.0000184   743.8506697 -0.0003097 0.2000
 2580:  10  6  4  1 10  7  3  0               743.8503600   743.8505433 -0.0001833 -0.0005000 0.0000184   743.8506697 -0.0003097 0.2000
 2581:  21  6 15  1 22  6 16  0               743.8503600   743.8500821  0.0002779 -0.0005000 0.0000184   743.8506697 -0.0003097 0.2000
 2582:  10  6  5  1 10  7  4  0               743.8503600   743.8505428 -0.0001828 -0.0005000 0.0000184   743.8506697 -0.0003097 0.2000
 2583:  11  6  6  1 11  7  5  0               743.8503600   743.8510894 -0.0007294 -0.0005000 0.0000184   743.8506697 -0.0003097 0.2000
 2584:  21  6 16  1 22  6 17  0               743.8526300   743.8527911 -0.0001611 -0.0005000 0.0000177   743.8525732  0.0000568 0.2000
 2585:  12  6  7  1 12  7  6  0               743.8526300   743.8519230  0.0007070 -0.0005000 0.0000177   743.8525732  0.0000568 0.2000
 2586:  13  6  7  1 13  7  6  0               743.8526300   743.8531181 -0.0004881 -0.0005000 0.0000177   743.8525732  0.0000568 0.2000
 2587:  13  6  8  1 13  7  7  0               743.8526300   743.8531064 -0.0004764 -0.0005000 0.0000177   743.8525732  0.0000568 0.2000
 2588:  12  6  6  1 12  7  5  0               743.8526300   743.8519273  0.0007027 -0.0005000 0.0000177   743.8525732  0.0000568 0.2000
 2589:  24  4 21  1 25  3 22  0               743.8589800   743.8593079 -0.0003279 -0.0005000 0.0000191   743.8593074 -0.0003274 0.2500
 2590:  16  6 10  1 16  7  9  0               743.8589800   743.8596035 -0.0006235 -0.0005000 0.0000191   743.8593074 -0.0003274 0.2500
 2591:  16  6 11  1 16  7 10  0               743.8589800   743.8594576 -0.0004776 -0.0005000 0.0000191   743.8593074 -0.0003274 0.2500
 2592:  21  4 18  1 22  4 19  0               743.8589800   743.8588608  0.0001192 -0.0005000 0.0000191   743.8593074 -0.0003274 0.2500
 2593:  17  6 11  1 17  7 10  0               743.8639700   743.8630609  0.0009091 -0.0005000 0.0000194   743.8635749  0.0003951 0.3333
 2594:  21  7 15  1 22  7 16  0               743.8639700   743.8639160  0.0000540 -0.0005000 0.0000194   743.8635749  0.0003951 0.3333
 2595:  21  7 14  1 22  7 15  0               743.8639700   743.8637478  0.0002222 -0.0005000 0.0000194   743.8635749  0.0003951 0.3333
 2596:  21  8 13  1 22  8 14  0               743.8728200   743.8728354 -0.0000154 -0.0005000 0.0000205   743.8727972  0.0000228 0.3333
 2597:  21  8 14  1 22  8 15  0               743.8728200   743.8728425 -0.0000225 -0.0005000 0.0000205   743.8727972  0.0000228 0.3333
 2598:  19  6 13  1 19  7 12  0               743.8728200   743.8727138  0.0001062 -0.0005000 0.0000205   743.8727972  0.0000228 0.3333
 2599:  21  2 19  1 22  2 20  0               743.8815600   743.8817783 -0.0002183 -0.0005000 0.0000282   743.8817445 -0.0001845 0.5000
 2600:  20  3 17  1 21  3 18  0               743.8815600   743.8817107 -0.0001507 -0.0005000 0.0000282   743.8817445 -0.0001845 0.5000
 2601:  21 10 11  1 22 10 12  0               743.8875800   743.8868697  0.0007103 -0.0005000 0.0000240   743.8870375  0.0005425 0.3333
 2602:  21  6 15  1 21  7 14  0               743.8875800   743.8873731  0.0002069 -0.0005000 0.0000240   743.8870375  0.0005425 0.3333
 2603:  21 10 12  1 22 10 13  0               743.8875800   743.8868697  0.0007103 -0.0005000 0.0000240   743.8870375  0.0005425 0.3333
 2604:  21 11 10  1 22 11 11  0               743.8940000   743.8931382  0.0008618 -0.0005000 0.0000257   743.8931862  0.0008138 0.3333
 2605:  21 11 11  1 22 11 12  0               743.8940000   743.8931382  0.0008618 -0.0005000 0.0000257   743.8931862  0.0008138 0.3333
 2606:  20  4 16  1 21  4 17  0               743.8940000   743.8932822  0.0007178 -0.0005000 0.0000257   743.8931862  0.0008138 0.3333
 2607:  23  1 23  1 24  0 24  0               743.9036800   743.9036520  0.0000280 -0.0005000 0.0000464   743.9035998  0.0000802 0.2000
 2608:  23  0 23  1 24  1 24  0               743.9036800   743.9033809  0.0002991 -0.0005000 0.0000464   743.9035998  0.0000802 0.2000
 2609:  23  1 23  1 24  1 24  0               743.9036800   743.9035461  0.0001339 -0.0005000 0.0000464   743.9035998  0.0000802 0.2000
 2610:  22  1 21  1 23  1 22  0               743.9036800   743.9039332 -0.0002532 -0.0005000 0.0000464   743.9035998  0.0000802 0.2000
 2611:  23  0 23  1 24  0 24  0               743.9036800   743.9034867  0.0001933 -0.0005000 0.0000464   743.9035998  0.0000802 0.2000
 2612:  21  3 19  1 22  3 20  0               743.9206000   743.9204427  0.0001573 -0.0005000 0.0000217
 2613:  26  6 21  1 26  7 20  0               743.9277100   743.9273975  0.0003125 -0.0005000 0.0000294
 2614:  20  5 15  1 21  5 16  0               743.9532700   743.9535075 -0.0002375 -0.0005000 0.0000300   743.9534027 -0.0001327 0.3333
 2615:  29  6 24  1 29  7 23  0               743.9532700   743.9530343  0.0002357 -0.0005000 0.0000300   743.9534027 -0.0001327 0.3333
 2616:  33  6 28  1 33  7 27  0               743.9532700   743.9536663 -0.0003963 -0.0005000 0.0000300   743.9534027 -0.0001327 0.3333
 2617:  20  5 16  1 21  5 17  0               743.9711600   743.9715131 -0.0003531 -0.0005000 0.0000216
 2618:  20  6 14  1 21  6 15  0               743.9793900   743.9793788  0.0000112 -0.0005000 0.0000202
 2619:  20  4 17  1 21  4 18  0               743.9809500   743.9810166 -0.0000666 -0.0005000 0.0000208   743.9810207 -0.0000707 0.5000
 2620:  20  6 15  1 21  6 16  0               743.9809500   743.9810248 -0.0000748 -0.0005000 0.0000208   743.9810207 -0.0000707 0.5000
 2621:  20  2 18  1 21  2 19  0               743.9884200   743.9881531  0.0002669 -0.0005000 0.0000240
 2622:  17  2 15  1 18  3 16  0               743.9914600   743.9922665 -0.0008065 -0.0005000 0.0000199   743.9915477 -0.0000877 0.3333
 2623:  20  7 13  1 21  7 14  0               743.9914600   743.9911427  0.0003173 -0.0005000 0.0000199   743.9915477 -0.0000877 0.3333
 2624:  20  7 14  1 21  7 15  0               743.9914600   743.9912340  0.0002260 -0.0005000 0.0000199   743.9915477 -0.0000877 0.3333
 2625:  20  8 12  1 21  8 13  0               743.9996400   743.9993749  0.0002651 -0.0005000 0.0000213   743.9993766  0.0002634 0.5000
 2626:  20  8 13  1 21  8 14  0               743.9996400   743.9993784  0.0002616 -0.0005000 0.0000213   743.9993766  0.0002634 0.5000
 2627:  20  9 12  1 21  9 13  0               744.0063900   744.0062512  0.0001388 -0.0005000 0.0000191   744.0061064  0.0002836 0.2500
 2628:  20  9 11  1 21  9 12  0               744.0063900   744.0062511  0.0001389 -0.0005000 0.0000191   744.0061064  0.0002836 0.2500
 2629:  19  3 16  1 20  3 17  0               744.0063900   744.0063534  0.0000366 -0.0005000 0.0000191   744.0061064  0.0002836 0.2500
 2630:   8  3  6  1  9  4  5  0               744.0063900   744.0055700  0.0008200 -0.0005000 0.0000191   744.0061064  0.0002836 0.2500
 2631:  21  1 20  1 22  1 21  0               744.0139300   744.0135817  0.0003483 -0.0005000 0.0000434   744.0140373 -0.0001073 0.2000
 2632:  22  1 22  1 23  1 23  0               744.0139300   744.0141971 -0.0002671 -0.0005000 0.0000434   744.0140373 -0.0001073 0.2000
 2633:  22  0 22  1 23  1 23  0               744.0139300   744.0139403 -0.0000103 -0.0005000 0.0000434   744.0140373 -0.0001073 0.2000
 2634:  22  1 22  1 23  0 23  0               744.0139300   744.0143621 -0.0004321 -0.0005000 0.0000434   744.0140373 -0.0001073 0.2000
 2635:  22  0 22  1 23  0 23  0               744.0139300   744.0141053 -0.0001753 -0.0005000 0.0000434   744.0140373 -0.0001073 0.2000
 2636:  20 11  9  1 21 11 10  0               744.0176600   744.0185036 -0.0008436 -0.0005000 0.0000248   744.0182519 -0.0005919 0.3333
 2637:  21  2 20  1 22  2 21  0               744.0176600   744.0177486 -0.0000886 -0.0005000 0.0000248   744.0182519 -0.0005919 0.3333
 2638:  20 11 10  1 21 11 11  0               744.0176600   744.0185036 -0.0008436 -0.0005000 0.0000248   744.0182519 -0.0005919 0.3333
 2639:  19  4 15  1 20  4 16  0               744.0333400   744.0332033  0.0001367 -0.0005000 0.0000279
 2640:  20  3 18  1 21  3 19  0               744.0350400   744.0351449 -0.0001049 -0.0005000 0.0000208
 2641:  30  3 28  1 30  4 27  0               744.0520000   744.0518642  0.0001358 -0.0005000 0.0000372
 2642:  20 17  3  1 21 17  4  0               744.0571900   744.0570579  0.0001321 -0.0005000 0.0000824   744.0570579  0.0001321 0.5000
 2643:  20 17  4  1 21 17  5  0               744.0571900   744.0570579  0.0001321 -0.0005000 0.0000824   744.0570579  0.0001321 0.5000
 2644:   4  4  0  1  5  5  1  0               744.0773800   744.0781525 -0.0007725 -0.0005000 0.0000234   744.0781522 -0.0007722 0.5000
 2645:   4  4  1  1  5  5  0  0               744.0773800   744.0781520 -0.0007720 -0.0005000 0.0000234   744.0781522 -0.0007722 0.5000
 2646:  19  5 14  1 20  5 15  0               744.0869100   744.0871397 -0.0002297 -0.0005000 0.0000212
 2647:  27  2 26  1 27  3 25  0               744.0954300   744.0951817  0.0002483 -0.0005000 0.0000256   744.0953189  0.0001111 0.5000
 2648:  19  2 17  1 20  2 18  0               744.0954300   744.0954561 -0.0000261 -0.0005000 0.0000256   744.0953189  0.0001111 0.5000
 2649:  19  5 15  1 20  5 16  0               744.0991600   744.0992355 -0.0000755 -0.0005000 0.0000248   744.0992521 -0.0000921 0.5000
 2650:  32  4 29  1 32  5 28  0               744.0991600   744.0992687 -0.0001087 -0.0005000 0.0000248   744.0992521 -0.0000921 0.5000
 2651:  19  4 16  1 20  4 17  0               744.1038900   744.1041651 -0.0002751 -0.0005000 0.0000212
 2652:  20  1 19  1 21  2 20  0               744.1093100   744.1095868 -0.0002768 -0.0005000 0.0000189   744.1092481  0.0000619 0.5000
 2653:  19  6 14  1 20  6 15  0               744.1093100   744.1089094  0.0004006 -0.0005000 0.0000189   744.1092481  0.0000619 0.5000
 2654:  19  7 13  1 20  7 14  0               744.1177500   744.1181990 -0.0004490 -0.0005000 0.0000203   744.1182592 -0.0005092 0.3333
 2655:  27  1 26  1 27  2 25  0               744.1177500   744.1184277 -0.0006777 -0.0005000 0.0000203   744.1182592 -0.0005092 0.3333
 2656:  19  7 12  1 20  7 13  0               744.1177500   744.1181510 -0.0004010 -0.0005000 0.0000203   744.1182592 -0.0005092 0.3333
 2657:  21  1 21  1 22  1 22  0               744.1250200   744.1247909  0.0002291 -0.0005000 0.0000273   744.1249884  0.0000316 0.1429
 2658:  21  1 21  1 22  0 22  0               744.1250200   744.1250472 -0.0000272 -0.0005000 0.0000273   744.1249884  0.0000316 0.1429
 2659:  33  5 29  1 33  6 28  0               744.1250200   744.1247752  0.0002448 -0.0005000 0.0000273   744.1249884  0.0000316 0.1429
 2660:  21  0 21  1 22  1 22  0               744.1250200   744.1243933  0.0006267 -0.0005000 0.0000273   744.1249884  0.0000316 0.1429
 2661:  21  0 21  1 22  0 22  0               744.1250200   744.1246496  0.0003704 -0.0005000 0.0000273   744.1249884  0.0000316 0.1429
 2662:  19  8 12  1 20  8 13  0               744.1250200   744.1256321 -0.0006121 -0.0005000 0.0000273   744.1249884  0.0000316 0.1429
 2663:  19  8 11  1 20  8 12  0               744.1250200   744.1256305 -0.0006105 -0.0005000 0.0000273   744.1249884  0.0000316 0.1429
 2664:  20  2 19  1 21  2 20  0               744.1288200   744.1287784  0.0000416 -0.0005000 0.0000260
 2665:  19  9 10  1 20  9 11  0               744.1318500   744.1320255 -0.0001755 -0.0005000 0.0000246   744.1320255 -0.0001755 0.5000
 2666:  19  9 11  1 20  9 12  0               744.1318500   744.1320255 -0.0001755 -0.0005000 0.0000246   744.1320255 -0.0001755 0.5000
 2667:  18  3 15  1 19  3 16  0               744.1342000   744.1341043  0.0000957 -0.0005000 0.0000314
 2668:  19 10  9  1 20 10 10  0               744.1380500   744.1379431  0.0001069 -0.0005000 0.0000295   744.1379431  0.0001069 0.5000
 2669:  19 10 10  1 20 10 11  0               744.1380500   744.1379431  0.0001069 -0.0005000 0.0000295   744.1379431  0.0001069 0.5000
 2670:  30  2 28  1 30  3 27  0               744.1420000   744.1422743 -0.0002743 -0.0005000 0.0000299   744.1421777 -0.0001777 0.5000
 2671:  20  2 19  1 21  1 20  0               744.1420000   744.1420811 -0.0000811 -0.0005000 0.0000299   744.1421777 -0.0001777 0.5000
 2672:  19  3 17  1 20  3 18  0               744.1508400   744.1507421  0.0000979 -0.0005000 0.0000201
 2673:  18  4 14  1 19  4 15  0               744.1729100   744.1728945  0.0000155 -0.0005000 0.0000249
 2674:  19 18  1  1 20 18  2  0               744.1889100   744.1889577 -0.0000477 -0.0005000 0.0000456   744.1890178 -0.0001078 0.2500
 2675:  31  4 28  1 31  5 27  0               744.1889100   744.1888341  0.0000759 -0.0005000 0.0000456   744.1890178 -0.0001078 0.2500
 2676:  19 18  2  1 20 18  3  0               744.1889100   744.1889577 -0.0000477 -0.0005000 0.0000456   744.1890178 -0.0001078 0.2500
 2677:  31  6 25  1 31  7 24  0               744.1889100   744.1893215 -0.0004115 -0.0005000 0.0000456   744.1890178 -0.0001078 0.2500
 2678:  18  2 16  1 19  2 17  0               744.2045000   744.2044520  0.0000480 -0.0005000 0.0000248
 2679:  19  1 18  1 20  2 19  0               744.2131200   744.2126265  0.0004935 -0.0005000 0.0000196   744.2132129 -0.0000929 0.5000
 2680:   9  2  8  1 10  3  7  0               744.2131200   744.2137993 -0.0006793 -0.0005000 0.0000196   744.2132129 -0.0000929 0.5000
 2681:  31  5 27  1 31  6 26  0               744.2191900   744.2193781 -0.0001881 -0.0005000 0.0000247   744.2192423 -0.0000523 0.5000
 2682:  18  5 13  1 19  5 14  0               744.2191900   744.2191064  0.0000836 -0.0005000 0.0000247   744.2192423 -0.0000523 0.5000
 2683:  18  5 14  1 19  5 15  0               744.2271700   744.2269728  0.0001972 -0.0005000 0.0000192
 2684:  18  6 13  1 19  6 14  0               744.2354600   744.2364240 -0.0009640 -0.0005000 0.0000290   744.2355311 -0.0000711 0.1667
 2685:  18  6 12  1 19  6 13  0               744.2354600   744.2358710 -0.0004110 -0.0005000 0.0000290   744.2355311 -0.0000711 0.1667
 2686:  20  0 20  1 21  0 21  0               744.2354600   744.2351147  0.0003453 -0.0005000 0.0000290   744.2355311 -0.0000711 0.1667
 2687:  20  1 20  1 21  0 21  0               744.2354600   744.2357281 -0.0002681 -0.0005000 0.0000290   744.2355311 -0.0000711 0.1667
 2688:  20  0 20  1 21  1 21  0               744.2354600   744.2347177  0.0007423 -0.0005000 0.0000290   744.2355311 -0.0000711 0.1667
 2689:  20  1 20  1 21  1 21  0               744.2354600   744.2353311  0.0001289 -0.0005000 0.0000290   744.2355311 -0.0000711 0.1667
 2690:  19  2 18  1 20  2 19  0               744.2401400   744.2400024  0.0001376 -0.0005000 0.0000241
 2691:  18  7 12  1 19  7 13  0               744.2447100   744.2448249 -0.0001149 -0.0005000 0.0000188   744.2448128 -0.0001028 0.5000
 2692:  18  7 11  1 19  7 12  0               744.2447100   744.2448007 -0.0000907 -0.0005000 0.0000188   744.2448128 -0.0001028 0.5000
 2693:  18  8 10  1 19  8 11  0               744.2515500   744.2516157 -0.0000657 -0.0005000 0.0000210   744.2516161 -0.0000661 0.5000
 2694:  18  8 11  1 19  8 12  0               744.2515500   744.2516165 -0.0000665 -0.0005000 0.0000210   744.2516161 -0.0000661 0.5000
 2695:  18  9  9  1 19  9 10  0               744.2575600   744.2575790 -0.0000190 -0.0005000 0.0000250   744.2575790 -0.0000190 0.5000
 2696:  18  9 10  1 19  9 11  0               744.2575600   744.2575790 -0.0000190 -0.0005000 0.0000250   744.2575790 -0.0000190 0.5000
 2697:  18 10  8  1 19 10  9  0               744.2633400   744.2631951  0.0001449 -0.0005000 0.0000301   744.2631951  0.0001449 0.5000
 2698:  18 10  9  1 19 10 10  0               744.2633400   744.2631951  0.0001449 -0.0005000 0.0000301   744.2631951  0.0001449 0.5000
 2699:  30  4 27  1 30  5 26  0               744.2713700   744.2722642 -0.0008942 -0.0005000 0.0000326
 2700:  13  5  8  1 13  6  7  0               744.2795800   744.2795589  0.0000211 -0.0005000 0.0000296   744.2797317 -0.0001517 0.2500
 2701:  18 13  5  1 19 13  6  0               744.2795800   744.2801386 -0.0005586 -0.0005000 0.0000296   744.2797317 -0.0001517 0.2500
 2702:  18 13  6  1 19 13  7  0               744.2795800   744.2801386 -0.0005586 -0.0005000 0.0000296   744.2797317 -0.0001517 0.2500
 2703:  13  5  9  1 13  6  8  0               744.2795800   744.2790908  0.0004892 -0.0005000 0.0000296   744.2797317 -0.0001517 0.2500
 2704:  18 16  3  1 19 16  4  0               744.2999700   744.2991051  0.0008649 -0.0005000 0.0000777   744.2991051  0.0008649 0.5000
 2705:  18 16  2  1 19 16  3  0               744.2999700   744.2991051  0.0008649 -0.0005000 0.0000777   744.2991051  0.0008649 0.5000
 2706:  17  4 13  1 18  4 14  0               744.3113400   744.3115362 -0.0001962 -0.0005000 0.0000224
 2707:  17  2 15  1 18  2 16  0               744.3160200   744.3158419  0.0001781 -0.0005000 0.0000229   744.3154468  0.0005732 0.5000
 2708:  25  2 24  1 25  3 23  0               744.3160200   744.3150517  0.0009683 -0.0005000 0.0000229   744.3154468  0.0005732 0.5000
 2709:  19  5 14  1 19  6 13  0               744.3260100   744.3261129 -0.0001029 -0.0005000 0.0000227   744.3260361 -0.0000261 0.5000
 2710:  22  5 18  1 22  6 17  0               744.3260100   744.3259594  0.0000506 -0.0005000 0.0000227   744.3260361 -0.0000261 0.5000
 2711:  18  1 17  1 19  1 18  0               744.3400500   744.3402253 -0.0001753 -0.0005000 0.0000217
 2712:  19  1 19  1 20  1 20  0               744.3455500   744.3458235 -0.0002735 -0.0005000 0.0000387   744.3456585 -0.0001085 0.2500
 2713:  19  0 19  1 20  0 20  0               744.3455500   744.3454935  0.0000565 -0.0005000 0.0000387   744.3456585 -0.0001085 0.2500
 2714:  19  1 19  1 20  0 20  0               744.3455500   744.3464359 -0.0008859 -0.0005000 0.0000387   744.3456585 -0.0001085 0.2500
 2715:  19  0 19  1 20  1 20  0               744.3455500   744.3448811  0.0006689 -0.0005000 0.0000387   744.3456585 -0.0001085 0.2500
 2716:  18  2 17  1 19  2 18  0               744.3514300   744.3514980 -0.0000680 -0.0005000 0.0000225
 2717:  17  4 14  1 18  4 15  0               744.3534600   744.3529908  0.0004692 -0.0005000 0.0000198   744.3532151  0.0002449 0.5000
 2718:  10  2  8  1 11  3  9  0               744.3534600   744.3534394  0.0000206 -0.0005000 0.0000198   744.3532151  0.0002449 0.5000
 2719:  17  6 12  1 18  6 13  0               744.3635800   744.3635606  0.0000194 -0.0005000 0.0000177   744.3634085  0.0001715 0.5000
 2720:  17  6 11  1 18  6 12  0               744.3635800   744.3632565  0.0003235 -0.0005000 0.0000177   744.3634085  0.0001715 0.5000
 2721:  21  5 16  1 21  6 15  0               744.3665700   744.3663338  0.0002362 -0.0005000 0.0000254
 2722:  17  7 10  1 18  7 11  0               744.3712300   744.3711151  0.0001149 -0.0005000 0.0000174   744.3711334  0.0000966 0.3333
 2723:  17  7 11  1 18  7 12  0               744.3712300   744.3711268  0.0001032 -0.0005000 0.0000174   744.3711334  0.0000966 0.3333
 2724:   8  2  7  1  9  3  6  0               744.3712300   744.3711584  0.0000716 -0.0005000 0.0000174   744.3711334  0.0000966 0.3333
 2725:   5  3  2  1  6  4  3  0               744.3773600   744.3774266 -0.0000666 -0.0005000 0.0000189   744.3772410  0.0001190 0.2500
 2726:   5  3  3  1  6  4  2  0               744.3773600   744.3768502  0.0005098 -0.0005000 0.0000189   744.3772410  0.0001190 0.2500
 2727:  17  8  9  1 18  8 10  0               744.3773600   744.3773434  0.0000166 -0.0005000 0.0000189   744.3772410  0.0001190 0.2500
 2728:  17  8 10  1 18  8 11  0               744.3773600   744.3773437  0.0000163 -0.0005000 0.0000189   744.3772410  0.0001190 0.2500
 2729:  17  9  9  1 18  9 10  0               744.3827200   744.3829208 -0.0002008 -0.0005000 0.0000255   744.3829208 -0.0002008 0.5000
 2730:  17  9  8  1 18  9  9  0               744.3827200   744.3829208 -0.0002008 -0.0005000 0.0000255   744.3829208 -0.0002008 0.5000
 2731:  17  3 15  1 18  3 16  0               744.3843400   744.3849015 -0.0005615 -0.0005000 0.0000191
 2732:  16  2 14  1 17  2 15  0               744.4300100   744.4301231 -0.0001131 -0.0005000 0.0000250
 2733:  17  1 16  1 18  1 17  0               744.4485400   744.4481746  0.0003654 -0.0005000 0.0000186   744.4483559  0.0001841 0.5000
 2734:  16  4 12  1 17  4 13  0               744.4485400   744.4485373  0.0000027 -0.0005000 0.0000186   744.4483559  0.0001841 0.5000
 2735:  18  1 18  1 19  1 19  0               744.4561500   744.4562760 -0.0001260 -0.0005000 0.0000309   744.4563394 -0.0001894 0.3333
 2736:  18  0 18  1 19  0 19  0               744.4561500   744.4557759  0.0003741 -0.0005000 0.0000309   744.4563394 -0.0001894 0.3333
 2737:  26  3 24  1 26  4 23  0               744.4561500   744.4569663 -0.0008163 -0.0005000 0.0000309   744.4563394 -0.0001894 0.3333
 2738:  17  2 16  1 18  2 17  0               744.4634000   744.4633544  0.0000456 -0.0005000 0.0000212
 2739:  16  5 11  1 17  5 12  0               744.4789400   744.4790284 -0.0000884 -0.0005000 0.0000182   744.4787085  0.0002315 0.5000
 2740:  16  4 13  1 17  4 14  0               744.4789400   744.4783885  0.0005515 -0.0005000 0.0000182   744.4787085  0.0002315 0.5000
 2741:  16  6 11  1 17  6 12  0               744.4904200   744.4903209  0.0000991 -0.0005000 0.0000175   744.4902405  0.0001795 0.5000
 2742:  16  6 10  1 17  6 11  0               744.4904200   744.4901602  0.0002598 -0.0005000 0.0000175   744.4902405  0.0001795 0.5000
 2743:  16  8  9  1 17  8 10  0               744.5029900   744.5028257  0.0001643 -0.0005000 0.0000169   744.5028062  0.0001838 0.2500
 2744:  16  8  8  1 17  8  9  0               744.5029900   744.5028256  0.0001644 -0.0005000 0.0000169   744.5028062  0.0001838 0.2500
 2745:  16  1 15  1 17  2 16  0               744.5029900   744.5020339  0.0009561 -0.0005000 0.0000169   744.5028062  0.0001838 0.2500
 2746:  16  3 14  1 17  3 15  0               744.5029900   744.5035395 -0.0005495 -0.0005000 0.0000169   744.5028062  0.0001838 0.2500
 2747:  16 10  6  1 17 10  7  0               744.5133600   744.5131645  0.0001955 -0.0005000 0.0000320   744.5131645  0.0001955 0.5000
 2748:  16 10  7  1 17 10  8  0               744.5133600   744.5131645  0.0001955 -0.0005000 0.0000320   744.5131645  0.0001955 0.5000
 2749:  18  3 16  1 19  2 17  0               744.5288700   744.5284177  0.0004523 -0.0005000 0.0000220   744.5289092 -0.0000392 0.2000
 2750:  23  2 22  1 23  3 21  0               744.5288700   744.5287450  0.0001250 -0.0005000 0.0000220   744.5289092 -0.0000392 0.2000
 2751:  16 13  3  1 17 13  4  0               744.5288700   744.5292408 -0.0003708 -0.0005000 0.0000220   744.5289092 -0.0000392 0.2000
 2752:  25  5 20  1 25  6 19  0               744.5288700   744.5289017 -0.0000317 -0.0005000 0.0000220   744.5289092 -0.0000392 0.2000
 2753:  16 13  4  1 17 13  5  0               744.5288700   744.5292408 -0.0003708 -0.0005000 0.0000220   744.5289092 -0.0000392 0.2000
 2754:  15  3 12  1 16  3 13  0               744.5324200   744.5327074 -0.0002874 -0.0005000 0.0000246
 2755:  16 16  1  1 17 16  2  0               744.5475600   744.5478004 -0.0002404 -0.0005000 0.0000384   744.5476537 -0.0000937 0.2500
 2756:  15  2 13  1 16  2 14  0               744.5475600   744.5475240  0.0000360 -0.0005000 0.0000384   744.5476537 -0.0000937 0.2500
 2757:  16 16  0  1 17 16  1  0               744.5475600   744.5478004 -0.0002404 -0.0005000 0.0000384   744.5476537 -0.0000937 0.2500
 2758:  25  3 23  1 25  4 22  0               744.5475600   744.5474899  0.0000701 -0.0005000 0.0000384   744.5476537 -0.0000937 0.2500
 2759:  16  1 15  1 17  1 16  0               744.5553700   744.5556962 -0.0003262 -0.0005000 0.0000196
 2760:  17  0 17  1 18  0 18  0               744.5663700   744.5659476  0.0004224 -0.0005000 0.0000331   744.5663241  0.0000459 0.5000
 2761:  17  1 17  1 18  1 18  0               744.5663700   744.5667006 -0.0003306 -0.0005000 0.0000331   744.5663241  0.0000459 0.5000
 2762:  16  2 15  1 17  2 16  0               744.5756600   744.5756700 -0.0000100 -0.0005000 0.0000203
 2763:  15  1 14  1 16  2 15  0               744.5901100   744.5894469  0.0006631 -0.0005000 0.0000261   744.5899112  0.0001988 0.5000
 2764:  26  5 21  1 26  6 20  0               744.5901100   744.5903755 -0.0002655 -0.0005000 0.0000261   744.5899112  0.0001988 0.5000
 2765:  15  5 11  1 16  5 12  0               744.6093200   744.6091787  0.0001413 -0.0005000 0.0000175
 2766:  15  6 10  1 16  6 11  0               744.6165600   744.6167136 -0.0001536 -0.0005000 0.0000176   744.6166730 -0.0001130 0.5000
 2767:  15  6  9  1 16  6 10  0               744.6165600   744.6166324 -0.0000724 -0.0005000 0.0000176   744.6166730 -0.0001130 0.5000
 2768:  15  7  9  1 16  7 10  0               744.6229300   744.6228211  0.0001089 -0.0005000 0.0000185   744.6231493 -0.0002193 0.2000
 2769:  15  7  8  1 16  7  9  0               744.6229300   744.6228187  0.0001113 -0.0005000 0.0000185   744.6231493 -0.0002193 0.2000
 2770:  15  3 13  1 16  3 14  0               744.6229300   744.6232181 -0.0002881 -0.0005000 0.0000185   744.6231493 -0.0002193 0.2000
 2771:   3  3  0  1  4  4  1  0               744.6229300   744.6234546 -0.0005246 -0.0005000 0.0000185   744.6231493 -0.0002193 0.2000
 2772:   3  3  1  1  4  4  0  0               744.6229300   744.6234342 -0.0005042 -0.0005000 0.0000185   744.6231493 -0.0002193 0.2000
 2773:  15  8  8  1 16  8  9  0               744.6281400   744.6280742  0.0000658 -0.0005000 0.0000225   744.6280741  0.0000659 0.5000
 2774:  15  8  7  1 16  8  8  0               744.6281400   744.6280741  0.0000659 -0.0005000 0.0000225   744.6280741  0.0000659 0.5000
 2775:  15  9  7  1 16  9  8  0               744.6323600   744.6330046 -0.0006446 -0.0005000 0.0000190   744.6325983 -0.0002383 0.2500
 2776:  22  2 21  1 22  3 20  0               744.6323600   744.6320657  0.0002943 -0.0005000 0.0000190   744.6325983 -0.0002383 0.2500
 2777:  15  9  6  1 16  9  7  0               744.6323600   744.6330046 -0.0006446 -0.0005000 0.0000190   744.6325983 -0.0002383 0.2500
 2778:  24  3 22  1 24  4 21  0               744.6323600   744.6323185  0.0000415 -0.0005000 0.0000190   744.6325983 -0.0002383 0.2500
 2779:  15 11  5  1 16 11  6  0               744.6432900   744.6429040  0.0003860 -0.0005000 0.0000399   744.6429040  0.0003860 0.5000
 2780:  15 11  4  1 16 11  5  0               744.6432900   744.6429040  0.0003860 -0.0005000 0.0000399   744.6429040  0.0003860 0.5000
 2781:  14  2 12  1 15  2 13  0               744.6679300   744.6680264 -0.0000964 -0.0005000 0.0000241
 2782:  14  3 11  1 15  3 12  0               744.6692800   744.6691086  0.0001714 -0.0005000 0.0000226
 2783:  16  0 16  1 17  0 17  0               744.6766200   744.6759885  0.0006315 -0.0005000 0.0000305   744.6765513  0.0000687 0.5000
 2784:  16  1 16  1 17  1 17  0               744.6766200   744.6771140 -0.0004940 -0.0005000 0.0000305   744.6765513  0.0000687 0.5000
 2785:  15  2 14  1 16  2 15  0               744.6884000   744.6885480 -0.0001480 -0.0005000 0.0000196
 2786:  26  2 24  1 26  3 23  0               744.7096400   744.7105622 -0.0009222 -0.0005000 0.0000177   744.7101783 -0.0005383 0.3333
 2787:  14  4 11  1 14  5 10  0               744.7096400   744.7102790 -0.0006390 -0.0005000 0.0000177   744.7101783 -0.0005383 0.3333
 2788:  12  4  8  1 12  5  7  0               744.7096400   744.7096936 -0.0000536 -0.0005000 0.0000177   744.7101783 -0.0005383 0.3333
 2789:  17  4 14  1 17  5 13  0               744.7161000   744.7166193 -0.0005193 -0.0005000 0.0000190   744.7161157 -0.0000157 0.2500
 2790:  16  4 13  1 16  5 12  0               744.7161000   744.7156521  0.0004479 -0.0005000 0.0000190   744.7161157 -0.0000157 0.2500
 2791:  18  4 15  1 18  5 14  0               744.7161000   744.7155100  0.0005900 -0.0005000 0.0000190   744.7161157 -0.0000157 0.2500
 2792:  14  4 10  1 15  4 11  0               744.7161000   744.7166812 -0.0005812 -0.0005000 0.0000190   744.7161157 -0.0000157 0.2500
 2793:  14  4 11  1 15  4 12  0               744.7300400   744.7303617 -0.0003217 -0.0005000 0.0000193   744.7300489 -0.0000089 0.3333
 2794:  14  4 10  1 14  5  9  0               744.7300400   744.7293620  0.0006780 -0.0005000 0.0000193   744.7300489 -0.0000089 0.3333
 2795:  19  0 19  1 19  1 18  0               744.7300400   744.7304229 -0.0003829 -0.0005000 0.0000193   744.7300489 -0.0000089 0.3333
 2796:  14  5  9  1 15  5 10  0               744.7353400   744.7350160  0.0003240 -0.0005000 0.0000175   744.7355067 -0.0001667 0.5000
 2797:  14  5 10  1 15  5 11  0               744.7353400   744.7359974 -0.0006574 -0.0005000 0.0000175   744.7355067 -0.0001667 0.5000
 2798:  14  6  9  1 15  6 10  0               744.7426300   744.7427522 -0.0001222 -0.0005000 0.0000179   744.7427327 -0.0001027 0.5000
 2799:  14  6  8  1 15  6  9  0               744.7426300   744.7427132 -0.0000832 -0.0005000 0.0000179   744.7427327 -0.0001027 0.5000
 2800:  14  3 12  1 15  3 13  0               744.7441200   744.7438996  0.0002204 -0.0005000 0.0000208   744.7438816  0.0002384 0.5000
 2801:  22  1 21  1 22  2 20  0               744.7441200   744.7438635  0.0002565 -0.0005000 0.0000208   744.7438816  0.0002384 0.5000
 2802:  14  7  8  1 15  7  9  0               744.7482600   744.7482443  0.0000157 -0.0005000 0.0000178   744.7482057  0.0000543 0.3333
 2803:  14  7  7  1 15  7  8  0               744.7482600   744.7482434  0.0000166 -0.0005000 0.0000178   744.7482057  0.0000543 0.3333
 2804:  13  1 12  1 14  2 13  0               744.7482600   744.7481294  0.0001306 -0.0005000 0.0000178   744.7482057  0.0000543 0.3333
 2805:  14  8  7  1 15  8  8  0               744.7531400   744.7531004  0.0000396 -0.0005000 0.0000233
 2806:  14  8  6  1 15  8  7  0               744.7532200   744.7531003  0.0001197 -0.0005000 0.0000233
 2807:  14  9  5  1 15  9  6  0               744.7577400   744.7577638 -0.0000238 -0.0005000 0.0000282   744.7577638 -0.0000238 0.5000
 2808:  14  9  6  1 15  9  7  0               744.7577400   744.7577638 -0.0000238 -0.0005000 0.0000282   744.7577638 -0.0000238 0.5000
 2809:  14 10  4  1 15 10  5  0               744.7623800   744.7624667 -0.0000867 -0.0005000 0.0000243   744.7623402  0.0000398 0.3333
 2810:  14 10  5  1 15 10  6  0               744.7623800   744.7624667 -0.0000867 -0.0005000 0.0000243   744.7623402  0.0000398 0.3333
 2811:  15  2 14  1 16  1 15  0               744.7623800   744.7620872  0.0002928 -0.0005000 0.0000243   744.7623402  0.0000398 0.3333
 2812:  14  1 13  1 15  1 14  0               744.7705600   744.7704285  0.0001315 -0.0005000 0.0000193
 2813:  22  3 20  1 22  4 19  0               744.7825200   744.7824442  0.0000758 -0.0005000 0.0000226   744.7825036  0.0000164 0.5000
 2814:  15  0 15  1 16  1 16  0               744.7825200   744.7825629 -0.0000429 -0.0005000 0.0000226   744.7825036  0.0000164 0.5000
 2815:  15  0 15  1 16  0 16  0               744.7859600   744.7858721  0.0000879 -0.0005000 0.0000282
 2816:  15  1 15  1 16  1 16  0               744.7875900   744.7875395  0.0000505 -0.0005000 0.0000284
 2817:  34  4 30  1 34  5 29  0               744.7911500   744.7908884  0.0002616 -0.0005000 0.0000202   744.7910602  0.0000898 0.3333
 2818:  13  2 11  1 14  2 12  0               744.7911500   744.7914435 -0.0002935 -0.0005000 0.0000202   744.7910602  0.0000898 0.3333
 2819:  15  1 15  1 16  0 16  0               744.7911500   744.7908486  0.0003014 -0.0005000 0.0000202   744.7910602  0.0000898 0.3333
 2820:  14  2 13  1 15  2 14  0               744.8021100   744.8020896  0.0000204 -0.0005000 0.0000193
 2821:  18  0 18  1 18  1 17  0               744.8482100   744.8486121 -0.0004021 -0.0005000 0.0000220   744.8482736 -0.0000636 0.5000
 2822:  13  4  9  1 14  4 10  0               744.8482100   744.8479351  0.0002749 -0.0005000 0.0000220   744.8482736 -0.0000636 0.5000
 2823:  13  4 10  1 14  4 11  0               744.8564800   744.8566176 -0.0001376 -0.0005000 0.0000182
 2824:  13  5  9  1 14  5 10  0               744.8621000   744.8624562 -0.0003562 -0.0005000 0.0000178   744.8621942 -0.0000942 0.5000
 2825:  13  5  8  1 14  5  9  0               744.8621000   744.8619323  0.0001677 -0.0005000 0.0000178   744.8621942 -0.0000942 0.5000
 2826:  13  6  7  1 14  6  8  0               744.8685200   744.8684354  0.0000846 -0.0005000 0.0000185   744.8684443  0.0000757 0.5000
 2827:  13  6  8  1 14  6  9  0               744.8685200   744.8684531  0.0000669 -0.0005000 0.0000185   744.8684443  0.0000757 0.5000
 2828:  13  7  6  1 14  7  7  0               744.8732700   744.8734049 -0.0001349 -0.0005000 0.0000229   744.8734210 -0.0001510 0.2500
 2829:  19  4 15  1 19  5 14  0               744.8732700   744.8731905  0.0000795 -0.0005000 0.0000229   744.8734210 -0.0001510 0.2500
 2830:  13  7  7  1 14  7  8  0               744.8732700   744.8734053 -0.0001353 -0.0005000 0.0000229   744.8734210 -0.0001510 0.2500
 2831:  30  5 25  1 30  6 24  0               744.8732700   744.8736834 -0.0004134 -0.0005000 0.0000229   744.8734210 -0.0001510 0.2500
 2832:  13  1 12  1 14  1 13  0               744.8782700   744.8786044 -0.0003344 -0.0005000 0.0000175   744.8781937  0.0000763 0.2500
 2833:  13  8  5  1 14  8  6  0               744.8782700   744.8779154  0.0003546 -0.0005000 0.0000175   744.8781937  0.0000763 0.2500
 2834:  13  8  6  1 14  8  7  0               744.8782700   744.8779154  0.0003546 -0.0005000 0.0000175   744.8781937  0.0000763 0.2500
 2835:  21  1 20  1 21  2 19  0               744.8782700   744.8783396 -0.0000696 -0.0005000 0.0000175   744.8781937  0.0000763 0.2500
 2836:  13 11  3  1 14 11  4  0               744.8907900   744.8916354 -0.0008454 -0.0005000 0.0000213   744.8912227 -0.0004327 0.2500
 2837:  29  3 26  1 29  4 25  0               744.8907900   744.8910257 -0.0002357 -0.0005000 0.0000213   744.8912227 -0.0004327 0.2500
 2838:  13 11  2  1 14 11  3  0               744.8907900   744.8916354 -0.0008454 -0.0005000 0.0000213   744.8912227 -0.0004327 0.2500
 2839:  14  0 14  1 15  1 15  0               744.8907900   744.8905944  0.0001956 -0.0005000 0.0000213   744.8912227 -0.0004327 0.2500
 2840:  14  0 14  1 15  0 15  0               744.8956200   744.8955638  0.0000562 -0.0005000 0.0000200   744.8956402 -0.0000202 0.5000
 2841:  16  3 14  1 17  2 15  0               744.8956200   744.8957166 -0.0000966 -0.0005000 0.0000200   744.8956402 -0.0000202 0.5000
 2842:  20  3 18  1 20  4 17  0               744.9032000   744.9035710 -0.0003710 -0.0005000 0.0000209   744.9032745 -0.0000745 0.5000
 2843:  14  1 14  1 15  0 15  0               744.9032000   744.9029779  0.0002221 -0.0005000 0.0000209   744.9032745 -0.0000745 0.5000
 2844:  13  2 12  1 14  2 13  0               744.9165800   744.9163873  0.0001927 -0.0005000 0.0000200   744.9170912 -0.0005112 0.3333
 2845:  17  1 17  1 17  2 16  0               744.9165800   744.9173851 -0.0008051 -0.0005000 0.0000200   744.9170912 -0.0005112 0.3333
 2846:  12  2 10  1 13  2 11  0               744.9165800   744.9175012 -0.0009212 -0.0005000 0.0000200   744.9170912 -0.0005112 0.3333
 2847:  19  2 18  1 19  3 17  0               744.9202600   744.9204654 -0.0002054 -0.0005000 0.0000241
 2848:  31  5 26  1 31  6 25  0               744.9342400   744.9342444 -0.0000044 -0.0005000 0.0000590
 2849:  12  3  9  1 13  3 10  0               744.9432600   744.9428888  0.0003712 -0.0005000 0.0000204
 2850:  17  0 17  1 17  1 16  0               744.9689400   744.9688555  0.0000845 -0.0005000 0.0000330
 2851:  12  4  8  1 13  4  9  0               744.9770900   744.9775997 -0.0005097 -0.0005000 0.0000186
 2852:  12  5  7  1 13  5  8  0               744.9880800   744.9882769 -0.0001969 -0.0005000 0.0000185   744.9882526 -0.0001726 0.2500
 2853:  12  3 10  1 13  3 11  0               744.9880800   744.9879740  0.0001060 -0.0005000 0.0000185   744.9882526 -0.0001726 0.2500
 2854:  12  1 11  1 13  1 12  0               744.9880800   744.9882177 -0.0001377 -0.0005000 0.0000185   744.9882526 -0.0001726 0.2500
 2855:  12  5  8  1 13  5  9  0               744.9880800   744.9885418 -0.0004618 -0.0005000 0.0000185   744.9882526 -0.0001726 0.2500
 2856:  18  3 16  1 18  4 15  0               744.9940400   744.9943130 -0.0002730 -0.0005000 0.0000171   744.9939915  0.0000485 0.3333
 2857:  12  6  6  1 13  6  7  0               744.9940400   744.9938271  0.0002129 -0.0005000 0.0000171   744.9939915  0.0000485 0.3333
 2858:  12  6  7  1 13  6  8  0               744.9940400   744.9938346  0.0002054 -0.0005000 0.0000171   744.9939915  0.0000485 0.3333
 2859:  13  0 13  1 14  1 14  0               744.9978700   744.9976191  0.0002509 -0.0005000 0.0000195   744.9980855 -0.0002155 0.3333
 2860:  12  7  6  1 13  7  7  0               744.9978700   744.9983188 -0.0004488 -0.0005000 0.0000195   744.9980855 -0.0002155 0.3333
 2861:  12  7  5  1 13  7  6  0               744.9978700   744.9983186 -0.0004486 -0.0005000 0.0000195   744.9980855 -0.0002155 0.3333
 2862:  18  2 17  1 18  3 16  0               745.0070400   745.0071219 -0.0000819 -0.0005000 0.0000181   745.0070505 -0.0000105 0.2500
 2863:  12  9  3  1 13  9  4  0               745.0070400   745.0067592  0.0002808 -0.0005000 0.0000181   745.0070505 -0.0000105 0.2500
 2864:  24  2 22  1 24  3 21  0               745.0070400   745.0075617 -0.0005217 -0.0005000 0.0000181   745.0070505 -0.0000105 0.2500
 2865:  12  9  4  1 13  9  5  0               745.0070400   745.0067592  0.0002808 -0.0005000 0.0000181   745.0070505 -0.0000105 0.2500
 2866:  13  1 13  1 14  0 14  0               745.0158000   745.0159661 -0.0001661 -0.0005000 0.0000248   745.0157834  0.0000166 0.2500
 2867:  12 11  1  1 13 11  2  0               745.0158000   745.0158025 -0.0000025 -0.0005000 0.0000248   745.0157834  0.0000166 0.2500
 2868:  12 11  2  1 13 11  3  0               745.0158000   745.0158025 -0.0000025 -0.0005000 0.0000248   745.0157834  0.0000166 0.2500
 2869:  20  1 19  1 20  2 18  0               745.0158000   745.0155625  0.0002375 -0.0005000 0.0000248   745.0157834  0.0000166 0.2500
 2870:  12  2 11  1 13  2 12  0               745.0315800   745.0315177  0.0000623 -0.0005000 0.0000195
 2871:  11  2  9  1 12  2 10  0               745.0465700   745.0458923  0.0006777 -0.0005000 0.0000198   745.0463773  0.0001927 0.5000
 2872:  13  2 12  1 14  1 13  0               745.0465700   745.0468623 -0.0002923 -0.0005000 0.0000198   745.0463773  0.0001927 0.5000
 2873:  11  3  8  1 12  3  9  0               745.0784100   745.0785949 -0.0001849 -0.0005000 0.0000200
 2874:  16  0 16  1 16  1 15  0               745.0916700   745.0914474  0.0002226 -0.0005000 0.0000219   745.0918617 -0.0001917 0.5000
 2875:   8  1  7  1  9  2  8  0               745.0916700   745.0922759 -0.0006059 -0.0005000 0.0000219   745.0918617 -0.0001917 0.5000
 2876:  11  1 10  1 12  1 11  0               745.1002400   745.0999432  0.0002968 -0.0005000 0.0000207
 2877:  11  5  7  1 12  5  8  0               745.1143700   745.1142547  0.0001153 -0.0005000 0.0000190   745.1141970  0.0001730 0.3333
 2878:  11  5  6  1 12  5  7  0               745.1143700   745.1141289  0.0002411 -0.0005000 0.0000190   745.1141970  0.0001730 0.3333
 2879:  12  0 12  1 13  0 13  0               745.1143700   745.1142073  0.0001627 -0.0005000 0.0000190   745.1141970  0.0001730 0.3333
 2880:   7  3  5  1  7  4  4  0               745.1175700   745.1174259  0.0001441 -0.0005000 0.0000210   745.1176292 -0.0000592 0.2000
 2881:   8  3  6  1  8  4  5  0               745.1175700   745.1180346 -0.0004646 -0.0005000 0.0000210   745.1176292 -0.0000592 0.2000
 2882:   6  3  4  1  6  4  3  0               745.1175700   745.1167614  0.0008086 -0.0005000 0.0000210   745.1176292 -0.0000592 0.2000
 2883:   9  3  7  1  9  4  6  0               745.1175700   745.1182668 -0.0006968 -0.0005000 0.0000210   745.1176292 -0.0000592 0.2000
 2884:  10  3  8  1 10  4  7  0               745.1175700   745.1176573 -0.0000873 -0.0005000 0.0000210   745.1176292 -0.0000592 0.2000
 2885:  12  1 12  1 13  1 13  0               745.1189400   745.1192537 -0.0003137 -0.0005000 0.0000197   745.1188690  0.0000710 0.2500
 2886:  11  6  5  1 12  6  6  0               745.1189400   745.1189127  0.0000273 -0.0005000 0.0000197   745.1188690  0.0000710 0.2500
 2887:   6  3  3  1  6  4  2  0               745.1189400   745.1183939  0.0005461 -0.0005000 0.0000197   745.1188690  0.0000710 0.2500
 2888:  11  6  6  1 12  6  7  0               745.1189400   745.1189157  0.0000243 -0.0005000 0.0000197   745.1188690  0.0000710 0.2500
 2889:   8  3  5  1  8  4  4  0               745.1270000   745.1267294  0.0002706 -0.0005000 0.0000226   745.1268801  0.0001199 0.3333
 2890:  11  8  4  1 12  8  5  0               745.1270000   745.1269554  0.0000446 -0.0005000 0.0000226   745.1268801  0.0001199 0.3333
 2891:  11  8  3  1 12  8  4  0               745.1270000   745.1269554  0.0000446 -0.0005000 0.0000226   745.1268801  0.0001199 0.3333
 2892:  11 10  1  1 12 10  2  0               745.1353800   745.1352866  0.0000934 -0.0005000 0.0000284   745.1352684  0.0001116 0.3333
 2893:  11 10  2  1 12 10  3  0               745.1353800   745.1352866  0.0000934 -0.0005000 0.0000284   745.1352684  0.0001116 0.3333
 2894:   9  3  6  1  9  4  5  0               745.1353800   745.1352320  0.0001480 -0.0005000 0.0000284   745.1352684  0.0001116 0.3333
 2895:  11 11  1  1 12 11  2  0               745.1392800   745.1398445 -0.0005645 -0.0005000 0.0000454   745.1398445 -0.0005645 0.5000
 2896:  11 11  0  1 12 11  1  0               745.1392800   745.1398445 -0.0005645 -0.0005000 0.0000454   745.1398445 -0.0005645 0.5000
 2897:  11  2 10  1 12  2 11  0               745.1477700   745.1475352  0.0002348 -0.0005000 0.0000198   745.1478439 -0.0000739 0.5000
 2898:  10  3  7  1 10  4  6  0               745.1477700   745.1481526 -0.0003826 -0.0005000 0.0000198   745.1478439 -0.0000739 0.5000
 2899:  27  3 24  1 27  4 23  0               745.1622900   745.1621661  0.0001239 -0.0005000 0.0000276   745.1621549  0.0001351 0.3333
 2900:  16  2 15  1 16  3 14  0               745.1622900   745.1622799  0.0000101 -0.0005000 0.0000276   745.1621549  0.0001351 0.3333
 2901:  24  4 20  1 24  5 19  0               745.1622900   745.1620187  0.0002713 -0.0005000 0.0000276   745.1621549  0.0001351 0.3333
 2902:   2  2  0  1  3  3  1  0               745.1688400   745.1694440 -0.0006040 -0.0005000 0.0000241   745.1691050 -0.0002650 0.5000
 2903:   2  2  1  1  3  3  0  0               745.1688400   745.1687661  0.0000739 -0.0005000 0.0000241   745.1691050 -0.0002650 0.5000
 2904:  10  2  8  1 11  2  9  0               745.1759200   745.1762885 -0.0003685 -0.0005000 0.0000219
 2905:  10  3  7  1 11  3  8  0               745.2125900   745.2126448 -0.0000548 -0.0005000 0.0000201
 2906:  11  0 11  1 12  0 12  0               745.2232000   745.2230885  0.0001115 -0.0005000 0.0000226
 2907:  15  2 14  1 15  3 13  0               745.2301700   745.2297280  0.0004420 -0.0005000 0.0000209   745.2299373  0.0002327 0.5000
 2908:  11  1 11  1 12  1 12  0               745.2301700   745.2301465  0.0000235 -0.0005000 0.0000209   745.2299373  0.0002327 0.5000
 2909:  10  4  7  1 11  4  8  0               745.2347200   745.2348380 -0.0001180 -0.0005000 0.0000196   745.2348729 -0.0001529 0.5000
 2910:  10  3  8  1 11  3  9  0               745.2347200   745.2349077 -0.0001877 -0.0005000 0.0000196   745.2348729 -0.0001529 0.5000
 2911:  10  5  6  1 11  5  7  0               745.2396000   745.2396051 -0.0000051 -0.0005000 0.0000197   745.2395774  0.0000226 0.5000
 2912:  10  5  5  1 11  5  6  0               745.2396000   745.2395497  0.0000503 -0.0005000 0.0000197   745.2395774  0.0000226 0.5000
 2913:  10  7  3  1 11  7  4  0               745.2466400   745.2474612 -0.0008212 -0.0005000 0.0000176   745.2469953 -0.0003553 0.2500
 2914:  26  4 22  1 26  5 21  0               745.2466400   745.2469584 -0.0003184 -0.0005000 0.0000176   745.2469953 -0.0003553 0.2500
 2915:  10  7  4  1 11  7  5  0               745.2466400   745.2474612 -0.0008212 -0.0005000 0.0000176   745.2469953 -0.0003553 0.2500
 2916:  11  1 11  1 12  0 12  0               745.2466400   745.2461004  0.0005396 -0.0005000 0.0000176   745.2469953 -0.0003553 0.2500
 2917:  10  9  2  1 11  9  3  0               745.2558700   745.2551126  0.0007574 -0.0005000 0.0000329   745.2551126  0.0007574 0.5000
 2918:  10  9  1  1 11  9  2  0               745.2558700   745.2551126  0.0007574 -0.0005000 0.0000329   745.2551126  0.0007574 0.5000
 2919:  14  3 11  1 14  4 10  0               745.2646900   745.2645576  0.0001324 -0.0005000 0.0000201   745.2645128  0.0001772 0.5000
 2920:  10  2  9  1 11  2 10  0               745.2646900   745.2644681  0.0002219 -0.0005000 0.0000201   745.2645128  0.0001772 0.5000
 2921:  10  0 10  1 11  1 11  0               745.3084600   745.3086973 -0.0002373 -0.0005000 0.0000208   745.3085031 -0.0000431 0.5000
 2922:   9  2  7  1 10  2  8  0               745.3084600   745.3083088  0.0001512 -0.0005000 0.0000208   745.3085031 -0.0000431 0.5000
 2923:   9  1  8  1 10  1  9  0               745.3315300   745.3313595  0.0001705 -0.0005000 0.0000210   745.3315198  0.0000102 0.5000
 2924:  10  0 10  1 11  0 11  0               745.3315300   745.3316800 -0.0001500 -0.0005000 0.0000210   745.3315198  0.0000102 0.5000
 2925:  10  1 10  1 11  1 11  0               745.3417000   745.3413154  0.0003846 -0.0005000 0.0000226
 2926:  16  3 13  1 16  4 12  0               745.3589700   745.3589032  0.0000668 -0.0005000 0.0000196   745.3590565 -0.0000865 0.2500
 2927:   9  3  7  1 10  3  8  0               745.3589700   745.3590895 -0.0001195 -0.0005000 0.0000196   745.3590565 -0.0000865 0.2500
 2928:   9  4  5  1 10  4  6  0               745.3589700   745.3595832 -0.0006132 -0.0005000 0.0000196   745.3590565 -0.0000865 0.2500
 2929:  11  2 10  1 12  1 11  0               745.3589700   745.3586501  0.0003199 -0.0005000 0.0000196   745.3590565 -0.0000865 0.2500
 2930:  10  1 10  1 11  0 11  0               745.3647200   745.3642981  0.0004219 -0.0005000 0.0000203   745.3644989  0.0002211 0.3333
 2931:   9  5  4  1 10  5  5  0               745.3647200   745.3645882  0.0001318 -0.0005000 0.0000203   745.3644989  0.0002211 0.3333
 2932:   9  5  5  1 10  5  6  0               745.3647200   745.3646105  0.0001095 -0.0005000 0.0000203   745.3644989  0.0002211 0.3333
 2933:   9  6  3  1 10  6  4  0               745.3680100   745.3682542 -0.0002442 -0.0005000 0.0000219   745.3682544 -0.0002444 0.5000
 2934:   9  6  4  1 10  6  5  0               745.3680100   745.3682545 -0.0002445 -0.0005000 0.0000219   745.3682544 -0.0002444 0.5000
 2935:   9  2  8  1 10  2  9  0               745.3823100   745.3823173 -0.0000073 -0.0005000 0.0000208
 2936:  17  3 14  1 17  4 13  0               745.4074900   745.4076873 -0.0001973 -0.0005000 0.0000207   745.4075977 -0.0001077 0.5000
 2937:   9  0  9  1 10  1 10  0               745.4074900   745.4075081 -0.0000181 -0.0005000 0.0000207   745.4075977 -0.0001077 0.5000
 2938:  21  2 19  1 21  3 18  0               745.4098500   745.4098458  0.0000042 -0.0005000 0.0000237
 2939:  11  2 10  1 11  3  9  0               745.4261500   745.4262145 -0.0000645 -0.0005000 0.0000193   745.4262884 -0.0001384 0.5000
 2940:  17  1 16  1 17  2 15  0               745.4261500   745.4263624 -0.0002124 -0.0005000 0.0000193   745.4262884 -0.0001384 0.5000
 2941:   9  0  9  1 10  0 10  0               745.4400400   745.4400861 -0.0000461 -0.0005000 0.0000221
 2942:   8  2  6  1  9  2  7  0               745.4415700   745.4414610  0.0001090 -0.0005000 0.0000218
 2943:   8  1  7  1  9  1  8  0               745.4512400   745.4511508  0.0000892 -0.0005000 0.0000221
 2944:   9  1  9  1 10  1 10  0               745.4527000   745.4528418 -0.0001418 -0.0005000 0.0000208   745.4526681  0.0000319 0.5000
 2945:  18  3 15  1 18  4 14  0               745.4527000   745.4524945  0.0002055 -0.0005000 0.0000208   745.4526681  0.0000319 0.5000
 2946:   8  3  6  1  9  3  7  0               745.4837700   745.4835368  0.0002332 -0.0005000 0.0000210
 2947:   9  1  9  1 10  0 10  0               745.4851300   745.4854198 -0.0002898 -0.0005000 0.0000209   745.4854453 -0.0003153 0.3333
 2948:   8  4  5  1  9  4  6  0               745.4851300   745.4856516 -0.0005216 -0.0005000 0.0000209   745.4854453 -0.0003153 0.3333
 2949:   8  4  4  1  9  4  5  0               745.4851300   745.4852645 -0.0001345 -0.0005000 0.0000209   745.4854453 -0.0003153 0.3333
 2950:   8  6  3  1  9  6  4  0               745.4923000   745.4925511 -0.0002511 -0.0005000 0.0000229   745.4925511 -0.0002511 0.5000
 2951:   8  6  2  1  9  6  3  0               745.4923000   745.4925510 -0.0002510 -0.0005000 0.0000229   745.4925511 -0.0002511 0.5000
 2952:  20  2 18  1 20  3 17  0               745.5187200   745.5182541  0.0004659 -0.0005000 0.0000240
 2953:   7  1  6  1  8  1  7  0               745.5734300   745.5733526  0.0000774 -0.0005000 0.0000225
 2954:   7  2  5  1  8  2  6  0               745.5753800   745.5750902  0.0002898 -0.0005000 0.0000221
 2955:   7  3  5  1  8  3  6  0               745.6082100   745.6080939  0.0001161 -0.0005000 0.0000216
 2956:   8  1  8  1  9  0  9  0               745.6102900   745.6100884  0.0002016 -0.0005000 0.0000215   745.6103312 -0.0000412 0.3333
 2957:   7  4  4  1  8  4  5  0               745.6102900   745.6105338 -0.0002438 -0.0005000 0.0000215   745.6103312 -0.0000412 0.3333
 2958:   7  4  3  1  8  4  4  0               745.6102900   745.6103714 -0.0000814 -0.0005000 0.0000215   745.6103312 -0.0000412 0.3333
 2959:   7  5  3  1  8  5  4  0               745.6135600   745.6136767 -0.0001167 -0.0005000 0.0000222   745.6136755 -0.0001155 0.5000
 2960:   7  5  2  1  8  5  3  0               745.6135600   745.6136742 -0.0001142 -0.0005000 0.0000222   745.6136755 -0.0001155 0.5000
 2961:   7  7  1  1  8  7  2  0               745.6203100   745.6196748  0.0006352 -0.0005000 0.0000234   745.6199955  0.0003145 0.3333
 2962:   7  2  6  1  8  2  7  0               745.6203100   745.6206370 -0.0003270 -0.0005000 0.0000234   745.6199955  0.0003145 0.3333
 2963:   7  7  0  1  8  7  1  0               745.6203100   745.6196748  0.0006352 -0.0005000 0.0000234   745.6199955  0.0003145 0.3333
 2964:   9  1  9  1  9  2  8  0               745.6391200   745.6389151  0.0002049 -0.0005000 0.0000225
 2965:   7  0  7  1  8  0  8  0               745.6576700   745.6575735  0.0000965 -0.0005000 0.0000225
 2966:  15  1 14  1 15  2 13  0               745.6703200   745.6707928 -0.0004728 -0.0005000 0.0000192
 2967:   7  1  7  1  8  1  8  0               745.6772000   745.6772914 -0.0000914 -0.0005000 0.0000227
 2968:  10  2  8  1 10  3  7  0               745.6810600   745.6816583 -0.0005983 -0.0005000 0.0000220   745.6814764 -0.0004164 0.5000
 2969:  18  2 16  1 18  3 15  0               745.6810600   745.6812944 -0.0002344 -0.0005000 0.0000220   745.6814764 -0.0004164 0.5000
 2970:   6  1  5  1  7  1  6  0               745.6966500   745.6975911 -0.0009411 -0.0005000 0.0000229
 2971:  11  0 11  1 11  1 10  0               745.7244300   745.7239152  0.0005148 -0.0005000 0.0000226
 2972:  17  2 15  1 17  3 14  0               745.7337200   745.7341288 -0.0004088 -0.0005000 0.0000250
 2973:   6  6  0  1  7  6  1  0               745.7408200   745.7404942  0.0003258 -0.0005000 0.0000230   745.7406591  0.0001609 0.3333
 2974:   6  2  5  1  7  2  6  0               745.7408200   745.7409888 -0.0001688 -0.0005000 0.0000230   745.7406591  0.0001609 0.3333
 2975:   6  6  1  1  7  6  2  0               745.7408200   745.7404942  0.0003258 -0.0005000 0.0000230   745.7406591  0.0001609 0.3333
 2976:  12  2 10  1 12  3  9  0               745.7484500   745.7478313  0.0006187 -0.0005000 0.0000228
 2977:   6  0  6  1  7  0  7  0               745.7676600   745.7677464 -0.0000864 -0.0005000 0.0000209   745.7679521 -0.0002921 0.5000
 2978:  16  2 14  1 16  3 13  0               745.7676600   745.7681579 -0.0004979 -0.0005000 0.0000209   745.7679521 -0.0002921 0.5000
 2979:  15  2 13  1 15  3 12  0               745.7846900   745.7845215  0.0001685 -0.0005000 0.0000244   745.7847356 -0.0000456 0.5000
 2980:  14  2 12  1 14  3 11  0               745.7846900   745.7849498 -0.0002598 -0.0005000 0.0000244   745.7847356 -0.0000456 0.5000
 2981:   6  1  6  1  7  1  7  0               745.7903700   745.7903504  0.0000196 -0.0005000 0.0000231
 2982:   5  1  4  1  6  1  5  0               745.8236700   745.8234777  0.0001923 -0.0005000 0.0000233
 2983:   5  3  2  1  6  3  3  0               745.8559700   745.8558985  0.0000715 -0.0005000 0.0000229   745.8561123 -0.0001423 0.3333
 2984:   5  3  3  1  6  3  4  0               745.8559700   745.8569984 -0.0010284 -0.0005000 0.0000229   745.8561123 -0.0001423 0.3333
 2985:   5  1  5  1  5  2  4  0               745.8559700   745.8554400  0.0005300 -0.0005000 0.0000229   745.8561123 -0.0001423 0.3333
 2986:   5  4  2  1  6  4  3  0               745.8592900   745.8592601  0.0000299 -0.0005000 0.0000221   745.8594780 -0.0001880 0.3333
 2987:   8  2  7  1  9  1  8  0               745.8592900   745.8599316 -0.0006416 -0.0005000 0.0000221   745.8594780 -0.0001880 0.3333
 2988:   5  4  1  1  6  4  2  0               745.8592900   745.8592423  0.0000477 -0.0005000 0.0000221   745.8594780 -0.0001880 0.3333
 2989:   5  0  5  1  6  0  6  0               745.8800200   745.8797557  0.0002643 -0.0005000 0.0000233
 2990:   5  1  5  1  6  1  6  0               745.9040900   745.9040197  0.0000703 -0.0005000 0.0000234
 2991:   9  0  9  1  9  1  8  0               745.9523700   745.9524563 -0.0000863 -0.0005000 0.0000221
 2992:   4  2  2  1  5  2  3  0               745.9706500   745.9709548 -0.0003048 -0.0005000 0.0000234
 2993:   4  3  2  1  5  3  3  0               745.9809700   745.9811462 -0.0001762 -0.0005000 0.0000233   745.9809387  0.0000313 0.5000
 2994:   4  3  1  1  5  3  2  0               745.9809700   745.9807312  0.0002388 -0.0005000 0.0000233   745.9809387  0.0000313 0.5000
 2995:   4  0  4  1  5  0  5  0               745.9940700   745.9941013 -0.0000313 -0.0005000 0.0000237
 2996:   4  1  4  1  5  1  5  0               746.0190000   746.0183007  0.0006993 -0.0005000 0.0000237
 2997:  10  1  9  1 10  2  8  0               746.0295100   746.0294021  0.0001079 -0.0005000 0.0000212
 2998:   8  1  7  1  8  2  6  0               746.0643500   746.0641014  0.0002486 -0.0005000 0.0000221
 2999:   3  1  2  1  4  1  3  0               746.0787000   746.0788050 -0.0001050 -0.0005000 0.0000240
 3000:   3  2  1  1  4  2  2  0               746.0991500   746.0992960 -0.0001460 -0.0005000 0.0000238
 3001:   2  0  2  1  3  0  3  0               746.2307500   746.2300998  0.0006502 -0.0005000 0.0000244
 3002:   2  1  2  1  3  1  3  0               746.2487300   746.2485174  0.0002126 -0.0005000 0.0000243
 3003:   5  0  5  1  5  1  4  0               746.2640000   746.2637199  0.0002801 -0.0005000 0.0000233
 3004:   1  1  0  1  2  1  1  0               746.3360700   746.3370149 -0.0009449 -0.0005000 0.0000245
 3005:   1  1  1  1  2  1  2  0               746.3642300   746.3642725 -0.0000425 -0.0005000 0.0000245
 3006:  15  4 12  1 15  4 11  0               746.5582600   746.5592324 -0.0009724 -0.0005000 0.0000183
 3007:  10  3  8  1 10  3  7  0               746.5629800   746.5631267 -0.0001467 -0.0005000 0.0000199
 3008:  11  5  6  1 11  5  7  0               746.5983500   746.5977622  0.0005878 -0.0005000 0.0000180   746.5981659  0.0001841 0.0233
 3009:  11  5  7  1 11  5  6  0               746.5983500   746.5975844  0.0007656 -0.0005000 0.0000180   746.5981659  0.0001841 0.0233
 3010:  16  7  9  1 16  7 10  0               746.5983500   746.5986881 -0.0003381 -0.0005000 0.0000180   746.5981659  0.0001841 0.0233
 3011:  17  7 11  1 17  7 10  0               746.5983500   746.5977561  0.0005939 -0.0005000 0.0000180   746.5981659  0.0001841 0.0233
 3012:  17  7 10  1 17  7 11  0               746.5983500   746.5977747  0.0005753 -0.0005000 0.0000180   746.5981659  0.0001841 0.0233
 3013:  11  4  7  1 11  4  8  0               746.5983500   746.5989829 -0.0006329 -0.0005000 0.0000180   746.5981659  0.0001841 0.0233
 3014:  25 10 16  1 25 10 15  0               746.5983500   746.5984965 -0.0001465 -0.0005000 0.0000180   746.5981659  0.0001841 0.0233
 3015:   4  4  1  1  4  4  0  0               746.5983500   746.5988836 -0.0005336 -0.0005000 0.0000180   746.5981659  0.0001841 0.0233
 3016:  22  9 14  1 22  9 13  0               746.5983500   746.5986800 -0.0003300 -0.0005000 0.0000180   746.5981659  0.0001841 0.0233
 3017:   6  4  3  1  6  4  2  0               746.5983500   746.5982692  0.0000808 -0.0005000 0.0000180   746.5981659  0.0001841 0.0233
 3018:  13  6  7  1 13  6  8  0               746.5983500   746.5985354 -0.0001854 -0.0005000 0.0000180   746.5981659  0.0001841 0.0233
 3019:   6  3  3  1  6  3  4  0               746.5983500   746.5985421 -0.0001921 -0.0005000 0.0000180   746.5981659  0.0001841 0.0233
 3020:   3  3  0  1  3  3  1  0               746.5983500   746.5977130  0.0006370 -0.0005000 0.0000180   746.5981659  0.0001841 0.0233
 3021:   8  4  4  1  8  4  5  0               746.5983500   746.5977292  0.0006208 -0.0005000 0.0000180   746.5981659  0.0001841 0.0233
 3022:   9  4  5  1  9  4  6  0               746.5983500   746.5976335  0.0007165 -0.0005000 0.0000180   746.5981659  0.0001841 0.0233
 3023:  19  8 12  1 19  8 11  0               746.5983500   746.5987383 -0.0003883 -0.0005000 0.0000180   746.5981659  0.0001841 0.0233
 3024:  23  9 14  1 23  9 15  0               746.5983500   746.5974292  0.0009208 -0.0005000 0.0000180   746.5981659  0.0001841 0.0233
 3025:   4  4  0  1  4  4  1  0               746.5983500   746.5988846 -0.0005346 -0.0005000 0.0000180   746.5981659  0.0001841 0.0233
 3026:   5  4  2  1  5  4  1  0               746.5983500   746.5986101 -0.0002601 -0.0005000 0.0000180   746.5981659  0.0001841 0.0233
 3027:  22  9 13  1 22  9 14  0               746.5983500   746.5986808 -0.0003308 -0.0005000 0.0000180   746.5981659  0.0001841 0.0233
 3028:  13  6  8  1 13  6  7  0               746.5983500   746.5985117 -0.0001617 -0.0005000 0.0000180   746.5981659  0.0001841 0.0233
 3029:  25 10 15  1 25 10 16  0               746.5983500   746.5984967 -0.0001467 -0.0005000 0.0000180   746.5981659  0.0001841 0.0233
 3030:  10  4  6  1 10  4  7  0               746.5983500   746.5979292  0.0004208 -0.0005000 0.0000180   746.5981659  0.0001841 0.0233
 3031:   7  4  3  1  7  4  4  0               746.5983500   746.5979966  0.0003534 -0.0005000 0.0000180   746.5981659  0.0001841 0.0233
 3032:  23  9 15  1 23  9 14  0               746.5983500   746.5974275  0.0009225 -0.0005000 0.0000180   746.5981659  0.0001841 0.0233
 3033:   3  3  1  1  3  3  0  0               746.5983500   746.5976733  0.0006767 -0.0005000 0.0000180   746.5981659  0.0001841 0.0233
 3034:   5  3  2  1  5  3  3  0               746.5983500   746.5977633  0.0005867 -0.0005000 0.0000180   746.5981659  0.0001841 0.0233
 3035:  10  5  5  1 10  5  6  0               746.5983500   746.5982985  0.0000515 -0.0005000 0.0000180   746.5981659  0.0001841 0.0233
 3036:  19  8 11  1 19  8 12  0               746.5983500   746.5987407 -0.0003907 -0.0005000 0.0000180   746.5981659  0.0001841 0.0233
 3037:  14  6  9  1 14  6  8  0               746.5983500   746.5977393  0.0006107 -0.0005000 0.0000180   746.5981659  0.0001841 0.0233
 3038:  16  7 10  1 16  7  9  0               746.5983500   746.5986803 -0.0003303 -0.0005000 0.0000180   746.5981659  0.0001841 0.0233
 3039:   9  5  5  1  9  5  4  0               746.5983500   746.5987923 -0.0004423 -0.0005000 0.0000180   746.5981659  0.0001841 0.0233
 3040:   9  5  4  1  9  5  5  0               746.5983500   746.5988147 -0.0004647 -0.0005000 0.0000180   746.5981659  0.0001841 0.0233
 3041:  10  5  6  1 10  5  5  0               746.5983500   746.5982315  0.0001185 -0.0005000 0.0000180   746.5981659  0.0001841 0.0233
 3042:  20  8 13  1 20  8 12  0               746.5983500   746.5976521  0.0006979 -0.0005000 0.0000180   746.5981659  0.0001841 0.0233
 3043:  14  6  8  1 14  6  9  0               746.5983500   746.5977984  0.0005516 -0.0005000 0.0000180   746.5981659  0.0001841 0.0233
 3044:   4  3  1  1  4  3  2  0               746.5983500   746.5976168  0.0007332 -0.0005000 0.0000180   746.5981659  0.0001841 0.0233
 3045:   5  4  1  1  5  4  2  0               746.5983500   746.5986191 -0.0002691 -0.0005000 0.0000180   746.5981659  0.0001841 0.0233
 3046:   7  4  4  1  7  4  3  0               746.5983500   746.5978333  0.0005167 -0.0005000 0.0000180   746.5981659  0.0001841 0.0233
 3047:   6  4  2  1  6  4  3  0               746.5983500   746.5983138  0.0000362 -0.0005000 0.0000180   746.5981659  0.0001841 0.0233
 3048:  16  5 11  1 16  5 12  0               746.5983500   746.5976629  0.0006871 -0.0005000 0.0000180   746.5981659  0.0001841 0.0233
 3049:  20  8 12  1 20  8 13  0               746.5983500   746.5976578  0.0006922 -0.0005000 0.0000180   746.5981659  0.0001841 0.0233
 3050:   2  2  0  1  2  2  1  0               746.5983500   746.5975078  0.0008422 -0.0005000 0.0000180   746.5981659  0.0001841 0.0233
 3051:  12  6  6  1 12  6  7  0               746.5997500   746.5992293  0.0005207 -0.0005000 0.0000189   746.5998902 -0.0001402 0.0345
 3052:   5  5  1  1  5  5  0  0               746.5997500   746.6004222 -0.0006722 -0.0005000 0.0000189   746.5998902 -0.0001402 0.0345
 3053:   3  2  1  1  3  2  2  0               746.5997500   746.5999681 -0.0002181 -0.0005000 0.0000189   746.5998902 -0.0001402 0.0345
 3054:   6  5  2  1  6  5  1  0               746.5997500   746.6000980 -0.0003480 -0.0005000 0.0000189   746.5998902 -0.0001402 0.0345
 3055:  17  5 12  1 17  5 13  0               746.5997500   746.5997601 -0.0000101 -0.0005000 0.0000189   746.5998902 -0.0001402 0.0345
 3056:  11  6  5  1 11  6  6  0               746.5997500   746.5998743 -0.0001243 -0.0005000 0.0000189   746.5998902 -0.0001402 0.0345
 3057:  24 10 15  1 24 10 14  0               746.5997500   746.5998642 -0.0001142 -0.0005000 0.0000189   746.5998902 -0.0001402 0.0345
 3058:  21  9 12  1 21  9 13  0               746.5997500   746.5998788 -0.0001288 -0.0005000 0.0000189   746.5998902 -0.0001402 0.0345
 3059:   8  5  3  1  8  5  4  0               746.5997500   746.5992919  0.0004581 -0.0005000 0.0000189   746.5998902 -0.0001402 0.0345
 3060:  27 11 16  1 27 11 17  0               746.5997500   746.5997157  0.0000343 -0.0005000 0.0000189   746.5998902 -0.0001402 0.0345
 3061:  18  8 11  1 18  8 10  0               746.5997500   746.5997700 -0.0000200 -0.0005000 0.0000189   746.5998902 -0.0001402 0.0345
 3062:  24 10 14  1 24 10 15  0               746.5997500   746.5998643 -0.0001143 -0.0005000 0.0000189   746.5998902 -0.0001402 0.0345
 3063:  11  6  6  1 11  6  5  0               746.5997500   746.5998714 -0.0001214 -0.0005000 0.0000189   746.5998902 -0.0001402 0.0345
 3064:  12  6  7  1 12  6  6  0               746.5997500   746.5992205  0.0005295 -0.0005000 0.0000189   746.5998902 -0.0001402 0.0345
 3065:  14  7  7  1 14  7  8  0               746.5997500   746.6003621 -0.0006121 -0.0005000 0.0000189   746.5998902 -0.0001402 0.0345
 3066:   7  3  4  1  7  3  5  0               746.5997500   746.6006196 -0.0008696 -0.0005000 0.0000189   746.5998902 -0.0001402 0.0345
 3067:  10  6  5  1 10  6  4  0               746.5997500   746.6004668 -0.0007168 -0.0005000 0.0000189   746.5998902 -0.0001402 0.0345
 3068:  10  6  4  1 10  6  5  0               746.5997500   746.6004676 -0.0007176 -0.0005000 0.0000189   746.5998902 -0.0001402 0.0345
 3069:  14  7  8  1 14  7  7  0               746.5997500   746.6003610 -0.0006110 -0.0005000 0.0000189   746.5998902 -0.0001402 0.0345
 3070:  27 11 17  1 27 11 16  0               746.5997500   746.5997157  0.0000343 -0.0005000 0.0000189   746.5998902 -0.0001402 0.0345
 3071:   7  5  3  1  7  5  2  0               746.5997500   746.5997195  0.0000305 -0.0005000 0.0000189   746.5998902 -0.0001402 0.0345
 3072:   6  5  1  1  6  5  2  0               746.5997500   746.6000982 -0.0003482 -0.0005000 0.0000189   746.5998902 -0.0001402 0.0345
 3073:   7  5  2  1  7  5  3  0               746.5997500   746.5997210  0.0000290 -0.0005000 0.0000189   746.5998902 -0.0001402 0.0345
 3074:  15  7  9  1 15  7  8  0               746.5997500   746.5995481  0.0002019 -0.0005000 0.0000189   746.5998902 -0.0001402 0.0345
 3075:   5  5  0  1  5  5  1  0               746.5997500   746.6004222 -0.0006722 -0.0005000 0.0000189   746.5998902 -0.0001402 0.0345
 3076:  21  9 13  1 21  9 12  0               746.5997500   746.5998785 -0.0001285 -0.0005000 0.0000189   746.5998902 -0.0001402 0.0345
 3077:  15  7  8  1 15  7  9  0               746.5997500   746.5995512  0.0001988 -0.0005000 0.0000189   746.5998902 -0.0001402 0.0345
 3078:  18  8 10  1 18  8 11  0               746.5997500   746.5997710 -0.0000210 -0.0005000 0.0000189   746.5998902 -0.0001402 0.0345
 3079:   8  5  4  1  8  5  3  0               746.5997500   746.5992854  0.0004646 -0.0005000 0.0000189   746.5998902 -0.0001402 0.0345
 3080:  11  7  5  1 11  7  4  0               746.6014900   746.6024749 -0.0009849 -0.0005000 0.0000212   746.6016008 -0.0001108 0.0345
 3081:  11  7  4  1 11  7  5  0               746.6014900   746.6024750 -0.0009850 -0.0005000 0.0000212   746.6016008 -0.0001108 0.0345
 3082:  12  4  8  1 12  4  9  0               746.6014900   746.6013694  0.0001206 -0.0005000 0.0000212   746.6016008 -0.0001108 0.0345
 3083:  20  9 11  1 20  9 12  0               746.6014900   746.6010231  0.0004669 -0.0005000 0.0000212   746.6016008 -0.0001108 0.0345
 3084:  13  7  7  1 13  7  6  0               746.6014900   746.6011196  0.0003704 -0.0005000 0.0000212   746.6016008 -0.0001108 0.0345
 3085:   6  6  0  1  6  6  1  0               746.6014900   746.6023069 -0.0008169 -0.0005000 0.0000212   746.6016008 -0.0001108 0.0345
 3086:  13  7  6  1 13  7  7  0               746.6014900   746.6011200  0.0003700 -0.0005000 0.0000212   746.6016008 -0.0001108 0.0345
 3087:  19  9 11  1 19  9 10  0               746.6014900   746.6021135 -0.0006235 -0.0005000 0.0000212   746.6016008 -0.0001108 0.0345
 3088:  12  7  6  1 12  7  5  0               746.6014900   746.6018242 -0.0003342 -0.0005000 0.0000212   746.6016008 -0.0001108 0.0345
 3089:  12  7  5  1 12  7  6  0               746.6014900   746.6018243 -0.0003343 -0.0005000 0.0000212   746.6016008 -0.0001108 0.0345
 3090:   9  6  4  1  9  6  3  0               746.6014900   746.6010078  0.0004822 -0.0005000 0.0000212   746.6016008 -0.0001108 0.0345
 3091:  17  8  9  1 17  8 10  0               746.6014900   746.6007480  0.0007420 -0.0005000 0.0000212   746.6016008 -0.0001108 0.0345
 3092:  16  8  9  1 16  8  8  0               746.6014900   746.6016712 -0.0001812 -0.0005000 0.0000212   746.6016008 -0.0001108 0.0345
 3093:  16  8  8  1 16  8  9  0               746.6014900   746.6016713 -0.0001813 -0.0005000 0.0000212   746.6016008 -0.0001108 0.0345
 3094:   6  6  1  1  6  6  0  0               746.6014900   746.6023069 -0.0008169 -0.0005000 0.0000212   746.6016008 -0.0001108 0.0345
 3095:   9  6  3  1  9  6  4  0               746.6014900   746.6010080  0.0004820 -0.0005000 0.0000212   746.6016008 -0.0001108 0.0345
 3096:  26 11 15  1 26 11 16  0               746.6014900   746.6012005  0.0002895 -0.0005000 0.0000212   746.6016008 -0.0001108 0.0345
 3097:   8  6  3  1  8  6  2  0               746.6014900   746.6014948 -0.0000048 -0.0005000 0.0000212   746.6016008 -0.0001108 0.0345
 3098:  26 11 16  1 26 11 15  0               746.6014900   746.6012005  0.0002895 -0.0005000 0.0000212   746.6016008 -0.0001108 0.0345
 3099:   8  6  2  1  8  6  3  0               746.6014900   746.6014948 -0.0000048 -0.0005000 0.0000212   746.6016008 -0.0001108 0.0345
 3100:  22 10 13  1 22 10 12  0               746.6014900   746.6024369 -0.0009469 -0.0005000 0.0000212   746.6016008 -0.0001108 0.0345
 3101:   7  6  1  1  7  6  2  0               746.6014900   746.6019278 -0.0004378 -0.0005000 0.0000212   746.6016008 -0.0001108 0.0345
 3102:   7  6  2  1  7  6  1  0               746.6014900   746.6019278 -0.0004378 -0.0005000 0.0000212   746.6016008 -0.0001108 0.0345
 3103:  22 10 12  1 22 10 13  0               746.6014900   746.6024370 -0.0009470 -0.0005000 0.0000212   746.6016008 -0.0001108 0.0345
 3104:  23 10 14  1 23 10 13  0               746.6014900   746.6011777  0.0003123 -0.0005000 0.0000212   746.6016008 -0.0001108 0.0345
 3105:  19  9 10  1 19  9 11  0               746.6014900   746.6021135 -0.0006235 -0.0005000 0.0000212   746.6016008 -0.0001108 0.0345
 3106:  20  9 12  1 20  9 11  0               746.6014900   746.6010230  0.0004670 -0.0005000 0.0000212   746.6016008 -0.0001108 0.0345
 3107:  17  8 10  1 17  8  9  0               746.6014900   746.6007476  0.0007424 -0.0005000 0.0000212   746.6016008 -0.0001108 0.0345
 3108:  23 10 13  1 23 10 14  0               746.6014900   746.6011777  0.0003123 -0.0005000 0.0000212   746.6016008 -0.0001108 0.0345
 3109:  27 12 15  1 27 12 16  0               746.6042300   746.6042315 -0.0000015 -0.0005000 0.0000238   746.6042159  0.0000141 0.0385
 3110:  20 10 11  1 20 10 10  0               746.6042300   746.6047925 -0.0005625 -0.0005000 0.0000238   746.6042159  0.0000141 0.0385
 3111:   7  7  1  1  7  7  0  0               746.6042300   746.6045376 -0.0003076 -0.0005000 0.0000238   746.6042159  0.0000141 0.0385
 3112:  27 12 16  1 27 12 15  0               746.6042300   746.6042315 -0.0000015 -0.0005000 0.0000238   746.6042159  0.0000141 0.0385
 3113:  13  8  5  1 13  8  6  0               746.6042300   746.6041182  0.0001118 -0.0005000 0.0000238   746.6042159  0.0000141 0.0385
 3114:  18  5 13  1 18  5 14  0               746.6042300   746.6037518  0.0004782 -0.0005000 0.0000238   746.6042159  0.0000141 0.0385
 3115:  12  8  4  1 12  8  5  0               746.6042300   746.6048257 -0.0005957 -0.0005000 0.0000238   746.6042159  0.0000141 0.0385
 3116:  12  8  5  1 12  8  4  0               746.6042300   746.6048257 -0.0005957 -0.0005000 0.0000238   746.6042159  0.0000141 0.0385
 3117:  24 11 14  1 24 11 13  0               746.6042300   746.6040064  0.0002236 -0.0005000 0.0000238   746.6042159  0.0000141 0.0385
 3118:   9  7  3  1  9  7  2  0               746.6042300   746.6036144  0.0006156 -0.0005000 0.0000238   746.6042159  0.0000141 0.0385
 3119:  24 11 13  1 24 11 14  0               746.6042300   746.6040064  0.0002236 -0.0005000 0.0000238   746.6042159  0.0000141 0.0385
 3120:  13  8  6  1 13  8  5  0               746.6042300   746.6041182  0.0001118 -0.0005000 0.0000238   746.6042159  0.0000141 0.0385
 3121:   8  3  5  1  8  3  6  0               746.6042300   746.6050225 -0.0007925 -0.0005000 0.0000238   746.6042159  0.0000141 0.0385
 3122:  21 10 11  1 21 10 12  0               746.6042300   746.6036419  0.0005881 -0.0005000 0.0000238   746.6042159  0.0000141 0.0385
 3123:  16  9  7  1 16  9  8  0               746.6042300   746.6050601 -0.0008301 -0.0005000 0.0000238   746.6042159  0.0000141 0.0385
 3124:  17  9  9  1 17  9  8  0               746.6042300   746.6041321  0.0000979 -0.0005000 0.0000238   746.6042159  0.0000141 0.0385
 3125:  14  8  7  1 14  8  6  0               746.6042300   746.6033566  0.0008734 -0.0005000 0.0000238   746.6042159  0.0000141 0.0385
 3126:  17  9  8  1 17  9  9  0               746.6042300   746.6041321  0.0000979 -0.0005000 0.0000238   746.6042159  0.0000141 0.0385
 3127:   9  7  2  1  9  7  3  0               746.6042300   746.6036144  0.0006156 -0.0005000 0.0000238   746.6042159  0.0000141 0.0385
 3128:  14  8  6  1 14  8  7  0               746.6042300   746.6033566  0.0008734 -0.0005000 0.0000238   746.6042159  0.0000141 0.0385
 3129:   8  7  2  1  8  7  1  0               746.6042300   746.6041030  0.0001270 -0.0005000 0.0000238   746.6042159  0.0000141 0.0385
 3130:   8  7  1  1  8  7  2  0               746.6042300   746.6041030  0.0001270 -0.0005000 0.0000238   746.6042159  0.0000141 0.0385
 3131:  16  9  8  1 16  9  7  0               746.6042300   746.6050601 -0.0008301 -0.0005000 0.0000238   746.6042159  0.0000141 0.0385
 3132:   7  7  0  1  7  7  1  0               746.6042300   746.6045376 -0.0003076 -0.0005000 0.0000238   746.6042159  0.0000141 0.0385
 3133:  20 10 10  1 20 10 11  0               746.6042300   746.6047925 -0.0005625 -0.0005000 0.0000238   746.6042159  0.0000141 0.0385
 3134:  21 10 12  1 21 10 11  0               746.6042300   746.6036419  0.0005881 -0.0005000 0.0000238   746.6042159  0.0000141 0.0385
 3135:  13  4  9  1 13  4 10  0               746.6064700   746.6059393  0.0005307 -0.0005000 0.0000268   746.6064450  0.0000250 0.0455
 3136:  14  9  5  1 14  9  6  0               746.6064700   746.6067532 -0.0002832 -0.0005000 0.0000268   746.6064450  0.0000250 0.0455
 3137:  22 11 11  1 22 11 12  0               746.6064700   746.6065939 -0.0001239 -0.0005000 0.0000268   746.6064450  0.0000250 0.0455
 3138:   9  8  2  1  9  8  1  0               746.6064700   746.6066229 -0.0001529 -0.0005000 0.0000268   746.6064450  0.0000250 0.0455
 3139:  25 12 14  1 25 12 13  0               746.6064700   746.6071643 -0.0006943 -0.0005000 0.0000268   746.6064450  0.0000250 0.0455
 3140:  25 12 13  1 25 12 14  0               746.6064700   746.6071643 -0.0006943 -0.0005000 0.0000268   746.6064450  0.0000250 0.0455
 3141:   8  8  1  1  8  8  0  0               746.6064700   746.6071133 -0.0006433 -0.0005000 0.0000268   746.6064450  0.0000250 0.0455
 3142:   4  2  2  1  4  2  3  0               746.6064700   746.6062419  0.0002281 -0.0005000 0.0000268   746.6064450  0.0000250 0.0455
 3143:  15  9  6  1 15  9  7  0               746.6064700   746.6059338  0.0005362 -0.0005000 0.0000268   746.6064450  0.0000250 0.0455
 3144:  18 10  8  1 18 10  9  0               746.6064700   746.6069304 -0.0004604 -0.0005000 0.0000268   746.6064450  0.0000250 0.0455
 3145:  22 11 12  1 22 11 11  0               746.6064700   746.6065939 -0.0001239 -0.0005000 0.0000268   746.6064450  0.0000250 0.0455
 3146:  10  8  2  1 10  8  3  0               746.6064700   746.6060781  0.0003919 -0.0005000 0.0000268   746.6064450  0.0000250 0.0455
 3147:  19 10 10  1 19 10  9  0               746.6064700   746.6058887  0.0005813 -0.0005000 0.0000268   746.6064450  0.0000250 0.0455
 3148:   9  8  1  1  9  8  2  0               746.6064700   746.6066229 -0.0001529 -0.0005000 0.0000268   746.6064450  0.0000250 0.0455
 3149:  10  8  3  1 10  8  2  0               746.6064700   746.6060781  0.0003919 -0.0005000 0.0000268   746.6064450  0.0000250 0.0455
 3150:  26 12 14  1 26 12 15  0               746.6064700   746.6057254  0.0007446 -0.0005000 0.0000268   746.6064450  0.0000250 0.0455
 3151:  18 10  9  1 18 10  8  0               746.6064700   746.6069304 -0.0004604 -0.0005000 0.0000268   746.6064450  0.0000250 0.0455
 3152:  19 10  9  1 19 10 10  0               746.6064700   746.6058887  0.0005813 -0.0005000 0.0000268   746.6064450  0.0000250 0.0455
 3153:  15  9  7  1 15  9  6  0               746.6064700   746.6059338  0.0005362 -0.0005000 0.0000268   746.6064450  0.0000250 0.0455
 3154:  14  9  6  1 14  9  5  0               746.6064700   746.6067532 -0.0002832 -0.0005000 0.0000268   746.6064450  0.0000250 0.0455
 3155:  26 12 15  1 26 12 14  0               746.6064700   746.6057254  0.0007446 -0.0005000 0.0000268   746.6064450  0.0000250 0.0455
 3156:   8  8  0  1  8  8  1  0               746.6064700   746.6071133 -0.0006433 -0.0005000 0.0000268   746.6064450  0.0000250 0.0455
 3157:  16 10  6  1 16 10  7  0               746.6094500   746.6088501  0.0005999 -0.0005000 0.0000320   746.6093883  0.0000617 0.0476
 3158:  19 11  9  1 19 11  8  0               746.6094500   746.6100644 -0.0006144 -0.0005000 0.0000320   746.6093883  0.0000617 0.0476
 3159:  11  9  3  1 11  9  2  0               746.6094500   746.6088849  0.0005651 -0.0005000 0.0000320   746.6093883  0.0000617 0.0476
 3160:  11  9  2  1 11  9  3  0               746.6094500   746.6088849  0.0005651 -0.0005000 0.0000320   746.6093883  0.0000617 0.0476
 3161:  24 12 12  1 24 12 13  0               746.6094500   746.6085481  0.0009019 -0.0005000 0.0000320   746.6093883  0.0000617 0.0476
 3162:   1  1  0  1  1  1  1  0               746.6094500   746.6099939 -0.0005439 -0.0005000 0.0000320   746.6093883  0.0000617 0.0476
 3163:  27 13 14  1 27 13 15  0               746.6094500   746.6091456  0.0003044 -0.0005000 0.0000320   746.6093883  0.0000617 0.0476
 3164:  20 11  9  1 20 11 10  0               746.6094500   746.6089624  0.0004876 -0.0005000 0.0000320   746.6093883  0.0000617 0.0476
 3165:  15 10  6  1 15 10  5  0               746.6094500   746.6097280 -0.0002780 -0.0005000 0.0000320   746.6093883  0.0000617 0.0476
 3166:  15 10  5  1 15 10  6  0               746.6094500   746.6097280 -0.0002780 -0.0005000 0.0000320   746.6093883  0.0000617 0.0476
 3167:  20 11 10  1 20 11  9  0               746.6094500   746.6089624  0.0004876 -0.0005000 0.0000320   746.6093883  0.0000617 0.0476
 3168:  27 13 15  1 27 13 14  0               746.6094500   746.6091456  0.0003044 -0.0005000 0.0000320   746.6093883  0.0000617 0.0476
 3169:  19 11  8  1 19 11  9  0               746.6094500   746.6100644 -0.0006144 -0.0005000 0.0000320   746.6093883  0.0000617 0.0476
 3170:  24 12 13  1 24 12 12  0               746.6094500   746.6085481  0.0009019 -0.0005000 0.0000320   746.6093883  0.0000617 0.0476
 3171:   9  9  1  1  9  9  0  0               746.6094500   746.6100334 -0.0005834 -0.0005000 0.0000320   746.6093883  0.0000617 0.0476
 3172:  10  9  1  1 10  9  2  0               746.6094500   746.6094864 -0.0000364 -0.0005000 0.0000320   746.6093883  0.0000617 0.0476
 3173:  16 10  7  1 16 10  6  0               746.6094500   746.6088501  0.0005999 -0.0005000 0.0000320   746.6093883  0.0000617 0.0476
 3174:  23 12 12  1 23 12 11  0               746.6094500   746.6098769 -0.0004269 -0.0005000 0.0000320   746.6093883  0.0000617 0.0476
 3175:  10  9  2  1 10  9  1  0               746.6094500   746.6094864 -0.0000364 -0.0005000 0.0000320   746.6093883  0.0000617 0.0476
 3176:   9  9  0  1  9  9  1  0               746.6094500   746.6100334 -0.0005834 -0.0005000 0.0000320   746.6093883  0.0000617 0.0476
 3177:  23 12 11  1 23 12 12  0               746.6094500   746.6098769 -0.0004269 -0.0005000 0.0000320   746.6093883  0.0000617 0.0476
 3178:  17 11  7  1 17 11  6  0               746.6127200   746.6121037  0.0006163 -0.0005000 0.0000366   746.6127635 -0.0000435 0.0526
 3179:  21 12 10  1 21 12  9  0               746.6127200   746.6123690  0.0003510 -0.0005000 0.0000366   746.6127635 -0.0000435 0.0526
 3180:  20 12  9  1 20 12  8  0               746.6127200   746.6135323 -0.0008123 -0.0005000 0.0000366   746.6127635 -0.0000435 0.0526
 3181:  24 13 12  1 24 13 11  0               746.6127200   746.6134887 -0.0007687 -0.0005000 0.0000366   746.6127635 -0.0000435 0.0526
 3182:  16 11  5  1 16 11  6  0               746.6127200   746.6130410 -0.0003210 -0.0005000 0.0000366   746.6127635 -0.0000435 0.0526
 3183:  17 11  6  1 17 11  7  0               746.6127200   746.6121037  0.0006163 -0.0005000 0.0000366   746.6127635 -0.0000435 0.0526
 3184:  10 10  1  1 10 10  0  0               746.6127200   746.6132966 -0.0005766 -0.0005000 0.0000366   746.6127635 -0.0000435 0.0526
 3185:  20 12  8  1 20 12  9  0               746.6127200   746.6135323 -0.0008123 -0.0005000 0.0000366   746.6127635 -0.0000435 0.0526
 3186:  25 13 12  1 25 13 13  0               746.6127200   746.6120965  0.0006235 -0.0005000 0.0000366   746.6127635 -0.0000435 0.0526
 3187:  12 10  2  1 12 10  3  0               746.6127200   746.6120335  0.0006865 -0.0005000 0.0000366   746.6127635 -0.0000435 0.0526
 3188:  16 11  6  1 16 11  5  0               746.6127200   746.6130410 -0.0003210 -0.0005000 0.0000366   746.6127635 -0.0000435 0.0526
 3189:  21 12  9  1 21 12 10  0               746.6127200   746.6123690  0.0003510 -0.0005000 0.0000366   746.6127635 -0.0000435 0.0526
 3190:  25 13 13  1 25 13 12  0               746.6127200   746.6120965  0.0006235 -0.0005000 0.0000366   746.6127635 -0.0000435 0.0526
 3191:  11 10  2  1 11 10  1  0               746.6127200   746.6126925  0.0000275 -0.0005000 0.0000366   746.6127635 -0.0000435 0.0526
 3192:  11 10  1  1 11 10  2  0               746.6127200   746.6126925  0.0000275 -0.0005000 0.0000366   746.6127635 -0.0000435 0.0526
 3193:  12 10  3  1 12 10  2  0               746.6127200   746.6120335  0.0006865 -0.0005000 0.0000366   746.6127635 -0.0000435 0.0526
 3194:   9  3  6  1  9  3  7  0               746.6127200   746.6131988 -0.0004788 -0.0005000 0.0000366   746.6127635 -0.0000435 0.0526
 3195:  10 10  0  1 10 10  1  0               746.6127200   746.6132966 -0.0005766 -0.0005000 0.0000366   746.6127635 -0.0000435 0.0526
 3196:  24 13 11  1 24 13 12  0               746.6127200   746.6134887 -0.0007687 -0.0005000 0.0000366   746.6127635 -0.0000435 0.0526
 3197:  25 14 11  1 25 14 12  0               746.6165300   746.6174271 -0.0008971 -0.0005000 0.0000448   746.6165452 -0.0000152 0.0625
 3198:  26 14 13  1 26 14 12  0               746.6165300   746.6159703  0.0005597 -0.0005000 0.0000448   746.6165452 -0.0000152 0.0625
 3199:  12 11  2  1 12 11  1  0               746.6165300   746.6162399  0.0002901 -0.0005000 0.0000448   746.6165452 -0.0000152 0.0625
 3200:  26 14 12  1 26 14 13  0               746.6165300   746.6159703  0.0005597 -0.0005000 0.0000448   746.6165452 -0.0000152 0.0625
 3201:  22 13 10  1 22 13  9  0               746.6165300   746.6161065  0.0004235 -0.0005000 0.0000448   746.6165452 -0.0000152 0.0625
 3202:  21 13  8  1 21 13  9  0               746.6165300   746.6173321 -0.0008021 -0.0005000 0.0000448   746.6165452 -0.0000152 0.0625
 3203:  18 12  6  1 18 12  7  0               746.6165300   746.6156931  0.0008369 -0.0005000 0.0000448   746.6165452 -0.0000152 0.0625
 3204:  21 13  9  1 21 13  8  0               746.6165300   746.6173321 -0.0008021 -0.0005000 0.0000448   746.6165452 -0.0000152 0.0625
 3205:  17 12  5  1 17 12  6  0               746.6165300   746.6166906 -0.0001606 -0.0005000 0.0000448   746.6165452 -0.0000152 0.0625
 3206:  18 12  7  1 18 12  6  0               746.6165300   746.6156931  0.0008369 -0.0005000 0.0000448   746.6165452 -0.0000152 0.0625
 3207:  12 11  1  1 12 11  2  0               746.6165300   746.6162399  0.0002901 -0.0005000 0.0000448   746.6165452 -0.0000152 0.0625
 3208:  17 12  6  1 17 12  5  0               746.6165300   746.6166906 -0.0001606 -0.0005000 0.0000448   746.6165452 -0.0000152 0.0625
 3209:  22 13  9  1 22 13 10  0               746.6165300   746.6161065  0.0004235 -0.0005000 0.0000448   746.6165452 -0.0000152 0.0625
 3210:  25 14 12  1 25 14 11  0               746.6165300   746.6174271 -0.0008971 -0.0005000 0.0000448   746.6165452 -0.0000152 0.0625
 3211:  11 11  1  1 11 11  0  0               746.6165300   746.6169020 -0.0003720 -0.0005000 0.0000448   746.6165452 -0.0000152 0.0625
 3212:  11 11  0  1 11 11  1  0               746.6165300   746.6169020 -0.0003720 -0.0005000 0.0000448   746.6165452 -0.0000152 0.0625
 3213:  13 12  2  1 13 12  1  0               746.6209000   746.6201274  0.0007726 -0.0005000 0.0000511   746.6208526  0.0000474 0.0625
 3214:  22 14  8  1 22 14  9  0               746.6209000   746.6214619 -0.0005619 -0.0005000 0.0000511   746.6208526  0.0000474 0.0625
 3215:  23 14  9  1 23 14 10  0               746.6209000   746.6201729  0.0007271 -0.0005000 0.0000511   746.6208526  0.0000474 0.0625
 3216:  12 12  1  1 12 12  0  0               746.6209000   746.6208482  0.0000518 -0.0005000 0.0000511   746.6208526  0.0000474 0.0625
 3217:  27 15 13  1 27 15 12  0               746.6209000   746.6201670  0.0007330 -0.0005000 0.0000511   746.6208526  0.0000474 0.0625
 3218:  13 12  1  1 13 12  2  0               746.6209000   746.6201274  0.0007726 -0.0005000 0.0000511   746.6208526  0.0000474 0.0625
 3219:  17 13  4  1 17 13  5  0               746.6209000   746.6216783 -0.0007783 -0.0005000 0.0000511   746.6208526  0.0000474 0.0625
 3220:  12 12  0  1 12 12  1  0               746.6209000   746.6208482  0.0000518 -0.0005000 0.0000511   746.6208526  0.0000474 0.0625
 3221:  18 13  6  1 18 13  5  0               746.6209000   746.6206752  0.0002248 -0.0005000 0.0000511   746.6208526  0.0000474 0.0625
 3222:  27 15 12  1 27 15 13  0               746.6209000   746.6201670  0.0007330 -0.0005000 0.0000511   746.6208526  0.0000474 0.0625
 3223:  26 15 11  1 26 15 12  0               746.6209000   746.6216897 -0.0007897 -0.0005000 0.0000511   746.6208526  0.0000474 0.0625
 3224:  18 13  5  1 18 13  6  0               746.6209000   746.6206752  0.0002248 -0.0005000 0.0000511   746.6208526  0.0000474 0.0625
 3225:  22 14  9  1 22 14  8  0               746.6209000   746.6214619 -0.0005619 -0.0005000 0.0000511   746.6208526  0.0000474 0.0625
 3226:  23 14 10  1 23 14  9  0               746.6209000   746.6201729  0.0007271 -0.0005000 0.0000511   746.6208526  0.0000474 0.0625
 3227:  26 15 12  1 26 15 11  0               746.6209000   746.6216897 -0.0007897 -0.0005000 0.0000511   746.6208526  0.0000474 0.0625
 3228:  17 13  5  1 17 13  4  0               746.6209000   746.6216783 -0.0007783 -0.0005000 0.0000511   746.6208526  0.0000474 0.0625
 3229:  19 14  6  1 19 14  5  0               746.6243900   746.6249929 -0.0006029 -0.0005000 0.0000565   746.6244060 -0.0000160 0.0833
 3230:  14 13  2  1 14 13  1  0               746.6243900   746.6243536  0.0000364 -0.0005000 0.0000565   746.6244060 -0.0000160 0.0833
 3231:  20 14  7  1 20 14  6  0               746.6243900   746.6238719  0.0005181 -0.0005000 0.0000565   746.6244060 -0.0000160 0.0833
 3232:  24 15 10  1 24 15  9  0               746.6243900   746.6245659 -0.0001759 -0.0005000 0.0000565   746.6244060 -0.0000160 0.0833
 3233:  13 13  1  1 13 13  0  0               746.6243900   746.6251340 -0.0007440 -0.0005000 0.0000565   746.6244060 -0.0000160 0.0833
 3234:  19 14  5  1 19 14  6  0               746.6243900   746.6249929 -0.0006029 -0.0005000 0.0000565   746.6244060 -0.0000160 0.0833
 3235:  13 13  0  1 13 13  1  0               746.6243900   746.6251340 -0.0007440 -0.0005000 0.0000565   746.6244060 -0.0000160 0.0833
 3236:  24 15  9  1 24 15 10  0               746.6243900   746.6245659 -0.0001759 -0.0005000 0.0000565   746.6244060 -0.0000160 0.0833
 3237:  14 13  1  1 14 13  2  0               746.6243900   746.6243536  0.0000364 -0.0005000 0.0000565   746.6244060 -0.0000160 0.0833
 3238:  15 13  3  1 15 13  2  0               746.6243900   746.6235175  0.0008725 -0.0005000 0.0000565   746.6244060 -0.0000160 0.0833
 3239:  20 14  6  1 20 14  7  0               746.6243900   746.6238719  0.0005181 -0.0005000 0.0000565   746.6244060 -0.0000160 0.0833
 3240:  15 13  2  1 15 13  3  0               746.6243900   746.6235175  0.0008725 -0.0005000 0.0000565   746.6244060 -0.0000160 0.0833
 3241:  20 15  5  1 20 15  6  0               746.6294400   746.6296419 -0.0002019 -0.0005000 0.0000634   746.6292114  0.0002286 0.1000
 3242:  21 15  7  1 21 15  6  0               746.6294400   746.6284574  0.0009826 -0.0005000 0.0000634   746.6292114  0.0002286 0.1000
 3243:  15 14  1  1 15 14  2  0               746.6294400   746.6289169  0.0005231 -0.0005000 0.0000634   746.6292114  0.0002286 0.1000
 3244:  21 15  6  1 21 15  7  0               746.6294400   746.6284574  0.0009826 -0.0005000 0.0000634   746.6292114  0.0002286 0.1000
 3245:  15 14  2  1 15 14  1  0               746.6294400   746.6289169  0.0005231 -0.0005000 0.0000634   746.6292114  0.0002286 0.1000
 3246:  20 15  6  1 20 15  5  0               746.6294400   746.6296419 -0.0002019 -0.0005000 0.0000634   746.6292114  0.0002286 0.1000
 3247:  25 16  9  1 25 16 10  0               746.6294400   746.6292832  0.0001568 -0.0005000 0.0000634   746.6292114  0.0002286 0.1000
 3248:  14 14  1  1 14 14  0  0               746.6294400   746.6297578 -0.0003178 -0.0005000 0.0000634   746.6292114  0.0002286 0.1000
 3249:  25 16 10  1 25 16  9  0               746.6294400   746.6292832  0.0001568 -0.0005000 0.0000634   746.6292114  0.0002286 0.1000
 3250:  14 14  0  1 14 14  1  0               746.6294400   746.6297578 -0.0003178 -0.0005000 0.0000634   746.6292114  0.0002286 0.1000
 3251:   3  1  2  1  2  1  1  0               746.9847400   746.9847122  0.0000278 -0.0005000 0.0000240
 3252:   7  1  6  1  7  0  7  0               747.0537000   747.0537627 -0.0000627 -0.0005000 0.0000225
 3253:   4  2  3  1  3  2  2  0               747.0874400   747.0873798  0.0000602 -0.0005000 0.0000234
 3254:   4  3  2  1  3  3  1  0               747.0900600   747.0901546 -0.0000946 -0.0005000 0.0000233
 3255:   4  2  2  1  3  2  1  0               747.0936900   747.0938718 -0.0001818 -0.0005000 0.0000234
 3256:   5  1  5  1  4  1  4  0               747.1725300   747.1730300 -0.0005000 -0.0005000 0.0000234
 3257:   4  2  2  1  4  1  3  0               747.1750400   747.1748168  0.0002232 -0.0005000 0.0000234
 3258:   6  0  6  1  5  1  5  0               747.1828800   747.1829682 -0.0000882 -0.0005000 0.0000229
 3259:  11  2  9  1 11  1 10  0               747.1965100   747.1964099  0.0001001 -0.0005000 0.0000218   747.1966776 -0.0001676 0.5000
 3260:   5  0  5  1  4  0  4  0               747.1965100   747.1969453 -0.0004353 -0.0005000 0.0000218   747.1966776 -0.0001676 0.5000
 3261:   5  2  4  1  4  2  3  0               747.2088700   747.2090141 -0.0001441 -0.0005000 0.0000230
 3262:   5  3  3  1  4  3  2  0               747.2141100   747.2135411  0.0005689 -0.0005000 0.0000228   747.2140487  0.0000613 0.2500
 3263:   5  4  2  1  4  4  1  0               747.2141100   747.2143468 -0.0002368 -0.0005000 0.0000228   747.2140487  0.0000613 0.2500
 3264:   5  4  1  1  4  4  0  0               747.2141100   747.2143507 -0.0002407 -0.0005000 0.0000228   747.2140487  0.0000613 0.2500
 3265:   5  3  2  1  4  3  1  0               747.2141100   747.2139564  0.0001536 -0.0005000 0.0000228   747.2140487  0.0000613 0.2500
 3266:   5  2  3  1  4  2  2  0               747.2223600   747.2217386  0.0006214 -0.0005000 0.0000230
 3267:   5  1  4  1  4  1  3  0               747.2413600   747.2409458  0.0004142 -0.0005000 0.0000233
 3268:   6  0  6  1  5  0  5  0               747.3106600   747.3106758 -0.0000158 -0.0005000 0.0000229
 3269:   6  5  2  1  5  5  1  0               747.3378900   747.3388652 -0.0009752 -0.0005000 0.0000223   747.3380563 -0.0001663 0.1667
 3270:   6  5  1  1  5  5  0  0               747.3378900   747.3388654 -0.0009754 -0.0005000 0.0000223   747.3380563 -0.0001663 0.1667
 3271:   6  3  3  1  5  3  2  0               747.3378900   747.3381992 -0.0003092 -0.0005000 0.0000223   747.3380563 -0.0001663 0.1667
 3272:   6  4  3  1  5  4  2  0               747.3378900   747.3376460  0.0002440 -0.0005000 0.0000223   747.3380563 -0.0001663 0.1667
 3273:   6  3  4  1  5  3  3  0               747.3378900   747.3370981  0.0007919 -0.0005000 0.0000223   747.3380563 -0.0001663 0.1667
 3274:   6  4  2  1  5  4  1  0               747.3378900   747.3376639  0.0002261 -0.0005000 0.0000223   747.3380563 -0.0001663 0.1667
 3275:   6  2  4  1  5  2  3  0               747.3514900   747.3515594 -0.0000694 -0.0005000 0.0000225
 3276:   7  1  7  1  6  1  6  0               747.3992000   747.3995447 -0.0003447 -0.0005000 0.0000208   747.3990195  0.0001805 0.3333
 3277:  15  3 12  1 15  2 13  0               747.3992000   747.3982240  0.0009760 -0.0005000 0.0000208   747.3990195  0.0001805 0.3333
 3278:  14  3 11  1 14  2 12  0               747.3992000   747.3992898 -0.0000898 -0.0005000 0.0000208   747.3990195  0.0001805 0.3333
 3279:  14  2 12  1 14  1 13  0               747.4080400   747.4081251 -0.0000851 -0.0005000 0.0000241
 3280:   6  1  6  1  5  0  5  0               747.4140300   747.4143617 -0.0003317 -0.0005000 0.0000205   747.4141235 -0.0000935 0.5000
 3281:  13  3 10  1 13  2 11  0               747.4140300   747.4138852  0.0001448 -0.0005000 0.0000205   747.4141235 -0.0000935 0.5000
 3282:  17  3 14  1 17  2 15  0               747.4453600   747.4453379  0.0000221 -0.0005000 0.0000291
 3283:   7  5  2  1  6  5  1  0               747.4614500   747.4620305 -0.0005805 -0.0005000 0.0000210   747.4614658 -0.0000158 0.1667
 3284:   7  5  3  1  6  5  2  0               747.4614500   747.4620298 -0.0005798 -0.0005000 0.0000210   747.4614658 -0.0000158 0.1667
 3285:   7  4  3  1  6  4  2  0               747.4614500   747.4612020  0.0002480 -0.0005000 0.0000210   747.4614658 -0.0000158 0.1667
 3286:   7  3  5  1  6  3  4  0               747.4614500   747.4607795  0.0006705 -0.0005000 0.0000210   747.4614658 -0.0000158 0.1667
 3287:  11  1 10  1 11  0 11  0               747.4614500   747.4616104 -0.0001604 -0.0005000 0.0000210   747.4614658 -0.0000158 0.1667
 3288:   7  4  4  1  6  4  3  0               747.4614500   747.4611426  0.0003074 -0.0005000 0.0000210   747.4614658 -0.0000158 0.1667
 3289:   7  3  4  1  6  3  3  0               747.4633500   747.4632331  0.0001169 -0.0005000 0.0000224   747.4635713 -0.0002213 0.3333
 3290:   7  6  2  1  6  6  1  0               747.4633500   747.4637405 -0.0003905 -0.0005000 0.0000224   747.4635713 -0.0002213 0.3333
 3291:   7  6  1  1  6  6  0  0               747.4633500   747.4637405 -0.0003905 -0.0005000 0.0000224   747.4635713 -0.0002213 0.3333
 3292:   8  2  7  1  8  1  8  0               747.4851200   747.4853015 -0.0001815 -0.0005000 0.0000214
 3293:   7  1  6  1  6  1  5  0               747.4932600   747.4928279  0.0004321 -0.0005000 0.0000225
 3294:  10  3  7  1 10  2  8  0               747.5075600   747.5076174 -0.0000574 -0.0005000 0.0000201
 3295:   8  0  8  1  7  0  7  0               747.5313300   747.5312603  0.0000697 -0.0005000 0.0000222
 3296:  19  3 16  1 19  2 17  0               747.5664000   747.5665759 -0.0001759 -0.0005000 0.0000334
 3297:   8  2  7  1  7  2  6  0               747.5704900   747.5699150  0.0005750 -0.0005000 0.0000214
 3298:  12  1 11  1 12  0 12  0               747.5850100   747.5848444  0.0001656 -0.0005000 0.0000203   747.5849847  0.0000253 0.1667
 3299:   8  5  3  1  7  5  2  0               747.5850100   747.5853347 -0.0003247 -0.0005000 0.0000203   747.5849847  0.0000253 0.1667
 3300:   8  4  5  1  7  4  4  0               747.5850100   747.5848662  0.0001438 -0.0005000 0.0000203   747.5849847  0.0000253 0.1667
 3301:   8  5  4  1  7  5  3  0               747.5850100   747.5853322 -0.0003222 -0.0005000 0.0000203   747.5849847  0.0000253 0.1667
 3302:   8  4  4  1  7  4  3  0               747.5850100   747.5850287 -0.0000187 -0.0005000 0.0000203   747.5849847  0.0000253 0.1667
 3303:   8  3  6  1  7  3  5  0               747.5850100   747.5845019  0.0005081 -0.0005000 0.0000203   747.5849847  0.0000253 0.1667
 3304:   8  3  5  1  7  3  4  0               747.5895300   747.5893352  0.0001948 -0.0005000 0.0000211
 3305:   8  1  8  1  7  0  7  0               747.5921400   747.5927840 -0.0006440 -0.0005000 0.0000225
 3306:   8  1  7  1  7  1  6  0               747.6165700   747.6163226  0.0002474 -0.0005000 0.0000221
 3307:   9  1  9  1  8  1  8  0               747.6233100   747.6231598  0.0001502 -0.0005000 0.0000225
 3308:   5  3  2  1  5  2  3  0               747.6392000   747.6400750 -0.0008750 -0.0005000 0.0000220   747.6396773 -0.0004773 0.5000
 3309:   9  0  9  1  8  0  8  0               747.6392000   747.6392796 -0.0000796 -0.0005000 0.0000220   747.6396773 -0.0004773 0.5000
 3310:   7  3  5  1  7  2  6  0               747.6758400   747.6767161 -0.0008761 -0.0005000 0.0000216
 3311:  19  4 15  1 19  3 16  0               747.6882900   747.6884437 -0.0001537 -0.0005000 0.0000206   747.6885044 -0.0002144 0.5000
 3312:   9  2  8  1  8  2  7  0               747.6882900   747.6885651 -0.0002751 -0.0005000 0.0000206   747.6885044 -0.0002144 0.5000
 3313:   9  4  6  1  8  4  5  0               747.7087300   747.7088355 -0.0001055 -0.0005000 0.0000202   747.7086213  0.0001087 0.1667
 3314:   9  5  4  1  8  5  3  0               747.7087300   747.7088074 -0.0000774 -0.0005000 0.0000202   747.7086213  0.0001087 0.1667
 3315:   9  5  5  1  8  5  4  0               747.7087300   747.7087994 -0.0000694 -0.0005000 0.0000202   747.7086213  0.0001087 0.1667
 3316:   9  3  7  1  8  3  6  0               747.7087300   747.7081493  0.0005807 -0.0005000 0.0000202   747.7086213  0.0001087 0.1667
 3317:   9  4  5  1  8  4  4  0               747.7087300   747.7092229 -0.0004929 -0.0005000 0.0000202   747.7086213  0.0001087 0.1667
 3318:   9  3  7  1  9  2  8  0               747.7087300   747.7079133  0.0008167 -0.0005000 0.0000202   747.7086213  0.0001087 0.1667
 3319:   9  7  2  1  8  7  1  0               747.7115700   747.7119324 -0.0003624 -0.0005000 0.0000246   747.7119324 -0.0003624 0.5000
 3320:   9  7  3  1  8  7  2  0               747.7115700   747.7119324 -0.0003624 -0.0005000 0.0000246   747.7119324 -0.0003624 0.5000
 3321:   9  3  6  1  8  3  5  0               747.7169900   747.7168114  0.0001786 -0.0005000 0.0000205
 3322:  10  1 10  1  9  1  9  0               747.7338800   747.7339765 -0.0000965 -0.0005000 0.0000226
 3323:   9  1  8  1  8  1  7  0               747.7376300   747.7376752 -0.0000452 -0.0005000 0.0000217
 3324:  10  0 10  1  9  0  9  0               747.7465500   747.7466384 -0.0000884 -0.0005000 0.0000222
 3325:  11  3  9  1 11  2 10  0               747.7615400   747.7616714 -0.0001314 -0.0005000 0.0000240   747.7617351 -0.0001951 0.5000
 3326:  21  3 18  1 21  2 19  0               747.7615400   747.7617988 -0.0002588 -0.0005000 0.0000240   747.7617351 -0.0001951 0.5000
 3327:  17  4 13  1 17  3 14  0               747.7740300   747.7737099  0.0003201 -0.0005000 0.0000224
 3328:  12  3 10  1 12  2 11  0               747.7979400   747.7984887 -0.0005487 -0.0005000 0.0000280   747.7983319 -0.0003919 0.5000
 3329:  25  4 21  1 25  3 22  0               747.7979400   747.7981752 -0.0002352 -0.0005000 0.0000280   747.7983319 -0.0003919 0.5000
 3330:  10  2  9  1  9  2  8  0               747.8064900   747.8062609  0.0002291 -0.0005000 0.0000203
 3331:  10  6  4  1  9  6  3  0               747.8328500   747.8332209 -0.0003709 -0.0005000 0.0000198   747.8330533 -0.0002033 0.1667
 3332:  10  5  5  1  9  5  4  0               747.8328500   747.8324804  0.0003696 -0.0005000 0.0000198   747.8330533 -0.0002033 0.1667
 3333:  10  4  6  1  9  4  5  0               747.8328500   747.8338859 -0.0010359 -0.0005000 0.0000198   747.8330533 -0.0002033 0.1667
 3334:  10  6  5  1  9  6  4  0               747.8328500   747.8332205 -0.0003705 -0.0005000 0.0000198   747.8330533 -0.0002033 0.1667
 3335:  10  5  6  1  9  5  5  0               747.8328500   747.8324581  0.0003919 -0.0005000 0.0000198   747.8330533 -0.0002033 0.1667
 3336:  10  4  7  1  9  4  6  0               747.8328500   747.8330541 -0.0002041 -0.0005000 0.0000198   747.8330533 -0.0002033 0.1667
 3337:  11  1 11  1 10  1 10  0               747.8445800   747.8442272  0.0003528 -0.0005000 0.0000231
 3338:  10  3  7  1  9  3  6  0               747.8459300   747.8459510 -0.0000210 -0.0005000 0.0000201
 3339:  11  0 11  1 10  0 10  0               747.8539200   747.8537934  0.0001266 -0.0005000 0.0000226
 3340:  10  1  9  1  9  1  8  0               747.8564900   747.8565090 -0.0000190 -0.0005000 0.0000212
 3341:  10  2  8  1  9  2  7  0               747.8807400   747.8805706  0.0001694 -0.0005000 0.0000219
 3342:  14  4 10  1 14  3 11  0               747.9211600   747.9217538 -0.0005938 -0.0005000 0.0000186
 3343:  11  2 10  1 10  2  9  0               747.9230900   747.9229514  0.0001386 -0.0005000 0.0000198
 3344:  12  0 12  1 11  1 11  0               747.9376300   747.9380192 -0.0003892 -0.0005000 0.0000235
 3345:  12  1 12  1 11  1 11  0               747.9543200   747.9539940  0.0003260 -0.0005000 0.0000202   747.9543172  0.0000028 0.5000
 3346:  11  3  9  1 10  3  8  0               747.9543200   747.9546404 -0.0003204 -0.0005000 0.0000202   747.9543172  0.0000028 0.5000
 3347:  25  5 20  1 25  4 21  0               747.9564700   747.9557691  0.0007009 -0.0005000 0.0000179   747.9565410 -0.0000710 0.1667
 3348:  11  5  6  1 10  5  5  0               747.9564700   747.9563887  0.0000813 -0.0005000 0.0000179   747.9565410 -0.0000710 0.1667
 3349:  11  4  8  1 10  4  7  0               747.9564700   747.9575058 -0.0010358 -0.0005000 0.0000179   747.9565410 -0.0000710 0.1667
 3350:  11  6  6  1 10  6  5  0               747.9564700   747.9566242 -0.0001542 -0.0005000 0.0000179   747.9565410 -0.0000710 0.1667
 3351:  11  6  5  1 10  6  4  0               747.9564700   747.9566252 -0.0001552 -0.0005000 0.0000179   747.9565410 -0.0000710 0.1667
 3352:  11  5  7  1 10  5  6  0               747.9564700   747.9563332  0.0001368 -0.0005000 0.0000179   747.9565410 -0.0000710 0.1667
 3353:  11  1 10  1 10  1  9  0               747.9725300   747.9725386 -0.0000086 -0.0005000 0.0000207
 3354:  11  3  8  1 10  3  7  0               747.9774900   747.9769486  0.0005414 -0.0005000 0.0000199   747.9769626  0.0005274 0.5000
 3355:  12  1 12  1 11  0 11  0               747.9774900   747.9769766  0.0005134 -0.0005000 0.0000199   747.9769626  0.0005274 0.5000
 3356:  27  4 23  1 27  3 24  0               747.9963900   747.9968294 -0.0004394 -0.0005000 0.0000285   747.9969283 -0.0005383 0.5000
 3357:  12  4  8  1 12  3  9  0               747.9963900   747.9970272 -0.0006372 -0.0005000 0.0000285   747.9969283 -0.0005383 0.5000
 3358:  11  2  9  1 10  2  8  0               748.0115700   748.0115514  0.0000186 -0.0005000 0.0000223
 3359:  12  2 11  1 11  2 10  0               748.0383100   748.0386095 -0.0002995 -0.0005000 0.0000195
[truncated: 1,020,841 more chars]
