# Supplementary material for: Rovibrational Spectroscopy of Trans and Cis Conformers of 2-Furfural from High-Resolution Fourier Transform and QCL Infrared Measurements
Source: Molecules. 2023 May 18;28(10):4165. doi: 10.3390/molecules28104165 (PMC10224235; doi:10.3390/molecules28104165)
Supplement: Supplementary file 1 [file molecules-28-04165-s001.zip › SuppMat_TableS2.txt]

					Rovibrational spectroscopy of trans- and cis- conformers of 2-furfural
			        	from high resolution Fourier transform and QCL infrared measurements

			 	Sathapana Chawananon, Pierre Asselin, Jordan A. Claus, Manuel Goubet, Anthony Roucou,
 					Robert Georges, Joanna Sobczuk, Colwyn Bracquart and Arnaud Cuisset} 


Table S2 : Line list of the ground state rotational transitions of cis-2-furfural measured by Motiyenko et al., fitted
           globally with the rovibrational lines of vibrational states v14=1 and v5=1 measured in the present study.
           el" and el' are used as flags for the initial and final vibrational states of the transitions
           (ground state:0, v14:1, v5:2)

--------------------------------------------------------------------------------------------------------------------------
         J'Ka'Kc'el' J" Ka"Kc"el"               Observed        Calc     Obs.-Calc. Exp.Error  Est.Error  Blend components
--------------------------------------------------------------------------------------------------------------------------
.
    1:   2  1  2  0  1  1  1  0                7105.34900    7105.33996    0.00904    0.02500   0.00005
    2:   2  0  2  0  1  0  1  0                7513.08800    7513.07159    0.01641    0.02500   0.00005
    3:   2  1  1  0  1  1  0  0                7965.00300    7965.03360   -0.03060    0.02500   0.00005
    4:   5  1  4  0  5  0  5  0               10072.25060   10072.25199   -0.00139    0.00200   0.00015
    5:   3  1  3  0  2  1  2  0               10644.51900   10644.51805    0.00095    0.00200   0.00008
    6:   3  0  3  0  2  0  2  0               11214.69460   11214.69180    0.00280    0.00200   0.00008
    7:   3  2  2  0  2  2  1  0               11302.76050   11302.76081   -0.00031    0.00200   0.00007
    8:   3  2  1  0  2  2  0  0               11390.84340   11390.84182    0.00158    0.00200   0.00007
    9:   6  1  5  0  6  0  6  0               11881.19710   11881.19756   -0.00046    0.00200   0.00021
   10:   3  1  2  0  2  1  1  0               11933.34100   11933.34130   -0.00030    0.00200   0.00008
   11:   2  1  2  0  1  0  1  0               13150.35550   13150.35341    0.00209    0.00200   0.00009
   12:   5  0  5  0  4  1  4  0               14029.27030   14029.26990    0.00040    0.00200   0.00014
   13:   7  1  6  0  7  0  7  0               14133.04590   14133.04543    0.00047    0.00200   0.00029
   14:   4  1  4  0  3  1  3  0               14168.48500   14168.48302    0.00198    0.00200   0.00010
   15:   4  0  4  0  3  0  3  0               14852.62170   14852.62082    0.00088    0.00200   0.00010
   16:   4  2  3  0  3  2  2  0               15053.11930   15053.11706    0.00224    0.00200   0.00010
   17:   4  3  2  0  3  3  1  0               15112.48030   15112.47991    0.00039    0.00200   0.00010
   18:   4  3  1  0  3  3  0  0               15116.74610   15116.74673   -0.00063    0.00200   0.00010
   19:   4  2  2  0  3  2  1  0               15270.82420   15270.82162    0.00258    0.00200   0.00010
   20:   7  2  5  0  7  1  6  0               15674.34620   15674.34731   -0.00111    0.00200   0.00018
   21:   4  1  3  0  3  1  2  0               15883.59020   15883.58800    0.00220    0.00200   0.00010
   22:   6  2  4  0  6  1  5  0               15932.71700   15932.71387    0.00313    0.00200   0.00019
   23:   3  1  3  0  2  0  2  0               16281.80000   16281.79986    0.00014    0.00200   0.00011
   24:   5  2  3  0  5  1  4  0               16408.07070   16408.06784    0.00286    0.00200   0.00020
   25:   4  2  2  0  4  1  3  0               17001.86600   17001.86486    0.00114    0.00200   0.00020
   26:   3  2  1  0  3  1  2  0               17614.62930   17614.63124   -0.00194    0.00200   0.00020
   27:   5  1  5  0  4  1  4  0               17673.73180   17673.73209   -0.00029    0.00200   0.00013
   28:   6  0  6  0  5  1  5  0               18244.16100   18244.15854    0.00246    0.02500   0.00016
   29:   5  0  5  0  4  0  4  0               18412.23900   18412.24015   -0.00115    0.00200   0.00013
   30:   5  2  4  0  4  2  3  0               18788.74600   18788.74797   -0.00197    0.00200   0.00012
   31:   5  3  3  0  4  3  2  0               18906.66100   18906.66215   -0.00115    0.00200   0.00012
   32:   5  3  2  0  4  3  1  0               18921.54000   18921.54181   -0.00181    0.00200   0.00012
   33:   5  2  3  0  4  2  2  0               19214.25500   19214.25519   -0.00019    0.00200   0.00013
   34:   4  1  4  0  3  0  3  0               19235.59000   19235.59107   -0.00107    0.00200   0.00013
   35:   5  1  4  0  4  1  3  0               19808.05500   19808.05222    0.00278    0.00200   0.00013
   36:   3  2  2  0  3  1  3  0               20082.78500   20082.79773   -0.01273    0.02500   0.00022
   37:   4  2  3  0  4  1  4  0               20967.43300   20967.43177    0.00123    0.02500   0.00023
   38:   6  1  6  0  5  1  5  0               21157.96800   21157.96797    0.00003    0.00200   0.00015
   39:   6  0  6  0  5  0  5  0               21888.62200   21888.62073    0.00127    0.02500   0.00015
   40:   5  1  5  0  4  0  4  0               22056.70100   22056.70234   -0.00134    0.02500   0.00016
   41:   5  2  4  0  5  1  5  0               22082.44400   22082.44766   -0.00366    0.02500   0.00024
   42:   7  0  7  0  6  1  6  0               22375.64000   22375.63976    0.00024    0.02500   0.00018
   43:   6  2  5  0  5  2  4  0               22506.08900   22506.08222    0.00678    0.02500   0.00015
   44:   6  3  3  0  5  3  2  0               22747.39300   22747.40021   -0.00721    0.02500   0.00015
   45:   6  2  4  0  5  2  3  0               23222.21500   23222.21234    0.00266    0.02500   0.00015
   46:   6  1  5  0  5  1  4  0               23697.56600   23697.56630   -0.00030    0.02500   0.00015
   47:   2  2  1  0  1  1  0  0               26100.04300   26100.04713   -0.00413    0.02500   0.00021
   48:   2  2  0  0  1  1  1  0               26552.02600   26552.01211    0.01389    0.02500   0.00021
   49:  13  9  4  0 12  9  3  0               49125.47900   49125.47653    0.00247    0.01500   0.00027
   50:  13  8  5  0 12  8  4  0               49153.11600   49153.13130   -0.01530    0.01500   0.00028
   51:  13  7  7  0 12  7  6  0               49193.71500   49193.72984   -0.01484    0.01500   0.00028   49193.73287   -0.01787 0.5000
   52:  13  7  6  0 12  7  5  0               49193.71500   49193.73591   -0.02091    0.01500   0.00028   49193.73287   -0.01787 0.5000
   53:  13  3 11  0 12  3 10  0               49238.70300   49238.70206    0.00094    0.01000   0.00029
   54:  13  6  8  0 12  6  7  0               49257.07000   49257.05370    0.01630    0.01500   0.00028
   55:  13  6  7  0 12  6  6  0               49257.37400   49257.37917   -0.00517    0.01500   0.00028
   56:  13  5  9  0 12  5  8  0               49360.49100   49360.50743   -0.01643    0.01500   0.00028
   57:  13  5  8  0 12  5  7  0               49371.27400   49371.28179   -0.00779    0.01500   0.00028
   58:  13  4 10  0 12  4  9  0               49482.77900   49482.77240    0.00660    0.01500   0.00029
   59:  13  4  9  0 12  4  8  0               49681.86600   49681.86233    0.00367    0.01500   0.00029
   60:  14  2 13  0 13  2 12  0               51268.79400   51268.80359   -0.00959    0.01500   0.00031
   61:  13  2 11  0 12  2 10  0               51419.17000   51419.17119   -0.00119    0.01000   0.00029
   62:  15  0 15  0 14  1 14  0               51593.48500   51593.48057    0.00443    0.01500   0.00034
   63:  15  1 15  0 14  1 14  0               51712.87300   51712.86890    0.00410    0.01500   0.00035
   64:  15  0 15  0 14  0 14  0               51774.48400   51774.48319    0.00081    0.01500   0.00035
   65:  15  1 15  0 14  0 14  0               51893.85800   51893.87152   -0.01352    0.01500   0.00035
   66:  15  1 14  0 14  2 13  0               52207.60700   52207.60349    0.00351    0.01500   0.00034
   67:  14  1 13  0 13  1 12  0               52332.16600   52332.16355    0.00245    0.01500   0.00032
   68:  14 10  4  0 13 10  3  0               52896.93500   52896.94176   -0.00676    0.01500   0.00029
   69:  14  9  5  0 13  9  4  0               52921.59300   52921.57698    0.01602    0.01500   0.00029
   70:  14  8  6  0 13  8  5  0               52956.11200   52956.10508    0.00692    0.01500   0.00029
   71:  14  3 12  0 13  3 11  0               52960.11100   52960.12928   -0.01828    0.01500   0.00030
   72:  14  7  8  0 13  7  7  0               53006.88600   53006.85636    0.02964    0.01500   0.00029   53006.86499    0.02101 0.5000
   73:  14  7  7  0 13  7  6  0               53006.88600   53006.87363    0.01237    0.01500   0.00029   53006.86499    0.02101 0.5000
   74:  14  6  9  0 13  6  8  0               53086.03000   53086.02201    0.00799    0.01500   0.00030
   75:  14  6  8  0 13  6  7  0               53086.79200   53086.79000    0.00200    0.01500   0.00030
   76:  14  5 10  0 13  5  9  0               53212.65100   53212.66275   -0.01175    0.01500   0.00030
   77:  14  5  9  0 13  5  8  0               53233.91400   53233.93425   -0.02025    0.01500   0.00030
   78:  14  4 11  0 13  4 10  0               53335.54200   53335.56262   -0.02062    0.01500   0.00030
   79:  14  4 10  0 13  4  9  0               53662.77700   53662.76412    0.01288    0.01500   0.00031
   80:  15  2 14  0 14  2 13  0               54729.34700   54729.36073   -0.01373    0.01500   0.00033
   81:  16  0 16  0 15  1 15  0               54980.77800   54980.76737    0.01063    0.01500   0.00036
   82:  14  3 11  0 13  3 10  0               54986.33700   54986.34242   -0.00542    0.01500   0.00032
   83:  16  1 16  0 15  1 15  0               55058.90900   55058.89977    0.00923    0.01000   0.00036
   84:  16  0 16  0 15  0 15  0               55100.16100   55100.15570    0.00530    0.01000   0.00036
   85:  16  1 16  0 15  0 15  0               55178.31200   55178.28810    0.02390    0.01500   0.00037
   86:  14  2 12  0 13  2 11  0               55231.71600   55231.72092   -0.00492    0.01500   0.00031
   87:  15  1 14  0 14  1 13  0               55599.00600   55599.01873   -0.01273    0.01500   0.00033
   88:  14  2 13  0 13  1 12  0               55723.59600   55723.57879    0.01721    0.01500   0.00042
   89:  16  1 15  0 15  2 14  0               56327.99400   56327.99447   -0.00047    0.01500   0.00034
   90:  15  5 11  0 14  5 10  0               57075.11300   57075.12251   -0.00951    0.01500   0.00031
   91:  15  5 10  0 14  5  9  0               57114.88300   57114.88584   -0.00284    0.01500   0.00031
   92:  15  4 12  0 14  4 11  0               57185.11300   57185.10452    0.00848    0.01500   0.00032
   93:  17  1 17  0 16  1 16  0               58401.98000   58401.98036   -0.00036    0.01000   0.00038
   94:  17  0 17  0 16  0 16  0               58429.33000   58429.32535    0.00465    0.01000   0.00038
   95:  17  1 17  0 16  0 16  0               58480.12000   58480.11276    0.00724    0.01500   0.00038
   96:  16  1 15  0 15  1 14  0               58849.74700   58849.75171   -0.00471    0.01000   0.00035
   97:  15  2 13  0 14  2 12  0               58952.39500   58952.39907   -0.00407    0.01000   0.00032
   98:  26  3 23  0 26  2 24  0               58956.85300   58956.84975    0.00325    0.01500   0.00141
   99:  18  2 16  0 17  3 15  0               59092.57400   59092.56210    0.01190    0.01500   0.00058
  100:  15  3 12  0 14  3 11  0               59171.57600   59171.55320    0.02280    0.01500   0.00034
  101:  25  6 19  0 25  5 20  0               59208.15200   59208.15442   -0.00242    0.01500   0.00088
  102:  45  8 37  0 45  7 38  0               59593.18300   59593.17491    0.00809    0.01500   0.00097
  103:  44  8 36  0 44  7 37  0               60144.30000   60144.29858    0.00142    0.01500   0.00092
  104:  25  5 21  0 25  4 22  0               60235.91500   60235.90413    0.01087    0.01500   0.00067
  105:  17  1 16  0 16  2 15  0               60263.90900   60263.92014   -0.01114    0.01500   0.00035
  106:  16  3 14  0 15  3 13  0               60308.14800   60308.14724    0.00076    0.01000   0.00033
  107:  16 15  1  0 15 15  0  0               60401.27400   60401.27392    0.00008    0.01000   0.00032
  108:  16 14  2  0 15 14  1  0               60411.84800   60411.84673    0.00127    0.01000   0.00031
  109:  16 13  3  0 15 13  2  0               60424.80200   60424.80672   -0.00472    0.01000   0.00031
  110:  16 12  4  0 15 12  3  0               60441.00200   60441.00599   -0.00399    0.01000   0.00031
  111:  16 11  5  0 15 11  4  0               60461.70500   60461.70919   -0.00419    0.01000   0.00031
  112:  16 10  6  0 15 10  5  0               60488.86300   60488.86094    0.00206    0.01000   0.00031
  113:  16  9  7  0 15  9  6  0               60525.57300   60525.58336   -0.01036    0.01000   0.00031
  114:  16  8  9  0 15  8  8  0               60577.17000   60577.16595    0.00405    0.01000   0.00032   60577.16710    0.00290 0.5000
  115:  16  8  8  0 15  8  7  0               60577.17000   60577.16825    0.00175    0.01000   0.00032   60577.16710    0.00290 0.5000
  116:  16  7 10  0 15  7  9  0               60653.23100   60653.17993    0.05107    0.01000   0.00032   60653.23478   -0.00378 0.5000
  117:  16  7  9  0 15  7  8  0               60653.23100   60653.28963   -0.05863    0.01000   0.00032   60653.23478   -0.00378 0.5000
  118:  16  2 15  0 15  1 14  0               60686.47600   60686.46375    0.01225    0.01500   0.00042
  119:  34  7 27  0 34  6 28  0               60716.74500   60716.74730   -0.00230    0.01500   0.00118
  120:  16  6 11  0 15  6 10  0               60771.36800   60771.36645    0.00155    0.01000   0.00032
  121:  16  6 10  0 15  6  9  0               60774.88600   60774.88650   -0.00050    0.01000   0.00032
  122:  16  5 12  0 15  5 11  0               60947.19100   60947.19158   -0.00058    0.01000   0.00033
  123:  16  5 11  0 15  5 10  0               61018.04300   61018.03816    0.00484    0.01000   0.00033
  124:  16  4 13  0 15  4 12  0               61026.35100   61026.35201   -0.00101    0.01000   0.00033
  125:  23  2 21  0 23  1 22  0               61077.12500   61077.12572   -0.00072    0.01500   0.00121
  126:  24  6 18  0 24  5 19  0               61079.46700   61079.48149   -0.01449    0.01500   0.00082
  127:  43  8 35  0 43  7 36  0               61467.71700   61467.71729   -0.00029    0.01500   0.00109
  128:  17  2 16  0 16  2 15  0               61578.11100   61578.11022    0.00078    0.01000   0.00036
  129:  18  0 18  0 17  1 17  0               61710.18200   61710.19097   -0.00897    0.01500   0.00039
  130:  18  1 18  0 17  1 17  0               61743.01300   61743.00877    0.00423    0.01000   0.00039
  131:  18  0 18  0 17  0 17  0               61760.97800   61760.97837   -0.00037    0.01000   0.00039
  132:  16  4 12  0 15  4 11  0               61793.08200   61793.08113    0.00087    0.01000   0.00034
  133:  18  1 18  0 17  0 17  0               61793.79400   61793.79618   -0.00218    0.01500   0.00039
  134:  26  5 22  0 26  4 23  0               61801.88700   61801.87302    0.01398    0.01500   0.00073
  135:  17  1 16  0 16  1 15  0               62100.63000   62100.63218   -0.00218    0.01000   0.00036
  136:  25  4 22  0 25  3 23  0               62261.45000   62261.44300    0.00700    0.01500   0.00095
  137:  35  5 30  0 35  4 31  0               62283.67500   62283.67184    0.00316    0.01500   0.00201
  138:  16  2 14  0 15  2 13  0               62573.02300   62573.02514   -0.00214    0.01000   0.00033
  139:  23  6 17  0 23  5 18  0               62682.12600   62682.13437   -0.00837    0.01500   0.00077
  140:  23  3 21  0 23  2 22  0               63047.90500   63047.90722   -0.00222    0.01500   0.00106
  141:  16  3 13  0 15  3 12  0               63322.58800   63322.58820   -0.00020    0.01000   0.00035
  142:  27  3 24  0 27  2 25  0               63332.17700   63332.18271   -0.00571    0.01500   0.00142
  143:  33  7 26  0 33  6 27  0               63332.72600   63332.71682    0.00918    0.01500   0.00118
  144:  17  2 16  0 16  1 15  0               63414.82100   63414.82227   -0.00127    0.01500   0.00041
  145:  31  4 27  0 31  3 28  0               63616.48700   63616.48360    0.00340    0.01500   0.00169
  146:  17  3 15  0 16  3 14  0               63930.13500   63930.14637   -0.01137    0.01000   0.00034
  147:  22  6 16  0 22  5 17  0               64010.17900   64010.18374   -0.00474    0.01500   0.00072
  148:  18  1 17  0 17  2 16  0               64046.81500   64046.81946   -0.00446    0.01500   0.00036
  149:  17 16  1  0 16 16  0  0               64174.78200   64174.78267   -0.00067    0.01000   0.00034
  150:  17 15  2  0 16 15  1  0               64185.23200   64185.23241   -0.00041    0.01000   0.00033
  151:  17 14  3  0 16 14  2  0               64197.84800   64197.84168    0.00632    0.01000   0.00033
  152:  17 13  4  0 16 13  3  0               64213.32000   64213.32059   -0.00059    0.01000   0.00032
  153:  17 12  5  0 16 12  4  0               64232.68900   64232.69249   -0.00349    0.01000   0.00032
  154:  17 11  6  0 16 11  5  0               64257.47600   64257.47692   -0.00092    0.01000   0.00032
  155:  21  2 20  0 21  1 21  0               64262.06500   64262.06818   -0.00318    0.01500   0.00113
  156:  17 10  7  0 16 10  6  0               64290.01100   64290.01258   -0.00158    0.01000   0.00032
  157:  17  9  8  0 16  9  7  0               64334.06000   64334.05963    0.00037    0.01000   0.00032
  158:  17  8 10  0 16  8  9  0               64396.00400   64396.00284    0.00116    0.01000   0.00033   64396.00588   -0.00188 0.5000
  159:  17  8  9  0 16  8  8  0               64396.00400   64396.00893   -0.00493    0.01000   0.00033   64396.00588   -0.00188 0.5000
  160:  17  7 11  0 16  7 10  0               64487.40400   64487.40028    0.00372    0.01000   0.00033
  161:  17  7 10  0 16  7  9  0               64487.64100   64487.65086   -0.00986    0.01000   0.00033
  162:  17  6 12  0 16  6 11  0               64628.85500   64628.85110    0.00390    0.01000   0.00034
  163:  17  6 11  0 16  6 10  0               64635.80700   64635.80687    0.00013    0.01000   0.00034
  164:  25  4 21  0 24  5 20  0               64763.59900   64763.60870   -0.00970    0.01500   0.00131
  165:  17  5 13  0 16  5 12  0               64827.51400   64827.51723   -0.00323    0.01000   0.00034
  166:  17  4 14  0 16  4 13  0               64853.89000   64853.88986    0.00014    0.01000   0.00034
  167:  24  2 22  0 24  1 23  0               64859.79300   64859.80328   -0.01028    0.01500   0.00123
  168:  17  5 12  0 16  5 11  0               64948.43000   64948.43056   -0.00056    0.01000   0.00034
  169:  18  2 17  0 17  2 16  0               64973.02500   64973.01773    0.00727    0.01000   0.00037
  170:  19  0 19  0 18  1 18  0               65061.53900   65061.53640    0.00260    0.01500   0.00040
  171:  19  1 19  0 18  1 18  0               65082.64000   65082.63221    0.00779    0.01000   0.00040
  172:  19  0 19  0 18  0 18  0               65094.35400   65094.35420   -0.00020    0.01000   0.00040
  173:  26  4 23  0 26  3 24  0               65111.28700   65111.28273    0.00427    0.01500   0.00102
  174:  19  1 19  0 18  0 18  0               65115.44900   65115.45001   -0.00101    0.01500   0.00040
  175:  18  1 17  0 17  1 16  0               65361.00500   65361.00954   -0.00454    0.01000   0.00038
  176:  28  5 24  0 28  4 25  0               65665.62200   65665.61629    0.00571    0.01500   0.00087
  177:  41  8 33  0 41  7 34  0               65902.65400   65902.67110   -0.01710    0.01500   0.00146
  178:  32  7 25  0 32  6 26  0               65925.66800   65925.65572    0.01228    0.01500   0.00115
  179:  17  4 13  0 16  4 12  0               65951.71300   65951.71611   -0.00311    0.01000   0.00036
  180:  17  2 15  0 16  2 14  0               66089.75400   66089.75550   -0.00150    0.01000   0.00035
  181:  24  3 22  0 24  2 23  0               66285.85400   66285.84482    0.00918    0.01500   0.00112
  182:  26  6 21  0 26  5 22  0               66830.66000   66830.64316    0.01684    0.01500   0.00063
  183:  20  6 15  0 20  5 16  0               67104.74400   67104.74156    0.00244    0.01500   0.00064
  184:  18  6 12  0 18  5 13  0               67117.40700   67117.41732   -0.01032    0.01500   0.00065
  185:  22  3 19  0 21  4 18  0               67195.55000   67195.54840    0.00160    0.01500   0.00094
  186:  27  6 22  0 27  5 23  0               67208.74100   67208.75017   -0.00917    0.01500   0.00064
  187:  19  6 14  0 19  5 15  0               67333.20500   67333.18549    0.01951    0.01500   0.00064
  188:  17  3 14  0 16  3 13  0               67416.16200   67416.16448   -0.00248    0.01000   0.00036
  189:  18  3 16  0 17  3 15  0               67516.15300   67516.14801    0.00499    0.01000   0.00035
  190:  17  6 11  0 17  5 12  0               67519.90400   67519.90155    0.00245    0.01500   0.00065
  191:  18  6 13  0 18  5 14  0               67561.54600   67561.54559    0.00041    0.01500   0.00064
  192:  28  3 25  0 28  2 26  0               67578.56900   67578.57217   -0.00317    0.01500   0.00142
  193:  22  2 21  0 22  1 22  0               67595.84000   67595.85190   -0.01190    0.01500   0.00119
  194:  19  1 18  0 18  2 17  0               67708.40300   67708.40693   -0.00393    0.01500   0.00037
  195:  17  6 12  0 17  5 13  0               67778.77200   67778.76379    0.00821    0.01500   0.00064
  196:  28  6 23  0 28  5 24  0               67780.68000   67780.67830    0.00170    0.01500   0.00066
  197:  16  6 10  0 16  5 11  0               67832.52700   67832.52524    0.00176    0.01500   0.00065
  198:  29  5 25  0 29  4 26  0               67945.48000   67945.48314   -0.00314    0.01500   0.00094
  199:  18 17  1  0 17 17  0  0               67948.12200   67948.12052    0.00148    0.01000   0.00035
  200:  18 16  2  0 17 16  1  0               67958.46900   67958.47871   -0.00971    0.01000   0.00035
  201:  18 15  3  0 17 15  2  0               67970.80300   67970.80580   -0.00280    0.01000   0.00034
  202:  16  6 11  0 16  5 12  0               67977.43800   67977.42992    0.00808    0.01500   0.00064
  203:  18 14  4  0 17 14  3  0               67985.70500   67985.70238    0.00262    0.01000   0.00033
  204:  18 13  5  0 17 13  4  0               68004.01200   68004.01233   -0.00033    0.01000   0.00033
  205:  18 12  6  0 17 12  5  0               68026.95200   68026.95220   -0.00020    0.01000   0.00033
  206:  18 11  7  0 17 11  6  0               68056.32800   68056.32971   -0.00171    0.01000   0.00033
  207:  18 10  8  0 17 10  7  0               68094.92600   68094.92993   -0.00393    0.01000   0.00033
  208:  27  4 24  0 27  3 25  0               68097.55600   68097.54565    0.01035    0.01500   0.00108
  209:  18  9  9  0 17  9  8  0               68147.23900   68147.23862    0.00038    0.01000   0.00033
  210:  15  6 10  0 15  5 11  0               68153.24500   68153.25504   -0.01004    0.01500   0.00064
  211:  18  8 11  0 17  8 10  0               68220.90000   68220.89139    0.00861    0.01000   0.00034   68220.89896    0.00104 0.5000
  212:  18  8 10  0 17  8  9  0               68220.90000   68220.90653   -0.00653    0.01000   0.00034   68220.89896    0.00104 0.5000
  213:  19  1 18  0 18  1 17  0               68634.60400   68634.60521   -0.00121    0.01000   0.00039
  214:  18  4 15  0 17  4 14  0               68662.24400   68662.24684   -0.00284    0.01000   0.00035
  215:  40  8 32  0 40  7 33  0               68688.63500   68688.64013   -0.00513    0.01500   0.00153
  216:  18  5 14  0 17  5 13  0               68713.97900   68713.98181   -0.00281    0.01000   0.00035
  217:  19  2 18  0 18  1 17  0               69278.99200   69279.00724   -0.01524    0.01500   0.00041
  218:  20  2 18  0 19  3 17  0               69442.10200   69442.09438    0.00762    0.01500   0.00050
  219:  18  2 16  0 17  2 15  0               69506.11000   69506.11090   -0.00090    0.01000   0.00036
  220:  25  3 23  0 25  2 24  0               69572.54600   69572.55341   -0.00741    0.01500   0.00118
  221:  30  6 25  0 30  5 26  0               69592.19300   69592.18877    0.00423    0.01500   0.00075
  222:  18  4 14  0 17  4 13  0               70167.76300   70167.74166    0.02134    0.01500   0.00038
  223:  30  5 26  0 30  4 27  0               70437.05700   70437.03971    0.01729    0.01500   0.00102
  224:  30  7 23  0 30  6 24  0               70579.79600   70579.79649   -0.00049    0.01500   0.00100
  225:  31  6 26  0 31  5 27  0               70862.49800   70862.49616    0.00184    0.01500   0.00081
  226:  19  3 17  0 18  3 16  0               71066.49500   71066.49278    0.00222    0.01000   0.00036
  227:  28  4 25  0 28  3 26  0               71197.33500   71197.34673   -0.01173    0.01500   0.00114
  228:  20  1 19  0 19  2 18  0               71277.16800   71277.18114   -0.01314    0.01500   0.00038
  229:  18  3 15  0 17  3 14  0               71434.58200   71434.58468   -0.00268    0.01000   0.00037
  230:  39  8 31  0 39  7 32  0               71621.25200   71621.24743    0.00457    0.01500   0.00152
  231:  29  3 26  0 29  2 27  0               71687.41800   71687.41340    0.00460    0.01500   0.00142
  232:  20  2 19  0 19  2 18  0               71720.60700   71720.60622    0.00078    0.01000   0.00039
  233:  19 18  1  0 18 18  0  0               71721.27200   71721.27503   -0.00303    0.01000   0.00038
  234:  19 17  2  0 18 17  1  0               71731.56500   71731.56802   -0.00302    0.01000   0.00036
  235:  19 16  3  0 18 16  2  0               71743.66900   71743.66807    0.00093    0.01000   0.00035
  236:  21  0 21  0 20  1 20  0               71750.72300   71750.74178   -0.01878    0.01500   0.00042
  237:  19 15  4  0 18 15  3  0               71758.08500   71758.08956   -0.00456    0.01000   0.00035
  238:  21  1 21  0 20  1 20  0               71759.34200   71759.34259   -0.00059    0.01000   0.00042
  239:  21  0 21  0 20  0 20  0               71764.24000   71764.23976    0.00024    0.01000   0.00042
  240:  21  1 21  0 20  0 20  0               71772.84600   71772.84057    0.00543    0.01500   0.00042
  241:  19 14  5  0 18 14  4  0               71775.54000   71775.53949    0.00051    0.01000   0.00034
  242:  19 13  6  0 18 13  5  0               71797.01200   71797.01163    0.00037    0.01000   0.00034
  243:  19 12  7  0 18 12  6  0               71823.93800   71823.93936   -0.00136    0.01000   0.00034
  244:  19 11  8  0 18 11  7  0               71858.45500   71858.45429    0.00071    0.01000   0.00034
  245:  19 10  9  0 18 10  8  0               71903.84300   71903.84464   -0.00164    0.01000   0.00034
  246:  20  1 19  0 19  1 18  0               71921.59200   71921.58317    0.00883    0.01000   0.00040
  247:  19  9 10  0 18  9  9  0               71965.40600   71965.41768   -0.01168    0.01000   0.00034
  248:  19  8 12  0 18  8 11  0               72052.25200   72052.23050    0.02150    0.01000   0.00035   72052.24830    0.00370 0.5000
  249:  19  8 11  0 18  8 10  0               72052.25200   72052.26609   -0.01409    0.01000   0.00035   72052.24830    0.00370 0.5000
  250:  26  2 24  0 26  1 25  0               72175.96900   72175.97070   -0.00170    0.01500   0.00130
  251:  19  7 13  0 18  7 12  0               72180.58600   72180.57892    0.00708    0.01000   0.00035
  252:  19  7 12  0 18  7 11  0               72181.69900   72181.69771    0.00129    0.01000   0.00035
  253:  26  4 22  0 25  5 21  0               72202.23200   72202.22206    0.00994    0.01500   0.00132
  254:  20  2 19  0 19  1 18  0               72365.00200   72365.00825   -0.00625    0.01500   0.00041
  255:  19  6 14  0 18  6 13  0               72375.28500   72375.28018    0.00482    0.01000   0.00036
  256:  32  6 27  0 32  5 28  0               72386.60900   72386.61388   -0.00488    0.01500   0.00088
  257:  19  6 13  0 18  6 12  0               72399.12300   72399.12064    0.00236    0.01000   0.00036
  258:  19  4 16  0 18  4 15  0               72446.21100   72446.20804    0.00296    0.01000   0.00036
  259:  29  7 22  0 29  6 23  0               72506.25000   72506.24253    0.00747    0.01500   0.00092
  260:  19  5 15  0 18  5 14  0               72603.64200   72603.64029    0.00171    0.01000   0.00036
  261:  19  2 17  0 18  2 16  0               72834.88000   72834.89507   -0.01507    0.01000   0.00037
  262:  19  5 14  0 18  5 13  0               72917.47200   72917.46899    0.00301    0.01000   0.00037
  263:  31  5 27  0 31  4 28  0               73120.28800   73120.26661    0.02139    0.01500   0.00109
  264:  28  7 21  0 28  6 22  0               74138.63000   74138.63212   -0.00212    0.01500   0.00086
  265:  33  6 28  0 33  5 29  0               74164.84200   74164.84721   -0.00521    0.01500   0.00096
  266:  21  2 19  0 20  3 18  0               74178.24400   74178.23611    0.00789    0.01500   0.00046
  267:  24  1 23  0 24  0 24  0               74198.24500   74198.25083   -0.00583    0.01500   0.00133
  268:  24  2 23  0 24  1 24  0               74287.47800   74287.45231    0.02569    0.01500   0.00132
  269:  19  4 15  0 18  4 14  0               74425.49700   74425.50091   -0.00391    0.01000   0.00040
  270:  38  8 30  0 38  7 31  0               74538.83400   74538.84169   -0.00769    0.01500   0.00146
  271:  30  5 25  0 29  6 24  0               74573.29800   74573.28802    0.00998    0.01500   0.00167
  272:  20  3 18  0 19  3 17  0               74582.53100   74582.53533   -0.00433    0.01000   0.00037
  273:  21  1 20  0 20  2 19  0               74776.92700   74776.91519    0.01181    0.01500   0.00039
  274:  21  2 20  0 20  2 19  0               75079.15000   75079.14934    0.00066    0.01000   0.00040
  275:  22  0 22  0 21  1 21  0               75091.49300   75091.49396   -0.00096    0.01500   0.00043
  276:  22  1 22  0 21  1 21  0               75096.94900   75096.95389   -0.00489    0.01000   0.00043
  277:  22  0 22  0 21  0 21  0               75100.09300   75100.09477   -0.00177    0.01000   0.00043
  278:  22  1 22  0 21  0 21  0               75105.55300   75105.55470   -0.00170    0.01500   0.00043
  279:  34  6 28  0 33  7 27  0               75120.22300   75120.23403   -0.01103    0.01500   0.00194
  280:  16  3 14  0 15  2 13  0               75146.18700   75146.18308    0.00392    0.01500   0.00065
  281:   5  5  1  0  4  4  0  0               75180.01100   75180.00055    0.01045    0.01500   0.00058   75180.01029    0.00071 0.5000
  282:   5  5  0  0  4  4  1  0               75180.01100   75180.02004   -0.00904    0.01500   0.00058   75180.01029    0.00071 0.5000
  283:  21  1 20  0 20  1 19  0               75220.34000   75220.34027   -0.00027    0.01000   0.00040
  284:  19  3 16  0 18  3 15  0               75364.47200   75364.47433   -0.00233    0.01000   0.00037
  285:  27  7 20  0 27  6 21  0               75492.42700   75492.43031   -0.00331    0.01500   0.00081
  286:  20 19  1  0 19 19  0  0               75494.23600   75494.23407    0.00193    0.01000   0.00040
  287:  20 18  2  0 19 18  1  0               75504.48400   75504.48433   -0.00033    0.01000   0.00038
  288:  20 17  3  0 19 17  2  0               75516.40200   75516.40256   -0.00056    0.01000   0.00037
  289:  21  2 20  0 20  1 19  0               75522.57000   75522.57442   -0.00442    0.01500   0.00042
  290:  20 16  4  0 19 16  3  0               75530.43400   75530.43410   -0.00010    0.01000   0.00036
  291:  20 15  5  0 19 15  4  0               75547.17800   75547.17939   -0.00139    0.01000   0.00035
  292:  20 14  6  0 19 14  5  0               75567.46500   75567.46400    0.00100    0.01000   0.00035
  293:  20 13  7  0 19 13  6  0               75592.44900   75592.44878    0.00022    0.01000   0.00034
  294:  20 12  8  0 19 12  7  0               75623.80800   75623.80920   -0.00120    0.01000   0.00034
  295:  20 11  9  0 19 11  8  0               75664.03400   75664.03922   -0.00522    0.01000   0.00034
  296:  30  3 27  0 30  2 28  0               75665.76300   75665.75498    0.00802    0.01500   0.00142
  297:  20 10 10  0 19 10  9  0               75716.99200   75716.99174    0.00026    0.01000   0.00035
  298:  27  2 25  0 27  1 26  0               75740.07500   75740.08467   -0.00967    0.01500   0.00134
  299:  20  9 12  0 19  9 11  0               75788.90000   75788.89914    0.00086    0.01000   0.00035   75788.90016   -0.00016 0.5000
  300:  20  9 11  0 19  9 10  0               75788.90000   75788.90118   -0.00118    0.01000   0.00035   75788.90016   -0.00016 0.5000
  301:  20  8 13  0 19  8 12  0               75890.47100   75890.43148    0.03952    0.01000   0.00035   75890.47123   -0.00023 0.5000
  302:  20  8 12  0 19  8 11  0               75890.47100   75890.51098   -0.03998    0.01000   0.00035   75890.47123   -0.00023 0.5000
  303:  32  5 28  0 32  4 29  0               75972.73900   75972.74242   -0.00342    0.01500   0.00116
  304:  20  7 14  0 19  7 13  0               76040.58700   76040.58472    0.00228    0.01000   0.00036
  305:  20  7 13  0 19  7 12  0               76042.79900   76042.79681    0.00219    0.01000   0.00036
  306:  20  2 18  0 19  2 17  0               76097.27700   76097.27799   -0.00099    0.01000   0.00039
  307:  34  6 29  0 34  5 30  0               76191.38100   76191.38784   -0.00684    0.01500   0.00104
  308:  20  4 17  0 19  4 16  0               76201.09500   76201.09509   -0.00009    0.01000   0.00037
  309:  27  3 25  0 27  2 26  0               76242.77500   76242.77056    0.00444    0.01500   0.00129
  310:  20  6 15  0 19  6 14  0               76264.27900   76264.28083   -0.00183    0.01000   0.00036
  311:  20  6 14  0 19  6 13  0               76305.98400   76305.98289    0.00111    0.01000   0.00037
  312:  20  5 16  0 19  5 15  0               76492.72300   76492.72476   -0.00176    0.01000   0.00037
  313:  17  3 15  0 16  2 14  0               76503.31100   76503.30430    0.00670    0.01500   0.00066
  314:  20  5 15  0 19  5 14  0               76972.00400   76972.02091   -0.01691    0.01000   0.00038
  315:  31  7 25  0 31  6 26  0               77291.69100   77291.68603    0.00497    0.01500   0.00072
  316:  30  7 24  0 30  6 25  0               77303.83700   77303.84146   -0.00446    0.01500   0.00071
  317:  37  8 29  0 37  7 30  0               77308.24600   77308.25374   -0.00774    0.01500   0.00136
  318:  32  7 26  0 32  6 27  0               77425.05100   77425.05017    0.00083    0.01500   0.00073
  319:  29  7 23  0 29  6 24  0               77432.43500   77432.44061   -0.00561    0.01500   0.00071
  320:  25  7 18  0 25  6 19  0               77496.01900   77496.01833    0.00067    0.01500   0.00074
  321:  34  4 30  0 34  3 31  0               77525.25000   77525.24019    0.00981    0.01500   0.00166
  322:  28  7 22  0 28  6 23  0               77649.13400   77649.12030    0.01370    0.01500   0.00071
  323:  30  4 27  0 30  3 28  0               77653.15400   77653.13853    0.01547    0.01500   0.00125
  324:  33  7 27  0 33  6 28  0               77732.36300   77732.35632    0.00668    0.01500   0.00076
  325:   9  4  5  0  8  3  6  0               77808.33500   77808.34447   -0.00947    0.01500   0.00050
  326:  27  7 21  0 27  6 22  0               77927.45600   77927.43963    0.01637    0.01500   0.00071
  327:  18  3 16  0 17  2 15  0               77929.71000   77929.69682    0.01318    0.01500   0.00066
  328:  21  3 19  0 20  3 18  0               78066.52600   78066.52541    0.00059    0.01000   0.00038
  329:  24  7 17  0 24  6 18  0               78221.11400   78221.11925   -0.00525    0.01500   0.00073
  330:  22  1 21  0 21  2 20  0               78226.45100   78226.44562    0.00538    0.01500   0.00040
  331:  34  7 28  0 34  6 29  0               78239.96200   78239.96470   -0.00270    0.01500   0.00080
  332:  26  7 20  0 26  6 21  0               78243.83600   78243.83778   -0.00178    0.01500   0.00071
  333:  22  2 21  0 21  2 20  0               78430.72900   78430.73761   -0.00861    0.01000   0.00041
  334:  23  1 23  0 22  1 22  0               78434.28100   78434.27953    0.00147    0.01000   0.00044
  335:  23  0 23  0 22  0 22  0               78436.28500   78436.28512   -0.00012    0.01000   0.00044
  336:  23  1 23  0 22  0 22  0               78439.74600   78439.73947    0.00653    0.01500   0.00044
  337:  35  6 30  0 35  5 31  0               78454.79800   78454.80907   -0.01107    0.01500   0.00113
  338:  22  1 21  0 21  1 20  0               78528.68200   78528.67976    0.00224    0.01000   0.00041
  339:  25  7 19  0 25  6 20  0               78578.28200   78578.27688    0.00512    0.01500   0.00071
  340:  22  2 20  0 21  3 19  0               78634.90800   78634.91198   -0.00398    0.01500   0.00043
  341:  20  4 16  0 19  4 15  0               78700.15300   78700.15661   -0.00361    0.01000   0.00041
  342:  22  2 21  0 21  1 20  0               78732.97400   78732.97175    0.00225    0.01500   0.00042
  343:  23  7 16  0 23  6 17  0               78807.90700   78807.90152    0.00548    0.01500   0.00072
  344:  24  7 18  0 24  6 19  0               78914.55000   78914.54934    0.00066    0.01500   0.00071
  345:   6  5  2  0  5  4  1  0               78953.61500   78953.52721    0.08779    0.01500   0.00058   78953.61528   -0.00028 0.5000
  346:   6  5  1  0  5  4  2  0               78953.61500   78953.70335   -0.08835    0.01500   0.00058   78953.61528   -0.00028 0.5000
  347:  20  3 17  0 19  3 16  0               79195.12900   79195.13081   -0.00181    0.01000   0.00038
  348:  23  7 17  0 23  6 18  0               79240.26800   79240.27113   -0.00313    0.01500   0.00071
  349:  28  2 26  0 28  1 27  0               79259.30000   79259.30273   -0.00273    0.01500   0.00138
  350:  21 20  1  0 20 20  0  0               79266.99700   79266.98577    0.01123    0.01000   0.00042
  351:  21 19  2  0 20 19  1  0               79277.21200   79277.21273   -0.00073    0.01000   0.00041
  352:  22  7 15  0 22  6 16  0               79284.55300   79284.55534   -0.00234    0.01500   0.00071
  353:  21 18  3  0 20 18  2  0               79288.98700   79288.98687    0.00013    0.01000   0.00039
  354:  21 17  4  0 20 17  3  0               79302.69100   79302.69742   -0.00642    0.01000   0.00038
  355:  21  2 19  0 20  2 18  0               79318.67200   79318.67706   -0.00506    0.01000   0.00040
  356:  21 16  5  0 20 16  4  0               79318.85600   79318.86029   -0.00429    0.01000   0.00037
  357:  21 15  6  0 20 15  5  0               79338.17300   79338.17127    0.00173    0.01000   0.00036
  358:  21 14  7  0 20 14  6  0               79361.58900   79361.58732    0.00168    0.01000   0.00035
  359:  21 13  8  0 20 13  7  0               79390.45400   79390.45476   -0.00076    0.01000   0.00035
  360:  21 12  9  0 20 12  8  0               79426.71900   79426.71815    0.00085    0.01000   0.00035
  361:  21 11 10  0 20 11  9  0               79473.28700   79473.27520    0.01180    0.01000   0.00035
  362:  19  3 17  0 18  2 16  0               79490.07800   79490.07869   -0.00069    0.01500   0.00064
  363:  31  3 28  0 31  2 29  0               79529.04700   79529.04984   -0.00284    0.01500   0.00143
  364:  21 10 11  0 20 10 10  0               79534.60600   79534.61037   -0.00437    0.01000   0.00035
  365:  22  7 16  0 22  6 17  0               79546.61000   79546.61765   -0.00765    0.01500   0.00071
  366:  27  4 23  0 26  5 22  0               79583.88000   79583.87418    0.00582    0.01500   0.00131
  367:  28  3 26  0 28  2 27  0               79607.70600   79607.68452    0.02148    0.01500   0.00135
  368:  21  9 13  0 20  9 12  0               79618.00800   79617.99708    0.01092    0.01000   0.00036   79617.99953    0.00847 0.5000
  369:  21  9 12  0 20  9 11  0               79618.00800   79618.00198    0.00602    0.01000   0.00036   79617.99953    0.00847 0.5000
  370:  21  7 14  0 21  6 15  0               79673.72700   79673.72120    0.00580    0.01500   0.00071
  371:  21  8 14  0 20  8 13  0               79736.00400   79735.91892    0.08508    0.01000   0.00036   79736.00384    0.00016 0.5000
  372:  21  8 13  0 20  8 12  0               79736.00400   79736.08875   -0.08475    0.01000   0.00036   79736.00384    0.00016 0.5000
  373:  24  3 21  0 23  4 20  0               79753.46500   79753.44959    0.01541    0.01500   0.00083
  374:  21  7 15  0 21  6 16  0               79827.86500   79827.87967   -0.01467    0.01500   0.00071
  375:  36  8 28  0 36  7 29  0               79834.88300   79834.88266    0.00034    0.01500   0.00124
  376:  21  7 15  0 20  7 14  0               79910.20200   79910.20080    0.00120    0.01000   0.00037
  377:  21  7 14  0 20  7 13  0               79914.40800   79914.41016   -0.00216    0.01000   0.00037
  378:  21  4 18  0 20  4 17  0               79922.99500   79922.99556   -0.00056    0.01000   0.00038
  379:  20  7 13  0 20  6 14  0               79993.09600   79993.09078    0.00522    0.01500   0.00071
  380:  20  7 14  0 20  6 15  0               80080.92300   80080.92187    0.00113    0.01500   0.00071
  381:  21  6 16  0 20  6 15  0               80163.24600   80163.24301    0.00299    0.01000   0.00037
  382:  21  6 15  0 20  6 14  0               80233.78000   80233.77975    0.00025    0.01000   0.00037
  383:  19  7 12  0 19  6 13  0               80256.28000   80256.27687    0.00313    0.01500   0.00071
  384:  19  7 13  0 19  6 14  0               80304.63100   80304.61799    0.01301    0.01500   0.00071
  385:  21  5 17  0 20  5 16  0               80376.72300   80376.72978   -0.00678    0.01000   0.00038
  386:  18  7 11  0 18  6 12  0               80473.68100   80473.69979   -0.01879    0.01500   0.00071
  387:  18  7 12  0 18  6 13  0               80499.31700   80499.31925   -0.00225    0.01500   0.00071
  388:  17  7 10  0 17  6 11  0               80653.36800   80653.37027   -0.00227    0.01500   0.00071
  389:  17  7 11  0 17  6 12  0               80666.38300   80666.39224   -0.00924    0.01500   0.00071
  390:  16  7  9  0 16  6 10  0               80801.54200   80801.52628    0.01572    0.01500   0.00072
  391:  16  7 10  0 16  6 11  0               80807.82400   80807.84306   -0.01906    0.01500   0.00072
  392:  15  7  8  0 15  6  9  0               80923.13200   80923.12314    0.00886    0.01500   0.00072
  393:  15  7  9  0 15  6 10  0               80926.04400   80926.02958    0.01442    0.01500   0.00072
  394:  10  4  7  0  9  3  6  0               80970.87000   80970.87144   -0.00144    0.01500   0.00051
  395:  31  4 28  0 31  3 29  0               80972.37800   80972.38895   -0.01095    0.01500   0.00130
  396:  26  2 25  0 26  1 26  0               80992.95600   80992.96520   -0.00920    0.01500   0.00147
  397:  21  5 16  0 20  5 15  0               81084.07000   81084.06803    0.00197    0.01000   0.00039
  398:  11  7  4  0 11  6  5  0               81215.66700   81215.63778    0.02922    0.01500   0.00073   81215.66941   -0.00241 0.5000
  399:  11  7  5  0 11  6  6  0               81215.66700   81215.70103   -0.03403    0.01500   0.00073   81215.66941   -0.00241 0.5000
  400:  20  3 18  0 19  2 17  0               81237.73500   81237.71894    0.01606    0.01500   0.00062
  401:  10  7  3  0 10  6  4  0               81253.97700   81253.98173   -0.00473    0.01500   0.00073   81253.99108   -0.01408 0.5000
  402:  10  7  4  0 10  6  5  0               81253.97700   81254.00043   -0.02343    0.01500   0.00073   81253.99108   -0.01408 0.5000
  403:   9  7  2  0  9  6  3  0               81282.77800   81282.76330    0.01470    0.01500   0.00073   81282.76565    0.01235 0.5000
  404:   9  7  3  0  9  6  4  0               81282.77800   81282.76800    0.01000    0.01500   0.00073   81282.76565    0.01235 0.5000
  405:   8  7  1  0  8  6  2  0               81303.75000   81303.74571    0.00429    0.01500   0.00073
  406:  22  3 20  0 21  3 19  0               81521.42600   81521.42673   -0.00073    0.01000   0.00039
  407:  23  1 22  0 22  2 21  0               81640.14100   81640.14781   -0.00681    0.01500   0.00041
  408:  10  4  6  0  9  3  7  0               81653.90200   81653.88949    0.01251    0.01500   0.00051
  409:  24  0 24  0 23  1 23  0               81769.23900   81769.23158    0.00742    0.01500   0.00045
  410:  24  1 24  0 23  1 23  0               81771.41600   81771.41033    0.00567    0.01000   0.00045
  411:  24  0 24  0 23  0 23  0               81772.68900   81772.68593    0.00307    0.01000   0.00045
  412:  24  1 24  0 23  0 23  0               81774.84800   81774.86468   -0.01668    0.01500   0.00045
  413:  23  2 22  0 22  2 21  0               81777.23400   81777.22668    0.00732    0.01000   0.00041
  414:  23  1 22  0 22  1 21  0               81844.44400   81844.43980    0.00420    0.01000   0.00042
  415:  35  4 31  0 35  3 32  0               81860.44600   81860.45422   -0.00822    0.01500   0.00164
  416:  23  2 22  0 22  1 21  0               81981.51300   81981.51867   -0.00567    0.01500   0.00042
  417:  35  8 27  0 35  7 28  0               82065.65100   82065.65748   -0.00648    0.01500   0.00112
  418:  34  5 30  0 34  4 31  0               82091.18900   82091.18406    0.00494    0.01500   0.00127
  419:  22  2 20  0 21  2 19  0               82523.20100   82523.20129   -0.00029    0.01000   0.00041
  420:  31  5 26  0 30  6 25  0               82631.71300   82631.72371   -0.01071    0.01500   0.00172
  421:   7  5  3  0  6  4  2  0               82723.88000   82723.86712    0.01288    0.01500   0.00059
  422:   7  5  2  0  6  4  3  0               82724.74900   82724.75136   -0.00236    0.01500   0.00059
  423:  29  2 27  0 29  1 28  0               82744.01700   82744.01273    0.00427    0.01500   0.00143
  424:  23  2 21  0 22  3 20  0               82842.82900   82842.82888    0.00012    0.01500   0.00041
  425:  21  3 18  0 20  3 17  0               82917.79800   82917.80001   -0.00201    0.01000   0.00038
  426:  21  4 17  0 20  4 16  0               82961.66400   82961.66630   -0.00230    0.01000   0.00042
  427:  39  7 32  0 38  8 31  0               82981.85600   82981.86755   -0.01155    0.01500   0.00241
  428:  44  9 35  0 44  8 36  0               82987.49300   82987.49416   -0.00116    0.01500   0.00204
  429:  22 21  1  0 21 21  0  0               83039.52500   83039.51843    0.00657    0.01500   0.00045
  430:  22 20  2  0 21 20  1  0               83049.73400   83049.73916   -0.00516    0.01500   0.00043
  431:  22 19  3  0 21 19  2  0               83061.40400   83061.40119    0.00281    0.01000   0.00041
  432:  22 18  4  0 21 18  3  0               83074.85500   83074.84754    0.00746    0.01000   0.00040
  433:  22 17  5  0 21 17  4  0               83090.52400   83090.52602   -0.00202    0.01000   0.00038
  434:  22 16  6  0 21 16  5  0               83109.02800   83109.03036   -0.00236    0.01000   0.00037
  435:  22 15  7  0 21 15  6  0               83131.16300   83131.16147    0.00153    0.01000   0.00036
  436:  22 14  8  0 21 14  7  0               83158.02900   83158.02140    0.00760    0.01000   0.00036
  437:  22 13  9  0 21 13  8  0               83191.16000   83191.16143   -0.00143    0.01000   0.00035
  438:  21  3 19  0 20  2 18  0               83206.96700   83206.96636    0.00064    0.01500   0.00058
  439:  22 12 10  0 21 12  9  0               83232.81300   83232.82413   -0.01113    0.01000   0.00035
  440:  22 11 11  0 21 11 10  0               83286.35400   83286.35554   -0.00154    0.01000   0.00035
  441:  32  3 29  0 32  2 30  0               83295.74200   83295.73768    0.00432    0.01500   0.00144
  442:  22 10 12  0 21 10 11  0               83356.93900   83356.94455   -0.00555    0.01000   0.00036
  443:  12  3  9  0 11  2 10  0               83426.52400   83426.53883   -0.01483    0.01500   0.00059
  444:  22  9 14  0 21  9 13  0               83453.03700   83453.03212    0.00488    0.01000   0.00036   83453.03774   -0.00074 0.5000
  445:  22  9 13  0 21  9 12  0               83453.03700   83453.04336   -0.00636    0.01000   0.00036   83453.03774   -0.00074 0.5000
  446:  22  8 15  0 21  8 14  0               83589.14400   83589.13073    0.01327    0.01500   0.00037
  447:  22  8 14  0 21  8 13  0               83589.46100   83589.47916   -0.01816    0.01500   0.00037
  448:  22  4 19  0 21  4 18  0               83608.92900   83608.93456   -0.00556    0.01000   0.00038
  449:  22  7 16  0 21  7 15  0               83789.86600   83789.86484    0.00116    0.01000   0.00037
  450:  22  7 15  0 21  7 14  0               83797.59900   83797.60066   -0.00166    0.01000   0.00037
  451:  23  3 21  0 22  3 20  0               84950.68000   84950.68925   -0.00925    0.01000   0.00040
  452:  25  0 25  0 24  1 24  0               85107.02000   85107.03367   -0.01367    0.01500   0.00045
  453:  25  1 25  0 24  1 24  0               85108.40600   85108.40402    0.00198    0.01000   0.00045
  454:  25  0 25  0 24  0 24  0               85109.20700   85109.21243   -0.00543    0.01000   0.00045
  455:  24  2 23  0 23  2 22  0               85120.07700   85120.06360    0.01340    0.01000   0.00042
  456:  24  1 23  0 23  1 22  0               85165.75700   85165.76223   -0.00523    0.01000   0.00042
  457:  24  2 23  0 23  1 22  0               85257.14200   85257.14247   -0.00047    0.01500   0.00043
  458:  22  5 17  0 21  5 16  0               85259.32300   85259.32545   -0.00245    0.01000   0.00041
  459:  35  5 31  0 35  4 32  0               85311.11100   85311.10949    0.00151    0.01500   0.00133
  460:  22  3 20  0 21  2 19  0               85409.72400   85409.71603    0.00797    0.01500   0.00055
  461:  11  4  7  0 10  3  8  0               85569.43600   85569.45467   -0.01867    0.01500   0.00052
  462:  25  3 22  0 24  4 21  0               85581.38500   85581.39241   -0.00741    0.01500   0.00075
  463:  23  2 21  0 22  2 20  0               85729.34300   85729.34362   -0.00062    0.01000   0.00041
  464:  30  2 28  0 30  1 29  0               86202.33900   86202.34758   -0.00858    0.01500   0.00149
  465:  30  3 28  0 30  2 29  0               86365.96900   86365.96889    0.00011    0.01500   0.00148
  466:   8  5  4  0  7  4  3  0               86488.00500   86488.01875   -0.01375    0.01500   0.00060
  467:   8  5  3  0  7  4  4  0               86491.27500   86491.27237    0.00263    0.01500   0.00060
  468:  22  3 19  0 21  3 18  0               86526.43500   86526.43389    0.00111    0.01000   0.00039
  469:  23 22  1  0 22 22  0  0               86811.81900   86811.82048   -0.00148    0.01000   0.00049
  470:  28  4 24  0 27  5 23  0               86816.95600   86816.97924   -0.02324    0.01500   0.00127
  471:  23 21  2  0 22 21  1  0               86822.03800   86822.05017   -0.01217    0.01000   0.00046
  472:  23 20  3  0 22 20  2  0               86833.62100   86833.62757   -0.00657    0.01000   0.00044
  473:  24  2 22  0 23  3 21  0               86840.56800   86840.57942   -0.01142    0.01500   0.00040
  474:  23 19  4  0 22 19  3  0               86846.86100   86846.85723    0.00377    0.01000   0.00042
  475:  23 18  5  0 22 18  4  0               86862.12800   86862.13132   -0.00332    0.01000   0.00040
  476:  23 17  6  0 22 17  5  0               86879.96400   86879.96196    0.00204    0.01000   0.00039
  477:  23 16  7  0 22 16  6  0               86901.02800   86901.02826   -0.00026    0.01000   0.00037
  478:  23 15  8  0 22 15  7  0               86926.24400   86926.24668   -0.00268    0.01000   0.00037
  479:  23 14  9  0 22 14  8  0               86956.87900   86956.87877    0.00023    0.01000   0.00036
  480:  33  3 30  0 33  2 31  0               86983.88700   86983.89511   -0.00811    0.01500   0.00147
  481:  23 13 10  0 22 13  9  0               86994.69900   86994.70164   -0.00264    0.01000   0.00036
  482:  23 12 11  0 22 12 10  0               87042.28900   87042.28674    0.00226    0.01000   0.00035
  483:  23 11 12  0 22 11 11  0               87103.47400   87103.47660   -0.00260    0.01000   0.00036
  484:  22  4 18  0 21  4 17  0               87180.16900   87180.17207   -0.00307    0.01000   0.00042
  485:  23 10 13  0 22 10 12  0               87184.24400   87184.24408   -0.00008    0.01000   0.00036
  486:  23  4 20  0 22  4 19  0               87256.99000   87256.98869    0.00131    0.01000   0.00039
  487:  23  9 15  0 22  9 14  0               87294.34400   87294.33659    0.00741    0.01000   0.00036   87294.34895   -0.00495 0.5000
  488:  23  9 14  0 22  9 13  0               87294.34400   87294.36131   -0.01731    0.01000   0.00036   87294.34895   -0.00495 0.5000
  489:  12  4  9  0 11  3  8  0               87444.15100   87444.15114   -0.00014    0.01500   0.00054
  490:  23  8 16  0 22  8 15  0               87450.52700   87450.51636    0.01064    0.01500   0.00037
  491:  23  8 15  0 22  8 14  0               87451.19200   87451.20558   -0.01358    0.01500   0.00037
  492:  23  7 17  0 22  7 16  0               87679.91800   87679.91836   -0.00036    0.01000   0.00038
  493:  37  8 30  0 37  7 31  0               87682.06400   87682.05635    0.00765    0.01500   0.00085
  494:  28  1 27  0 28  0 28  0               87684.26700   87684.26488    0.00212    0.01500   0.00164
  495:  23  7 16  0 22  7 15  0               87693.69000   87693.68837    0.00163    0.01000   0.00038
  496:  28  2 27  0 28  1 28  0               87701.02800   87701.03802   -0.01002    0.01500   0.00164
  497:  33  4 30  0 33  3 31  0               87721.14100   87721.14221   -0.00121    0.01500   0.00140
  498:  38  8 31  0 38  7 32  0               87742.37000   87742.37503   -0.00503    0.01500   0.00088
  499:  36  8 29  0 36  7 30  0               87773.33500   87773.33046    0.00454    0.01500   0.00082
  500:  23  3 21  0 22  2 20  0               87837.22800   87837.20399    0.02401    0.01500   0.00052
  501:  34  8 27  0 34  7 28  0               88293.79200   88293.79659   -0.00459    0.01500   0.00080
  502:  24  3 22  0 23  3 21  0               88357.99800   88358.00119   -0.00319    0.01000   0.00041
  503:  25  1 24  0 24  2 23  0               88399.79300   88399.78245    0.01055    0.01500   0.00042
  504:  40  8 33  0 40  7 34  0               88430.39700   88430.38948    0.00752    0.01500   0.00101
  505:  26  0 26  0 25  1 25  0               88444.43500   88444.43666   -0.00166    0.01500   0.00046
  506:  26  1 26  0 25  1 25  0               88445.29200   88445.29633   -0.00433    0.01000   0.00046
  507:  26  0 26  0 25  0 25  0               88445.80400   88445.80701   -0.00301    0.01000   0.00046
  508:  26  1 26  0 25  0 25  0               88446.65200   88446.66668   -0.01468    0.01500   0.00046
  509:  25  2 24  0 24  2 23  0               88460.34100   88460.34293   -0.00193    0.01000   0.00043
  510:  25  1 24  0 24  1 23  0               88491.17300   88491.16268    0.01032    0.01000   0.00043
  511:  25  2 24  0 24  1 23  0               88551.71400   88551.72316   -0.00916    0.01500   0.00043
  512:  33  8 26  0 33  7 27  0               88667.29200   88667.29232   -0.00032    0.01500   0.00079
  513:  24  2 22  0 23  2 21  0               88948.43300   88948.43979   -0.00679    0.01000   0.00042
  514:  32  8 25  0 32  7 26  0               89083.08000   89083.09234   -0.01234    0.01500   0.00078
  515:  41  8 34  0 41  7 35  0               89107.88600   89107.87476    0.01124    0.01500   0.00111
  516:  23  5 18  0 22  5 17  0               89498.39100   89498.39155   -0.00055    0.01000   0.00042
  517:  31  8 24  0 31  7 25  0               89520.34200   89520.34015    0.00185    0.01500   0.00078
  518:  12  4  8  0 11  3  9  0               89596.05100   89596.06654   -0.01554    0.01500   0.00053
  519:  31  2 29  0 31  1 30  0               89640.52500   89640.52341    0.00159    0.01500   0.00156
  520:  31  3 29  0 31  2 30  0               89751.57100   89751.57034    0.00066    0.01500   0.00155
  521:  29  8 21  0 29  7 22  0               89769.54800   89769.54470    0.00330    0.01500   0.00079
  522:  13  3 10  0 12  2 11  0               89960.04300   89960.05459   -0.01159    0.01500   0.00071
  523:  30  8 23  0 30  7 24  0               89961.86600   89961.86602   -0.00002    0.01500   0.00077
  524:  23  3 20  0 22  3 19  0               90019.79200   90019.79177    0.00023    0.01000   0.00039
  525:  42  8 35  0 42  7 36  0               90034.06600   90034.06393    0.00207    0.01500   0.00123
  526:   9  5  4  0  8  4  5  0               90251.44900   90251.45195   -0.00295    0.01500   0.00060
  527:  13  4 10  0 12  3  9  0               90300.98400   90300.99449   -0.01049    0.01500   0.00057
  528:  29  8 22  0 29  7 23  0               90394.21400   90394.21651   -0.00251    0.01500   0.00077
  529:  28  8 20  0 28  7 21  0               90410.18800   90410.18896   -0.00096    0.01500   0.00078
  530:  24  3 22  0 23  2 21  0               90465.86400   90465.86156    0.00244    0.01500   0.00049
  531:  24 23  1  0 23 23  0  0               90583.88100   90583.88044    0.00056    0.01000   0.00052
  532:  24 22  2  0 23 22  1  0               90594.13400   90594.13276    0.00124    0.01000   0.00049
  533:  24 21  3  0 23 21  2  0               90605.64600   90605.64948   -0.00348    0.01000   0.00046
  534:  34  3 31  0 34  2 32  0               90609.53600   90609.54553   -0.00953    0.01500   0.00150
  535:  24 20  4  0 23 20  3  0               90618.70300   90618.70273    0.00027    0.01000   0.00044
  536:  24 19  5  0 23 19  4  0               90633.63800   90633.63870   -0.00070    0.01000   0.00042
  537:  24 18  6  0 23 18  5  0               90650.90300   90650.90333   -0.00033    0.01000   0.00040
  538:  25  2 23  0 24  3 22  0               90668.11400   90668.10728    0.00672    0.01500   0.00040
  539:  24 17  7  0 23 17  6  0               90671.07700   90671.07900   -0.00200    0.01000   0.00039
  540:  24 16  8  0 23 16  7  0               90694.92800   90694.93824   -0.01024    0.01000   0.00038
  541:  32  5 27  0 31  6 26  0               90714.68000   90714.68716   -0.00716    0.01500   0.00173
  542:  24 15  9  0 23 15  8  0               90723.52400   90723.52399    0.00001    0.01000   0.00037
  543:  24 14 10  0 23 14  9  0               90758.27500   90758.27272    0.00228    0.01000   0.00036
  544:  24 13 11  0 23 13 10  0               90801.21800   90801.20942    0.00858    0.01000   0.00036
  545:  28  8 21  0 28  7 22  0               90807.44300   90807.44129    0.00171    0.01500   0.00076
  546:  24 12 12  0 23 12 11  0               90855.28400   90855.26760    0.01640    0.01500   0.00036
  547:  24  4 21  0 23  4 20  0               90866.34300   90866.34299    0.00001    0.01000   0.00039
  548:  24 11 13  0 23 11 12  0               90924.83800   90924.83829   -0.00029    0.01000   0.00036
  549:  27  8 19  0 27  7 20  0               90947.78800   90947.79271   -0.00471    0.01500   0.00077
  550:  24 10 15  0 23 10 14  0               91016.76500   91016.76408    0.00092    0.01000   0.00036   91016.76485    0.00015 0.5000
  551:  24 10 14  0 23 10 13  0               91016.76500   91016.76563   -0.00063    0.01000   0.00036   91016.76485    0.00015 0.5000
  552:  29  1 28  0 29  0 29  0               91043.48400   91043.48737   -0.00337    0.01500   0.00174
  553:  29  2 28  0 29  1 29  0               91054.40200   91054.40880   -0.00680    0.01500   0.00174
  554:  26  3 23  0 25  4 22  0               91057.76800   91057.77087   -0.00287    0.01500   0.00067
  555:  34  4 31  0 34  3 32  0               91129.38600   91129.36893    0.01707    0.01500   0.00145
  556:  24  9 16  0 23  9 15  0               91142.28200   91142.25524    0.02676    0.01000   0.00037   91142.28138    0.00062 0.5000
  557:  24  9 15  0 23  9 14  0               91142.28200   91142.30753   -0.02553    0.01000   0.00037   91142.28138    0.00062 0.5000
  558:  27  8 20  0 27  7 21  0               91194.71200   91194.70647    0.00553    0.01500   0.00076
  559:  43  8 36  0 43  7 37  0               91222.16800   91222.15681    0.01119    0.01500   0.00137
  560:  24  8 17  0 23  8 16  0               91320.53700   91320.53246    0.00454    0.01000   0.00037
  561:  24  8 16  0 23  8 15  0               91321.84300   91321.85105   -0.00805    0.01000   0.00037
  562:  23  4 19  0 22  4 18  0               91330.15000   91330.15205   -0.00205    0.01000   0.00042
  563:  26  8 18  0 26  7 19  0               91401.92800   91401.94291   -0.01491    0.01500   0.00076
  564:  41  9 32  0 41  8 33  0               91409.85800   91409.86222   -0.00422    0.01500   0.00146
  565:   6  6  1  0  5  5  0  0               91466.77500   91466.77090    0.00410    0.01500   0.00068   91466.77113    0.00387 0.5000
  566:   6  6  0  0  5  5  1  0               91466.77500   91466.77137    0.00363    0.01500   0.00068   91466.77113    0.00387 0.5000
  567:  26  8 19  0 26  7 20  0               91551.80200   91551.80754   -0.00554    0.01500   0.00076
  568:  24  7 18  0 23  7 17  0               91580.54500   91580.55096   -0.00596    0.01000   0.00038
  569:  24  7 17  0 23  7 16  0               91604.34700   91604.34925   -0.00225    0.01000   0.00038
  570:  25  3 23  0 24  3 22  0               91747.05200   91747.05152    0.00048    0.01000   0.00041
  571:  26  1 25  0 25  2 24  0               91758.95100   91758.94683    0.00417    0.01500   0.00043
  572:  27  0 27  0 26  1 26  0               91781.58400   91781.57057    0.01343    0.01500   0.00047
  573:  27  1 27  0 26  1 26  0               91782.10800   91782.10860   -0.00060    0.01000   0.00047
  574:  27  0 27  0 26  0 26  0               91782.42800   91782.43024   -0.00224    0.01000   0.00047
  575:  27  1 27  0 26  0 26  0               91782.95900   91782.96827   -0.00927    0.01500   0.00047
  576:  25  8 17  0 25  7 18  0               91787.92500   91787.92973   -0.00473    0.01500   0.00076
  577:  26  2 25  0 25  2 24  0               91798.87100   91798.87032    0.00068    0.01000   0.00043
  578:  26  1 25  0 25  1 24  0               91819.50600   91819.50730   -0.00130    0.01000   0.00043
  579:  26  2 25  0 25  1 24  0               91859.43100   91859.43080    0.00020    0.01500   0.00043
  580:  25  8 18  0 25  7 19  0               91876.65200   91876.64891    0.00309    0.01500   0.00076
  581:  24  6 19  0 23  6 18  0               91906.27200   91906.27275   -0.00075    0.01000   0.00039
  582:  24  5 20  0 23  5 19  0               91946.12000   91946.12004   -0.00004    0.01000   0.00039
  583:  36  6 30  0 35  7 29  0               91989.96800   91989.97361   -0.00561    0.01500   0.00221
  584:  24  8 16  0 24  7 17  0               92117.59400   92117.59046    0.00354    0.01500   0.00076
  585:  24  8 17  0 24  7 18  0               92168.74200   92168.74260   -0.00060    0.01500   0.00076
  586:  25  2 23  0 24  2 22  0               92185.52800   92185.52905   -0.00105    0.01000   0.00042
  587:  24  6 18  0 23  6 17  0               92191.13000   92191.13152   -0.00152    0.01000   0.00040
  588:  23  8 15  0 23  7 16  0               92400.09500   92400.08867    0.00633    0.01500   0.00076
  589:  22  8 14  0 22  7 15  0               92642.56600   92642.57146   -0.00546    0.01500   0.00076
  590:  22  8 15  0 22  7 16  0               92658.15800   92658.16310   -0.00510    0.01500   0.00076
  591:  44  8 37  0 44  7 38  0               92679.30300   92679.30093    0.00207    0.01500   0.00153
  592:  21  8 13  0 21  7 14  0               92850.69300   92850.69295    0.00005    0.01500   0.00076
  593:  21  8 14  0 21  7 15  0               92858.89400   92858.89721   -0.00321    0.01500   0.00076
  594:  20  8 12  0 20  7 13  0               93029.02300   93029.01436    0.00864    0.01500   0.00076
  595:  20  8 13  0 20  7 14  0               93033.16700   93033.17910   -0.01210    0.01500   0.00076
  596:  32  2 30  0 32  1 31  0               93063.22300   93063.21772    0.00528    0.01500   0.00163
  597:  32  3 30  0 32  2 31  0               93138.14500   93138.15546   -0.01046    0.01500   0.00162
  598:  19  8 11  0 19  7 12  0               93181.31200   93181.30018    0.01182    0.01500   0.00077
  599:  19  8 12  0 19  7 13  0               93183.32900   93183.33233   -0.00333    0.01500   0.00077
  600:  25  3 23  0 24  2 22  0               93264.45700   93264.47328   -0.01628    0.01500   0.00047
  601:  18  8 10  0 18  7 11  0               93310.72800   93310.73180   -0.00380    0.01500   0.00077
  602:  18  8 11  0 18  7 12  0               93311.69200   93311.68075    0.01125    0.01500   0.00077
  603:  24  3 21  0 23  3 20  0               93404.03500   93404.03268    0.00232    0.01000   0.00040
  604:  17  8  9  0 17  7 10  0               93420.08400   93420.05816    0.02584    0.01500   0.00077
  605:  17  8 10  0 17  7 11  0               93420.45400   93420.48000   -0.02600    0.01500   0.00077
  606:  16  8  8  0 16  7  9  0               93511.79100   93511.70010    0.09090    0.01500   0.00078   93511.78877    0.00223 0.5000
  607:  16  8  9  0 16  7 10  0               93511.79100   93511.87744   -0.08644    0.01500   0.00078   93511.78877    0.00223 0.5000
  608:  15  8  7  0 15  7  8  0               93587.84700   93587.82149    0.02551    0.01500   0.00078   93587.85645   -0.00945 0.5000
  609:  15  8  8  0 15  7  9  0               93587.84700   93587.89142   -0.04442    0.01500   0.00078   93587.85645   -0.00945 0.5000
  610:  14  8  6  0 14  7  7  0               93650.39200   93650.37730    0.01470    0.01500   0.00078   93650.39010    0.00190 0.5000
  611:  14  8  7  0 14  7  8  0               93650.39200   93650.40290   -0.01090    0.01500   0.00078   93650.39010    0.00190 0.5000
  612:  13  8  5  0 13  7  6  0               93701.15600   93701.14584    0.01016    0.01500   0.00078   93701.15014    0.00586 0.5000
  613:  13  8  6  0 13  7  7  0               93701.15600   93701.15443    0.00157    0.01500   0.00078   93701.15014    0.00586 0.5000
  614:  12  8  4  0 12  7  5  0               93741.76500   93741.75046    0.01454    0.01500   0.00079   93741.75175    0.01325 0.5000
  615:  12  8  5  0 12  7  6  0               93741.76500   93741.75304    0.01196    0.01500   0.00079   93741.75175    0.01325 0.5000
  616:  11  8  3  0 11  7  4  0               93773.67400   93773.67409   -0.00009    0.01500   0.00079
  617:  13  4  9  0 12  3 10  0               93787.61500   93787.61851   -0.00351    0.01500   0.00054
  618:  24  5 19  0 23  5 18  0               93793.78300   93793.78440   -0.00140    0.01000   0.00044
  619:  10  8  2  0 10  7  3  0               93798.25500   93798.26932   -0.01432    0.01500   0.00079
  620:  29  4 25  0 28  5 24  0               93813.68700   93813.68821   -0.00121    0.01500   0.00120
  621:   9  8  1  0  9  7  2  0               93816.76700   93816.76520    0.00180    0.01500   0.00080
  622:   8  8  0  0  8  7  1  0               93830.27400   93830.27205    0.00195    0.01500   0.00080
  623:  43  7 37  0 43  6 38  0               93842.12900   93842.12311    0.00589    0.01500   0.00174
  624:  10  5  6  0  9  4  5  0               93978.57100   93978.56082    0.01018    0.01500   0.00061
  625:  10  5  5  0  9  4  6  0               94004.04400   94004.04309    0.00091    0.01500   0.00061
  626:  35  3 32  0 35  2 33  0               94186.06100   94186.06124   -0.00024    0.01500   0.00154
  627:  25 24  1  0 24 24  0  0               94355.68900   94355.68693    0.00207    0.01000   0.00056
  628:  26  2 24  0 25  3 23  0               94362.36600   94362.36412    0.00188    0.01500   0.00041
  629:  25 23  2  0 24 23  1  0               94365.97600   94365.97431    0.00169    0.01000   0.00053
  630:  25 22  3  0 24 22  2  0               94377.45200   94377.45142    0.00058    0.01000   0.00050
  631:  25 21  4  0 24 21  3  0               94390.36000   94390.36287   -0.00287    0.01000   0.00047
  632:  25 20  5  0 24 20  4  0               94405.01500   94405.01640   -0.00140    0.01000   0.00044
  633:  30  2 29  0 30  1 30  0               94406.96000   94406.94856    0.01144    0.01500   0.00184
  634:  25 19  6  0 24 19  5  0               94421.80000   94421.80358   -0.00358    0.01000   0.00042
  635:  25  4 22  0 24  4 21  0               94437.27000   94437.29022   -0.02022    0.01500   0.00040
  636:  25 18  7  0 24 18  6  0               94441.22600   94441.22883   -0.00283    0.01000   0.00041
  637:  25 17  8  0 24 17  7  0               94463.95100   94463.95112   -0.00012    0.01000   0.00039
  638:  25 16  9  0 24 16  8  0               94490.84600   94490.84488    0.00112    0.01000   0.00038
  639:  25 15 10  0 24 15  9  0               94523.11500   94523.09108    0.02392    0.01500   0.00037
  640:  25 14 11  0 24 14 10  0               94562.31700   94562.31735   -0.00035    0.01000   0.00036
  641:  25 13 12  0 24 13 11  0               94610.82000   94610.82018   -0.00018    0.01000   0.00036
  642:  25 12 13  0 24 12 12  0               94671.92600   94671.93067   -0.00467    0.01000   0.00036
  643:  25 11 14  0 24 11 13  0               94750.64600   94750.64472    0.00128    0.01000   0.00036
  644:  25 10 16  0 24 10 15  0               94854.76800   94854.77045   -0.00245    0.01000   0.00036   94854.77219   -0.00419 0.5000
  645:  25 10 15  0 24 10 14  0               94854.76800   94854.77393   -0.00593    0.01000   0.00036   94854.77219   -0.00419 0.5000
  646:  25  9 17  0 24  9 16  0               94997.19600   94997.14648    0.04952    0.01000   0.00037   94997.19990   -0.00390 0.5000
  647:  25  9 16  0 24  9 15  0               94997.19600   94997.25331   -0.05731    0.01000   0.00037   94997.19990   -0.00390 0.5000
  648:  15  4 12  0 14  3 11  0               95040.39600   95040.39382    0.00218    0.01500   0.00064
  649:  27  1 26  0 26  2 25  0               95110.03600   95110.03144    0.00456    0.01500   0.00044
  650:  28  0 28  0 27  1 27  0               95118.52200   95118.51686    0.00514    0.01500   0.00048
  651:  28  1 28  0 27  1 27  0               95118.85400   95118.85284    0.00116    0.01000   0.00048
  652:  28  0 28  0 27  0 27  0               95119.05500   95119.05488    0.00012    0.01000   0.00048
  653:  28  1 28  0 27  0 27  0               95119.37900   95119.39087   -0.01187    0.01500   0.00048
  654:  26  3 24  0 25  3 23  0               95121.32300   95121.32988   -0.00688    0.01000   0.00042
  655:  27  2 26  0 26  2 25  0               95136.22600   95136.22418    0.00182    0.01000   0.00044
  656:  27  1 26  0 26  1 25  0               95149.95800   95149.95494    0.00306    0.01000   0.00044
  657:  27  2 26  0 26  1 25  0               95176.14100   95176.14767   -0.00667    0.01500   0.00044
  658:  25  8 18  0 24  8 17  0               95199.63300   95199.63454   -0.00154    0.01000   0.00038
  659:  25  8 17  0 24  8 16  0               95202.07300   95202.08103   -0.00803    0.01000   0.00038
  660:   7  6  2  0  6  5  1  0               95240.81200   95240.80733    0.00467    0.01500   0.00068   95240.80992    0.00208 0.5000
  661:   7  6  1  0  6  5  2  0               95240.81200   95240.81251   -0.00051    0.01500   0.00068   95240.80992    0.00208 0.5000
  662:  24  4 20  0 23  4 19  0               95391.88400   95391.88759   -0.00359    0.01000   0.00041
  663:  26  2 24  0 25  2 23  0               95441.31400   95441.30836    0.00564    0.01000   0.00043
  664:  39  9 30  0 39  8 31  0               95473.90800   95473.91401   -0.00601    0.01500   0.00115
  665:  25  7 19  0 24  7 18  0               95491.73200   95491.72823    0.00377    0.01000   0.00038
  666:  25  7 18  0 24  7 17  0               95531.73800   95531.74176   -0.00376    0.01000   0.00039
  667:  25  5 21  0 24  5 20  0               95757.11700   95757.11714   -0.00014    0.01000   0.00039
  668:  25  6 20  0 24  6 19  0               95827.99900   95828.00069   -0.00169    0.01000   0.00039
  669:  26  3 24  0 25  2 23  0               96200.28500   96200.27412    0.01088    0.01500   0.00046
  670:  25  6 19  0 24  6 18  0               96256.83300   96256.84268   -0.00968    0.01000   0.00041
  671:  33  2 31  0 33  1 32  0               96473.92700   96473.91713    0.00987    0.01500   0.00171
  672:  33  3 31  0 33  2 32  0               96524.22400   96524.22473   -0.00073    0.01500   0.00171
  673:  25  3 22  0 24  3 21  0               96694.28700   96694.28581    0.00119    0.01000   0.00041
  674:  44  7 38  0 44  6 39  0               96718.97200   96718.97948   -0.00748    0.01500   0.00186
  675:  38  9 29  0 38  8 30  0               97057.88600   97057.87132    0.01468    0.01500   0.00104
  676:  14  3 11  0 13  2 12  0               97166.20500   97166.19285    0.01215    0.01500   0.00086
  677:  11  5  7  0 10  4  6  0               97689.62200   97689.63284   -0.01084    0.01500   0.00061
  678:  11  5  6  0 10  4  7  0               97749.09300   97749.07507    0.01793    0.01500   0.00061
  679:  31  1 30  0 31  0 31  0               97753.96800   97753.95417    0.01383    0.01500   0.00195
  680:  31  2 30  0 31  1 31  0               97758.54800   97758.53368    0.01432    0.01500   0.00195
  681:  44  9 36  0 44  8 37  0               97831.15000   97831.15448   -0.00448    0.01500   0.00111
  682:  43  9 35  0 43  8 36  0               97840.44400   97840.43765    0.00635    0.01500   0.00104
  683:  27  2 25  0 26  3 24  0               97955.10100   97955.10315   -0.00215    0.01500   0.00041
  684:  26  4 23  0 25  4 22  0               97971.17000   97971.16961    0.00039    0.01000   0.00040
  685:  42  9 34  0 42  8 35  0               98007.23400   98007.23461   -0.00061    0.01500   0.00099
  686:  45  9 37  0 45  8 38  0               98008.29700   98008.31313   -0.01613    0.01500   0.00120
  687:  26 25  1  0 25 25  0  0               98127.23400   98127.22861    0.00539    0.01000   0.00060
  688:  25  5 20  0 24  5 19  0               98128.16900   98128.16974   -0.00074    0.01000   0.00045
  689:  26 24  2  0 25 24  1  0               98137.56300   98137.56247    0.00053    0.01000   0.00056
  690:  26 22  4  0 25 22  3  0               98161.81600   98161.81845   -0.00245    0.01000   0.00050
  691:  26 21  5  0 25 21  4  0               98176.23800   98176.23690    0.00110    0.01000   0.00047
  692:  26 20  6  0 25 20  5  0               98192.61800   98192.62047   -0.00247    0.01000   0.00045
  693:  26 19  7  0 25 19  6  0               98211.40600   98211.40993   -0.00393    0.01000   0.00043
  694:  26 18  8  0 25 18  7  0               98233.15900   98233.17324   -0.01424    0.01000   0.00041
  695:  26 17  9  0 25 17  8  0               98258.66600   98258.65259    0.01341    0.01000   0.00039
  696:  26 16 10  0 25 16  9  0               98288.83200   98288.83315   -0.00115    0.01000   0.00038
  697:  41  9 33  0 41  8 34  0               98301.87100   98301.86894    0.00206    0.01500   0.00096
  698:  26 15 11  0 25 15 10  0               98325.04300   98325.04619   -0.00319    0.01000   0.00037
  699:  26 14 12  0 25 14 11  0               98369.12800   98369.12773    0.00027    0.01000   0.00036
  700:  37  9 28  0 37  8 29  0               98390.32800   98390.32148    0.00652    0.01500   0.00097
  701:  26 13 13  0 25 13 12  0               98423.66800   98423.67091   -0.00291    0.01000   0.00036
  702:  28  1 27  0 27  2 26  0               98455.61200   98455.70095   -0.08895    0.01000   0.00048   98455.61897   -0.00697 0.2000
  703:  29  0 29  0 28  1 28  0               98455.61200   98455.32578    0.28622    0.01000   0.00048   98455.61897   -0.00697 0.2000
  704:  29  1 29  0 28  0 28  0               98455.61200   98455.87116   -0.25916    0.01000   0.00048   98455.61897   -0.00697 0.2000
  705:  29  1 29  0 28  1 28  0               98455.61200   98455.53517    0.07683    0.01000   0.00048   98455.61897   -0.00697 0.2000
  706:  29  0 29  0 28  0 28  0               98455.61200   98455.66177   -0.04977    0.01000   0.00048   98455.61897   -0.00697 0.2000
  707:  28  2 27  0 27  2 26  0               98472.79900   98472.81008   -0.01108    0.01000   0.00044
  708:  28  1 27  0 27  1 26  0               98481.89700   98481.89369    0.00331    0.01000   0.00044
  709:  27  3 25  0 26  3 24  0               98483.98300   98483.98177    0.00123    0.01000   0.00042
  710:  26 12 14  0 25 12 13  0               98492.44500   98492.44261    0.00239    0.01000   0.00036
  711:  28  2 27  0 27  1 26  0               98498.99300   98499.00282   -0.00982    0.01500   0.00044
  712:  26 11 15  0 25 11 14  0               98581.10700   98581.10482    0.00218    0.01000   0.00036
  713:  40  9 32  0 40  8 33  0               98695.21100   98695.21365   -0.00265    0.01500   0.00093
  714:  26 10 17  0 25 10 16  0               98698.53900   98698.53571    0.00329    0.01000   0.00036   98698.53949   -0.00049 0.5000
  715:  26 10 16  0 25 10 15  0               98698.53900   98698.54327   -0.00427    0.01000   0.00036   98698.53949   -0.00049 0.5000
  716:  27  2 25  0 26  2 24  0               98714.07300   98714.06891    0.00409    0.01000   0.00043
  717:  33  5 28  0 32  6 27  0               98720.37700   98720.35501    0.02199    0.01500   0.00172
  718:  26  9 18  0 25  9 17  0               98859.48500   98859.38333    0.10167    0.01500   0.00037   98859.48903   -0.00403 0.5000
  719:  26  9 17  0 25  9 16  0               98859.48500   98859.59472   -0.10972    0.01500   0.00037   98859.48903   -0.00403 0.5000
  720:   8  6  3  0  7  5  2  0               99013.09600   99013.07797    0.01803    0.01500   0.00068   99013.09358    0.00242 0.5000
  721:   8  6  2  0  7  5  3  0               99013.09600   99013.10918   -0.01318    0.01500   0.00068   99013.09358    0.00242 0.5000
  722:  26  8 19  0 25  8 18  0               99088.26200   99088.26287   -0.00087    0.01000   0.00038
  723:  26  8 18  0 25  8 17  0               99092.67300   99092.67516   -0.00216    0.01000   0.00038
  724:  39  9 31  0 39  8 32  0               99159.84000   99159.83763    0.00237    0.01500   0.00091
  725:  27  3 25  0 26  2 24  0               99242.94700   99242.94753   -0.00053    0.01500   0.00045
  726:  25  4 21  0 24  4 20  0               99350.74100   99350.73893    0.00207    0.01000   0.00041
  727:  26  7 20  0 25  7 19  0               99413.11000   99413.10425    0.00575    0.01000   0.00039
  728:  26  7 19  0 25  7 18  0               99478.66200   99478.66199    0.00001    0.01000   0.00039
  729:  36  9 27  0 36  8 28  0               99510.65700   99510.66244   -0.00544    0.01500   0.00092
  730:  26  5 22  0 25  5 21  0               99537.14200   99537.13850    0.00350    0.01000   0.00040
  731:  45  7 39  0 45  6 40  0               99757.60400   99757.62504   -0.02104    0.01500   0.00197
  732:  34  2 32  0 34  1 33  0               99875.21900   99875.20866    0.01034    0.01500   0.00180
  733:  34  3 32  0 34  2 33  0               99908.82500   99908.82022    0.00478    0.01500   0.00180
  734:  26  3 23  0 25  3 22  0               99913.68500   99913.66868    0.01632    0.01000   0.00042
  735:  37  9 29  0 37  8 30  0              100206.88400  100206.88757   -0.00357    0.01500   0.00087
  736:  26  6 20  0 25  6 19  0              100375.70000  100375.70685   -0.00685    0.01000   0.00042
  737:  35  9 26  0 35  8 27  0              100455.61800  100455.62269   -0.00469    0.01500   0.00088
  738:  30  4 26  0 29  5 25  0              100496.39500  100496.40679   -0.01179    0.01500   0.00110
  739:  19  4 16  0 18  3 15  0              100684.20900  100684.20000    0.00900    0.01500   0.00086
  740:  36  9 28  0 36  8 29  0              100749.74300  100749.74388   -0.00088    0.01500   0.00086
  741:  28  3 25  0 27  4 24  0              100953.27400  100953.25965    0.01435    0.01500   0.00053
  742:  34  9 25  0 34  8 26  0              101257.11600  101257.11476    0.00124    0.01500   0.00085
  743:  35  9 27  0 35  8 28  0              101285.13800  101285.13537    0.00263    0.01500   0.00085
  744:  12  5  8  0 11  4  7  0              101361.75500  101361.75393    0.00107    0.01500   0.00062
  745:  27  4 24  0 26  4 23  0              101470.24900  101470.24468    0.00432    0.01000   0.00041
  746:  28  2 26  0 27  3 25  0              101472.23700  101472.23313    0.00387    0.01500   0.00042
  747:  12  5  7  0 11  4  8  0              101488.81800  101488.81007    0.00793    0.01500   0.00062
  748:  20  4 17  0 19  3 16  0              101520.82600  101520.82076    0.00524    0.01500   0.00090
  749:  30  0 30  0 29  1 29  0              101792.20000  101792.02771    0.17229    0.01000   0.00051  101792.19753    0.00247 0.2500
  750:  30  1 30  0 29  0 29  0              101792.20000  101792.36735   -0.16735    0.01000   0.00051  101792.19753    0.00247 0.2500
  751:  30  1 30  0 29  1 29  0              101792.20000  101792.15796    0.04204    0.01000   0.00051  101792.19753    0.00247 0.2500
  752:  30  0 30  0 29  0 29  0              101792.20000  101792.23710   -0.03710    0.01000   0.00051  101792.19753    0.00247 0.2500
  753:  29  1 28  0 28  2 27  0              101797.77500  101797.77512   -0.00012    0.01500   0.00045
  754:  34  9 26  0 34  8 27  0              101802.17800  101802.17388    0.00412    0.01500   0.00084
  755:  29  2 28  0 28  2 27  0              101808.91000  101808.90595    0.00405    0.01000   0.00045
  756:  29  1 28  0 28  1 27  0              101814.88400  101814.88425   -0.00025    0.01000   0.00045
  757:  29  2 28  0 28  1 27  0              101826.01500  101826.01508   -0.00008    0.01500   0.00045
  758:  28  3 26  0 27  3 25  0              101837.72300  101837.72404   -0.00104    0.01000   0.00043
  759:  27 26  1  0 26 26  0  0              101898.49300  101898.49417   -0.00117    0.01500   0.00065
  760:  27 25  2  0 26 25  1  0              101908.88400  101908.88510   -0.00110    0.01000   0.00061
  761:  27 24  3  0 26 24  2  0              101920.34400  101920.33739    0.00661    0.01000   0.00057
  762:  27 23  4  0 26 23  3  0              101933.05700  101933.05176    0.00524    0.01000   0.00053
  763:  27 22  5  0 26 22  4  0              101947.27600  101947.27588    0.00012    0.01000   0.00050
  764:  27 21  6  0 26 21  5  0              101963.31500  101963.31820   -0.00320    0.01000   0.00047
  765:  27 20  7  0 26 20  6  0              101981.56500  101981.56688   -0.00188    0.01000   0.00045
  766:  28  2 26  0 27  2 25  0              102001.11300  102001.11175    0.00125    0.01000   0.00043
  767:  27 19  8  0 26 19  7  0              102002.50600  102002.51597   -0.00997    0.01000   0.00043
  768:  27 18  9  0 26 18  8  0              102026.80300  102026.80221    0.00079    0.01000   0.00041
  769:  27 17 10  0 26 17  9  0              102055.25700  102055.25795   -0.00095    0.01000   0.00039
  770:  27 16 11  0 26 16 10  0              102088.98900  102088.98849    0.00051    0.01000   0.00038
  771:  27 15 12  0 26 15 11  0              102129.49000  102129.48828    0.00172    0.01000   0.00037
  772:  27 14 13  0 26 14 12  0              102178.81900  102178.82007   -0.00107    0.01000   0.00036
  773:  27 13 14  0 26 13 13  0              102239.90100  102239.90044    0.00056    0.01000   0.00036
  774:  21  4 18  0 20  3 17  0              102248.69400  102248.68550    0.00850    0.01500   0.00093
  775:  33  9 25  0 33  8 26  0              102293.08600  102293.09374   -0.00774    0.01500   0.00083
  776:  27 12 15  0 26 12 14  0              102316.97300  102316.97317   -0.00017    0.01000   0.00036
  777:  28  3 26  0 27  2 25  0              102366.60200  102366.60266   -0.00066    0.01500   0.00045
  778:  27 11 16  0 26 11 15  0              102416.43600  102416.43315    0.00285    0.01000   0.00036
  779:  26  5 21  0 25  5 20  0              102475.20500  102475.20473    0.00027    0.01000   0.00046
  780:  32  9 23  0 32  8 24  0              102530.46200  102530.47714   -0.01514    0.01500   0.00082
  781:  27 10 18  0 26 10 17  0              102548.35200  102548.34334    0.00866    0.01000   0.00037  102548.35128    0.00072 0.5000
  782:  27 10 17  0 26 10 16  0              102548.35200  102548.35923   -0.00723    0.01000   0.00037  102548.35128    0.00072 0.5000
  783:  27  9 19  0 26  9 18  0              102729.37200  102729.35356    0.01844    0.01500   0.00037
  784:  27  9 18  0 26  9 17  0              102729.74600  102729.75964   -0.01364    0.01500   0.00037
  785:  32  9 24  0 32  8 25  0              102752.80000  102752.80535   -0.00535    0.01500   0.00082
  786:   9  6  4  0  8  5  3  0              102782.21000  102782.13930    0.07070    0.01500   0.00069  102782.20710    0.00290 0.5000
  787:   9  6  3  0  8  5  4  0              102782.21000  102782.27491   -0.06491    0.01500   0.00069  102782.20710    0.00290 0.5000
  788:  22  4 19  0 21  3 18  0              102939.81800  102939.82006   -0.00206    0.01500   0.00095
  789:  15  4 11  0 14  3 12  0              102949.07000  102949.06710    0.00290    0.01500   0.00059
  790:  27  8 20  0 26  8 19  0              102986.81800  102986.82089   -0.00289    0.01000   0.00038
  791:  27  8 19  0 26  8 18  0              102994.57200  102994.57126    0.00074    0.01000   0.00038
  792:  31  9 22  0 31  8 23  0              103040.52100  103040.52099    0.00001    0.01500   0.00082
  793:  27  3 24  0 26  3 23  0              103089.40100  103089.40187   -0.00087    0.01000   0.00043
  794:  31  9 23  0 31  8 24  0              103178.40900  103178.40755    0.00145    0.01500   0.00081
  795:  26  4 22  0 25  4 21  0              103195.72400  103195.73050   -0.00650    0.01000   0.00041
  796:  35  2 33  0 35  1 34  0              103269.01700  103269.01091    0.00609    0.01500   0.00190
  797:  27  5 23  0 26  5 22  0              103282.21500  103282.21308    0.00192    0.01000   0.00040
  798:  35  3 33  0 35  2 34  0              103291.35200  103291.36855   -0.01655    0.01500   0.00190
  799:  27  7 21  0 26  7 20  0              103343.91400  103343.92196   -0.00796    0.01000   0.00039
  800:  27  7 20  0 26  7 19  0              103448.73500  103448.72146    0.01354    0.01000   0.00040
  801:  30  9 22  0 30  8 23  0              103568.71600  103568.70863    0.00737    0.01500   0.00081
  802:  27  6 22  0 26  6 21  0              103660.32200  103660.32010    0.00190    0.01000   0.00040
  803:  23  4 20  0 22  3 19  0              103670.36400  103670.37486   -0.01086    0.01500   0.00094
  804:  29  9 20  0 29  8 21  0              103873.96800  103873.96089    0.00711    0.01500   0.00080
  805:  29  9 21  0 29  8 22  0              103923.77900  103923.79023   -0.01123    0.01500   0.00080
  806:  28  9 19  0 28  8 20  0              104215.65500  104215.65750   -0.00250    0.01500   0.00080
  807:  28  9 20  0 28  8 21  0              104244.64500  104244.63416    0.01084    0.01500   0.00080
  808:  33  1 32  0 33  0 33  0              104456.81200  104456.80803    0.00397    0.01500   0.00221
  809:  33  2 32  0 33  1 33  0              104458.70800  104458.70359    0.00441    0.01500   0.00221
  810:  27  9 18  0 27  8 19  0              104516.35200  104516.36496   -0.01296    0.01500   0.00080
  811:  24  4 21  0 23  3 20  0              104516.93000  104516.92609    0.00391    0.01500   0.00092
  812:  27  9 19  0 27  8 20  0              104532.82200  104532.81922    0.00278    0.01500   0.00080
  813:  27  6 21  0 26  6 20  0              104555.26700  104555.26462    0.00238    0.01000   0.00043
  814:  26  9 17  0 26  8 18  0              104781.18100  104781.17658    0.00442    0.01500   0.00080
  815:  26  9 18  0 26  8 19  0              104790.28400  104790.28655   -0.00255    0.01500   0.00080
  816:  29  2 27  0 28  3 26  0              104934.10200  104934.10334   -0.00134    0.01500   0.00043
  817:  28  4 25  0 27  4 24  0              104937.52200  104937.52512   -0.00312    0.01000   0.00041
  818:  13  5  9  0 12  4  8  0              104976.21600  104976.21169    0.00431    0.01500   0.00063
  819:  25  9 16  0 25  8 17  0              105014.25300  105014.25703   -0.00403    0.01500   0.00080
  820:  25  9 17  0 25  8 18  0              105019.16800  105019.16609    0.00191    0.01500   0.00080
  821:  15  3 12  0 14  2 13  0              105068.92200  105068.94246   -0.02046    0.01500   0.00103
  822:  31  0 31  0 30  1 30  0              105128.74800  105128.64043    0.10757    0.01000   0.00052  105128.74599    0.00201 0.2500
  823:  31  1 31  0 30  0 30  0              105128.74800  105128.85155   -0.10355    0.01000   0.00052  105128.74599    0.00201 0.2500
  824:  31  1 31  0 30  1 30  0              105128.74800  105128.72130    0.02670    0.01000   0.00052  105128.74599    0.00201 0.2500
  825:  31  0 31  0 30  0 30  0              105128.74800  105128.77067   -0.02267    0.01000   0.00052  105128.74599    0.00201 0.2500
  826:  30  1 29  0 29  2 28  0              105137.48900  105137.48302    0.00598    0.01500   0.00046
  827:  45 10 35  0 45  9 36  0              105139.63600  105139.62439    0.01161    0.01500   0.00156
  828:  30  2 29  0 29  2 28  0              105144.69700  105144.69772   -0.00072    0.01000   0.00046
  829:  30  1 29  0 29  1 28  0              105148.61200  105148.61385   -0.00185    0.01000   0.00046
  830:  30  2 29  0 29  1 28  0              105155.82000  105155.82855   -0.00855    0.01500   0.00046
  831:  29  3 27  0 28  3 26  0              105184.82100  105184.81576    0.00524    0.01000   0.00043
  832:  24  9 15  0 24  8 16  0              105219.10100  105219.08474    0.01626    0.01500   0.00080
  833:  13  5  8  0 12  4  9  0              105228.96800  105228.95601    0.01199    0.01500   0.00062
  834:  29  2 27  0 28  2 26  0              105299.59800  105299.59425    0.00375    0.01000   0.00044
  835:  23  9 14  0 23  8 15  0              105398.63400  105398.62826    0.00574    0.01500   0.00080
  836:  23  9 15  0 23  8 16  0              105399.93500  105399.93137    0.00363    0.01500   0.00080
  837:  29  3 26  0 28  4 25  0              105424.16400  105424.17001   -0.00601    0.01500   0.00048
  838:  25  4 22  0 24  3 21  0              105550.19100  105550.18362    0.00738    0.01500   0.00087
  839:  29  3 27  0 28  2 26  0              105550.30400  105550.30667   -0.00267    0.01500   0.00045
  840:  22  9 13  0 22  8 14  0              105555.48300  105555.47253    0.01047    0.01500   0.00081
  841:  22  9 14  0 22  8 15  0              105556.09700  105556.11114   -0.01414    0.01500   0.00081
  842:  28 27  1  0 27 27  0  0              105669.47200  105669.47235   -0.00035    0.01000   0.00070
  843:  28 26  2  0 27 26  1  0              105679.93400  105679.93023    0.00377    0.01000   0.00065
  844:  28 25  3  0 27 25  2  0              105691.39600  105691.39385    0.00215    0.01000   0.00061
  845:  21  9 12  0 21  8 13  0              105691.91400  105691.90834    0.00566    0.01500   0.00081
  846:  21  9 13  0 21  8 14  0              105692.20200  105692.20975   -0.00775    0.01500   0.00081
  847:  28 24  4  0 27 24  3  0              105704.04400  105704.04629   -0.00229    0.01000   0.00057
  848:  28 23  5  0 27 23  4  0              105718.11000  105718.11150   -0.00150    0.01000   0.00054
  849:  28 22  6  0 27 22  5  0              105733.86300  105733.86581   -0.00281    0.01000   0.00051
  850:  28 21  7  0 27 21  6  0              105751.65000  105751.65346   -0.00346    0.01000   0.00048
  851:  28 20  8  0 27 20  7  0              105771.90600  105771.90770   -0.00170    0.01000   0.00045
  852:  28 19  9  0 27 19  8  0              105795.17800  105795.18006   -0.00206    0.01000   0.00043
  853:  20  9 11  0 20  8 12  0              105810.06800  105809.99511    0.07289    0.01500   0.00081  105810.06335    0.00465 0.5000
  854:  20  9 12  0 20  8 13  0              105810.06800  105810.13159   -0.06359    0.01500   0.00081  105810.06335    0.00465 0.5000
  855:  28 18 10  0 27 18  9  0              105822.18900  105822.18160    0.00740    0.01000   0.00041
  856:  28 17 11  0 27 17 10  0              105853.84000  105853.84209   -0.00209    0.01000   0.00039
  857:  28 16 12  0 27 16 11  0              105891.39400  105891.39685   -0.00285    0.01000   0.00038
  858:  19  9 10  0 19  8 11  0              105911.62700  105911.60491    0.02209    0.01500   0.00082  105911.63442   -0.00742 0.5000
  859:  19  9 11  0 19  8 12  0              105911.62700  105911.66393   -0.03693    0.01500   0.00082  105911.63442   -0.00742 0.5000
  860:  28 15 13  0 27 15 12  0              105936.51300  105936.51714   -0.00414    0.01000   0.00037
  861:  28 14 14  0 27 14 13  0              105991.50800  105991.51184   -0.00384    0.01000   0.00036
  862:  18  9  9  0 18  8 10  0              105998.47200  105998.45332    0.01868    0.01500   0.00082  105998.46543    0.00657 0.5000
  863:  18  9 10  0 18  8 11  0              105998.47200  105998.47755   -0.00555    0.01500   0.00082  105998.46543    0.00657 0.5000
  864:  28 13 15  0 27 13 14  0              106059.64600  106059.64968   -0.00368    0.01000   0.00036
  865:  17  9  8  0 17  8  9  0              106072.12300  106072.12123    0.00177    0.01500   0.00083  106072.12593   -0.00293 0.5000
  866:  17  9  9  0 17  8 10  0              106072.12300  106072.13062   -0.00762    0.01500   0.00083  106072.12593   -0.00293 0.5000
  867:  16  9  7  0 16  8  8  0              106134.07100  106134.07053    0.00047    0.01500   0.00083  106134.07223   -0.00123 0.5000
  868:  16  9  8  0 16  8  9  0              106134.07100  106134.07393   -0.00293    0.01500   0.00083  106134.07223   -0.00123 0.5000
  869:  28 12 16  0 27 12 15  0              106145.69300  106145.69569   -0.00269    0.01000   0.00036
  870:  15  9  6  0 15  8  7  0              106185.65600  106185.65542    0.00058    0.01500   0.00083  106185.65599    0.00001 0.5000
  871:  15  9  7  0 15  8  8  0              106185.65600  106185.65656   -0.00056    0.01500   0.00083  106185.65599    0.00001 0.5000
  872:  14  9  5  0 14  8  6  0              106228.12700  106228.13088   -0.00388    0.01500   0.00084
  873:  28  3 25  0 27  3 24  0              106247.50800  106247.50121    0.00679    0.01000   0.00044
  874:  28 11 18  0 27 11 17  0              106256.84800  106256.84964   -0.00164    0.01000   0.00036  106256.85017   -0.00217 0.5000
  875:  28 11 17  0 27 11 16  0              106256.84800  106256.85071   -0.00271    0.01000   0.00036  106256.85017   -0.00217 0.5000
  876:  13  9  4  0 13  8  5  0              106262.66600  106262.65898    0.00702    0.01500   0.00084
  877:  12  9  3  0 12  8  4  0              106290.32600  106290.31375    0.01225    0.01500   0.00085
  878:  11  9  2  0 11  8  3  0              106312.09400  106312.08481    0.00919    0.01500   0.00085
  879:  10  9  1  0 10  8  2  0              106328.87700  106328.88024   -0.00324    0.01500   0.00085
  880:   9  9  0  0  9  8  1  0              106341.54600  106341.52873    0.01727    0.01500   0.00086
  881:  28 10 19  0 27 10 18  0              106404.50400  106404.48848    0.01552    0.01000   0.00037  106404.50465   -0.00065 0.5000
  882:  28 10 18  0 27 10 17  0              106404.50400  106404.52083   -0.01683    0.01000   0.00037  106404.50465   -0.00065 0.5000
  883:  34  5 29  0 33  6 28  0              106547.38700  106547.37025    0.01675    0.01500   0.00167
  884:  28  9 20  0 27  9 19  0              106607.46300  106607.45854    0.00446    0.01000   0.00037
  885:  28  9 19  0 27  9 18  0              106608.20500  106608.21757   -0.01257    0.01000   0.00037
  886:  27  5 22  0 26  5 21  0              106803.29400  106803.29498   -0.00098    0.01000   0.00046
  887:  31  4 27  0 30  5 26  0              106805.54400  106805.55574   -0.01174    0.01500   0.00099
  888:  26  4 23  0 25  3 22  0              106827.07400  106827.06742    0.00658    0.01500   0.00082
  889:  28  8 21  0 27  8 20  0              106895.63900  106895.64360   -0.00460    0.01000   0.00038
  890:  28  8 20  0 27  8 19  0              106908.91700  106908.92504   -0.00804    0.01000   0.00039
  891:  27  4 23  0 26  4 22  0              106918.78500  106918.79062   -0.00562    0.01000   0.00040
  892:  44 10 34  0 44  9 35  0              106946.49600  106946.49185    0.00415    0.01500   0.00137
  893:  28  5 24  0 27  5 23  0              106989.29400  106989.29999   -0.00599    0.01000   0.00040
  894:  28  7 22  0 27  7 21  0              107282.91000  107282.90878    0.00122    0.01000   0.00040
  895:  28  7 21  0 27  7 20  0              107446.53600  107446.52879    0.00721    0.01000   0.00040
  896:  28  6 23  0 27  6 22  0              107561.22800  107561.22812   -0.00012    0.01000   0.00040
  897:  34  1 33  0 34  0 34  0              107806.11500  107806.10603    0.00897    0.01500   0.00235
  898:  34  2 33  0 34  1 34  0              107807.31400  107807.32035   -0.00635    0.01500   0.00235
  899:  30  2 28  0 29  3 27  0              108356.23400  108356.23627   -0.00227    0.01500   0.00043
  900:  29  4 26  0 28  4 25  0              108376.55000  108376.54696    0.00304    0.01000   0.00042
  901:  27  4 24  0 26  3 23  0              108383.64700  108383.64343    0.00357    0.01500   0.00075
  902:  32  0 32  0 31  1 31  0              108465.23200  108465.17378    0.05822    0.01000   0.00054  108465.23929   -0.00729 0.2500
  903:  32  1 32  0 31  0 31  0              108465.23200  108465.30479   -0.07279    0.01000   0.00054  108465.23929   -0.00729 0.2500
  904:  32  1 32  0 31  1 31  0              108465.23200  108465.22392    0.00808    0.01000   0.00054  108465.23929   -0.00729 0.2500
  905:  32  0 32  0 31  0 31  0              108465.23200  108465.25466   -0.02266    0.01000   0.00054  108465.23929   -0.00729 0.2500
  906:  31  1 30  0 30  2 29  0              108475.62900  108475.64603   -0.01703    0.01500   0.00047
  907:  31  2 30  0 30  2 29  0              108480.31100  108480.30642    0.00458    0.01000   0.00047
  908:  31  1 30  0 30  1 29  0              108482.85400  108482.86073   -0.00673    0.01000   0.00047
  909:  43 10 33  0 43  9 34  0              108483.54400  108483.55099   -0.00699    0.01500   0.00122
  910:  31  2 30  0 30  1 29  0              108487.52300  108487.52112    0.00188    0.01500   0.00047
  911:  14  5 10  0 13  4  9  0              108507.03100  108507.01211    0.01889    0.01500   0.00063
  912:  30  3 28  0 29  3 27  0              108527.06600  108527.07228   -0.00628    0.01000   0.00044
  913:  30  2 28  0 29  2 27  0              108606.94200  108606.94869   -0.00669    0.01000   0.00044
  914:  30  3 28  0 29  2 27  0              108777.79100  108777.78471    0.00629    0.01500   0.00045
  915:  28  6 22  0 27  6 21  0              108800.30300  108800.32698   -0.02398    0.01500   0.00045
  916:  14  5  9  0 13  4 10  0              108980.12100  108980.11786    0.00314    0.01500   0.00063
  917:  38  6 32  0 37  7 31  0              109359.68500  109359.66454    0.02046    0.01500   0.00235
  918:  29  3 26  0 28  3 25  0              109408.42900  109408.43548   -0.00648    0.01000   0.00044
  919:  29 28  1  0 28 28  0  0              109440.15600  109440.15190    0.00410    0.01000   0.00076
  920:  45 10 36  0 45  9 37  0              109442.35200  109442.35864   -0.00664    0.01500   0.00110
  921:  29 27  2  0 28 27  1  0              109450.68500  109450.68601   -0.00101    0.01000   0.00071
  922:  29 26  3  0 28 26  2  0              109462.17500  109462.17498    0.00002    0.01000   0.00066
  923:  29 25  4  0 28 25  3  0              109474.78100  109474.78643   -0.00543    0.01000   0.00061
  924:  29 24  5  0 28 24  4  0              109488.72000  109488.72381   -0.00381    0.01000   0.00057
  925:  29 23  6  0 28 23  5  0              109504.23200  109504.23607   -0.00407    0.01000   0.00054
  926:  29 22  7  0 28 22  6  0              109521.64900  109521.63038    0.01862    0.01500   0.00051
  927:  29 21  8  0 28 21  7  0              109541.28400  109541.28947   -0.00547    0.01000   0.00048
  928:  29 20  9  0 28 20  8  0              109563.69100  109563.69511   -0.00411    0.01000   0.00045
  929:  29 19 10  0 28 19  9  0              109589.45300  109589.46076   -0.00776    0.01000   0.00043
  930:  29 18 11  0 28 18 10  0              109619.37700  109619.37753   -0.00053    0.01000   0.00041
  931:  30  3 27  0 29  4 26  0              109632.90900  109632.91332   -0.00432    0.01500   0.00045
  932:  29 17 12  0 28 17 11  0              109654.48400  109654.48031    0.00369    0.01000   0.00039
  933:  29 16 13  0 28 16 12  0              109696.15200  109696.14478    0.00722    0.01000   0.00038
  934:  29 15 14  0 28 15 13  0              109746.24900  109746.23345    0.01555    0.01000   0.00037
  935:  29 14 15  0 28 14 14  0              109807.32000  109807.32196   -0.00196    0.01000   0.00036
  936:  29 13 16  0 28 13 15  0              109883.05900  109883.06192   -0.00292    0.01000   0.00036
  937:  29 12 17  0 28 12 16  0              109978.77300  109978.78758   -0.01458    0.01000   0.00036
  938:  44 10 35  0 44  9 36  0              110044.72100  110044.72101   -0.00001    0.01500   0.00107
  939:  29 11 19  0 28 11 18  0              110102.58200  110102.58371   -0.00171    0.01000   0.00036  110102.58486   -0.00286 0.5000
  940:  29 11 18  0 28 11 17  0              110102.58200  110102.58600   -0.00400    0.01000   0.00036  110102.58486   -0.00286 0.5000
  941:  28  4 25  0 27  3 24  0              110231.76500  110231.76668   -0.00168    0.01500   0.00068
  942:  29 10 20  0 28 10 19  0              110267.30500  110267.27925    0.02575    0.01000   0.00037  110267.31126   -0.00626 0.5000
  943:  29 10 19  0 28 10 18  0              110267.30500  110267.34327   -0.03827    0.01000   0.00037  110267.31126   -0.00626 0.5000
  944:  11  6  5  0 10  5  6  0              110304.43000  110304.42104    0.00896    0.01500   0.00070
  945:  29  9 21  0 28  9 20  0              110494.10400  110494.11004   -0.00604    0.01000   0.00038
  946:  29  9 20  0 28  9 19  0              110495.47700  110495.49304   -0.01604    0.01000   0.00038
  947:  28  4 24  0 27  4 23  0              110515.31700  110515.31814   -0.00114    0.01000   0.00041
  948:  29  5 25  0 28  5 24  0              110656.40600  110656.41381   -0.00781    0.01000   0.00041
  949:  43 10 34  0 43  9 35  0              110675.29200  110675.30533   -0.01333    0.01500   0.00104
  950:  29  8 22  0 28  8 21  0              110814.94500  110814.95397   -0.00897    0.01000   0.00039
  951:  28  5 23  0 27  5 22  0              111080.75500  111080.77315   -0.01815    0.01000   0.00046
  952:  35  2 34  0 35  1 35  0              111155.01500  111155.01377    0.00123    0.01500   0.00250
  953:  29  7 23  0 28  7 22  0              111228.18500  111228.17875    0.00625    0.01000   0.00040
  954:  42 10 33  0 42  9 34  0              111315.38400  111315.39278   -0.00878    0.01500   0.00101
  955:  29  6 24  0 28  6 23  0              111444.86000  111444.85844    0.00156    0.01000   0.00040
  956:   8  7  2  0  7  6  1  0              111527.38800  111527.38172    0.00628    0.01500   0.00076  111527.38179    0.00621 0.5000
  957:   8  7  1  0  7  6  2  0              111527.38800  111527.38186    0.00614    0.01500   0.00076  111527.38179    0.00621 0.5000
  958:  30  4 27  0 29  4 26  0              111791.13400  111791.13289    0.00111    0.01000   0.00043
  959:  33  0 33  0 32  1 32  0              111801.67100  111801.63269    0.03831    0.01000   0.00056  111801.67327   -0.00227 0.2500
  960:  33  1 33  0 32  0 32  0              111801.67100  111801.71386   -0.04286    0.01000   0.00056  111801.67327   -0.00227 0.2500
  961:  33  1 33  0 32  1 32  0              111801.67100  111801.66372    0.00728    0.01000   0.00056  111801.67327   -0.00227 0.2500
  962:  33  0 33  0 32  0 32  0              111801.67100  111801.68282   -0.01182    0.01000   0.00056  111801.67327   -0.00227 0.2500
  963:  32  1 31  0 31  2 30  0              111812.81100  111812.80743    0.00357    0.01500   0.00048
  964:  32  2 31  0 31  2 30  0              111815.80600  111815.80831   -0.00231    0.01000   0.00048
  965:  32  1 31  0 31  1 30  0              111817.46500  111817.46782   -0.00282    0.01000   0.00048
  966:  32  2 31  0 31  1 30  0              111820.46900  111820.46870    0.00030    0.01500   0.00048
  967:  31  3 29  0 30  3 28  0              111865.91000  111865.90787    0.00213    0.01000   0.00045
  968:  15  5 11  0 14  4 10  0              111919.36400  111919.37051   -0.00651    0.01500   0.00064
  969:  31  2 29  0 30  2 28  0              111921.03400  111921.03656   -0.00256    0.01000   0.00045
  970:  41 10 32  0 41  9 33  0              111949.85500  111949.84777    0.00723    0.01500   0.00099
  971:  31  3 29  0 30  2 28  0              112036.74800  112036.74389    0.00411    0.01500   0.00045
  972:  29  4 26  0 28  3 25  0              112360.81500  112360.81243    0.00257    0.01500   0.00062
  973:  40 10 31  0 40  9 32  0              112566.96700  112566.97570   -0.00870    0.01500   0.00096
  974:  30  3 27  0 29  3 26  0              112585.29000  112585.29028   -0.00028    0.01000   0.00045
  975:  39 10 29  0 39  9 30  0              112693.44600  112693.44551    0.00049    0.01500   0.00096
  976:  32  4 28  0 31  5 27  0              112706.27300  112706.26191    0.01109    0.01500   0.00087
  977:  29  6 23  0 28  6 22  0              113110.24000  113110.22348    0.01652    0.01000   0.00047
  978:  39 10 30  0 39  9 31  0              113158.21700  113158.21352    0.00348    0.01500   0.00094
  979:  30 29  1  0 29 29  0  0              113210.51700  113210.52157   -0.00457    0.01000   0.00083
  980:  30 28  2  0 29 28  1  0              113221.16000  113221.14071    0.01929    0.01500   0.00077
  981:  30 27  3  0 29 27  2  0              113232.65700  113232.66794   -0.01094    0.01500   0.00071
  982:  30 26  4  0 29 26  3  0              113245.25800  113245.25729    0.00071    0.01000   0.00066
  983:  30 25  5  0 29 25  4  0              113259.09400  113259.09441   -0.00041    0.01000   0.00062
  984:  30 24  6  0 29 24  5  0              113274.40400  113274.40463   -0.00063    0.01000   0.00058
  985:  30 23  7  0 29 23  6  0              113291.46400  113291.46366    0.00034    0.01000   0.00054
  986:  30 22  8  0 29 22  7  0              113310.60900  113310.61181   -0.00281    0.01000   0.00051
  987:  30 21  9  0 29 21  8  0              113332.26700  113332.27311   -0.00611    0.01000   0.00048
  988:  30 20 10  0 29 20  9  0              113356.97800  113356.98145   -0.00345    0.01000   0.00046
  989:  30 19 11  0 29 19 10  0              113385.41100  113385.41682   -0.00582    0.01000   0.00043
  990:  38 10 28  0 38  9 29  0              113414.92000  113414.91456    0.00544    0.01500   0.00093
  991:  30 18 12  0 29 18 11  0              113418.45300  113418.45645   -0.00345    0.01000   0.00041
  992:  30 17 13  0 29 17 12  0              113457.24100  113457.24836   -0.00736    0.01000   0.00039
  993:  30 16 14  0 29 16 13  0              113503.31600  113503.31952   -0.00352    0.01000   0.00038
  994:  30 15 15  0 29 15 14  0              113558.73000  113558.73894   -0.00894    0.01000   0.00037
  995:  31  3 28  0 30  4 27  0              113626.11500  113626.11185    0.00315    0.01500   0.00044
  996:  30 14 16  0 29 14 15  0              113626.37300  113626.37102    0.00198    0.01000   0.00036
  997:  30 13 17  0 29 13 16  0              113710.28200  113710.28316   -0.00116    0.01000   0.00036
  998:  38 10 29  0 38  9 30  0              113717.72400  113717.71507    0.00893    0.01500   0.00092
  999:  30 12 18  0 29 12 17  0              113816.43000  113816.43089   -0.00089    0.01000   0.00036
 1000:  30 11 20  0 29 11 19  0              113953.87200  113953.87137    0.00063    0.01000   0.00036  113953.87375   -0.00175 0.5000
 1001:  30 11 19  0 29 11 18  0              113953.87200  113953.87614   -0.00414    0.01000   0.00036  113953.87375   -0.00175 0.5000
 1002:  29  4 25  0 28  4 24  0              113986.00900  113986.00897    0.00003    0.01000   0.00041
 1003:  37 10 27  0 37  9 28  0              114047.85000  114047.84900    0.00100    0.01500   0.00091
 1004:  12  6  7  0 11  5  6  0              114049.73900  114049.74243   -0.00343    0.01500   0.00070
 1005:  12  6  6  0 11  5  7  0              114053.56800  114053.55795    0.01005    0.01500   0.00070
 1006:  35  5 30  0 34  6 29  0              114099.71000  114099.68742    0.02258    0.01500   0.00158
 1007:  30 10 21  0 29 10 20  0              114137.09700  114137.03799    0.05901    0.01000   0.00037  114137.09968   -0.00268 0.5000
 1008:  30 10 20  0 29 10 19  0              114137.09700  114137.16138   -0.06438    0.01000   0.00037  114137.09968   -0.00268 0.5000
 1009:  37 10 28  0 37  9 29  0              114241.89300  114241.88955    0.00345    0.01500   0.00090
 1010:  30  5 26  0 29  5 25  0              114282.68300  114282.68945   -0.00645    0.01000   0.00041
 1011:  30  9 22  0 29  9 21  0              114389.72600  114389.72406    0.00194    0.01000   0.00038
 1012:  30  9 21  0 29  9 20  0              114392.17400  114392.18444   -0.01044    0.01000   0.00038
 1013:  30  4 27  0 29  3 26  0              114743.50900  114743.50984   -0.00084    0.01500   0.00058
 1014:  30  8 23  0 29  8 22  0              114744.80000  114744.80566   -0.00566    0.01000   0.00039
 1015:  30  8 22  0 29  8 21  0              114781.21400  114781.21873   -0.00473    0.01000   0.00039
 1016:  35 10 25  0 35  9 26  0              115102.73500  115102.73309    0.00191    0.01500   0.00088
 1017:  32  2 30  0 31  3 29  0              115124.45700  115124.45481    0.00219    0.01500   0.00045
 1018:  34  0 34  0 33  1 33  0              115138.04200  115138.01900    0.02300    0.01000   0.00059  115138.04411   -0.00211 0.2500
 1019:  34  1 34  0 33  0 33  0              115138.04200  115138.06922   -0.02722    0.01000   0.00059  115138.04411   -0.00211 0.2500
 1020:  34  1 34  0 33  1 33  0              115138.04200  115138.03818    0.00382    0.01000   0.00059  115138.04411   -0.00211 0.2500
 1021:  34  0 34  0 33  0 33  0              115138.04200  115138.05004   -0.00804    0.01000   0.00059  115138.04411   -0.00211 0.2500
 1022:  33  1 32  0 32  2 31  0              115149.33300  115149.32265    0.01035    0.01500   0.00049
 1023:  33  2 32  0 32  2 31  0              115151.24300  115151.24925   -0.00625    0.01000   0.00049
 1024:  33  1 32  0 32  1 31  0              115152.31900  115152.32352   -0.00452    0.01000   0.00049
 1025:  33  2 32  0 32  1 31  0              115154.24900  115154.25012   -0.00112    0.01500   0.00049
 1026:  16  5 12  0 15  4 11  0              115169.03400  115169.04628   -0.01228    0.01500   0.00065
 1027:  30  7 24  0 29  7 23  0              115177.17000  115177.15614    0.01386    0.01500   0.00040
 1028:  35 10 26  0 35  9 27  0              115178.44600  115178.43683    0.00917    0.01500   0.00088
 1029:  31  4 28  0 30  4 27  0              115185.16000  115185.15829    0.00171    0.01000   0.00043
 1030:  32  3 30  0 31  3 29  0              115202.39000  115202.39343   -0.00343    0.01000   0.00046
 1031:  32  2 30  0 31  2 29  0              115240.16400  115240.16214    0.00186    0.01000   0.00046
 1032:  29  5 24  0 28  5 23  0              115280.13400  115280.13864   -0.00464    0.01000   0.00045
 1033:   9  7  3  0  8  6  2  0              115300.40900  115300.41088   -0.00188    0.01500   0.00076  115300.41137   -0.00237 0.5000
 1034:   9  7  2  0  8  6  3  0              115300.40900  115300.41185   -0.00285    0.01500   0.00076  115300.41137   -0.00237 0.5000
 1035:  30  6 25  0 29  6 24  0              115305.75300  115305.75529   -0.00229    0.01000   0.00041
 1036:  32  3 30  0 31  2 29  0              115318.11200  115318.10075    0.01125    0.01500   0.00046
 1037:  34 10 24  0 34  9 25  0              115544.91500  115544.90512    0.00988    0.01500   0.00087
 1038:  30  7 23  0 29  7 22  0              115549.55500  115549.55644   -0.00144    0.01000   0.00042
 1039:  31  3 28  0 30  3 27  0              115784.33100  115784.33142   -0.00042    0.01000   0.00045
 1040:  33 10 23  0 33  9 24  0              115940.24200  115940.23498    0.00702    0.01500   0.00086
 1041:  32 10 22  0 32  9 23  0              116294.35200  116294.35597   -0.00397    0.01500   0.00086
 1042:  31 10 21  0 31  9 22  0              116611.82900  116611.84796   -0.01896    0.01500   0.00085
 1043:  31 10 22  0 31  9 23  0              116621.06600  116621.06949   -0.00349    0.01500   0.00085
 1044:  30 10 21  0 30  9 22  0              116901.68100  116901.67751    0.00349    0.01500   0.00085
 1045:  31 30  1  0 30 30  0  0              116980.57000  116980.57014   -0.00014    0.01000   0.00091
 1046:  31 29  2  0 30 29  1  0              116991.28300  116991.28268    0.00032    0.01000   0.00083
 1047:  31 28  3  0 30 28  2  0              117002.86100  117002.86015    0.00085    0.01000   0.00077
 1048:  31 27  4  0 30 27  3  0              117015.44200  117015.44459   -0.00259    0.01000   0.00071
 1049:  31 26  5  0 30 26  4  0              117029.20300  117029.20605   -0.00305    0.01000   0.00066
 1050:  31 25  6  0 30 25  5  0              117044.34800  117044.34942   -0.00142    0.01000   0.00062
 1051:  31 24  7  0 30 24  6  0              117061.12100  117061.12344   -0.00244    0.01000   0.00058
 1052:  31 23  8  0 30 23  7  0              117079.82000  117079.83251   -0.01251    0.01000   0.00054
 1053:  31 22  9  0 30 22  8  0              117100.84600  117100.85239   -0.00639    0.01000   0.00051
 1054:  31 21 10  0 30 21  9  0              117124.64700  117124.65137   -0.00437    0.01000   0.00048
 1055:  31 20 11  0 30 20 10  0              117151.81400  117151.81920   -0.00520    0.01000   0.00046
 1056:  29 10 20  0 29  9 21  0              117154.35100  117154.36358   -0.01258    0.01500   0.00085
 1057:  31 19 12  0 30 19 11  0              117183.10800  117183.10724    0.00076    0.01000   0.00044
 1058:  31 18 13  0 30 18 12  0              117219.47700  117219.48513   -0.00813    0.01000   0.00041
 1059:  31 17 14  0 30 17 13  0              117262.21800  117262.22247   -0.00447    0.01000   0.00040
 1060:  31 16 15  0 30 16 14  0              117313.00400  117313.00905   -0.00505    0.01000   0.00038
 1061:  30  4 26  0 29  4 25  0              117339.13000  117339.13239   -0.00239    0.01000   0.00043
 1062:  31  4 28  0 30  3 27  0              117343.36300  117343.37785   -0.01485    0.01500   0.00054
 1063:  31 15 16  0 30 15 15  0              117374.14500  117374.13653    0.00847    0.01000   0.00037
 1064:  28 10 18  0 28  9 19  0              117379.66100  117379.67652   -0.01552    0.01500   0.00085
 1065:  28 10 19  0 28  9 20  0              117381.18500  117381.19437   -0.00937    0.01500   0.00085
 1066:  32  3 29  0 31  4 28  0              117447.80200  117447.80354   -0.00154    0.01500   0.00044
 1067:  31 14 17  0 30 14 16  0              117448.77900  117448.78145   -0.00245    0.01000   0.00036
 1068:  30  6 24  0 29  6 23  0              117476.00000  117476.00248   -0.00248    0.01000   0.00048
 1069:  31 13 18  0 30 13 17  0              117541.45800  117541.46245   -0.00445    0.01000   0.00036
 1070:  27 10 17  0 27  9 18  0              117583.36600  117583.37325   -0.00725    0.01500   0.00085
 1071:  27 10 18  0 27  9 19  0              117584.15800  117584.16443   -0.00643    0.01500   0.00085
 1072:  31 12 19  0 30 12 18  0              117658.81300  117658.81296    0.00004    0.01000   0.00036
 1073:  26 10 16  0 26  9 17  0              117764.78500  117764.77367    0.01133    0.01500   0.00085
 1074:  26 10 17  0 26  9 18  0              117765.16200  117765.17465   -0.01265    0.01500   0.00085
 1075:  13  6  8  0 12  5  7  0              117782.84900  117782.85098   -0.00198    0.01500   0.00071
 1076:  13  6  7  0 12  5  8  0              117792.13900  117792.11409    0.02491    0.01500   0.00071
 1077:  31 11 21  0 30 11 20  0              117810.96200  117810.95853    0.00347    0.01000   0.00037  117810.96338   -0.00138 0.5000
 1078:  31 11 20  0 30 11 19  0              117810.96200  117810.96823   -0.00623    0.01000   0.00037  117810.96338   -0.00138 0.5000
 1079:  31  5 27  0 30  5 26  0              117868.38200  117868.38518   -0.00318    0.01000   0.00042
 1080:  39  6 33  0 38  7 32  0              117958.87400  117958.88385   -0.00985    0.01500   0.00236
 1081:  31 10 22  0 30 10 21  0              118014.21500  118014.10218    0.11282    0.01000   0.00037  118014.21819   -0.00319 0.5000
 1082:  31 10 21  0 30 10 20  0              118014.21500  118014.33420   -0.11920    0.01000   0.00037  118014.21819   -0.00319 0.5000
 1083:  24 10 14  0 24  9 15  0              118068.34500  118068.30450    0.04050    0.01500   0.00085  118068.35141   -0.00641 0.5000
 1084:  24 10 15  0 24  9 16  0              118068.34500  118068.39831   -0.05331    0.01500   0.00085  118068.35141   -0.00641 0.5000
 1085:  33  4 29  0 32  5 28  0              118191.32400  118191.33020   -0.00620    0.01500   0.00076
 1086:  23 10 13  0 23  9 14  0              118193.87200  118193.84640    0.02560    0.01500   0.00086  118193.86794    0.00406 0.5000
 1087:  23 10 14  0 23  9 15  0              118193.87200  118193.88947   -0.01747    0.01500   0.00086  118193.86794    0.00406 0.5000
 1088:  17  5 13  0 16  4 12  0              118203.47400  118203.48239   -0.00839    0.01500   0.00067
 1089:  31  9 23  0 30  9 22  0              118294.70400  118294.71020   -0.00620    0.01000   0.00038
 1090:  31  9 22  0 30  9 21  0              118298.99500  118298.98993    0.00507    0.01000   0.00038
 1091:  22 10 12  0 22  9 13  0              118303.97800  118303.96363    0.01437    0.01500   0.00086  118303.97314    0.00486 0.5000
 1092:  22 10 13  0 22  9 14  0              118303.97800  118303.98264   -0.00464    0.01500   0.00086  118303.97314    0.00486 0.5000
 1093:  21 10 11  0 21  9 12  0              118400.08000  118400.06245    0.01755    0.01500   0.00087  118400.06646    0.01354 0.5000
 1094:  21 10 12  0 21  9 13  0              118400.08000  118400.07048    0.00952    0.01500   0.00087  118400.06646    0.01354 0.5000
 1095:  35  0 35  0 34  1 34  0              118474.34700  118474.33272    0.01428    0.01000   0.00062  118474.34823   -0.00123 0.2500
 1096:  35  1 35  0 34  0 34  0              118474.34700  118474.36374   -0.01674    0.01000   0.00062  118474.34823   -0.00123 0.2500
 1097:  35  1 35  0 34  1 34  0              118474.34700  118474.34456    0.00244    0.01000   0.00062  118474.34823   -0.00123 0.2500
 1098:  35  0 35  0 34  0 34  0              118474.34700  118474.35190   -0.00490    0.01000   0.00062  118474.34823   -0.00123 0.2500
 1099:  33  2 31  0 32  3 30  0              118485.07000  118485.08432   -0.01432    0.01500   0.00046
 1100:  34  1 33  0 33  2 32  0              118485.42000  118485.42144   -0.00144    0.01500   0.00051
 1101:  34  2 33  0 33  2 32  0              118486.65900  118486.65494    0.00406    0.01000   0.00051
 1102:  34  1 33  0 33  1 32  0              118487.33300  118487.34804   -0.01504    0.01500   0.00051
 1103:  34  2 33  0 33  1 32  0              118488.57400  118488.58154   -0.00754    0.01500   0.00051
 1104:  33  3 31  0 32  3 30  0              118537.33200  118537.31851    0.01349    0.01000   0.00047
 1105:  19 10  9  0 19  9 10  0              118555.35000  118555.36351   -0.01351    0.01500   0.00088  118555.36412   -0.01412 0.5000
 1106:  19 10 10  0 19  9 11  0              118555.35000  118555.36474   -0.01474    0.01500   0.00088  118555.36412   -0.01412 0.5000
 1107:  32  4 29  0 31  4 28  0              118562.35100  118562.34754    0.00346    0.01000   0.00044
 1108:  33  2 31  0 32  2 30  0              118563.01900  118563.02293   -0.00393    0.01000   0.00047
 1109:  33  3 31  0 32  2 30  0              118615.25700  118615.25713   -0.00013    0.01500   0.00047
 1110:  18 10  8  0 18  9  9  0              118616.93100  118616.93655   -0.00555    0.01500   0.00088
 1111:  17 10  7  0 17  9  8  0              118669.23700  118669.24524   -0.00824    0.01500   0.00089
 1112:  31  8 24  0 30  8 23  0              118684.99800  118685.01128   -0.01328    0.01000   0.00040
 1113:  16 10  6  0 16  9  7  0              118713.29100  118713.29229   -0.00129    0.01500   0.00089
 1114:  31  8 23  0 30  8 22  0              118743.39700  118743.39554    0.00146    0.01000   0.00040
 1115:  15 10  5  0 15  9  6  0              118750.02100  118750.01471    0.00629    0.01500   0.00090
 1116:  14 10  4  0 14  9  5  0              118780.28500  118780.28668   -0.00168    0.01500   0.00090
 1117:  13 10  3  0 13  9  4  0              118804.93100  118804.92189    0.00911    0.01500   0.00091
 1118:  12 10  2  0 12  9  3  0              118824.67200  118824.67545   -0.00345    0.01500   0.00091
 1119:  11 10  1  0 11  9  2  0              118840.24900  118840.24534    0.00366    0.01500   0.00092
 1120:  32  3 29  0 31  3 28  0              119006.86100  119006.84998    0.01102    0.01000   0.00046
 1121:  10  7  4  0  9  6  3  0              119071.32800  119071.33436   -0.00636    0.01500   0.00076  119071.33680   -0.00880 0.5000
 1122:  10  7  3  0  9  6  4  0              119071.32800  119071.33924   -0.01124    0.01500   0.00076  119071.33680   -0.00880 0.5000
 1123:  31  7 25  0 30  7 24  0              119126.53300  119126.53715   -0.00415    0.01000   0.00041
 1124:  31  6 26  0 30  6 25  0              119138.69300  119138.69258    0.00042    0.01000   0.00041
 1125:  30  5 25  0 29  5 24  0              119379.88700  119379.89090   -0.00390    0.01000   0.00044
 1126:  31  7 24  0 30  7 23  0              119669.57600  119669.56848    0.00752    0.01000   0.00043
 1127:  32  4 29  0 31  3 28  0              120121.38100  120121.39397   -0.01297    0.01500   0.00052
 1128:  31  4 27  0 30  4 26  0              120591.84000  120591.83841    0.00159    0.01000   0.00044
 1129:  32 31  1  0 31 31  0  0              120750.28700  120750.28639    0.00061    0.01000   0.00099
 1130:  32 30  2  0 31 30  1  0              120761.10100  120761.10033    0.00067    0.01000   0.00090
 1131:  32 29  3  0 31 29  2  0              120772.74100  120772.73924    0.00176    0.01000   0.00083
 1132:  32 28  4  0 31 28  3  0              120785.33100  120785.33451   -0.00351    0.01000   0.00076
 1133:  32 27  5  0 31 27  4  0              120799.04200  120799.04246   -0.00046    0.01000   0.00071
 1134:  32 26  6  0 31 26  5  0              120814.05100  120814.05016    0.00084    0.01000   0.00066
 1135:  32 25  7  0 31 25  6  0              120830.59600  120830.58309    0.01291    0.01000   0.00062
 1136:  32 24  8  0 31 24  7  0              120848.91600  120848.91500    0.00100    0.01000   0.00058
 1137:  32 23  9  0 31 23  8  0              120869.37900  120869.38092   -0.00192    0.01000   0.00055
 1138:  32 22 10  0 31 22  9  0              120892.39400  120892.39451   -0.00051    0.01000   0.00052
 1139:  32 21 11  0 31 21 10  0              120918.46800  120918.47139   -0.00339    0.01000   0.00049
 1140:  32 20 12  0 31 20 11  0              120948.25800  120948.26106   -0.00306    0.01000   0.00046
 1141:  18  5 14  0 17  4 13  0              120965.75600  120965.74809    0.00791    0.01500   0.00070
 1142:  32 19 13  0 31 19 12  0              120982.59100  120982.59128   -0.00028    0.01000   0.00044
 1143:  32 18 14  0 31 18 13  0              121022.52600  121022.53075   -0.00475    0.01000   0.00042
 1144:  32 17 15  0 31 17 14  0              121069.47600  121069.47949   -0.00349    0.01000   0.00040
 1145:  32 16 16  0 31 16 15  0              121125.29800  121125.30224   -0.00424    0.01000   0.00039
 1146:  33  3 30  0 32  4 29  0              121136.63900  121136.63637    0.00263    0.01500   0.00044
 1147:  32 15 17  0 31 15 16  0              121192.53000  121192.53044   -0.00044    0.01000   0.00037
 1148:  32 14 18  0 31 14 17  0              121274.67600  121274.67778   -0.00178    0.01000   0.00037
 1149:  36  5 31  0 35  6 30  0              121293.32200  121293.31877    0.00323    0.01500   0.00146
 1150:  32 11 22  0 31 11 21  0              121674.10700  121674.10176    0.00524    0.01000   0.00037  121674.11135   -0.00435 0.5000
 1151:  32 11 21  0 31 11 20  0              121674.10700  121674.12095   -0.01395    0.01000   0.00037  121674.11135   -0.00435 0.5000
 1152:  36  0 36  0 35  1 35  0              121810.58400  121810.57269    0.01131    0.01000   0.00065  121810.58226    0.00174 0.2500
 1153:  36  1 36  0 35  0 35  0              121810.58400  121810.59183   -0.00783    0.01000   0.00065  121810.58226    0.00174 0.2500
 1154:  36  1 36  0 35  1 35  0              121810.58400  121810.57999    0.00401    0.01000   0.00065  121810.58226    0.00174 0.2500
 1155:  36  0 36  0 35  0 35  0              121810.58400  121810.58453   -0.00053    0.01000   0.00065  121810.58226    0.00174 0.2500
 1156:  35  1 34  0 34  2 33  0              121821.26500  121821.25025    0.01475    0.01500   0.00053
 1157:  35  2 34  0 34  2 33  0              121822.03000  121822.03797   -0.00797    0.01000   0.00053
 1158:  35  1 34  0 34  1 33  0              121822.48600  121822.48375    0.00225    0.01000   0.00053
 1159:  35  2 34  0 34  1 33  0              121823.26000  121823.27147   -0.01147    0.01500   0.00053
 1160:  34  2 32  0 33  3 31  0              121836.39100  121836.40537   -0.01437    0.01500   0.00048
 1161:  34  3 32  0 33  3 31  0              121871.23500  121871.25043   -0.01543    0.01000   0.00048
 1162:  31  6 25  0 30  6 24  0              121878.82600  121878.83671   -0.01071    0.01000   0.00050
 1163:  34  2 32  0 33  2 31  0              121888.64000  121888.63956    0.00044    0.01000   0.00048
 1164:  32 10 23  0 31 10 22  0              121898.81000  121898.82481   -0.01481    0.01000   0.00038
 1165:  32 10 22  0 31 10 21  0              121899.25000  121899.25104   -0.00104    0.01000   0.00038
 1166:  34  3 32  0 33  2 31  0              121923.49600  121923.48463    0.01137    0.01500   0.00048
 1167:  33  4 30  0 32  4 29  0              121926.11700  121926.11766   -0.00066    0.01000   0.00045
 1168:  32  9 24  0 31  9 23  0              122209.46000  122209.45521    0.00479    0.01000   0.00039
 1169:  32  9 23  0 31  9 22  0              122216.73800  122216.74303   -0.00503    0.01000   0.00039
 1170:  33  3 30  0 32  3 29  0              122251.17500  122251.18037   -0.00537    0.01000   0.00046
 1171:  32  8 25  0 31  8 24  0              122635.05800  122635.05741    0.00059    0.01000   0.00040
 1172:  32  8 24  0 31  8 23  0              122726.79100  122726.78688    0.00412    0.01000   0.00041
 1173:  11  7  5  0 10  6  4  0              122839.07400  122839.05037    0.02363    0.01500   0.00077  122839.06014    0.01386 0.5000
 1174:  11  7  4  0 10  6  5  0              122839.07400  122839.06991    0.00409    0.01500   0.00077  122839.06014    0.01386 0.5000
 1175:  32  6 27  0 31  6 26  0              122938.95000  122938.94108    0.00892    0.01500   0.00042
 1176:  33  4 30  0 32  3 29  0              123040.66600  123040.66166    0.00434    0.01500   0.00050
 1177:  32  7 26  0 31  7 25  0              123072.30000  123072.30521   -0.00521    0.01000   0.00041
 1178:  45 11 34  0 45 10 35  0              123235.05400  123235.05281    0.00119    0.01500   0.00120
 1179:  34  4 30  0 33  5 29  0              123279.15900  123279.15330    0.00570    0.01500   0.00066
 1180:  31  5 26  0 30  5 25  0              123364.18500  123364.19099   -0.00599    0.01000   0.00044
 1181:  19  5 15  0 18  4 14  0              123401.64100  123401.64671   -0.00571    0.01500   0.00074
 1182:  32  4 28  0 31  4 27  0              123769.09500  123769.09135    0.00365    0.01000   0.00046
 1183:  45 11 35  0 45 10 36  0              123819.58800  123819.60841   -0.02041    0.01500   0.00115
 1184:  32  7 25  0 31  7 24  0              123846.04000  123846.04347   -0.00347    0.01000   0.00045
 1185:   8  8  1  0  7  7  0  0              124039.14700  124039.15712   -0.01012    0.01500   0.00082  124039.15712   -0.01012 0.5000
 1186:   8  8  0  0  7  7  1  0              124039.14700  124039.15712   -0.01012    0.01500   0.00082  124039.15712   -0.01012 0.5000
 1187:  44 11 33  0 44 10 34  0              124086.20100  124086.19891    0.00209    0.01500   0.00114
 1188:  33 32  1  0 32 32  0  0              124519.64300  124519.65907   -0.01607    0.01000   0.00110
 1189:  33 31  2  0 32 31  1  0              124530.57800  124530.58211   -0.00411    0.01000   0.00099
 1190:  33 30  3  0 32 30  2  0              124542.29500  124542.29299    0.00201    0.01000   0.00090
 1191:  33 29  4  0 32 29  3  0              124554.90000  124554.91361   -0.01361    0.01000   0.00083
 1192:  33 28  5  0 32 28  4  0              124568.59200  124568.58813    0.00387    0.01000   0.00076
 1193:  33 27  6  0 32 27  5  0              124583.48900  124583.48803    0.00097    0.01000   0.00071
 1194:  33 26  7  0 32 26  6  0              124599.81600  124599.81856   -0.00256    0.01000   0.00066
 1195:  33 25  8  0 32 25  7  0              124617.82400  124617.82712   -0.00312    0.01000   0.00062
 1196:  33 24  9  0 32 24  8  0              124637.81100  124637.81412   -0.00312    0.01000   0.00058
 1197:  33 23 10  0 32 23  9  0              124660.14700  124660.14728   -0.00028    0.01000   0.00055
 1198:  33 22 11  0 32 22 10  0              124685.27600  124685.28068   -0.00468    0.01000   0.00052
 1199:  33 21 12  0 32 21 11  0              124713.77700  124713.78044   -0.00344    0.01000   0.00049
 1200:  34  3 31  0 33  4 30  0              124724.80500  124724.80869   -0.00369    0.01500   0.00046
 1201:  33 20 13  0 32 20 12  0              124746.35000  124746.35992   -0.00992    0.01000   0.00047
 1202:  33 19 14  0 32 19 13  0              124783.92600  124783.92852   -0.00252    0.01000   0.00044
 1203:  33 18 15  0 32 18 14  0              124827.66400  124827.66091    0.00309    0.01000   0.00042
 1204:  33 17 16  0 32 17 15  0              124879.09400  124879.09687   -0.00287    0.01000   0.00040
 1205:  33  5 29  0 32  5 28  0              124924.26800  124924.27081   -0.00281    0.01000   0.00044
 1206:  33 16 17  0 32 16 16  0              124940.29700  124940.28891    0.00809    0.01000   0.00039
 1207:  33 15 18  0 32 15 17  0              125014.02200  125014.02639   -0.00439    0.01000   0.00038
 1208:  33 14 19  0 32 14 18  0              125104.18500  125104.18691   -0.00191    0.01000   0.00037
 1209:  37  0 37  0 36  1 36  0              125146.74400  125146.73712    0.00688    0.01000   0.00068  125146.74302    0.00098 0.2500
 1210:  37  1 37  0 36  0 36  0              125146.74400  125146.74891   -0.00491    0.01000   0.00068  125146.74302    0.00098 0.2500
 1211:  37  1 37  0 36  1 36  0              125146.74400  125146.74161    0.00239    0.01000   0.00068  125146.74302    0.00098 0.2500
 1212:  37  0 37  0 36  0 36  0              125146.74400  125146.74442   -0.00042    0.01000   0.00068  125146.74302    0.00098 0.2500
 1213:  36  1 35  0 35  2 34  0              125156.90200  125156.90075    0.00125    0.01500   0.00055
 1214:  36  2 35  0 35  2 34  0              125157.40700  125157.40259    0.00441    0.01000   0.00055
 1215:  36  1 35  0 35  1 34  0              125157.68500  125157.68848   -0.00348    0.01000   0.00055
 1216:  36  2 35  0 35  1 34  0              125158.21300  125158.19031    0.02269    0.01500   0.00055
 1217:  35  2 33  0 34  3 32  0              125181.43600  125181.44094   -0.00494    0.01500   0.00049
 1218:  15  6 10  0 14  5  9  0              125187.59500  125187.58521    0.00979    0.01500   0.00071
 1219:  35  3 33  0 34  3 32  0              125204.59100  125204.58630    0.00470    0.01000   0.00049
 1220:  33 13 20  0 32 13 19  0              125216.29600  125216.30909   -0.01309    0.01000   0.00037
 1221:  35  2 33  0 34  2 32  0              125216.29700  125216.28600    0.01100    0.01000   0.00049
 1222:  15  6  9  0 14  5 10  0              125231.33800  125231.35508   -0.01708    0.01500   0.00071
 1223:  35  3 33  0 34  2 32  0              125239.43700  125239.43136    0.00564    0.01500   0.00050
 1224:  34  4 31  0 33  4 30  0              125279.47700  125279.47715   -0.00015    0.01000   0.00047
 1225:  33 12 22  0 32 12 21  0              125358.57200  125358.57214   -0.00014    0.01000   0.00037  125358.57285   -0.00085 0.5000
 1226:  33 12 21  0 32 12 20  0              125358.57200  125358.57356   -0.00156    0.01000   0.00037  125358.57285   -0.00085 0.5000
 1227:  20  5 16  0 19  4 15  0              125468.88800  125468.87056    0.01744    0.01500   0.00080
 1228:  34  3 31  0 33  3 30  0              125514.29900  125514.28999    0.00901    0.01000   0.00047
 1229:  33 11 23  0 32 11 22  0              125543.59800  125543.56946    0.02854    0.01000   0.00038  125543.58801    0.00999 0.5000
 1230:  33 11 22  0 32 11 21  0              125543.59800  125543.60656   -0.00856    0.01000   0.00038  125543.58801    0.00999 0.5000
 1231:  33 10 24  0 32 10 23  0              125791.57700  125791.57371    0.00329    0.01000   0.00039
 1232:  33 10 23  0 32 10 22  0              125792.34200  125792.33978    0.00222    0.01000   0.00039
 1233:  34  4 31  0 33  3 30  0              126068.95700  126068.95844   -0.00144    0.01500   0.00050
 1234:  41 11 30  0 41 10 31  0              126113.39500  126113.39627   -0.00127    0.01500   0.00103
 1235:  33  9 25  0 32  9 24  0              126134.30500  126134.29867    0.00633    0.01000   0.00040
 1236:  32  6 26  0 31  6 25  0              126290.92400  126290.91602    0.00798    0.01000   0.00051
 1237:  33  8 26  0 32  8 25  0              126594.01200  126594.01027    0.00173    0.01000   0.00041
 1238:  12  7  6  0 11  6  5  0              126602.29900  126602.26632    0.03268    0.01500   0.00077  126602.29959   -0.00059 0.5000
 1239:  12  7  5  0 11  6  6  0              126602.29900  126602.33286   -0.03386    0.01500   0.00077  126602.29959   -0.00059 0.5000
 1240:  40 11 29  0 40 10 30  0              126655.51200  126655.52188   -0.00988    0.01500   0.00101
 1241:  33  6 28  0 32  6 27  0              126702.49600  126702.50414   -0.00814    0.01000   0.00042
 1242:  40 11 30  0 40 10 31  0              126721.84900  126721.83296    0.01604    0.01500   0.00101
 1243:  33  8 25  0 32  8 24  0              126735.31200  126735.31383   -0.00183    0.01000   0.00042
 1244:  33  4 29  0 32  4 28  0              126899.89400  126899.89165    0.00235    0.01000   0.00047
 1245:  33  7 27  0 32  7 26  0              127009.81000  127009.81030   -0.00030    0.01000   0.00042
 1246:  39 11 28  0 39 10 29  0              127145.47700  127145.48534   -0.00834    0.01500   0.00099
 1247:  39 11 29  0 39 10 30  0              127186.51300  127186.49561    0.01739    0.01500   0.00099
 1248:  32  5 27  0 31  5 26  0              127221.65400  127221.65602   -0.00202    0.01000   0.00043
 1249:  38 11 27  0 38 10 28  0              127589.45800  127589.46086   -0.00286    0.01500   0.00097
 1250:  38 11 28  0 38 10 29  0              127614.41300  127614.41941   -0.00641    0.01500   0.00097
 1251:   9  8  2  0  8  7  1  0              127813.43700  127813.43039    0.00661    0.01500   0.00082  127813.43040    0.00660 0.5000
 1252:   9  8  1  0  8  7  2  0              127813.43700  127813.43040    0.00660    0.01500   0.00082  127813.43040    0.00660 0.5000
 1253:  37 11 26  0 37 10 27  0              127992.43700  127992.45245   -0.01545    0.01500   0.00096
 1254:  35  4 31  0 34  5 30  0              128007.39900  128007.40342   -0.00442    0.01500   0.00058
 1255:  37 11 27  0 37 10 28  0              128007.40000  128007.39103    0.00897    0.01500   0.00096
 1256:  37  5 32  0 36  6 31  0              128064.10800  128064.11102   -0.00302    0.01500   0.00132
 1257:  33  7 26  0 32  7 25  0              128086.15400  128086.15674   -0.00274    0.01000   0.00048
 1258:  35  3 32  0 34  4 31  0              128238.12800  128238.13325   -0.00525    0.01500   0.00047
 1259:  34 33  1  0 33 33  0  0              128288.68800  128288.67696    0.01104    0.01000   0.00121
 1260:  34 32  2  0 33 32  1  0              128299.72800  128299.71652    0.01148    0.01000   0.00109
 1261:  34 31  3  0 33 31  2  0              128311.50900  128311.50932   -0.00032    0.01000   0.00098
 1262:  34 30  4  0 33 30  3  0              128324.17000  128324.16876    0.00124    0.01000   0.00090
 1263:  34 29  5  0 33 29  4  0              128337.82800  128337.82820   -0.00020    0.01000   0.00082
 1264:  34 28  6  0 33 28  5  0              128352.64600  128352.64535    0.00065    0.01000   0.00076
 1265:  36 11 25  0 36 10 26  0              128358.57900  128358.58098   -0.00198    0.01500   0.00095
 1266:  36 11 26  0 36 10 27  0              128367.35700  128367.36853   -0.01153    0.01500   0.00095
 1267:  34 27  7  0 33 27  6  0              128368.80500  128368.80782   -0.00282    0.01000   0.00071
 1268:  34 26  8  0 33 26  7  0              128386.54200  128386.54020    0.00180    0.01000   0.00066
 1269:  34  5 30  0 33  5 29  0              128399.76700  128399.76563    0.00137    0.01000   0.00045
 1270:  34 25  9  0 33 25  8  0              128406.11200  128406.11323   -0.00123    0.01000   0.00062
 1271:  34 24 10  0 33 24  9  0              128427.85300  128427.85567   -0.00267    0.01000   0.00059
 1272:  22  5 18  0 21  4 17  0              128434.35600  128434.35714   -0.00114    0.01500   0.00095
 1273:  34 23 11  0 33 23 10  0              128452.17000  128452.17005   -0.00005    0.01000   0.00056
 1274:  34 22 12  0 33 22 11  0              128479.55500  128479.55349    0.00151    0.01000   0.00053
 1275:  38  0 38  0 37  1 37  0              128482.83000  128482.82382    0.00618    0.01000   0.00072  128482.82745    0.00255 0.2500
 1276:  38  1 38  0 37  0 37  0              128482.83000  128482.83108   -0.00108    0.01000   0.00072  128482.82745    0.00255 0.2500
 1277:  38  1 38  0 37  1 37  0              128482.83000  128482.82658    0.00342    0.01000   0.00072  128482.82745    0.00255 0.2500
 1278:  38  0 38  0 37  0 37  0              128482.83000  128482.82831    0.00169    0.01000   0.00072  128482.82745    0.00255 0.2500
 1279:  37  1 36  0 36  2 35  0              128492.45000  128492.42894    0.02106    0.01500   0.00058
 1280:  37  2 36  0 36  2 35  0              128492.73300  128492.74791   -0.01491    0.01000   0.00058
 1281:  37  1 36  0 36  1 35  0              128492.92100  128492.93077   -0.00977    0.01000   0.00058
 1282:  37  2 36  0 36  1 35  0              128493.24700  128493.24975   -0.00275    0.01500   0.00058
 1283:  34 21 13  0 33 21 12  0              128510.61000  128510.62597   -0.01597    0.01000   0.00050
 1284:  36  2 34  0 35  3 33  0              128522.28300  128522.28353   -0.00053    0.01500   0.00051
 1285:  36  3 34  0 35  3 33  0              128537.58300  128537.59643   -0.01343    0.01000   0.00051
 1286:  36  2 34  0 35  2 33  0              128545.43100  128545.42889    0.00211    0.01000   0.00051
 1287:  34 20 14  0 33 20 13  0              128546.16700  128546.16890   -0.00190    0.01000   0.00047
 1288:  36  3 34  0 35  2 33  0              128560.73400  128560.74179   -0.00779    0.01500   0.00051
 1289:  34 19 15  0 33 19 14  0              128587.18100  128587.17884    0.00216    0.01000   0.00045
 1290:  35  4 32  0 34  4 31  0              128624.98400  128624.97843    0.00557    0.01000   0.00048
 1291:  34 18 16  0 33 18 15  0              128634.94400  128634.94370    0.00030    0.01000   0.00043
 1292:  34 17 17  0 33 17 16  0              128691.15300  128691.15279    0.00021    0.01000   0.00041
 1293:  35 11 25  0 35 10 26  0              128696.36900  128696.37734   -0.00834    0.01500   0.00094
 1294:  34 16 18  0 33 16 17  0              128758.06200  128758.05994    0.00206    0.01000   0.00040
 1295:  35  3 32  0 34  3 31  0              128792.80000  128792.80171   -0.00171    0.01000   0.00049
 1296:  34 15 19  0 33 15 18  0              128838.73000  128838.73175   -0.00175    0.01000   0.00039
 1297:  16  6 11  0 15  5 10  0              128844.04000  128844.06583   -0.02583    0.01500   0.00072
 1298:  34 14 20  0 33 14 19  0              128937.43600  128937.43835   -0.00235    0.01000   0.00038
 1299:  34 11 23  0 34 10 24  0              128993.54300  128993.56164   -0.01864    0.01500   0.00093
 1300:  34 11 24  0 34 10 25  0              128996.44300  128996.43906    0.00394    0.01500   0.00093
 1301:  34 13 21  0 33 13 20  0              129060.29500  129060.29361    0.00139    0.01000   0.00038
 1302:  35  4 32  0 34  3 31  0              129179.64900  129179.64688    0.00212    0.01500   0.00050
 1303:  33 11 23  0 33 10 24  0              129269.51100  129269.52524   -0.01424    0.01500   0.00093
 1304:  23  5 19  0 22  4 18  0              129363.05700  129363.04982    0.00718    0.01500   0.00104
 1305:  34 11 24  0 33 11 23  0              129419.67300  129419.64319    0.02981    0.01000   0.00038  129419.67823   -0.00523 0.5000
 1306:  34 11 23  0 33 11 22  0              129419.67300  129419.71327   -0.04027    0.01000   0.00038  129419.67823   -0.00523 0.5000
 1307:  32 11 21  0 32 10 22  0              129516.63600  129516.65975   -0.02375    0.01500   0.00092
 1308:  32 11 22  0 32 10 23  0              129517.52700  129517.52949   -0.00249    0.01500   0.00092
 1309:  34 10 25  0 33 10 24  0              129692.73900  129692.72938    0.00962    0.01000   0.00039
 1310:  34 10 24  0 33 10 23  0              129694.08000  129694.07815    0.00185    0.01000   0.00039
 1311:  30 11 19  0 30 10 20  0              129945.15400  129945.15580   -0.00180    0.01500   0.00092
 1312:  30 11 20  0 30 10 21  0              129945.38300  129945.39619   -0.01319    0.01500   0.00092
 1313:  24  5 20  0 23  4 19  0              129979.02100  129979.01782    0.00318    0.01500   0.00111
 1314:  34  4 30  0 33  4 29  0              130012.10600  130012.09392    0.01208    0.01000   0.00049
 1315:  34  9 26  0 33  9 25  0              130069.50000  130069.49904    0.00096    0.01000   0.00041
 1316:  34  9 25  0 33  9 24  0              130089.40500  130089.40801   -0.00301    0.01000   0.00041
 1317:  29 11 18  0 29 10 19  0              130128.49300  130128.44104    0.05196    0.01500   0.00092  130128.50193   -0.00893 0.5000
 1318:  29 11 19  0 29 10 20  0              130128.49300  130128.56281   -0.06981    0.01500   0.00092  130128.50193   -0.00893 0.5000
 1319:  28 11 17  0 28 10 18  0              130293.23400  130293.19831    0.03569    0.01500   0.00092  130293.22833    0.00567 0.5000
 1320:  28 11 18  0 28 10 19  0              130293.23400  130293.25835   -0.02435    0.01500   0.00092  130293.22833    0.00567 0.5000
 1321:  25  5 21  0 24  4 20  0              130344.23800  130344.24737   -0.00937    0.01500   0.00118
 1322:  13  7  7  0 12  6  6  0              130359.58400  130359.48176    0.10224    0.01500   0.00077  130359.58168    0.00232 0.5000
 1323:  13  7  6  0 12  6  7  0              130359.58400  130359.68160   -0.09760    0.01500   0.00077  130359.58168    0.00232 0.5000
 1324:  34  6 29  0 33  6 28  0              130426.30500  130426.30626   -0.00126    0.01000   0.00043
 1325:  27 11 16  0 27 10 17  0              130440.88200  130440.86844    0.01356    0.01500   0.00093  130440.88281   -0.00081 0.5000
 1326:  27 11 17  0 27 10 18  0              130440.88200  130440.89718   -0.01518    0.01500   0.00093  130440.88281   -0.00081 0.5000
 1327:  26  5 22  0 25  4 21  0              130530.65000  130530.64694    0.00306    0.01500   0.00123
 1328:  34  8 27  0 33  8 26  0              130560.42500  130560.41891    0.00609    0.01000   0.00042
 1329:  26 11 15  0 26 10 16  0              130572.79700  130572.79452    0.00248    0.01500   0.00093  130572.80119   -0.00419 0.5000
 1330:  26 11 16  0 26 10 17  0              130572.79700  130572.80786   -0.01086    0.01500   0.00093  130572.80119   -0.00419 0.5000
 1331:  27  5 23  0 26  4 22  0              130617.14200  130617.12952    0.01248    0.01500   0.00126
 1332:  33  6 27  0 32  6 26  0              130679.09700  130679.09563    0.00137    0.01000   0.00052
 1333:  28  5 24  0 27  4 23  0              130687.63900  130687.63890    0.00010    0.01500   0.00126
 1334:  25 11 14  0 25 10 15  0              130690.22900  130690.23297   -0.00397    0.01500   0.00093  130690.23596   -0.00696 0.5000
 1335:  25 11 15  0 25 10 16  0              130690.22900  130690.23895   -0.00995    0.01500   0.00093  130690.23596   -0.00696 0.5000
 1336:  34  8 26  0 33  8 25  0              130773.92200  130773.91733    0.00467    0.01000   0.00043
 1337:  24 11 13  0 24 10 14  0              130794.36200  130794.36217   -0.00017    0.01500   0.00094  130794.36347   -0.00147 0.5000
 1338:  24 11 14  0 24 10 15  0              130794.36200  130794.36476   -0.00276    0.01500   0.00094  130794.36347   -0.00147 0.5000
 1339:  29  5 25  0 28  4 24  0              130828.73600  130828.73457    0.00143    0.01500   0.00125
 1340:  23 11 12  0 23 10 13  0              130886.30000  130886.28951    0.01049    0.01500   0.00094  130886.29004    0.00996 0.5000
 1341:  23 11 13  0 23 10 14  0              130886.30000  130886.29058    0.00942    0.01500   0.00094  130886.29004    0.00996 0.5000
 1342:  34  7 28  0 33  7 27  0              130933.92700  130933.91463    0.01237    0.01000   0.00043
 1343:  33  5 28  0 32  5 27  0              130944.60600  130944.60893   -0.00293    0.01000   0.00043
 1344:  22 11 11  0 22 10 12  0              130967.05900  130967.05699    0.00201    0.01500   0.00095
 1345:  21 11 10  0 21 10 11  0              131037.66000  131037.64599    0.01401    0.01500   0.00095
 1346:  20 11  9  0 20 10 10  0              131098.97900  131098.98116   -0.00216    0.01500   0.00096
 1347:  30  5 26  0 29  4 25  0              131125.40800  131125.41505   -0.00705    0.01500   0.00120
 1348:  19 11  8  0 19 10  9  0              131151.92600  131151.93368   -0.00768    0.01500   0.00097
 1349:  18 11  7  0 18 10  8  0              131197.31800  131197.32403   -0.00603    0.01500   0.00097
 1350:  17 11  6  0 17 10  7  0              131235.93100  131235.92425    0.00675    0.01500   0.00098
 1351:  16 11  5  0 16 10  6  0              131268.45000  131268.45990   -0.00990    0.01500   0.00099
 1352:  15 11  4  0 15 10  5  0              131295.60900  131295.61165   -0.00265    0.01500   0.00099
 1353:  14 11  3  0 14 10  4  0              131318.00500  131318.01658   -0.01158    0.01500   0.00100
 1354:  13 11  2  0 13 10  3  0              131336.27300  131336.26925    0.00375    0.01500   0.00101
 1355:  10  8  3  0  9  7  2  0              131586.84100  131586.84053    0.00047    0.01500   0.00083  131586.84054    0.00046 0.5000
 1356:  10  8  2  0  9  7  3  0              131586.84100  131586.84056    0.00044    0.01500   0.00083  131586.84054    0.00046 0.5000
 1357:  31  5 27  0 30  4 26  0              131654.66800  131654.66785    0.00015    0.01500   0.00113
 1358:  36  3 33  0 35  4 32  0              131696.69700  131696.70114   -0.00414    0.01500   0.00049
 1359:  39  1 39  0 38  1 38  0              131818.83400  131818.83209    0.00191    0.01000   0.00076  131818.83263    0.00137 0.2500
 1360:  39  0 39  0 38  0 38  0              131818.83400  131818.83316    0.00084    0.01000   0.00076  131818.83263    0.00137 0.2500
 1361:  39  0 39  0 38  1 38  0              131818.83400  131818.83040    0.00360    0.01000   0.00076  131818.83263    0.00137 0.2500
 1362:  39  1 39  0 38  0 38  0              131818.83400  131818.83486   -0.00086    0.01000   0.00076  131818.83263    0.00137 0.2500
 1363:  38  1 37  0 37  2 36  0              131827.85700  131827.86775   -0.01075    0.01500   0.00061
 1364:  38  2 37  0 37  2 36  0              131828.05900  131828.07007   -0.01107    0.01000   0.00061
 1365:  38  1 37  0 37  1 36  0              131828.19000  131828.18673    0.00327    0.01000   0.00061
 1366:  38  2 37  0 37  1 36  0              131828.38900  131828.38905   -0.00005    0.01500   0.00061
 1367:  35  5 31  0 34  5 30  0              131844.90300  131844.90386   -0.00086    0.01000   0.00047
 1368:  37  2 35  0 36  3 34  0              131860.38100  131860.36544    0.01556    0.01500   0.00053
 1369:  37  3 35  0 36  3 34  0              131870.46200  131870.45892    0.00308    0.01000   0.00053
 1370:  37  2 35  0 36  2 34  0              131875.68200  131875.67833    0.00367    0.01000   0.00053
 1371:  37  3 35  0 36  2 34  0              131885.76700  131885.77182   -0.00482    0.01500   0.00053
 1372:  36  4 33  0 35  4 32  0              131964.71800  131964.71525    0.00275    0.01000   0.00050
 1373:  35 34  1  0 34 34  0  0              132057.33100  132057.32881    0.00219    0.01000   0.00135
 1374:  35 33  2  0 34 33  1  0              132068.49400  132068.49209    0.00191    0.01000   0.00120
 1375:  35 32  3  0 34 32  2  0              132080.38000  132080.37627    0.00373    0.01000   0.00108
 1376:  36  3 33  0 35  3 32  0              132083.53900  132083.54632   -0.00732    0.01000   0.00050
 1377:  35 31  4  0 34 31  3  0              132093.09500  132093.08709    0.00791    0.01000   0.00098
 1378:  35 30  5  0 34 30  4  0              132106.74700  132106.74830   -0.00130    0.01000   0.00089
 1379:  35 29  6  0 34 29  5  0              132121.50300  132121.50541   -0.00241    0.01000   0.00082
 1380:  35 28  7  0 34 28  6  0              132137.52700  132137.53052   -0.00352    0.01000   0.00076
 1381:  35 27  8  0 34 27  7  0              132155.02800  132155.02838   -0.00038    0.01000   0.00071
 1382:  35 26  9  0 34 26  8  0              132174.24300  132174.24409   -0.00109    0.01000   0.00067
 1383:  35 25 10  0 34 25  9  0              132195.47500  132195.47318    0.00182    0.01000   0.00063
 1384:  35 24 11  0 34 24 10  0              132219.07600  132219.07458    0.00142    0.01000   0.00059
 1385:  35 23 12  0 34 23 11  0              132245.48600  132245.48778   -0.00178    0.01000   0.00056
 1386:  35 22 13  0 34 22 12  0              132275.25300  132275.25571   -0.00271    0.01000   0.00053
 1387:  35 21 14  0 34 21 13  0              132309.05900  132309.05562    0.00338    0.01000   0.00051
 1388:  35 20 15  0 34 20 14  0              132347.74300  132347.74140    0.00160    0.01000   0.00048
 1389:  36  4 33  0 35  3 32  0              132351.56500  132351.56042    0.00458    0.01500   0.00051
 1390:  35 19 16  0 34 19 15  0              132392.41000  132392.40254    0.00746    0.01000   0.00046
 1391:  34  7 27  0 33  7 26  0              132393.99900  132394.00109   -0.00209    0.01000   0.00051
 1392:  36  4 32  0 35  5 31  0              132424.88200  132424.87688    0.00512    0.01500   0.00054
 1393:  35 18 17  0 34 18 16  0              132444.44200  132444.44777   -0.00577    0.01000   0.00044
 1394:  17  6 12  0 16  5 11  0              132454.85800  132454.87877   -0.02077    0.01500   0.00072
 1395:  32  5 28  0 31  4 27  0              132477.67400  132477.65280    0.02120    0.01500   0.00105
 1396:  35 17 18  0 34 17 17  0              132505.72700  132505.72624    0.00076    0.01000   0.00042
 1397:  35 16 19  0 34 16 18  0              132578.71200  132578.70742    0.00458    0.01000   0.00040
 1398:  35 15 20  0 34 15 19  0              132666.75000  132666.75573   -0.00573    0.01000   0.00039
 1399:  35 14 21  0 34 14 20  0              132774.57900  132774.56457    0.01443    0.01000   0.00039
 1400:  35 13 22  0 34 13 21  0              132908.86800  132908.87152   -0.00352    0.01000   0.00038
 1401:  35 12 24  0 34 12 23  0              133079.69600  133079.69792   -0.00192    0.01000   0.00039  133079.70078   -0.00478 0.5000
 1402:  35 12 23  0 34 12 22  0              133079.69600  133079.70363   -0.00763    0.01000   0.00039  133079.70078   -0.00478 0.5000
 1403:  35 11 25  0 34 11 24  0              133302.67400  133302.61878    0.05522    0.01000   0.00039  133302.68358   -0.00958 0.5000
 1404:  35 11 24  0 34 11 23  0              133302.67400  133302.74839   -0.07439    0.01000   0.00039  133302.68358   -0.00958 0.5000
 1405:  35 10 26  0 34 10 25  0              133602.68800  133602.68050    0.00750    0.01000   0.00040
 1406:  35 10 25  0 34 10 24  0              133605.00400  133605.00913   -0.00513    0.01000   0.00040
 1407:  33  5 29  0 32  4 28  0              133632.81300  133632.83227   -0.01927    0.01500   0.00096
 1408:  35  9 27  0 34  9 26  0              134015.20100  134015.18814    0.01286    0.01000   0.00042
 1409:  35  9 26  0 34  9 25  0              134047.18200  134047.18116    0.00084    0.01000   0.00042
 1410:  35  6 30  0 34  6 29  0              134108.32400  134108.32509   -0.00109    0.01000   0.00045
 1411:  38  5 33  0 37  6 32  0              134374.36900  134374.36735    0.00165    0.01500   0.00117
 1412:  34  5 29  0 33  5 28  0              134529.52100  134529.51938    0.00162    0.01000   0.00044
 1413:  35  8 28  0 34  8 27  0              134532.23100  134532.22665    0.00435    0.01000   0.00043
 1414:  35  7 29  0 34  7 28  0              134839.19600  134839.19715   -0.00115    0.01000   0.00044
 1415:  35  8 27  0 34  8 26  0              134848.67300  134848.67322   -0.00022    0.01000   0.00045
 1416:  34  6 28  0 33  6 27  0              135009.97200  135009.97060    0.00140    0.01000   0.00052
 1417:  37  3 34  0 36  4 33  0              135115.78900  135115.78672    0.00228    0.01500   0.00051
 1418:  34  5 30  0 33  4 29  0              135132.69900  135132.70624   -0.00724    0.01500   0.00087
 1419:  40  1 40  0 39  1 39  0              135154.75900  135154.75539    0.00361    0.01000   0.00080  135154.75572    0.00328 0.2500
 1420:  40  0 40  0 39  0 39  0              135154.75900  135154.75605    0.00295    0.01000   0.00080  135154.75572    0.00328 0.2500
 1421:  40  0 40  0 39  1 39  0              135154.75900  135154.75435    0.00465    0.01000   0.00080  135154.75572    0.00328 0.2500
 1422:  40  1 40  0 39  0 39  0              135154.75900  135154.75709    0.00191    0.01000   0.00080  135154.75572    0.00328 0.2500
 1423:  39  2 38  0 38  2 37  0              135163.40200  135163.36352    0.03848    0.01000   0.00064  135163.40064    0.00136 0.2500
 1424:  39  1 38  0 38  1 37  0              135163.40200  135163.43777   -0.03577    0.01000   0.00064  135163.40064    0.00136 0.2500
 1425:  39  1 38  0 38  2 37  0              135163.40200  135163.23545    0.16655    0.01000   0.00064  135163.40064    0.00136 0.2500
 1426:  39  2 38  0 38  1 37  0              135163.40200  135163.56584   -0.16384    0.01000   0.00064  135163.40064    0.00136 0.2500
 1427:  38  2 36  0 37  3 35  0              135196.65700  135196.65624    0.00076    0.01500   0.00056
 1428:  38  3 36  0 37  3 35  0              135203.30300  135203.28637    0.01663    0.01000   0.00056
 1429:  38  2 36  0 37  2 35  0              135206.75300  135206.74972    0.00328    0.01000   0.00056
 1430:  38  3 36  0 37  2 35  0              135213.37400  135213.37986   -0.00586    0.01500   0.00056
 1431:  36  5 32  0 35  5 31  0              135263.61000  135263.60596    0.00404    0.01000   0.00048
 1432:  37  4 34  0 36  4 33  0              135300.37000  135300.35273    0.01727    0.01000   0.00052
 1433:  11  8  4  0 10  7  3  0              135358.74400  135358.74342    0.00058    0.01500   0.00083  135358.74349    0.00051 0.5000
 1434:  11  8  3  0 10  7  4  0              135358.74400  135358.74357    0.00043    0.01500   0.00083  135358.74349    0.00051 0.5000
 1435:  37  3 34  0 36  3 33  0              135383.80600  135383.80082    0.00518    0.01000   0.00052
 1436:  37  4 34  0 36  3 33  0              135568.37300  135568.36683    0.00617    0.01500   0.00053
 1437:  36 35  1  0 35 35  0  0              135825.60100  135825.60337   -0.00237    0.01000   0.00151
 1438:  36 34  2  0 35 34  1  0              135836.90300  135836.89737    0.00563    0.01000   0.00134
 1439:  36 33  3  0 35 33  2  0              135848.88500  135848.88194    0.00306    0.01000   0.00120
 1440:  36 32  4  0 35 32  3  0              135861.66000  135861.65594    0.00406    0.01000   0.00107
 1441:  36 30  6  0 35 30  5  0              135890.04900  135890.05226   -0.00326    0.01000   0.00089
 1442:  36 29  7  0 35 29  6  0              135905.96600  135905.96766   -0.00166    0.01000   0.00082
 1443:  36 28  8  0 35 28  7  0              135923.26600  135923.26803   -0.00203    0.01000   0.00076
 1444:  36 27  9  0 35 27  8  0              135942.17900  135942.17626    0.00274    0.01000   0.00071
 1445:  36 26 10  0 35 26  9  0              135962.96100  135962.95926    0.00174    0.01000   0.00067
 1446:  36 25 11  0 35 25 10  0              135985.93100  135985.93883   -0.00783    0.01000   0.00063
 1447:  18  6 13  0 17  5 12  0              136003.21300  136003.21183    0.00117    0.01500   0.00072
 1448:  36 24 12  0 35 24 11  0              136011.50300  136011.50587   -0.00287    0.01000   0.00060
 1449:  36 23 13  0 35 23 12  0              136040.14600  136040.13915    0.00685    0.01000   0.00057
 1450:  36 22 14  0 35 22 13  0              136072.44000  136072.43022    0.00978    0.01000   0.00054
 1451:  36 21 15  0 35 21 14  0              136109.11600  136109.11721   -0.00121    0.01000   0.00052
 1452:  36 20 16  0 35 20 15  0              136151.13100  136151.13110   -0.00010    0.01000   0.00049
 1453:  36 19 17  0 35 19 16  0              136199.66900  136199.66030    0.00870    0.01000   0.00047
 1454:  36 18 18  0 35 18 17  0              136256.24300  136256.24235    0.00065    0.01000   0.00045
 1455:  36  4 32  0 35  4 31  0              136262.37700  136262.37732   -0.00032    0.01000   0.00051
 1456:  36 17 19  0 35 17 18  0              136322.90500  136322.89709    0.00791    0.01000   0.00043
 1457:  36 16 20  0 35 16 19  0              136402.32800  136402.32479    0.00321    0.01000   0.00041
 1458:  36 15 21  0 35 15 20  0              136498.23300  136498.20960    0.02340    0.01500   0.00040
 1459:  37  4 33  0 36  5 32  0              136583.91100  136583.90259    0.00841    0.01500   0.00052
 1460:  36 14 22  0 35 14 21  0              136615.69000  136615.70131   -0.01131    0.01000   0.00040
 1461:  36 13 23  0 35 13 22  0              136762.21300  136762.21401   -0.00101    0.01000   0.00040
 1462:  35  7 28  0 34  7 27  0              136767.85900  136767.86653   -0.00753    0.01000   0.00054
 1463:  35  5 31  0 34  4 30  0              136965.52200  136965.51619    0.00581    0.01500   0.00079
 1464:  36 10 27  0 35 10 26  0              137521.81200  137521.81611   -0.00411    0.01000   0.00042
 1465:  36 10 26  0 35 10 25  0              137525.76000  137525.76215   -0.00215    0.01000   0.00042
 1466:  36  6 31  0 35  6 30  0              137747.66400  137747.66237    0.00163    0.01000   0.00046
 1467:  15  7  9  0 14  6  8  0              137848.70000  137848.67324    0.02676    0.01500   0.00078
 1468:  15  7  8  0 14  6  9  0              137850.02800  137850.02893   -0.00093    0.01500   0.00078
 1469:  36  9 28  0 35  9 27  0              137971.31700  137971.31282    0.00418    0.01000   0.00043
 1470:  35  5 30  0 34  5 29  0              137978.63700  137978.62343    0.01357    0.01000   0.00046
 1471:  36  9 27  0 35  9 26  0              138021.82200  138021.81494    0.00706    0.01000   0.00044
 1472:  45 12 33  0 45 11 34  0              138154.22300  138154.22447   -0.00147    0.01500   0.00122
 1473:  45 12 34  0 45 11 35  0              138210.97300  138210.98407   -0.01107    0.01500   0.00122
 1474:  41  1 41  0 40  1 40  0              138490.59500  138490.59378    0.00122    0.01000   0.00085  138490.59398    0.00102 0.2500
 1475:  41  0 41  0 40  0 40  0              138490.59500  138490.59418    0.00082    0.01000   0.00085  138490.59398    0.00102 0.2500
 1476:  41  0 41  0 40  1 40  0              138490.59500  138490.59314    0.00186    0.01000   0.00085  138490.59398    0.00102 0.2500
 1477:  41  1 41  0 40  0 40  0              138490.59500  138490.59482    0.00018    0.01000   0.00085  138490.59398    0.00102 0.2500
 1478:  40  2 39  0 39  2 38  0              138498.64900  138498.62191    0.02709    0.01000   0.00067  138498.64549    0.00351 0.2500
 1479:  40  1 39  0 39  1 38  0              138498.64900  138498.66907   -0.02007    0.01000   0.00067  138498.64549    0.00351 0.2500
 1480:  40  1 39  0 39  2 38  0              138498.64900  138498.54100    0.10800    0.01000   0.00067  138498.64549    0.00351 0.2500
 1481:  40  2 39  0 39  1 38  0              138498.64900  138498.74998   -0.10098    0.01000   0.00067  138498.64549    0.00351 0.2500
 1482:  36  8 29  0 35  8 28  0              138506.72400  138506.70431    0.01969    0.01000   0.00045
 1483:  39  2 37  0 38  3 36  0              138531.81900  138531.80476    0.01424    0.01500   0.00058
 1484:  39  3 37  0 38  3 36  0              138536.14700  138536.14583    0.00117    0.01000   0.00058
 1485:  39  2 37  0 38  2 36  0              138538.44300  138538.43489    0.00811    0.01000   0.00058
 1486:  39  3 37  0 38  2 36  0              138542.76900  138542.77596   -0.00696    0.01500   0.00058
 1487:  38  4 35  0 37  4 34  0              138633.17500  138633.17744   -0.00244    0.01000   0.00054
 1488:  37  5 33  0 36  5 32  0              138659.88900  138659.88599    0.00301    0.01000   0.00050
 1489:  44 12 32  0 44 11 33  0              138687.42300  138687.41148    0.01152    0.01500   0.00119
 1490:  38  3 35  0 37  3 34  0              138691.34800  138691.34595    0.00205    0.01000   0.00054
 1491:  36  7 30  0 35  7 29  0              138720.20100  138720.19994    0.00106    0.01000   0.00045
 1492:  44 12 33  0 44 11 34  0              138722.96800  138722.97857   -0.01057    0.01500   0.00119
 1493:  38  4 35  0 37  3 34  0              138817.74900  138817.74346    0.00554    0.01500   0.00054
 1494:  36  8 28  0 35  8 27  0              138966.78100  138966.77519    0.00581    0.01000   0.00048
 1495:  36  5 32  0 35  4 31  0              139101.11400  139101.10641    0.00759    0.01500   0.00072
 1496:  12  8  5  0 11  7  4  0              139128.38100  139128.38158   -0.00058    0.01500   0.00083  139128.38193   -0.00093 0.5000
 1497:  12  8  4  0 11  7  5  0              139128.38100  139128.38229   -0.00129    0.01500   0.00083  139128.38193   -0.00093 0.5000
 1498:  43 12 32  0 43 11 33  0              139197.60700  139197.61966   -0.01266    0.01500   0.00116
 1499:  35  6 29  0 34  6 28  0              139254.20300  139254.20484   -0.00184    0.01000   0.00052
 1500:  37  4 33  0 36  4 32  0              139422.64000  139422.63168    0.00832    0.01000   0.00053
 1501:  19  6 14  0 18  5 13  0              139466.12400  139466.10441    0.01959    0.01500   0.00073
 1502:  37 36  1  0 36 36  0  0              139593.50500  139593.48937    0.01563    0.01000   0.00170
 1503:  37 35  2  0 36 35  1  0              139604.92400  139604.92090    0.00310    0.01000   0.00150
 1504:  37 34  3  0 36 34  2  0              139616.99400  139617.01452   -0.02052    0.01000   0.00133
 1505:  37 33  4  0 36 33  3  0              139629.87000  139629.86283    0.00717    0.01000   0.00118
 1506:  37 32  5  0 36 32  4  0              139643.57600  139643.57320    0.00280    0.01000   0.00106
 1507:  37 31  6  0 36 31  5  0              139658.27200  139658.27061    0.00139    0.01000   0.00096
 1508:  37 30  7  0 36 30  6  0              139674.10500  139674.10132    0.00368    0.01000   0.00088
 1509:  37 29  8  0 36 29  7  0              139691.23600  139691.23738   -0.00138    0.01000   0.00081
 1510:  37 28  9  0 36 28  8  0              139709.88300  139709.88226    0.00074    0.01000   0.00076
 1511:  37 27 10  0 36 27  9  0              139730.27800  139730.27808   -0.00008    0.01000   0.00071
 1512:  37 26 11  0 36 26 10  0              139752.70800  139752.71480   -0.00680    0.01000   0.00067
 1513:  37 25 12  0 36 25 11  0              139777.54300  139777.54205    0.00095    0.01000   0.00064
 1514:  37 24 13  0 36 24 12  0              139805.18900  139805.18464    0.00436    0.01000   0.00061
 1515:  37 23 14  0 36 23 13  0              139836.16400  139836.16294    0.00106    0.01000   0.00058
 1516:  37 22 15  0 36 22 14  0              139871.12500  139871.12010    0.00490    0.01000   0.00055
 1517:  37 21 16  0 36 21 15  0              139910.86300  139910.85883    0.00417    0.01000   0.00053
 1518:  37 20 17  0 36 20 16  0              139956.39300  139956.39204    0.00096    0.01000   0.00050
 1519:  37 19 18  0 36 19 17  0              140009.01500  140009.01329    0.00171    0.01000   0.00048
 1520:  41 12 29  0 41 11 30  0              140034.32100  140034.33090   -0.00990    0.01500   0.00112
 1521:  37 18 19  0 36 18 18  0              140070.39500  140070.39735   -0.00235    0.01000   0.00046
 1522:  37 17 20  0 36 17 19  0              140142.74500  140142.74618   -0.00118    0.01000   0.00044
 1523:  39  5 34  0 38  6 33  0              140215.79800  140215.79853   -0.00053    0.01500   0.00102
 1524:  37 16 21  0 36 16 20  0              140229.00900  140229.00692    0.00208    0.01000   0.00043
 1525:   9  9  1  0  8  8  0  0              140324.69100  140324.68707    0.00393    0.01500   0.00088  140324.68707    0.00393 0.5000
 1526:   9  9  0  0  8  8  1  0              140324.69100  140324.68707    0.00393    0.01500   0.00088  140324.68707    0.00393 0.5000
 1527:  37 15 22  0 36 15 21  0              140333.20900  140333.20690    0.00210    0.01000   0.00042
 1528:  40 12 28  0 40 11 29  0              140411.65300  140411.65294    0.00006    0.01500   0.00110
 1529:  40 12 29  0 40 11 30  0              140416.39200  140416.39457   -0.00257    0.01500   0.00110
 1530:  37 14 23  0 36 14 22  0              140460.98800  140460.98796    0.00004    0.01000   0.00041
 1531:  38  4 34  0 37  5 33  0              140534.74000  140534.72670    0.01330    0.01500   0.00052
 1532:  37 13 24  0 36 13 23  0              140620.50400  140620.49843    0.00557    0.01000   0.00041
 1533:  37 12 26  0 36 12 25  0              140823.97300  140823.95887    0.01413    0.01000   0.00041  140823.96935    0.00365 0.5000
 1534:  37 12 25  0 36 12 24  0              140823.97300  140823.97983   -0.00683    0.01000   0.00041  140823.96935    0.00365 0.5000
 1535:  37 11 27  0 36 11 26  0              141090.53500  141090.53561   -0.00061    0.01000   0.00042
 1536:  37 11 26  0 36 11 25  0              141090.96300  141090.95340    0.00960    0.01000   0.00042
 1537:  36  7 29  0 35  7 28  0              141197.55000  141197.55002   -0.00002    0.01000   0.00058
 1538:  36  5 31  0 35  5 30  0              141301.96600  141301.95644    0.00956    0.01000   0.00048
 1539:  37  6 32  0 36  6 31  0              141344.54800  141344.55150   -0.00350    0.01000   0.00048
 1540:  37 10 28  0 36 10 27  0              141450.50700  141450.51311   -0.00611    0.01000   0.00043
 1541:  37 10 27  0 36 10 26  0              141457.08500  141457.08193    0.00307    0.01000   0.00043
 1542:  37  5 33  0 36  4 32  0              141498.60700  141498.61508   -0.00808    0.01500   0.00068
 1543:  42  1 42  0 41  1 41  0              141826.34900  141826.34461    0.00439    0.01000   0.00090  141826.34473    0.00427 0.2500
 1544:  42  0 42  0 41  0 41  0              141826.34900  141826.34486    0.00414    0.01000   0.00090  141826.34473    0.00427 0.2500
 1545:  42  0 42  0 41  1 41  0              141826.34900  141826.34422    0.00478    0.01000   0.00090  141826.34473    0.00427 0.2500
 1546:  42  1 42  0 41  0 41  0              141826.34900  141826.34525    0.00375    0.01000   0.00090  141826.34473    0.00427 0.2500
 1547:  41  2 40  0 40  2 39  0              141833.85500  141833.83865    0.01635    0.01000   0.00071  141833.85359    0.00141 0.2500
 1548:  41  1 40  0 40  1 39  0              141833.85500  141833.86853   -0.01353    0.01000   0.00071  141833.85359    0.00141 0.2500
 1549:  41  1 40  0 40  2 39  0              141833.85500  141833.78762    0.06738    0.01000   0.00071  141833.85359    0.00141 0.2500
 1550:  41  2 40  0 40  1 39  0              141833.85500  141833.91956   -0.06456    0.01000   0.00071  141833.85359    0.00141 0.2500
 1551:  40  2 38  0 39  3 37  0              141866.25800  141866.23973    0.01827    0.01500   0.00061
 1552:  40  3 38  0 39  3 37  0              141869.08300  141869.07341    0.00959    0.01000   0.00061
 1553:  40  2 38  0 39  2 37  0              141870.58100  141870.58080    0.00020    0.01000   0.00061
 1554:  37  9 29  0 36  9 28  0              141937.56000  141937.56367   -0.00367    0.01000   0.00045
 1555:  39  4 36  0 38  4 35  0              141964.16800  141964.15650    0.01150    0.01000   0.00056
 1556:  39  3 36  0 38  3 35  0              142004.45000  142004.43343    0.01657    0.01000   0.00056
 1557:  37  9 28  0 36  9 27  0              142015.93400  142015.91323    0.02077    0.01500   0.00045
 1558:  38  5 34  0 37  5 33  0              142037.66200  142037.64594    0.01606    0.01000   0.00053
 1559:  39  4 36  0 38  3 35  0              142090.55600  142090.55401    0.00199    0.01500   0.00057
 1560:  37  8 30  0 36  8 29  0              142480.43000  142480.41997    0.01003    0.01000   0.00046
 1561:  37  7 31  0 36  7 30  0              142571.69800  142571.69409    0.00391    0.01000   0.00047
 1562:  30 12 18  0 30 11 19  0              142810.18200  142810.18360   -0.00160    0.01500   0.00105  142810.18795   -0.00595 0.5000
 1563:  30 12 19  0 30 11 20  0              142810.18200  142810.19230   -0.01030    0.01500   0.00105  142810.18795   -0.00595 0.5000
 1564:  20  6 15  0 19  5 14  0              142812.90100  142812.91625   -0.01525    0.01500   0.00074
 1565:  13  8  6  0 12  7  5  0              142894.89000  142894.88166    0.00834    0.01500   0.00083  142894.88301    0.00699 0.5000
 1566:  13  8  5  0 12  7  6  0              142894.89000  142894.88436    0.00564    0.01500   0.00083  142894.88301    0.00699 0.5000
 1567:  29 12 17  0 29 11 18  0              142947.63400  142947.62885    0.00515    0.01500   0.00105  142947.63089    0.00311 0.5000
 1568:  29 12 18  0 29 11 19  0              142947.63400  142947.63292    0.00108    0.01500   0.00105  142947.63089    0.00311 0.5000
 1569:  28 12 16  0 28 11 17  0              143071.43200  143071.42727    0.00473    0.01500   0.00105  143071.42819    0.00381 0.5000
 1570:  28 12 17  0 28 11 18  0              143071.43200  143071.42912    0.00288    0.01500   0.00105  143071.42819    0.00381 0.5000
 1571:  37  8 29  0 36  8 28  0              143136.25600  143136.25420    0.00180    0.01000   0.00051
 1572:  27 12 15  0 27 11 16  0              143182.57700  143182.58228   -0.00528    0.01500   0.00106
 1573:  26 12 14  0 26 11 15  0              143282.02100  143282.04226   -0.02126    0.01500   0.00106
 1574:  38 37  1  0 37 37  0  0              143360.96400  143360.97555   -0.01155    0.01500   0.00191
 1575:  25 12 13  0 25 11 14  0              143370.70200  143370.70447   -0.00247    0.01500   0.00107
 1576:  38 36  2  0 37 36  1  0              143372.54300  143372.55126   -0.00826    0.01500   0.00168
 1577:  38 35  3  0 37 35  2  0              143384.76100  143384.76224   -0.00124    0.01000   0.00149
 1578:  36  6 30  0 35  6 29  0              143388.64700  143388.64652    0.00048    0.01000   0.00051
 1579:  38 34  4  0 37 34  3  0              143397.70700  143397.69541    0.01159    0.01000   0.00132
 1580:  38 33  5  0 37 33  4  0              143411.45100  143411.45112   -0.00012    0.01000   0.00117
 1581:  38 32  6  0 37 32  5  0              143426.14600  143426.14568    0.00032    0.01000   0.00105
 1582:  38 31  7  0 37 31  6  0              143441.91900  143441.91453    0.00447    0.01000   0.00095
 1583:  24 12 12  0 24 11 13  0              143449.42000  143449.41852    0.00148    0.01500   0.00108
 1584:  38 30  8  0 37 30  7  0              143458.91800  143458.91617    0.00183    0.01000   0.00087
 1585:  38 29  9  0 37 29  8  0              143477.34000  143477.33703    0.00297    0.01000   0.00081
 1586:  38 28 10  0 37 28  9  0              143497.40200  143497.39765    0.00435    0.01000   0.00076
 1587:  23 12 11  0 23 11 12  0              143518.98600  143518.98921   -0.00321    0.01500   0.00108
 1588:  38 27 11  0 37 27 10  0              143519.35400  143519.36048   -0.00648    0.01000   0.00071
 1589:  38 26 12  0 37 26 11  0              143543.54200  143543.53984    0.00216    0.01000   0.00068
 1590:  38 25 13  0 37 25 12  0              143570.31600  143570.31482    0.00118    0.01000   0.00065
 1591:  38 24 14  0 37 24 13  0              143600.15000  143600.14610    0.00390    0.01000   0.00062
 1592:  38 23 15  0 37 23 14  0              143633.60400  143633.59809    0.00591    0.01000   0.00059
 1593:  21 12  9  0 21 11 10  0              143633.73000  143633.71050    0.01950    0.01500   0.00110
 1594:  38 22 16  0 37 22 15  0              143671.36600  143671.36859   -0.00259    0.01000   0.00056
 1595:  20 12  8  0 20 11  9  0              143680.26500  143680.26754   -0.00254    0.01500   0.00110
 1596:  38 21 17  0 37 21 16  0              143714.33100  143714.32882    0.00218    0.01000   0.00054
 1597:  19 12  7  0 19 11  8  0              143720.50300  143720.49756    0.00544    0.01500   0.00111
 1598:  18 12  6  0 18 11  7  0              143755.01100  143755.01249   -0.00149    0.01500   0.00112
 1599:  38 20 18  0 37 20 17  0              143763.57500  143763.57857   -0.00357    0.01000   0.00052
 1600:  17 12  5  0 17 11  6  0              143784.40500  143784.39000    0.01500    0.01500   0.00113
 1601:  16 12  4  0 16 11  5  0              143809.17500  143809.17443    0.00057    0.01500   0.00113
 1602:  38 19 19  0 37 19 18  0              143820.52200  143820.52319   -0.00119    0.01000   0.00049
 1603:  13 12  1  0 13 11  2  0              143860.92000  143860.92883   -0.00883    0.01500   0.00115
 1604:  38 18 20  0 37 18 19  0              143886.98400  143886.98342    0.00058    0.01000   0.00047
 1605:  38 17 21  0 37 17 20  0              143965.34800  143965.35545   -0.00745    0.01000   0.00045
 1606:  38 16 22  0 37 16 21  0              144058.87000  144058.85035    0.01965    0.01500   0.00044
 1607:  10  9  2  0  9  8  1  0              144098.96000  144098.95557    0.00443    0.01500   0.00088  144098.95557    0.00443 0.5000
 1608:  10  9  1  0  9  8  2  0              144098.96000  144098.95557    0.00443    0.01500   0.00088  144098.95557    0.00443 0.5000
 1609:  38  5 34  0 37  4 33  0              144113.63900  144113.62934    0.00966    0.01500   0.00065
 1610:  38 15 23  0 37 15 22  0              144171.86700  144171.86371    0.00329    0.01000   0.00043
 1611:  38 14 24  0 37 14 23  0              144310.57300  144310.56800    0.00500    0.01000   0.00042
 1612:  39  4 35  0 38  5 34  0              144322.17100  144322.17205   -0.00105    0.01500   0.00053
 1613:  38 13 26  0 37 13 25  0              144483.91400  144483.90741    0.00659    0.01000   0.00042  144483.90825    0.00575 0.5000
 1614:  38 13 25  0 37 13 24  0              144483.91400  144483.90909    0.00491    0.01000   0.00042  144483.90825    0.00575 0.5000
 1615:  37  5 32  0 36  5 31  0              144518.45600  144518.45462    0.00138    0.01000   0.00051
 1616:  38 12 27  0 37 12 26  0              144705.38400  144705.36347    0.02053    0.01000   0.00043  144705.38296    0.00104 0.5000
 1617:  38 12 26  0 37 12 25  0              144705.38400  144705.40245   -0.01845    0.01000   0.00043  144705.38296    0.00104 0.5000
 1618:  38  6 33  0 37  6 32  0              144900.30600  144900.30201    0.00399    0.01000   0.00050
 1619:  38 11 28  0 37 11 27  0              144996.15300  144996.14615    0.00685    0.01000   0.00044
 1620:  38 11 27  0 37 11 26  0              144996.87200  144996.87572   -0.00372    0.01000   0.00044
 1621:  43  1 43  0 42  1 42  0              145162.00600  145162.00528    0.00072    0.01000   0.00095  145162.00535    0.00065 0.2500
 1622:  43  0 43  0 42  0 42  0              145162.00600  145162.00543    0.00057    0.01000   0.00095  145162.00535    0.00065 0.2500
 1623:  43  0 43  0 42  1 42  0              145162.00600  145162.00504    0.00096    0.01000   0.00095  145162.00535    0.00065 0.2500
 1624:  43  1 43  0 42  0 42  0              145162.00600  145162.00567    0.00033    0.01000   0.00095  145162.00535    0.00065 0.2500
 1625:  42  2 41  0 41  2 40  0              145169.02100  145169.00715    0.01385    0.01000   0.00075  145169.01660    0.00440 0.2500
 1626:  42  1 41  0 41  1 40  0              145169.02100  145169.02605   -0.00505    0.01000   0.00075  145169.01660    0.00440 0.2500
 1627:  42  1 41  0 41  2 40  0              145169.02100  145168.97502    0.04598    0.01000   0.00075  145169.01660    0.00440 0.2500
 1628:  42  2 41  0 41  1 40  0              145169.02100  145169.05818   -0.03718    0.01000   0.00075  145169.01660    0.00440 0.2500
 1629:  41  2 39  0 40  3 38  0              145200.26000  145200.24034    0.01966    0.01500   0.00064
 1630:  41  3 39  0 40  3 38  0              145202.08300  145202.08478   -0.00178    0.01000   0.00064
 1631:  41  2 39  0 40  2 38  0              145203.09200  145203.07402    0.01798    0.01000   0.00064
 1632:  41  3 39  0 40  2 38  0              145204.92600  145204.91846    0.00754    0.01500   0.00064
 1633:  17  7 11  0 16  6 10  0              145288.74400  145288.74577   -0.00177    0.01500   0.00078
 1634:  40  4 37  0 39  4 36  0              145293.98800  145293.99748   -0.00948    0.01000   0.00059
 1635:  40  3 37  0 39  3 36  0              145321.71700  145321.71687    0.00013    0.01000   0.00059
 1636:  38 10 29  0 37 10 28  0              145389.12100  145389.11777    0.00323    0.01000   0.00045
 1637:  38 10 28  0 37 10 27  0              145399.87800  145399.86731    0.01069    0.01000   0.00045
 1638:  39  5 35  0 38  5 34  0              145400.51400  145400.51200    0.00200    0.01000   0.00055
 1639:  37  7 30  0 36  7 29  0              145662.88400  145662.88311    0.00089    0.01000   0.00061
 1640:  39  4 35  0 38  4 34  0              145825.10100  145825.09129    0.00971    0.01000   0.00057
 1641:  38  9 30  0 37  9 29  0              145913.28000  145913.29225   -0.01225    0.01000   0.00047
 1642:  21  6 16  0 20  5 15  0              146004.13400  146004.13835   -0.00435    0.01500   0.00075
 1643:  38  9 29  0 37  9 28  0              146032.79600  146032.80175   -0.00575    0.01000   0.00048
 1644:  38  7 32  0 37  7 31  0              146388.94600  146388.94038    0.00562    0.01000   0.00048
 1645:  38  8 31  0 37  8 30  0              146449.25800  146449.25906   -0.00106    0.01000   0.00048
 1646:  14  8  7  0 13  7  6  0              146657.27300  146657.25057    0.02243    0.01500   0.00083  146657.25509    0.01791 0.5000
 1647:  14  8  6  0 13  7  7  0              146657.27300  146657.25960    0.01340    0.01500   0.00083  146657.25509    0.01791 0.5000
 1648:  39  5 35  0 38  4 34  0              146903.44100  146903.43124    0.00976    0.01500   0.00063
 1649:  39 34  5  0 38 34  4  0              147178.97100  147178.95521    0.01579    0.01000   0.00130
 1650:  39 33  6  0 38 33  5  0              147193.67200  147193.66316    0.00884    0.01000   0.00116
 1651:  39 32  7  0 38 32  6  0              147209.40700  147209.39105    0.01595    0.01000   0.00104
 1652:  39 31  8  0 38 31  7  0              147226.29700  147226.28537    0.01163    0.01000   0.00094
 1653:  39 30  9  0 38 30  8  0              147244.51600  147244.51749   -0.00149    0.01000   0.00087
 1654:  39 29 10  0 38 29  9  0              147264.28800  147264.28908   -0.00108    0.01000   0.00081
 1655:  39 28 11  0 38 28 10  0              147285.84700  147285.83866    0.00834    0.01000   0.00076
 1656:  39 27 12  0 38 27 11  0              147309.45400  147309.45014    0.00386    0.01000   0.00072
 1657:  39 26 13  0 38 26 12  0              147335.47300  147335.46358    0.00942    0.01000   0.00069
 1658:  39 25 14  0 38 25 13  0              147364.28800  147364.28919   -0.00119    0.01000   0.00066
 1659:  38  8 30  0 37  8 29  0              147365.25300  147365.25191    0.00109    0.01000   0.00055
 1660:  39 23 16  0 38 23 15  0              147432.48000  147432.48366   -0.00366    0.01000   0.00060
 1661:  39 22 17  0 38 22 16  0              147473.21800  147473.21915   -0.00115    0.01000   0.00058
 1662:  39 21 18  0 38 21 17  0              147519.58200  147519.57578    0.00622    0.01000   0.00055
 1663:  39 20 19  0 38 20 18  0              147572.74000  147572.74548   -0.00548    0.01000   0.00053
 1664:  39 19 20  0 38 19 19  0              147634.24500  147634.25223   -0.00723    0.01000   0.00051
 1665:  38  5 33  0 37  5 32  0              147654.80400  147654.80783   -0.00383    0.01000   0.00054
 1666:  39 18 21  0 38 18 20  0              147706.07300  147706.07202    0.00098    0.01000   0.00049
 1667:  39 17 22  0 38 17 21  0              147790.80600  147790.80800   -0.00200    0.01000   0.00047
 1668:  11  9  3  0 10  8  2  0              147872.54100  147872.55891   -0.01791    0.01500   0.00088  147872.55891   -0.01791 0.5000
 1669:  11  9  2  0 10  8  3  0              147872.54100  147872.55891   -0.01791    0.01500   0.00088  147872.55891   -0.01791 0.5000
 1670:  39 16 23  0 38 16 22  0              147891.95700  147891.95338    0.00362    0.01000   0.00046
 1671:  39 15 24  0 38 15 23  0              148014.31300  148014.29886    0.01414    0.01000   0.00045
 1672:  39 14 25  0 38 14 24  0              148164.58400  148164.58941   -0.00541    0.01000   0.00044
 1673:  39 13 27  0 38 13 26  0              148352.62800  148352.63481   -0.00681    0.01000   0.00044  148352.63644   -0.00844 0.5000
 1674:  39 13 26  0 38 13 25  0              148352.62800  148352.63807   -0.01007    0.01000   0.00044  148352.63644   -0.00844 0.5000
 1675:  39  6 34  0 38  6 33  0              148417.17900  148417.18384   -0.00484    0.01000   0.00053
 1676:  44  1 44  0 43  1 43  0              148497.57300  148497.57323   -0.00023    0.01000   0.00101  148497.57328   -0.00028 0.2500
 1677:  44  0 44  0 43  0 43  0              148497.57300  148497.57333   -0.00033    0.01000   0.00101  148497.57328   -0.00028 0.2500
 1678:  44  0 44  0 43  1 43  0              148497.57300  148497.57309   -0.00009    0.01000   0.00101  148497.57328   -0.00028 0.2500
 1679:  44  1 44  0 43  0 43  0              148497.57300  148497.57347   -0.00047    0.01000   0.00101  148497.57328   -0.00028 0.2500
 1680:  43  2 42  0 42  2 41  0              148504.12400  148504.12106    0.00294    0.01000   0.00079  148504.12703   -0.00303 0.2500
 1681:  43  1 42  0 42  1 41  0              148504.12400  148504.13300   -0.00900    0.01000   0.00079  148504.12703   -0.00303 0.2500
 1682:  43  1 42  0 42  2 41  0              148504.12400  148504.10087    0.02313    0.01000   0.00079  148504.12703   -0.00303 0.2500
 1683:  43  2 42  0 42  1 41  0              148504.12400  148504.15319   -0.02919    0.01000   0.00079  148504.12703   -0.00303 0.2500
 1684:  42  2 40  0 41  3 39  0              148533.98500  148533.98508   -0.00008    0.01500   0.00067
 1685:  42  3 40  0 41  3 39  0              148535.17900  148535.18240   -0.00340    0.01500   0.00067
 1686:  42  2 40  0 41  2 39  0              148535.81400  148535.82952   -0.01552    0.01500   0.00067
 1687:  42  3 40  0 41  2 39  0              148537.05400  148537.02684    0.02716    0.01500   0.00067
 1688:  39 12 28  0 38 12 27  0              148593.32000  148593.29450    0.02550    0.01000   0.00044  148593.33008   -0.01008 0.5000
 1689:  39 12 27  0 38 12 26  0              148593.32000  148593.36566   -0.04566    0.01000   0.00044  148593.33008   -0.01008 0.5000
 1690:  41  4 38  0 40  4 37  0              148623.19800  148623.20385   -0.00585    0.01000   0.00061
 1691:  41  3 38  0 40  3 37  0              148642.18400  148642.17496    0.00904    0.01000   0.00061
 1692:  40  5 36  0 39  5 35  0              148751.72400  148751.72183    0.00217    0.01000   0.00058
 1693:  39 11 29  0 38 11 28  0              148910.02000  148909.99553    0.02447    0.01500   0.00045
 1694:  39 11 28  0 38 11 27  0              148911.25500  148911.24767    0.00733    0.01000   0.00045
 1695:  40  4 36  0 39  4 35  0              149062.52800  149062.52695    0.00105    0.01000   0.00059
 1696:  53 26 27  0 52 26 26  0              200554.34300  200554.31795    0.02505    0.01500   0.00102
 1697:  53 25 28  0 52 25 27  0              200624.32600  200624.32555    0.00045    0.01500   0.00100
 1698:  52 11 42  0 51 11 41  0              200653.57800  200653.56414    0.01386    0.01500   0.00088
 1699:  53 24 29  0 52 24 28  0              200702.88100  200702.87935    0.00165    0.01500   0.00097
 1700:  53 23 30  0 52 23 29  0              200791.56200  200791.56971   -0.00771    0.01500   0.00094
 1701:  52  9 44  0 51  9 43  0              200953.48200  200953.48476   -0.00276    0.01500   0.00086
 1702:  53 21 32  0 52 21 31  0              201007.81300  201007.80241    0.01059    0.01500   0.00088
 1703:  52 11 41  0 51 11 40  0              201021.28700  201021.27807    0.00893    0.01500   0.00097
 1704:  53 20 33  0 52 20 32  0              201141.04300  201141.03495    0.00805    0.01500   0.00085
 1705:  52  7 45  0 51  7 44  0              201475.39000  201475.38392    0.00608    0.01500   0.00104
 1706:  53 18 35  0 52 18 34  0              201478.82400  201478.83572   -0.01172    0.01500   0.00079
 1707:  53 17 36  0 52 17 35  0              201696.26900  201696.29324   -0.02424    0.01500   0.00078
 1708:  55 19 36  0 54 19 35  0              209009.70100  209009.72443   -0.02343    0.01500   0.00086
 1709:  56  7 50  0 55  7 49  0              209062.42000  209062.41639    0.00361    0.01500   0.00108
 1710:  54 10 45  0 53 10 44  0              209174.22100  209174.22805   -0.00705    0.01500   0.00095
 1711:  56  6 50  0 55  6 49  0              209196.94700  209196.93699    0.01001    0.01500   0.00110
 1712:  55 18 37  0 54 18 36  0              209214.79600  209214.79651   -0.00051    0.01500   0.00083
 1713:  55  8 48  0 54  8 47  0              209243.06900  209243.05235    0.01665    0.01500   0.00102
 1714:  54 11 43  0 53 11 42  0              209445.63400  209445.64710   -0.01310    0.01500   0.00117
 1715:  55 17 38  0 54 17 37  0              209459.45900  209459.45858    0.00042    0.01500   0.00082
 1716:  55 16 40  0 54 16 39  0              209755.66200  209755.66348   -0.00148    0.01500   0.00082  209755.66636   -0.00436 0.5000
 1717:  55 16 39  0 54 16 38  0              209755.66200  209755.66925   -0.00725    0.01500   0.00082  209755.66636   -0.00436 0.5000
 1718:  53  8 45  0 52  8 44  0              210055.91600  210055.95565   -0.03965    0.03000   0.00094
 1719:  55 15 41  0 54 15 40  0              210120.81100  210120.79831    0.01269    0.03000   0.00083  210120.84647   -0.03547 0.5000
 1720:  55 15 40  0 54 15 39  0              210120.81100  210120.89462   -0.08362    0.03000   0.00083  210120.84647   -0.03547 0.5000
 1721:  55  7 48  0 54  7 47  0              210510.52800  210510.53700   -0.00900    0.01500   0.00115
 1722:  55 13 43  0 54 13 42  0              211175.21600  211175.21714   -0.00114    0.01500   0.00091
 1723:  55 13 42  0 54 13 41  0              211190.84400  211190.86025   -0.01625    0.01500   0.00091
 1724:  56 38 18  0 55 38 17  0              211432.92900  211432.92173    0.00727    0.01500   0.00203
 1725:  56 37 19  0 55 37 18  0              211462.43100  211462.42707    0.00393    0.01500   0.00180
 1726:  56 35 21  0 55 35 20  0              211527.55100  211527.53622    0.01478    0.01500   0.00147
 1727:  56 33 23  0 55 33 22  0              211602.59700  211602.59218    0.00482    0.01500   0.00131
 1728:  56 32 24  0 55 32 23  0              211644.69500  211644.69664   -0.00164    0.01500   0.00127
 1729:  56 19 37  0 55 19 36  0              212871.56400  212871.58877   -0.02477    0.01500   0.00088
 1730:  55 10 46  0 54 10 45  0              213069.14500  213069.15915   -0.01415    0.01500   0.00098
 1731:  56 18 38  0 55 18 37  0              213088.65200  213088.64752    0.00448    0.01500   0.00086
 1732:  54  8 46  0 53  8 45  0              213298.44700  213298.46376   -0.01676    0.01500   0.00100
 1733:  56 17 39  0 55 17 38  0              213347.91500  213347.87815    0.03685    0.03000   0.00084
 1734:  56  7 49  0 55  7 48  0              213592.15800  213592.18440   -0.02640    0.03000   0.00117
 1735:  56 16 41  0 55 16 40  0              213662.17000  213662.16077    0.00923    0.01500   0.00084  213662.16580    0.00420 0.5000
 1736:  56 16 40  0 55 16 39  0              213662.17000  213662.17084   -0.00084    0.01500   0.00084  213662.16580    0.00420 0.5000
 1737:  56 15 42  0 55 15 41  0              214050.41800  214050.33776    0.08024    0.01500   0.00086  214050.41824   -0.00024 0.5000
 1738:  56 15 41  0 55 15 40  0              214050.41800  214050.49872   -0.08072    0.01500   0.00086  214050.41824   -0.00024 0.5000
 1739:  56 14 43  0 55 14 42  0              214540.90100  214540.91101   -0.01001    0.01500   0.00090
 1740:  56 14 42  0 55 14 41  0              214543.03700  214543.07287   -0.03587    0.01500   0.00090
 1741:  57 43 14  0 56 43 13  0              215090.11500  215090.07582    0.03918    0.03000   0.00413
 1742:  57 40 17  0 56 40 16  0              215164.24000  215164.20516    0.03484    0.03000   0.00272
 1743:  64  0 64  0 63  0 63  0              215185.75200  215185.76001   -0.00801    0.01500   0.00234  215185.76001   -0.00801 0.2500
 1744:  64  1 64  0 63  1 63  0              215185.75200  215185.76001   -0.00801    0.01500   0.00234  215185.76001   -0.00801 0.2500
 1745:  64  0 64  0 63  1 63  0              215185.75200  215185.76001   -0.00801    0.01500   0.00234  215185.76001   -0.00801 0.2500
 1746:  64  1 64  0 63  0 63  0              215185.75200  215185.76001   -0.00801    0.01500   0.00234  215185.76001   -0.00801 0.2500
 1747:  63  1 62  0 62  1 61  0              215187.59900  215187.60439   -0.00539    0.01500   0.00179  215187.60439   -0.00539 0.2500
 1748:  63  2 62  0 62  2 61  0              215187.59900  215187.60439   -0.00539    0.01500   0.00179  215187.60439   -0.00539 0.2500
 1749:  63  1 62  0 62  2 61  0              215187.59900  215187.60438   -0.00538    0.01500   0.00179  215187.60439   -0.00539 0.2500
 1750:  63  2 62  0 62  1 61  0              215187.59900  215187.60439   -0.00539    0.01500   0.00179  215187.60439   -0.00539 0.2500
 1751:  57 39 18  0 56 39 17  0              215191.64400  215191.65859   -0.01459    0.03000   0.00237
 1752:  56 13 43  0 55 13 42  0              215198.34000  215198.44226   -0.10226    0.01500   0.00118  215198.33084    0.00916 0.2000
 1753:  62  3 60  0 61  3 59  0              215198.34000  215198.30294    0.03706    0.01500   0.00118  215198.33084    0.00916 0.2000
 1754:  62  2 60  0 61  2 59  0              215198.34000  215198.30303    0.03697    0.01500   0.00118  215198.33084    0.00916 0.2000
 1755:  62  2 60  0 61  3 59  0              215198.34000  215198.30280    0.03720    0.01500   0.00118  215198.33084    0.00916 0.2000
 1756:  62  3 60  0 61  2 59  0              215198.34000  215198.30317    0.03683    0.01500   0.00118  215198.33084    0.00916 0.2000
 1757:  57 38 19  0 56 38 18  0              215220.75900  215220.75487    0.00413    0.01500   0.00208
 1758:  61  4 58  0 60  4 57  0              215228.64700  215228.64446    0.00254    0.01500   0.00122  215228.64676    0.00024 0.2500
 1759:  61  3 58  0 60  3 57  0              215228.64700  215228.64906   -0.00206    0.01500   0.00122  215228.64676    0.00024 0.2500
 1760:  61  3 58  0 60  4 57  0              215228.64700  215228.63623    0.01077    0.01500   0.00122  215228.64676    0.00024 0.2500
 1761:  61  4 58  0 60  3 57  0              215228.64700  215228.65729   -0.01029    0.01500   0.00122  215228.64676    0.00024 0.2500
 1762:  57 37 20  0 56 37 19  0              215251.69100  215251.69038    0.00062    0.01500   0.00185
 1763:  57 36 21  0 56 36 20  0              215284.69400  215284.68944    0.00456    0.01500   0.00167
 1764:  60  5 56  0 59  5 55  0              215297.07600  215296.96804    0.10796    0.03000   0.00116  215297.05077    0.02523 0.2500
 1765:  60  4 56  0 59  4 55  0              215297.07600  215297.13350   -0.05750    0.03000   0.00116  215297.05077    0.02523 0.2500
 1766:  60  4 56  0 59  5 55  0              215297.07600  215296.64997    0.42603    0.03000   0.00116  215297.05077    0.02523 0.2500
 1767:  60  5 56  0 59  4 55  0              215297.07600  215297.45157   -0.37557    0.03000   0.00116  215297.05077    0.02523 0.2500
 1768:  57 34 23  0 56 34 22  0              215357.94800  215357.94576    0.00224    0.01500   0.00145
 1769:  57 33 24  0 56 33 23  0              215398.84000  215398.84134   -0.00134    0.01500   0.00139
 1770:  59  5 54  0 58  5 53  0              215439.51400  215439.51463   -0.00063    0.01500   0.00115
 1771:  57 32 25  0 56 32 24  0              215443.08200  215443.09345   -0.01145    0.01500   0.00134
 1772:  54  9 45  0 53  9 44  0              215479.87700  215479.90136   -0.02436    0.01500   0.00138
 1773:  57 31 26  0 56 31 25  0              215491.15200  215491.16601   -0.01401    0.01500   0.00132
 1774:  56  9 48  0 55  9 47  0              215525.09000  215525.08419    0.00581    0.01500   0.00100
 1775:  57 29 28  0 56 29 27  0              215601.04100  215601.04747   -0.00647    0.01500   0.00127
 1776:  57 28 29  0 56 28 28  0              215664.25900  215664.26086   -0.00186    0.01500   0.00125
 1777:  58  7 52  0 57  7 51  0              215687.28700  215687.27046    0.01654    0.01500   0.00115
 1778:  57 27 30  0 56 27 29  0              215734.15400  215734.15453   -0.00053    0.01500   0.00122
 1779:  58  6 52  0 57  6 51  0              215755.98100  215755.99810   -0.01710    0.01500   0.00116
 1780:  57 26 31  0 56 26 30  0              215811.81100  215811.82515   -0.01415    0.01500   0.00119
 1781:  57 25 32  0 56 25 31  0              215898.58600  215898.60355   -0.01755    0.01500   0.00115
 1782:  56 12 45  0 55 12 44  0              215976.72200  215976.76062   -0.03862    0.03000   0.00103
 1783:  57 24 33  0 56 24 32  0              215996.12600  215996.11907    0.00693    0.01500   0.00111
 1784:  57 23 34  0 56 23 33  0              216106.38900  216106.38638    0.00262    0.01500   0.00107
 1785:  56 12 44  0 55 12 43  0              216184.89800  216184.89489    0.00311    0.01500   0.00110
 1786:  57 22 35  0 56 22 34  0              216231.93200  216231.92469    0.00731    0.01500   0.00102
 1787:  57 21 36  0 56 21 35  0              216375.91500  216375.92461   -0.00961    0.01500   0.00098
 1788:  55  8 47  0 54  8 46  0              216414.95400  216414.96386   -0.00986    0.01500   0.00108
 1789:  57 20 37  0 56 20 36  0              216542.48900  216542.48719    0.00181    0.01500   0.00094
 1790:  57  7 50  0 56  7 49  0              216711.95300  216711.96073   -0.00773    0.01500   0.00120
 1791:  57 19 38  0 56 19 37  0              216736.98500  216736.97623    0.00877    0.01500   0.00090
 1792:  56 11 46  0 55 11 45  0              216785.45900  216785.46277   -0.00377    0.01500   0.00107
 1793:  56 10 47  0 55 10 46  0              216925.87600  216925.85399    0.02201    0.01500   0.00102
 1794:  57 18 39  0 56 18 38  0              216966.55500  216966.55488    0.00012    0.01500   0.00088
 1795:  55 10 45  0 54 10 44  0              217128.33500  217128.33978   -0.00478    0.01500   0.00180
 1796:  57 17 40  0 56 17 39  0              217241.05000  217241.03831    0.01169    0.01500   0.00087
 1797:  57 16 42  0 56 16 41  0              217574.33100  217574.30948    0.02152    0.01500   0.00087  217574.31817    0.01283 0.5000
 1798:  57 16 41  0 56 16 40  0              217574.33100  217574.32685    0.00415    0.01500   0.00087  217574.31817    0.01283 0.5000
 1799:  41 18 23  0 41 17 24  0              217893.49900  217893.48044    0.01856    0.03000   0.00375
 1800:  35  8 28  0 34  7 27  0              217922.92500  217922.95654   -0.03154    0.03000   0.00105
 1801:  57 15 43  0 56 15 42  0              217986.93900  217986.79404    0.14496    0.01500   0.00090  217986.92704    0.01196 0.5000
 1802:  57 15 42  0 56 15 41  0              217986.93900  217987.06005   -0.12105    0.01500   0.00090  217986.92704    0.01196 0.5000
 1803:  40 18 22  0 40 17 23  0              217992.06700  217992.01543    0.05157    0.03000   0.00375
 1804:  23 11 13  0 22 10 12  0              218070.53300  218070.53357   -0.00057    0.03000   0.00100  218070.53379   -0.00079 0.5000
 1805:  23 11 12  0 22 10 13  0              218070.53300  218070.53402   -0.00102    0.03000   0.00100  218070.53379   -0.00079 0.5000
 1806:  56 11 45  0 55 11 44  0              218107.66000  218107.66206   -0.00206    0.01500   0.00149
 1807:  37 18 19  0 37 17 20  0              218246.57200  218246.57622   -0.00422    0.03000   0.00377
 1808:  36 18 18  0 36 17 19  0              218318.94600  218318.92506    0.02094    0.03000   0.00377
 1809:  35 18 17  0 35 17 18  0              218385.63000  218385.57980    0.05020    0.03000   0.00378
 1810:  34 18 16  0 34 17 17  0              218446.86000  218446.85828    0.00172    0.03000   0.00378
 1811:  57 14 44  0 56 14 43  0              218509.38400  218509.38206    0.00194    0.01500   0.00094
 1812:  57 14 43  0 56 14 42  0              218512.78700  218512.80029   -0.01329    0.01500   0.00094
 1813:  65  0 65  0 64  0 64  0              218518.82300  218518.83239   -0.00939    0.01500   0.00243  218518.83239   -0.00939 0.2500
 1814:  65  1 65  0 64  1 64  0              218518.82300  218518.83239   -0.00939    0.01500   0.00243  218518.83239   -0.00939 0.2500
 1815:  65  0 65  0 64  1 64  0              218518.82300  218518.83239   -0.00939    0.01500   0.00243  218518.83239   -0.00939 0.2500
 1816:  65  1 65  0 64  0 64  0              218518.82300  218518.83239   -0.00939    0.01500   0.00243  218518.83239   -0.00939 0.2500
 1817:  64  1 63  0 63  1 62  0              218520.55900  218520.55812    0.00088    0.01500   0.00185  218520.55812    0.00088 0.2500
 1818:  64  2 63  0 63  2 62  0              218520.55900  218520.55812    0.00088    0.01500   0.00185  218520.55812    0.00088 0.2500
 1819:  64  1 63  0 63  2 62  0              218520.55900  218520.55812    0.00088    0.01500   0.00185  218520.55812    0.00088 0.2500
 1820:  64  2 63  0 63  1 62  0              218520.55900  218520.55812    0.00088    0.01500   0.00185  218520.55812    0.00088 0.2500
 1821:  63  3 61  0 62  3 60  0              218530.79000  218530.77924    0.01076    0.01500   0.00147  218530.77927    0.01073 0.2500
 1822:  63  2 61  0 62  2 60  0              218530.79000  218530.77930    0.01070    0.01500   0.00147  218530.77927    0.01073 0.2500
 1823:  63  2 61  0 62  3 60  0              218530.79000  218530.77915    0.01085    0.01500   0.00147  218530.77927    0.01073 0.2500
 1824:  63  3 61  0 62  2 60  0              218530.79000  218530.77938    0.01062    0.01500   0.00147  218530.77927    0.01073 0.2500
 1825:  62  4 59  0 61  4 58  0              218559.79100  218559.77577    0.01523    0.01500   0.00126  218559.77725    0.01375 0.2500
 1826:  62  3 59  0 61  3 58  0              218559.79100  218559.77873    0.01227    0.01500   0.00126  218559.77725    0.01375 0.2500
 1827:  62  3 59  0 61  4 58  0              218559.79100  218559.77049    0.02051    0.01500   0.00126  218559.77725    0.01375 0.2500
 1828:  62  4 59  0 61  3 58  0              218559.79100  218559.78400    0.00700    0.01500   0.00126  218559.77725    0.01375 0.2500
 1829:  31 18 13  0 31 17 14  0              218601.48800  218601.45207    0.03593    0.03000   0.00380
 1830:  61  5 57  0 60  5 56  0              218624.89200  218624.84748    0.04452    0.01500   0.00119  218624.90213   -0.01013 0.2500
 1831:  61  4 57  0 60  4 56  0              218624.89200  218624.95677   -0.06477    0.01500   0.00119  218624.90213   -0.01013 0.2500
 1832:  61  4 57  0 60  5 56  0              218624.89200  218624.63870    0.25330    0.01500   0.00119  218624.90213   -0.01013 0.2500
 1833:  61  5 57  0 60  4 56  0              218624.89200  218625.16555   -0.27355    0.01500   0.00119  218624.90213   -0.01013 0.2500
 1834:  29 18 11  0 29 17 12  0              218682.98300  218682.98132    0.00168    0.03000   0.00382
 1835:  27 18  9  0 27 17 10  0              218749.74300  218749.74460   -0.00160    0.03000   0.00383
 1836:  60  6 55  0 59  6 54  0              218756.28900  218756.25635    0.03265    0.03000   0.00118
 1837:  60  5 55  0 59  5 54  0              218759.01900  218759.03443   -0.01543    0.01500   0.00118
 1838:  60  6 55  0 59  5 54  0              218764.78200  218764.80591   -0.02391    0.03000   0.00118
 1839:  26 18  8  0 26 17  9  0              218778.21900  218778.20033    0.01867    0.03000   0.00384
 1840:  57  8 50  0 56  7 49  0              218796.92200  218796.92971   -0.00771    0.03000   0.00170
 1841:  25 18  7  0 25 17  8  0              218803.67800  218803.67968   -0.00168    0.03000   0.00384
 1842:  24 18  6  0 24 17  7  0              218826.43200  218826.40198    0.03002    0.03000   0.00385
 1843:  58 45 13  0 57 45 12  0              218826.71100  218826.72929   -0.01829    0.03000   0.00543
 1844:  23 18  5  0 23 17  6  0              218846.58000  218846.57765    0.00235    0.03000   0.00386
 1845:  58 44 14  0 57 44 13  0              218849.10300  218849.12278   -0.01978    0.03000   0.00476
 1846:  58 43 15  0 57 43 14  0              218872.49700  218872.53069   -0.03369    0.03000   0.00416
 1847:  58 41 17  0 57 41 16  0              218922.85800  218922.85132    0.00668    0.03000   0.00317
 1848:  58 40 18  0 57 40 17  0              218950.01100  218950.03163   -0.02063    0.03000   0.00276
 1849:  58 39 19  0 57 39 18  0              218978.77400  218978.76621    0.00779    0.03000   0.00242
 1850:  59  7 53  0 58  7 52  0              218998.39200  218998.39780   -0.00580    0.01500   0.00118
 1851:  58 38 20  0 57 38 19  0              219009.25200  219009.23695    0.01505    0.03000   0.00214
 1852:  58 37 21  0 57 37 20  0              219041.67300  219041.65087    0.02213    0.03000   0.00192
 1853:  59  6 53  0 58  6 52  0              219047.09100  219047.10741   -0.01641    0.01500   0.00119
 1854:  57  9 49  0 56  9 48  0              219054.65800  219054.65704    0.00096    0.01500   0.00105
 1855:  58 36 22  0 57 36 21  0              219076.22000  219076.24446   -0.02446    0.03000   0.00175
 1856:  58 35 23  0 57 35 22  0              219113.28800  219113.28891   -0.00091    0.01500   0.00162
 1857:  58 34 24  0 57 34 23  0              219153.10700  219153.09641    0.01059    0.01500   0.00153
 1858:  59  7 53  0 58  6 52  0              219159.94400  219159.94985   -0.00585    0.03000   0.00121
 1859:  57 13 45  0 56 13 44  0              219184.31800  219184.30566    0.01234    0.01500   0.00101
 1860:  58 33 25  0 57 33 24  0              219196.01600  219196.02796   -0.01196    0.01500   0.00147
 1861:  57 13 44  0 56 13 43  0              219220.26800  219220.27148   -0.00348    0.01500   0.00103
 1862:  58 32 26  0 57 32 25  0              219242.51000  219242.50290    0.00710    0.01500   0.00142
 1863:  58 31 27  0 57 31 26  0              219293.01100  219293.01069    0.00031    0.01500   0.00139
 1864:  58  8 51  0 57  8 50  0              219306.64100  219306.64315   -0.00215    0.01500   0.00115
 1865:  20 12  9  0 19 11  8  0              219344.29800  219344.30676   -0.00876    0.03000   0.00115  219344.30676   -0.00876 0.5000
 1866:  20 12  8  0 19 11  9  0              219344.29800  219344.30676   -0.00876    0.03000   0.00115  219344.30676   -0.00876 0.5000
 1867:  58 30 28  0 57 30 27  0              219348.12500  219348.12575   -0.00075    0.01500   0.00137
 1868:  58 29 29  0 57 29 28  0              219408.53400  219408.52599    0.00801    0.01500   0.00134
 1869:  56  8 48  0 55  8 47  0              219436.62800  219436.64195   -0.01395    0.01500   0.00117
 1870:  58 28 30  0 57 28 29  0              219475.01800  219475.01642    0.00158    0.01500   0.00131
 1871:  58 27 31  0 57 27 30  0              219548.55600  219548.55946   -0.00346    0.01500   0.00128
 1872:  55  9 46  0 54  9 45  0              219551.69200  219551.65393    0.03807    0.03000   0.00133
 1873:  58 26 32  0 57 26 31  0              219630.32600  219630.31422    0.01178    0.01500   0.00124
 1874:  36  8 29  0 35  7 28  0              219661.81800  219661.79432    0.02368    0.03000   0.00119
 1875:  58 25 33  0 57 25 32  0              219721.68700  219721.68800   -0.00100    0.01500   0.00120
 1876:  77 19 58  0 77 18 59  0              219812.59100  219812.57467    0.01633    0.03000   0.00666
 1877:  77 19 59  0 77 18 60  0              219816.30800  219816.28888    0.01912    0.03000   0.00666
 1878:  58 24 34  0 57 24 33  0              219824.39600  219824.40500   -0.00900    0.01500   0.00115
 1879:  58  7 51  0 57  7 50  0              219866.42300  219866.43557   -0.01257    0.01500   0.00123
 1880:  58 23 35  0 57 23 34  0              219940.59600  219940.59896   -0.00296    0.01500   0.00110
 1881:  57 12 46  0 56 12 45  0              220023.61200  220023.60867    0.00333    0.01500   0.00109
 1882:  42  8 35  0 41  7 34  0              220029.61400  220029.58011    0.03389    0.03000   0.00269
 1883:  58 22 36  0 57 22 35  0              220072.94500  220072.94081    0.00419    0.01500   0.00105
 1884:  58 21 37  0 57 21 36  0              220224.80700  220224.81775   -0.01075    0.01500   0.00101
 1885:  27 10 18  0 26  9 17  0              220313.10100  220313.10332   -0.00232    0.03000   0.00091
 1886:  27 10 17  0 26  9 18  0              220313.53400  220313.54757   -0.01357    0.03000   0.00091
 1887:  57 12 45  0 56 12 44  0              220320.82200  220320.82622   -0.00422    0.01500   0.00121
 1888:  58 20 38  0 57 20 37  0              220400.58200  220400.59088   -0.00888    0.01500   0.00096
 1889:  58 19 39  0 57 19 38  0              220605.97300  220605.97650   -0.00350    0.01500   0.00093
 1890:  57 10 48  0 56 10 47  0              220740.21600  220740.22862   -0.01262    0.01500   0.00105
 1891:  57 11 47  0 56 11 46  0              220797.89300  220797.90147   -0.00847    0.01500   0.00112
 1892:  58 18 40  0 57 18 39  0              220848.63100  220848.63049    0.00051    0.01500   0.00091
 1893:  37  8 30  0 36  7 29  0              220944.70200  220944.66428    0.03772    0.03000   0.00137
 1894:  62  9 53  0 61 10 52  0              221058.18500  221058.19977   -0.01477    0.03000   0.00702
 1895:  58 17 42  0 57 17 41  0              221139.07800  221139.08218   -0.00418    0.01500   0.00090  221139.08304   -0.00504 0.5000
 1896:  58 17 41  0 57 17 40  0              221139.07800  221139.08390   -0.00590    0.01500   0.00090  221139.08304   -0.00504 0.5000
 1897:  58  8 51  0 57  7 50  0              221391.59000  221391.61213   -0.02213    0.03000   0.00160
 1898:  58 16 43  0 57 16 42  0              221492.32100  221492.30530    0.01570    0.01500   0.00091  221492.32011    0.00089 0.5000
 1899:  58 16 42  0 57 16 41  0              221492.32100  221492.33491   -0.01391    0.01500   0.00091  221492.32011    0.00089 0.5000
 1900:  59  7 52  0 58  8 51  0              221525.82500  221525.78845    0.03655    0.03000   0.00111
 1901:  14 14  0  0 13 13  1  0              221743.41100  221743.41431   -0.00331    0.03000   0.00169  221743.41431   -0.00331 0.5000
 1902:  14 14  1  0 13 13  0  0              221743.41100  221743.41431   -0.00331    0.03000   0.00169  221743.41431   -0.00331 0.5000
 1903:  56 10 46  0 55 10 45  0              221757.60200  221757.60055    0.00145    0.01500   0.00193
 1904:  24 11 14  0 23 10 13  0              221811.15600  221811.12775    0.02825    0.03000   0.00100  221811.12832    0.02768 0.5000
 1905:  24 11 13  0 23 10 14  0              221811.15600  221811.12890    0.02710    0.03000   0.00100  221811.12832    0.02768 0.5000
 1906:  66  0 66  0 65  0 65  0              221851.75100  221851.76082   -0.00982    0.01500   0.00252  221851.76082   -0.00982 0.2500
 1907:  66  1 66  0 65  1 65  0              221851.75100  221851.76082   -0.00982    0.01500   0.00252  221851.76082   -0.00982 0.2500
 1908:  66  0 66  0 65  1 65  0              221851.75100  221851.76082   -0.00982    0.01500   0.00252  221851.76082   -0.00982 0.2500
 1909:  66  1 66  0 65  0 65  0              221851.75100  221851.76082   -0.00982    0.01500   0.00252  221851.76082   -0.00982 0.2500
 1910:  65  1 64  0 64  1 63  0              221853.37000  221853.37372   -0.00372    0.01500   0.00193  221853.37372   -0.00372 0.2500
 1911:  65  2 64  0 64  2 63  0              221853.37000  221853.37372   -0.00372    0.01500   0.00193  221853.37372   -0.00372 0.2500
 1912:  65  1 64  0 64  2 63  0              221853.37000  221853.37372   -0.00372    0.01500   0.00193  221853.37372   -0.00372 0.2500
 1913:  65  2 64  0 64  1 63  0              221853.37000  221853.37372   -0.00372    0.01500   0.00193  221853.37372   -0.00372 0.2500
 1914:  64  2 62  0 63  2 61  0              221863.18200  221863.14294    0.03906    0.03000   0.00152  221863.14292    0.03908 0.2500
 1915:  64  3 62  0 63  3 61  0              221863.18200  221863.14290    0.03910    0.03000   0.00152  221863.14292    0.03908 0.2500
 1916:  64  2 62  0 63  3 61  0              221863.18200  221863.14285    0.03915    0.03000   0.00152  221863.14292    0.03908 0.2500
 1917:  64  3 62  0 63  2 61  0              221863.18200  221863.14299    0.03901    0.03000   0.00152  221863.14292    0.03908 0.2500
 1918:  63  4 60  0 62  4 59  0              221890.88200  221890.87435    0.00765    0.01500   0.00130  221890.87530    0.00670 0.2500
 1919:  63  3 60  0 62  3 59  0              221890.88200  221890.87625    0.00575    0.01500   0.00130  221890.87530    0.00670 0.2500
 1920:  63  3 60  0 62  4 59  0              221890.88200  221890.87098    0.01102    0.01500   0.00130  221890.87530    0.00670 0.2500
 1921:  63  4 60  0 62  3 59  0              221890.88200  221890.87963    0.00237    0.01500   0.00130  221890.87530    0.00670 0.2500
 1922:  58 15 44  0 57 15 43  0              221930.45100  221930.44151    0.00949    0.01500   0.00094
 1923:  58 15 43  0 57 15 42  0              221930.84200  221930.87635   -0.03435    0.01500   0.00094
 1924:  62  5 58  0 61  5 57  0              221952.92200  221952.90811    0.01389    0.01500   0.00122  221952.94412   -0.02212 0.2500
 1925:  62  4 58  0 61  4 57  0              221952.92200  221952.98013   -0.05813    0.01500   0.00122  221952.94412   -0.02212 0.2500
 1926:  62  4 58  0 61  5 57  0              221952.92200  221952.77135    0.15065    0.01500   0.00122  221952.94412   -0.02212 0.2500
 1927:  62  5 58  0 61  4 57  0              221952.92200  221953.11690   -0.19490    0.01500   0.00122  221952.94412   -0.02212 0.2500
 1928:  61  5 56  0 60  6 55  0              222073.76400  222073.79794   -0.03394    0.03000   0.00121
 1929:  61  6 56  0 60  6 55  0              222077.66900  222077.68300   -0.01400    0.01500   0.00121
 1930:  61  6 56  0 60  5 55  0              222083.41000  222083.45447   -0.04447    0.03000   0.00121
 1931:  60  6 54  0 59  7 53  0              222230.96000  222230.98629   -0.02629    0.03000   0.00121
 1932:  60  7 54  0 59  7 53  0              222309.50600  222309.48245    0.02355    0.01500   0.00122
 1933:  60  6 54  0 59  6 53  0              222343.81500  222343.82873   -0.01373    0.01500   0.00122
 1934:  57  8 49  0 56  8 48  0              222398.92000  222398.91911    0.00089    0.01500   0.00126
 1935:  60  7 54  0 59  6 53  0              222422.35700  222422.32489    0.03211    0.03000   0.00124
 1936:  58 14 45  0 57 14 44  0              222486.87000  222486.87196   -0.00196    0.01500   0.00099
 1937:  58 14 44  0 57 14 43  0              222492.21800  222492.21939   -0.00139    0.01500   0.00100
 1938:  58  9 50  0 57  9 49  0              222543.79400  222543.78499    0.00901    0.01500   0.00110
 1939:  57 11 46  0 56 11 45  0              222546.37100  222546.35190    0.01910    0.01500   0.00169
 1940:  59  8 52  0 58  8 51  0              222633.90400  222633.90081    0.00319    0.01500   0.00119
 1941:  59 42 17  0 58 42 16  0              222681.09600  222681.07114    0.02486    0.03000   0.00368
 1942:  59 41 18  0 58 41 17  0              222707.99000  222708.01498   -0.02498    0.03000   0.00322
 1943:  59 38 21  0 58 38 20  0              222798.40600  222798.37938    0.02662    0.03000   0.00222
 1944:  59 37 22  0 58 37 21  0              222832.32500  222832.32082    0.00418    0.03000   0.00200
 1945:  59 36 23  0 58 36 22  0              222868.56100  222868.56234   -0.00134    0.03000   0.00183
 1946:  59 35 24  0 58 35 23  0              222907.36500  222907.38963   -0.02463    0.03000   0.00171
 1947:  59 34 25  0 58 34 24  0              222949.09400  222949.13167   -0.03767    0.03000   0.00162
 1948:  59 33 26  0 58 33 25  0              222994.13500  222994.16889   -0.03389    0.03000   0.00156
 1949:  59 32 27  0 58 32 26  0              223042.93800  223042.94329   -0.00529    0.01500   0.00151
 1950:  59  7 52  0 58  7 51  0              223050.96000  223050.96501   -0.00501    0.01500   0.00126
 1951:  59 31 28  0 58 31 27  0              223095.96100  223095.97092   -0.00992    0.01500   0.00148
 1952:  21 12 10  0 20 11  9  0              223106.99000  223106.98569    0.00431    0.03000   0.00114  223106.98569    0.00431 0.5000
 1953:  21 12  9  0 20 11 10  0              223106.99000  223106.98570    0.00430    0.03000   0.00114  223106.98569    0.00431 0.5000
 1954:  59 30 29  0 58 30 28  0              223153.85900  223153.85749    0.00151    0.01500   0.00144
 1955:  58 13 46  0 57 13 45  0              223204.40200  223204.41004   -0.00804    0.01500   0.00108
 1956:  59 29 30  0 58 29 29  0              223217.33700  223217.31810    0.01890    0.01500   0.00141
 1957:  58 13 45  0 57 13 44  0              223258.06200  223258.06158    0.00042    0.01500   0.00110
 1958:  59 28 31  0 58 28 30  0              223287.19600  223287.20219   -0.00619    0.01500   0.00138
 1959:  59 27 32  0 58 27 31  0              223364.51000  223364.52572   -0.01572    0.01500   0.00134
 1960:  59 26 33  0 58 26 32  0              223450.51300  223450.51287    0.00013    0.01500   0.00129
 1961:  56  9 47  0 55  9 46  0              223453.92300  223453.91496    0.00804    0.01500   0.00127
 1962:  59 24 35  0 58 24 34  0              223654.76300  223654.76303   -0.00003    0.01500   0.00119
 1963:  59 23 36  0 58 23 35  0              223777.07700  223777.10797   -0.03097    0.03000   0.00114
 1964:  68 19 49  0 68 18 50  0              224594.05000  224593.99206    0.05794    0.03000   0.00502  224594.01749    0.03251 0.5000
 1965:  68 19 50  0 68 18 51  0              224594.05000  224594.04291    0.00709    0.03000   0.00502  224594.01749    0.03251 0.5000
 1966:  59 18 41  0 58 18 40  0              224735.01200  224734.99062    0.02138    0.01500   0.00094
 1967:  58 11 48  0 57 11 47  0              224792.18300  224792.17993    0.00307    0.01500   0.00117
 1968:  59 17 43  0 58 17 42  0              225042.17900  225042.16374    0.01526    0.01500   0.00093  225042.16525    0.01375 0.5000
 1969:  59 17 42  0 58 17 41  0              225042.17900  225042.16676    0.01224    0.01500   0.00093  225042.16525    0.01375 0.5000
 1970:  67  0 67  0 66  0 66  0              225184.54300  225184.54308   -0.00008    0.01500   0.00263  225184.54308   -0.00008 0.2500
 1971:  67  1 67  0 66  1 66  0              225184.54300  225184.54308   -0.00008    0.01500   0.00263  225184.54308   -0.00008 0.2500
 1972:  67  0 67  0 66  1 66  0              225184.54300  225184.54308   -0.00008    0.01500   0.00263  225184.54308   -0.00008 0.2500
 1973:  67  1 67  0 66  0 66  0              225184.54300  225184.54308   -0.00008    0.01500   0.00263  225184.54308   -0.00008 0.2500
 1974:  66  1 65  0 65  1 64  0              225186.04900  225186.04856    0.00044    0.01500   0.00201  225186.04856    0.00044 0.2500
 1975:  66  2 65  0 65  2 64  0              225186.04900  225186.04856    0.00044    0.01500   0.00201  225186.04856    0.00044 0.2500
 1976:  66  1 65  0 65  2 64  0              225186.04900  225186.04856    0.00044    0.01500   0.00201  225186.04856    0.00044 0.2500
 1977:  66  2 65  0 65  1 64  0              225186.04900  225186.04856    0.00044    0.01500   0.00201  225186.04856    0.00044 0.2500
 1978:  65  2 63  0 64  2 62  0              225195.39200  225195.38949    0.00251    0.01500   0.00158  225195.38948    0.00252 0.2500
 1979:  65  3 63  0 64  3 62  0              225195.39200  225195.38947    0.00253    0.01500   0.00158  225195.38948    0.00252 0.2500
 1980:  65  2 63  0 64  3 62  0              225195.39200  225195.38943    0.00257    0.01500   0.00158  225195.38948    0.00252 0.2500
 1981:  65  3 63  0 64  2 62  0              225195.39200  225195.38953    0.00247    0.01500   0.00158  225195.38948    0.00252 0.2500
 1982:  64  4 61  0 63  4 60  0              225221.94000  225221.92946    0.01054    0.01500   0.00135  225221.93007    0.00993 0.2500
 1983:  64  3 61  0 63  3 60  0              225221.94000  225221.93068    0.00932    0.01500   0.00135  225221.93007    0.00993 0.2500
 1984:  64  3 61  0 63  4 60  0              225221.94000  225221.92730    0.01270    0.01500   0.00135  225221.93007    0.00993 0.2500
 1985:  64  4 61  0 63  3 60  0              225221.94000  225221.93283    0.00717    0.01500   0.00135  225221.93007    0.00993 0.2500
 1986:  63  5 59  0 62  5 58  0              225281.14500  225281.12185    0.02315    0.01500   0.00126  225281.14553   -0.00053 0.2500
 1987:  63  4 59  0 62  4 58  0              225281.14500  225281.16920   -0.02420    0.01500   0.00126  225281.14553   -0.00053 0.2500
 1988:  63  4 59  0 62  5 58  0              225281.14500  225281.03243    0.11257    0.01500   0.00126  225281.14553   -0.00053 0.2500
 1989:  63  5 59  0 62  4 58  0              225281.14500  225281.25862   -0.11362    0.01500   0.00126  225281.14553   -0.00053 0.2500
 1990:  58  8 50  0 57  8 49  0              225336.35800  225336.36993   -0.01193    0.01500   0.00133
 1991:  62  6 57  0 61  6 56  0              225399.68700  225399.68043    0.00657    0.01500   0.00125
 1992:  62  5 57  0 61  5 56  0              225400.94400  225400.95734   -0.01334    0.01500   0.00125
 1993:  62  6 57  0 61  5 56  0              225403.54900  225403.56549   -0.01649    0.03000   0.00125
 1994:  59 16 44  0 58 16 43  0              225416.37500  225416.35512    0.01988    0.01500   0.00095  225416.38009   -0.00509 0.5000
 1995:  59 16 43  0 58 16 42  0              225416.37500  225416.40506   -0.03006    0.01500   0.00095  225416.38009   -0.00509 0.5000
 1996:  15 14  2  0 14 13  1  0              225517.24200  225517.22540    0.01660    0.03000   0.00168  225517.22540    0.01660 0.5000
 1997:  15 14  1  0 14 13  2  0              225517.24200  225517.22540    0.01660    0.03000   0.00168  225517.22540    0.01660 0.5000
 1998:  25 11 15  0 24 10 14  0              225545.00200  225545.00675   -0.00475    0.03000   0.00099  225545.00815   -0.00615 0.5000
 1999:  25 11 14  0 24 10 15  0              225545.00200  225545.00954   -0.00754    0.03000   0.00099  225545.00815   -0.00615 0.5000
 2000:  61  7 55  0 60  7 54  0              225620.91700  225620.91056    0.00644    0.01500   0.00126
 2001:  61  6 55  0 60  6 54  0              225644.99000  225645.01392   -0.02392    0.01500   0.00126
 2002:  65 19 46  0 65 18 47  0              225764.51600  225764.49345    0.02255    0.03000   0.00479  225764.49863    0.01737 0.5000
 2003:  65 19 47  0 65 18 48  0              225764.51600  225764.50381    0.01219    0.03000   0.00479  225764.49863    0.01737 0.5000
 2004:  59 15 45  0 58 15 44  0              225881.57600  225881.57026    0.00574    0.01500   0.00099
 2005:  59 15 44  0 58 15 43  0              225882.29300  225882.27359    0.01941    0.01500   0.00099
 2006:  60  8 53  0 59  8 52  0              225952.66700  225952.67331   -0.00631    0.01500   0.00124
 2007:  59  9 51  0 58  9 50  0              225996.23600  225996.23550    0.00050    0.01500   0.00115
 2008:  60  7 53  0 59  7 52  0              226260.67500  226260.67945   -0.00445    0.01500   0.00129
 2009:  60 48 12  0 59 48 11  0              226321.67200  226321.70818   -0.03618    0.03000   0.00799
 2010:  60 47 13  0 59 47 12  0              226343.25400  226343.27686   -0.02286    0.03000   0.00709
 2011:  60 45 15  0 59 45 14  0              226389.02100  226389.00849    0.01251    0.03000   0.00553
 2012:  60 44 16  0 59 44 15  0              226413.34600  226413.35903   -0.01303    0.03000   0.00487
 2013:  60 43 17  0 59 43 16  0              226438.85000  226438.84295    0.00705    0.03000   0.00427
 2014:  63 19 44  0 63 18 45  0              226450.69900  226450.67126    0.02774    0.03000   0.00469  226450.67297    0.02603 0.5000
 2015:  63 19 45  0 63 18 46  0              226450.69900  226450.67468    0.02432    0.03000   0.00469  226450.67297    0.02603 0.5000
 2016:  60 42 18  0 59 42 17  0              226465.57300  226465.58420   -0.01120    0.03000   0.00375
 2017:  59 14 46  0 58 14 45  0              226473.72500  226473.72505   -0.00005    0.01500   0.00106
 2018:  59 14 45  0 58 14 44  0              226482.00300  226482.00340   -0.00040    0.01500   0.00106
 2019:  60 41 19  0 59 41 18  0              226493.75100  226493.72215    0.02885    0.03000   0.00329
 2020:  60 40 20  0 59 40 19  0              226523.42100  226523.41392    0.00708    0.03000   0.00290
 2021:  60 39 21  0 59 39 20  0              226554.82200  226554.83719   -0.01519    0.03000   0.00258
 2022:  60 38 22  0 59 38 21  0              226588.19200  226588.19356   -0.00156    0.01500   0.00231
 2023:  60 37 23  0 59 37 22  0              226623.71000  226623.71254   -0.00254    0.01500   0.00210
 2024:  60 36 24  0 59 36 23  0              226661.65600  226661.65636   -0.00036    0.01500   0.00194
 2025:  60 35 25  0 59 35 24  0              226702.33900  226702.32576    0.01324    0.01500   0.00182
 2026:  60 34 26  0 59 34 25  0              226746.07200  226746.06712    0.00488    0.01500   0.00173
 2027:  62 19 43  0 62 18 44  0              226767.91700  226767.92436   -0.00736    0.03000   0.00465  226767.92532   -0.00832 0.5000
 2028:  62 19 44  0 62 18 45  0              226767.91700  226767.92629   -0.00929    0.03000   0.00465  226767.92532   -0.00832 0.5000
 2029:  60 33 27  0 59 33 26  0              226793.27900  226793.28104   -0.00204    0.01500   0.00166
 2030:  60 32 28  0 59 32 27  0              226844.42500  226844.43305   -0.00805    0.01500   0.00161
 2031:  22 12 11  0 21 11 10  0              226866.54800  226866.53462    0.01338    0.03000   0.00113  226866.53462    0.01338 0.5000
 2032:  22 12 10  0 21 11 11  0              226866.54800  226866.53462    0.01338    0.03000   0.00113  226866.53462    0.01338 0.5000
 2033:  60 31 29  0 59 31 28  0              226900.06500  226900.06677   -0.00177    0.01500   0.00157
 2034:  60 30 30  0 59 30 29  0              226960.81800  226960.82049   -0.00249    0.01500   0.00153
 2035:  60 29 31  0 59 29 30  0              227027.44900  227027.44793    0.00107    0.01500   0.00149
 2036:  60  8 53  0 59  7 52  0              227060.79000  227060.78568    0.00432    0.03000   0.00148
 2037:  58 11 47  0 57 11 46  0              227061.10900  227061.10225    0.00675    0.01500   0.00193
 2038:  61 19 42  0 61 18 43  0              227068.94500  227068.93382    0.01118    0.03000   0.00462  227068.93436    0.01064 0.5000
 2039:  61 19 43  0 61 18 44  0              227068.94500  227068.93490    0.01010    0.03000   0.00462  227068.93436    0.01064 0.5000
 2040:  60 28 32  0 59 28 31  0              227100.84800  227100.84480    0.00320    0.01500   0.00145
 2041:  57  9 48  0 56  9 47  0              227179.20900  227179.21244   -0.00344    0.01500   0.00121
 2042:  60 27 33  0 59 27 32  0              227182.07900  227182.08281   -0.00381    0.01500   0.00140
 2043:  59 13 47  0 58 13 46  0              227234.79700  227234.78640    0.01060    0.01500   0.00115
 2044:  60 26 34  0 59 26 33  0              227272.45700  227272.45400    0.00300    0.01500   0.00135
 2045:  59 13 46  0 58 13 45  0              227313.95600  227313.96115   -0.00515    0.01500   0.00119
 2046:  60 25 35  0 59 25 34  0              227373.53300  227373.52902    0.00398    0.01500   0.00130
 2047:  60 24 36  0 59 24 35  0              227487.23800  227487.23500    0.00300    0.01500   0.00124
 2048:  60 23 37  0 59 23 36  0              227615.96500  227615.96126    0.00374    0.01500   0.00118
 2049:  59 19 40  0 59 18 41  0              227624.95400  227624.95926   -0.00526    0.03000   0.00458
 2050:  29 10 20  0 28  9 19  0              227646.90100  227646.89383    0.00717    0.03000   0.00091
 2051:  29 10 19  0 28  9 20  0              227648.62500  227648.59957    0.02543    0.03000   0.00091
 2052:  60 22 38  0 59 22 37  0              227762.70100  227762.70543   -0.00443    0.01500   0.00113
 2053:  58 19 39  0 58 18 40  0              227881.28200  227881.26771    0.01429    0.03000   0.00456
 2054:  60 21 39  0 59 21 38  0              227931.27900  227931.28001   -0.00101    0.01500   0.00107
 2055:  19 13  7  0 18 12  6  0              228095.35000  228095.35923   -0.00923    0.03000   0.00136  228095.35923   -0.00923 0.5000
 2056:  19 13  6  0 18 12  7  0              228095.35000  228095.35923   -0.00923    0.03000   0.00136  228095.35923   -0.00923 0.5000
 2057:  57 19 38  0 57 18 39  0              228123.92700  228123.92170    0.00530    0.03000   0.00455
 2058:  60 20 40  0 59 20 39  0              228126.59700  228126.61170   -0.01470    0.01500   0.00103
 2059:  59 12 48  0 58 12 47  0              228130.32000  228130.31021    0.00979    0.01500   0.00124
 2060:  59 10 50  0 58 10 49  0              228230.34900  228230.34538    0.00362    0.01500   0.00113
 2061:  59  8 51  0 58  8 50  0              228278.06500  228278.04101    0.02399    0.01500   0.00139
 2062:  56 19 37  0 56 18 38  0              228353.50800  228353.50035    0.00765    0.03000   0.00454
 2063:  60 19 41  0 59 19 40  0              228355.15100  228355.18890   -0.03790    0.03000   0.00099
 2064:  68  1 68  0 67  1 67  0              228517.16900  228517.17692   -0.00792    0.01500   0.00275  228517.17692   -0.00792 0.2500
 2065:  68  0 68  0 67  0 67  0              228517.16900  228517.17692   -0.00792    0.01500   0.00275  228517.17692   -0.00792 0.2500
 2066:  68  1 68  0 67  0 67  0              228517.16900  228517.17692   -0.00792    0.01500   0.00275  228517.17692   -0.00792 0.2500
 2067:  68  0 68  0 67  1 67  0              228517.16900  228517.17692   -0.00792    0.01500   0.00275  228517.17692   -0.00792 0.2500
 2068:  67  1 66  0 66  1 65  0              228518.58100  228518.58006    0.00094    0.01500   0.00211  228518.58006    0.00094 0.2500
 2069:  67  2 66  0 66  2 65  0              228518.58100  228518.58006    0.00094    0.01500   0.00211  228518.58006    0.00094 0.2500
 2070:  67  1 66  0 66  2 65  0              228518.58100  228518.58006    0.00094    0.01500   0.00211  228518.58006    0.00094 0.2500
 2071:  67  2 66  0 66  1 65  0              228518.58100  228518.58006    0.00094    0.01500   0.00211  228518.58006    0.00094 0.2500
 2072:  66  2 64  0 65  2 63  0              228527.52500  228527.51470    0.01030    0.01500   0.00166  228527.51469    0.01031 0.2500
 2073:  66  3 64  0 65  3 63  0              228527.52500  228527.51468    0.01032    0.01500   0.00166  228527.51469    0.01031 0.2500
 2074:  66  2 64  0 65  3 63  0              228527.52500  228527.51466    0.01034    0.01500   0.00166  228527.51469    0.01031 0.2500
 2075:  66  3 64  0 65  2 63  0              228527.52500  228527.51472    0.01028    0.01500   0.00166  228527.51469    0.01031 0.2500
 2076:  65  4 62  0 64  4 61  0              228552.92000  228552.93112   -0.01112    0.01500   0.00140  228552.93151   -0.01151 0.2500
 2077:  65  3 62  0 64  3 61  0              228552.92000  228552.93190   -0.01190    0.01500   0.00140  228552.93151   -0.01151 0.2500
 2078:  65  3 62  0 64  4 61  0              228552.92000  228552.92974   -0.00974    0.01500   0.00140  228552.93151   -0.01151 0.2500
 2079:  65  4 62  0 64  3 61  0              228552.92000  228552.93328   -0.01328    0.01500   0.00140  228552.93151   -0.01151 0.2500
 2080:  64  5 60  0 63  5 59  0              228609.47500  228609.46273    0.01227    0.01500   0.00130  228609.47826   -0.00326 0.2500
 2081:  64  4 60  0 63  4 59  0              228609.47500  228609.49379   -0.01879    0.01500   0.00130  228609.47826   -0.00326 0.2500
 2082:  64  4 60  0 63  5 59  0              228609.47500  228609.40437    0.07063    0.01500   0.00130  228609.47826   -0.00326 0.2500
 2083:  64  5 60  0 63  4 59  0              228609.47500  228609.55215   -0.07715    0.01500   0.00130  228609.47826   -0.00326 0.2500
 2084:  60 18 42  0 59 18 41  0              228625.77000  228625.75632    0.01368    0.01500   0.00098
 2085:  61  7 54  0 60  8 53  0              228690.91000  228690.92812   -0.01812    0.03000   0.00122
 2086:  59 12 47  0 58 12 46  0              228714.15100  228714.13146    0.01954    0.01500   0.00149
 2087:  63  5 58  0 62  6 57  0              228720.48500  228720.45943    0.02557    0.03000   0.00129
 2088:  63  6 58  0 62  6 57  0              228722.20200  228722.20583   -0.00383    0.01500   0.00129
 2089:  63  5 58  0 62  5 57  0              228723.06800  228723.06758    0.00042    0.01500   0.00129
 2090:  63  6 58  0 62  5 57  0              228724.85800  228724.81398    0.04402    0.03000   0.00129
 2091:  59 11 49  0 58 11 48  0              228762.77600  228762.75408    0.02192    0.01500   0.00122
 2092:  62  7 56  0 61  7 55  0              228932.94500  228932.93422    0.01078    0.01500   0.00130
 2093:  62  6 56  0 61  6 55  0              228949.76600  228949.77419   -0.00819    0.01500   0.00131
 2094:  60 17 44  0 59 17 43  0              228950.44600  228950.44119    0.00481    0.01500   0.00098  228950.44381    0.00219 0.5000
 2095:  60 17 43  0 59 17 42  0              228950.44600  228950.44643   -0.00043    0.01500   0.00098  228950.44381    0.00219 0.5000
 2096:  62  7 56  0 61  6 55  0              228987.34100  228987.32702    0.01398    0.03000   0.00131
 2097:  52 19 33  0 52 18 34  0              229151.85500  229151.84515    0.00985    0.03000   0.00453
 2098:  61  8 54  0 60  8 53  0              229265.33600  229265.34711   -0.01111    0.01500   0.00129
 2099:  26 11 16  0 25 10 15  0              229271.33100  229271.33744   -0.00644    0.03000   0.00099  229271.34068   -0.00968 0.5000
 2100:  26 11 15  0 25 10 16  0              229271.33100  229271.34391   -0.01291    0.03000   0.00099  229271.34068   -0.00968 0.5000
 2101:  16 14  3  0 15 13  2  0              229290.73100  229290.73063    0.00037    0.03000   0.00167  229290.73063    0.00037 0.5000
 2102:  16 14  2  0 15 13  3  0              229290.73100  229290.73063    0.00037    0.03000   0.00167  229290.73063    0.00037 0.5000
 2103:  51 19 32  0 51 18 33  0              229323.93700  229323.95409   -0.01709    0.03000   0.00453
 2104:  60 16 45  0 59 16 44  0              229346.72100  229346.67801    0.04299    0.01500   0.00100  229346.71967    0.00133 0.5000
 2105:  60 16 44  0 59 16 43  0              229346.72100  229346.76133   -0.04033    0.01500   0.00100  229346.71967    0.00133 0.5000
 2106:  60  9 52  0 59  9 51  0              229416.19800  229416.20531   -0.00731    0.01500   0.00121
 2107:  50 19 31  0 50 18 32  0              229485.99900  229486.01260   -0.01360    0.03000   0.00453
 2108:  61  7 54  0 60  7 53  0              229491.01300  229491.03435   -0.02135    0.01500   0.00133
 2109:  49 19 30  0 49 18 31  0              229638.47500  229638.46102    0.01398    0.03000   0.00454
 2110:  60 15 46  0 59 15 45  0              229840.49900  229840.48603    0.01297    0.01500   0.00105
 2111:  60 15 45  0 59 15 44  0              229841.61800  229841.61189    0.00611    0.01500   0.00105
 2112:  47 19 28  0 47 18 29  0              229916.18100  229916.21160   -0.03060    0.03000   0.00455
 2113:  46 19 27  0 46 18 28  0              230042.29000  230042.31940   -0.02940    0.03000   0.00455
 2114:  61 46 15  0 60 46 14  0              230146.46000  230146.47781   -0.01781    0.03000   0.00634
 2115:  45 19 26  0 45 18 27  0              230160.46900  230160.42979    0.03921    0.03000   0.00455
 2116:  61 44 17  0 60 44 16  0              230196.11700  230196.14607   -0.02907    0.03000   0.00494
 2117:  61 43 18  0 60 43 17  0              230222.72700  230222.71616    0.01084    0.03000   0.00435
 2118:  61 42 19  0 60 42 18  0              230250.60500  230250.61264   -0.00764    0.03000   0.00383
 2119:  44 19 25  0 44 18 26  0              230270.88700  230270.91223   -0.02523    0.03000   0.00456
 2120:  61 41 20  0 60 41 19  0              230279.96700  230279.98199   -0.01499    0.03000   0.00338
 2121:  61 40 21  0 60 40 20  0              230310.96200  230310.98942   -0.02742    0.03000   0.00300
 2122:  61 39 22  0 60 39 21  0              230343.80700  230343.82174   -0.01474    0.03000   0.00268
 2123:  43 19 24  0 43 18 25  0              230374.12600  230374.12394    0.00206    0.03000   0.00456
 2124:  61 37 24  0 60 37 23  0              230415.84600  230415.83838    0.00762    0.03000   0.00221
 2125:  61 36 25  0 60 36 24  0              230455.54900  230455.53985    0.00915    0.03000   0.00206
 2126:  60 14 47  0 59 14 46  0              230470.24700  230470.26921   -0.02221    0.01500   0.00113
 2127:  42 19 23  0 42 18 24  0              230470.39900  230470.41034   -0.01134    0.03000   0.00457
 2128:  60 14 46  0 59 14 45  0              230482.96000  230482.95367    0.00633    0.01500   0.00114
 2129:  61 35 26  0 60 35 25  0              230498.10300  230498.11172   -0.00872    0.03000   0.00194
 2130:  61 34 27  0 60 34 26  0              230543.92600  230543.91838    0.00762    0.03000   0.00185
 2131:  41 19 22  0 41 18 23  0              230560.08200  230560.10558   -0.02358    0.03000   0.00458
 2132:  61 33 28  0 60 33 27  0              230593.36500  230593.38137   -0.01637    0.03000   0.00178
 2133:  23 12 12  0 22 11 11  0              230622.45100  230622.46581   -0.01481    0.03000   0.00113  230622.46582   -0.01482 0.5000
 2134:  23 12 11  0 22 11 12  0              230622.45100  230622.46582   -0.01482    0.03000   0.00113  230622.46582   -0.01482 0.5000
 2135:  40 19 21  0 40 18 22  0              230643.53100  230643.53292   -0.00192    0.03000   0.00458
 2136:  61 32 29  0 60 32 28  0              230646.99100  230646.99062    0.00038    0.03000   0.00172
 2137:  61 31 30  0 60 31 29  0              230705.31700  230705.31841   -0.00141    0.03000   0.00167
 2138:  39 19 20  0 39 18 21  0              230720.96500  230721.00516   -0.04016    0.03000   0.00459
 2139:  58  9 49  0 57  9 48  0              230726.37200  230726.38254   -0.01054    0.01500   0.00118
 2140:  61 30 31  0 60 30 30  0              230769.03300  230769.03682   -0.00382    0.01500   0.00163
 2141:  38 19 19  0 38 18 20  0              230792.80700  230792.82495   -0.01795    0.03000   0.00459
 2142:  61 29 32  0 60 29 31  0              230838.94900  230838.93977    0.00923    0.01500   0.00158
 2143:  37 19 18  0 37 18 19  0              230859.22900  230859.28518   -0.05618    0.03000   0.00460
 2144:  58 10 48  0 57 10 47  0              230861.98400  230862.00091   -0.01691    0.01500   0.00205
 2145:  61 28 33  0 60 28 32  0              230915.98500  230915.97106    0.01394    0.01500   0.00153
 2146:  36 19 17  0 36 18 18  0              230920.66900  230920.66924   -0.00024    0.03000   0.00460
 2147:  35 19 16  0 35 18 17  0              230977.25100  230977.25129   -0.00029    0.03000   0.00461
 2148:  61 27 34  0 60 27 33  0              231001.24700  231001.26050   -0.01350    0.01500   0.00148
 2149:  61 26 35  0 60 26 34  0              231096.18600  231096.17087    0.01513    0.01500   0.00142
 2150:  32 19 13  0 32 18 14  0              231120.82100  231120.79377    0.02723    0.03000   0.00463
 2151:  61 25 36  0 60 25 35  0              231202.34200  231202.35993   -0.01793    0.01500   0.00136
 2152:  60  8 52  0 59  8 51  0              231244.70000  231244.70366   -0.00366    0.01500   0.00143
 2153:  61 24 37  0 60 24 36  0              231321.86300  231321.86334   -0.00034    0.01500   0.00130
 2154:  60 13 47  0 59 13 46  0              231390.65600  231390.66956   -0.01356    0.01500   0.00129
 2155:  61 23 38  0 60 23 37  0              231457.20500  231457.20747   -0.00247    0.01500   0.00123
 2156:  61 22 39  0 60 22 38  0              231611.56500  231611.56585   -0.00085    0.01500   0.00117
 2157:  59 11 48  0 58 11 47  0              231647.34600  231647.33716    0.00884    0.01500   0.00218
 2158:  61 21 40  0 60 21 39  0              231788.99800  231788.98096    0.01704    0.01500   0.00112
 2159:  69  0 69  0 68  0 68  0              231849.64600  231849.66012   -0.01412    0.01500   0.00288  231849.66012   -0.01412 0.2500
 2160:  69  1 69  0 68  1 68  0              231849.64600  231849.66012   -0.01412    0.01500   0.00288  231849.66012   -0.01412 0.2500
 2161:  69  0 69  0 68  1 68  0              231849.64600  231849.66012   -0.01412    0.01500   0.00288  231849.66012   -0.01412 0.2500
 2162:  69  1 69  0 68  0 68  0              231849.64600  231849.66012   -0.01412    0.01500   0.00288  231849.66012   -0.01412 0.2500
 2163:  68  1 67  0 67  1 66  0              231850.96600  231850.96566    0.00034    0.01500   0.00221  231850.96566    0.00034 0.2500
 2164:  68  2 67  0 67  2 66  0              231850.96600  231850.96566    0.00034    0.01500   0.00221  231850.96566    0.00034 0.2500
 2165:  68  1 67  0 67  2 66  0              231850.96600  231850.96566    0.00034    0.01500   0.00221  231850.96566    0.00034 0.2500
 2166:  68  2 67  0 67  1 66  0              231850.96600  231850.96566    0.00034    0.01500   0.00221  231850.96566    0.00034 0.2500
 2167:  67  2 65  0 66  2 64  0              231859.52400  231859.51447    0.00953    0.01500   0.00174  231859.51447    0.00953 0.2500
 2168:  67  3 65  0 66  3 64  0              231859.52400  231859.51446    0.00954    0.01500   0.00174  231859.51447    0.00953 0.2500
 2169:  67  2 65  0 66  3 64  0              231859.52400  231859.51445    0.00955    0.01500   0.00174  231859.51447    0.00953 0.2500
 2170:  67  3 65  0 66  2 64  0              231859.52400  231859.51448    0.00952    0.01500   0.00174  231859.51447    0.00953 0.2500
 2171:  20 13  7  0 19 12  8  0              231863.84700  231863.86865   -0.02165    0.03000   0.00135  231863.86865   -0.02165 0.5000
 2172:  20 13  8  0 19 12  7  0              231863.84700  231863.86865   -0.02165    0.03000   0.00135  231863.86865   -0.02165 0.5000
 2173:  66  4 63  0 65  4 62  0              231883.88800  231883.87009    0.01791    0.01500   0.00147  231883.87034    0.01766 0.2500
 2174:  66  3 63  0 65  3 62  0              231883.88800  231883.87058    0.01742    0.01500   0.00147  231883.87034    0.01766 0.2500
 2175:  66  3 63  0 65  4 62  0              231883.88800  231883.86921    0.01879    0.01500   0.00147  231883.87034    0.01766 0.2500
 2176:  66  4 63  0 65  3 62  0              231883.88800  231883.87146    0.01654    0.01500   0.00147  231883.87034    0.01766 0.2500
 2177:  60 10 51  0 59 10 50  0              231902.93100  231902.95287   -0.02187    0.01500   0.00118
 2178:  65  5 61  0 64  5 60  0              231937.91900  231937.90682    0.01218    0.01500   0.00136  231937.91699    0.00201 0.2500
 2179:  65  4 61  0 64  4 60  0              231937.91900  231937.92716   -0.00816    0.01500   0.00136  231937.91699    0.00201 0.2500
 2180:  65  4 61  0 64  5 60  0              231937.91900  231937.86881    0.05019    0.01500   0.00136  231937.91699    0.00201 0.2500
 2181:  65  5 61  0 64  4 60  0              231937.91900  231937.96517   -0.04617    0.01500   0.00136  231937.91699    0.00201 0.2500
 2182:  61 20 41  0 60 20 40  0              231994.68400  231994.68712   -0.00312    0.01500   0.00107
 2183:  64  6 59  0 63  6 58  0              232045.23600  232045.21363    0.02237    0.01500   0.00134
 2184:  64  5 59  0 63  5 58  0              232045.77400  232045.79354   -0.01954    0.01500   0.00134
 2185:  64  6 59  0 63  5 58  0              232046.98300  232046.96003    0.02297    0.03000   0.00134
 2186:  60 12 49  0 59 12 48  0              232184.48300  232184.47006    0.01294    0.01500   0.00132
 2187:  63  6 57  0 62  7 56  0              232219.87000  232219.86907    0.00093    0.03000   0.00135
 2188:  61 19 42  0 60 19 41  0              232235.59900  232235.59578    0.00322    0.01500   0.00104
 2189:  63  7 57  0 62  7 56  0              232245.70300  232245.70564   -0.00264    0.01500   0.00135
 2190:  63  6 57  0 62  6 56  0              232257.40400  232257.42190   -0.01790    0.01500   0.00136
 2191:  61 18 43  0 60 18 42  0              232521.06300  232521.05380    0.00920    0.01500   0.00102
 2192:  62  8 55  0 61  8 54  0              232573.84900  232573.85771   -0.00871    0.01500   0.00135
 2193:  60 11 50  0 59 11 49  0              232704.06200  232704.07635   -0.01435    0.01500   0.00128
 2194:  62  7 55  0 61  7 54  0              232738.05400  232738.06090   -0.00690    0.01500   0.00138
 2195:  61  9 53  0 60  9 52  0              232808.09800  232808.09745    0.00055    0.01500   0.00127
 2196:  61 17 45  0 60 17 44  0              232864.07400  232864.08193   -0.00793    0.01500   0.00103  232864.08643   -0.01243 0.5000
 2197:  61 17 44  0 60 17 43  0              232864.07400  232864.09094   -0.01694    0.01500   0.00103  232864.08643   -0.01243 0.5000
 2198:  60 12 48  0 59 12 47  0              232986.72100  232986.72804   -0.00704    0.01500   0.00168
 2199:  27 11 17  0 26 10 16  0              232989.19200  232989.22683   -0.03483    0.03000   0.00098  232989.23409   -0.04209 0.5000
 2200:  27 11 16  0 26 10 17  0              232989.19200  232989.24135   -0.04935    0.03000   0.00098  232989.23409   -0.04209 0.5000
 2201:  17 14  3  0 16 13  4  0              233063.75600  233063.76559   -0.00959    0.03000   0.00167  233063.76559   -0.00959 0.5000
 2202:  17 14  4  0 16 13  3  0              233063.75600  233063.76559   -0.00959    0.03000   0.00167  233063.76559   -0.00959 0.5000
 2203:  61 16 46  0 60 16 45  0              233283.57300  233283.50618    0.06682    0.01500   0.00106  233283.57497   -0.00197 0.5000
 2204:  61 16 45  0 60 16 44  0              233283.57300  233283.64376   -0.07076    0.01500   0.00106  233283.57497   -0.00197 0.5000
 2205:  61 15 47  0 60 15 46  0              233807.53200  233807.50923    0.02277    0.01500   0.00112
 2206:  61 15 46  0 60 15 45  0              233809.28100  233809.29325   -0.01225    0.01500   0.00112
 2207:  62 45 17  0 61 45 16  0              233952.95800  233952.96067   -0.00267    0.03000   0.00569
 2208:  62 43 19  0 61 43 18  0              234007.05400  234007.07801   -0.02401    0.03000   0.00444
 2209:  62 42 20  0 61 42 19  0              234036.15900  234036.16498   -0.00598    0.03000   0.00393
 2210:  62 41 21  0 61 41 20  0              234066.81100  234066.80368    0.00732    0.03000   0.00349
 2211:  59  9 50  0 58  9 49  0              234101.68300  234101.65974    0.02326    0.01500   0.00120
 2212:  62 39 23  0 61 39 22  0              234133.42400  234133.45316   -0.02916    0.03000   0.00280
 2213:  62 38 24  0 61 38 23  0              234169.86700  234169.88296   -0.01596    0.03000   0.00255
 2214:  62 37 25  0 61 37 24  0              234208.73000  234208.71068    0.01932    0.03000   0.00235
 2215:  61  8 53  0 60  8 52  0              234248.46800  234248.47262   -0.00462    0.01500   0.00147
 2216:  62 34 28  0 61 34 27  0              234342.69200  234342.70114   -0.00914    0.03000   0.00198
 2217:  24 12 13  0 23 11 12  0              234374.25000  234374.25681   -0.00681    0.03000   0.00112  234374.25682   -0.00682 0.5000
 2218:  24 12 12  0 23 11 13  0              234374.25000  234374.25683   -0.00683    0.03000   0.00112  234374.25682   -0.00682 0.5000
 2219:  62 33 29  0 61 33 28  0              234394.46500  234394.48693   -0.02193    0.03000   0.00190
 2220:  62 32 30  0 61 32 29  0              234450.66200  234450.63458    0.02742    0.03000   0.00184
 2221:  61 14 48  0 60 14 47  0              234476.77200  234476.79810   -0.02610    0.03000   0.00121
 2222:  61 14 47  0 60 14 46  0              234496.04200  234496.03758    0.00442    0.01500   0.00122
 2223:  62 31 31  0 61 31 30  0              234511.76300  234511.74611    0.01689    0.03000   0.00178
 2224:  62 29 33  0 61 29 32  0              234651.84500  234651.81807    0.02693    0.03000   0.00168
 2225:  62 28 34  0 61 28 33  0              234732.62300  234732.60802    0.01498    0.03000   0.00162
 2226:  62 27 35  0 61 27 34  0              234822.09200  234822.08884    0.00316    0.01500   0.00156
 2227:  62 26 36  0 61 26 35  0              234921.69800  234921.69708    0.00092    0.01500   0.00149
 2228:  62 24 38  0 61 24 37  0              235158.69100  235158.69115   -0.00015    0.01500   0.00136
 2229:  70  0 70  0 69  0 69  0              235181.99200  235181.99044    0.00156    0.01500   0.00302  235181.99044    0.00156 0.2500
 2230:  70  1 70  0 69  1 69  0              235181.99200  235181.99044    0.00156    0.01500   0.00302  235181.99044    0.00156 0.2500
 2231:  70  0 70  0 69  1 69  0              235181.99200  235181.99044    0.00156    0.01500   0.00302  235181.99044    0.00156 0.2500
 2232:  70  1 70  0 69  0 69  0              235181.99200  235181.99044    0.00156    0.01500   0.00302  235181.99044    0.00156 0.2500
 2233:  69  1 68  0 68  1 67  0              235183.22400  235183.20283    0.02117    0.01500   0.00233  235183.20283    0.02117 0.2500
 2234:  69  2 68  0 68  2 67  0              235183.22400  235183.20283    0.02117    0.01500   0.00233  235183.20283    0.02117 0.2500
 2235:  69  1 68  0 68  2 67  0              235183.22400  235183.20283    0.02117    0.01500   0.00233  235183.20283    0.02117 0.2500
 2236:  69  2 68  0 68  1 67  0              235183.22400  235183.20283    0.02117    0.01500   0.00233  235183.20283    0.02117 0.2500
 2237:  68  2 66  0 67  2 65  0              235191.39400  235191.38489    0.00911    0.01500   0.00184  235191.38489    0.00911 0.2500
 2238:  68  3 66  0 67  3 65  0              235191.39400  235191.38488    0.00912    0.01500   0.00184  235191.38489    0.00911 0.2500
 2239:  68  2 66  0 67  3 65  0              235191.39400  235191.38487    0.00913    0.01500   0.00184  235191.38489    0.00911 0.2500
 2240:  68  3 66  0 67  2 65  0              235191.39400  235191.38490    0.00910    0.01500   0.00184  235191.38489    0.00911 0.2500
 2241:  67  4 64  0 66  4 63  0              235214.75900  235214.73774    0.02126    0.01500   0.00155  235214.73790    0.02110 0.2500
 2242:  67  3 64  0 66  3 63  0              235214.75900  235214.73806    0.02094    0.01500   0.00155  235214.73790    0.02110 0.2500
 2243:  67  3 64  0 66  4 63  0              235214.75900  235214.73719    0.02181    0.01500   0.00155  235214.73790    0.02110 0.2500
 2244:  67  4 64  0 66  3 63  0              235214.75900  235214.73862    0.02038    0.01500   0.00155  235214.73790    0.02110 0.2500
 2245:  59 10 49  0 58 10 48  0              235261.58400  235261.57078    0.01322    0.01500   0.00204
 2246:  66  5 62  0 65  5 61  0              235266.46400  235266.43213    0.03187    0.03000   0.00143  235266.43877    0.02523 0.2500
 2247:  66  4 62  0 65  4 61  0              235266.46400  235266.44542    0.01858    0.03000   0.00143  235266.43877    0.02523 0.2500
 2248:  66  4 62  0 65  5 61  0              235266.46400  235266.40741    0.05659    0.03000   0.00143  235266.43877    0.02523 0.2500
 2249:  66  5 62  0 65  4 61  0              235266.46400  235266.47014   -0.00614    0.03000   0.00143  235266.43877    0.02523 0.2500
 2250:  62 23 39  0 61 23 38  0              235300.88200  235300.89618   -0.01418    0.01500   0.00129
 2251:  61 13 49  0 60 13 48  0              235324.64800  235324.64750    0.00050    0.01500   0.00133
 2252:  65  6 60  0 64  6 59  0              235368.64600  235368.65781   -0.01181    0.01500   0.00140
 2253:  65  5 60  0 64  5 59  0              235369.03100  235369.04700   -0.01600    0.01500   0.00140
 2254:  65  6 60  0 64  5 59  0              235369.79600  235369.82429   -0.02829    0.03000   0.00140
 2255:  61 13 48  0 60 13 47  0              235491.58900  235491.57118    0.01782    0.01500   0.00142
 2256:  61 10 52  0 60 10 51  0              235527.08700  235527.07712    0.00988    0.01500   0.00123
 2257:  64  7 58  0 63  7 57  0              235559.29700  235559.30453   -0.00753    0.01500   0.00141
 2258:  64  6 58  0 63  6 57  0              235567.41300  235567.42396   -0.01096    0.01500   0.00141
 2259:  21 13  9  0 20 12  8  0              235630.53700  235630.51421    0.02279    0.03000   0.00135  235630.51421    0.02279 0.5000
 2260:  21 13  8  0 20 12  9  0              235630.53700  235630.51421    0.02279    0.03000   0.00135  235630.51421    0.02279 0.5000
 2261:  62 21 41  0 61 21 40  0              235649.75000  235649.75242   -0.00242    0.01500   0.00117
 2262:  62 20 42  0 61 20 41  0              235866.25100  235866.24871    0.00229    0.01500   0.00112
 2263:  63  8 56  0 62  8 55  0              235879.73900  235879.73235    0.00665    0.01500   0.00141
 2264:  63  7 56  0 62  7 55  0              235998.43400  235998.43507   -0.00107    0.01500   0.00143
 2265:  62 19 43  0 61 19 42  0              236120.00500  236120.00547   -0.00047    0.01500   0.00109
 2266:  62  9 54  0 61  9 53  0              236176.30700  236176.31203   -0.00503    0.01500   0.00134
 2267:  61 12 50  0 60 12 49  0              236234.28600  236234.29744   -0.01144    0.01500   0.00141
 2268:  60 11 49  0 59 11 48  0              236291.23600  236291.22151    0.01449    0.01500   0.00243
 2269:  62 18 44  0 61 18 43  0              236421.02700  236421.01493    0.01207    0.01500   0.00108
 2270:  61 11 51  0 60 11 50  0              236610.83900  236610.83851    0.00049    0.01500   0.00133
 2271:  28 11 18  0 27 10 17  0              236697.75000  236697.71725    0.03275    0.03000   0.00098  236697.73298    0.01702 0.5000
 2272:  28 11 17  0 27 10 18  0              236697.75000  236697.74872    0.00128    0.03000   0.00098  236697.73298    0.01702 0.5000
 2273:  62 17 46  0 61 17 45  0              236783.27300  236783.26238    0.01062    0.01500   0.00109  236783.27003    0.00297 0.5000
 2274:  62 17 45  0 61 17 44  0              236783.27300  236783.27769   -0.00469    0.01500   0.00109  236783.27003    0.00297 0.5000
 2275:  18 14  5  0 17 13  4  0              236836.16900  236836.14738    0.02162    0.03000   0.00166  236836.14738    0.02162 0.5000
 2276:  18 14  4  0 17 13  5  0              236836.16900  236836.14738    0.02162    0.03000   0.00166  236836.14738    0.02162 0.5000
 2277:  62 16 47  0 61 16 46  0              237227.18500  237227.08592    0.09908    0.01500   0.00113  237227.19836   -0.01336 0.5000
 2278:  62 16 46  0 61 16 45  0              237227.18500  237227.31079   -0.12579    0.01500   0.00113  237227.19836   -0.01336 0.5000
 2279:  62  8 54  0 61  8 53  0              237294.18400  237294.18207    0.00193    0.01500   0.00151
 2280:  61 12 49  0 60 12 48  0              237321.24400  237321.22360    0.02040    0.01500   0.00191
 2281:  62 15 48  0 61 15 47  0              237782.97000  237782.97282   -0.00282    0.01500   0.00121
 2282:  15 15  1  0 14 14  0  0              238024.94500  238024.96091   -0.01591    0.03000   0.00208  238024.96091   -0.01591 0.5000
 2283:  15 15  0  0 14 14  1  0              238024.94500  238024.96091   -0.01591    0.03000   0.00208  238024.96091   -0.01591 0.5000
 2284:  25 12 14  0 24 11 13  0              238121.33400  238121.34919   -0.01519    0.03000   0.00112  238121.34922   -0.01522 0.5000
 2285:  25 12 13  0 24 11 14  0              238121.33400  238121.34925   -0.01525    0.03000   0.00112  238121.34922   -0.01522 0.5000
 2286:  63 32 31  0 62 32 30  0              238255.39300  238255.38357    0.00943    0.03000   0.00197
 2287:  63 31 32  0 62 31 31  0              238319.36000  238319.37027   -0.01027    0.03000   0.00191
 2288:  63 30 33  0 62 30 32  0              238389.28600  238389.31854   -0.03254    0.03000   0.00184
 2289:  63 29 34  0 62 29 33  0              238466.09500  238466.10747   -0.01247    0.03000   0.00178
 2290:  71  1 71  0 70  1 70  0              238514.15200  238514.16567   -0.01367    0.01500   0.00318  238514.16567   -0.01367 0.2500
 2291:  71  0 71  0 70  0 70  0              238514.15200  238514.16567   -0.01367    0.01500   0.00318  238514.16567   -0.01367 0.2500
 2292:  71  1 71  0 70  0 70  0              238514.15200  238514.16567   -0.01367    0.01500   0.00318  238514.16567   -0.01367 0.2500
 2293:  71  0 71  0 70  1 70  0              238514.15200  238514.16567   -0.01367    0.01500   0.00318  238514.16567   -0.01367 0.2500
 2294:  70  1 69  0 69  1 68  0              238515.30100  238515.28907    0.01193    0.01500   0.00247  238515.28907    0.01193 0.2500
 2295:  70  2 69  0 69  2 68  0              238515.30100  238515.28907    0.01193    0.01500   0.00247  238515.28907    0.01193 0.2500
 2296:  70  1 69  0 69  2 68  0              238515.30100  238515.28907    0.01193    0.01500   0.00247  238515.28907    0.01193 0.2500
 2297:  70  2 69  0 69  1 68  0              238515.30100  238515.28907    0.01193    0.01500   0.00247  238515.28907    0.01193 0.2500
 2298:  62 14 48  0 61 14 47  0              238522.39900  238522.43764   -0.03864    0.03000   0.00133
 2299:  69  2 67  0 68  2 66  0              238523.12400  238523.12217    0.00183    0.01500   0.00196  238523.12217    0.00183 0.2500
 2300:  69  3 67  0 68  3 66  0              238523.12400  238523.12217    0.00183    0.01500   0.00196  238523.12217    0.00183 0.2500
 2301:  69  2 67  0 68  3 66  0              238523.12400  238523.12216    0.00184    0.01500   0.00196  238523.12217    0.00183 0.2500
 2302:  69  3 67  0 68  2 66  0              238523.12400  238523.12218    0.00182    0.01500   0.00196  238523.12217    0.00183 0.2500
 2303:  68  4 65  0 67  4 64  0              238545.53000  238545.52606    0.00394    0.01500   0.00165  238545.52616    0.00384 0.2500
 2304:  68  3 65  0 67  3 64  0              238545.53000  238545.52626    0.00374    0.01500   0.00165  238545.52616    0.00384 0.2500
 2305:  68  3 65  0 67  4 64  0              238545.53000  238545.52570    0.00430    0.01500   0.00165  238545.52616    0.00384 0.2500
 2306:  68  4 65  0 67  3 64  0              238545.53000  238545.52661    0.00339    0.01500   0.00165  238545.52616    0.00384 0.2500
 2307:  63 28 35  0 62 28 34  0              238550.76700  238550.78295   -0.01595    0.03000   0.00172
 2308:  67  5 63  0 66  5 62  0              238595.03400  238595.01843    0.01557    0.01500   0.00151  238595.02276    0.01124 0.2500
 2309:  67  4 63  0 66  4 62  0              238595.03400  238595.02710    0.00690    0.01500   0.00151  238595.02276    0.01124 0.2500
 2310:  67  4 63  0 66  5 62  0              238595.03400  238595.00238    0.03162    0.01500   0.00151  238595.02276    0.01124 0.2500
 2311:  67  5 63  0 66  4 62  0              238595.03400  238595.04315   -0.00915    0.01500   0.00151  238595.02276    0.01124 0.2500
 2312:  63 26 37  0 62 26 36  0              238749.07900  238749.06667    0.01233    0.03000   0.00158
 2313:  63 25 38  0 62 25 37  0              238866.03600  238866.03204    0.00396    0.03000   0.00150
 2314:  65  7 59  0 64  7 58  0              238873.77400  238873.75928    0.01472    0.01500   0.00148
 2315:  65  6 59  0 64  6 58  0              238879.35800  238879.36519   -0.00719    0.01500   0.00148
 2316:  63 24 39  0 62 24 38  0              238997.74500  238997.76222   -0.01722    0.03000   0.00143
 2317:  62 10 53  0 61 10 52  0              239103.97400  239103.98121   -0.00721    0.01500   0.00130
 2318:  63 16 48  0 62 16 47  0              241177.83100  241177.67840    0.15260    0.03000   0.00122  241177.86035   -0.02935 0.5000
 2319:  63 16 47  0 62 16 46  0              241177.83100  241178.04231   -0.21131    0.03000   0.00122  241177.86035   -0.02935 0.5000
 2320:  62 12 50  0 61 12 49  0              241725.71600  241725.74804   -0.03204    0.03000   0.00219
 2321:  64 38 26  0 63 38 25  0              241754.38600  241754.39685   -0.01085    0.03000   0.00285
 2322:  63 15 49  0 62 15 48  0              241767.20900  241767.21843   -0.00943    0.01500   0.00131
 2323:  64 36 28  0 63 36 27  0              241842.05700  241842.06088   -0.00388    0.03000   0.00250
 2324:  72  1 72  0 71  1 71  0              241846.17400  241846.18357   -0.00957    0.01500   0.00336  241846.18357   -0.00957 0.2500
 2325:  72  0 72  0 71  0 71  0              241846.17400  241846.18357   -0.00957    0.01500   0.00336  241846.18357   -0.00957 0.2500
 2326:  72  1 72  0 71  0 71  0              241846.17400  241846.18357   -0.00957    0.01500   0.00336  241846.18357   -0.00957 0.2500
 2327:  72  0 72  0 71  1 71  0              241846.17400  241846.18357   -0.00957    0.01500   0.00336  241846.18357   -0.00957 0.2500
 2328:  71  1 70  0 70  1 69  0              241847.22600  241847.22190    0.00410    0.01500   0.00263  241847.22190    0.00410 0.2500
 2329:  71  2 70  0 70  2 69  0              241847.22600  241847.22190    0.00410    0.01500   0.00263  241847.22190    0.00410 0.2500
 2330:  71  1 70  0 70  2 69  0              241847.22600  241847.22190    0.00410    0.01500   0.00263  241847.22190    0.00410 0.2500
 2331:  71  2 70  0 70  1 69  0              241847.22600  241847.22190    0.00410    0.01500   0.00263  241847.22190    0.00410 0.2500
 2332:  70  2 68  0 69  2 67  0              241854.72800  241854.72266    0.00534    0.01500   0.00210  241854.72266    0.00534 0.2500
 2333:  70  3 68  0 69  3 67  0              241854.72800  241854.72266    0.00534    0.01500   0.00210  241854.72266    0.00534 0.2500
 2334:  70  2 68  0 69  3 67  0              241854.72800  241854.72266    0.00534    0.01500   0.00210  241854.72266    0.00534 0.2500
 2335:  70  3 68  0 69  2 67  0              241854.72800  241854.72267    0.00533    0.01500   0.00210  241854.72266    0.00534 0.2500
 2336:  69  3 66  0 68  4 65  0              241876.20500  241876.22727   -0.02227    0.01500   0.00177  241876.22756   -0.02256 0.2500
 2337:  69  4 66  0 68  4 65  0              241876.20500  241876.22750   -0.02250    0.01500   0.00177  241876.22756   -0.02256 0.2500
 2338:  69  3 66  0 68  3 65  0              241876.20500  241876.22762   -0.02262    0.01500   0.00177  241876.22756   -0.02256 0.2500
 2339:  69  4 66  0 68  3 65  0              241876.20500  241876.22785   -0.02285    0.01500   0.00177  241876.22756   -0.02256 0.2500
 2340:  64 35 29  0 63 35 28  0              241890.71300  241890.71334   -0.00034    0.03000   0.00238
 2341:  68  5 64  0 67  5 63  0              241923.65600  241923.64713    0.00887    0.01500   0.00161  241923.64996    0.00604 0.2500
 2342:  68  4 64  0 67  4 63  0              241923.65600  241923.65278    0.00322    0.01500   0.00161  241923.64996    0.00604 0.2500
 2343:  68  4 64  0 67  5 63  0              241923.65600  241923.63673    0.01927    0.01500   0.00161  241923.64996    0.00604 0.2500
 2344:  68  5 64  0 67  4 63  0              241923.65600  241923.66318   -0.00718    0.01500   0.00161  241923.64996    0.00604 0.2500
 2345:  64 34 30  0 63 34 29  0              241943.14200  241943.12409    0.01791    0.03000   0.00227
 2346:  64 33 31  0 63 33 30  0              241999.77700  241999.78218   -0.00518    0.03000   0.00219
 2347:  67  6 62  0 66  6 61  0              242016.77000  242016.67761    0.09239    0.01500   0.00157  242016.76459    0.00541 0.5000
 2348:  67  5 62  0 66  5 61  0              242016.77000  242016.85157   -0.08157    0.01500   0.00157  242016.76459    0.00541 0.5000
 2349:  64 32 32  0 63 32 31  0              242061.27600  242061.25633    0.01967    0.03000   0.00211
 2350:  66  7 60  0 65  7 59  0              242189.05700  242189.06319   -0.00619    0.01500   0.00156
 2351:  64 30 34  0 63 30 33  0              242201.39800  242201.42883   -0.03083    0.03000   0.00197
 2352:  64 29 35  0 63 29 34  0              242281.84700  242281.83282    0.01418    0.03000   0.00190
 2353:  64 28 36  0 63 28 35  0              242370.53800  242370.52337    0.01463    0.03000   0.00182
 2354:  64 27 37  0 63 27 36  0              242468.80100  242468.81924   -0.01824    0.03000   0.00175
 2355:  65  8 58  0 64  8 57  0              242487.99900  242487.96462    0.03438    0.03000   0.00156
 2356:  63 14 50  0 62 14 49  0              242520.67700  242520.66125    0.01575    0.01500   0.00143
 2357:  65  7 58  0 64  7 57  0              242548.96600  242548.93596    0.03004    0.03000   0.00157
 2358:  63 14 49  0 62 14 48  0              242563.62700  242563.61438    0.01262    0.01500   0.00145
 2359:  64 26 38  0 63 26 37  0              242578.31800  242578.31405    0.00395    0.03000   0.00167
 2360:  64 25 39  0 63 25 38  0              242700.94200  242700.95063   -0.00863    0.03000   0.00159
 2361:  64 24 40  0 63 24 39  0              242839.09500  242839.12109   -0.02609    0.03000   0.00151
 2362:  64  9 56  0 63  9 55  0              242858.24500  242858.25700   -0.01200    0.01500   0.00150
 2363:  64 23 41  0 63 23 40  0              242995.80100  242995.80406   -0.00306    0.03000   0.00143
 2364:  64 22 42  0 63 22 41  0              243174.77600  243174.75667    0.01933    0.03000   0.00137
 2365:  64 21 43  0 63 21 42  0              243380.79100  243380.78983    0.00117    0.03000   0.00131
 2366:  62  9 53  0 61  9 52  0              243392.23500  243392.21979    0.01521    0.01500   0.00153
 2367:  63 13 51  0 62 13 50  0              243447.00400  243446.99807    0.00593    0.01500   0.00156
 2368:  64  8 56  0 63  8 55  0              243507.11700  243507.10687    0.01013    0.01500   0.00162
 2369:  61 10 51  0 60 10 50  0              243610.64400  243610.68013   -0.03613    0.03000   0.00191
 2370:  64 20 44  0 63 20 43  0              243620.17100  243620.17467   -0.00367    0.03000   0.00126
 2371:  63 13 50  0 62 13 49  0              243783.78600  243783.78815   -0.00215    0.01500   0.00175
 2372:  64 19 45  0 63 19 44  0              243901.25500  243901.26409   -0.00909    0.03000   0.00124
 2373:  64 17 48  0 63 17 47  0              244639.03900  244638.99797    0.04103    0.03000   0.00126  244639.01944    0.01956 0.5000
 2374:  64 17 47  0 63 17 46  0              244639.03900  244639.04091   -0.00191    0.03000   0.00126  244639.01944    0.01956 0.5000
 2375:  73  1 73  0 72  1 72  0              245178.01800  245178.04192   -0.02392    0.01500   0.00356  245178.04192   -0.02392 0.2500
 2376:  73  0 73  0 72  0 72  0              245178.01800  245178.04192   -0.02392    0.01500   0.00356  245178.04192   -0.02392 0.2500
 2377:  73  1 73  0 72  0 72  0              245178.01800  245178.04192   -0.02392    0.01500   0.00356  245178.04192   -0.02392 0.2500
 2378:  73  0 73  0 72  1 72  0              245178.01800  245178.04192   -0.02392    0.01500   0.00356  245178.04192   -0.02392 0.2500
 2379:  72  1 71  0 71  1 70  0              245179.00000  245178.99886    0.00114    0.01500   0.00281  245178.99886    0.00114 0.2500
 2380:  72  2 71  0 71  2 70  0              245179.00000  245178.99886    0.00114    0.01500   0.00281  245178.99886    0.00114 0.2500
 2381:  72  1 71  0 71  2 70  0              245179.00000  245178.99886    0.00114    0.01500   0.00281  245178.99886    0.00114 0.2500
 2382:  72  2 71  0 71  1 70  0              245179.00000  245178.99886    0.00114    0.01500   0.00281  245178.99886    0.00114 0.2500
 2383:  71  2 69  0 70  2 68  0              245186.16900  245186.18284   -0.01384    0.01500   0.00226  245186.18284   -0.01384 0.2500
 2384:  71  3 69  0 70  3 68  0              245186.16900  245186.18283   -0.01383    0.01500   0.00226  245186.18284   -0.01384 0.2500
 2385:  71  2 69  0 70  3 68  0              245186.16900  245186.18283   -0.01383    0.01500   0.00226  245186.18284   -0.01384 0.2500
 2386:  71  3 69  0 70  2 68  0              245186.16900  245186.18284   -0.01384    0.01500   0.00226  245186.18284   -0.01384 0.2500
 2387:  70  4 67  0 69  4 66  0              245206.87000  245206.83499    0.03501    0.03000   0.00191  245206.83504    0.03496 0.2500
 2388:  70  3 67  0 69  3 66  0              245206.87000  245206.83508    0.03492    0.03000   0.00191  245206.83504    0.03496 0.2500
 2389:  70  3 67  0 69  4 66  0              245206.87000  245206.83485    0.03515    0.03000   0.00191  245206.83504    0.03496 0.2500
 2390:  70  4 67  0 69  3 66  0              245206.87000  245206.83522    0.03478    0.03000   0.00191  245206.83504    0.03496 0.2500
 2391:  69  5 65  0 68  5 64  0              245252.30600  245252.30114    0.00486    0.01500   0.00174  245252.30297    0.00303 0.2500
 2392:  69  4 65  0 68  4 64  0              245252.30600  245252.30481    0.00119    0.01500   0.00174  245252.30297    0.00303 0.2500
 2393:  69  4 65  0 68  5 64  0              245252.30600  245252.29440    0.01160    0.01500   0.00174  245252.30297    0.00303 0.2500
 2394:  69  5 65  0 68  4 64  0              245252.30600  245252.31154   -0.00554    0.01500   0.00174  245252.30297    0.00303 0.2500
 2395:  68  6 63  0 67  6 62  0              245341.25100  245341.16985    0.08115    0.01500   0.00167  245341.22778    0.02322 0.2500
 2396:  68  5 63  0 67  5 62  0              245341.25100  245341.28572   -0.03472    0.01500   0.00167  245341.22778    0.02322 0.2500
 2397:  68  5 63  0 67  6 62  0              245341.25100  245340.94289    0.30811    0.01500   0.00167  245341.22778    0.02322 0.2500
 2398:  68  6 63  0 67  5 62  0              245341.25100  245341.51267   -0.26167    0.01500   0.00167  245341.22778    0.02322 0.2500
 2399:  62 11 51  0 61 11 50  0              245644.96000  245644.94414    0.01586    0.01500   0.00285
 2400:  64 15 49  0 63 15 48  0              245767.26500  245767.28182   -0.01682    0.01500   0.00143
 2401:  66  8 59  0 65  8 58  0              245791.79300  245791.82749   -0.03449    0.03000   0.00165
 2402:  66  7 59  0 65  7 58  0              245835.19300  245835.18634    0.00666    0.01500   0.00166
 2403:  65 32 33  0 64 32 32  0              245868.28700  245868.27170    0.01530    0.03000   0.00227
 2404:  65 31 34  0 64 31 33  0              245938.32500  245938.29009    0.03491    0.03000   0.00219
 2405:  65 30 35  0 64 30 34  0              246014.85600  246014.88226   -0.02626    0.03000   0.00211
 2406:  65 29 36  0 64 29 35  0              246099.02700  246099.01916    0.00784    0.03000   0.00203
 2407:  64 10 55  0 63 10 54  0              246126.06800  246126.08447   -0.01647    0.01500   0.00147
 2408:  65  9 57  0 64  9 56  0              246179.35400  246179.36243   -0.00843    0.01500   0.00160
 2409:  65 28 37  0 64 28 36  0              246191.88500  246191.85709    0.02791    0.03000   0.00194
 2410:  63 12 51  0 62 12 50  0              246206.42900  246206.42152    0.00748    0.01500   0.00251
 2411:  65 27 38  0 64 27 37  0              246294.79400  246294.78302    0.01098    0.03000   0.00186
 2412:  63  9 54  0 62  9 53  0              246315.21900  246315.24643   -0.02743    0.01500   0.00166
 2413:  65 26 39  0 64 26 38  0              246409.47700  246409.47414    0.00286    0.03000   0.00177
 2414:  65 25 40  0 64 25 39  0              246537.98100  246537.97680    0.00420    0.03000   0.00169
 2415:  65 22 43  0 64 22 42  0              247034.92500  247034.89166    0.03334    0.03000   0.00145
 2416:  65 21 44  0 64 21 43  0              247251.19500  247251.20225   -0.00725    0.03000   0.00140
 2417:  65 20 45  0 64 20 44  0              247502.69600  247502.71850   -0.02250    0.03000   0.00135
 2418:  64 13 52  0 63 13 51  0              247516.28100  247516.27731    0.00369    0.01500   0.00170
 2419:  62 10 52  0 61 10 51  0              247524.44100  247524.44819   -0.00719    0.01500   0.00180
 2420:  65 19 46  0 64 19 45  0              247798.35500  247798.33939    0.01561    0.03000   0.00133
 2421:  64 13 51  0 63 13 50  0              247986.54500  247986.55644   -0.01144    0.01500   0.00197
 2422:  64 11 54  0 63 11 53  0              248079.24200  248079.26408   -0.02208    0.01500   0.00154
 2423:  65 18 48  0 64 18 47  0              248150.27700  248150.28980   -0.01280    0.03000   0.00134  248150.29213   -0.01513 0.5000
 2424:  65 18 47  0 64 18 46  0              248150.27700  248150.29445   -0.01745    0.03000   0.00134  248150.29213   -0.01513 0.5000
 2425:  74  1 74  0 73  1 73  0              248509.73600  248509.73851   -0.00251    0.01500   0.00378  248509.73851   -0.00251 0.2500
 2426:  74  0 74  0 73  0 73  0              248509.73600  248509.73851   -0.00251    0.01500   0.00378  248509.73851   -0.00251 0.2500
 2427:  74  1 74  0 73  0 73  0              248509.73600  248509.73851   -0.00251    0.01500   0.00378  248509.73851   -0.00251 0.2500
 2428:  74  0 74  0 73  1 73  0              248509.73600  248509.73851   -0.00251    0.01500   0.00378  248509.73851   -0.00251 0.2500
 2429:  73  1 72  0 72  1 71  0              248510.62300  248510.61752    0.00548    0.01500   0.00301  248510.61752    0.00548 0.2500
 2430:  73  2 72  0 72  2 71  0              248510.62300  248510.61752    0.00548    0.01500   0.00301  248510.61752    0.00548 0.2500
 2431:  73  1 72  0 72  2 71  0              248510.62300  248510.61752    0.00548    0.01500   0.00301  248510.61752    0.00548 0.2500
 2432:  73  2 72  0 72  1 71  0              248510.62300  248510.61752    0.00548    0.01500   0.00301  248510.61752    0.00548 0.2500
 2433:  72  2 70  0 71  2 69  0              248517.52300  248517.49926    0.02374    0.01500   0.00244  248517.49925    0.02375 0.2500
 2434:  72  3 70  0 71  3 69  0              248517.52300  248517.49925    0.02375    0.01500   0.00244  248517.49925    0.02375 0.2500
 2435:  72  2 70  0 71  3 69  0              248517.52300  248517.49925    0.02375    0.01500   0.00244  248517.49925    0.02375 0.2500
 2436:  72  3 70  0 71  2 69  0              248517.52300  248517.49926    0.02374    0.01500   0.00244  248517.49925    0.02375 0.2500
 2437:  71  4 68  0 70  4 67  0              248537.30500  248537.34190   -0.03690    0.03000   0.00208  248537.34193   -0.03693 0.2500
 2438:  71  3 68  0 70  3 67  0              248537.30500  248537.34195   -0.03695    0.03000   0.00208  248537.34193   -0.03693 0.2500
 2439:  71  3 68  0 70  4 67  0              248537.30500  248537.34181   -0.03681    0.03000   0.00208  248537.34193   -0.03693 0.2500
 2440:  71  4 68  0 70  3 67  0              248537.30500  248537.34204   -0.03704    0.03000   0.00208  248537.34193   -0.03693 0.2500
 2441:  65 17 49  0 64 17 48  0              248575.96600  248575.95854    0.00746    0.03000   0.00138  248575.99396   -0.02796 0.5000
 2442:  65 17 48  0 64 17 47  0              248575.96600  248576.02938   -0.06338    0.03000   0.00138  248575.99396   -0.02796 0.5000
 2443:  70  5 66  0 69  5 65  0              248580.98300  248580.96466    0.01834    0.01500   0.00188  248580.96585    0.01715 0.2500
 2444:  70  4 66  0 69  4 65  0              248580.98300  248580.96704    0.01596    0.01500   0.00188  248580.96585    0.01715 0.2500
 2445:  70  4 66  0 69  5 65  0              248580.98300  248580.96031    0.02269    0.01500   0.00188  248580.96585    0.01715 0.2500
 2446:  70  5 66  0 69  4 65  0              248580.98300  248580.97139    0.01161    0.01500   0.00188  248580.96585    0.01715 0.2500
 2447:  69  6 64  0 68  6 63  0              248665.99400  248665.93239    0.06161    0.01500   0.00180  248665.97090    0.02310 0.2500
 2448:  69  5 64  0 68  5 63  0              248665.99400  248666.00940   -0.01540    0.01500   0.00180  248665.97090    0.02310 0.2500
 2449:  69  5 64  0 68  6 63  0              248665.99400  248665.78245    0.21155    0.01500   0.00180  248665.97090    0.02310 0.2500
 2450:  69  6 64  0 68  5 63  0              248665.99400  248666.15934   -0.16534    0.01500   0.00180  248665.97090    0.02310 0.2500
 2451:  68  7 62  0 67  7 61  0              248822.08000  248822.08481   -0.00481    0.01500   0.00177
 2452:  68  6 62  0 67  6 61  0              248823.89000  248823.89255   -0.00255    0.01500   0.00177
 2453:  65 16 50  0 64 16 49  0              249101.03000  249101.02378    0.00622    0.03000   0.00145
 2454:  65 16 49  0 64 16 48  0              249101.91700  249101.94970   -0.03270    0.03000   0.00145
 2455:  67  7 60  0 66  7 59  0              249126.87600  249126.85915    0.01685    0.01500   0.00176
 2456:  86 32 54  0 85 32 53  0              326114.40800  326114.37065    0.03735    0.06000   0.01052
 2457:  85 20 66  0 84 20 65  0              326122.48100  326122.40016    0.08084    0.06000   0.00886
 2458:  85 20 65  0 84 20 64  0              326122.91200  326122.78748    0.12452    0.06000   0.00886
 2459:  84 16 69  0 83 16 68  0              326133.96000  326133.97471   -0.01471    0.06000   0.00902
 2460:  87 10 77  0 86 10 76  0              326169.39800  326169.39834   -0.00034    0.06000   0.00992
 2461:  86 31 55  0 85 31 54  0              326274.24300  326274.21888    0.02412    0.06000   0.01029
 2462:  84 14 71  0 83 14 70  0              326279.69200  326279.69235   -0.00035    0.06000   0.00840
 2463:  86 30 56  0 85 30 55  0              326450.23400  326450.18328    0.05072    0.06000   0.01008
 2464:  86 11 75  0 85 11 74  0              327022.53400  327022.62345   -0.08945    0.06000   0.00933
 2465:  84 16 68  0 83 16 67  0              327250.49200  327250.54852   -0.05652    0.06000   0.01006
 2466:  90  9 82  0 89  9 81  0              328793.99500  328793.96847    0.02653    0.06000   0.01207  328794.00453   -0.00953 0.2500
 2467:  90  8 82  0 89  8 81  0              328793.99500  328794.04058   -0.04558    0.06000   0.01207  328794.00453   -0.00953 0.2500
 2468:  90  8 82  0 89  9 81  0              328793.99500  328793.81976    0.17524    0.06000   0.01207  328794.00453   -0.00953 0.2500
 2469:  90  9 82  0 89  8 81  0              328793.99500  328794.18929   -0.19429    0.06000   0.01207  328794.00453   -0.00953 0.2500
 2470:  86 22 65  0 85 22 64  0              328902.34100  328902.35595   -0.01495    0.06000   0.00942  328902.35793   -0.01693 0.5000
 2471:  86 22 64  0 85 22 63  0              328902.34100  328902.35991   -0.01891    0.06000   0.00942  328902.35793   -0.01693 0.5000
 2472:  85 17 69  0 84 17 68  0              329010.78400  329010.73239    0.05161    0.06000   0.00957
 2473:  89 10 80  0 88 10 79  0              329039.77600  329039.82181   -0.04581    0.06000   0.01137
 2474:  89  9 80  0 88  9 79  0              329041.20100  329041.18461    0.01639    0.06000   0.01137
 2475:  87 38 49  0 86 38 48  0              329209.56100  329209.57091   -0.00991    0.06000   0.01310
 2476:  85 17 68  0 84 17 67  0              329269.58500  329269.58383    0.00117    0.06000   0.00982
 2477:  87 37 50  0 86 37 49  0              329310.07700  329310.06823    0.00877    0.06000   0.01274
 2478:  85 12 73  0 84 12 72  0              329325.57000  329325.54875    0.02125    0.06000   0.00890
 2479:  88 11 78  0 87 11 77  0              329426.27000  329426.32276   -0.05276    0.06000   0.01071
 2480:  88 10 78  0 87 10 77  0              329446.42200  329446.40803    0.01397    0.06000   0.01070
 2481:  86 21 66  0 85 21 65  0              329453.76000  329453.82470   -0.06470    0.06000   0.00950  329453.85059   -0.09059 0.5000
 2482:  86 21 65  0 85 21 64  0              329453.76000  329453.87648   -0.11648    0.06000   0.00950  329453.85059   -0.09059 0.5000
 2483:  87 34 53  0 86 34 52  0              329662.51100  329662.43779    0.07321    0.06000   0.01180
 2484:  87 33 54  0 86 33 53  0              329800.59600  329800.63646   -0.04046    0.06000   0.01152
 2485:  85 14 72  0 84 14 71  0              329919.13400  329919.17705   -0.04305    0.06000   0.00902
 2486:  87 12 76  0 86 12 75  0              329994.45000  329994.44794    0.00206    0.06000   0.01007
 2487:  86 20 67  0 85 20 66  0              330113.99600  330113.88612    0.10988    0.06000   0.00963
 2488:  86 20 66  0 85 20 65  0              330114.58500  330114.48240    0.10260    0.06000   0.00963
 2489:  27  3 24  1 28  3 25  0              1014.2376500  1014.2372119  0.0004381 -0.0004000 0.0000571
 2490:  28  2 26  1 29  2 27  0              1014.2679700  1014.2669875  0.0009825 -0.0004000 0.0000641  1014.2673873  0.0005827 0.2000
 2491:  30  0 30  1 31  0 31  0              1014.2679700  1014.2674864  0.0004836 -0.0004000 0.0000641  1014.2673873  0.0005827 0.2000
 2492:  30  0 30  1 31  1 31  0              1014.2679700  1014.2674837  0.0004863 -0.0004000 0.0000641  1014.2673873  0.0005827 0.2000
 2493:  30  1 30  1 31  0 31  0              1014.2679700  1014.2674908  0.0004792 -0.0004000 0.0000641  1014.2673873  0.0005827 0.2000
 2494:  30  1 30  1 31  1 31  0              1014.2679700  1014.2674881  0.0004819 -0.0004000 0.0000641  1014.2673873  0.0005827 0.2000
 2495:  24  5 20  1 25  5 21  0              1014.5872600  1014.5870413  0.0002187 -0.0004000 0.0000401  1014.5868538  0.0004062 0.5000
 2496:  24  6 19  1 25  6 20  0              1014.5872600  1014.5866662  0.0005938 -0.0004000 0.0000401  1014.5868538  0.0004062 0.5000
 2497:  12  3 10  1 13  4  9  0              1014.6442700  1014.6435554  0.0007146 -0.0004000 0.0000200
 2498:  23  3 20  1 24  3 21  0              1014.6633200  1014.6628847  0.0004353 -0.0004000 0.0000565
 2499:  26  0 26  1 27  0 27  0              1014.7113100  1014.7113546 -0.0000446 -0.0004000 0.0000664  1014.7113599 -0.0000499 0.5000
 2500:  26  1 26  1 27  1 27  0              1014.7113100  1014.7113653 -0.0000553 -0.0004000 0.0000664  1014.7113599 -0.0000499 0.5000
 2501:  21  4 17  1 22  4 18  0              1014.8702100  1014.8701045  0.0001055 -0.0004000 0.0000354  1014.8698868  0.0003232 0.3333
 2502:  22  8 14  1 23  8 15  0              1014.8702100  1014.8697664  0.0004436 -0.0004000 0.0000354  1014.8698868  0.0003232 0.3333
 2503:  22  8 15  1 23  8 16  0              1014.8702100  1014.8697893  0.0004207 -0.0004000 0.0000354  1014.8698868  0.0003232 0.3333
 2504:  21  4 18  1 22  4 19  0              1014.9891100  1014.9885541  0.0005559 -0.0004000 0.0000329  1014.9884551  0.0006549 0.3333
 2505:  21  7 14  1 22  7 15  0              1014.9891100  1014.9882770  0.0008330 -0.0004000 0.0000329  1014.9884551  0.0006549 0.3333
 2506:  21  7 15  1 22  7 16  0              1014.9891100  1014.9885342  0.0005758 -0.0004000 0.0000329  1014.9884551  0.0006549 0.3333
 2507:  19  2 17  1 20  2 18  0              1015.2361900  1015.2363733 -0.0001833 -0.0004000 0.0000293  1015.2362112 -0.0000212 0.5000
 2508:  19  6 14  1 20  6 15  0              1015.2361900  1015.2360490  0.0001410 -0.0004000 0.0000293  1015.2362112 -0.0000212 0.5000
 2509:  20  1 19  1 21  2 20  0              1015.2552400  1015.2542014  0.0010386 -0.0004000 0.0000367
 2510:  21  1 21  1 22  0 22  0              1015.2676300  1015.2667132  0.0009168 -0.0004000 0.0000522  1015.2666221  0.0010079 0.5000
 2511:  21  1 21  1 22  1 22  0              1015.2676300  1015.2665310  0.0010990 -0.0004000 0.0000522  1015.2666221  0.0010079 0.5000
 2512:  14  2 12  1 15  3 13  0              1015.3110800  1015.3109445  0.0001355 -0.0004000 0.0000279
 2513:  18  6 13  1 19  6 14  0              1015.3660300  1015.3652340  0.0007960 -0.0004000 0.0000305
 2514:  17  6 11  1 18  6 12  0              1015.4946900  1015.4936644  0.0010256 -0.0004000 0.0000304  1015.4938830  0.0008070 0.5000
 2515:  17  6 12  1 18  6 13  0              1015.4946900  1015.4941016  0.0005884 -0.0004000 0.0000304  1015.4938830  0.0008070 0.5000
 2516:  17  5 13  1 17  6 12  0              1015.5163200  1015.5160847  0.0002353 -0.0004000 0.0000260
 2517:  18  1 18  1 19  0 19  0              1015.6005500  1015.6005685 -0.0000185 -0.0004000 0.0000420  1015.6002167  0.0003333 0.5000
 2518:  18  1 18  1 19  1 19  0              1015.6005500  1015.5998648  0.0006852 -0.0004000 0.0000420  1015.6002167  0.0003333 0.5000
 2519:  16  6 11  1 17  6 12  0              1015.6237300  1015.6226473  0.0010827 -0.0004000 0.0000306
 2520:  16  3 14  1 17  3 15  0              1015.6413500  1015.6409716  0.0003784 -0.0004000 0.0000406  1015.6407516  0.0005984 0.3333
 2521:  16  9  7  1 17  9  8  0              1015.6413500  1015.6406416  0.0007084 -0.0004000 0.0000406  1015.6407516  0.0005984 0.3333
 2522:  16  9  8  1 17  9  9  0              1015.6413500  1015.6406416  0.0007084 -0.0004000 0.0000406  1015.6407516  0.0005984 0.3333
 2523:  17  0 17  1 18  0 18  0              1015.7113300  1015.7104476  0.0008824 -0.0004000 0.0000386  1015.7107472  0.0005828 0.5000
 2524:  17  1 17  1 18  1 18  0              1015.7113300  1015.7110467  0.0002833 -0.0004000 0.0000386  1015.7107472  0.0005828 0.5000
 2525:  15  4 12  1 16  4 13  0              1015.7396400  1015.7387881  0.0008519 -0.0004000 0.0000224
 2526:  15  6 10  1 16  6 11  0              1015.7519100  1015.7508763  0.0010337 -0.0004000 0.0000311
 2527:  15  3 13  1 16  3 14  0              1015.7619800  1015.7613882  0.0005918 -0.0004000 0.0000357  1015.7620774 -0.0000974 0.3333
 2528:  15  8  7  1 16  8  8  0              1015.7619800  1015.7624219 -0.0004419 -0.0004000 0.0000357  1015.7620774 -0.0000974 0.3333
 2529:  15  8  8  1 16  8  9  0              1015.7619800  1015.7624220 -0.0004420 -0.0004000 0.0000357  1015.7620774 -0.0000974 0.3333
 2530:  14  3 11  1 15  3 12  0              1015.7995200  1015.7992668  0.0002532 -0.0004000 0.0000256
 2531:  16  0 16  1 17  0 17  0              1015.8222000  1015.8213734  0.0008266 -0.0004000 0.0000354  1015.8218293  0.0003707 0.5000
 2532:  16  1 16  1 17  1 17  0              1015.8222000  1015.8222852 -0.0000852 -0.0004000 0.0000354  1015.8218293  0.0003707 0.5000
 2533:  15  2 14  1 16  2 15  0              1015.8317200  1015.8315374  0.0001826 -0.0004000 0.0000252
 2534:  14  4 10  1 15  4 11  0              1015.8496800  1015.8494622  0.0002178 -0.0004000 0.0000216
 2535:  14  4 11  1 15  4 12  0              1015.8668700  1015.8665049  0.0003651 -0.0004000 0.0000214
 2536:  14  6  8  1 15  6  9  0              1015.8797100  1015.8787445  0.0009655 -0.0004000 0.0000319  1015.8787727  0.0009373 0.5000
 2537:  14  6  9  1 15  6 10  0              1015.8797100  1015.8788009  0.0009091 -0.0004000 0.0000319  1015.8787727  0.0009373 0.5000
 2538:  14  3 12  1 15  3 13  0              1015.8832000  1015.8830009  0.0001991 -0.0004000 0.0000217
 2539:  16  4 13  1 16  5 12  0              1015.9267000  1015.9264172  0.0002828 -0.0004000 0.0000258  1015.9264767  0.0002233 0.5000
 2540:  18  4 15  1 18  5 14  0              1015.9267000  1015.9265363  0.0001637 -0.0004000 0.0000258  1015.9264767  0.0002233 0.5000
 2541:  13  2 11  1 14  2 12  0              1015.9296900  1015.9295580  0.0001320 -0.0004000 0.0000246  1015.9295888  0.0001012 0.5000
 2542:  15  0 15  1 16  1 16  0              1015.9296900  1015.9296196  0.0000704 -0.0004000 0.0000246  1015.9295888  0.0001012 0.5000
 2543:  14  2 13  1 15  2 14  0              1015.9456000  1015.9458303 -0.0002303 -0.0004000 0.0000235
 2544:  13  4  9  1 14  4 10  0              1015.9840600  1015.9836416  0.0004184 -0.0004000 0.0000209
 2545:  13  4 10  1 14  4 11  0              1015.9948100  1015.9945274  0.0002826 -0.0004000 0.0000208
 2546:  13  6  7  1 14  6  8  0              1016.0071100  1016.0064120  0.0006980 -0.0004000 0.0000330  1016.0064248  0.0006852 0.5000
 2547:  13  6  8  1 14  6  9  0              1016.0071100  1016.0064376  0.0006724 -0.0004000 0.0000330  1016.0064248  0.0006852 0.5000
 2548:  12  2 10  1 13  2 11  0              1016.0560200  1016.0563145 -0.0002945 -0.0004000 0.0000245
 2549:  12  3  9  1 13  3 10  0              1016.0776600  1016.0778042 -0.0001442 -0.0004000 0.0000212
 2550:  12  4  9  1 13  4 10  0              1016.1228000  1016.1226875  0.0001125 -0.0004000 0.0000208
 2551:  12  3 10  1 13  3 11  0              1016.1290900  1016.1295473 -0.0004573 -0.0004000 0.0000211  1016.1289617  0.0001283 0.5000
 2552:  12  5  8  1 13  5  9  0              1016.1290900  1016.1283761  0.0007139 -0.0004000 0.0000211  1016.1289617  0.0001283 0.5000
 2553:  12  1 11  1 13  1 12  0              1016.1349000  1016.1353949 -0.0004949 -0.0004000 0.0000252  1016.1346075  0.0002925 0.5000
 2554:  19  3 17  1 19  4 16  0              1016.1349000  1016.1338200  0.0010800 -0.0004000 0.0000252  1016.1346075  0.0002925 0.5000
 2555:  11  2  9  1 12  2 10  0              1016.1860100  1016.1858274  0.0001826 -0.0004000 0.0000232
 2556:  11  3  8  1 12  3  9  0              1016.2167000  1016.2164930  0.0002070 -0.0004000 0.0000220  1016.2168396 -0.0001396 0.5000
 2557:  17  3 15  1 17  4 14  0              1016.2167000  1016.2171862 -0.0004862 -0.0004000 0.0000220  1016.2168396 -0.0001396 0.5000
 2558:  11  8  3  1 12  8  4  0              1016.2683100  1016.2687011 -0.0003911 -0.0004000 0.0000390  1016.2685917 -0.0002817 0.3333
 2559:  11  8  4  1 12  8  5  0              1016.2683100  1016.2687011 -0.0003911 -0.0004000 0.0000390  1016.2685917 -0.0002817 0.3333
 2560:  12  1 12  1 13  1 13  0              1016.2683100  1016.2683729 -0.0000629 -0.0004000 0.0000390  1016.2685917 -0.0002817 0.3333
 2561:  11  2 10  1 12  2 11  0              1016.2943400  1016.2941881  0.0001519 -0.0004000 0.0000208
 2562:  10  2  9  1 11  2 10  0              1016.4126300  1016.4123706  0.0002594 -0.0004000 0.0000207
 2563:  17  4 14  1 18  3 15  0              1016.4276500  1016.4269113  0.0007387 -0.0004000 0.0000259
 2564:  10  0 10  1 11  0 11  0              1016.4846800  1016.4840313  0.0006487 -0.0004000 0.0000212  1016.4844571  0.0002229 0.3333
 2565:  11  2 10  1 12  1 11  0              1016.4846800  1016.4843739  0.0003061 -0.0004000 0.0000212  1016.4844571  0.0002229 0.3333
 2566:  14  3 11  1 14  4 10  0              1016.4846800  1016.4849661 -0.0002861 -0.0004000 0.0000212  1016.4844571  0.0002229 0.3333
 2567:  10  1 10  1 11  1 11  0              1016.4933600  1016.4928005  0.0005595 -0.0004000 0.0000233
 2568:   9  3  7  1 10  3  8  0              1016.5066700  1016.5058611  0.0008089 -0.0004000 0.0000215  1016.5062655  0.0004045 0.5000
 2569:   9  4  6  1 10  4  7  0              1016.5066700  1016.5066699  0.0000001 -0.0004000 0.0000215  1016.5062655  0.0004045 0.5000
 2570:   9  2  8  1 10  2  9  0              1016.5318300  1016.5316321  0.0001979 -0.0004000 0.0000210
 2571:   8  2  6  1  9  2  7  0              1016.5878200  1016.5870848  0.0007352 -0.0004000 0.0000219
 2572:   9  0  9  1 10  0 10  0              1016.5945300  1016.5937632  0.0007668 -0.0004000 0.0000228
 2573:   8  1  7  1  9  1  8  0              1016.6014000  1016.6007946  0.0006054 -0.0004000 0.0000227
 2574:   9  1  9  1 10  1 10  0              1016.6061800  1016.6056224  0.0005576 -0.0004000 0.0000229
 2575:   8  2  7  1  9  2  8  0              1016.6522000  1016.6519538  0.0002462 -0.0004000 0.0000215
 2576:   8  0  8  1  9  0  9  0              1016.7033400  1016.7035395 -0.0001995 -0.0004000 0.0000229
 2577:   8  1  8  1  9  1  9  0              1016.7195100  1016.7189726  0.0005374 -0.0004000 0.0000229
 2578:   7  1  6  1  8  1  7  0              1016.7241800  1016.7244487 -0.0002687 -0.0004000 0.0000227  1016.7238946  0.0002854 0.5000
 2579:   7  2  5  1  8  2  6  0              1016.7241800  1016.7233405  0.0008395 -0.0004000 0.0000227  1016.7238946  0.0002854 0.5000
 2580:   7  3  4  1  8  3  5  0              1016.7543300  1016.7534321  0.0008979 -0.0004000 0.0000224
 2581:   7  2  6  1  8  2  7  0              1016.7741400  1016.7732885  0.0008515 -0.0004000 0.0000221
 2582:   7  1  7  1  8  1  8  0              1016.8334100  1016.8329399  0.0004701 -0.0004000 0.0000231
 2583:   6  1  5  1  7  1  6  0              1016.8507500  1016.8505051  0.0002449 -0.0004000 0.0000236
 2584:   6  2  4  1  7  2  5  0              1016.8599700  1016.8595686  0.0004014 -0.0004000 0.0000229
 2585:  10  2  8  1 10  3  7  0              1016.8840200  1016.8834007  0.0006193 -0.0004000 0.0000223
 2586:   6  4  2  1  7  4  3  0              1016.8891300  1016.8883110  0.0008190 -0.0004000 0.0000237  1016.8884704  0.0006596 0.3333
 2587:   6  4  3  1  7  4  4  0              1016.8891300  1016.8883866  0.0007434 -0.0004000 0.0000237  1016.8884704  0.0006596 0.3333
 2588:   7  1  7  1  8  0  8  0              1016.8891300  1016.8887134  0.0004166 -0.0004000 0.0000237  1016.8884704  0.0006596 0.3333
 2589:   6  2  5  1  7  2  6  0              1016.8958400  1016.8955647  0.0002753 -0.0004000 0.0000229
 2590:   6  0  6  1  7  0  7  0              1016.9253600  1016.9252128  0.0001472 -0.0004000 0.0000238
 2591:   6  1  6  1  7  1  7  0              1016.9478500  1016.9475977  0.0002523 -0.0004000 0.0000227  1016.9477235  0.0001265 0.5000
 2592:  16  2 14  1 16  3 13  0              1016.9478500  1016.9478493  0.0000007 -0.0004000 0.0000227  1016.9477235  0.0001265 0.5000
 2593:   5  1  4  1  6  1  5  0              1016.9790600  1016.9785283  0.0005317 -0.0004000 0.0000229  1016.9788823  0.0001777 0.5000
 2594:  14  2 12  1 14  3 11  0              1016.9790600  1016.9792364 -0.0001764 -0.0004000 0.0000229  1016.9788823  0.0001777 0.5000
 2595:   5  3  3  1  6  3  4  0              1017.0125200  1017.0128650 -0.0003450 -0.0004000 0.0000243
 2596:   6  1  6  1  7  0  7  0              1017.0215700  1017.0224683 -0.0008983 -0.0004000 0.0000236
 2597:   5  0  5  1  6  0  6  0              1017.0385700  1017.0385361  0.0000339 -0.0004000 0.0000244
 2598:   5  1  5  1  6  1  6  0              1017.0633500  1017.0629927  0.0003573 -0.0004000 0.0000242
 2599:   4  1  3  1  5  1  4  0              1017.1080600  1017.1081073 -0.0000473 -0.0004000 0.0000248
 2600:   4  3  1  1  5  3  2  0              1017.1394900  1017.1390383  0.0004517 -0.0004000 0.0000252  1017.1392863  0.0002037 0.5000
 2601:   4  3  2  1  5  3  3  0              1017.1394900  1017.1395343 -0.0000443 -0.0004000 0.0000252  1017.1392863  0.0002037 0.5000
 2602:   4  0  4  1  5  0  5  0              1017.1543800  1017.1543912 -0.0000112 -0.0004000 0.0000250
 2603:   4  1  4  1  5  1  5  0              1017.1796400  1017.1791351  0.0005049 -0.0004000 0.0000248
 2604:   3  2  2  1  4  2  3  0              1017.2667100  1017.2670738 -0.0003638 -0.0004000 0.0000254  1017.2663051  0.0004049 0.3333
 2605:   3  3  0  1  4  3  1  0              1017.2667100  1017.2658496  0.0008604 -0.0004000 0.0000254  1017.2663051  0.0004049 0.3333
 2606:   3  3  1  1  4  3  2  0              1017.2667100  1017.2659919  0.0007181 -0.0004000 0.0000254  1017.2663051  0.0004049 0.3333
 2607:   3  0  3  1  4  0  4  0              1017.2731300  1017.2730381  0.0000919 -0.0004000 0.0000255
 2608:   2  0  2  1  3  0  3  0              1017.3943900  1017.3943158  0.0000742 -0.0004000 0.0000260
 2609:   5  0  5  1  5  1  4  0              1017.4332200  1017.4326877  0.0005323 -0.0004000 0.0000244
 2610:   5  5  0  1  5  5  1  0              1017.7727300  1017.7731922 -0.0004622 -0.0004000 0.0000339  1017.7732704 -0.0005404 0.2500
 2611:   5  5  1  1  5  5  0  0              1017.7727300  1017.7731922 -0.0004622 -0.0004000 0.0000339  1017.7732704 -0.0005404 0.2500
 2612:   6  5  1  1  6  5  2  0              1017.7727300  1017.7733487 -0.0006187 -0.0004000 0.0000339  1017.7732704 -0.0005404 0.2500
 2613:   6  5  2  1  6  5  1  0              1017.7727300  1017.7733484 -0.0006184 -0.0004000 0.0000339  1017.7732704 -0.0005404 0.2500
 2614:   6  6  0  1  6  6  1  0              1017.7749900  1017.7753237 -0.0003337 -0.0004000 0.0000416  1017.7755173 -0.0005273 0.1667
 2615:   6  6  1  1  6  6  0  0              1017.7749900  1017.7753237 -0.0003337 -0.0004000 0.0000416  1017.7755173 -0.0005273 0.1667
 2616:   7  6  1  1  7  6  2  0              1017.7749900  1017.7755082 -0.0005182 -0.0004000 0.0000416  1017.7755173 -0.0005273 0.1667
 2617:   7  6  2  1  7  6  1  0              1017.7749900  1017.7755082 -0.0005182 -0.0004000 0.0000416  1017.7755173 -0.0005273 0.1667
 2618:   8  6  2  1  8  6  3  0              1017.7749900  1017.7757198 -0.0007298 -0.0004000 0.0000416  1017.7755173 -0.0005273 0.1667
 2619:   8  6  3  1  8  6  2  0              1017.7749900  1017.7757198 -0.0007298 -0.0004000 0.0000416  1017.7755173 -0.0005273 0.1667
 2620:   7  7  0  1  7  7  1  0              1017.7775000  1017.7778442 -0.0003442 -0.0004000 0.0000515  1017.7780670 -0.0005670 0.1667
 2621:   7  7  1  1  7  7  0  0              1017.7775000  1017.7778442 -0.0003442 -0.0004000 0.0000515  1017.7780670 -0.0005670 0.1667
 2622:   8  7  1  1  8  7  2  0              1017.7775000  1017.7780578 -0.0005578 -0.0004000 0.0000515  1017.7780670 -0.0005670 0.1667
 2623:   8  7  2  1  8  7  1  0              1017.7775000  1017.7780578 -0.0005578 -0.0004000 0.0000515  1017.7780670 -0.0005670 0.1667
 2624:   9  7  2  1  9  7  3  0              1017.7775000  1017.7782989 -0.0007989 -0.0004000 0.0000515  1017.7780670 -0.0005670 0.1667
 2625:   9  7  3  1  9  7  2  0              1017.7775000  1017.7782989 -0.0007989 -0.0004000 0.0000515  1017.7780670 -0.0005670 0.1667
 2626:   8  8  0  1  8  8  1  0              1017.7804500  1017.7807553 -0.0003053 -0.0004000 0.0000620  1017.7810086 -0.0005586 0.1667
 2627:   8  8  1  1  8  8  0  0              1017.7804500  1017.7807553 -0.0003053 -0.0004000 0.0000620  1017.7810086 -0.0005586 0.1667
 2628:   9  8  1  1  9  8  2  0              1017.7804500  1017.7809993 -0.0005493 -0.0004000 0.0000620  1017.7810086 -0.0005586 0.1667
 2629:   9  8  2  1  9  8  1  0              1017.7804500  1017.7809993 -0.0005493 -0.0004000 0.0000620  1017.7810086 -0.0005586 0.1667
 2630:  10  8  2  1 10  8  3  0              1017.7804500  1017.7812712 -0.0008212 -0.0004000 0.0000620  1017.7810086 -0.0005586 0.1667
 2631:  10  8  3  1 10  8  2  0              1017.7804500  1017.7812712 -0.0008212 -0.0004000 0.0000620  1017.7810086 -0.0005586 0.1667
 2632:   9  9  0  1  9  9  1  0              1017.7838400  1017.7840592 -0.0002192 -0.0004000 0.0000723  1017.7843444 -0.0005044 0.1667
 2633:   9  9  1  1  9  9  0  0              1017.7838400  1017.7840592 -0.0002192 -0.0004000 0.0000723  1017.7843444 -0.0005044 0.1667
 2634:  10  9  1  1 10  9  2  0              1017.7838400  1017.7843350 -0.0004950 -0.0004000 0.0000723  1017.7843444 -0.0005044 0.1667
 2635:  10  9  2  1 10  9  1  0              1017.7838400  1017.7843350 -0.0004950 -0.0004000 0.0000723  1017.7843444 -0.0005044 0.1667
 2636:  11  9  2  1 11  9  3  0              1017.7838400  1017.7846391 -0.0007991 -0.0004000 0.0000723  1017.7843444 -0.0005044 0.1667
 2637:  11  9  3  1 11  9  2  0              1017.7838400  1017.7846391 -0.0007991 -0.0004000 0.0000723  1017.7843444 -0.0005044 0.1667
 2638:  10 10  0  1 10 10  1  0              1017.7877100  1017.7877580 -0.0000480 -0.0004000 0.0000817  1017.7880768 -0.0003668 0.1667
 2639:  10 10  1  1 10 10  0  0              1017.7877100  1017.7877580 -0.0000480 -0.0004000 0.0000817  1017.7880768 -0.0003668 0.1667
 2640:  11 10  1  1 11 10  2  0              1017.7877100  1017.7880671 -0.0003571 -0.0004000 0.0000817  1017.7880768 -0.0003668 0.1667
 2641:  11 10  2  1 11 10  1  0              1017.7877100  1017.7880671 -0.0003571 -0.0004000 0.0000817  1017.7880768 -0.0003668 0.1667
 2642:  12 10  2  1 12 10  3  0              1017.7877100  1017.7884052 -0.0006952 -0.0004000 0.0000817  1017.7880768 -0.0003668 0.1667
 2643:  12 10  3  1 12 10  2  0              1017.7877100  1017.7884052 -0.0006952 -0.0004000 0.0000817  1017.7880768 -0.0003668 0.1667
 2644:  12 11  1  1 12 11  2  0              1017.7918800  1017.7921986 -0.0003186 -0.0004000 0.0000882  1017.7923855 -0.0005055 0.2500
 2645:  12 11  2  1 12 11  1  0              1017.7918800  1017.7921986 -0.0003186 -0.0004000 0.0000882  1017.7923855 -0.0005055 0.2500
 2646:  13 11  2  1 13 11  3  0              1017.7918800  1017.7925723 -0.0006923 -0.0004000 0.0000882  1017.7923855 -0.0005055 0.2500
 2647:  13 11  3  1 13 11  2  0              1017.7918800  1017.7925723 -0.0006923 -0.0004000 0.0000882  1017.7923855 -0.0005055 0.2500
 2648:  12 12  0  1 12 12  1  0              1017.7967200  1017.7963512  0.0003688 -0.0004000 0.0000991  1017.7965417  0.0001783 0.2500
 2649:  12 12  1  1 12 12  0  0              1017.7967200  1017.7963512  0.0003688 -0.0004000 0.0000991  1017.7965417  0.0001783 0.2500
 2650:  13 12  1  1 13 12  2  0              1017.7967200  1017.7967323 -0.0000123 -0.0004000 0.0000991  1017.7965417  0.0001783 0.2500
 2651:  13 12  2  1 13 12  1  0              1017.7967200  1017.7967323 -0.0000123 -0.0004000 0.0000991  1017.7965417  0.0001783 0.2500
 2652:  14 13  1  1 14 13  2  0              1017.8014400  1017.8016715 -0.0002315 -0.0004000 0.0001020  1017.8018971 -0.0004571 0.2500
 2653:  14 13  2  1 14 13  1  0              1017.8014400  1017.8016715 -0.0002315 -0.0004000 0.0001020  1017.8018971 -0.0004571 0.2500
 2654:  15 13  2  1 15 13  3  0              1017.8014400  1017.8021227 -0.0006827 -0.0004000 0.0001020  1017.8018971 -0.0004571 0.2500
 2655:  15 13  3  1 15 13  2  0              1017.8014400  1017.8021227 -0.0006827 -0.0004000 0.0001020  1017.8018971 -0.0004571 0.2500
 2656:  15 14  1  1 15 14  2  0              1017.8075900  1017.8070197  0.0005703 -0.0004000 0.0001094  1017.8075237  0.0000663 0.1667
 2657:  15 14  2  1 15 14  1  0              1017.8075900  1017.8070197  0.0005703 -0.0004000 0.0001094  1017.8075237  0.0000663 0.1667
 2658:  16 14  2  1 16 14  3  0              1017.8075900  1017.8075130  0.0000770 -0.0004000 0.0001094  1017.8075237  0.0000663 0.1667
 2659:  16 14  3  1 16 14  2  0              1017.8075900  1017.8075130  0.0000770 -0.0004000 0.0001094  1017.8075237  0.0000663 0.1667
 2660:  17 14  3  1 17 14  4  0              1017.8075900  1017.8080383 -0.0004483 -0.0004000 0.0001094  1017.8075237  0.0000663 0.1667
 2661:  17 14  4  1 17 14  3  0              1017.8075900  1017.8080383 -0.0004483 -0.0004000 0.0001094  1017.8075237  0.0000663 0.1667
 2662:  17 15  2  1 17 15  3  0              1017.8138600  1017.8133185  0.0005415 -0.0004000 0.0001217  1017.8139003 -0.0000403 0.1667
 2663:  17 15  3  1 17 15  2  0              1017.8138600  1017.8133185  0.0005415 -0.0004000 0.0001217  1017.8139003 -0.0000403 0.1667
 2664:  18 15  3  1 18 15  4  0              1017.8138600  1017.8138892 -0.0000292 -0.0004000 0.0001217  1017.8139003 -0.0000403 0.1667
 2665:  18 15  4  1 18 15  3  0              1017.8138600  1017.8138892 -0.0000292 -0.0004000 0.0001217  1017.8139003 -0.0000403 0.1667
 2666:  19 15  4  1 19 15  5  0              1017.8138600  1017.8144931 -0.0006331 -0.0004000 0.0001217  1017.8139003 -0.0000403 0.1667
 2667:  19 15  5  1 19 15  4  0              1017.8138600  1017.8144931 -0.0006331 -0.0004000 0.0001217  1017.8139003 -0.0000403 0.1667
 2668:  19 16  3  1 19 16  4  0              1017.8205300  1017.8201623  0.0003677 -0.0004000 0.0001512  1017.8204888  0.0000412 0.2500
 2669:  19 16  4  1 19 16  3  0              1017.8205300  1017.8201623  0.0003677 -0.0004000 0.0001512  1017.8204888  0.0000412 0.2500
 2670:  20 16  4  1 20 16  5  0              1017.8205300  1017.8208152 -0.0002852 -0.0004000 0.0001512  1017.8204888  0.0000412 0.2500
 2671:  20 16  5  1 20 16  4  0              1017.8205300  1017.8208152 -0.0002852 -0.0004000 0.0001512  1017.8204888  0.0000412 0.2500
 2672:  21 17  4  1 21 17  5  0              1017.8276800  1017.8275671  0.0001129 -0.0004000 0.0001995  1017.8275671  0.0001129 0.5000
 2673:  21 17  5  1 21 17  4  0              1017.8276800  1017.8275671  0.0001129 -0.0004000 0.0001995  1017.8275671  0.0001129 0.5000
 2674:  22 18  4  1 22 18  5  0              1017.8351200  1017.8347537  0.0003663 -0.0004000 0.0002700  1017.8347537  0.0003663 0.5000
 2675:  22 18  5  1 22 18  4  0              1017.8351200  1017.8347537  0.0003663 -0.0004000 0.0002700  1017.8347537  0.0003663 0.5000
 2676:   2  1  2  1  1  1  1  0              1018.0054700  1018.0055620 -0.0000920 -0.0004000 0.0000257
 2677:   3  0  3  1  2  0  2  0              1018.1428600  1018.1425501  0.0003099 -0.0004000 0.0000255
 2678:   3  2  2  1  2  2  1  0              1018.1462600  1018.1462112  0.0000488 -0.0004000 0.0000221  1018.1463744 -0.0001144 0.5000
 2679:  11  2  9  1 11  2 10  0              1018.1462600  1018.1465376 -0.0002776 -0.0004000 0.0000221  1018.1463744 -0.0001144 0.5000
 2680:   3  2  1  1  2  2  0  0              1018.1495100  1018.1491546  0.0003554 -0.0004000 0.0000250
 2681:   3  1  2  1  2  1  1  0              1018.1670300  1018.1667555  0.0002745 -0.0004000 0.0000253
 2682:   4  1  4  1  3  1  3  0              1018.2411700  1018.2412771 -0.0001071 -0.0004000 0.0000248
 2683:   4  0  4  1  3  0  3  0              1018.2639800  1018.2639876 -0.0000076 -0.0004000 0.0000250
 2684:   4  2  3  1  3  2  2  0              1018.2714800  1018.2714090  0.0000710 -0.0004000 0.0000244
 2685:   4  3  1  1  3  3  0  0              1018.2745300  1018.2744334  0.0000966 -0.0004000 0.0000252  1018.2743621  0.0001679 0.5000
 2686:   4  3  2  1  3  3  1  0              1018.2745300  1018.2742908  0.0002392 -0.0004000 0.0000252  1018.2743621  0.0001679 0.5000
 2687:   4  2  2  1  3  2  1  0              1018.2787700  1018.2786866  0.0000834 -0.0004000 0.0000244
 2688:   4  1  3  1  3  1  2  0              1018.2984700  1018.2986523 -0.0001823 -0.0004000 0.0000248
 2689:   5  1  5  1  4  1  4  0              1018.3578700  1018.3582788 -0.0004088 -0.0004000 0.0000242
 2690:   5  0  5  1  4  0  4  0              1018.3827300  1018.3828281 -0.0000981 -0.0004000 0.0000224  1018.3831012 -0.0003712 0.5000
 2691:  11  2  9  1 11  1 10  0              1018.3827300  1018.3833743 -0.0006443 -0.0004000 0.0000224  1018.3831012 -0.0003712 0.5000
 2692:   5  2  4  1  4  2  3  0              1018.3957900  1018.3961391 -0.0003491 -0.0004000 0.0000237
 2693:   5  3  2  1  4  3  1  0              1018.4012100  1018.4014777 -0.0002677 -0.0004000 0.0000257  1018.4014048 -0.0001948 0.2500
 2694:   5  3  3  1  4  3  2  0              1018.4012100  1018.4009802  0.0002298 -0.0004000 0.0000257  1018.4014048 -0.0001948 0.2500
 2695:   5  4  1  1  4  4  0  0              1018.4012100  1018.4015832 -0.0003732 -0.0004000 0.0000257  1018.4014048 -0.0001948 0.2500
 2696:   5  4  2  1  4  4  1  0              1018.4012100  1018.4015781 -0.0003681 -0.0004000 0.0000257  1018.4014048 -0.0001948 0.2500
 2697:   5  2  3  1  4  2  2  0              1018.4098000  1018.4103686 -0.0005686 -0.0004000 0.0000237
 2698:   5  1  4  1  4  1  3  0              1018.4293200  1018.4297195 -0.0003995 -0.0004000 0.0000242
 2699:   9  1  8  1  9  0  9  0              1018.4337000  1018.4345277 -0.0008277 -0.0004000 0.0000224
 2700:   6  1  6  1  5  1  5  0              1018.4740900  1018.4745931 -0.0005031 -0.0004000 0.0000236
 2701:   6  0  6  1  5  0  5  0              1018.4983600  1018.4989038 -0.0005438 -0.0004000 0.0000238
 2702:   6  2  5  1  5  2  4  0              1018.5200700  1018.5202816 -0.0002116 -0.0004000 0.0000229
 2703:   6  3  3  1  5  3  2  0              1018.5286200  1018.5292529 -0.0006329 -0.0004000 0.0000289  1018.5292349 -0.0006149 0.3333
 2704:   6  5  1  1  5  5  0  0              1018.5286200  1018.5292260 -0.0006060 -0.0004000 0.0000289  1018.5292349 -0.0006149 0.3333
 2705:   6  5  2  1  5  5  1  0              1018.5286200  1018.5292258 -0.0006058 -0.0004000 0.0000289  1018.5292349 -0.0006149 0.3333
 2706:   6  2  4  1  5  2  3  0              1018.5438300  1018.5442388 -0.0004088 -0.0004000 0.0000229
 2707:   6  1  5  1  5  1  4  0              1018.5592700  1018.5596496 -0.0003796 -0.0004000 0.0000236
 2708:  14  3 11  1 14  2 12  0              1018.5656400  1018.5661095 -0.0004695 -0.0004000 0.0000256
 2709:  13  3 10  1 13  2 11  0              1018.5734300  1018.5738347 -0.0004047 -0.0004000 0.0000257  1018.5738773 -0.0004473 0.5000
 2710:  15  3 12  1 15  2 13  0              1018.5734300  1018.5739199 -0.0004899 -0.0004000 0.0000257  1018.5738773 -0.0004473 0.5000
 2711:   7  1  7  1  6  1  6  0              1018.5898100  1018.5901862 -0.0003762 -0.0004000 0.0000231
 2712:   7  0  7  1  6  0  6  0              1018.6119200  1018.6124682 -0.0005482 -0.0004000 0.0000232
 2713:  11  3  8  1 11  2  9  0              1018.6230600  1018.6238483 -0.0007883 -0.0004000 0.0000230  1018.6235911 -0.0005311 0.5000
 2714:  14  2 12  1 14  1 13  0              1018.6230600  1018.6233339 -0.0002739 -0.0004000 0.0000230  1018.6235911 -0.0005311 0.5000
 2715:   7  2  6  1  6  2  5  0              1018.6435100  1018.6437216 -0.0002116 -0.0004000 0.0000221
 2716:   7  3  5  1  6  3  4  0              1018.6553100  1018.6550946  0.0002154 -0.0004000 0.0000267  1018.6554807 -0.0001707 0.2000
 2717:   7  4  3  1  6  4  2  0              1018.6553100  1018.6553386 -0.0000286 -0.0004000 0.0000267  1018.6554807 -0.0001707 0.2000
 2718:   7  4  4  1  6  4  3  0              1018.6553100  1018.6552627  0.0000473 -0.0004000 0.0000267  1018.6554807 -0.0001707 0.2000
 2719:   7  5  2  1  6  5  1  0              1018.6553100  1018.6558544 -0.0005444 -0.0004000 0.0000267  1018.6554807 -0.0001707 0.2000
 2720:   7  5  3  1  6  5  2  0              1018.6553100  1018.6558535 -0.0005435 -0.0004000 0.0000267  1018.6554807 -0.0001707 0.2000
 2721:   7  3  4  1  6  3  3  0              1018.6578600  1018.6580286 -0.0001686 -0.0004000 0.0000224
 2722:   7  2  5  1  6  2  4  0              1018.6794500  1018.6799068 -0.0004568 -0.0004000 0.0000223
 2723:   7  1  6  1  6  1  5  0              1018.6874200  1018.6880790 -0.0006590 -0.0004000 0.0000231
 2724:   8  1  8  1  7  1  7  0              1018.7045700  1018.7050666 -0.0004966 -0.0004000 0.0000229
 2725:   8  0  8  1  7  0  7  0              1018.7236200  1018.7241369 -0.0005169 -0.0004000 0.0000229
 2726:   8  2  7  1  7  2  6  0              1018.7665600  1018.7663531  0.0002069 -0.0004000 0.0000215
 2727:   8  4  4  1  7  4  3  0              1018.7830200  1018.7828039  0.0002161 -0.0004000 0.0000242
 2728:   8  3  5  1  7  3  4  0              1018.7881500  1018.7881263  0.0000237 -0.0004000 0.0000214
 2729:   8  1  7  1  7  1  6  0              1018.8141200  1018.8145918 -0.0004718 -0.0004000 0.0000227
 2730:   8  2  6  1  7  2  5  0              1018.8161700  1018.8166073 -0.0004373 -0.0004000 0.0000219
 2731:   9  1  9  1  8  1  8  0              1018.8189700  1018.8192794 -0.0003094 -0.0004000 0.0000229
 2732:   9  2  8  1  8  2  7  0              1018.8880800  1018.8880831 -0.0000031 -0.0004000 0.0000210
 2733:   9  4  5  1  8  4  4  0              1018.9106300  1018.9107802 -0.0001502 -0.0004000 0.0000298  1018.9105991  0.0000309 0.2500
 2734:   9  4  6  1  8  4  5  0              1018.9106300  1018.9102854  0.0003446 -0.0004000 0.0000298  1018.9105991  0.0000309 0.2500
 2735:   9  6  3  1  8  6  2  0              1018.9106300  1018.9106654 -0.0000354 -0.0004000 0.0000298  1018.9105991  0.0000309 0.2500
 2736:   9  6  4  1  8  6  3  0              1018.9106300  1018.9106653 -0.0000353 -0.0004000 0.0000298  1018.9105991  0.0000309 0.2500
 2737:   9  3  6  1  8  3  5  0              1018.9202000  1018.9198916  0.0003084 -0.0004000 0.0000207
 2738:  10  1 10  1  9  1  9  0              1018.9326600  1018.9328966 -0.0002366 -0.0004000 0.0000233
 2739:   9  1  8  1  8  1  7  0              1018.9383400  1018.9387459 -0.0004059 -0.0004000 0.0000224
 2740:  10  0 10  1  9  0  9  0              1018.9444700  1018.9447306 -0.0002606 -0.0004000 0.0000232
 2741:   9  2  7  1  8  2  6  0              1018.9533200  1018.9534110 -0.0000910 -0.0004000 0.0000219
 2742:  10  2  9  1  9  2  8  0              1019.0089600  1019.0088376  0.0001224 -0.0004000 0.0000207
 2743:  10  4  7  1  9  4  6  0              1019.0388200  1019.0383288  0.0004912 -0.0004000 0.0000379  1019.0388155  0.0000045 0.3333
 2744:  10  7  3  1  9  7  2  0              1019.0388200  1019.0390588 -0.0002388 -0.0004000 0.0000379  1019.0388155  0.0000045 0.3333
 2745:  10  7  4  1  9  7  3  0              1019.0388200  1019.0390588 -0.0002388 -0.0004000 0.0000379  1019.0388155  0.0000045 0.3333
 2746:  11  1 11  1 10  1 10  0              1019.0465500  1019.0460061  0.0005439 -0.0004000 0.0000242
 2747:  10  3  7  1  9  3  6  0              1019.0544700  1019.0536311  0.0008389 -0.0004000 0.0000202
 2748:  10  1  9  1  9  1  8  0              1019.0602900  1019.0601353  0.0001547 -0.0004000 0.0000222
 2749:  10  2  8  1  9  2  7  0              1019.0895600  1019.0894556  0.0001044 -0.0004000 0.0000223
 2750:   5  2  3  1  4  1  4  0              1019.1208500  1019.1207045  0.0001455 -0.0004000 0.0000237
 2751:  11  2 10  1 10  2  9  0              1019.1284000  1019.1285667 -0.0001667 -0.0004000 0.0000208
 2752:  12  1 12  1 11  1 11  0              1019.1591300  1019.1587003  0.0004297 -0.0004000 0.0000256
 2753:  11  4  8  1 10  4  7  0              1019.1662300  1019.1667007 -0.0004707 -0.0004000 0.0000364  1019.1662290  0.0000010 0.3333
 2754:  11  7  4  1 10  7  3  0              1019.1662300  1019.1659932  0.0002368 -0.0004000 0.0000364  1019.1662290  0.0000010 0.3333
 2755:  11  7  5  1 10  7  4  0              1019.1662300  1019.1659932  0.0002368 -0.0004000 0.0000364  1019.1662290  0.0000010 0.3333
 2756:  11  1 10  1 10  1  9  0              1019.1785600  1019.1784935  0.0000665 -0.0004000 0.0000223
 2757:  11  3  8  1 10  3  7  0              1019.1898600  1019.1895072  0.0003528 -0.0004000 0.0000204
 2758:  11  2  9  1 10  2  8  0              1019.2241400  1019.2240634  0.0000766 -0.0004000 0.0000232
 2759:  12  2 11  1 11  2 10  0              1019.2472900  1019.2472493  0.0000407 -0.0004000 0.0000213
 2760:  13  1 13  1 12  1 12  0              1019.2712400  1019.2710677  0.0001723 -0.0004000 0.0000274
 2761:  13  0 13  1 12  0 12  0              1019.2756200  1019.2754739  0.0001461 -0.0004000 0.0000273
 2762:  12  3 10  1 11  3  9  0              1019.2894100  1019.2893670  0.0000430 -0.0004000 0.0000200
 2763:  12  1 11  1 11  1 10  0              1019.2938600  1019.2938142  0.0000458 -0.0004000 0.0000285  1019.2933310  0.0005290 0.2000
 2764:  12  5  7  1 11  5  6  0              1019.2938600  1019.2933814  0.0004786 -0.0004000 0.0000285  1019.2933310  0.0005290 0.2000
 2765:  12  5  8  1 11  5  7  0              1019.2938600  1019.2932099  0.0006501 -0.0004000 0.0000285  1019.2933310  0.0005290 0.2000
 2766:  12  7  5  1 11  7  4  0              1019.2938600  1019.2931249  0.0007351 -0.0004000 0.0000285  1019.2933310  0.0005290 0.2000
 2767:  12  7  6  1 11  7  5  0              1019.2938600  1019.2931249  0.0007351 -0.0004000 0.0000285  1019.2933310  0.0005290 0.2000
 2768:  12  4  8  1 11  4  7  0              1019.2995200  1019.2991946  0.0003254 -0.0004000 0.0000208
 2769:  12  3  9  1 11  3  8  0              1019.3270500  1019.3274141 -0.0003641 -0.0004000 0.0000212
 2770:  10  2  9  1  9  1  8  0              1019.3471900  1019.3471952 -0.0000052 -0.0004000 0.0000281  1019.3475087 -0.0003187 0.5000
 2771:  19  3 16  1 18  4 15  0              1019.3471900  1019.3478223 -0.0006323 -0.0004000 0.0000281  1019.3475087 -0.0003187 0.5000
 2772:  12  2 10  1 11  2  9  0              1019.3570000  1019.3567290  0.0002710 -0.0004000 0.0000245
 2773:  13  2 12  1 12  2 11  0              1019.3648800  1019.3648958 -0.0000158 -0.0004000 0.0000222
 2774:  14  1 14  1 13  1 13  0              1019.3833700  1019.3831872  0.0001828 -0.0004000 0.0000298
 2775:  14  0 14  1 13  0 13  0              1019.3867200  1019.3862192  0.0005008 -0.0004000 0.0000296
 2776:  13  1 12  1 12  1 11  0              1019.4061800  1019.4064311 -0.0002511 -0.0004000 0.0000232
 2777:  13  3 11  1 12  3 10  0              1019.4149200  1019.4147373  0.0001827 -0.0004000 0.0000207
 2778:  13  5  8  1 12  5  7  0              1019.4219100  1019.4220692 -0.0001592 -0.0004000 0.0000381  1019.4218588  0.0000512 0.2500
 2779:  13  5  9  1 12  5  8  0              1019.4219100  1019.4217083  0.0002017 -0.0004000 0.0000381  1019.4218588  0.0000512 0.2500
 2780:  13  8  5  1 12  8  4  0              1019.4219100  1019.4218289  0.0000811 -0.0004000 0.0000381  1019.4218588  0.0000512 0.2500
 2781:  13  8  6  1 12  8  5  0              1019.4219100  1019.4218289  0.0000811 -0.0004000 0.0000381  1019.4218588  0.0000512 0.2500
 2782:  13  9  4  1 12  9  3  0              1019.4237400  1019.4239831 -0.0002431 -0.0004000 0.0000655  1019.4239831 -0.0002431 0.5000
 2783:  13  9  5  1 12  9  4  0              1019.4237400  1019.4239831 -0.0002431 -0.0004000 0.0000655  1019.4239831 -0.0002431 0.5000
 2784:  13 10  3  1 12 10  2  0              1019.4267300  1019.4267631 -0.0000331 -0.0004000 0.0000762  1019.4267631 -0.0000331 0.5000
 2785:  13 10  4  1 12 10  3  0              1019.4267300  1019.4267631 -0.0000331 -0.0004000 0.0000762  1019.4267631 -0.0000331 0.5000
 2786:  13  4  9  1 12  4  8  0              1019.4309000  1019.4308473  0.0000527 -0.0004000 0.0000209
 2787:  13  3 10  1 12  3  9  0              1019.4668400  1019.4668940 -0.0000540 -0.0004000 0.0000230
 2788:  14  2 13  1 13  2 12  0              1019.4812200  1019.4815485 -0.0003285 -0.0004000 0.0000235
 2789:  13  2 11  1 12  2 10  0              1019.4865600  1019.4870488 -0.0004888 -0.0004000 0.0000261
 2790:  15  1 15  1 14  1 14  0              1019.4949600  1019.4951246 -0.0001646 -0.0004000 0.0000324
 2791:  15  0 15  1 14  0 14  0              1019.4971000  1019.4971800 -0.0000800 -0.0004000 0.0000323
 2792:  14  1 13  1 13  1 12  0              1019.5166300  1019.5169857 -0.0003557 -0.0004000 0.0000241
 2793:  14  3 12  1 13  3 11  0              1019.5390000  1019.5392305 -0.0002305 -0.0004000 0.0000217
 2794:  14  6  8  1 13  6  7  0              1019.5490000  1019.5483636  0.0006364 -0.0004000 0.0000416  1019.5487097  0.0002903 0.2500
 2795:  14  6  9  1 13  6  8  0              1019.5490000  1019.5483379  0.0006621 -0.0004000 0.0000416  1019.5487097  0.0002903 0.2500
 2796:  14  8  6  1 13  8  5  0              1019.5490000  1019.5490687 -0.0000687 -0.0004000 0.0000416  1019.5487097  0.0002903 0.2500
 2797:  14  8  7  1 13  8  6  0              1019.5490000  1019.5490687 -0.0000687 -0.0004000 0.0000416  1019.5487097  0.0002903 0.2500
 2798:  14  5 10  1 13  5  9  0              1019.5505300  1019.5505863 -0.0000563 -0.0004000 0.0000485  1019.5508609 -0.0003309 0.3333
 2799:  14  9  5  1 13  9  4  0              1019.5505300  1019.5509983 -0.0004683 -0.0004000 0.0000485  1019.5508609 -0.0003309 0.3333
 2800:  14  9  6  1 13  9  5  0              1019.5505300  1019.5509983 -0.0004683 -0.0004000 0.0000485  1019.5508609 -0.0003309 0.3333
 2801:  14  4 11  1 13  4 10  0              1019.5528800  1019.5530776 -0.0001976 -0.0004000 0.0000519  1019.5534400 -0.0005600 0.3333
 2802:  14 10  4  1 13 10  3  0              1019.5528800  1019.5536212 -0.0007412 -0.0004000 0.0000519  1019.5534400 -0.0005600 0.3333
 2803:  14 10  5  1 13 10  4  0              1019.5528800  1019.5536212 -0.0007412 -0.0004000 0.0000519  1019.5534400 -0.0005600 0.3333
 2804:  14 11  3  1 13 11  2  0              1019.5564100  1019.5568191 -0.0004091 -0.0004000 0.0000831  1019.5568191 -0.0004091 0.5000
 2805:  14 11  4  1 13 11  3  0              1019.5564100  1019.5568191 -0.0004091 -0.0004000 0.0000831  1019.5568191 -0.0004091 0.5000
 2806:  14  4 10  1 13  4  9  0              1019.5639600  1019.5640413 -0.0000813 -0.0004000 0.0000216
 2807:  15  2 14  1 14  2 13  0              1019.5970800  1019.5972781 -0.0001981 -0.0004000 0.0000252
 2808:  16  1 16  1 15  1 15  0              1019.6067300  1019.6069328 -0.0002028 -0.0004000 0.0000354
 2809:  14  2 12  1 13  2 11  0              1019.6141500  1019.6146604 -0.0005104 -0.0004000 0.0000279
 2810:  15  1 14  1 14  1 13  0              1019.6257400  1019.6262695 -0.0005295 -0.0004000 0.0000254
 2811:  15  3 13  1 14  3 12  0              1019.6623400  1019.6627214 -0.0003814 -0.0004000 0.0000231
 2812:  15  6  9  1 14  6  8  0              1019.6771700  1019.6768255  0.0003445 -0.0004000 0.0000311  1019.6767972  0.0003728 0.5000
 2813:  15  6 10  1 14  6  9  0              1019.6771700  1019.6767688  0.0004012 -0.0004000 0.0000311  1019.6767972  0.0003728 0.5000
 2814:  15  5 11  1 14  5 10  0              1019.6799300  1019.6798388  0.0000912 -0.0004000 0.0000528  1019.6803542 -0.0004242 0.3333
 2815:  15 10  5  1 14 10  4  0              1019.6799300  1019.6806119 -0.0006819 -0.0004000 0.0000528  1019.6803542 -0.0004242 0.3333
 2816:  15 10  6  1 14 10  5  0              1019.6799300  1019.6806119 -0.0006819 -0.0004000 0.0000528  1019.6803542 -0.0004242 0.3333
 2817:  15  4 11  1 14  4 10  0              1019.6986100  1019.6990719 -0.0004619 -0.0004000 0.0000231
 2818:  16  2 15  1 15  2 14  0              1019.7116600  1019.7121786 -0.0005186 -0.0004000 0.0000272
 2819:  17  1 17  1 16  1 16  0              1019.7190200  1019.7186522  0.0003678 -0.0004000 0.0000386
 2820:  16  1 15  1 15  1 14  0              1019.7346000  1019.7350216 -0.0004216 -0.0004000 0.0000272
 2821:  15  2 13  1 14  2 12  0              1019.7385600  1019.7392252 -0.0006652 -0.0004000 0.0000298
 2822:  24  5 20  1 24  4 21  0              1019.7462400  1019.7463837 -0.0001437 -0.0004000 0.0000422
 2823:  16  3 14  1 15  3 13  0              1019.7845900  1019.7851150 -0.0005250 -0.0004000 0.0000249
 2824:  16  6 10  1 15  6  9  0              1019.8052900  1019.8056663 -0.0003763 -0.0004000 0.0000435  1019.8055591 -0.0002691 0.2500
 2825:  16  6 11  1 15  6 10  0              1019.8052900  1019.8055483 -0.0002583 -0.0004000 0.0000435  1019.8055591 -0.0002691 0.2500
 2826:  16  9  7  1 15  9  6  0              1019.8052900  1019.8055110 -0.0002210 -0.0004000 0.0000435  1019.8055591 -0.0002691 0.2500
 2827:  16  9  8  1 15  9  7  0              1019.8052900  1019.8055110 -0.0002210 -0.0004000 0.0000435  1019.8055591 -0.0002691 0.2500
 2828:  16  4 13  1 15  4 12  0              1019.8099700  1019.8104699 -0.0004999 -0.0004000 0.0000441  1019.8103077 -0.0003377 0.2500
 2829:  16  5 12  1 15  5 11  0              1019.8099700  1019.8094430  0.0005270 -0.0004000 0.0000441  1019.8103077 -0.0003377 0.2500
 2830:  16 11  5  1 15 11  4  0              1019.8099700  1019.8106590 -0.0006890 -0.0004000 0.0000441  1019.8103077 -0.0003377 0.2500
 2831:  16 11  6  1 15 11  5  0              1019.8099700  1019.8106590 -0.0006890 -0.0004000 0.0000441  1019.8103077 -0.0003377 0.2500
 2832:  17  2 16  1 16  2 15  0              1019.8258900  1019.8263583 -0.0004683 -0.0004000 0.0000294
 2833:  18  1 18  1 17  1 17  0              1019.8303400  1019.8303129  0.0000271 -0.0004000 0.0000420
 2834:  16  4 12  1 15  4 11  0              1019.8356900  1019.8361743 -0.0004843 -0.0004000 0.0000254
 2835:  17  1 16  1 16  1 15  0              1019.8433100  1019.8437857 -0.0004757 -0.0004000 0.0000293
 2836:  16  2 14  1 15  2 13  0              1019.8597000  1019.8604658 -0.0007658 -0.0004000 0.0000316
 2837:  17  3 15  1 16  3 14  0              1019.9058000  1019.9063503 -0.0005503 -0.0004000 0.0000268
 2838:  19  2 17  1 18  3 16  0              1019.9235100  1019.9232353  0.0002747 -0.0004000 0.0000359
 2839:  17  9  8  1 16  9  7  0              1019.9333600  1019.9330282  0.0003318 -0.0004000 0.0000574  1019.9330282  0.0003318 0.5000
 2840:  17  9  9  1 16  9  8  0              1019.9333600  1019.9330282  0.0003318 -0.0004000 0.0000574  1019.9330282  0.0003318 0.5000
 2841:  17  4 14  1 16  4 13  0              1019.9390500  1019.9386122  0.0004378 -0.0004000 0.0000254  1019.9389832  0.0000668 0.5000
 2842:  17  5 13  1 16  5 12  0              1019.9390500  1019.9393542 -0.0003042 -0.0004000 0.0000254  1019.9389832  0.0000668 0.5000
 2843:  19  0 19  1 18  0 18  0              1019.9419500  1019.9423278 -0.0003778 -0.0004000 0.0000454  1019.9421322 -0.0001822 0.5000
 2844:  19  1 19  1 18  1 18  0              1019.9419500  1019.9419366  0.0000134 -0.0004000 0.0000454  1019.9421322 -0.0001822 0.5000
 2845:  18  1 17  1 17  1 16  0              1019.9523300  1019.9528748 -0.0005448 -0.0004000 0.0000316
 2846:  17  4 13  1 16  4 12  0              1019.9751100  1019.9754263 -0.0003163 -0.0004000 0.0000287
 2847:  17  2 15  1 16  2 14  0              1019.9777000  1019.9782499 -0.0005499 -0.0004000 0.0000333
 2848:  19  6 14  1 19  5 15  0              1020.0259900  1020.0259449  0.0000451 -0.0004000 0.0000310
 2849:  18  3 16  1 17  3 15  0              1020.0260100  1020.0264016 -0.0003916 -0.0004000 0.0000288
 2850:  19  2 18  1 18  2 17  0              1020.0535000  1020.0530121  0.0004879 -0.0004000 0.0000434  1020.0534477  0.0000523 0.3333
 2851:  20  0 20  1 19  0 19  0              1020.0535000  1020.0537923 -0.0002923 -0.0004000 0.0000434  1020.0534477  0.0000523 0.3333
 2852:  20  1 20  1 19  1 19  0              1020.0535000  1020.0535387 -0.0000387 -0.0004000 0.0000434  1020.0534477  0.0000523 0.3333
 2853:  18 10  8  1 17 10  7  0              1020.0619300  1020.0624579 -0.0005279 -0.0004000 0.0000642  1020.0624579 -0.0005279 0.5000
 2854:  18 10  9  1 17 10  8  0              1020.0619300  1020.0624579 -0.0005279 -0.0004000 0.0000642  1020.0624579 -0.0005279 0.5000
 2855:  18  6 12  1 17  6 11  0              1020.0651500  1020.0646601  0.0004899 -0.0004000 0.0000550  1020.0648920  0.0002580 0.3333
 2856:  18 11  7  1 17 11  6  0              1020.0651500  1020.0650080  0.0001420 -0.0004000 0.0000550  1020.0648920  0.0002580 0.3333
 2857:  18 11  8  1 17 11  7  0              1020.0651500  1020.0650080  0.0001420 -0.0004000 0.0000550  1020.0648920  0.0002580 0.3333
 2858:  18  5 13  1 17  5 12  0              1020.0761100  1020.0761544 -0.0000444 -0.0004000 0.0000276
 2859:  18  2 16  1 17  2 15  0              1020.0920800  1020.0926915 -0.0006115 -0.0004000 0.0000347
 2860:  19  3 17  1 18  3 16  0              1020.1449100  1020.1452791 -0.0003691 -0.0004000 0.0000309
 2861:  18  3 15  1 17  3 14  0              1020.1574100  1020.1580279 -0.0006179 -0.0004000 0.0000411
 2862:  20  2 19  1 19  2 18  0              1020.1658200  1020.1657028  0.0001172 -0.0004000 0.0000465  1020.1653753  0.0004447 0.3333
 2863:  21  0 21  1 20  0 20  0              1020.1658200  1020.1652933  0.0005267 -0.0004000 0.0000465  1020.1653753  0.0004447 0.3333
 2864:  21  1 21  1 20  1 20  0              1020.1658200  1020.1651298  0.0006902 -0.0004000 0.0000465  1020.1653753  0.0004447 0.3333
 2865:  20  1 19  1 19  1 18  0              1020.1722700  1020.1724091 -0.0001391 -0.0004000 0.0000367
 2866:  19  7 12  1 18  7 11  0              1020.1905600  1020.1900176  0.0005424 -0.0004000 0.0000484  1020.1900283  0.0005317 0.2500
 2867:  19  7 13  1 18  7 12  0              1020.1905600  1020.1899801  0.0005799 -0.0004000 0.0000484  1020.1900283  0.0005317 0.2500
 2868:  19 10  9  1 18 10  8  0              1020.1905600  1020.1900577  0.0005023 -0.0004000 0.0000484  1020.1900283  0.0005317 0.2500
 2869:  19 10 10  1 18 10  9  0              1020.1905600  1020.1900577  0.0005023 -0.0004000 0.0000484  1020.1900283  0.0005317 0.2500
 2870:  19  6 13  1 18  6 12  0              1020.1950000  1020.1949305  0.0000695 -0.0004000 0.0000479  1020.1949913  0.0000087 0.2500
 2871:  19  6 14  1 18  6 13  0              1020.1950000  1020.1941311  0.0008689 -0.0004000 0.0000479  1020.1949913  0.0000087 0.2500
 2872:  19 12  7  1 18 12  6  0              1020.1950000  1020.1954517 -0.0004517 -0.0004000 0.0000479  1020.1949913  0.0000087 0.2500
 2873:  19 12  8  1 18 12  7  0              1020.1950000  1020.1954517 -0.0004517 -0.0004000 0.0000479  1020.1949913  0.0000087 0.2500
 2874:  19  5 15  1 18  5 14  0              1020.1995600  1020.1997878 -0.0002278 -0.0004000 0.0000292
 2875:  19  2 17  1 18  2 16  0              1020.2038200  1020.2042159 -0.0003959 -0.0004000 0.0000359
 2876:  19  5 14  1 18  5 13  0              1020.2100600  1020.2103128 -0.0002528 -0.0004000 0.0000298
 2877:  19  4 15  1 18  4 14  0              1020.2584900  1020.2592941 -0.0008041 -0.0004000 0.0000381
 2878:  20  3 18  1 19  3 17  0              1020.2626200  1020.2630268 -0.0004068 -0.0004000 0.0000329
 2879:  21  2 20  1 20  2 19  0              1020.2778800  1020.2780955 -0.0002155 -0.0004000 0.0000395
 2880:  21  1 20  1 20  1 19  0              1020.2826300  1020.2828074 -0.0001774 -0.0004000 0.0000393
 2881:  20  2 18  1 19  2 17  0              1020.3127700  1020.3135286 -0.0007586 -0.0004000 0.0000370
 2882:  20 10 10  1 19 10  9  0              1020.3181500  1020.3178299  0.0003201 -0.0004000 0.0000611  1020.3178299  0.0003201 0.5000
 2883:  20 10 11  1 19 10 10  0              1020.3181500  1020.3178299  0.0003201 -0.0004000 0.0000611  1020.3178299  0.0003201 0.5000
 2884:  20  7 13  1 19  7 12  0              1020.3197200  1020.3193779  0.0003421 -0.0004000 0.0000498  1020.3196295  0.0000905 0.2500
 2885:  20  7 14  1 19  7 13  0              1020.3197200  1020.3193037  0.0004163 -0.0004000 0.0000498  1020.3196295  0.0000905 0.2500
 2886:  20 11  9  1 19 11  8  0              1020.3197200  1020.3199182 -0.0001982 -0.0004000 0.0000498  1020.3196295  0.0000905 0.2500
 2887:  20 11 10  1 19 11  9  0              1020.3197200  1020.3199182 -0.0001982 -0.0004000 0.0000498  1020.3196295  0.0000905 0.2500
 2888:  20 12  8  1 19 12  7  0              1020.3230500  1020.3227999  0.0002501 -0.0004000 0.0000732  1020.3227999  0.0002501 0.5000
 2889:  20 12  9  1 19 12  8  0              1020.3230500  1020.3227999  0.0002501 -0.0004000 0.0000732  1020.3227999  0.0002501 0.5000
 2890:  20  6 14  1 19  6 13  0              1020.3256100  1020.3258239 -0.0002139 -0.0004000 0.0000579  1020.3261711 -0.0005611 0.3333
 2891:  20 13  7  1 19 13  6  0              1020.3256100  1020.3263448 -0.0007348 -0.0004000 0.0000579  1020.3261711 -0.0005611 0.3333
 2892:  20 13  8  1 19 13  7  0              1020.3256100  1020.3263448 -0.0007348 -0.0004000 0.0000579  1020.3261711 -0.0005611 0.3333
 2893:  20  5 16  1 19  5 15  0              1020.3299500  1020.3300862 -0.0001362 -0.0004000 0.0000313
 2894:  20  5 15  1 19  5 14  0              1020.3455600  1020.3461639 -0.0006039 -0.0004000 0.0000327
 2895:  21  3 19  1 20  3 18  0              1020.3792400  1020.3797189 -0.0004789 -0.0004000 0.0000349
 2896:  22  2 21  1 21  2 20  0              1020.3903600  1020.3902670  0.0000930 -0.0004000 0.0000419
 2897:  22  1 21  1 21  1 20  0              1020.3936600  1020.3935360  0.0001240 -0.0004000 0.0000418
 2898:  24  7 18  1 24  6 19  0              1020.4172200  1020.4177726 -0.0005526 -0.0004000 0.0000383
 2899:  21  2 19  1 20  2 18  0              1020.4210800  1020.4214784 -0.0003984 -0.0004000 0.0000380
 2900:  21  8 13  1 20  8 12  0              1020.4466100  1020.4459013  0.0007087 -0.0004000 0.0000441  1020.4458985  0.0007115 0.5000
 2901:  21  8 14  1 20  8 13  0              1020.4466100  1020.4458956  0.0007144 -0.0004000 0.0000441  1020.4458985  0.0007115 0.5000
 2902:  21  7 14  1 20  7 13  0              1020.4494500  1020.4491218  0.0003282 -0.0004000 0.0000503  1020.4496664 -0.0002164 0.2500
 2903:  21  7 15  1 20  7 14  0              1020.4494500  1020.4489806  0.0004694 -0.0004000 0.0000503  1020.4496664 -0.0002164 0.2500
 2904:  21 12  9  1 20 12  8  0              1020.4494500  1020.4502815 -0.0008315 -0.0004000 0.0000503  1020.4496664 -0.0002164 0.2500
 2905:  21 12 10  1 20 12  9  0              1020.4494500  1020.4502815 -0.0008315 -0.0004000 0.0000503  1020.4496664 -0.0002164 0.2500
 2906:  21  6 16  1 20  6 15  0              1020.4549500  1020.4550851 -0.0001351 -0.0004000 0.0000330
 2907:  21  6 15  1 20  6 14  0              1020.4575000  1020.4574512  0.0000488 -0.0004000 0.0000331
 2908:  21  5 17  1 20  5 16  0              1020.4598800  1020.4602461 -0.0003661 -0.0004000 0.0000338
 2909:  22  3 20  1 21  3 19  0              1020.4949000  1020.4954537 -0.0005537 -0.0004000 0.0000367
 2910:  23  2 22  1 22  2 21  0              1020.5023800  1020.5022794  0.0001006 -0.0004000 0.0000442
 2911:  23  1 22  1 22  1 21  0              1020.5049500  1020.5045230  0.0004270 -0.0004000 0.0000441
 2912:  22  2 20  1 21  2 19  0              1020.5284800  1020.5288712 -0.0003912 -0.0004000 0.0000390
 2913:  22  4 19  1 21  4 18  0              1020.5667700  1020.5669297 -0.0001597 -0.0004000 0.0000378
 2914:  22  8 14  1 21  8 13  0              1020.5755500  1020.5750695  0.0004805 -0.0004000 0.0000532  1020.5752532  0.0002968 0.2500
 2915:  22  8 15  1 21  8 14  0              1020.5755500  1020.5750579  0.0004921 -0.0004000 0.0000532  1020.5752532  0.0002968 0.2500
 2916:  22 11 11  1 21 11 10  0              1020.5755500  1020.5754427  0.0001073 -0.0004000 0.0000532  1020.5752532  0.0002968 0.2500
 2917:  22 11 12  1 21 11 11  0              1020.5755500  1020.5754427  0.0001073 -0.0004000 0.0000532  1020.5752532  0.0002968 0.2500
 2918:  22  7 15  1 21  7 14  0              1020.5794600  1020.5792855  0.0001745 -0.0004000 0.0000371  1020.5791557  0.0003043 0.5000
 2919:  22  7 16  1 21  7 15  0              1020.5794600  1020.5790260  0.0004340 -0.0004000 0.0000371  1020.5791557  0.0003043 0.5000
 2920:  22  6 17  1 21  6 16  0              1020.5857600  1020.5860763 -0.0003163 -0.0004000 0.0000346
 2921:  22  5 18  1 21  5 17  0              1020.5896700  1020.5900976 -0.0004276 -0.0004000 0.0000352  1020.5900268 -0.0003568 0.5000
 2922:  22  6 16  1 21  6 15  0              1020.5896700  1020.5899561 -0.0002861 -0.0004000 0.0000352  1020.5900268 -0.0003568 0.5000
 2923:  23  3 21  1 22  3 20  0              1020.6104100  1020.6103457  0.0000643 -0.0004000 0.0000383
 2924:  24  2 23  1 23  2 22  0              1020.6147500  1020.6141812  0.0005688 -0.0004000 0.0000463
 2925:  24  1 23  1 23  1 22  0              1020.6163000  1020.6157067  0.0005933 -0.0004000 0.0000462
 2926:  23  2 21  1 22  2 20  0              1020.6355400  1020.6363255 -0.0007855 -0.0004000 0.0000399
 2927:  22  3 19  1 21  3 18  0              1020.6646400  1020.6640412  0.0005988 -0.0004000 0.0000547
 2928:  23  8 15  1 22  8 14  0              1020.7041500  1020.7045489 -0.0003989 -0.0004000 0.0000433  1020.7045373 -0.0003873 0.5000
 2929:  23  8 16  1 22  8 15  0              1020.7041500  1020.7045258 -0.0003758 -0.0004000 0.0000433  1020.7045373 -0.0003873 0.5000
 2930:  23  7 16  1 22  7 15  0              1020.7099900  1020.7099138  0.0000762 -0.0004000 0.0000376  1020.7096828  0.0003072 0.5000
 2931:  23  7 17  1 22  7 16  0              1020.7099900  1020.7094518  0.0005382 -0.0004000 0.0000376  1020.7096828  0.0003072 0.5000
 2932:  24  2 22  1 23  2 21  0              1020.7440500  1020.7442210 -0.0001710 -0.0004000 0.0000408
 2933:  24  3 22  1 23  2 21  0              1020.7944800  1020.7948284 -0.0003484 -0.0004000 0.0000376  1020.7943800  0.0001000 0.5000
 2934:  30  8 23  1 30  7 24  0              1020.7944800  1020.7939316  0.0005484 -0.0004000 0.0000376  1020.7943800  0.0001000 0.5000
 2935:  24  8 16  1 23  8 15  0              1020.8337800  1020.8343594 -0.0005794 -0.0004000 0.0000431  1020.8343373 -0.0005573 0.5000
 2936:  24  8 17  1 23  8 16  0              1020.8337800  1020.8343152 -0.0005352 -0.0004000 0.0000431  1020.8343373 -0.0005573 0.5000
 2937:  25  2 23  1 24  2 22  0              1020.8530500  1020.8527270  0.0003230 -0.0004000 0.0000416
 2938:  24  3 21  1 23  3 20  0              1020.8954100  1020.8948123  0.0005977 -0.0004000 0.0000576
 2939:  10  5  5  1  9  4  6  0              1020.9101900  1020.9098841  0.0003059 -0.0004000 0.0000364  1020.9097793  0.0004107 0.2500
 2940:  11  8  3  1 11  7  4  0              1020.9101900  1020.9095244  0.0006656 -0.0004000 0.0000364  1020.9097793  0.0004107 0.2500
 2941:  11  8  4  1 11  7  5  0              1020.9101900  1020.9095244  0.0006656 -0.0004000 0.0000364  1020.9097793  0.0004107 0.2500
 2942:  24  5 19  1 23  5 18  0              1020.9101900  1020.9101843  0.0000057 -0.0004000 0.0000364  1020.9097793  0.0004107 0.2500
 2943:  28  0 28  1 27  0 27  0              1020.9459100  1020.9463521 -0.0004421 -0.0004000 0.0000701  1020.9463487 -0.0004387 0.5000
 2944:  28  1 28  1 27  1 27  0              1020.9459100  1020.9463454 -0.0004354 -0.0004000 0.0000701  1020.9463487 -0.0004387 0.5000
 2945:  26  3 24  1 25  3 23  0              1020.9505200  1020.9511871 -0.0006671 -0.0004000 0.0000477  1020.9504022  0.0001178 0.2500
 2946:  27  1 26  1 26  1 25  0              1020.9505200  1020.9500023  0.0005177 -0.0004000 0.0000477  1020.9504022  0.0001178 0.2500
 2947:  27  1 26  1 26  2 25  0              1020.9505200  1020.9486706  0.0018494 -0.0004000 0.0000477  1020.9504022  0.0001178 0.0000
 2948:  27  2 26  1 26  1 25  0              1020.9505200  1020.9508755 -0.0003555 -0.0004000 0.0000477  1020.9504022  0.0001178 0.2500
 2949:  27  2 26  1 26  2 25  0              1020.9505200  1020.9495438  0.0009762 -0.0004000 0.0000477  1020.9504022  0.0001178 0.2500
 2950:  25 12 13  1 24 12 12  0              1020.9614500  1020.9616551 -0.0002051 -0.0004000 0.0000516  1020.9617260 -0.0002760 0.3333
 2951:  25 12 14  1 24 12 13  0              1020.9614500  1020.9616551 -0.0002051 -0.0004000 0.0000516  1020.9617260 -0.0002760 0.3333
 2952:  26  2 24  1 25  2 23  0              1020.9614500  1020.9618677 -0.0004177 -0.0004000 0.0000516  1020.9617260 -0.0002760 0.3333
 2953:  25  7 19  1 24  7 18  0              1020.9714300  1020.9714649 -0.0000349 -0.0004000 0.0000393
 2954:  25  5 21  1 24  5 20  0              1020.9761300  1020.9759865  0.0001435 -0.0004000 0.0000452
 2955:  25  3 22  1 24  3 21  0              1021.0053200  1021.0052465  0.0000735 -0.0004000 0.0000579
 2956:  17  4 14  1 16  3 13  0              1021.0585600  1021.0584737  0.0000863 -0.0004000 0.0000259
 2957:  29  0 29  1 28  0 28  0              1021.0591700  1021.0579846  0.0011854 -0.0004000 0.0000715  1021.0579825  0.0011875 0.2500
 2958:  29  0 29  1 28  1 28  0              1021.0591700  1021.0579734  0.0011966 -0.0004000 0.0000715  1021.0579825  0.0011875 0.2500
 2959:  29  1 29  1 28  0 28  0              1021.0591700  1021.0579916  0.0011784 -0.0004000 0.0000715  1021.0579825  0.0011875 0.2500
 2960:  29  1 29  1 28  1 28  0              1021.0591700  1021.0579804  0.0011896 -0.0004000 0.0000715  1021.0579825  0.0011875 0.2500
 2961:  27  3 25  1 26  3 24  0              1021.0634800  1021.0639058 -0.0004258 -0.0004000 0.0000425
 2962:  26  9 17  1 25  9 16  0              1021.0901600  1021.0904172 -0.0002572 -0.0004000 0.0000621  1021.0901515  0.0000085 0.2500
 2963:  26  9 18  1 25  9 17  0              1021.0901600  1021.0904102 -0.0002502 -0.0004000 0.0000621  1021.0901515  0.0000085 0.2500
 2964:  26 12 14  1 25 12 13  0              1021.0901600  1021.0898893  0.0002707 -0.0004000 0.0000621  1021.0901515  0.0000085 0.2500
 2965:  26 12 15  1 25 12 14  0              1021.0901600  1021.0898893  0.0002707 -0.0004000 0.0000621  1021.0901515  0.0000085 0.2500
 2966:  26  3 23  1 25  3 22  0              1021.1134300  1021.1133190  0.0001110 -0.0004000 0.0000577
 2967:  27  4 24  1 26  4 23  0              1021.1653500  1021.1659240 -0.0005740 -0.0004000 0.0000464
 2968:  30  0 30  1 29  0 29  0              1021.1695900  1021.1696283 -0.0000383 -0.0004000 0.0000727  1021.1696270 -0.0000370 0.5000
 2969:  30  1 30  1 29  1 29  0              1021.1695900  1021.1696256 -0.0000356 -0.0004000 0.0000727  1021.1696270 -0.0000370 0.5000
 2970:  29  1 28  1 28  2 27  0              1021.1719000  1021.1726494 -0.0007494 -0.0004000 0.0000529  1021.1726494 -0.0007494 1.0000
 2971:  29  2 28  1 28  2 27  0              1021.1719000  1021.1730205 -0.0011205 -0.0004000 0.0000529  1021.1726494 -0.0007494 0.0000
 2972:  27 10 17  1 26 10 16  0              1021.2189900  1021.2177905  0.0011995 -0.0004000 0.0000703  1021.2180409  0.0009491 0.2500
 2973:  27 10 18  1 26 10 17  0              1021.2189900  1021.2177899  0.0012001 -0.0004000 0.0000703  1021.2180409  0.0009491 0.2500
 2974:  27 12 15  1 26 12 14  0              1021.2189900  1021.2182917  0.0006983 -0.0004000 0.0000703  1021.2180409  0.0009491 0.2500
 2975:  27 12 16  1 26 12 15  0              1021.2189900  1021.2182917  0.0006983 -0.0004000 0.0000703  1021.2180409  0.0009491 0.2500
 2976:  27  8 19  1 26  8 18  0              1021.2261400  1021.2260270  0.0001130 -0.0004000 0.0000439  1021.2258969  0.0002431 0.5000
 2977:  27  8 20  1 26  8 19  0              1021.2261400  1021.2257669  0.0003731 -0.0004000 0.0000439  1021.2258969  0.0002431 0.5000
 2978:  27  7 21  1 26  7 20  0              1021.2348900  1021.2349675 -0.0000775 -0.0004000 0.0000428
 2979:  27  7 20  1 26  7 19  0              1021.2379300  1021.2384859 -0.0005559 -0.0004000 0.0000432
 2980:  27  6 22  1 26  6 21  0              1021.2427300  1021.2432024 -0.0004724 -0.0004000 0.0000479
 2981:  27  6 21  1 26  6 20  0              1021.2739300  1021.2732550  0.0006750 -0.0004000 0.0000548
 2982:  31  0 31  1 30  0 30  0              1021.2811100  1021.2812830 -0.0001730 -0.0004000 0.0000738  1021.2812821 -0.0001721 0.5000
 2983:  31  1 31  1 30  1 30  0              1021.2811100  1021.2812813 -0.0001713 -0.0004000 0.0000738  1021.2812821 -0.0001721 0.5000
 2984:  30  2 29  1 29  2 28  0              1021.2840300  1021.2847594 -0.0007294 -0.0004000 0.0000536
 2985:  29  3 27  1 28  3 26  0              1021.2886900  1021.2885648  0.0001252 -0.0004000 0.0000432
 2986:  10  6  4  1  9  5  5  0              1021.3300300  1021.3302398 -0.0002098 -0.0004000 0.0000452  1021.3298591  0.0001709 0.3333
 2987:  10  6  5  1  9  5  4  0              1021.3300300  1021.3302239 -0.0001939 -0.0004000 0.0000452  1021.3298591  0.0001709 0.3333
 2988:  14  9  5  1 14  8  6  0              1021.3300300  1021.3291135  0.0009165 -0.0004000 0.0000452  1021.3298591  0.0001709 0.3333
 2989:  27  5 22  1 26  5 21  0              1021.3477100  1021.3468438  0.0008662 -0.0004000 0.0000591  1021.3477520 -0.0000420 0.2000
 2990:  28 10 18  1 27 10 17  0              1021.3477100  1021.3472619  0.0004481 -0.0004000 0.0000591  1021.3477520 -0.0000420 0.2000
 2991:  28 10 19  1 27 10 18  0              1021.3477100  1021.3472608  0.0004492 -0.0004000 0.0000591  1021.3477520 -0.0000420 0.2000
 2992:  28 13 15  1 27 13 14  0              1021.3477100  1021.3486967 -0.0009867 -0.0004000 0.0000591  1021.3477520 -0.0000420 0.2000
 2993:  28 13 16  1 27 13 15  0              1021.3477100  1021.3486967 -0.0009867 -0.0004000 0.0000591  1021.3477520 -0.0000420 0.2000
 2994:  28  9 19  1 27  9 18  0              1021.3510900  1021.3505268  0.0005632 -0.0004000 0.0000516  1021.3505141  0.0005759 0.5000
 2995:  28  9 20  1 27  9 19  0              1021.3510900  1021.3505014  0.0005886 -0.0004000 0.0000516  1021.3505141  0.0005759 0.5000
 2996:  28  8 21  1 27  8 20  0              1021.3570500  1021.3569911  0.0000589 -0.0004000 0.0000449
 2997:   7  7  0  1  6  6  1  0              1021.3729800  1021.3721030  0.0008770 -0.0004000 0.0000387  1021.3723010  0.0006790 0.3333
 2998:   7  7  1  1  6  6  0  0              1021.3729800  1021.3721030  0.0008770 -0.0004000 0.0000387  1021.3723010  0.0006790 0.3333
 2999:  28  7 21  1 27  7 20  0              1021.3729800  1021.3726971  0.0002829 -0.0004000 0.0000387  1021.3723010  0.0006790 0.3333
 3000:  32  0 32  1 31  0 31  0              1021.3926100  1021.3929487 -0.0003387 -0.0004000 0.0000748  1021.3929482 -0.0003382 0.5000
 3001:  32  1 32  1 31  1 31  0              1021.3926100  1021.3929477 -0.0003377 -0.0004000 0.0000748  1021.3929482 -0.0003382 0.5000
 3002:  31  1 30  1 30  1 29  0              1021.3969100  1021.3965905  0.0003195 -0.0004000 0.0000542  1021.3965478  0.0003622 0.5000
 3003:  31  2 30  1 30  2 29  0              1021.3969100  1021.3965052  0.0004048 -0.0004000 0.0000542  1021.3965478  0.0003622 0.5000
 3004:  29 10 19  1 28 10 18  0              1021.4772400  1021.4769907  0.0002493 -0.0004000 0.0000638  1021.4769897  0.0002503 0.5000
 3005:  29 10 20  1 28 10 19  0              1021.4772400  1021.4769886  0.0002514 -0.0004000 0.0000638  1021.4769897  0.0002503 0.5000
 3006:  29  9 20  1 28  9 19  0              1021.4811200  1021.4810674  0.0000526 -0.0004000 0.0000526  1021.4810442  0.0000758 0.5000
 3007:  29  9 21  1 28  9 20  0              1021.4811200  1021.4810210  0.0000990 -0.0004000 0.0000526  1021.4810442  0.0000758 0.5000
 3008:  29  8 22  1 28  8 21  0              1021.4886200  1021.4886019  0.0000181 -0.0004000 0.0000466
 3009:  33  0 33  1 32  0 32  0              1021.5042300  1021.5046255 -0.0003955 -0.0004000 0.0000759  1021.5046252 -0.0003952 0.5000
 3010:  33  1 33  1 32  1 32  0              1021.5042300  1021.5046248 -0.0003948 -0.0004000 0.0000759  1021.5046252 -0.0003952 0.5000
 3011:  29  7 22  1 28  7 21  0              1021.5071900  1021.5080690 -0.0008790 -0.0004000 0.0000549  1021.5082884 -0.0010984 0.0000
 3012:  32  1 31  1 31  1 30  0              1021.5071900  1021.5083161 -0.0011261 -0.0004000 0.0000549  1021.5082884 -0.0010984 0.2500
 3013:  32  1 31  1 31  2 30  0              1021.5071900  1021.5081606 -0.0009706 -0.0004000 0.0000549  1021.5082884 -0.0010984 0.2500
 3014:  32  2 31  1 31  1 30  0              1021.5071900  1021.5084161 -0.0012261 -0.0004000 0.0000549  1021.5082884 -0.0010984 0.2500
 3015:  32  2 31  1 31  2 30  0              1021.5071900  1021.5082607 -0.0010707 -0.0004000 0.0000549  1021.5082884 -0.0010984 0.2500
 3016:  30  4 27  1 29  4 26  0              1021.5121100  1021.5122953 -0.0001853 -0.0004000 0.0000445  1021.5124563 -0.0003463 0.5000
 3017:  31  3 29  1 30  3 28  0              1021.5121100  1021.5126173 -0.0005073 -0.0004000 0.0000445  1021.5124563 -0.0003463 0.5000
 3018:  30 10 20  1 29 10 19  0              1021.6071600  1021.6069886  0.0001714 -0.0004000 0.0000946  1021.6075298 -0.0003698 0.2500
 3019:  30 10 21  1 29 10 20  0              1021.6071600  1021.6069844  0.0001756 -0.0004000 0.0000946  1021.6075298 -0.0003698 0.2500
 3020:  30 14 16  1 29 14 15  0              1021.6071600  1021.6080731 -0.0009131 -0.0004000 0.0000946  1021.6075298 -0.0003698 0.2500
 3021:  30 14 17  1 29 14 16  0              1021.6071600  1021.6080731 -0.0009131 -0.0004000 0.0000946  1021.6075298 -0.0003698 0.2500
 3022:  30  9 21  1 29  9 20  0              1021.6122800  1021.6119586  0.0003214 -0.0004000 0.0000541  1021.6119172  0.0003628 0.5000
 3023:  30  9 22  1 29  9 21  0              1021.6122800  1021.6118759  0.0004041 -0.0004000 0.0000541  1021.6119172  0.0003628 0.5000
 3024:  34  0 34  1 33  0 33  0              1021.6166400  1021.6163135  0.0003265 -0.0004000 0.0000775  1021.6163133  0.0003267 0.5000
 3025:  34  1 34  1 33  1 33  0              1021.6166400  1021.6163131  0.0003269 -0.0004000 0.0000775  1021.6163133  0.0003267 0.5000
 3026:  30  8 23  1 29  8 22  0              1021.6202200  1021.6206015 -0.0003815 -0.0004000 0.0000423  1021.6202309 -0.0000109 0.3333
 3027:  33  1 32  1 32  1 31  0              1021.6202200  1021.6200636  0.0001564 -0.0004000 0.0000423  1021.6202309 -0.0000109 0.3333
 3028:  33  2 32  1 32  2 31  0              1021.6202200  1021.6200277  0.0001923 -0.0004000 0.0000423  1021.6202309 -0.0000109 0.3333
 3029:  30  7 23  1 29  7 22  0              1021.6451200  1021.6448350  0.0002850 -0.0004000 0.0000568
 3030:  35  0 35  1 34  0 34  0              1021.7285700  1021.7280128  0.0005572 -0.0004000 0.0000799  1021.7280127  0.0005573 0.5000
 3031:  35  1 35  1 34  1 34  0              1021.7285700  1021.7280126  0.0005574 -0.0004000 0.0000799  1021.7280127  0.0005573 0.5000
 3032:  34  1 33  1 33  1 32  0              1021.7316600  1021.7318305 -0.0001705 -0.0004000 0.0000579  1021.7318190 -0.0001590 0.5000
 3033:  34  2 33  1 33  2 32  0              1021.7316600  1021.7318074 -0.0001474 -0.0004000 0.0000579  1021.7318190 -0.0001590 0.5000
 3034:  31 14 17  1 30 14 16  0              1021.7357200  1021.7365786 -0.0008586 -0.0004000 0.0000961  1021.7365195 -0.0007995 0.3333
 3035:  31 14 18  1 30 14 17  0              1021.7357200  1021.7365786 -0.0008586 -0.0004000 0.0000961  1021.7365195 -0.0007995 0.3333
 3036:  33  3 31  1 32  3 30  0              1021.7357200  1021.7364015 -0.0006815 -0.0004000 0.0000961  1021.7365195 -0.0007995 0.3333
 3037:  31  9 22  1 30  9 21  0              1021.7435700  1021.7432242  0.0003458 -0.0004000 0.0000565  1021.7431523  0.0004177 0.5000
 3038:  31  9 23  1 30  9 22  0              1021.7435700  1021.7430805  0.0004895 -0.0004000 0.0000565  1021.7431523  0.0004177 0.5000
 3039:  31  6 26  1 30  6 25  0              1021.7628600  1021.7630457 -0.0001857 -0.0004000 0.0000672
 3040:  31  7 24  1 30  7 23  0              1021.7830800  1021.7832605 -0.0001805 -0.0004000 0.0000646
 3041:  36  0 36  1 35  0 35  0              1021.8403400  1021.8397237  0.0006163 -0.0004000 0.0000834  1021.8397236  0.0006164 0.5000
 3042:  36  1 36  1 35  1 35  0              1021.8403400  1021.8397235  0.0006165 -0.0004000 0.0000834  1021.8397236  0.0006164 0.5000
 3043:  35  1 34  1 34  1 33  0              1021.8433000  1021.8436154 -0.0003154 -0.0004000 0.0000610  1021.8436080 -0.0003080 0.5000
 3044:  35  2 34  1 34  2 33  0              1021.8433000  1021.8436005 -0.0003005 -0.0004000 0.0000610  1021.8436080 -0.0003080 0.5000
 3045:  34  3 32  1 33  3 31  0              1021.8474400  1021.8482557 -0.0008157 -0.0004000 0.0000486
 3046:  32  9 23  1 31  9 22  0              1021.8750900  1021.8748928  0.0001972 -0.0004000 0.0000599  1021.8747705  0.0003195 0.5000
 3047:  32  9 24  1 31  9 23  0              1021.8750900  1021.8746481  0.0004419 -0.0004000 0.0000599  1021.8747705  0.0003195 0.5000
 3048:  32  7 26  1 31  7 25  0              1021.8973100  1021.8976267 -0.0003167 -0.0004000 0.0000661
 3049:  37  0 37  1 36  0 36  0              1021.9522200  1021.9514462  0.0007738 -0.0004000 0.0000884  1021.9514462  0.0007738 0.5000
 3050:  37  1 37  1 36  1 36  0              1021.9522200  1021.9514462  0.0007738 -0.0004000 0.0000884  1021.9514462  0.0007738 0.5000
 3051:  33  5 29  1 32  5 28  0              1021.9556000  1021.9554330  0.0001670 -0.0004000 0.0000543  1021.9554192  0.0001808 0.3333
 3052:  36  1 35  1 35  1 34  0              1021.9556000  1021.9554171  0.0001829 -0.0004000 0.0000543  1021.9554192  0.0001808 0.3333
 3053:  36  2 35  1 35  2 34  0              1021.9556000  1021.9554075  0.0001925 -0.0004000 0.0000543  1021.9554192  0.0001808 0.3333
 3054:  35  3 33  1 34  3 32  0              1021.9595800  1021.9601048 -0.0005248 -0.0004000 0.0000528
 3055:  33 10 23  1 32 10 22  0              1021.9995000  1021.9987269  0.0007731 -0.0004000 0.0001457  1021.9994033  0.0000967 0.2500
 3056:  33 10 24  1 32 10 23  0              1021.9995000  1021.9987012  0.0007988 -0.0004000 0.0001457  1021.9994033  0.0000967 0.2500
 3057:  33 16 17  1 32 16 16  0              1021.9995000  1022.0000925 -0.0005925 -0.0004000 0.0001457  1021.9994033  0.0000967 0.2500
 3058:  33 16 18  1 32 16 17  0              1021.9995000  1022.0000925 -0.0005925 -0.0004000 0.0001457  1021.9994033  0.0000967 0.2500
 3059:  12  7  5  1 11  6  6  0              1022.0019600  1022.0021891 -0.0002291 -0.0004000 0.0000448  1022.0021880 -0.0002280 0.5000
 3060:  12  7  6  1 11  6  5  0              1022.0019600  1022.0021869 -0.0002269 -0.0004000 0.0000448  1022.0021880 -0.0002280 0.5000
 3061:  32  6 26  1 31  6 25  0              1022.0039700  1022.0034561  0.0005139 -0.0004000 0.0001134
 3062:  33  9 24  1 32  9 23  0              1022.0069700  1022.0069993 -0.0000293 -0.0004000 0.0000646  1022.0067950  0.0001750 0.5000
 3063:  33  9 25  1 32  9 24  0              1022.0069700  1022.0065908  0.0003792 -0.0004000 0.0000646  1022.0067950  0.0001750 0.5000
 3064:  38  0 38  1 37  0 37  0              1022.0637500  1022.0631807  0.0005693 -0.0004000 0.0000954  1022.0631807  0.0005693 0.5000
 3065:  38  1 38  1 37  1 37  0              1022.0637500  1022.0631806  0.0005694 -0.0004000 0.0000954  1022.0631807  0.0005693 0.5000
 3066:  37  1 36  1 36  1 35  0              1022.0665500  1022.0672348 -0.0006848 -0.0004000 0.0000723
 3067:  34  5 30  1 33  5 29  0              1022.0719200  1022.0722617 -0.0003417 -0.0004000 0.0000590  1022.0721465 -0.0002265 0.3333
 3068:  36  2 34  1 35  2 33  0              1022.0719200  1022.0722197 -0.0002997 -0.0004000 0.0000590  1022.0721465 -0.0002265 0.3333
 3069:  36  3 34  1 35  3 33  0              1022.0719200  1022.0719581 -0.0000381 -0.0004000 0.0000590  1022.0721465 -0.0002265 0.3333
 3070:  34 12 22  1 33 12 21  0              1022.1230100  1022.1223583  0.0006517 -0.0004000 0.0001505  1022.1226948  0.0003152 0.2500
 3071:  34 12 23  1 33 12 22  0              1022.1230100  1022.1223582  0.0006518 -0.0004000 0.0001505  1022.1226948  0.0003152 0.2500
 3072:  34 14 20  1 33 14 19  0              1022.1230100  1022.1230313 -0.0000213 -0.0004000 0.0001505  1022.1226948  0.0003152 0.2500
 3073:  34 14 21  1 33 14 20  0              1022.1230100  1022.1230313 -0.0000213 -0.0004000 0.0001505  1022.1226948  0.0003152 0.2500
 3074:  39  0 39  1 38  0 38  0              1022.1754000  1022.1749272  0.0004728 -0.0004000 0.0001047  1022.1749272  0.0004728 0.5000
 3075:  39  1 39  1 38  1 38  0              1022.1754000  1022.1749272  0.0004728 -0.0004000 0.0001047  1022.1749272  0.0004728 0.5000
 3076:  38  1 37  1 37  1 36  0              1022.1786700  1022.1790681 -0.0003981 -0.0004000 0.0000811  1022.1790662 -0.0003962 0.5000
 3077:  38  2 37  1 37  2 36  0              1022.1786700  1022.1790642 -0.0003942 -0.0004000 0.0000811  1022.1790662 -0.0003962 0.5000
 3078:  37  2 35  1 36  3 34  0              1022.1827200  1022.1834855 -0.0007655 -0.0004000 0.0000670  1022.1834855 -0.0007655 1.0000
 3079:  37  3 35  1 36  3 34  0              1022.1827200  1022.1838219 -0.0011019 -0.0004000 0.0000670  1022.1834855 -0.0007655 0.0000
 3080:  35  5 31  1 34  5 30  0              1022.1876700  1022.1880939 -0.0004239 -0.0004000 0.0000820
 3081:  35 10 25  1 34 10 24  0              1022.2615200  1022.2614941  0.0000259 -0.0004000 0.0000882  1022.2614550  0.0000650 0.5000
 3082:  35 10 26  1 34 10 25  0              1022.2615200  1022.2614159  0.0001041 -0.0004000 0.0000882  1022.2614550  0.0000650 0.5000
 3083:  20  4 16  1 19  3 17  0              1022.2654500  1022.2643554  0.0010946 -0.0004000 0.0000439
 3084:  35  6 30  1 34  6 29  0              1022.2668400  1022.2663520  0.0004880 -0.0004000 0.0000970
 3085:  35  9 26  1 34  9 25  0              1022.2724600  1022.2727090 -0.0002490 -0.0004000 0.0000792
 3086:  35  8 28  1 34  8 27  0              1022.2859400  1022.2857843  0.0001557 -0.0004000 0.0000841  1022.2863855 -0.0004455 0.3333
 3087:  40  0 40  1 39  0 39  0              1022.2859400  1022.2866861 -0.0007461 -0.0004000 0.0000841  1022.2863855 -0.0004455 0.3333
 3088:  40  1 40  1 39  1 39  0              1022.2859400  1022.2866861 -0.0007461 -0.0004000 0.0000841  1022.2863855 -0.0004455 0.3333
 3089:  39  1 38  1 38  1 37  0              1022.2903100  1022.2909168 -0.0006068 -0.0004000 0.0000924  1022.2909155 -0.0006055 0.5000
 3090:  39  2 38  1 38  2 37  0              1022.2903100  1022.2909143 -0.0006043 -0.0004000 0.0000924  1022.2909155 -0.0006055 0.5000
 3091:  36 12 24  1 35 12 23  0              1022.3821200  1022.3825607 -0.0004407 -0.0004000 0.0001905  1022.3828807 -0.0007607 0.2500
 3092:  36 12 25  1 35 12 24  0              1022.3821200  1022.3825603 -0.0004403 -0.0004000 0.0001905  1022.3828807 -0.0007607 0.2500
 3093:  36 15 21  1 35 15 20  0              1022.3821200  1022.3832009 -0.0010809 -0.0004000 0.0001905  1022.3828807 -0.0007607 0.2500
 3094:  36 15 22  1 35 15 21  0              1022.3821200  1022.3832009 -0.0010809 -0.0004000 0.0001905  1022.3828807 -0.0007607 0.2500
 3095:  36  6 31  1 35  6 30  0              1022.3894800  1022.3887976  0.0006824 -0.0004000 0.0001067
 3096:  36 10 26  1 35 10 25  0              1022.3927800  1022.3934174 -0.0006374 -0.0004000 0.0000966  1022.3933511 -0.0005711 0.5000
 3097:  36 10 27  1 35 10 26  0              1022.3927800  1022.3932848 -0.0005048 -0.0004000 0.0000966  1022.3933511 -0.0005711 0.5000
 3098:  41  0 41  1 40  0 40  0              1022.3985200  1022.3984576  0.0000624 -0.0004000 0.0001310  1022.3984576  0.0000624 0.5000
 3099:  41  1 41  1 40  1 40  0              1022.3985200  1022.3984576  0.0000624 -0.0004000 0.0001310  1022.3984576  0.0000624 0.5000
 3100:  40  1 39  1 39  1 38  0              1022.4025000  1022.4027806 -0.0002806 -0.0004000 0.0001061  1022.4027798 -0.0002798 0.5000
 3101:  40  2 39  1 39  2 38  0              1022.4025000  1022.4027790 -0.0002790 -0.0004000 0.0001061  1022.4027798 -0.0002798 0.5000
 3102:  36  9 27  1 35  9 26  0              1022.4065200  1022.4064355  0.0000845 -0.0004000 0.0000895
 3103:  37 11 26  1 36 11 25  0              1022.5180100  1022.5175049  0.0005051 -0.0004000 0.0001250  1022.5174979  0.0005121 0.5000
 3104:  37 11 27  1 36 11 26  0              1022.5180100  1022.5174909  0.0005191 -0.0004000 0.0001250  1022.5174979  0.0005121 0.5000
 3105:  37 10 27  1 36 10 26  0              1022.5255000  1022.5257331 -0.0002331 -0.0004000 0.0000936  1022.5256988 -0.0001988 0.3333
 3106:  37 10 28  1 36 10 27  0              1022.5255000  1022.5255124 -0.0000124 -0.0004000 0.0000936  1022.5256988 -0.0001988 0.3333
 3107:  39  4 36  1 38  4 35  0              1022.5255000  1022.5258507 -0.0003507 -0.0004000 0.0000936  1022.5256988 -0.0001988 0.3333
 3108:  38  5 34  1 37  5 33  0              1022.5313400  1022.5309283  0.0004117 -0.0004000 0.0001081
 3109:  43  0 43  1 42  0 42  0              1022.6224300  1022.6220393  0.0003907 -0.0004000 0.0001684  1022.6220393  0.0003907 0.5000
 3110:  43  1 43  1 42  1 42  0              1022.6224300  1022.6220393  0.0003907 -0.0004000 0.0001684  1022.6220393  0.0003907 0.5000
 3111:  38  6 33  1 37  6 32  0              1022.6302500  1022.6295455  0.0007045 -0.0004000 0.0001296
 3112:  40  7 34  2 41  7 35  0              1715.7590300  1715.7583883  0.0006417 -0.0004000 0.0002218
 3113:  34  6 28  2 35  6 29  0              1716.3988000  1716.3988681 -0.0000681 -0.0004000 0.0001733  1716.3990379 -0.0002379 0.5000
 3114:  35  8 27  2 36  8 28  0              1716.3988000  1716.3992077 -0.0004077 -0.0004000 0.0001733  1716.3990379 -0.0002379 0.5000
 3115:  36  1 35  2 37  1 36  0              1716.7646600  1716.7642190  0.0004410 -0.0004000 0.0001012  1716.7646292  0.0000308 0.2500
 3116:  36  2 35  2 37  2 36  0              1716.7646600  1716.7642251  0.0004349 -0.0004000 0.0001012  1716.7646292  0.0000308 0.2500
 3117:  37  0 37  2 38  0 38  0              1716.7646600  1716.7650364 -0.0003764 -0.0004000 0.0001012  1716.7646292  0.0000308 0.2500
 3118:  37  1 37  2 38  1 38  0              1716.7646600  1716.7650364 -0.0003764 -0.0004000 0.0001012  1716.7646292  0.0000308 0.2500
 3119:  35  1 34  2 36  1 35  0              1716.8796100  1716.8792210  0.0003890 -0.0004000 0.0000942  1716.8796351 -0.0000251 0.2500
 3120:  35  2 34  2 36  2 35  0              1716.8796100  1716.8792305  0.0003795 -0.0004000 0.0000942  1716.8796351 -0.0000251 0.2500
 3121:  36  0 36  2 37  0 37  0              1716.8796100  1716.8800445 -0.0004345 -0.0004000 0.0000942  1716.8796351 -0.0000251 0.2500
 3122:  36  1 36  2 37  1 37  0              1716.8796100  1716.8800446 -0.0004346 -0.0004000 0.0000942  1716.8796351 -0.0000251 0.2500
 3123:  32  5 28  2 33  5 29  0              1716.8886900  1716.8883096  0.0003804 -0.0004000 0.0001105
 3124:  28  5 23  2 29  5 24  0              1717.2230700  1717.2233982 -0.0003282 -0.0004000 0.0000653  1717.2237795 -0.0007095 0.1667
 3125:  30  4 27  2 31  4 28  0              1717.2230700  1717.2230643  0.0000057 -0.0004000 0.0000653  1717.2237795 -0.0007095 0.1667
 3126:  32  1 31  2 33  1 32  0              1717.2230700  1717.2236108 -0.0005408 -0.0004000 0.0000653  1717.2237795 -0.0007095 0.1667
 3127:  32  2 31  2 33  2 32  0              1717.2230700  1717.2236465 -0.0005765 -0.0004000 0.0000653  1717.2237795 -0.0007095 0.1667
 3128:  33  0 33  2 34  0 34  0              1717.2230700  1717.2244784 -0.0014084 -0.0004000 0.0000653  1717.2237795 -0.0007095 0.1667
 3129:  33  1 33  2 34  1 34  0              1717.2230700  1717.2244788 -0.0014088 -0.0004000 0.0000653  1717.2237795 -0.0007095 0.1667
 3130:  29  4 26  2 30  4 27  0              1717.3394800  1717.3396700 -0.0001900 -0.0004000 0.0000691  1717.3390274  0.0004526 0.2500
 3131:  31  2 30  2 32  2 31  0              1717.3394800  1717.3382529  0.0012271 -0.0004000 0.0000691  1717.3390274  0.0004526 0.2500
 3132:  32  0 32  2 33  0 33  0              1717.3394800  1717.3390930  0.0003870 -0.0004000 0.0000691  1717.3390274  0.0004526 0.2500
 3133:  32  1 32  2 33  1 33  0              1717.3394800  1717.3390936  0.0003864 -0.0004000 0.0000691  1717.3390274  0.0004526 0.2500
 3134:  28  2 26  2 29  2 27  0              1717.5609900  1717.5621311 -0.0011411 -0.0004000 0.0000656
 3135:  29  1 28  2 30  1 29  0              1717.5675400  1717.5670425  0.0004975 -0.0004000 0.0000743  1717.5675678 -0.0000278 0.2500
 3136:  29  2 28  2 30  2 29  0              1717.5675400  1717.5671728  0.0003672 -0.0004000 0.0000743  1717.5675678 -0.0000278 0.2500
 3137:  30  0 30  2 31  0 31  0              1717.5675400  1717.5680272 -0.0004872 -0.0004000 0.0000743  1717.5675678 -0.0000278 0.2500
 3138:  30  1 30  2 31  1 31  0              1717.5675400  1717.5680288 -0.0004888 -0.0004000 0.0000743  1717.5675678 -0.0000278 0.2500
 3139:  27  3 25  2 28  3 26  0              1717.6814900  1717.6806681  0.0008219 -0.0004000 0.0000671  1717.6816292 -0.0001392 0.2000
 3140:  28  1 27  2 29  1 28  0              1717.6814900  1717.6812917  0.0001983 -0.0004000 0.0000671  1717.6816292 -0.0001392 0.2000
 3141:  28  2 27  2 29  2 28  0              1717.6814900  1717.6814906 -0.0000006 -0.0004000 0.0000671  1717.6816292 -0.0001392 0.2000
 3142:  29  0 29  2 30  0 30  0              1717.6814900  1717.6823466 -0.0008566 -0.0004000 0.0000671  1717.6816292 -0.0001392 0.2000
 3143:  29  1 29  2 30  1 30  0              1717.6814900  1717.6823492 -0.0008592 -0.0004000 0.0000671  1717.6816292 -0.0001392 0.2000
 3144:  25  5 21  2 26  5 22  0              1717.7595400  1717.7587667  0.0007733 -0.0004000 0.0000795
 3145:  26  2 24  2 27  2 25  0              1717.7875100  1717.7878559 -0.0003459 -0.0004000 0.0000650
 3146:  26  3 24  2 27  3 25  0              1717.7947600  1717.7955085 -0.0007485 -0.0004000 0.0000607  1717.7955479 -0.0007879 0.3333
 3147:  27  1 26  2 28  1 27  0              1717.7947600  1717.7954165 -0.0006565 -0.0004000 0.0000607  1717.7955479 -0.0007879 0.3333
 3148:  27  2 26  2 28  2 27  0              1717.7947600  1717.7957188 -0.0009588 -0.0004000 0.0000607  1717.7955479 -0.0007879 0.3333
 3149:  23  5 19  2 24  5 20  0              1718.0174700  1718.0177091 -0.0002391 -0.0004000 0.0000686  1718.0171764  0.0002936 0.5000
 3150:  23  6 18  2 24  6 19  0              1718.0174700  1718.0166436  0.0008264 -0.0004000 0.0000686  1718.0171764  0.0002936 0.5000
 3151:  23  7 16  2 24  7 17  0              1718.0245800  1718.0238671  0.0007129 -0.0004000 0.0000565  1718.0243799  0.0002001 0.2000
 3152:  23  7 17  2 24  7 18  0              1718.0245800  1718.0246623 -0.0000823 -0.0004000 0.0000565  1718.0243799  0.0002001 0.2000
 3153:  25  2 24  2 26  2 25  0              1718.0245800  1718.0239343  0.0006457 -0.0004000 0.0000565  1718.0243799  0.0002001 0.2000
 3154:  26  0 26  2 27  0 27  0              1718.0245800  1718.0247124 -0.0001324 -0.0004000 0.0000565  1718.0243799  0.0002001 0.2000
 3155:  26  1 26  2 27  1 27  0              1718.0245800  1718.0247231 -0.0001431 -0.0004000 0.0000565  1718.0243799  0.0002001 0.2000
 3156:  24  2 23  2 25  2 24  0              1718.1388800  1718.1379447  0.0009353 -0.0004000 0.0000655  1718.1384110  0.0004690 0.3333
 3157:  25  0 25  2 26  0 26  0              1718.1388800  1718.1386357  0.0002443 -0.0004000 0.0000655  1718.1384110  0.0004690 0.3333
 3158:  25  1 25  2 26  1 26  0              1718.1388800  1718.1386527  0.0002273 -0.0004000 0.0000655  1718.1384110  0.0004690 0.3333
 3159:  21  3 18  2 22  3 19  0              1718.2055600  1718.2064399 -0.0008799 -0.0004000 0.0000859
 3160:  21  5 17  2 22  5 18  0              1718.2793600  1718.2796676 -0.0003076 -0.0004000 0.0000610  1718.2795263 -0.0001663 0.5000
 3161:  21  6 15  2 22  6 16  0              1718.2793600  1718.2793850 -0.0000250 -0.0004000 0.0000610  1718.2795263 -0.0001663 0.5000
 3162:  18  6 12  2 19  6 13  0              1718.6791500  1718.6795615 -0.0004115 -0.0004000 0.0000624  1718.6799597 -0.0008097 0.5000
 3163:  18  6 13  2 19  6 14  0              1718.6791500  1718.6803579 -0.0012079 -0.0004000 0.0000624  1718.6799597 -0.0008097 0.5000
 3164:  18  7 11  2 19  7 12  0              1718.6851200  1718.6839207  0.0011993 -0.0004000 0.0001021  1718.6844109  0.0007091 0.2500
 3165:  18  7 12  2 19  7 13  0              1718.6851200  1718.6839580  0.0011620 -0.0004000 0.0001021  1718.6844109  0.0007091 0.2500
 3166:  18  8 10  2 19  8 11  0              1718.6851200  1718.6848818  0.0002382 -0.0004000 0.0001021  1718.6844109  0.0007091 0.2500
 3167:  18  8 11  2 19  8 12  0              1718.6851200  1718.6848830  0.0002370 -0.0004000 0.0001021  1718.6844109  0.0007091 0.2500
 3168:  19  1 18  2 20  1 19  0              1718.7013000  1718.7013908 -0.0000908 -0.0004000 0.0000448
 3169:  20  0 20  2 21  0 21  0              1718.7074400  1718.7067098  0.0007302 -0.0004000 0.0000540  1718.7067913  0.0006487 0.5000
 3170:  20  1 20  2 21  1 21  0              1718.7074400  1718.7068728  0.0005672 -0.0004000 0.0000540  1718.7067913  0.0006487 0.5000
 3171:  19  0 19  2 20  0 20  0              1718.8207700  1718.8199947  0.0007753 -0.0004000 0.0000503  1718.8201211  0.0006489 0.5000
 3172:  19  1 19  2 20  1 20  0              1718.8207700  1718.8202475  0.0005225 -0.0004000 0.0000503  1718.8201211  0.0006489 0.5000
 3173:  15  2 13  2 16  2 14  0              1719.0206500  1719.0198122  0.0008378 -0.0004000 0.0000481
 3174:  17  1 17  2 18  1 18  0              1719.0477200  1719.0467743  0.0009457 -0.0004000 0.0000432
 3175:  15  1 15  2 16  1 16  0              1719.2731800  1719.2730992  0.0000808 -0.0004000 0.0000369
 3176:  13  3 10  2 14  3 11  0              1719.2761900  1719.2755132  0.0006768 -0.0004000 0.0000351
 3177:  12  2 10  2 13  2 11  0              1719.3970400  1719.3969381  0.0001019 -0.0004000 0.0000368
 3178:  12  2 11  2 13  2 12  0              1719.5190500  1719.5188734  0.0001766 -0.0004000 0.0000285
 3179:  10  4  6  2 11  4  7  0              1719.7155000  1719.7165586 -0.0010586 -0.0004000 0.0000352
 3180:   9  4  6  2 10  4  7  0              1719.8486300  1719.8478741  0.0007559 -0.0004000 0.0000587  1719.8480145  0.0006155 0.2000
 3181:   9  5  4  2 10  5  5  0              1719.8486300  1719.8484576  0.0001724 -0.0004000 0.0000587  1719.8480145  0.0006155 0.2000
 3182:   9  5  5  2 10  5  6  0              1719.8486300  1719.8484879  0.0001421 -0.0004000 0.0000587  1719.8480145  0.0006155 0.2000
 3183:   9  6  3  2 10  6  4  0              1719.8486300  1719.8476263  0.0010037 -0.0004000 0.0000587  1719.8480145  0.0006155 0.2000
 3184:   9  6  4  2 10  6  5  0              1719.8486300  1719.8476268  0.0010032 -0.0004000 0.0000587  1719.8480145  0.0006155 0.2000
 3185:   8  3  6  2  9  3  7  0              1719.9769200  1719.9776979 -0.0007779 -0.0004000 0.0000421  1719.9767932  0.0001268 0.2000
 3186:   8  4  4  2  9  4  5  0              1719.9769200  1719.9761930  0.0007270 -0.0004000 0.0000421  1719.9767932  0.0001268 0.2000
 3187:   8  4  5  2  9  4  6  0              1719.9769200  1719.9766866  0.0002334 -0.0004000 0.0000421  1719.9767932  0.0001268 0.2000
 3188:   8  5  3  2  9  5  4  0              1719.9769200  1719.9766889  0.0002311 -0.0004000 0.0000421  1719.9767932  0.0001268 0.2000
 3189:   8  5  4  2  9  5  5  0              1719.9769200  1719.9766998  0.0002202 -0.0004000 0.0000421  1719.9767932  0.0001268 0.2000
 3190:   7  3  5  2  8  3  6  0              1720.1047100  1720.1056112 -0.0009012 -0.0004000 0.0000361  1720.1051726 -0.0004626 0.3333
 3191:   7  4  3  2  8  4  4  0              1720.1047100  1720.1048498 -0.0001398 -0.0004000 0.0000361  1720.1051726 -0.0004626 0.3333
 3192:   7  4  4  2  8  4  5  0              1720.1047100  1720.1050569 -0.0003469 -0.0004000 0.0000361  1720.1051726 -0.0004626 0.3333
 3193:   5  1  4  2  6  1  5  0              1720.3297600  1720.3298203 -0.0000603 -0.0004000 0.0000291
 3194:   6  3  3  2  5  3  2  0              1721.8762000  1721.8766730 -0.0004730 -0.0004000 0.0000314  1721.8760168  0.0001832 0.5000
 3195:   6  3  4  2  5  3  3  0              1721.8762000  1721.8753606  0.0008394 -0.0004000 0.0000314  1721.8760168  0.0001832 0.5000
 3196:   7  3  5  2  6  3  4  0              1722.0009100  1722.0015324 -0.0006224 -0.0004000 0.0000302
 3197:   7  3  4  2  6  3  3  0              1722.0036300  1722.0044521 -0.0008221 -0.0004000 0.0000301
 3198:   8  3  6  2  7  3  5  0              1722.1271300  1722.1276650 -0.0005350 -0.0004000 0.0000291
 3199:   8  3  5  2  7  3  4  0              1722.1325700  1722.1334019 -0.0008319 -0.0004000 0.0000290
 3200:   9  2  8  2  8  2  7  0              1722.2349900  1722.2342962  0.0006938 -0.0004000 0.0000267
 3201:   9  3  7  2  8  3  6  0              1722.2534800  1722.2536203 -0.0001403 -0.0004000 0.0000283
 3202:   9  3  6  2  8  3  5  0              1722.2631100  1722.2638637 -0.0007537 -0.0004000 0.0000282
 3203:   9  2  7  2  8  2  6  0              1722.2998400  1722.2991218  0.0007182 -0.0004000 0.0000289
 3204:  10  3  7  2  9  3  6  0              1722.3952500  1722.3961389 -0.0008889 -0.0004000 0.0000280
 3205:  10  2  8  2  9  2  7  0              1722.4337900  1722.4336253  0.0001647 -0.0004000 0.0000308
 3206:  11  3  9  2 10  3  8  0              1722.5039100  1722.5043312 -0.0004212 -0.0004000 0.0000281
 3207:  11  2  9  2 10  2  8  0              1722.5663500  1722.5665356 -0.0001856 -0.0004000 0.0000335
 3208:  12  2 11  2 11  2 10  0              1722.5896400  1722.5890512  0.0005888 -0.0004000 0.0000285
 3209:  12  3 10  2 11  3  9  0              1722.6288200  1722.6287318  0.0000882 -0.0004000 0.0000290
 3210:  13  2 12  2 12  2 11  0              1722.7053100  1722.7049854  0.0003246 -0.0004000 0.0000299
 3211:  13  3 11  2 12  3 10  0              1722.7517800  1722.7522690 -0.0004890 -0.0004000 0.0000305
 3212:  13  3 10  2 12  3  9  0              1722.8043400  1722.8039965  0.0003435 -0.0004000 0.0000351
 3213:  14  2 13  2 13  2 12  0              1722.8201800  1722.8198086  0.0003714 -0.0004000 0.0000317
 3214:  13  2 11  2 12  2 10  0              1722.8256700  1722.8256791 -0.0000091 -0.0004000 0.0000405
 3215:  15  1 15  2 14  1 14  0              1722.8346900  1722.8346221  0.0000679 -0.0004000 0.0000369
 3216:  15  0 15  2 14  0 14  0              1722.8375500  1722.8366811  0.0008689 -0.0004000 0.0000368
 3217:  14  1 13  2 13  1 12  0              1722.8559500  1722.8553907  0.0005593 -0.0004000 0.0000347
 3218:  14  8  6  2 13  8  5  0              1722.8624500  1722.8623141  0.0001359 -0.0004000 0.0001282  1722.8623141  0.0001359 0.5000
 3219:  14  8  7  2 13  8  6  0              1722.8624500  1722.8623141  0.0001359 -0.0004000 0.0001282  1722.8623141  0.0001359 0.5000
 3220:  14  3 12  2 13  3 11  0              1722.8743600  1722.8747941 -0.0004341 -0.0004000 0.0000327
 3221:  15  2 14  2 14  2 13  0              1722.9335300  1722.9335934 -0.0000634 -0.0004000 0.0000338
 3222:  14  3 11  2 13  3 10  0              1722.9423200  1722.9421197  0.0002003 -0.0004000 0.0000403
 3223:  16  0 16  2 15  0 15  0              1722.9454900  1722.9459781 -0.0004881 -0.0004000 0.0000399  1722.9452889  0.0002011 0.5000
 3224:  16  1 16  2 15  1 15  0              1722.9454900  1722.9445996  0.0008904 -0.0004000 0.0000399  1722.9452889  0.0002011 0.5000
 3225:  14  2 12  2 13  2 11  0              1722.9516900  1722.9511598  0.0005302 -0.0004000 0.0000444
 3226:  15  1 14  2 14  1 13  0              1722.9629600  1722.9626844  0.0002756 -0.0004000 0.0000362
 3227:  15  8  7  2 14  8  6  0              1722.9883300  1722.9876062  0.0007238 -0.0004000 0.0001256  1722.9876062  0.0007238 0.5000
 3228:  15  8  8  2 14  8  7  0              1722.9883300  1722.9876061  0.0007239 -0.0004000 0.0001256  1722.9876062  0.0007238 0.5000
 3229:  15  3 13  2 14  3 12  0              1722.9957400  1722.9961843 -0.0004443 -0.0004000 0.0000353
 3230:  16  2 15  2 15  2 14  0              1723.0458700  1723.0464352 -0.0005652 -0.0004000 0.0000362
 3231:  17  0 17  2 16  0 16  0              1723.0553800  1723.0552934  0.0000866 -0.0004000 0.0000432
 3232:  15  2 13  2 14  2 12  0              1723.0725500  1723.0734640 -0.0009140 -0.0004000 0.0000481
 3233:  15  3 12  2 14  3 11  0              1723.0801500  1723.0799058  0.0002442 -0.0004000 0.0000466
 3234:  17  2 16  2 16  2 15  0              1723.1584600  1723.1584438  0.0000162 -0.0004000 0.0000388
 3235:  18  0 18  2 17  0 17  0              1723.1643700  1723.1645930 -0.0002230 -0.0004000 0.0000467  1723.1642928  0.0000772 0.5000
 3236:  18  1 18  2 17  1 17  0              1723.1643700  1723.1639926  0.0003774 -0.0004000 0.0000467  1723.1642928  0.0000772 0.5000
 3237:  17  1 16  2 16  1 15  0              1723.1753300  1723.1759150 -0.0005850 -0.0004000 0.0000400
 3238:  16  2 14  2 15  2 13  0              1723.1920300  1723.1923227 -0.0002927 -0.0004000 0.0000516
 3239:  16  3 13  2 15  3 12  0              1723.2163200  1723.2164233 -0.0001033 -0.0004000 0.0000535
 3240:  17  9  8  2 16  9  7  0              1723.2324100  1723.2324995 -0.0000895 -0.0004000 0.0001588  1723.2324995 -0.0000895 0.5000
 3241:  17  9  9  2 16  9  8  0              1723.2324100  1723.2324995 -0.0000895 -0.0004000 0.0001588  1723.2324995 -0.0000895 0.5000
 3242:  17  3 15  2 16  3 14  0              1723.2352700  1723.2352255  0.0000445 -0.0004000 0.0000414
 3243:  19  0 19  2 18  0 18  0              1723.2742200  1723.2738512  0.0003688 -0.0004000 0.0000503  1723.2736554  0.0005646 0.5000
 3244:  19  1 19  2 18  1 18  0              1723.2742200  1723.2734596  0.0007604 -0.0004000 0.0000503  1723.2736554  0.0005646 0.5000
 3245:  18  1 17  2 17  1 16  0              1723.2828900  1723.2827057  0.0001843 -0.0004000 0.0000423
 3246:  20  0 20  2 19  0 19  0              1723.3832600  1723.3830497  0.0002103 -0.0004000 0.0000540  1723.3829228  0.0003372 0.5000
 3247:  20  1 20  2 19  1 19  0              1723.3832600  1723.3827959  0.0004641 -0.0004000 0.0000540  1723.3829228  0.0003372 0.5000
 3248:  18  2 16  2 17  2 15  0              1723.4190500  1723.4194517 -0.0004017 -0.0004000 0.0000568
 3249:  21  0 21  2 20  0 20  0              1723.4924300  1723.4921755  0.0002545 -0.0004000 0.0000577  1723.4920937  0.0003363 0.5000
 3250:  21  1 21  2 20  1 20  0              1723.4924300  1723.4920119  0.0004181 -0.0004000 0.0000577  1723.4920937  0.0003363 0.5000
 3251:  19  2 17  2 18  2 16  0              1723.5277800  1723.5282732 -0.0004932 -0.0004000 0.0000587
 3252:  20 10 10  2 19 10  9  0              1723.6010300  1723.6013607 -0.0003307 -0.0004000 0.0000827  1723.6010882 -0.0000582 0.2000
 3253:  20 10 11  2 19 10 10  0              1723.6010300  1723.6013607 -0.0003307 -0.0004000 0.0000827  1723.6010882 -0.0000582 0.2000
 3254:  21  2 20  2 20  2 19  0              1723.6010300  1723.6003852  0.0006448 -0.0004000 0.0000827  1723.6010882 -0.0000582 0.2000
 3255:  22  0 22  2 21  0 21  0              1723.6010300  1723.6012196 -0.0001896 -0.0004000 0.0000827  1723.6010882 -0.0000582 0.2000
 3256:  22  1 22  2 21  1 21  0              1723.6010300  1723.6011147 -0.0000847 -0.0004000 0.0000827  1723.6010882 -0.0000582 0.2000
 3257:  21  1 20  2 20  1 19  0              1723.6046700  1723.6051039 -0.0004339 -0.0004000 0.0000499
 3258:  22  2 21  2 21  2 20  0              1723.7102800  1723.7098316  0.0004484 -0.0004000 0.0000594  1723.7100386  0.0002414 0.3333
 3259:  23  0 23  2 22  0 22  0              1723.7102800  1723.7101756  0.0001044 -0.0004000 0.0000594  1723.7100386  0.0002414 0.3333
 3260:  23  1 23  2 22  1 22  0              1723.7102800  1723.7101086  0.0001714 -0.0004000 0.0000594  1723.7100386  0.0002414 0.3333
 3261:  22  1 21  2 21  1 20  0              1723.7130300  1723.7131046 -0.0000746 -0.0004000 0.0000524
 3262:  20  4 16  2 19  4 15  0              1723.7191100  1723.7192210 -0.0001110 -0.0004000 0.0001556  1723.7194210 -0.0003110 0.3333
 3263:  21 11 10  2 20 11  9  0              1723.7191100  1723.7195210 -0.0004110 -0.0004000 0.0001556  1723.7194210 -0.0003110 0.3333
 3264:  21 11 11  2 20 11 10  0              1723.7191100  1723.7195210 -0.0004110 -0.0004000 0.0001556  1723.7194210 -0.0003110 0.3333
 3265:  21 10 11  2 20 10 10  0              1723.7260700  1723.7262814 -0.0002114 -0.0004000 0.0001901  1723.7262814 -0.0002114 0.5000
 3266:  21 10 12  2 20 10 11  0              1723.7260700  1723.7262814 -0.0002114 -0.0004000 0.0001901  1723.7262814 -0.0002114 0.5000
 3267:  23  2 22  2 22  2 21  0              1723.8193200  1723.8190083  0.0003117 -0.0004000 0.0000625  1723.8190148  0.0003052 0.3333
 3268:  24  0 24  2 23  0 23  0              1723.8193200  1723.8190394  0.0002806 -0.0004000 0.0000625  1723.8190148  0.0003052 0.3333
 3269:  24  1 24  2 23  1 23  0              1723.8193200  1723.8189968  0.0003232 -0.0004000 0.0000625  1723.8190148  0.0003052 0.3333
 3270:  24  2 23  2 23  2 22  0              1723.9279400  1723.9279638 -0.0000238 -0.0004000 0.0000655  1723.9278509  0.0000891 0.3333
 3271:  25  0 25  2 24  0 24  0              1723.9279400  1723.9278080  0.0001320 -0.0004000 0.0000655  1723.9278509  0.0000891 0.3333
 3272:  25  1 25  2 24  1 24  0              1723.9279400  1723.9277810  0.0001590 -0.0004000 0.0000655  1723.9278509  0.0000891 0.3333
 3273:  25  1 24  2 24  1 23  0              1724.0366900  1724.0377642 -0.0010742 -0.0004000 0.0000653  1724.0368601 -0.0001701 0.2500
 3274:  25  2 24  2 24  2 23  0              1724.0366900  1724.0367345 -0.0000445 -0.0004000 0.0000653  1724.0368601 -0.0001701 0.2500
 3275:  26  0 26  2 25  0 25  0              1724.0366900  1724.0364793  0.0002107 -0.0004000 0.0000653  1724.0368601 -0.0001701 0.2500
 3276:  26  1 26  2 25  1 25  0              1724.0366900  1724.0364623  0.0002277 -0.0004000 0.0000653  1724.0368601 -0.0001701 0.2500
 3277:  24  6 19  2 23  6 18  0              1724.1451600  1724.1451617 -0.0000017 -0.0004000 0.0000598  1724.1453277 -0.0001677 0.2000
 3278:  26  1 25  2 25  1 24  0              1724.1451600  1724.1460366 -0.0008766 -0.0004000 0.0000598  1724.1453277 -0.0001677 0.2000
 3279:  26  2 25  2 25  2 24  0              1724.1451600  1724.1453471 -0.0001871 -0.0004000 0.0000598  1724.1453277 -0.0001677 0.2000
 3280:  27  0 27  2 26  0 26  0              1724.1451600  1724.1450520  0.0001080 -0.0004000 0.0000598  1724.1453277 -0.0001677 0.2000
 3281:  27  1 27  2 26  1 26  0              1724.1451600  1724.1450412  0.0001188 -0.0004000 0.0000598  1724.1453277 -0.0001677 0.2000
 3282:  26  3 24  2 25  3 23  0              1724.2534800  1724.2534865 -0.0000065 -0.0004000 0.0000654  1724.2537261 -0.0002461 0.2000
 3283:  27  1 26  2 26  1 25  0              1724.2534800  1724.2542798 -0.0007998 -0.0004000 0.0000654  1724.2537261 -0.0002461 0.2000
 3284:  27  2 26  2 26  2 25  0              1724.2534800  1724.2538210 -0.0003410 -0.0004000 0.0000654  1724.2537261 -0.0002461 0.2000
 3285:  28  0 28  2 27  0 27  0              1724.2534800  1724.2535250 -0.0000450 -0.0004000 0.0000654  1724.2537261 -0.0002461 0.2000
 3286:  28  1 28  2 27  1 27  0              1724.2534800  1724.2535182 -0.0000382 -0.0004000 0.0000654  1724.2537261 -0.0002461 0.2000
 3287:  26  9 17  2 25  9 16  0              1724.3619200  1724.3612548  0.0006652 -0.0004000 0.0000649  1724.3619539 -0.0000339 0.1667
 3288:  26  9 18  2 25  9 17  0              1724.3619200  1724.3612478  0.0006722 -0.0004000 0.0000649  1724.3619539 -0.0000339 0.1667
 3289:  27  3 25  2 26  3 24  0              1724.3619200  1724.3626809 -0.0007609 -0.0004000 0.0000649  1724.3619539 -0.0000339 0.1667
 3290:  28  1 27  2 27  1 26  0              1724.3619200  1724.3624730 -0.0005530 -0.0004000 0.0000649  1724.3619539 -0.0000339 0.1667
 3291:  28  2 27  2 27  2 26  0              1724.3619200  1724.3621696 -0.0002496 -0.0004000 0.0000649  1724.3619539 -0.0000339 0.1667
 3292:  29  0 29  2 28  0 28  0              1724.3619200  1724.3618975  0.0000225 -0.0004000 0.0000649  1724.3619539 -0.0000339 0.1667
 3293:  29  1 28  2 28  1 27  0              1724.4699200  1724.4706017 -0.0006817 -0.0004000 0.0000743  1724.4703348 -0.0004148 0.2500
 3294:  29  2 28  2 28  2 27  0              1724.4699200  1724.4704019 -0.0004819 -0.0004000 0.0000743  1724.4703348 -0.0004148 0.2500
 3295:  30  0 30  2 29  0 29  0              1724.4699200  1724.4701690 -0.0002490 -0.0004000 0.0000743  1724.4703348 -0.0004148 0.2500
 3296:  30  1 30  2 29  1 29  0              1724.4699200  1724.4701664 -0.0002464 -0.0004000 0.0000743  1724.4703348 -0.0004148 0.2500
 3297:  30  1 29  2 29  1 28  0              1724.5782400  1724.5786550 -0.0004150 -0.0004000 0.0000764  1724.5784639 -0.0002239 0.2500
 3298:  30  2 29  2 29  2 28  0              1724.5782400  1724.5785242 -0.0002842 -0.0004000 0.0000764  1724.5784639 -0.0002239 0.2500
 3299:  31  0 31  2 30  0 30  0              1724.5782400  1724.5783390 -0.0000990 -0.0004000 0.0000764  1724.5784639 -0.0002239 0.2500
 3300:  31  1 31  2 30  1 30  0              1724.5782400  1724.5783374 -0.0000974 -0.0004000 0.0000764  1724.5784639 -0.0002239 0.2500
 3301:  31  1 30  2 30  1 29  0              1724.6861900  1724.6866256 -0.0004356 -0.0004000 0.0000787  1724.6864948 -0.0003048 0.2500
 3302:  31  2 30  2 30  2 29  0              1724.6861900  1724.6865403 -0.0003503 -0.0004000 0.0000787  1724.6864948 -0.0003048 0.2500
 3303:  32  0 32  2 31  0 31  0              1724.6861900  1724.6864072 -0.0002172 -0.0004000 0.0000787  1724.6864948 -0.0003048 0.2500
 3304:  32  1 32  2 31  1 31  0              1724.6861900  1724.6864061 -0.0002161 -0.0004000 0.0000787  1724.6864948 -0.0003048 0.2500
 3305:  30  4 27  2 29  4 26  0              1724.7944500  1724.7941784  0.0002716 -0.0004000 0.0000706  1724.7943769  0.0000731 0.2000
 3306:  32  1 31  2 31  1 30  0              1724.7944500  1724.7945081 -0.0000581 -0.0004000 0.0000706  1724.7943769  0.0000731 0.2000
 3307:  32  2 31  2 31  2 30  0              1724.7944500  1724.7944527 -0.0000027 -0.0004000 0.0000706  1724.7943769  0.0000731 0.2000
 3308:  33  0 33  2 32  0 32  0              1724.7944500  1724.7943731  0.0000769 -0.0004000 0.0000706  1724.7943769  0.0000731 0.2000
 3309:  33  1 33  2 32  1 32  0              1724.7944500  1724.7943724  0.0000776 -0.0004000 0.0000706  1724.7943769  0.0000731 0.2000
 3310:  33  1 32  2 32  1 31  0              1724.9017200  1724.9022985 -0.0005785 -0.0004000 0.0000846  1724.9022584 -0.0005384 0.2500
 3311:  33  2 32  2 32  2 31  0              1724.9017200  1724.9022626 -0.0005426 -0.0004000 0.0000846  1724.9022584 -0.0005384 0.2500
 3312:  34  0 34  2 33  0 33  0              1724.9017200  1724.9022364 -0.0005164 -0.0004000 0.0000846  1724.9022584 -0.0005384 0.2500
 3313:  34  1 34  2 33  1 33  0              1724.9017200  1724.9022360 -0.0005160 -0.0004000 0.0000846  1724.9022584 -0.0005384 0.2500
 3314:  34  1 33  2 33  1 32  0              1725.0098600  1725.0099941 -0.0001341 -0.0004000 0.0000888  1725.0099896 -0.0001296 0.2500
 3315:  34  2 33  2 33  2 32  0              1725.0098600  1725.0099709 -0.0001109 -0.0004000 0.0000888  1725.0099896 -0.0001296 0.2500
 3316:  35  0 35  2 34  0 34  0              1725.0098600  1725.0099969 -0.0001369 -0.0004000 0.0000888  1725.0099896 -0.0001296 0.2500
 3317:  35  1 35  2 34  1 34  0              1725.0098600  1725.0099967 -0.0001367 -0.0004000 0.0000888  1725.0099896 -0.0001296 0.2500
 3318:  35  1 34  2 34  1 33  0              1725.1177300  1725.1175927  0.0001373 -0.0004000 0.0000942  1725.1176197  0.0001103 0.2500
 3319:  35  2 34  2 34  2 33  0              1725.1177300  1725.1175778  0.0001522 -0.0004000 0.0000942  1725.1176197  0.0001103 0.2500
 3320:  36  0 36  2 35  0 35  0              1725.1177300  1725.1176543  0.0000757 -0.0004000 0.0000942  1725.1176197  0.0001103 0.2500
 3321:  36  1 36  2 35  1 35  0              1725.1177300  1725.1176541  0.0000759 -0.0004000 0.0000942  1725.1176197  0.0001103 0.2500
 3322:  35  3 33  2 34  3 32  0              1725.2255100  1725.2266043 -0.0010943 -0.0004000 0.0000916  1725.2254394  0.0000706 0.2000
 3323:  36  1 35  2 35  1 34  0              1725.2255100  1725.2250929  0.0004171 -0.0004000 0.0000916  1725.2254394  0.0000706 0.2000
 3324:  36  2 35  2 35  2 34  0              1725.2255100  1725.2250834  0.0004266 -0.0004000 0.0000916  1725.2254394  0.0000706 0.2000
 3325:  37  0 37  2 36  0 36  0              1725.2255100  1725.2252083  0.0003017 -0.0004000 0.0000916  1725.2254394  0.0000706 0.2000
 3326:  37  1 37  2 36  1 36  0              1725.2255100  1725.2252082  0.0003018 -0.0004000 0.0000916  1725.2254394  0.0000706 0.2000
 3327:  34 12 22  2 33 12 21  0              1725.3329200  1725.3314648  0.0014552 -0.0004000 0.0001022  1725.3324478  0.0004722 0.1429
 3328:  34 12 23  2 33 12 22  0              1725.3329200  1725.3314647  0.0014553 -0.0004000 0.0001022  1725.3324478  0.0004722 0.1429
 3329:  36  3 34  2 35  3 33  0              1725.3329200  1725.3339072 -0.0009872 -0.0004000 0.0001022  1725.3324478  0.0004722 0.1429
 3330:  37  1 36  2 36  1 35  0              1725.3329200  1725.3324934  0.0004266 -0.0004000 0.0001022  1725.3324478  0.0004722 0.1429
 3331:  37  2 36  2 36  2 35  0              1725.3329200  1725.3324873  0.0004327 -0.0004000 0.0001022  1725.3324478  0.0004722 0.1429
 3332:  38  0 38  2 37  0 37  0              1725.3329200  1725.3326586  0.0002614 -0.0004000 0.0001022  1725.3324478  0.0004722 0.1429
 3333:  38  1 38  2 37  1 37  0              1725.3329200  1725.3326586  0.0002614 -0.0004000 0.0001022  1725.3324478  0.0004722 0.1429
 3334:  38  1 37  2 37  1 36  0              1725.4397800  1725.4397933 -0.0000133 -0.0004000 0.0001209  1725.4398982 -0.0001182 0.2500
 3335:  38  2 37  2 37  2 36  0              1725.4397800  1725.4397894 -0.0000094 -0.0004000 0.0001209  1725.4398982 -0.0001182 0.2500
 3336:  39  0 39  2 38  0 38  0              1725.4397800  1725.4400051 -0.0002251 -0.0004000 0.0001209  1725.4398982 -0.0001182 0.2500
 3337:  39  1 39  2 38  1 38  0              1725.4397800  1725.4400050 -0.0002250 -0.0004000 0.0001209  1725.4398982 -0.0001182 0.2500
 3338:  34  6 28  2 33  6 27  0              1725.5480000  1725.5473362  0.0006638 -0.0004000 0.0001013  1725.5474751  0.0005249 0.1429
 3339:  38  2 36  2 37  2 35  0              1725.5480000  1725.5483149 -0.0003149 -0.0004000 0.0001013  1725.5474751  0.0005249 0.1429
 3340:  38  3 36  2 37  3 35  0              1725.5480000  1725.5481993 -0.0001993 -0.0004000 0.0001013  1725.5474751  0.0005249 0.1429
 3341:  39  1 38  2 38  1 37  0              1725.5480000  1725.5469917  0.0010083 -0.0004000 0.0001013  1725.5474751  0.0005249 0.1429
 3342:  39  2 38  2 38  2 37  0              1725.5480000  1725.5469892  0.0010108 -0.0004000 0.0001013  1725.5474751  0.0005249 0.1429
 3343:  40  0 40  2 39  0 39  0              1725.5480000  1725.5472473  0.0007527 -0.0004000 0.0001013  1725.5474751  0.0005249 0.1429
 3344:  40  1 40  2 39  1 39  0              1725.5480000  1725.5472473  0.0007527 -0.0004000 0.0001013  1725.5474751  0.0005249 0.1429
 3345:  36  5 32  2 35  5 31  0              1725.5518000  1725.5513725  0.0004275 -0.0004000 0.0001126  1725.5515723  0.0002277 0.5000
 3346:  37  4 34  2 36  4 33  0              1725.5518000  1725.5517721  0.0000279 -0.0004000 0.0001126  1725.5515723  0.0002277 0.5000
 3347:  39  2 37  2 38  2 36  0              1725.6559400  1725.6552705  0.0006695 -0.0004000 0.0001076  1725.6552323  0.0007077 0.5000
 3348:  39  3 37  2 38  3 36  0              1725.6559400  1725.6551941  0.0007459 -0.0004000 0.0001076  1725.6552323  0.0007077 0.5000
 3349:  37  9 28  2 36  9 27  0              1725.7593200  1725.7595835 -0.0002635 -0.0004000 0.0001725
 3350:  45  2 43  2 44  2 42  0              1726.2942900  1726.2950880 -0.0007980 -0.0004000 0.0002790  1726.2948608 -0.0005708 0.1667
 3351:  45  3 43  2 44  3 42  0              1726.2942900  1726.2950821 -0.0007921 -0.0004000 0.0002790  1726.2948608 -0.0005708 0.1667
 3352:  46  1 45  2 45  1 44  0              1726.2942900  1726.2944937 -0.0002037 -0.0004000 0.0002790  1726.2948608 -0.0005708 0.1667
 3353:  46  2 45  2 45  2 44  0              1726.2942900  1726.2944936 -0.0002036 -0.0004000 0.0002790  1726.2948608 -0.0005708 0.1667
 3354:  47  0 47  2 46  0 46  0              1726.2942900  1726.2950037 -0.0007137 -0.0004000 0.0002790  1726.2948608 -0.0005708 0.1667
 3355:  47  1 47  2 46  1 46  0              1726.2942900  1726.2950037 -0.0007137 -0.0004000 0.0002790  1726.2948608 -0.0005708 0.1667
